# Supplementary material for: Unsupervised multi-scale clustering of single-cell transcriptomes to identify hierarchical structures of cell subtypes
Source: Research Square preprint supplement (doi:10.21203/rs.3.rs-5671748/v1), 2024-12-23
Supplement: Supplementary file 1 [file 2ebc21174d0d719baff8e3e4.xlsx]

## Sheet: A.Wu et al 2021. Cell meta data
A. Meta data for single-cell transcriptome of breast cancers from Wu et al. 2021.
NAME	Patient	Percent_mito	nCount_RNA	nFeature_RNA	celltype_major	celltype_minor	celltype_subset	subtype	gene_module	Calls	normal_cell_call	CNA_value
CID3586_AAGACCTCAGCATGAG	CID3586	1.50622	4581	1689	Endothelial	Endothelial ACKR1	Endothelial ACKR1	HER2+	no_gene_module	no_scTYPER_call	no_inferCNV_call	no_CNA_value
CID3586_AAGGTTCGTAGTACCT	CID3586	5.79374	1726	779	Endothelial	Endothelial ACKR1	Endothelial ACKR1	HER2+	no_gene_module	no_scTYPER_call	no_inferCNV_call	no_CNA_value
CID3586_ACCAGTAGTTGTGGCC	CID3586	1.38324	1229	514	Endothelial	Endothelial ACKR1	Endothelial ACKR1	HER2+	no_gene_module	no_scTYPER_call	no_inferCNV_call	no_CNA_value
CID3586_ACCCACTAGATGTCGG	CID3586	1.92308	1352	609	Endothelial	Endothelial ACKR1	Endothelial ACKR1	HER2+	no_gene_module	no_scTYPER_call	no_inferCNV_call	no_CNA_value
CID3586_ACTGATGGTCAACTGT	CID3586	13.3255	1711	807	Endothelial	Endothelial ACKR1	Endothelial ACKR1	HER2+	no_gene_module	no_scTYPER_call	no_inferCNV_call	no_CNA_value
CID3586_ACTTGTTAGGGAAACA	CID3586	3.61035	1468	764	Endothelial	Endothelial ACKR1	Endothelial ACKR1	HER2+	no_gene_module	no_scTYPER_call	no_inferCNV_call	no_CNA_value
CID3586_AGCAGCCTCCCTCTTT	CID3586	2.33209	1072	567	Endothelial	Endothelial ACKR1	Endothelial ACKR1	HER2+	no_gene_module	no_scTYPER_call	no_inferCNV_call	no_CNA_value
CID3586_AGCTTGATCGGCGCTA	CID3586	7.52106	1662	924	Endothelial	Endothelial ACKR1	Endothelial ACKR1	HER2+	no_gene_module	no_scTYPER_call	no_inferCNV_call	no_CNA_value
CID3586_ATCATCTAGGGATACC	CID3586	5.27307	1593	828	Endothelial	Endothelial ACKR1	Endothelial ACKR1	HER2+	no_gene_module	no_scTYPER_call	no_inferCNV_call	no_CNA_value
CID3586_ATGGGAGAGGAGCGAG	CID3586	1.63349	1959	966	Endothelial	Endothelial ACKR1	Endothelial ACKR1	HER2+	no_gene_module	no_scTYPER_call	no_inferCNV_call	no_CNA_value
CID3586_ATGTGTGAGTCAATAG	CID3586	7.7036	1363	767	Endothelial	Endothelial ACKR1	Endothelial ACKR1	HER2+	no_gene_module	no_scTYPER_call	no_inferCNV_call	no_CNA_value
CID3586_ATTATCCGTCCTAGCG	CID3586	9.82885	2045	1035	Endothelial	Endothelial ACKR1	Endothelial ACKR1	HER2+	no_gene_module	no_scTYPER_call	no_inferCNV_call	no_CNA_value
CID3586_ATTGGACTCCTATTCA	CID3586	8.01411	1984	927	Endothelial	Endothelial ACKR1	Endothelial ACKR1	HER2+	no_gene_module	no_scTYPER_call	no_inferCNV_call	no_CNA_value
CID3586_CAACTAGGTGTGAAAT	CID3586	15.7748	1439	790	Endothelial	Endothelial ACKR1	Endothelial ACKR1	HER2+	no_gene_module	no_scTYPER_call	no_inferCNV_call	no_CNA_value
CID3586_CAAGGCCAGTGTTTGC	CID3586	3.34928	2090	1182	Endothelial	Endothelial ACKR1	Endothelial ACKR1	HER2+	no_gene_module	no_scTYPER_call	no_inferCNV_call	no_CNA_value
CID3586_CAAGTTGAGATGCCTT	CID3586	6.80224	4278	1684	Endothelial	Endothelial ACKR1	Endothelial ACKR1	HER2+	no_gene_module	no_scTYPER_call	no_inferCNV_call	no_CNA_value
CID3586_CACAGTATCTACCAGA	CID3586	6.26459	2570	1280	Endothelial	Endothelial ACKR1	Endothelial ACKR1	HER2+	no_gene_module	no_scTYPER_call	no_inferCNV_call	no_CNA_value
CID3586_CAGATCATCCTTTACA	CID3586	3.32618	932	518	Endothelial	Endothelial ACKR1	Endothelial ACKR1	HER2+	no_gene_module	no_scTYPER_call	no_inferCNV_call	no_CNA_value
CID3586_CAGCCGAGTTGTCGCG	CID3586	2.97483	874	464	Endothelial	Endothelial ACKR1	Endothelial ACKR1	HER2+	no_gene_module	no_scTYPER_call	no_inferCNV_call	no_CNA_value
CID3586_CAGCTAAGTAACGACG	CID3586	0.128205	780	426	Endothelial	Endothelial ACKR1	Endothelial ACKR1	HER2+	no_gene_module	no_scTYPER_call	no_inferCNV_call	no_CNA_value
CID3586_CATCCACCAGGGATTG	CID3586	2.4236	1898	932	Endothelial	Endothelial ACKR1	Endothelial ACKR1	HER2+	no_gene_module	no_scTYPER_call	no_inferCNV_call	no_CNA_value
CID3586_CATTATCGTGGAAAGA	CID3586	1.21581	5264	1833	Endothelial	Endothelial ACKR1	Endothelial ACKR1	HER2+	no_gene_module	no_scTYPER_call	no_inferCNV_call	no_CNA_value
CID3586_CCACTACTCATAACCG	CID3586	2.92887	7170	2331	Endothelial	Endothelial ACKR1	Endothelial ACKR1	HER2+	no_gene_module	no_scTYPER_call	no_inferCNV_call	no_CNA_value
CID3586_CCTCTGATCAGTTAGC	CID3586	16.7296	795	458	Endothelial	Endothelial ACKR1	Endothelial ACKR1	HER2+	no_gene_module	no_scTYPER_call	no_inferCNV_call	no_CNA_value
CID3586_CCTTACGTCTACCAGA	CID3586	11.8545	1375	702	Endothelial	Endothelial ACKR1	Endothelial ACKR1	HER2+	no_gene_module	no_scTYPER_call	no_inferCNV_call	no_CNA_value
CID3586_CGAGCACCACAGACTT	CID3586	3.48353	5282	1810	Endothelial	Endothelial ACKR1	Endothelial ACKR1	HER2+	no_gene_module	no_scTYPER_call	no_inferCNV_call	no_CNA_value
CID3586_CGCCAAGCATCAGTCA	CID3586	3.26764	11721	3269	Endothelial	Endothelial ACKR1	Endothelial ACKR1	HER2+	no_gene_module	no_scTYPER_call	no_inferCNV_call	no_CNA_value
CID3586_CGTGTAAGTCCGACGT	CID3586	4.49285	1469	820	Endothelial	Endothelial ACKR1	Endothelial ACKR1	HER2+	no_gene_module	no_scTYPER_call	no_inferCNV_call	no_CNA_value
CID3586_CTAACTTAGTGTTGAA	CID3586	3.64146	1785	835	Endothelial	Endothelial ACKR1	Endothelial ACKR1	HER2+	no_gene_module	no_scTYPER_call	no_inferCNV_call	no_CNA_value
CID3586_CTAGAGTCACAGAGGT	CID3586	4.1646	2017	1020	Endothelial	Endothelial ACKR1	Endothelial ACKR1	HER2+	no_gene_module	no_scTYPER_call	no_inferCNV_call	no_CNA_value
CID3586_CTGCGGAAGCTTCGCG	CID3586	11.3015	4318	1645	Endothelial	Endothelial ACKR1	Endothelial ACKR1	HER2+	no_gene_module	no_scTYPER_call	no_inferCNV_call	no_CNA_value
CID3586_CTTTGCGAGAGAGCTC	CID3586	19.5701	884	498	Endothelial	Endothelial ACKR1	Endothelial ACKR1	HER2+	no_gene_module	no_scTYPER_call	no_inferCNV_call	no_CNA_value
CID3586_GAATGAAGTACTCGCG	CID3586	4.61459	19460	4320	Endothelial	Endothelial ACKR1	Endothelial ACKR1	HER2+	no_gene_module	no_scTYPER_call	no_inferCNV_call	no_CNA_value
CID3586_GACGCGTTCATGTCTT	CID3586	10.6676	1453	706	Endothelial	Endothelial ACKR1	Endothelial ACKR1	HER2+	no_gene_module	no_scTYPER_call	no_inferCNV_call	no_CNA_value
CID3586_GACTACAAGGCGTACA	CID3586	8.43672	1209	636	Endothelial	Endothelial ACKR1	Endothelial ACKR1	HER2+	no_gene_module	no_scTYPER_call	no_inferCNV_call	no_CNA_value
CID3586_GATCGATAGTAGATGT	CID3586	3.77229	1458	754	Endothelial	Endothelial ACKR1	Endothelial ACKR1	HER2+	no_gene_module	no_scTYPER_call	no_inferCNV_call	no_CNA_value
CID3586_GATCGTAGTATTACCG	CID3586	6.66667	1635	783	Endothelial	Endothelial ACKR1	Endothelial ACKR1	HER2+	no_gene_module	no_scTYPER_call	no_inferCNV_call	no_CNA_value
CID3586_GATGCTACAGCATGAG	CID3586	1.32042	3408	1108	Endothelial	Endothelial ACKR1	Endothelial ACKR1	HER2+	no_gene_module	no_scTYPER_call	no_inferCNV_call	no_CNA_value
CID3586_GATGCTATCGGCGCTA	CID3586	2.22892	1660	820	Endothelial	Endothelial ACKR1	Endothelial ACKR1	HER2+	no_gene_module	no_scTYPER_call	no_inferCNV_call	no_CNA_value
CID3586_GCAATCATCCGCATCT	CID3586	1.85078	1729	764	Endothelial	Endothelial ACKR1	Endothelial ACKR1	HER2+	no_gene_module	no_scTYPER_call	no_inferCNV_call	no_CNA_value
CID3586_GGAACTTGTCTAACGT	CID3586	0.57652	1908	719	Endothelial	Endothelial ACKR1	Endothelial ACKR1	HER2+	no_gene_module	no_scTYPER_call	no_inferCNV_call	no_CNA_value
CID3586_GGACAGATCGCTAGCG	CID3586	5.35906	1866	773	Endothelial	Endothelial ACKR1	Endothelial ACKR1	HER2+	no_gene_module	no_scTYPER_call	no_inferCNV_call	no_CNA_value
CID3586_GGTGTTACACTTAACG	CID3586	3.39044	11149	3263	Endothelial	Endothelial ACKR1	Endothelial ACKR1	HER2+	no_gene_module	no_scTYPER_call	no_inferCNV_call	no_CNA_value
CID3586_GTAACTGGTAGTAGTA	CID3586	5.84206	5255	2049	Endothelial	Endothelial ACKR1	Endothelial ACKR1	HER2+	no_gene_module	no_scTYPER_call	no_inferCNV_call	no_CNA_value
CID3586_GTAGTCATCCACGACG	CID3586	15.2582	852	540	Endothelial	Endothelial ACKR1	Endothelial ACKR1	HER2+	no_gene_module	no_scTYPER_call	no_inferCNV_call	no_CNA_value
CID3586_GTCGGGTGTCACACGC	CID3586	14.7222	1440	747	Endothelial	Endothelial ACKR1	Endothelial ACKR1	HER2+	no_gene_module	no_scTYPER_call	no_inferCNV_call	no_CNA_value
CID3586_GTGCATATCGACAGCC	CID3586	10.6497	1493	572	Endothelial	Endothelial ACKR1	Endothelial ACKR1	HER2+	no_gene_module	no_scTYPER_call	no_inferCNV_call	no_CNA_value
CID3586_GTTACAGGTACAGCAG	CID3586	5.42041	3782	1502	Endothelial	Endothelial ACKR1	Endothelial ACKR1	HER2+	no_gene_module	no_scTYPER_call	no_inferCNV_call	no_CNA_value
CID3586_TACCTTAGTGTCAATC	CID3586	5.48961	3370	1401	Endothelial	Endothelial ACKR1	Endothelial ACKR1	HER2+	no_gene_module	no_scTYPER_call	no_inferCNV_call	no_CNA_value
CID3586_TACGGGCTCACAGGCC	CID3586	2.94402	2072	844	Endothelial	Endothelial ACKR1	Endothelial ACKR1	HER2+	no_gene_module	no_scTYPER_call	no_inferCNV_call	no_CNA_value
CID3586_TACTCGCAGTTCGATC	CID3586	5.65806	4878	1875	Endothelial	Endothelial ACKR1	Endothelial ACKR1	HER2+	no_gene_module	no_scTYPER_call	no_inferCNV_call	no_CNA_value
CID3586_TCCCGATCACACAGAG	CID3586	5.376	3125	1160	Endothelial	Endothelial ACKR1	Endothelial ACKR1	HER2+	no_gene_module	no_scTYPER_call	no_inferCNV_call	no_CNA_value
CID3586_TCGCGAGAGAAGCCCA	CID3586	5.85662	4115	1392	Endothelial	Endothelial ACKR1	Endothelial ACKR1	HER2+	no_gene_module	no_scTYPER_call	no_inferCNV_call	no_CNA_value
CID3586_TGACAACAGTGGACGT	CID3586	3.30354	2573	977	Endothelial	Endothelial ACKR1	Endothelial ACKR1	HER2+	no_gene_module	no_scTYPER_call	no_inferCNV_call	no_CNA_value
CID3586_TGACTTTGTCTCTTTA	CID3586	1.65138	545	354	Endothelial	Endothelial ACKR1	Endothelial ACKR1	HER2+	no_gene_module	no_scTYPER_call	no_inferCNV_call	no_CNA_value
CID3586_TGACTTTTCCTTGACC	CID3586	0.546747	1829	876	Endothelial	Endothelial ACKR1	Endothelial ACKR1	HER2+	no_gene_module	no_scTYPER_call	no_inferCNV_call	no_CNA_value
CID3586_TTGACTTGTGGTCTCG	CID3586	12.3487	1652	752	Endothelial	Endothelial ACKR1	Endothelial ACKR1	HER2+	no_gene_module	no_scTYPER_call	no_inferCNV_call	no_CNA_value
CID3586_TTGACTTGTTAAGACA	CID3586	2.85614	11379	2987	Endothelial	Endothelial ACKR1	Endothelial ACKR1	HER2+	no_gene_module	no_scTYPER_call	no_inferCNV_call	no_CNA_value
CID3586_TTTATGCTCCCAGGTG	CID3586	8.15765	1091	507	Endothelial	Endothelial ACKR1	Endothelial ACKR1	HER2+	no_gene_module	no_scTYPER_call	no_inferCNV_call	no_CNA_value
CID3586_TTTGCGCTCGCGATCG	CID3586	7.30727	2737	1018	Endothelial	Endothelial ACKR1	Endothelial ACKR1	HER2+	no_gene_module	no_scTYPER_call	no_inferCNV_call	no_CNA_value
CID3586_TTTGGTTAGAGGTACC	CID3586	2.23854	8577	2570	Endothelial	Endothelial ACKR1	Endothelial ACKR1	HER2+	no_gene_module	no_scTYPER_call	no_inferCNV_call	no_CNA_value
CID3586_TTTGTCAGTCTTGATG	CID3586	1.2693	2915	1187	Endothelial	Endothelial ACKR1	Endothelial ACKR1	HER2+	no_gene_module	no_scTYPER_call	no_inferCNV_call	no_CNA_value
CID3586_ACCGTAATCGTTGACA	CID3586	8.68687	2475	1016	Endothelial	Endothelial ACKR1	Endothelial ACKR1	HER2+	no_gene_module	no_scTYPER_call	no_inferCNV_call	no_CNA_value
CID3586_ACTGAGTAGGTCATCT	CID3586	16.5869	627	385	Endothelial	Endothelial ACKR1	Endothelial ACKR1	HER2+	no_gene_module	no_scTYPER_call	no_inferCNV_call	no_CNA_value
CID3586_AGACGTTTCAAACGGG	CID3586	3.27476	1252	699	Endothelial	Endothelial ACKR1	Endothelial ACKR1	HER2+	no_gene_module	no_scTYPER_call	no_inferCNV_call	no_CNA_value
CID3586_CAGAGAGAGGTACTCT	CID3586	2.06754	1451	721	Endothelial	Endothelial ACKR1	Endothelial ACKR1	HER2+	no_gene_module	no_scTYPER_call	no_inferCNV_call	no_CNA_value
CID3586_GAACCTAAGGAATCGC	CID3586	5.83554	754	502	Endothelial	Endothelial ACKR1	Endothelial ACKR1	HER2+	no_gene_module	no_scTYPER_call	no_inferCNV_call	no_CNA_value
CID3586_GGTATTGAGCCCAATT	CID3586	1.67038	898	563	Endothelial	Endothelial ACKR1	Endothelial ACKR1	HER2+	no_gene_module	no_scTYPER_call	no_inferCNV_call	no_CNA_value
CID3586_GTTCTCGGTTCAGGCC	CID3586	5.76063	1788	909	Endothelial	Endothelial ACKR1	Endothelial ACKR1	HER2+	no_gene_module	no_scTYPER_call	no_inferCNV_call	no_CNA_value
CID3586_TATTACCTCGTCTGAA	CID3586	4.2777	1426	690	Endothelial	Endothelial ACKR1	Endothelial ACKR1	HER2+	no_gene_module	no_scTYPER_call	no_inferCNV_call	no_CNA_value
CID3586_TTTACTGTCTGAGTGT	CID3586	1.10596	2803	1283	Endothelial	Endothelial ACKR1	Endothelial ACKR1	HER2+	no_gene_module	no_scTYPER_call	no_inferCNV_call	no_CNA_value
CID3586_CTGGTCTTCGGGAGTA	CID3586	3.24111	2530	1156	Endothelial	Endothelial ACKR1	Endothelial ACKR1	HER2+	no_gene_module	no_scTYPER_call	no_inferCNV_call	no_CNA_value
CID3586_CAGTAACTCCTGCCAT	CID3586	1.05263	760	479	Endothelial	Endothelial ACKR1	Endothelial ACKR1	HER2+	no_gene_module	no_scTYPER_call	no_inferCNV_call	no_CNA_value
CID3586_CCGTGGACACCACGTG	CID3586	3.30148	3453	1400	Endothelial	Endothelial ACKR1	Endothelial ACKR1	HER2+	no_gene_module	no_scTYPER_call	no_inferCNV_call	no_CNA_value
CID3586_GTGCGGTAGTGTACGG	CID3586	3.47058	4639	1888	Endothelial	Endothelial ACKR1	Endothelial ACKR1	HER2+	no_gene_module	no_scTYPER_call	no_inferCNV_call	no_CNA_value
CID3586_AACTCTTGTTCCTCCA	CID3586	8.13226	1119	591	Endothelial	Endothelial ACKR1	Endothelial ACKR1	HER2+	no_gene_module	no_scTYPER_call	no_inferCNV_call	no_CNA_value
CID3586_AAGACCTGTTAAGTAG	CID3586	14.951	816	510	Endothelial	Endothelial ACKR1	Endothelial ACKR1	HER2+	no_gene_module	no_scTYPER_call	no_inferCNV_call	no_CNA_value
CID3586_GCAAACTAGAGGGCTT	CID3586	5.1412	1381	749	Endothelial	Endothelial ACKR1	Endothelial ACKR1	HER2+	no_gene_module	no_scTYPER_call	no_inferCNV_call	no_CNA_value
CID3586_TACGGATCATCGACGC	CID3586	4.62633	3653	1493	Endothelial	Endothelial ACKR1	Endothelial ACKR1	HER2+	no_gene_module	no_scTYPER_call	no_inferCNV_call	no_CNA_value
CID3586_TACTCATTCTCCAACC	CID3586	2.70968	2325	1266	Endothelial	Endothelial ACKR1	Endothelial ACKR1	HER2+	no_gene_module	no_scTYPER_call	no_inferCNV_call	no_CNA_value
CID3586_GCATGCGAGGATATAC	CID3586	0.982801	814	590	Endothelial	Endothelial RGS5	Endothelial RGS5	HER2+	no_gene_module	no_scTYPER_call	no_inferCNV_call	no_CNA_value
CID3586_TGGCCAGAGTCCGTAT	CID3586	8.02708	1034	575	Endothelial	Endothelial RGS5	Endothelial RGS5	HER2+	no_gene_module	no_scTYPER_call	no_inferCNV_call	no_CNA_value
CID3586_ACAGCCGCAGGAATGC	CID3586	7.56458	1626	903	Endothelial	Endothelial RGS5	Endothelial RGS5	HER2+	no_gene_module	no_scTYPER_call	no_inferCNV_call	no_CNA_value
CID3586_ACTGATGAGCTAGGCA	CID3586	6.6044	2998	1131	Endothelial	Endothelial RGS5	Endothelial RGS5	HER2+	no_gene_module	no_scTYPER_call	no_inferCNV_call	no_CNA_value
CID3586_TACTCATTCCACGTGG	CID3586	5.41796	646	438	Endothelial	Endothelial RGS5	Endothelial RGS5	HER2+	no_gene_module	no_scTYPER_call	no_inferCNV_call	no_CNA_value
CID3586_AACTCAGAGAGGGCTT	CID3586	1.04371	1533	717	Endothelial	Endothelial RGS5	Endothelial RGS5	HER2+	no_gene_module	no_scTYPER_call	no_inferCNV_call	no_CNA_value
CID3586_AAGTCTGAGACTAGGC	CID3586	2.8098	4164	1754	Endothelial	Endothelial RGS5	Endothelial RGS5	HER2+	no_gene_module	no_scTYPER_call	no_inferCNV_call	no_CNA_value
CID3586_ACTTGTTCAGTCGATT	CID3586	7.54794	2451	1096	Endothelial	Endothelial RGS5	Endothelial RGS5	HER2+	no_gene_module	no_scTYPER_call	no_inferCNV_call	no_CNA_value
CID3586_AGCGGTCAGTCCATAC	CID3586	12.3106	528	321	Endothelial	Endothelial RGS5	Endothelial RGS5	HER2+	no_gene_module	no_scTYPER_call	no_inferCNV_call	no_CNA_value
CID3586_CACCTTGCATGGGACA	CID3586	1.46138	958	644	Endothelial	Endothelial RGS5	Endothelial RGS5	HER2+	no_gene_module	no_scTYPER_call	no_inferCNV_call	no_CNA_value
CID3586_CAGAATCTCTTACCGC	CID3586	4.49193	2293	1208	Endothelial	Endothelial RGS5	Endothelial RGS5	HER2+	no_gene_module	no_scTYPER_call	no_inferCNV_call	no_CNA_value
CID3586_CAGCTAATCTTGAGAC	CID3586	6.4663	1098	571	Endothelial	Endothelial RGS5	Endothelial RGS5	HER2+	no_gene_module	no_scTYPER_call	no_inferCNV_call	no_CNA_value
CID3586_CAGGTGCAGCCAGTTT	CID3586	1.55875	3336	1468	Endothelial	Endothelial RGS5	Endothelial RGS5	HER2+	no_gene_module	no_scTYPER_call	no_inferCNV_call	no_CNA_value
CID3586_CATCAGACACACAGAG	CID3586	3.49515	1030	623	Endothelial	Endothelial RGS5	Endothelial RGS5	HER2+	no_gene_module	no_scTYPER_call	no_inferCNV_call	no_CNA_value
CID3586_CCGGTAGTCACAACGT	CID3586	10.3337	929	569	Endothelial	Endothelial RGS5	Endothelial RGS5	HER2+	no_gene_module	no_scTYPER_call	no_inferCNV_call	no_CNA_value
CID3586_CCTTACGGTCACACGC	CID3586	3.28383	4781	1542	Endothelial	Endothelial RGS5	Endothelial RGS5	HER2+	no_gene_module	no_scTYPER_call	no_inferCNV_call	no_CNA_value
CID3586_CGCCAAGAGGACTGGT	CID3586	4.23049	1371	760	Endothelial	Endothelial RGS5	Endothelial RGS5	HER2+	no_gene_module	no_scTYPER_call	no_inferCNV_call	no_CNA_value
CID3586_CGCGTTTGTTTGACAC	CID3586	7.91946	745	463	Endothelial	Endothelial RGS5	Endothelial RGS5	HER2+	no_gene_module	no_scTYPER_call	no_inferCNV_call	no_CNA_value
CID3586_CTACACCTCCAAACTG	CID3586	2.75468	1924	971	Endothelial	Endothelial RGS5	Endothelial RGS5	HER2+	no_gene_module	no_scTYPER_call	no_inferCNV_call	no_CNA_value
CID3586_GAACCTATCGCAAGCC	CID3586	9.62199	291	230	Endothelial	Endothelial RGS5	Endothelial RGS5	HER2+	no_gene_module	no_scTYPER_call	no_inferCNV_call	no_CNA_value
CID3586_GACAGAGGTCTTGATG	CID3586	11.6444	1271	706	Endothelial	Endothelial RGS5	Endothelial RGS5	HER2+	no_gene_module	no_scTYPER_call	no_inferCNV_call	no_CNA_value
CID3586_GACGGCTGTAAACACA	CID3586	8.07018	1140	698	Endothelial	Endothelial RGS5	Endothelial RGS5	HER2+	no_gene_module	no_scTYPER_call	no_inferCNV_call	no_CNA_value
CID3586_GCCTCTAAGGAGCGAG	CID3586	1.1685	4279	1731	Endothelial	Endothelial RGS5	Endothelial RGS5	HER2+	no_gene_module	no_scTYPER_call	no_inferCNV_call	no_CNA_value
CID3586_GCTGCGAAGCGCCTCA	CID3586	4.7541	1220	615	Endothelial	Endothelial RGS5	Endothelial RGS5	HER2+	no_gene_module	no_scTYPER_call	no_inferCNV_call	no_CNA_value
CID3586_TAGCCGGGTAGCGTCC	CID3586	9.47631	802	454	Endothelial	Endothelial RGS5	Endothelial RGS5	HER2+	no_gene_module	no_scTYPER_call	no_inferCNV_call	no_CNA_value
CID3586_TATCAGGAGTGCGATG	CID3586	3.06513	1566	754	Endothelial	Endothelial RGS5	Endothelial RGS5	HER2+	no_gene_module	no_scTYPER_call	no_inferCNV_call	no_CNA_value
CID3586_TGAGAGGGTCTAAAGA	CID3586	9.96377	1104	583	Endothelial	Endothelial RGS5	Endothelial RGS5	HER2+	no_gene_module	no_scTYPER_call	no_inferCNV_call	no_CNA_value
CID3586_TGAGCATTCTCCGGTT	CID3586	1.38504	1083	661	Endothelial	Endothelial RGS5	Endothelial RGS5	HER2+	no_gene_module	no_scTYPER_call	no_inferCNV_call	no_CNA_value
CID3586_TTGGAACCATTAGCCA	CID3586	7.90191	4037	1750	Endothelial	Endothelial RGS5	Endothelial RGS5	HER2+	no_gene_module	no_scTYPER_call	no_inferCNV_call	no_CNA_value
CID3586_AACACGTGTGTGGTTT	CID3586	1.6369	672	450	Endothelial	Endothelial CXCL12	Endothelial CXCL12	HER2+	no_gene_module	no_scTYPER_call	no_inferCNV_call	no_CNA_value
CID3586_ACGCAGCGTCATCGGC	CID3586	6.83403	717	437	Endothelial	Endothelial CXCL12	Endothelial CXCL12	HER2+	no_gene_module	no_scTYPER_call	no_inferCNV_call	no_CNA_value
CID3586_AGGCCACAGAGTACAT	CID3586	1.94265	2162	1133	Endothelial	Endothelial CXCL12	Endothelial CXCL12	HER2+	no_gene_module	no_scTYPER_call	no_inferCNV_call	no_CNA_value
CID3586_AGTGGGACACAGCCCA	CID3586	8.0631	1141	641	Endothelial	Endothelial CXCL12	Endothelial CXCL12	HER2+	no_gene_module	no_scTYPER_call	no_inferCNV_call	no_CNA_value
CID3586_ATTGGTGTCATCACCC	CID3586	3.95522	1340	742	Endothelial	Endothelial CXCL12	Endothelial CXCL12	HER2+	no_gene_module	no_scTYPER_call	no_inferCNV_call	no_CNA_value
CID3586_CAAGATCAGTGAACAT	CID3586	3.36559	2377	1010	Endothelial	Endothelial CXCL12	Endothelial CXCL12	HER2+	no_gene_module	no_scTYPER_call	no_inferCNV_call	no_CNA_value
CID3586_CGGAGTCTCTGCCAGG	CID3586	1.71103	2104	938	Endothelial	Endothelial CXCL12	Endothelial CXCL12	HER2+	no_gene_module	no_scTYPER_call	no_inferCNV_call	no_CNA_value
CID3586_CTACCCAGTAAACCTC	CID3586	4.17227	743	476	Endothelial	Endothelial CXCL12	Endothelial CXCL12	HER2+	no_gene_module	no_scTYPER_call	no_inferCNV_call	no_CNA_value
CID3586_GGACAGACATTCTCAT	CID3586	11.713	683	475	Endothelial	Endothelial CXCL12	Endothelial CXCL12	HER2+	no_gene_module	no_scTYPER_call	no_inferCNV_call	no_CNA_value
CID3586_GTGCATAGTTTGTGTG	CID3586	4.46735	873	558	Endothelial	Endothelial CXCL12	Endothelial CXCL12	HER2+	no_gene_module	no_scTYPER_call	no_inferCNV_call	no_CNA_value
CID3586_GTTCGGGTCAAGAAGT	CID3586	12.372	1172	721	Endothelial	Endothelial CXCL12	Endothelial CXCL12	HER2+	no_gene_module	no_scTYPER_call	no_inferCNV_call	no_CNA_value
CID3586_TAGACCACAGGGAGAG	CID3586	7.76699	309	241	Endothelial	Endothelial CXCL12	Endothelial CXCL12	HER2+	no_gene_module	no_scTYPER_call	no_inferCNV_call	no_CNA_value
CID3586_TAGGCATCAGACACTT	CID3586	6.43564	808	543	Endothelial	Endothelial CXCL12	Endothelial CXCL12	HER2+	no_gene_module	no_scTYPER_call	no_inferCNV_call	no_CNA_value
CID3586_TATCAGGAGAAACGAG	CID3586	11.6635	1569	894	Endothelial	Endothelial CXCL12	Endothelial CXCL12	HER2+	no_gene_module	no_scTYPER_call	no_inferCNV_call	no_CNA_value
CID3586_TCTTTCCAGTATCTCG	CID3586	3.64109	1538	898	Endothelial	Endothelial CXCL12	Endothelial CXCL12	HER2+	no_gene_module	no_scTYPER_call	no_inferCNV_call	no_CNA_value
CID3586_AAATGCCGTATTCGTG	CID3586	5.10332	3194	1349	Endothelial	Endothelial CXCL12	Endothelial CXCL12	HER2+	no_gene_module	no_scTYPER_call	no_inferCNV_call	no_CNA_value
CID3586_CTGCTGTAGATGGGTC	CID3586	7.3955	933	625	Endothelial	Endothelial CXCL12	Endothelial CXCL12	HER2+	no_gene_module	no_scTYPER_call	no_inferCNV_call	no_CNA_value
CID3586_AACACGTAGTGGGTTG	CID3586	2.62126	8927	2915	Endothelial	Endothelial CXCL12	Endothelial CXCL12	HER2+	no_gene_module	no_scTYPER_call	no_inferCNV_call	no_CNA_value
CID3586_AAGTCTGAGTACGCGA	CID3586	2.8474	5865	2056	Endothelial	Endothelial CXCL12	Endothelial CXCL12	HER2+	no_gene_module	no_scTYPER_call	no_inferCNV_call	no_CNA_value
CID3586_ACCAGTATCCGTCATC	CID3586	1.85747	2638	1203	Endothelial	Endothelial CXCL12	Endothelial CXCL12	HER2+	no_gene_module	no_scTYPER_call	no_inferCNV_call	no_CNA_value
CID3586_ACGATGTCAGCCTGTG	CID3586	15.1584	884	510	Endothelial	Endothelial CXCL12	Endothelial CXCL12	HER2+	no_gene_module	no_scTYPER_call	no_inferCNV_call	no_CNA_value
CID3586_ACTGAGTGTTGAGGTG	CID3586	1.99005	1809	1026	Endothelial	Endothelial CXCL12	Endothelial CXCL12	HER2+	no_gene_module	no_scTYPER_call	no_inferCNV_call	no_CNA_value
CID3586_AGGGTGAGTCTAGAGG	CID3586	8.41795	3053	1353	Endothelial	Endothelial CXCL12	Endothelial CXCL12	HER2+	no_gene_module	no_scTYPER_call	no_inferCNV_call	no_CNA_value
CID3586_CAGCAGCTCTAGCACA	CID3586	2.58363	3677	1666	Endothelial	Endothelial CXCL12	Endothelial CXCL12	HER2+	no_gene_module	no_scTYPER_call	no_inferCNV_call	no_CNA_value
CID3586_CAGCGACGTCGAGATG	CID3586	2.33856	16848	4340	Endothelial	Endothelial CXCL12	Endothelial CXCL12	HER2+	no_gene_module	no_scTYPER_call	no_inferCNV_call	no_CNA_value
CID3586_CATCCACGTGAAATCA	CID3586	4.74074	675	447	Endothelial	Endothelial CXCL12	Endothelial CXCL12	HER2+	no_gene_module	no_scTYPER_call	no_inferCNV_call	no_CNA_value
CID3586_CCTAGCTTCCAACCAA	CID3586	3.20186	4310	1683	Endothelial	Endothelial CXCL12	Endothelial CXCL12	HER2+	no_gene_module	no_scTYPER_call	no_inferCNV_call	no_CNA_value
CID3586_CGATGTATCCGCAGTG	CID3586	3.62963	1350	772	Endothelial	Endothelial CXCL12	Endothelial CXCL12	HER2+	no_gene_module	no_scTYPER_call	no_inferCNV_call	no_CNA_value
CID3586_CGGACGTTCTGGCGAC	CID3586	3.24298	14277	3906	Endothelial	Endothelial CXCL12	Endothelial CXCL12	HER2+	no_gene_module	no_scTYPER_call	no_inferCNV_call	no_CNA_value
CID3586_CTCTAATGTCCCGACA	CID3586	2.68928	9259	2736	Endothelial	Endothelial CXCL12	Endothelial CXCL12	HER2+	no_gene_module	no_scTYPER_call	no_inferCNV_call	no_CNA_value
CID3586_GAAACTCAGATATACG	CID3586	9.66638	7014	2451	Endothelial	Endothelial CXCL12	Endothelial CXCL12	HER2+	no_gene_module	no_scTYPER_call	no_inferCNV_call	no_CNA_value
CID3586_GAACCTATCCTATTCA	CID3586	4.85719	6197	2408	Endothelial	Endothelial CXCL12	Endothelial CXCL12	HER2+	no_gene_module	no_scTYPER_call	no_inferCNV_call	no_CNA_value
CID3586_GACTAACAGGAGTACC	CID3586	2.65395	5765	2107	Endothelial	Endothelial CXCL12	Endothelial CXCL12	HER2+	no_gene_module	no_scTYPER_call	no_inferCNV_call	no_CNA_value
CID3586_GGGACCTGTGACTCAT	CID3586	2.31376	7866	2691	Endothelial	Endothelial CXCL12	Endothelial CXCL12	HER2+	no_gene_module	no_scTYPER_call	no_inferCNV_call	no_CNA_value
CID3586_GTAGTCACATAGAAAC	CID3586	4.48968	3586	1472	Endothelial	Endothelial CXCL12	Endothelial CXCL12	HER2+	no_gene_module	no_scTYPER_call	no_inferCNV_call	no_CNA_value
CID3586_GTTCATTTCGTTTAGG	CID3586	0.733407	2727	1502	Endothelial	Endothelial CXCL12	Endothelial CXCL12	HER2+	no_gene_module	no_scTYPER_call	no_inferCNV_call	no_CNA_value
CID3586_TCATTTGTCCCAGGTG	CID3586	1.34697	4009	1447	Endothelial	Endothelial CXCL12	Endothelial CXCL12	HER2+	no_gene_module	no_scTYPER_call	no_inferCNV_call	no_CNA_value
CID3586_TGAGCATTCCAACCAA	CID3586	8.71824	5196	2004	Endothelial	Endothelial CXCL12	Endothelial CXCL12	HER2+	no_gene_module	no_scTYPER_call	no_inferCNV_call	no_CNA_value
CID3586_ACAGCTAAGACGCACA	CID3586	3.26895	673	442	CAFs	CAFs MSC iCAF-like	CAFs MSC iCAF-like s1	HER2+	no_gene_module	no_scTYPER_call	no_inferCNV_call	no_CNA_value
CID3586_ACAGCTATCGAGCCCA	CID3586	4.94905	687	460	CAFs	CAFs MSC iCAF-like	CAFs MSC iCAF-like s1	HER2+	no_gene_module	no_scTYPER_call	no_inferCNV_call	no_CNA_value
CID3586_ACATGGTTCTTACCTA	CID3586	4.16667	816	549	CAFs	CAFs MSC iCAF-like	CAFs MSC iCAF-like s1	HER2+	no_gene_module	no_scTYPER_call	no_inferCNV_call	no_CNA_value
CID3586_ACTGCTCCACGCGAAA	CID3586	3.59477	918	597	CAFs	CAFs MSC iCAF-like	CAFs MSC iCAF-like s1	HER2+	no_gene_module	no_scTYPER_call	no_inferCNV_call	no_CNA_value
CID3586_ACTGTCCTCACTTCAT	CID3586	2.47667	2786	1364	CAFs	CAFs MSC iCAF-like	CAFs MSC iCAF-like s1	HER2+	no_gene_module	no_scTYPER_call	no_inferCNV_call	no_CNA_value
CID3586_AGATTGCAGAGCTATA	CID3586	7.24638	828	578	CAFs	CAFs MSC iCAF-like	CAFs MSC iCAF-like s1	HER2+	no_gene_module	no_scTYPER_call	no_inferCNV_call	no_CNA_value
CID3586_AGCGGTCGTGACTCAT	CID3586	3.15041	984	636	CAFs	CAFs MSC iCAF-like	CAFs MSC iCAF-like s1	HER2+	no_gene_module	no_scTYPER_call	no_inferCNV_call	no_CNA_value
CID3586_ATGTGTGGTTATCCGA	CID3586	2.83861	3699	1313	CAFs	CAFs MSC iCAF-like	CAFs MSC iCAF-like s1	HER2+	no_gene_module	no_scTYPER_call	no_inferCNV_call	no_CNA_value
CID3586_ATTACTCAGTGCAAGC	CID3586	4.28062	841	537	CAFs	CAFs MSC iCAF-like	CAFs MSC iCAF-like s1	HER2+	no_gene_module	no_scTYPER_call	no_inferCNV_call	no_CNA_value
CID3586_CAACCAACAAGTCTGT	CID3586	2.5974	385	322	CAFs	CAFs MSC iCAF-like	CAFs MSC iCAF-like s1	HER2+	no_gene_module	no_scTYPER_call	no_inferCNV_call	no_CNA_value
CID3586_CACAGGCCATCCCATC	CID3586	2.13904	748	546	CAFs	CAFs MSC iCAF-like	CAFs MSC iCAF-like s1	HER2+	no_gene_module	no_scTYPER_call	no_inferCNV_call	no_CNA_value
CID3586_CAGGTGCTCAACACTG	CID3586	4.50132	1133	640	CAFs	CAFs MSC iCAF-like	CAFs MSC iCAF-like s1	HER2+	no_gene_module	no_scTYPER_call	no_inferCNV_call	no_CNA_value
CID3586_CATATGGTCATAGCAC	CID3586	2.91262	515	389	CAFs	CAFs MSC iCAF-like	CAFs MSC iCAF-like s1	HER2+	no_gene_module	no_scTYPER_call	no_inferCNV_call	no_CNA_value
CID3586_CATGGCGTCCATGAAC	CID3586	2.88066	1458	759	CAFs	CAFs MSC iCAF-like	CAFs MSC iCAF-like s1	HER2+	no_gene_module	no_scTYPER_call	no_inferCNV_call	no_CNA_value
CID3586_CGATTGACATAACCTG	CID3586	8.57339	1458	676	CAFs	CAFs MSC iCAF-like	CAFs MSC iCAF-like s1	HER2+	no_gene_module	no_scTYPER_call	no_inferCNV_call	no_CNA_value
CID3586_CGCTATCCAGGCTCAC	CID3586	6.50496	907	486	CAFs	CAFs MSC iCAF-like	CAFs MSC iCAF-like s1	HER2+	no_gene_module	no_scTYPER_call	no_inferCNV_call	no_CNA_value
CID3586_CGGAGTCTCCTGCAGG	CID3586	12.0079	508	343	CAFs	CAFs MSC iCAF-like	CAFs MSC iCAF-like s1	HER2+	no_gene_module	no_scTYPER_call	no_inferCNV_call	no_CNA_value
CID3586_CTAAGACTCCAATGGT	CID3586	1.40056	3927	1294	CAFs	CAFs MSC iCAF-like	CAFs MSC iCAF-like s1	HER2+	no_gene_module	no_scTYPER_call	no_inferCNV_call	no_CNA_value
CID3586_CTAATGGGTCGCGAAA	CID3586	5.2459	610	402	CAFs	CAFs MSC iCAF-like	CAFs MSC iCAF-like s1	HER2+	no_gene_module	no_scTYPER_call	no_inferCNV_call	no_CNA_value
CID3586_CTCTGGTAGGTGTTAA	CID3586	2.25362	2973	1157	CAFs	CAFs MSC iCAF-like	CAFs MSC iCAF-like s1	HER2+	no_gene_module	no_scTYPER_call	no_inferCNV_call	no_CNA_value
CID3586_CTGATAGGTGTTTGGT	CID3586	3.14119	5985	1773	CAFs	CAFs MSC iCAF-like	CAFs MSC iCAF-like s1	HER2+	no_gene_module	no_scTYPER_call	no_inferCNV_call	no_CNA_value
CID3586_GATCTAGAGTGCGATG	CID3586	1.95713	1073	716	CAFs	CAFs MSC iCAF-like	CAFs MSC iCAF-like s1	HER2+	no_gene_module	no_scTYPER_call	no_inferCNV_call	no_CNA_value
CID3586_GCGCGATAGCCACCTG	CID3586	3.39943	706	418	CAFs	CAFs MSC iCAF-like	CAFs MSC iCAF-like s1	HER2+	no_gene_module	no_scTYPER_call	no_inferCNV_call	no_CNA_value
CID3586_GGACATTAGCGTAGTG	CID3586	5.05415	277	227	CAFs	CAFs MSC iCAF-like	CAFs MSC iCAF-like s1	HER2+	no_gene_module	no_scTYPER_call	no_inferCNV_call	no_CNA_value
CID3586_GGTATTGTCAACCATG	CID3586	4.8913	552	386	CAFs	CAFs MSC iCAF-like	CAFs MSC iCAF-like s1	HER2+	no_gene_module	no_scTYPER_call	no_inferCNV_call	no_CNA_value
CID3586_GTGAAGGGTAAGTGTA	CID3586	6.31277	1394	775	CAFs	CAFs MSC iCAF-like	CAFs MSC iCAF-like s1	HER2+	no_gene_module	no_scTYPER_call	no_inferCNV_call	no_CNA_value
CID3586_TCATTACAGCTGTTCA	CID3586	9.02004	898	502	CAFs	CAFs MSC iCAF-like	CAFs MSC iCAF-like s1	HER2+	no_gene_module	no_scTYPER_call	no_inferCNV_call	no_CNA_value
CID3586_TCTTCGGTCATTCACT	CID3586	2.85111	947	608	CAFs	CAFs MSC iCAF-like	CAFs MSC iCAF-like s1	HER2+	no_gene_module	no_scTYPER_call	no_inferCNV_call	no_CNA_value
CID3586_TGCGTGGCACGGCTAC	CID3586	1.47528	2508	1159	CAFs	CAFs MSC iCAF-like	CAFs MSC iCAF-like s1	HER2+	no_gene_module	no_scTYPER_call	no_inferCNV_call	no_CNA_value
CID3586_TTCGGTCAGAATCTCC	CID3586	2.45787	1424	852	CAFs	CAFs MSC iCAF-like	CAFs MSC iCAF-like s1	HER2+	no_gene_module	no_scTYPER_call	no_inferCNV_call	no_CNA_value
CID3586_TTGGAACTCCTGCAGG	CID3586	2.33081	4891	1510	CAFs	CAFs MSC iCAF-like	CAFs MSC iCAF-like s1	HER2+	no_gene_module	no_scTYPER_call	no_inferCNV_call	no_CNA_value
CID3586_ATAGACCTCGTTACGA	CID3586	2.74078	3904	1375	CAFs	CAFs MSC iCAF-like	CAFs MSC iCAF-like s1	HER2+	no_gene_module	no_scTYPER_call	no_inferCNV_call	no_CNA_value
CID3586_CAACCTCCACAGGCCT	CID3586	1.98639	5437	1459	CAFs	CAFs MSC iCAF-like	CAFs MSC iCAF-like s1	HER2+	no_gene_module	no_scTYPER_call	no_inferCNV_call	no_CNA_value
CID3586_CACCTTGAGTGATCGG	CID3586	2.57787	2793	1171	CAFs	CAFs MSC iCAF-like	CAFs MSC iCAF-like s1	HER2+	no_gene_module	no_scTYPER_call	no_inferCNV_call	no_CNA_value
CID3586_CATTCGCTCCGCTGTT	CID3586	1.46277	3760	1297	CAFs	CAFs MSC iCAF-like	CAFs MSC iCAF-like s1	HER2+	no_gene_module	no_scTYPER_call	no_inferCNV_call	no_CNA_value
CID3586_CGACTTCAGGCAATTA	CID3586	3.62854	1626	697	CAFs	CAFs MSC iCAF-like	CAFs MSC iCAF-like s1	HER2+	no_gene_module	no_scTYPER_call	no_inferCNV_call	no_CNA_value
CID3586_CGTAGCGTCGCAAGCC	CID3586	0.757576	924	447	CAFs	CAFs MSC iCAF-like	CAFs MSC iCAF-like s1	HER2+	no_gene_module	no_scTYPER_call	no_inferCNV_call	no_CNA_value
CID3586_CGTAGGCTCAGCACAT	CID3586	2.28377	2058	718	CAFs	CAFs MSC iCAF-like	CAFs MSC iCAF-like s1	HER2+	no_gene_module	no_scTYPER_call	no_inferCNV_call	no_CNA_value
CID3586_CGTCTACGTTACGCGC	CID3586	2.95036	2881	1065	CAFs	CAFs MSC iCAF-like	CAFs MSC iCAF-like s1	HER2+	no_gene_module	no_scTYPER_call	no_inferCNV_call	no_CNA_value
CID3586_CTGATCCTCGGAATCT	CID3586	3.23077	3900	1183	CAFs	CAFs MSC iCAF-like	CAFs MSC iCAF-like s1	HER2+	no_gene_module	no_scTYPER_call	no_inferCNV_call	no_CNA_value
CID3586_GAACATCCAGGCGATA	CID3586	1.94903	4002	1397	CAFs	CAFs MSC iCAF-like	CAFs MSC iCAF-like s1	HER2+	no_gene_module	no_scTYPER_call	no_inferCNV_call	no_CNA_value
CID3586_GAACATCCATGAGCGA	CID3586	3.03648	4413	1424	CAFs	CAFs MSC iCAF-like	CAFs MSC iCAF-like s1	HER2+	no_gene_module	no_scTYPER_call	no_inferCNV_call	no_CNA_value
CID3586_GAACCTAGTCGCGTGT	CID3586	1.76843	5372	1573	CAFs	CAFs MSC iCAF-like	CAFs MSC iCAF-like s1	HER2+	no_gene_module	no_scTYPER_call	no_inferCNV_call	no_CNA_value
CID3586_GAGTCCGTCAGTGCAT	CID3586	3.27988	1372	650	CAFs	CAFs MSC iCAF-like	CAFs MSC iCAF-like s1	HER2+	no_gene_module	no_scTYPER_call	no_inferCNV_call	no_CNA_value
CID3586_GATCGCGGTCGAAAGC	CID3586	3.77698	2224	829	CAFs	CAFs MSC iCAF-like	CAFs MSC iCAF-like s1	HER2+	no_gene_module	no_scTYPER_call	no_inferCNV_call	no_CNA_value
CID3586_GATGAAAAGTGGCACA	CID3586	3.61146	1606	678	CAFs	CAFs MSC iCAF-like	CAFs MSC iCAF-like s1	HER2+	no_gene_module	no_scTYPER_call	no_inferCNV_call	no_CNA_value
CID3586_GATGCTAAGCGATTCT	CID3586	2.86145	3984	1336	CAFs	CAFs MSC iCAF-like	CAFs MSC iCAF-like s1	HER2+	no_gene_module	no_scTYPER_call	no_inferCNV_call	no_CNA_value
CID3586_GATTCAGCATACCATG	CID3586	3.16716	3410	1228	CAFs	CAFs MSC iCAF-like	CAFs MSC iCAF-like s1	HER2+	no_gene_module	no_scTYPER_call	no_inferCNV_call	no_CNA_value
CID3586_GGAATAACACGGCCAT	CID3586	3.56186	3734	1311	CAFs	CAFs MSC iCAF-like	CAFs MSC iCAF-like s1	HER2+	no_gene_module	no_scTYPER_call	no_inferCNV_call	no_CNA_value
CID3586_GGCCGATTCGGTCTAA	CID3586	2.90044	3827	1309	CAFs	CAFs MSC iCAF-like	CAFs MSC iCAF-like s1	HER2+	no_gene_module	no_scTYPER_call	no_inferCNV_call	no_CNA_value
CID3586_GTGTGCGAGGATGGTC	CID3586	6.72683	1219	550	CAFs	CAFs MSC iCAF-like	CAFs MSC iCAF-like s1	HER2+	no_gene_module	no_scTYPER_call	no_inferCNV_call	no_CNA_value
CID3586_GTGTGCGAGTAAGTAC	CID3586	4.10463	2485	1014	CAFs	CAFs MSC iCAF-like	CAFs MSC iCAF-like s1	HER2+	no_gene_module	no_scTYPER_call	no_inferCNV_call	no_CNA_value
CID3586_GTTCATTCATCCCACT	CID3586	2.22263	5399	1493	CAFs	CAFs MSC iCAF-like	CAFs MSC iCAF-like s1	HER2+	no_gene_module	no_scTYPER_call	no_inferCNV_call	no_CNA_value
CID3586_TAAGAGAGTGAGGGTT	CID3586	2.39817	2627	891	CAFs	CAFs MSC iCAF-like	CAFs MSC iCAF-like s1	HER2+	no_gene_module	no_scTYPER_call	no_inferCNV_call	no_CNA_value
CID3586_TACTCATTCTTCAACT	CID3586	2.98904	3011	1179	CAFs	CAFs MSC iCAF-like	CAFs MSC iCAF-like s1	HER2+	no_gene_module	no_scTYPER_call	no_inferCNV_call	no_CNA_value
CID3586_TCATTTGTCGAGCCCA	CID3586	2.90595	5093	1506	CAFs	CAFs MSC iCAF-like	CAFs MSC iCAF-like s1	HER2+	no_gene_module	no_scTYPER_call	no_inferCNV_call	no_CNA_value
CID3586_TCCCGATAGCAGACTG	CID3586	2.9724	3768	1260	CAFs	CAFs MSC iCAF-like	CAFs MSC iCAF-like s1	HER2+	no_gene_module	no_scTYPER_call	no_inferCNV_call	no_CNA_value
CID3586_TGACAACTCTACTCAT	CID3586	1.77039	1864	765	CAFs	CAFs MSC iCAF-like	CAFs MSC iCAF-like s1	HER2+	no_gene_module	no_scTYPER_call	no_inferCNV_call	no_CNA_value
CID3586_TTCGGTCTCCGCTGTT	CID3586	3.10448	1675	802	CAFs	CAFs MSC iCAF-like	CAFs MSC iCAF-like s1	HER2+	no_gene_module	no_scTYPER_call	no_inferCNV_call	no_CNA_value
CID3586_ACAGCTACAGGACCCT	CID3586	7.74749	697	413	CAFs	CAFs MSC iCAF-like	CAFs MSC iCAF-like s2	HER2+	no_gene_module	no_scTYPER_call	no_inferCNV_call	no_CNA_value
CID3586_ACATGGTGTCCCTACT	CID3586	2.30673	1604	855	CAFs	CAFs MSC iCAF-like	CAFs MSC iCAF-like s2	HER2+	no_gene_module	no_scTYPER_call	no_inferCNV_call	no_CNA_value
CID3586_ACTATCTAGGTGCTTT	CID3586	11.3456	379	201	CAFs	CAFs MSC iCAF-like	CAFs MSC iCAF-like s2	HER2+	no_gene_module	no_scTYPER_call	no_inferCNV_call	no_CNA_value
CID3586_ATTTCTGCAACGATGG	CID3586	3.42205	789	490	CAFs	CAFs MSC iCAF-like	CAFs MSC iCAF-like s2	HER2+	no_gene_module	no_scTYPER_call	no_inferCNV_call	no_CNA_value
CID3586_CTCGTCACACATTAGC	CID3586	4.7546	652	406	CAFs	CAFs MSC iCAF-like	CAFs MSC iCAF-like s2	HER2+	no_gene_module	no_scTYPER_call	no_inferCNV_call	no_CNA_value
CID3586_CTGATAGCATTGAGCT	CID3586	7.45763	295	233	CAFs	CAFs MSC iCAF-like	CAFs MSC iCAF-like s2	HER2+	no_gene_module	no_scTYPER_call	no_inferCNV_call	no_CNA_value
CID3586_CTTGGCTGTTCTCATT	CID3586	4.23729	1534	742	CAFs	CAFs MSC iCAF-like	CAFs MSC iCAF-like s2	HER2+	no_gene_module	no_scTYPER_call	no_inferCNV_call	no_CNA_value
CID3586_GAATGAAGTCTCCACT	CID3586	1.10236	635	451	CAFs	CAFs MSC iCAF-like	CAFs MSC iCAF-like s2	HER2+	no_gene_module	no_scTYPER_call	no_inferCNV_call	no_CNA_value
CID3586_GGAAAGCAGTCGATAA	CID3586	3.30393	6689	1983	CAFs	CAFs MSC iCAF-like	CAFs MSC iCAF-like s2	HER2+	no_gene_module	no_scTYPER_call	no_inferCNV_call	no_CNA_value
CID3586_GGACATTGTCATCCCT	CID3586	15.2753	563	299	CAFs	CAFs MSC iCAF-like	CAFs MSC iCAF-like s2	HER2+	no_gene_module	no_scTYPER_call	no_inferCNV_call	no_CNA_value
CID3586_GGGTTGCAGATATACG	CID3586	2.83189	5544	2155	CAFs	CAFs MSC iCAF-like	CAFs MSC iCAF-like s2	HER2+	no_gene_module	no_scTYPER_call	no_inferCNV_call	no_CNA_value
CID3586_GTCGTAAAGATCACGG	CID3586	1.28205	2028	698	CAFs	CAFs MSC iCAF-like	CAFs MSC iCAF-like s2	HER2+	no_gene_module	no_scTYPER_call	no_inferCNV_call	no_CNA_value
CID3586_GACGCGTTCACTATTC	CID3586	2.72401	1395	706	CAFs	CAFs MSC iCAF-like	CAFs MSC iCAF-like s2	HER2+	no_gene_module	no_scTYPER_call	no_inferCNV_call	no_CNA_value
CID3586_TCTGAGACACTTAAGC	CID3586	16.6827	1037	559	CAFs	CAFs MSC iCAF-like	CAFs MSC iCAF-like s2	HER2+	no_gene_module	no_scTYPER_call	no_inferCNV_call	no_CNA_value
CID3586_AAACCTGGTAAATGAC	CID3586	2.53214	7622	2222	CAFs	CAFs MSC iCAF-like	CAFs MSC iCAF-like s2	HER2+	no_gene_module	no_scTYPER_call	no_inferCNV_call	no_CNA_value
CID3586_AAAGATGCACCGTTGG	CID3586	10.4967	1067	465	CAFs	CAFs MSC iCAF-like	CAFs MSC iCAF-like s2	HER2+	no_gene_module	no_scTYPER_call	no_inferCNV_call	no_CNA_value
CID3586_ACGCAGCAGCCTATGT	CID3586	2.51799	1112	501	CAFs	CAFs MSC iCAF-like	CAFs MSC iCAF-like s2	HER2+	no_gene_module	no_scTYPER_call	no_inferCNV_call	no_CNA_value
CID3586_ACGCCGAAGCTGCCCA	CID3586	1.27551	784	406	CAFs	CAFs MSC iCAF-like	CAFs MSC iCAF-like s2	HER2+	no_gene_module	no_scTYPER_call	no_inferCNV_call	no_CNA_value
CID3586_ACTGAACCAAGAAGAG	CID3586	7.48	2500	838	CAFs	CAFs MSC iCAF-like	CAFs MSC iCAF-like s2	HER2+	no_gene_module	no_scTYPER_call	no_inferCNV_call	no_CNA_value
CID3586_AGCATACGTTGGTGGA	CID3586	2.71444	2763	892	CAFs	CAFs MSC iCAF-like	CAFs MSC iCAF-like s2	HER2+	no_gene_module	no_scTYPER_call	no_inferCNV_call	no_CNA_value
CID3586_AGGTCATGTAGCACGA	CID3586	2.28137	526	335	CAFs	CAFs MSC iCAF-like	CAFs MSC iCAF-like s2	HER2+	no_gene_module	no_scTYPER_call	no_inferCNV_call	no_CNA_value
CID3586_ATAACGCCAGCTTAAC	CID3586	1.23301	3974	1334	CAFs	CAFs MSC iCAF-like	CAFs MSC iCAF-like s2	HER2+	no_gene_module	no_scTYPER_call	no_inferCNV_call	no_CNA_value
CID3586_ATAGACCTCTTCGGTC	CID3586	7.78325	2030	748	CAFs	CAFs MSC iCAF-like	CAFs MSC iCAF-like s2	HER2+	no_gene_module	no_scTYPER_call	no_inferCNV_call	no_CNA_value
CID3586_ATGTGTGGTAAATGTG	CID3586	1.63221	919	513	CAFs	CAFs MSC iCAF-like	CAFs MSC iCAF-like s2	HER2+	no_gene_module	no_scTYPER_call	no_inferCNV_call	no_CNA_value
CID3586_ATTACTCTCTGCCAGG	CID3586	3.8048	1209	537	CAFs	CAFs MSC iCAF-like	CAFs MSC iCAF-like s2	HER2+	no_gene_module	no_scTYPER_call	no_inferCNV_call	no_CNA_value
CID3586_ATTATCCTCGCCATAA	CID3586	2.59067	772	391	CAFs	CAFs MSC iCAF-like	CAFs MSC iCAF-like s2	HER2+	no_gene_module	no_scTYPER_call	no_inferCNV_call	no_CNA_value
CID3586_CACAAACTCTATCCCG	CID3586	2.93644	4972	1578	CAFs	CAFs MSC iCAF-like	CAFs MSC iCAF-like s2	HER2+	no_gene_module	no_scTYPER_call	no_inferCNV_call	no_CNA_value
CID3586_CACCACTCAACGCACC	CID3586	1.15562	1298	588	CAFs	CAFs MSC iCAF-like	CAFs MSC iCAF-like s2	HER2+	no_gene_module	no_scTYPER_call	no_inferCNV_call	no_CNA_value
CID3586_CAGAATCCAGGACGTA	CID3586	1.9685	4064	1359	CAFs	CAFs MSC iCAF-like	CAFs MSC iCAF-like s2	HER2+	no_gene_module	no_scTYPER_call	no_inferCNV_call	no_CNA_value
CID3586_CAGAGAGGTCGATTGT	CID3586	6.35042	1307	602	CAFs	CAFs MSC iCAF-like	CAFs MSC iCAF-like s2	HER2+	no_gene_module	no_scTYPER_call	no_inferCNV_call	no_CNA_value
CID3586_CATCAGACAATGGACG	CID3586	5.09939	1157	461	CAFs	CAFs MSC iCAF-like	CAFs MSC iCAF-like s2	HER2+	no_gene_module	no_scTYPER_call	no_inferCNV_call	no_CNA_value
CID3586_CATTCGCTCAAGAAGT	CID3586	5.1057	2507	845	CAFs	CAFs MSC iCAF-like	CAFs MSC iCAF-like s2	HER2+	no_gene_module	no_scTYPER_call	no_inferCNV_call	no_CNA_value
CID3586_CCCAGTTAGTGTCTCA	CID3586	2.87037	1080	458	CAFs	CAFs MSC iCAF-like	CAFs MSC iCAF-like s2	HER2+	no_gene_module	no_scTYPER_call	no_inferCNV_call	no_CNA_value
CID3586_CCGTACTCATCGTCGG	CID3586	9.43542	1293	578	CAFs	CAFs MSC iCAF-like	CAFs MSC iCAF-like s2	HER2+	no_gene_module	no_scTYPER_call	no_inferCNV_call	no_CNA_value
CID3586_CCTATTAAGTACGTAA	CID3586	4.62107	541	323	CAFs	CAFs MSC iCAF-like	CAFs MSC iCAF-like s2	HER2+	no_gene_module	no_scTYPER_call	no_inferCNV_call	no_CNA_value
CID3586_CCTATTATCTAGCACA	CID3586	2.79515	2719	1111	CAFs	CAFs MSC iCAF-like	CAFs MSC iCAF-like s2	HER2+	no_gene_module	no_scTYPER_call	no_inferCNV_call	no_CNA_value
CID3586_CCTTTCTTCCGCGCAA	CID3586	14.4094	1617	720	CAFs	CAFs MSC iCAF-like	CAFs MSC iCAF-like s2	HER2+	no_gene_module	no_scTYPER_call	no_inferCNV_call	no_CNA_value
CID3586_CGAACATCAAGGTTTC	CID3586	3.83807	3804	1366	CAFs	CAFs MSC iCAF-like	CAFs MSC iCAF-like s2	HER2+	no_gene_module	no_scTYPER_call	no_inferCNV_call	no_CNA_value
CID3586_CGATGTAGTTGCGCAC	CID3586	1.72414	2378	863	CAFs	CAFs MSC iCAF-like	CAFs MSC iCAF-like s2	HER2+	no_gene_module	no_scTYPER_call	no_inferCNV_call	no_CNA_value
CID3586_CGTTGGGGTGTGTGCC	CID3586	2.19665	4780	1503	CAFs	CAFs MSC iCAF-like	CAFs MSC iCAF-like s2	HER2+	no_gene_module	no_scTYPER_call	no_inferCNV_call	no_CNA_value
CID3586_CTACGTCAGATCCTGT	CID3586	1.94762	4467	1477	CAFs	CAFs MSC iCAF-like	CAFs MSC iCAF-like s2	HER2+	no_gene_module	no_scTYPER_call	no_inferCNV_call	no_CNA_value
CID3586_CTAGTGAAGCCTATGT	CID3586	15.7534	730	386	CAFs	CAFs MSC iCAF-like	CAFs MSC iCAF-like s2	HER2+	no_gene_module	no_scTYPER_call	no_inferCNV_call	no_CNA_value
CID3586_CTCATTACACATCCAA	CID3586	17.6621	1172	498	CAFs	CAFs MSC iCAF-like	CAFs MSC iCAF-like s2	HER2+	no_gene_module	no_scTYPER_call	no_inferCNV_call	no_CNA_value
CID3586_CTGAAACTCAACCATG	CID3586	10.058	517	295	CAFs	CAFs MSC iCAF-like	CAFs MSC iCAF-like s2	HER2+	no_gene_module	no_scTYPER_call	no_inferCNV_call	no_CNA_value
CID3586_CTGATAGAGGCAAAGA	CID3586	9.31937	955	476	CAFs	CAFs MSC iCAF-like	CAFs MSC iCAF-like s2	HER2+	no_gene_module	no_scTYPER_call	no_inferCNV_call	no_CNA_value
CID3586_CTGCCTAGTACATCCA	CID3586	4.53446	1654	673	CAFs	CAFs MSC iCAF-like	CAFs MSC iCAF-like s2	HER2+	no_gene_module	no_scTYPER_call	no_inferCNV_call	no_CNA_value
CID3586_CTGTGCTAGGACATTA	CID3586	2.93062	1672	703	CAFs	CAFs MSC iCAF-like	CAFs MSC iCAF-like s2	HER2+	no_gene_module	no_scTYPER_call	no_inferCNV_call	no_CNA_value
CID3586_CTTGGCTTCGCAGGCT	CID3586	9.16179	1026	504	CAFs	CAFs MSC iCAF-like	CAFs MSC iCAF-like s2	HER2+	no_gene_module	no_scTYPER_call	no_inferCNV_call	no_CNA_value
CID3586_GATCGCGCATCACAAC	CID3586	12.7095	716	454	CAFs	CAFs MSC iCAF-like	CAFs MSC iCAF-like s2	HER2+	no_gene_module	no_scTYPER_call	no_inferCNV_call	no_CNA_value
CID3586_GATCTAGAGGCTAGCA	CID3586	2.44527	3517	1161	CAFs	CAFs MSC iCAF-like	CAFs MSC iCAF-like s2	HER2+	no_gene_module	no_scTYPER_call	no_inferCNV_call	no_CNA_value
CID3586_GATCTAGAGGGCTTGA	CID3586	6.88073	872	421	CAFs	CAFs MSC iCAF-like	CAFs MSC iCAF-like s2	HER2+	no_gene_module	no_scTYPER_call	no_inferCNV_call	no_CNA_value
CID3586_GCACATATCCGAAGAG	CID3586	2.68097	3730	1300	CAFs	CAFs MSC iCAF-like	CAFs MSC iCAF-like s2	HER2+	no_gene_module	no_scTYPER_call	no_inferCNV_call	no_CNA_value
CID3586_GCACTCTCAAGCCGTC	CID3586	5.02232	1792	708	CAFs	CAFs MSC iCAF-like	CAFs MSC iCAF-like s2	HER2+	no_gene_module	no_scTYPER_call	no_inferCNV_call	no_CNA_value
CID3586_GCATGCGAGTCTCCTC	CID3586	1.9673	7218	2132	CAFs	CAFs MSC iCAF-like	CAFs MSC iCAF-like s2	HER2+	no_gene_module	no_scTYPER_call	no_inferCNV_call	no_CNA_value
CID3586_GCGCAGTCATCCCACT	CID3586	3.72699	2227	780	CAFs	CAFs MSC iCAF-like	CAFs MSC iCAF-like s2	HER2+	no_gene_module	no_scTYPER_call	no_inferCNV_call	no_CNA_value
CID3586_GCGCAGTGTCCCTTGT	CID3586	3.30598	4265	1167	CAFs	CAFs MSC iCAF-like	CAFs MSC iCAF-like s2	HER2+	no_gene_module	no_scTYPER_call	no_inferCNV_call	no_CNA_value
CID3586_GCGCCAATCGGAGCAA	CID3586	8.12408	677	372	CAFs	CAFs MSC iCAF-like	CAFs MSC iCAF-like s2	HER2+	no_gene_module	no_scTYPER_call	no_inferCNV_call	no_CNA_value
CID3586_GCGGGTTTCAGCTCTC	CID3586	9.97662	1283	634	CAFs	CAFs MSC iCAF-like	CAFs MSC iCAF-like s2	HER2+	no_gene_module	no_scTYPER_call	no_inferCNV_call	no_CNA_value
CID3586_GCTCTGTTCCGTTGCT	CID3586	3.29812	3881	1209	CAFs	CAFs MSC iCAF-like	CAFs MSC iCAF-like s2	HER2+	no_gene_module	no_scTYPER_call	no_inferCNV_call	no_CNA_value
CID3586_GGCAATTCATGTTGAC	CID3586	5.45455	990	569	CAFs	CAFs MSC iCAF-like	CAFs MSC iCAF-like s2	HER2+	no_gene_module	no_scTYPER_call	no_inferCNV_call	no_CNA_value
CID3586_GGCGACTTCACTATTC	CID3586	8.24074	1080	509	CAFs	CAFs MSC iCAF-like	CAFs MSC iCAF-like s2	HER2+	no_gene_module	no_scTYPER_call	no_inferCNV_call	no_CNA_value
CID3586_GGCGTGTTCCACGTTC	CID3586	4.18782	788	373	CAFs	CAFs MSC iCAF-like	CAFs MSC iCAF-like s2	HER2+	no_gene_module	no_scTYPER_call	no_inferCNV_call	no_CNA_value
CID3586_GGGCACTAGAATTCCC	CID3586	10.1708	2576	934	CAFs	CAFs MSC iCAF-like	CAFs MSC iCAF-like s2	HER2+	no_gene_module	no_scTYPER_call	no_inferCNV_call	no_CNA_value
CID3586_GGGCATCTCCAATGGT	CID3586	0.799733	3001	1131	CAFs	CAFs MSC iCAF-like	CAFs MSC iCAF-like s2	HER2+	no_gene_module	no_scTYPER_call	no_inferCNV_call	no_CNA_value
CID3586_GGTGAAGCAAACCCAT	CID3586	2.16162	3007	884	CAFs	CAFs MSC iCAF-like	CAFs MSC iCAF-like s2	HER2+	no_gene_module	no_scTYPER_call	no_inferCNV_call	no_CNA_value
CID3586_GTCACGGAGAACTGTA	CID3586	6.25	1056	516	CAFs	CAFs MSC iCAF-like	CAFs MSC iCAF-like s2	HER2+	no_gene_module	no_scTYPER_call	no_inferCNV_call	no_CNA_value
CID3586_GTGCGGTTCCAGGGCT	CID3586	5.42206	1623	687	CAFs	CAFs MSC iCAF-like	CAFs MSC iCAF-like s2	HER2+	no_gene_module	no_scTYPER_call	no_inferCNV_call	no_CNA_value
CID3586_GTGTGCGGTCGCGTGT	CID3586	3.49181	5069	1616	CAFs	CAFs MSC iCAF-like	CAFs MSC iCAF-like s2	HER2+	no_gene_module	no_scTYPER_call	no_inferCNV_call	no_CNA_value
CID3586_TACCTTACATCGTCGG	CID3586	10.0182	1098	510	CAFs	CAFs MSC iCAF-like	CAFs MSC iCAF-like s2	HER2+	no_gene_module	no_scTYPER_call	no_inferCNV_call	no_CNA_value
CID3586_TCATTTGCATTAGGCT	CID3586	4.03204	3621	1313	CAFs	CAFs MSC iCAF-like	CAFs MSC iCAF-like s2	HER2+	no_gene_module	no_scTYPER_call	no_inferCNV_call	no_CNA_value
CID3586_TCGGTAAGTAGCGTAG	CID3586	2.16062	2453	971	CAFs	CAFs MSC iCAF-like	CAFs MSC iCAF-like s2	HER2+	no_gene_module	no_scTYPER_call	no_inferCNV_call	no_CNA_value
CID3586_TCGTACCAGCACACAG	CID3586	3.12121	3300	1150	CAFs	CAFs MSC iCAF-like	CAFs MSC iCAF-like s2	HER2+	no_gene_module	no_scTYPER_call	no_inferCNV_call	no_CNA_value
CID3586_TCTCATAAGCGTGAAC	CID3586	2.37087	1181	500	CAFs	CAFs MSC iCAF-like	CAFs MSC iCAF-like s2	HER2+	no_gene_module	no_scTYPER_call	no_inferCNV_call	no_CNA_value
CID3586_TCTTTCCAGAGGTAGA	CID3586	2.13493	10539	2813	CAFs	CAFs MSC iCAF-like	CAFs MSC iCAF-like s2	HER2+	no_gene_module	no_scTYPER_call	no_inferCNV_call	no_CNA_value
CID3586_TGAAAGAAGGTAGCTG	CID3586	5.5102	980	471	CAFs	CAFs MSC iCAF-like	CAFs MSC iCAF-like s2	HER2+	no_gene_module	no_scTYPER_call	no_inferCNV_call	no_CNA_value
CID3586_TGAGCCGAGATCTGCT	CID3586	1.39266	2944	974	CAFs	CAFs MSC iCAF-like	CAFs MSC iCAF-like s2	HER2+	no_gene_module	no_scTYPER_call	no_inferCNV_call	no_CNA_value
CID3586_TGCTGCTAGTCAAGCG	CID3586	2.28091	833	492	CAFs	CAFs MSC iCAF-like	CAFs MSC iCAF-like s2	HER2+	no_gene_module	no_scTYPER_call	no_inferCNV_call	no_CNA_value
CID3586_TGGCTGGGTCTAGTGT	CID3586	1.53061	980	527	CAFs	CAFs MSC iCAF-like	CAFs MSC iCAF-like s2	HER2+	no_gene_module	no_scTYPER_call	no_inferCNV_call	no_CNA_value
CID3586_TGGTTAGTCCGAAGAG	CID3586	8.22408	839	396	CAFs	CAFs MSC iCAF-like	CAFs MSC iCAF-like s2	HER2+	no_gene_module	no_scTYPER_call	no_inferCNV_call	no_CNA_value
CID3586_TGTCCCAAGCTACCTA	CID3586	2.51609	1709	743	CAFs	CAFs MSC iCAF-like	CAFs MSC iCAF-like s2	HER2+	no_gene_module	no_scTYPER_call	no_inferCNV_call	no_CNA_value
CID3586_TTAACTCAGATCCCAT	CID3586	17.0507	868	411	CAFs	CAFs MSC iCAF-like	CAFs MSC iCAF-like s2	HER2+	no_gene_module	no_scTYPER_call	no_inferCNV_call	no_CNA_value
CID3586_TTCTCCTAGGGATGGG	CID3586	12.2059	680	380	CAFs	CAFs MSC iCAF-like	CAFs MSC iCAF-like s2	HER2+	no_gene_module	no_scTYPER_call	no_inferCNV_call	no_CNA_value
CID3586_TTTACTGCACCAGTTA	CID3586	2.22861	1391	543	CAFs	CAFs MSC iCAF-like	CAFs MSC iCAF-like s2	HER2+	no_gene_module	no_scTYPER_call	no_inferCNV_call	no_CNA_value
CID3586_TTTGGTTCATGCTGGC	CID3586	7.87879	1320	558	CAFs	CAFs MSC iCAF-like	CAFs MSC iCAF-like s2	HER2+	no_gene_module	no_scTYPER_call	no_inferCNV_call	no_CNA_value
CID3586_CTAGTGAAGTGGACGT	CID3586	0.84317	593	364	CAFs	CAFs MSC iCAF-like	CAFs MSC iCAF-like s2	HER2+	no_gene_module	no_scTYPER_call	no_inferCNV_call	no_CNA_value
CID3586_AAGACCTAGCTATGCT	CID3586	5.15859	2869	934	CAFs	CAFs MSC iCAF-like	CAFs MSC iCAF-like s2	HER2+	no_gene_module	no_scTYPER_call	no_inferCNV_call	no_CNA_value
CID3586_GCGCCAAAGGGAAACA	CID3586	1.84638	1354	719	CAFs	CAFs MSC iCAF-like	CAFs MSC iCAF-like s2	HER2+	no_gene_module	no_scTYPER_call	no_inferCNV_call	no_CNA_value
CID3586_GATTCAGGTTCCACAA	CID3586	2.93686	681	302	CAFs	CAFs myCAF-like	CAFs Transitioning s3	HER2+	no_gene_module	no_scTYPER_call	no_inferCNV_call	no_CNA_value
CID3586_TAGTTGGCACACAGAG	CID3586	3.84511	3693	1682	CAFs	CAFs myCAF-like	CAFs Transitioning s3	HER2+	no_gene_module	no_scTYPER_call	no_inferCNV_call	no_CNA_value
CID3586_GATGAGGCAATGGATA	CID3586	4.06977	688	462	CAFs	CAFs myCAF-like	CAFs Transitioning s3	HER2+	no_gene_module	no_scTYPER_call	no_inferCNV_call	no_CNA_value
CID3586_TTGGAACTCGTCCAGG	CID3586	18.588	1119	519	CAFs	CAFs myCAF-like	CAFs Transitioning s3	HER2+	no_gene_module	no_scTYPER_call	no_inferCNV_call	no_CNA_value
CID3586_ACTATCTTCAGCGACC	CID3586	2.74033	6824	1949	CAFs	CAFs myCAF-like	CAFs Transitioning s3	HER2+	no_gene_module	no_scTYPER_call	no_inferCNV_call	no_CNA_value
CID3586_GCGCGATCAACACCCG	CID3586	1.82063	4449	1425	CAFs	CAFs myCAF-like	CAFs Transitioning s3	HER2+	no_gene_module	no_scTYPER_call	no_inferCNV_call	no_CNA_value
CID3586_TGGTTAGGTTGCGTTA	CID3586	3.92781	942	650	CAFs	CAFs myCAF-like	CAFs myCAF like s4	HER2+	no_gene_module	no_scTYPER_call	no_inferCNV_call	no_CNA_value
CID3586_GTGCATATCTACCAGA	CID3586	2.7088	4873	1556	CAFs	CAFs myCAF-like	CAFs myCAF like s4	HER2+	no_gene_module	no_scTYPER_call	no_inferCNV_call	no_CNA_value
CID3586_TCGCGTTGTGATGTGG	CID3586	3.69379	5604	1787	CAFs	CAFs myCAF-like	CAFs myCAF like s4	HER2+	no_gene_module	no_scTYPER_call	no_inferCNV_call	no_CNA_value
CID3586_TGGTTAGTCTCAAGTG	CID3586	3.37587	4858	1542	CAFs	CAFs myCAF-like	CAFs myCAF like s4	HER2+	no_gene_module	no_scTYPER_call	no_inferCNV_call	no_CNA_value
CID3586_TCGCGAGGTAACGACG	CID3586	5.19931	1154	768	CAFs	CAFs myCAF-like	CAFs myCAF like s4	HER2+	no_gene_module	no_scTYPER_call	no_inferCNV_call	no_CNA_value
CID3586_CACCACTTCTACTCAT	CID3586	2.85331	8937	2753	CAFs	CAFs myCAF-like	CAFs myCAF like s4	HER2+	no_gene_module	no_scTYPER_call	no_inferCNV_call	no_CNA_value
CID3586_CTGGTCTTCTGCGACG	CID3586	1.88875	7730	2485	CAFs	CAFs myCAF-like	CAFs myCAF like s4	HER2+	no_gene_module	no_scTYPER_call	no_inferCNV_call	no_CNA_value
CID3586_GCAATCAAGCCCGAAA	CID3586	3.83973	1198	717	CAFs	CAFs myCAF-like	CAFs myCAF like s4	HER2+	no_gene_module	no_scTYPER_call	no_inferCNV_call	no_CNA_value
CID3586_GTGCATAAGATCCGAG	CID3586	2.43278	3124	1311	CAFs	CAFs myCAF-like	CAFs myCAF like s4	HER2+	no_gene_module	no_scTYPER_call	no_inferCNV_call	no_CNA_value
CID3586_CAAGAAAAGATGGGTC	CID3586	2.85507	6900	2227	CAFs	CAFs myCAF-like	CAFs myCAF like s4	HER2+	no_gene_module	no_scTYPER_call	no_inferCNV_call	no_CNA_value
CID3586_TATTACCAGGGCTCTC	CID3586	3.65748	5769	1823	CAFs	CAFs myCAF-like	CAFs myCAF like s4	HER2+	no_gene_module	no_scTYPER_call	no_inferCNV_call	no_CNA_value
CID3586_CAAGGCCTCCGTACAA	CID3586	5.66773	2823	1268	CAFs	CAFs myCAF-like	CAFs myCAF like s5	HER2+	no_gene_module	no_scTYPER_call	no_inferCNV_call	no_CNA_value
CID3586_GCGCCAAGTATATGGA	CID3586	7.64105	2251	978	CAFs	CAFs myCAF-like	CAFs myCAF like s5	HER2+	no_gene_module	no_scTYPER_call	no_inferCNV_call	no_CNA_value
CID3586_AACACGTGTCGGCTCA	CID3586	0.766456	2218	1237	CAFs	CAFs myCAF-like	CAFs myCAF like s5	HER2+	no_gene_module	no_scTYPER_call	no_inferCNV_call	no_CNA_value
CID3586_AAGGCAGTCTTGACGA	CID3586	2.33323	3343	1407	CAFs	CAFs myCAF-like	CAFs myCAF like s5	HER2+	no_gene_module	no_scTYPER_call	no_inferCNV_call	no_CNA_value
CID3586_ACACTGACATACTACG	CID3586	2.92736	2767	1393	CAFs	CAFs myCAF-like	CAFs myCAF like s5	HER2+	no_gene_module	no_scTYPER_call	no_inferCNV_call	no_CNA_value
CID3586_ACAGCTACAGATGGGT	CID3586	1.84177	4778	1822	CAFs	CAFs myCAF-like	CAFs myCAF like s5	HER2+	no_gene_module	no_scTYPER_call	no_inferCNV_call	no_CNA_value
CID3586_AGCCTAACAATCACAC	CID3586	6.17761	6216	2020	CAFs	CAFs myCAF-like	CAFs myCAF like s5	HER2+	no_gene_module	no_scTYPER_call	no_inferCNV_call	no_CNA_value
CID3586_ATCATCTTCCAGAAGG	CID3586	2.9653	6340	1979	CAFs	CAFs myCAF-like	CAFs myCAF like s5	HER2+	no_gene_module	no_scTYPER_call	no_inferCNV_call	no_CNA_value
CID3586_CCACTACAGTGAACGC	CID3586	3.47889	6870	2399	CAFs	CAFs myCAF-like	CAFs myCAF like s5	HER2+	no_gene_module	no_scTYPER_call	no_inferCNV_call	no_CNA_value
CID3586_CCCATACGTCATCCCT	CID3586	4.29379	3540	1330	CAFs	CAFs myCAF-like	CAFs myCAF like s5	HER2+	no_gene_module	no_scTYPER_call	no_inferCNV_call	no_CNA_value
CID3586_CGATGGCAGATCCCGC	CID3586	5.22596	4669	1719	CAFs	CAFs myCAF-like	CAFs myCAF like s5	HER2+	no_gene_module	no_scTYPER_call	no_inferCNV_call	no_CNA_value
CID3586_CGGTTAAGTCTCATCC	CID3586	6.61548	3386	1291	CAFs	CAFs myCAF-like	CAFs myCAF like s5	HER2+	no_gene_module	no_scTYPER_call	no_inferCNV_call	no_CNA_value
CID3586_CTGCCTATCGCGTAGC	CID3586	2.29712	5311	1976	CAFs	CAFs myCAF-like	CAFs myCAF like s5	HER2+	no_gene_module	no_scTYPER_call	no_inferCNV_call	no_CNA_value
CID3586_GACCAATTCTTTACAC	CID3586	0.799361	1251	869	CAFs	CAFs myCAF-like	CAFs myCAF like s5	HER2+	no_gene_module	no_scTYPER_call	no_inferCNV_call	no_CNA_value
CID3586_GCAGCCATCTCTGCTG	CID3586	2.53411	4104	1658	CAFs	CAFs myCAF-like	CAFs myCAF like s5	HER2+	no_gene_module	no_scTYPER_call	no_inferCNV_call	no_CNA_value
CID3586_GCGCAGTTCTTTAGGG	CID3586	7.53181	1965	865	CAFs	CAFs myCAF-like	CAFs myCAF like s5	HER2+	no_gene_module	no_scTYPER_call	no_inferCNV_call	no_CNA_value
CID3586_GCTCCTAGTATAAACG	CID3586	2.86909	6936	2124	CAFs	CAFs myCAF-like	CAFs myCAF like s5	HER2+	no_gene_module	no_scTYPER_call	no_inferCNV_call	no_CNA_value
CID3586_GGGACCTCAGGGATTG	CID3586	5.78387	2628	1361	CAFs	CAFs myCAF-like	CAFs myCAF like s5	HER2+	no_gene_module	no_scTYPER_call	no_inferCNV_call	no_CNA_value
CID3586_TGGTTAGAGCCAGTAG	CID3586	9.58827	1773	945	CAFs	CAFs myCAF-like	CAFs myCAF like s5	HER2+	no_gene_module	no_scTYPER_call	no_inferCNV_call	no_CNA_value
CID3586_TGTCCCACATTGGTAC	CID3586	2.90955	4743	1660	CAFs	CAFs myCAF-like	CAFs myCAF like s5	HER2+	no_gene_module	no_scTYPER_call	no_inferCNV_call	no_CNA_value
CID3586_TTATGCTGTACAGTTC	CID3586	2.11933	6134	2038	CAFs	CAFs myCAF-like	CAFs myCAF like s5	HER2+	no_gene_module	no_scTYPER_call	no_inferCNV_call	no_CNA_value
CID3586_TTTGCGCAGTCTCCTC	CID3586	3.04683	5317	1778	CAFs	CAFs myCAF-like	CAFs myCAF like s5	HER2+	no_gene_module	no_scTYPER_call	no_inferCNV_call	no_CNA_value
CID3586_AGTGGGATCCGTAGTA	CID3586	1.41788	2539	1129	PVL	PVL Differentiated	PVL Differentiated s3	HER2+	no_gene_module	no_scTYPER_call	no_inferCNV_call	no_CNA_value
CID3586_CACAGTACACGGTGTC	CID3586	4.6875	896	506	PVL	PVL Differentiated	PVL Differentiated s3	HER2+	no_gene_module	no_scTYPER_call	no_inferCNV_call	no_CNA_value
CID3586_CATATGGCACGTCAGC	CID3586	7.95647	4135	1389	PVL	PVL Differentiated	PVL Differentiated s3	HER2+	no_gene_module	no_scTYPER_call	no_inferCNV_call	no_CNA_value
CID3586_CATGACATCGTCCAGG	CID3586	2.39453	2631	1132	PVL	PVL Differentiated	PVL Differentiated s3	HER2+	no_gene_module	no_scTYPER_call	no_inferCNV_call	no_CNA_value
CID3586_CTAATGGAGAGAGCTC	CID3586	2.43056	2592	1096	PVL	PVL Differentiated	PVL Differentiated s3	HER2+	no_gene_module	no_scTYPER_call	no_inferCNV_call	no_CNA_value
CID3586_GAAACTCAGCTGATAA	CID3586	11.8208	3883	1175	PVL	PVL Differentiated	PVL Differentiated s3	HER2+	no_gene_module	no_scTYPER_call	no_inferCNV_call	no_CNA_value
CID3586_GCGAGAACATGGATGG	CID3586	6.32733	6385	1821	PVL	PVL Differentiated	PVL Differentiated s3	HER2+	no_gene_module	no_scTYPER_call	no_inferCNV_call	no_CNA_value
CID3586_GTGCTTCTCACCTCGT	CID3586	3.58657	3067	1242	PVL	PVL Differentiated	PVL Differentiated s3	HER2+	no_gene_module	no_scTYPER_call	no_inferCNV_call	no_CNA_value
CID3586_TGGCGCAGTAAGGATT	CID3586	4.87299	3858	1668	PVL	PVL Differentiated	PVL Differentiated s3	HER2+	no_gene_module	no_scTYPER_call	no_inferCNV_call	no_CNA_value
CID3586_TTCTCCTTCTGAAAGA	CID3586	0	1623	684	PVL	PVL Differentiated	PVL Differentiated s3	HER2+	no_gene_module	no_scTYPER_call	no_inferCNV_call	no_CNA_value
CID3586_GCTGGGTAGTGTTGAA	CID3586	8.34697	611	404	PVL	PVL Immature	PVL_Immature s2	HER2+	no_gene_module	no_scTYPER_call	no_inferCNV_call	no_CNA_value
CID3586_CAACCTCAGGTGGGTT	CID3586	0.865385	1040	732	PVL	PVL Immature	PVL_Immature s2	HER2+	no_gene_module	no_scTYPER_call	no_inferCNV_call	no_CNA_value
CID3586_CCTAGCTGTCAACTGT	CID3586	6.54141	1437	832	PVL	PVL Immature	PVL_Immature s2	HER2+	no_gene_module	no_scTYPER_call	no_inferCNV_call	no_CNA_value
CID3586_CGTGTCTTCTGGTGTA	CID3586	7.97744	1241	685	PVL	PVL Immature	PVL_Immature s2	HER2+	no_gene_module	no_scTYPER_call	no_inferCNV_call	no_CNA_value
CID3586_TCTCATAGTCATCGGC	CID3586	9.51157	2334	936	PVL	PVL Immature	PVL_Immature s2	HER2+	no_gene_module	no_scTYPER_call	no_inferCNV_call	no_CNA_value
CID3586_TCAGCTCGTCTTTCAT	CID3586	2.03704	1080	576	PVL	PVL Immature	PVL Immature s1	HER2+	no_gene_module	no_scTYPER_call	no_inferCNV_call	no_CNA_value
CID3586_TAAGAGAAGGTTCCTA	CID3586	3.29114	5530	1695	PVL	PVL Immature	PVL Immature s1	HER2+	no_gene_module	no_scTYPER_call	no_inferCNV_call	no_CNA_value
CID3586_AGTAGTCAGGGTTTCT	CID3586	1.64486	2675	1017	PVL	PVL Immature	PVL Immature s1	HER2+	no_gene_module	no_scTYPER_call	no_inferCNV_call	no_CNA_value
CID3586_CTTAACTAGAGTACAT	CID3586	3.03541	2965	1306	PVL	PVL Immature	PVL Immature s1	HER2+	no_gene_module	no_scTYPER_call	no_inferCNV_call	no_CNA_value
CID3586_GAAGCAGAGCCACGCT	CID3586	1.79704	1892	1066	PVL	PVL Immature	PVL Immature s1	HER2+	no_gene_module	no_scTYPER_call	no_inferCNV_call	no_CNA_value
CID3586_GACACGCGTGTGTGCC	CID3586	3.03538	4777	1538	PVL	PVL Immature	PVL Immature s1	HER2+	no_gene_module	no_scTYPER_call	no_inferCNV_call	no_CNA_value
CID3586_ACGGGTCCATCGATGT	CID3586	1.71948	4071	1725	Endothelial	Endothelial Lymphatic LYVE1	Endothelial Lymphatic LYVE1	HER2+	no_gene_module	no_scTYPER_call	no_inferCNV_call	no_CNA_value
CID3586_CTTACCGTCCTTTCGG	CID3586	5.44554	1818	911	Endothelial	Endothelial Lymphatic LYVE1	Endothelial Lymphatic LYVE1	HER2+	no_gene_module	no_scTYPER_call	no_inferCNV_call	no_CNA_value
CID3586_AAAGTAGGTGCCTGTG	CID3586	2.68908	1785	912	Endothelial	Endothelial Lymphatic LYVE1	Endothelial Lymphatic LYVE1	HER2+	no_gene_module	no_scTYPER_call	no_inferCNV_call	no_CNA_value
CID3586_ACACCCTTCCGCTGTT	CID3586	1.71694	2155	1237	Endothelial	Endothelial Lymphatic LYVE1	Endothelial Lymphatic LYVE1	HER2+	no_gene_module	no_scTYPER_call	no_inferCNV_call	no_CNA_value
CID3586_AGGTCATCAAGACGTG	CID3586	1.35135	1480	861	Endothelial	Endothelial Lymphatic LYVE1	Endothelial Lymphatic LYVE1	HER2+	no_gene_module	no_scTYPER_call	no_inferCNV_call	no_CNA_value
CID3586_CAGATCATCTGGCGAC	CID3586	1.5528	644	491	Endothelial	Endothelial Lymphatic LYVE1	Endothelial Lymphatic LYVE1	HER2+	no_gene_module	no_scTYPER_call	no_inferCNV_call	no_CNA_value
CID3586_CATGACAGTACAGTGG	CID3586	5.0995	804	529	Endothelial	Endothelial Lymphatic LYVE1	Endothelial Lymphatic LYVE1	HER2+	no_gene_module	no_scTYPER_call	no_inferCNV_call	no_CNA_value
CID3586_CCCTCCTCATCGGTTA	CID3586	1.74838	5262	2066	Endothelial	Endothelial Lymphatic LYVE1	Endothelial Lymphatic LYVE1	HER2+	no_gene_module	no_scTYPER_call	no_inferCNV_call	no_CNA_value
CID3586_GCATGATGTTAAGACA	CID3586	1.0719	3825	1688	Endothelial	Endothelial Lymphatic LYVE1	Endothelial Lymphatic LYVE1	HER2+	no_gene_module	no_scTYPER_call	no_inferCNV_call	no_CNA_value
CID3586_TTTCCTCAGGTTACCT	CID3586	1.77702	4108	1649	Endothelial	Endothelial Lymphatic LYVE1	Endothelial Lymphatic LYVE1	HER2+	no_gene_module	no_scTYPER_call	no_inferCNV_call	no_CNA_value
CID3586_AAAGATGCAGGGAGAG	CID3586	5.35373	1569	637	B-cells	B cells Memory	B cells Memory	HER2+	no_gene_module	no_scTYPER_call	no_inferCNV_call	no_CNA_value
CID3586_AAATGCCCATCCCATC	CID3586	0.689061	1161	534	B-cells	B cells Memory	B cells Memory	HER2+	no_gene_module	no_scTYPER_call	no_inferCNV_call	no_CNA_value
CID3586_AACTTTCAGGGCTTGA	CID3586	5.23198	1013	543	B-cells	B cells Memory	B cells Memory	HER2+	no_gene_module	no_scTYPER_call	no_inferCNV_call	no_CNA_value
CID3586_AATCCAGTCAACTCTT	CID3586	0.274725	364	206	B-cells	B cells Memory	B cells Memory	HER2+	no_gene_module	no_scTYPER_call	no_inferCNV_call	no_CNA_value
CID3586_ACGGAGAGTGGGTATG	CID3586	4.35525	1171	559	B-cells	B cells Memory	B cells Memory	HER2+	no_gene_module	no_scTYPER_call	no_inferCNV_call	no_CNA_value
CID3586_AGCTTGAGTACAGTTC	CID3586	4.52187	1349	731	B-cells	B cells Memory	B cells Memory	HER2+	no_gene_module	no_scTYPER_call	no_inferCNV_call	no_CNA_value
CID3586_AGGGAGTAGAATCTCC	CID3586	6.75991	858	490	B-cells	B cells Memory	B cells Memory	HER2+	no_gene_module	no_scTYPER_call	no_inferCNV_call	no_CNA_value
CID3586_ATTACTCTCAACCAAC	CID3586	4.7619	1260	601	B-cells	B cells Memory	B cells Memory	HER2+	no_gene_module	no_scTYPER_call	no_inferCNV_call	no_CNA_value
CID3586_ATTCTACGTCGCATCG	CID3586	9.62145	634	354	B-cells	B cells Memory	B cells Memory	HER2+	no_gene_module	no_scTYPER_call	no_inferCNV_call	no_CNA_value
CID3586_CAAGATCTCATTGCCC	CID3586	6.25575	1087	478	B-cells	B cells Memory	B cells Memory	HER2+	no_gene_module	no_scTYPER_call	no_inferCNV_call	no_CNA_value
CID3586_CACACAACAAACCCAT	CID3586	8.54271	995	410	B-cells	B cells Memory	B cells Memory	HER2+	no_gene_module	no_scTYPER_call	no_inferCNV_call	no_CNA_value
CID3586_CACAGGCAGATATGGT	CID3586	5.31997	1297	645	B-cells	B cells Memory	B cells Memory	HER2+	no_gene_module	no_scTYPER_call	no_inferCNV_call	no_CNA_value
CID3586_CACAGTAAGTGTTGAA	CID3586	3.92593	1350	561	B-cells	B cells Memory	B cells Memory	HER2+	no_gene_module	no_scTYPER_call	no_inferCNV_call	no_CNA_value
CID3586_CACCTTGAGGAGCGAG	CID3586	5.95745	940	522	B-cells	B cells Memory	B cells Memory	HER2+	no_gene_module	no_scTYPER_call	no_inferCNV_call	no_CNA_value
CID3586_CACCTTGTCTAACGGT	CID3586	3.30579	968	511	B-cells	B cells Memory	B cells Memory	HER2+	no_gene_module	no_scTYPER_call	no_inferCNV_call	no_CNA_value
CID3586_CAGAATCAGAAGAAGC	CID3586	8.27402	1124	560	B-cells	B cells Memory	B cells Memory	HER2+	no_gene_module	no_scTYPER_call	no_inferCNV_call	no_CNA_value
CID3586_CAGCGACTCCAGTAGT	CID3586	4.06954	2531	934	B-cells	B cells Memory	B cells Memory	HER2+	no_gene_module	no_scTYPER_call	no_inferCNV_call	no_CNA_value
CID3586_CATTATCCAGCGTTCG	CID3586	13.7174	1458	656	B-cells	B cells Memory	B cells Memory	HER2+	no_gene_module	no_scTYPER_call	no_inferCNV_call	no_CNA_value
CID3586_CATTCGCGTCCAACTA	CID3586	0.25641	780	371	B-cells	B cells Memory	B cells Memory	HER2+	no_gene_module	no_scTYPER_call	no_inferCNV_call	no_CNA_value
CID3586_CCCTCCTTCAGGCAAG	CID3586	4.04463	1434	695	B-cells	B cells Memory	B cells Memory	HER2+	no_gene_module	no_scTYPER_call	no_inferCNV_call	no_CNA_value
CID3586_CGAACATAGGTGATTA	CID3586	2.5641	702	343	B-cells	B cells Memory	B cells Memory	HER2+	no_gene_module	no_scTYPER_call	no_inferCNV_call	no_CNA_value
CID3586_CGATTGACATCGGACC	CID3586	13.2254	1792	687	B-cells	B cells Memory	B cells Memory	HER2+	no_gene_module	no_scTYPER_call	no_inferCNV_call	no_CNA_value
CID3586_CGATTGAGTGGTAACG	CID3586	2.5958	3236	1282	B-cells	B cells Memory	B cells Memory	HER2+	no_gene_module	no_scTYPER_call	no_inferCNV_call	no_CNA_value
CID3586_CGCCAAGTCCTCAACC	CID3586	0.652529	613	369	B-cells	B cells Memory	B cells Memory	HER2+	no_gene_module	no_scTYPER_call	no_inferCNV_call	no_CNA_value
CID3586_CGCTGGAAGCCCAACC	CID3586	0.409836	732	341	B-cells	B cells Memory	B cells Memory	HER2+	no_gene_module	no_scTYPER_call	no_inferCNV_call	no_CNA_value
CID3586_CGGACTGAGCTAACAA	CID3586	5.57914	1649	828	B-cells	B cells Memory	B cells Memory	HER2+	no_gene_module	no_scTYPER_call	no_inferCNV_call	no_CNA_value
CID3586_CGGAGTCTCGTCACGG	CID3586	4.07801	1128	514	B-cells	B cells Memory	B cells Memory	HER2+	no_gene_module	no_scTYPER_call	no_inferCNV_call	no_CNA_value
CID3586_CTAGTGATCTGACCTC	CID3586	0.424929	706	323	B-cells	B cells Memory	B cells Memory	HER2+	no_gene_module	no_scTYPER_call	no_inferCNV_call	no_CNA_value
CID3586_CTCGTACCAGCTGTAT	CID3586	6.27227	1403	667	B-cells	B cells Memory	B cells Memory	HER2+	no_gene_module	no_scTYPER_call	no_inferCNV_call	no_CNA_value
CID3586_CTGAAGTAGACTGGGT	CID3586	5.55556	2250	932	B-cells	B cells Memory	B cells Memory	HER2+	no_gene_module	no_scTYPER_call	no_inferCNV_call	no_CNA_value
CID3586_CTGATAGAGAGTAATC	CID3586	4.15778	1876	797	B-cells	B cells Memory	B cells Memory	HER2+	no_gene_module	no_scTYPER_call	no_inferCNV_call	no_CNA_value
CID3586_CTGATAGAGTGACTCT	CID3586	6.31389	1663	676	B-cells	B cells Memory	B cells Memory	HER2+	no_gene_module	no_scTYPER_call	no_inferCNV_call	no_CNA_value
CID3586_GAAACTCCACCAGGTC	CID3586	4.36026	1399	666	B-cells	B cells Memory	B cells Memory	HER2+	no_gene_module	no_scTYPER_call	no_inferCNV_call	no_CNA_value
CID3586_GACCAATAGGCGACAT	CID3586	4.66149	1802	725	B-cells	B cells Memory	B cells Memory	HER2+	no_gene_module	no_scTYPER_call	no_inferCNV_call	no_CNA_value
CID3586_GACTGCGCAGATCTGT	CID3586	4.60148	1217	591	B-cells	B cells Memory	B cells Memory	HER2+	no_gene_module	no_scTYPER_call	no_inferCNV_call	no_CNA_value
CID3586_GATCGCGGTGCATCTA	CID3586	6.47549	1081	517	B-cells	B cells Memory	B cells Memory	HER2+	no_gene_module	no_scTYPER_call	no_inferCNV_call	no_CNA_value
CID3586_GCAAACTCACTGTCGG	CID3586	8.05952	1613	547	B-cells	B cells Memory	B cells Memory	HER2+	no_gene_module	no_scTYPER_call	no_inferCNV_call	no_CNA_value
CID3586_GCATACACAGGGTATG	CID3586	7.19373	1404	559	B-cells	B cells Memory	B cells Memory	HER2+	no_gene_module	no_scTYPER_call	no_inferCNV_call	no_CNA_value
CID3586_GCGCAACAGGCATTGG	CID3586	1.96078	1479	596	B-cells	B cells Memory	B cells Memory	HER2+	no_gene_module	no_scTYPER_call	no_inferCNV_call	no_CNA_value
CID3586_GCTGCGAGTAAGGGCT	CID3586	11.1615	1102	674	B-cells	B cells Memory	B cells Memory	HER2+	no_gene_module	no_scTYPER_call	no_inferCNV_call	no_CNA_value
CID3586_GGCGACTTCATAACCG	CID3586	3.25397	1260	537	B-cells	B cells Memory	B cells Memory	HER2+	no_gene_module	no_scTYPER_call	no_inferCNV_call	no_CNA_value
CID3586_GGGATGATCACCATAG	CID3586	0.42796	701	337	B-cells	B cells Memory	B cells Memory	HER2+	no_gene_module	no_scTYPER_call	no_inferCNV_call	no_CNA_value
CID3586_GGTGCGTCAATAAGCA	CID3586	10.991	555	290	B-cells	B cells Memory	B cells Memory	HER2+	no_gene_module	no_scTYPER_call	no_inferCNV_call	no_CNA_value
CID3586_GTAACTGCAGACTCGC	CID3586	4.05117	938	493	B-cells	B cells Memory	B cells Memory	HER2+	no_gene_module	no_scTYPER_call	no_inferCNV_call	no_CNA_value
CID3586_GTACTTTAGAGTCTGG	CID3586	3.03158	2375	958	B-cells	B cells Memory	B cells Memory	HER2+	no_gene_module	no_scTYPER_call	no_inferCNV_call	no_CNA_value
CID3586_TAAGCGTCAAGTCTAC	CID3586	3.16781	1168	570	B-cells	B cells Memory	B cells Memory	HER2+	no_gene_module	no_scTYPER_call	no_inferCNV_call	no_CNA_value
CID3586_TACCTTAAGTTAAGTG	CID3586	1.28617	622	408	B-cells	B cells Memory	B cells Memory	HER2+	no_gene_module	no_scTYPER_call	no_inferCNV_call	no_CNA_value
CID3586_TCAACGACAGCTCCGA	CID3586	2.93686	1362	591	B-cells	B cells Memory	B cells Memory	HER2+	no_gene_module	no_scTYPER_call	no_inferCNV_call	no_CNA_value
CID3586_TCGCGAGTCAGCTGGC	CID3586	6.66667	1290	616	B-cells	B cells Memory	B cells Memory	HER2+	no_gene_module	no_scTYPER_call	no_inferCNV_call	no_CNA_value
CID3586_TCTTTCCCAGGACCCT	CID3586	4.24967	1506	744	B-cells	B cells Memory	B cells Memory	HER2+	no_gene_module	no_scTYPER_call	no_inferCNV_call	no_CNA_value
CID3586_TGAGCCGGTAGCGTAG	CID3586	8.10359	1197	365	B-cells	B cells Memory	B cells Memory	HER2+	no_gene_module	no_scTYPER_call	no_inferCNV_call	no_CNA_value
CID3586_TGATTTCGTCCGAGTC	CID3586	1.73033	6126	1532	B-cells	B cells Memory	B cells Memory	HER2+	no_gene_module	no_scTYPER_call	no_inferCNV_call	no_CNA_value
CID3586_TGGCGCAGTAGGCATG	CID3586	5.6042	1142	587	B-cells	B cells Memory	B cells Memory	HER2+	no_gene_module	no_scTYPER_call	no_inferCNV_call	no_CNA_value
CID3586_TTCTTAGGTATAGGTA	CID3586	2.78993	1828	830	B-cells	B cells Memory	B cells Memory	HER2+	no_gene_module	no_scTYPER_call	no_inferCNV_call	no_CNA_value
CID3586_AAAGCAATCGAGCCCA	CID3586	3.60848	2217	810	B-cells	B cells Memory	B cells Memory	HER2+	no_gene_module	no_scTYPER_call	no_inferCNV_call	no_CNA_value
CID3586_AAAGTAGCAAGGCTCC	CID3586	4.77408	2346	822	B-cells	B cells Memory	B cells Memory	HER2+	no_gene_module	no_scTYPER_call	no_inferCNV_call	no_CNA_value
CID3586_AAAGTAGGTACTCAAC	CID3586	6.38925	3052	823	B-cells	B cells Memory	B cells Memory	HER2+	no_gene_module	no_scTYPER_call	no_inferCNV_call	no_CNA_value
CID3586_AAAGTAGTCATGCATG	CID3586	3.59521	3004	966	B-cells	B cells Memory	B cells Memory	HER2+	no_gene_module	no_scTYPER_call	no_inferCNV_call	no_CNA_value
CID3586_AAATGCCAGACTTTCG	CID3586	4.73153	1881	768	B-cells	B cells Memory	B cells Memory	HER2+	no_gene_module	no_scTYPER_call	no_inferCNV_call	no_CNA_value
CID3586_AACCGCGAGTACGCCC	CID3586	6.84279	2309	769	B-cells	B cells Memory	B cells Memory	HER2+	no_gene_module	no_scTYPER_call	no_inferCNV_call	no_CNA_value
CID3586_AACCGCGCATCCGGGT	CID3586	3.17733	2329	1060	B-cells	B cells Memory	B cells Memory	HER2+	no_gene_module	no_scTYPER_call	no_inferCNV_call	no_CNA_value
CID3586_AACTCAGAGTTAGGTA	CID3586	6.20438	3288	1059	B-cells	B cells Memory	B cells Memory	HER2+	no_gene_module	no_scTYPER_call	no_inferCNV_call	no_CNA_value
CID3586_AACTCCCCAGCTCGCA	CID3586	8.00224	1787	691	B-cells	B cells Memory	B cells Memory	HER2+	no_gene_module	no_scTYPER_call	no_inferCNV_call	no_CNA_value
CID3586_AACTGGTAGTTGCAGG	CID3586	4.07767	2060	836	B-cells	B cells Memory	B cells Memory	HER2+	no_gene_module	no_scTYPER_call	no_inferCNV_call	no_CNA_value
CID3586_AAGTCTGGTCCGTGAC	CID3586	1.88983	2487	908	B-cells	B cells Memory	B cells Memory	HER2+	no_gene_module	no_scTYPER_call	no_inferCNV_call	no_CNA_value
CID3586_AATCCAGAGTGGTCCC	CID3586	3.89951	2667	905	B-cells	B cells Memory	B cells Memory	HER2+	no_gene_module	no_scTYPER_call	no_inferCNV_call	no_CNA_value
CID3586_ACAGCCGCAGTCGTGC	CID3586	5.80357	2016	749	B-cells	B cells Memory	B cells Memory	HER2+	no_gene_module	no_scTYPER_call	no_inferCNV_call	no_CNA_value
CID3586_ACAGCTACATTACGAC	CID3586	4.73087	4143	1423	B-cells	B cells Memory	B cells Memory	HER2+	no_gene_module	no_scTYPER_call	no_inferCNV_call	no_CNA_value
CID3586_ACATACGGTGTAATGA	CID3586	3.39765	2384	934	B-cells	B cells Memory	B cells Memory	HER2+	no_gene_module	no_scTYPER_call	no_inferCNV_call	no_CNA_value
CID3586_ACCAGTAGTGCACCAC	CID3586	3.80884	2783	1015	B-cells	B cells Memory	B cells Memory	HER2+	no_gene_module	no_scTYPER_call	no_inferCNV_call	no_CNA_value
CID3586_ACCGTAACATCACCCT	CID3586	3.84439	2185	828	B-cells	B cells Memory	B cells Memory	HER2+	no_gene_module	no_scTYPER_call	no_inferCNV_call	no_CNA_value
CID3586_ACGAGCCAGGATGGTC	CID3586	3.2345	1484	625	B-cells	B cells Memory	B cells Memory	HER2+	no_gene_module	no_scTYPER_call	no_inferCNV_call	no_CNA_value
CID3586_ACGAGCCTCGATAGAA	CID3586	3.24094	2345	797	B-cells	B cells Memory	B cells Memory	HER2+	no_gene_module	no_scTYPER_call	no_inferCNV_call	no_CNA_value
CID3586_ACGTCAAAGGTGATTA	CID3586	2.38876	2135	917	B-cells	B cells Memory	B cells Memory	HER2+	no_gene_module	no_scTYPER_call	no_inferCNV_call	no_CNA_value
CID3586_ACGTCAACACATGTGT	CID3586	1.93149	2744	993	B-cells	B cells Memory	B cells Memory	HER2+	no_gene_module	no_scTYPER_call	no_inferCNV_call	no_CNA_value
CID3586_ACGTCAATCTGCAAGT	CID3586	3.27041	3761	1144	B-cells	B cells Memory	B cells Memory	HER2+	no_gene_module	no_scTYPER_call	no_inferCNV_call	no_CNA_value
CID3586_ACTGAGTCAAAGTGCG	CID3586	6.65956	1877	714	B-cells	B cells Memory	B cells Memory	HER2+	no_gene_module	no_scTYPER_call	no_inferCNV_call	no_CNA_value
CID3586_ACTTACTTCACCTCGT	CID3586	7.16783	1144	464	B-cells	B cells Memory	B cells Memory	HER2+	no_gene_module	no_scTYPER_call	no_inferCNV_call	no_CNA_value
CID3586_ACTTGTTGTCAGAATA	CID3586	2.89474	1900	837	B-cells	B cells Memory	B cells Memory	HER2+	no_gene_module	no_scTYPER_call	no_inferCNV_call	no_CNA_value
CID3586_ACTTGTTGTTAAGATG	CID3586	1.72718	2837	1029	B-cells	B cells Memory	B cells Memory	HER2+	no_gene_module	no_scTYPER_call	no_inferCNV_call	no_CNA_value
CID3586_AGCTCCTTCCTAAGTG	CID3586	1.06242	753	488	B-cells	B cells Memory	B cells Memory	HER2+	no_gene_module	no_scTYPER_call	no_inferCNV_call	no_CNA_value
CID3586_AGCTCTCAGACAGGCT	CID3586	4.37956	2877	1068	B-cells	B cells Memory	B cells Memory	HER2+	no_gene_module	no_scTYPER_call	no_inferCNV_call	no_CNA_value
CID3586_AGCTCTCGTTACTGAC	CID3586	5.44267	2756	986	B-cells	B cells Memory	B cells Memory	HER2+	no_gene_module	no_scTYPER_call	no_inferCNV_call	no_CNA_value
CID3586_AGCTCTCTCACCCTCA	CID3586	5.15619	2657	901	B-cells	B cells Memory	B cells Memory	HER2+	no_gene_module	no_scTYPER_call	no_inferCNV_call	no_CNA_value
CID3586_AGGCCACTCAGCGATT	CID3586	4.643	2563	870	B-cells	B cells Memory	B cells Memory	HER2+	no_gene_module	no_scTYPER_call	no_inferCNV_call	no_CNA_value
CID3586_AGGGAGTAGGACAGAA	CID3586	4.75867	2942	993	B-cells	B cells Memory	B cells Memory	HER2+	no_gene_module	no_scTYPER_call	no_inferCNV_call	no_CNA_value
CID3586_AGGTCATAGATGTTAG	CID3586	5.74892	2557	783	B-cells	B cells Memory	B cells Memory	HER2+	no_gene_module	no_scTYPER_call	no_inferCNV_call	no_CNA_value
CID3586_AGTGTCAAGTCAAGGC	CID3586	5.24458	1983	715	B-cells	B cells Memory	B cells Memory	HER2+	no_gene_module	no_scTYPER_call	no_inferCNV_call	no_CNA_value
CID3586_ATAGACCTCGCCAAAT	CID3586	2.3968	2253	867	B-cells	B cells Memory	B cells Memory	HER2+	no_gene_module	no_scTYPER_call	no_inferCNV_call	no_CNA_value
CID3586_ATCATCTCAATGTAAG	CID3586	7.62463	2046	876	B-cells	B cells Memory	B cells Memory	HER2+	no_gene_module	no_scTYPER_call	no_inferCNV_call	no_CNA_value
CID3586_ATCATGGCAACACCCG	CID3586	3.79474	2319	844	B-cells	B cells Memory	B cells Memory	HER2+	no_gene_module	no_scTYPER_call	no_inferCNV_call	no_CNA_value
CID3586_ATCATGGCATCTCCCA	CID3586	0.793651	1260	553	B-cells	B cells Memory	B cells Memory	HER2+	no_gene_module	no_scTYPER_call	no_inferCNV_call	no_CNA_value
CID3586_ATCGAGTTCTCCCTGA	CID3586	2.50984	2032	931	B-cells	B cells Memory	B cells Memory	HER2+	no_gene_module	no_scTYPER_call	no_inferCNV_call	no_CNA_value
CID3586_ATCTGCCAGTGGTCCC	CID3586	5.10114	2274	790	B-cells	B cells Memory	B cells Memory	HER2+	no_gene_module	no_scTYPER_call	no_inferCNV_call	no_CNA_value
CID3586_ATGTGTGGTGTCGCTG	CID3586	6.84151	1754	802	B-cells	B cells Memory	B cells Memory	HER2+	no_gene_module	no_scTYPER_call	no_inferCNV_call	no_CNA_value
CID3586_ATGTGTGTCAGCTGGC	CID3586	4.27868	2641	948	B-cells	B cells Memory	B cells Memory	HER2+	no_gene_module	no_scTYPER_call	no_inferCNV_call	no_CNA_value
CID3586_ATTCTACAGGGTCGAT	CID3586	3.53535	3168	929	B-cells	B cells Memory	B cells Memory	HER2+	no_gene_module	no_scTYPER_call	no_inferCNV_call	no_CNA_value
CID3586_ATTCTACGTGCATCTA	CID3586	5.19397	3119	1012	B-cells	B cells Memory	B cells Memory	HER2+	no_gene_module	no_scTYPER_call	no_inferCNV_call	no_CNA_value
CID3586_ATTGGTGCAGACTCGC	CID3586	5.0543	2394	885	B-cells	B cells Memory	B cells Memory	HER2+	no_gene_module	no_scTYPER_call	no_inferCNV_call	no_CNA_value
CID3586_ATTTCTGGTGCTAGCC	CID3586	4.95822	1795	801	B-cells	B cells Memory	B cells Memory	HER2+	no_gene_module	no_scTYPER_call	no_inferCNV_call	no_CNA_value
CID3586_CAACCTCTCTGGAGCC	CID3586	4.60589	2106	723	B-cells	B cells Memory	B cells Memory	HER2+	no_gene_module	no_scTYPER_call	no_inferCNV_call	no_CNA_value
CID3586_CAAGATCAGGCCATAG	CID3586	3.84911	2598	919	B-cells	B cells Memory	B cells Memory	HER2+	no_gene_module	no_scTYPER_call	no_inferCNV_call	no_CNA_value
CID3586_CAAGATCCAGTACACT	CID3586	8.13517	1598	789	B-cells	B cells Memory	B cells Memory	HER2+	no_gene_module	no_scTYPER_call	no_inferCNV_call	no_CNA_value
CID3586_CAAGATCGTGACCAAG	CID3586	4.9117	1812	708	B-cells	B cells Memory	B cells Memory	HER2+	no_gene_module	no_scTYPER_call	no_inferCNV_call	no_CNA_value
CID3586_CAAGGCCCAATGCCAT	CID3586	3.03951	1316	537	B-cells	B cells Memory	B cells Memory	HER2+	no_gene_module	no_scTYPER_call	no_inferCNV_call	no_CNA_value
CID3586_CAAGTTGTCCTAAGTG	CID3586	1.9979	1902	631	B-cells	B cells Memory	B cells Memory	HER2+	no_gene_module	no_scTYPER_call	no_inferCNV_call	no_CNA_value
CID3586_CACAAACCATCCTAGA	CID3586	4.7619	2478	985	B-cells	B cells Memory	B cells Memory	HER2+	no_gene_module	no_scTYPER_call	no_inferCNV_call	no_CNA_value
CID3586_CACAGTACATGGAATA	CID3586	8.35194	2239	1098	B-cells	B cells Memory	B cells Memory	HER2+	no_gene_module	no_scTYPER_call	no_inferCNV_call	no_CNA_value
CID3586_CAGAGAGTCTTCATGT	CID3586	4.63941	2177	747	B-cells	B cells Memory	B cells Memory	HER2+	no_gene_module	no_scTYPER_call	no_inferCNV_call	no_CNA_value
CID3586_CAGCATAAGAGGTTGC	CID3586	4.18588	2819	838	B-cells	B cells Memory	B cells Memory	HER2+	no_gene_module	no_scTYPER_call	no_inferCNV_call	no_CNA_value
CID3586_CAGCATAAGTCCTCCT	CID3586	4.01701	2116	756	B-cells	B cells Memory	B cells Memory	HER2+	no_gene_module	no_scTYPER_call	no_inferCNV_call	no_CNA_value
CID3586_CAGCATAGTAGCACGA	CID3586	8.0828	2029	858	B-cells	B cells Memory	B cells Memory	HER2+	no_gene_module	no_scTYPER_call	no_inferCNV_call	no_CNA_value
CID3586_CAGCGACGTACAAGTA	CID3586	4.8011	1458	683	B-cells	B cells Memory	B cells Memory	HER2+	no_gene_module	no_scTYPER_call	no_inferCNV_call	no_CNA_value
CID3586_CAGCTAAGTCTCTTAT	CID3586	7.17029	3124	974	B-cells	B cells Memory	B cells Memory	HER2+	no_gene_module	no_scTYPER_call	no_inferCNV_call	no_CNA_value
CID3586_CAGCTAATCGAATCCA	CID3586	4.76006	2584	927	B-cells	B cells Memory	B cells Memory	HER2+	no_gene_module	no_scTYPER_call	no_inferCNV_call	no_CNA_value
CID3586_CATCCACCACCGGAAA	CID3586	8.62471	1287	582	B-cells	B cells Memory	B cells Memory	HER2+	no_gene_module	no_scTYPER_call	no_inferCNV_call	no_CNA_value
CID3586_CATGCCTTCATATCGG	CID3586	13.3141	2779	773	B-cells	B cells Memory	B cells Memory	HER2+	no_gene_module	no_scTYPER_call	no_inferCNV_call	no_CNA_value
CID3586_CATGGCGAGTGGGTTG	CID3586	2.90237	1895	653	B-cells	B cells Memory	B cells Memory	HER2+	no_gene_module	no_scTYPER_call	no_inferCNV_call	no_CNA_value
CID3586_CCCAGTTGTCGATTGT	CID3586	4.89467	1614	794	B-cells	B cells Memory	B cells Memory	HER2+	no_gene_module	no_scTYPER_call	no_inferCNV_call	no_CNA_value
CID3586_CCCAGTTTCTGATACG	CID3586	14.6523	1208	479	B-cells	B cells Memory	B cells Memory	HER2+	no_gene_module	no_scTYPER_call	no_inferCNV_call	no_CNA_value
CID3586_CCGTACTAGGGTTCCC	CID3586	4.70219	1914	845	B-cells	B cells Memory	B cells Memory	HER2+	no_gene_module	no_scTYPER_call	no_inferCNV_call	no_CNA_value
CID3586_CCGTGGACACACATGT	CID3586	3.66442	2074	776	B-cells	B cells Memory	B cells Memory	HER2+	no_gene_module	no_scTYPER_call	no_inferCNV_call	no_CNA_value
CID3586_CCTATTATCCGAGCCA	CID3586	5.75153	1304	610	B-cells	B cells Memory	B cells Memory	HER2+	no_gene_module	no_scTYPER_call	no_inferCNV_call	no_CNA_value
CID3586_CCTCAGTGTCAATGTC	CID3586	5.96774	1860	710	B-cells	B cells Memory	B cells Memory	HER2+	no_gene_module	no_scTYPER_call	no_inferCNV_call	no_CNA_value
CID3586_CGAACATTCACCTCGT	CID3586	7.18527	1684	722	B-cells	B cells Memory	B cells Memory	HER2+	no_gene_module	no_scTYPER_call	no_inferCNV_call	no_CNA_value
CID3586_CGACTTCAGACCACGA	CID3586	7.0922	987	429	B-cells	B cells Memory	B cells Memory	HER2+	no_gene_module	no_scTYPER_call	no_inferCNV_call	no_CNA_value
CID3586_CGACTTCGTGCCTTGG	CID3586	3.36072	2678	828	B-cells	B cells Memory	B cells Memory	HER2+	no_gene_module	no_scTYPER_call	no_inferCNV_call	no_CNA_value
CID3586_CGATTGAGTCTAAACC	CID3586	5.16343	2111	876	B-cells	B cells Memory	B cells Memory	HER2+	no_gene_module	no_scTYPER_call	no_inferCNV_call	no_CNA_value
CID3586_CGCCAAGAGTTAAGTG	CID3586	1.2844	2180	918	B-cells	B cells Memory	B cells Memory	HER2+	no_gene_module	no_scTYPER_call	no_inferCNV_call	no_CNA_value
CID3586_CGCGTTTGTCGACTGC	CID3586	4.39024	2050	747	B-cells	B cells Memory	B cells Memory	HER2+	no_gene_module	no_scTYPER_call	no_inferCNV_call	no_CNA_value
CID3586_CGCTATCTCGAGGTAG	CID3586	1.45953	2261	1052	B-cells	B cells Memory	B cells Memory	HER2+	no_gene_module	no_scTYPER_call	no_inferCNV_call	no_CNA_value
CID3586_CGGAGCTGTTCAGACT	CID3586	0.87822	1708	733	B-cells	B cells Memory	B cells Memory	HER2+	no_gene_module	no_scTYPER_call	no_inferCNV_call	no_CNA_value
CID3586_CGGAGTCGTAGCGCTC	CID3586	2.28453	2889	883	B-cells	B cells Memory	B cells Memory	HER2+	no_gene_module	no_scTYPER_call	no_inferCNV_call	no_CNA_value
CID3586_CGGTTAATCAGGCAAG	CID3586	5.65142	2318	875	B-cells	B cells Memory	B cells Memory	HER2+	no_gene_module	no_scTYPER_call	no_inferCNV_call	no_CNA_value
CID3586_CGGTTAATCTAACTGG	CID3586	10.1815	992	463	B-cells	B cells Memory	B cells Memory	HER2+	no_gene_module	no_scTYPER_call	no_inferCNV_call	no_CNA_value
CID3586_CGTAGCGGTCAGAATA	CID3586	5.14403	1944	770	B-cells	B cells Memory	B cells Memory	HER2+	no_gene_module	no_scTYPER_call	no_inferCNV_call	no_CNA_value
CID3586_CGTCACTAGGTCGGAT	CID3586	6.29077	2146	782	B-cells	B cells Memory	B cells Memory	HER2+	no_gene_module	no_scTYPER_call	no_inferCNV_call	no_CNA_value
CID3586_CGTCACTCAAATTGCC	CID3586	9.31174	988	458	B-cells	B cells Memory	B cells Memory	HER2+	no_gene_module	no_scTYPER_call	no_inferCNV_call	no_CNA_value
CID3586_CGTCAGGGTAAGCACG	CID3586	5.65476	1344	696	B-cells	B cells Memory	B cells Memory	HER2+	no_gene_module	no_scTYPER_call	no_inferCNV_call	no_CNA_value
CID3586_CGTCAGGGTGTTTGTG	CID3586	5.41772	1975	732	B-cells	B cells Memory	B cells Memory	HER2+	no_gene_module	no_scTYPER_call	no_inferCNV_call	no_CNA_value
CID3586_CGTTAGACATATGCTG	CID3586	2.64901	2114	840	B-cells	B cells Memory	B cells Memory	HER2+	no_gene_module	no_scTYPER_call	no_inferCNV_call	no_CNA_value
CID3586_CGTTCTGAGAAACCTA	CID3586	6.81899	2801	1014	B-cells	B cells Memory	B cells Memory	HER2+	no_gene_module	no_scTYPER_call	no_inferCNV_call	no_CNA_value
CID3586_CGTTGGGCATCGACGC	CID3586	6.72023	2738	1144	B-cells	B cells Memory	B cells Memory	HER2+	no_gene_module	no_scTYPER_call	no_inferCNV_call	no_CNA_value
CID3586_CTAAGACAGAAGATTC	CID3586	4.19486	2217	793	B-cells	B cells Memory	B cells Memory	HER2+	no_gene_module	no_scTYPER_call	no_inferCNV_call	no_CNA_value
CID3586_CTAAGACTCCAAACTG	CID3586	2.49402	2927	1104	B-cells	B cells Memory	B cells Memory	HER2+	no_gene_module	no_scTYPER_call	no_inferCNV_call	no_CNA_value
CID3586_CTAATGGCACTATCTT	CID3586	4.43566	2277	884	B-cells	B cells Memory	B cells Memory	HER2+	no_gene_module	no_scTYPER_call	no_inferCNV_call	no_CNA_value
CID3586_CTAATGGTCGCACTCT	CID3586	7.05948	1799	804	B-cells	B cells Memory	B cells Memory	HER2+	no_gene_module	no_scTYPER_call	no_inferCNV_call	no_CNA_value
CID3586_CTACATTAGATATGCA	CID3586	5.25918	2643	943	B-cells	B cells Memory	B cells Memory	HER2+	no_gene_module	no_scTYPER_call	no_inferCNV_call	no_CNA_value
CID3586_CTAGCCTGTACTTCTT	CID3586	5.78306	3199	1000	B-cells	B cells Memory	B cells Memory	HER2+	no_gene_module	no_scTYPER_call	no_inferCNV_call	no_CNA_value
CID3586_CTCATTATCGCTTAGA	CID3586	5.25578	1427	731	B-cells	B cells Memory	B cells Memory	HER2+	no_gene_module	no_scTYPER_call	no_inferCNV_call	no_CNA_value
CID3586_CTCCTAGAGCTAGGCA	CID3586	5.49624	2529	978	B-cells	B cells Memory	B cells Memory	HER2+	no_gene_module	no_scTYPER_call	no_inferCNV_call	no_CNA_value
CID3586_CTCGAAAAGAATGTTG	CID3586	6.58683	2672	963	B-cells	B cells Memory	B cells Memory	HER2+	no_gene_module	no_scTYPER_call	no_inferCNV_call	no_CNA_value
CID3586_CTCGAGGAGTTAAGTG	CID3586	3.65566	1696	746	B-cells	B cells Memory	B cells Memory	HER2+	no_gene_module	no_scTYPER_call	no_inferCNV_call	no_CNA_value
CID3586_CTCGAGGGTCTCATCC	CID3586	2.55872	2384	937	B-cells	B cells Memory	B cells Memory	HER2+	no_gene_module	no_scTYPER_call	no_inferCNV_call	no_CNA_value
CID3586_CTCGAGGTCCAGTATG	CID3586	1.56438	2493	904	B-cells	B cells Memory	B cells Memory	HER2+	no_gene_module	no_scTYPER_call	no_inferCNV_call	no_CNA_value
CID3586_CTCGGGAAGTCTCAAC	CID3586	5.17346	1643	824	B-cells	B cells Memory	B cells Memory	HER2+	no_gene_module	no_scTYPER_call	no_inferCNV_call	no_CNA_value
CID3586_CTCGTCACACCCAGTG	CID3586	3.52871	3344	1105	B-cells	B cells Memory	B cells Memory	HER2+	no_gene_module	no_scTYPER_call	no_inferCNV_call	no_CNA_value
CID3586_CTCGTCATCCTTAATC	CID3586	2.11982	1085	524	B-cells	B cells Memory	B cells Memory	HER2+	no_gene_module	no_scTYPER_call	no_inferCNV_call	no_CNA_value
CID3586_CTCTACGGTGCAACTT	CID3586	4.21128	2802	984	B-cells	B cells Memory	B cells Memory	HER2+	no_gene_module	no_scTYPER_call	no_inferCNV_call	no_CNA_value
CID3586_CTGAAGTGTACCATCA	CID3586	3.87374	3485	998	B-cells	B cells Memory	B cells Memory	HER2+	no_gene_module	no_scTYPER_call	no_inferCNV_call	no_CNA_value
CID3586_CTGCCTACATCCGCGA	CID3586	4.83908	4381	1545	B-cells	B cells Memory	B cells Memory	HER2+	no_gene_module	no_scTYPER_call	no_inferCNV_call	no_CNA_value
CID3586_CTTAACTGTTCGCTAA	CID3586	4.24866	2236	953	B-cells	B cells Memory	B cells Memory	HER2+	no_gene_module	no_scTYPER_call	no_inferCNV_call	no_CNA_value
CID3586_CTTTGCGCAGGGTTAG	CID3586	4.45092	2404	902	B-cells	B cells Memory	B cells Memory	HER2+	no_gene_module	no_scTYPER_call	no_inferCNV_call	no_CNA_value
CID3586_GAAATGATCAAACCAC	CID3586	3.09968	2839	855	B-cells	B cells Memory	B cells Memory	HER2+	no_gene_module	no_scTYPER_call	no_inferCNV_call	no_CNA_value
CID3586_GAACGGAGTAGCTCCG	CID3586	2.96296	2565	1060	B-cells	B cells Memory	B cells Memory	HER2+	no_gene_module	no_scTYPER_call	no_inferCNV_call	no_CNA_value
CID3586_GAACGGAGTAGTACCT	CID3586	2.76723	1843	807	B-cells	B cells Memory	B cells Memory	HER2+	no_gene_module	no_scTYPER_call	no_inferCNV_call	no_CNA_value
CID3586_GAAGCAGGTGTGCGTC	CID3586	3.37915	1746	796	B-cells	B cells Memory	B cells Memory	HER2+	no_gene_module	no_scTYPER_call	no_inferCNV_call	no_CNA_value
CID3586_GACACGCGTAGCGCTC	CID3586	5.76923	2392	758	B-cells	B cells Memory	B cells Memory	HER2+	no_gene_module	no_scTYPER_call	no_inferCNV_call	no_CNA_value
CID3586_GACAGAGTCTGTCTAT	CID3586	2.97357	908	552	B-cells	B cells Memory	B cells Memory	HER2+	no_gene_module	no_scTYPER_call	no_inferCNV_call	no_CNA_value
CID3586_GACGGCTCAATCTACG	CID3586	4.09865	2879	862	B-cells	B cells Memory	B cells Memory	HER2+	no_gene_module	no_scTYPER_call	no_inferCNV_call	no_CNA_value
CID3586_GACTAACAGATGTGTA	CID3586	4.43221	3813	1302	B-cells	B cells Memory	B cells Memory	HER2+	no_gene_module	no_scTYPER_call	no_inferCNV_call	no_CNA_value
CID3586_GATCAGTGTCTTGCGG	CID3586	2.96187	2701	1206	B-cells	B cells Memory	B cells Memory	HER2+	no_gene_module	no_scTYPER_call	no_inferCNV_call	no_CNA_value
CID3586_GATCGCGGTTGGTGGA	CID3586	5.03181	1729	704	B-cells	B cells Memory	B cells Memory	HER2+	no_gene_module	no_scTYPER_call	no_inferCNV_call	no_CNA_value
CID3586_GATCGTAAGGTGACCA	CID3586	3.9058	1741	758	B-cells	B cells Memory	B cells Memory	HER2+	no_gene_module	no_scTYPER_call	no_inferCNV_call	no_CNA_value
CID3586_GATGAAACAAACTGTC	CID3586	6.24264	1698	677	B-cells	B cells Memory	B cells Memory	HER2+	no_gene_module	no_scTYPER_call	no_inferCNV_call	no_CNA_value
CID3586_GATGAGGAGAAACGCC	CID3586	2.77929	1835	702	B-cells	B cells Memory	B cells Memory	HER2+	no_gene_module	no_scTYPER_call	no_inferCNV_call	no_CNA_value
CID3586_GCACATAGTGCACTTA	CID3586	3.81037	2257	850	B-cells	B cells Memory	B cells Memory	HER2+	no_gene_module	no_scTYPER_call	no_inferCNV_call	no_CNA_value
CID3586_GCATACATCATCGGAT	CID3586	2.34995	3149	1075	B-cells	B cells Memory	B cells Memory	HER2+	no_gene_module	no_scTYPER_call	no_inferCNV_call	no_CNA_value
CID3586_GCATGATCAGTACACT	CID3586	2.90607	1927	774	B-cells	B cells Memory	B cells Memory	HER2+	no_gene_module	no_scTYPER_call	no_inferCNV_call	no_CNA_value
CID3586_GCATGCGCAGCTGTAT	CID3586	2.02703	2072	777	B-cells	B cells Memory	B cells Memory	HER2+	no_gene_module	no_scTYPER_call	no_inferCNV_call	no_CNA_value
CID3586_GCGACCATCCCAAGAT	CID3586	3.66667	2100	913	B-cells	B cells Memory	B cells Memory	HER2+	no_gene_module	no_scTYPER_call	no_inferCNV_call	no_CNA_value
CID3586_GCGAGAATCACCAGGC	CID3586	4.17362	1797	729	B-cells	B cells Memory	B cells Memory	HER2+	no_gene_module	no_scTYPER_call	no_inferCNV_call	no_CNA_value
CID3586_GCGCGATCACTATCTT	CID3586	10.7249	1007	459	B-cells	B cells Memory	B cells Memory	HER2+	no_gene_module	no_scTYPER_call	no_inferCNV_call	no_CNA_value
CID3586_GCGGGTTTCAGGCCCA	CID3586	4.51887	1881	795	B-cells	B cells Memory	B cells Memory	HER2+	no_gene_module	no_scTYPER_call	no_inferCNV_call	no_CNA_value
CID3586_GCTTCCACAAGTTCTG	CID3586	4.38129	1689	789	B-cells	B cells Memory	B cells Memory	HER2+	no_gene_module	no_scTYPER_call	no_inferCNV_call	no_CNA_value
CID3586_GCTTGAAAGGAGCGTT	CID3586	1.11193	1349	528	B-cells	B cells Memory	B cells Memory	HER2+	no_gene_module	no_scTYPER_call	no_inferCNV_call	no_CNA_value
CID3586_GGAACTTTCCGCGGTA	CID3586	6.49632	2309	865	B-cells	B cells Memory	B cells Memory	HER2+	no_gene_module	no_scTYPER_call	no_inferCNV_call	no_CNA_value
CID3586_GGAACTTTCTAACTCT	CID3586	6.00367	2182	814	B-cells	B cells Memory	B cells Memory	HER2+	no_gene_module	no_scTYPER_call	no_inferCNV_call	no_CNA_value
CID3586_GGACAGAAGGATGGAA	CID3586	3.67559	2503	784	B-cells	B cells Memory	B cells Memory	HER2+	no_gene_module	no_scTYPER_call	no_inferCNV_call	no_CNA_value
CID3586_GGACATTGTATATGAG	CID3586	3.90521	2996	1114	B-cells	B cells Memory	B cells Memory	HER2+	no_gene_module	no_scTYPER_call	no_inferCNV_call	no_CNA_value
CID3586_GGATTACTCTGTCCGT	CID3586	5.22023	2452	877	B-cells	B cells Memory	B cells Memory	HER2+	no_gene_module	no_scTYPER_call	no_inferCNV_call	no_CNA_value
CID3586_GGGAGATTCGGCGCTA	CID3586	7.55129	2291	749	B-cells	B cells Memory	B cells Memory	HER2+	no_gene_module	no_scTYPER_call	no_inferCNV_call	no_CNA_value
CID3586_GGGATGAAGATCTGCT	CID3586	6.43006	2395	797	B-cells	B cells Memory	B cells Memory	HER2+	no_gene_module	no_scTYPER_call	no_inferCNV_call	no_CNA_value
CID3586_GGGATGATCCGGCACA	CID3586	3.31918	2591	903	B-cells	B cells Memory	B cells Memory	HER2+	no_gene_module	no_scTYPER_call	no_inferCNV_call	no_CNA_value
CID3586_GGGTCTGAGCCATCGC	CID3586	6.84237	1973	815	B-cells	B cells Memory	B cells Memory	HER2+	no_gene_module	no_scTYPER_call	no_inferCNV_call	no_CNA_value
CID3586_GGTGAAGCACCAGGTC	CID3586	5.49863	2928	921	B-cells	B cells Memory	B cells Memory	HER2+	no_gene_module	no_scTYPER_call	no_inferCNV_call	no_CNA_value
CID3586_GGTGTTAAGGGTATCG	CID3586	3.7296	2574	969	B-cells	B cells Memory	B cells Memory	HER2+	no_gene_module	no_scTYPER_call	no_inferCNV_call	no_CNA_value
CID3586_GTAACGTAGTATGACA	CID3586	7.689	2328	964	B-cells	B cells Memory	B cells Memory	HER2+	no_gene_module	no_scTYPER_call	no_inferCNV_call	no_CNA_value
CID3586_GTAACTGAGTTGAGTA	CID3586	1.96078	2448	893	B-cells	B cells Memory	B cells Memory	HER2+	no_gene_module	no_scTYPER_call	no_inferCNV_call	no_CNA_value
CID3586_GTACGTATCTTGGGTA	CID3586	1.69794	2238	986	B-cells	B cells Memory	B cells Memory	HER2+	no_gene_module	no_scTYPER_call	no_inferCNV_call	no_CNA_value
CID3586_GTAGTCAAGTAATCCC	CID3586	3.07154	2572	1039	B-cells	B cells Memory	B cells Memory	HER2+	no_gene_module	no_scTYPER_call	no_inferCNV_call	no_CNA_value
CID3586_GTCCTCAAGAGTACCG	CID3586	3.4532	3504	932	B-cells	B cells Memory	B cells Memory	HER2+	no_gene_module	no_scTYPER_call	no_inferCNV_call	no_CNA_value
CID3586_GTCGGGTTCGCCCTTA	CID3586	12.9008	1341	637	B-cells	B cells Memory	B cells Memory	HER2+	no_gene_module	no_scTYPER_call	no_inferCNV_call	no_CNA_value
CID3586_GTGAAGGTCGAATGGG	CID3586	3.76085	2074	779	B-cells	B cells Memory	B cells Memory	HER2+	no_gene_module	no_scTYPER_call	no_inferCNV_call	no_CNA_value
CID3586_GTGCATACAAGCCTAT	CID3586	4.66761	1414	678	B-cells	B cells Memory	B cells Memory	HER2+	no_gene_module	no_scTYPER_call	no_inferCNV_call	no_CNA_value
CID3586_GTGCATATCGAGCCCA	CID3586	5.03856	1945	821	B-cells	B cells Memory	B cells Memory	HER2+	no_gene_module	no_scTYPER_call	no_inferCNV_call	no_CNA_value
CID3586_GTTAAGCCACCGATAT	CID3586	7.43802	968	446	B-cells	B cells Memory	B cells Memory	HER2+	no_gene_module	no_scTYPER_call	no_inferCNV_call	no_CNA_value
CID3586_GTTAAGCTCTTGCATT	CID3586	2.3115	1817	808	B-cells	B cells Memory	B cells Memory	HER2+	no_gene_module	no_scTYPER_call	no_inferCNV_call	no_CNA_value
CID3586_GTTCATTGTGCAGTAG	CID3586	3.31623	2533	963	B-cells	B cells Memory	B cells Memory	HER2+	no_gene_module	no_scTYPER_call	no_inferCNV_call	no_CNA_value
CID3586_GTTCGGGAGGGATGGG	CID3586	2.77427	793	461	B-cells	B cells Memory	B cells Memory	HER2+	no_gene_module	no_scTYPER_call	no_inferCNV_call	no_CNA_value
CID3586_GTTCGGGTCACCGTAA	CID3586	4.64548	2045	729	B-cells	B cells Memory	B cells Memory	HER2+	no_gene_module	no_scTYPER_call	no_inferCNV_call	no_CNA_value
CID3586_GTTCGGGTCGTTGACA	CID3586	5.28	1250	650	B-cells	B cells Memory	B cells Memory	HER2+	no_gene_module	no_scTYPER_call	no_inferCNV_call	no_CNA_value
CID3586_TAAGAGACAGTATAAG	CID3586	2.74974	2873	1002	B-cells	B cells Memory	B cells Memory	HER2+	no_gene_module	no_scTYPER_call	no_inferCNV_call	no_CNA_value
CID3586_TAAGTGCGTCCTCCAT	CID3586	7.24838	2166	804	B-cells	B cells Memory	B cells Memory	HER2+	no_gene_module	no_scTYPER_call	no_inferCNV_call	no_CNA_value
CID3586_TACACGACAATCGGTT	CID3586	13.4904	1401	504	B-cells	B cells Memory	B cells Memory	HER2+	no_gene_module	no_scTYPER_call	no_inferCNV_call	no_CNA_value
CID3586_TACCTTAGTTGATTCG	CID3586	3.27082	2293	880	B-cells	B cells Memory	B cells Memory	HER2+	no_gene_module	no_scTYPER_call	no_inferCNV_call	no_CNA_value
CID3586_TACGGATGTAGAGGAA	CID3586	3.74726	3656	1107	B-cells	B cells Memory	B cells Memory	HER2+	no_gene_module	no_scTYPER_call	no_inferCNV_call	no_CNA_value
CID3586_TACGGGCCAGACGCAA	CID3586	5.61544	3989	1174	B-cells	B cells Memory	B cells Memory	HER2+	no_gene_module	no_scTYPER_call	no_inferCNV_call	no_CNA_value
CID3586_TACGGTATCAACCATG	CID3586	2.35736	2927	1098	B-cells	B cells Memory	B cells Memory	HER2+	no_gene_module	no_scTYPER_call	no_inferCNV_call	no_CNA_value
CID3586_TACTCGCAGAGACTTA	CID3586	4.19453	1645	687	B-cells	B cells Memory	B cells Memory	HER2+	no_gene_module	no_scTYPER_call	no_inferCNV_call	no_CNA_value
CID3586_TACTCGCAGGGCTTGA	CID3586	3.9801	2412	1031	B-cells	B cells Memory	B cells Memory	HER2+	no_gene_module	no_scTYPER_call	no_inferCNV_call	no_CNA_value
CID3586_TACTTACGTGGACGAT	CID3586	5.61726	3151	1547	B-cells	B cells Memory	B cells Memory	HER2+	no_gene_module	no_scTYPER_call	no_inferCNV_call	no_CNA_value
CID3586_TAGACCACAGTTCATG	CID3586	6.22389	2394	818	B-cells	B cells Memory	B cells Memory	HER2+	no_gene_module	no_scTYPER_call	no_inferCNV_call	no_CNA_value
CID3586_TATCAGGTCCCTAACC	CID3586	2.9826	1207	597	B-cells	B cells Memory	B cells Memory	HER2+	no_gene_module	no_scTYPER_call	no_inferCNV_call	no_CNA_value
CID3586_TATTACCAGAGAGCTC	CID3586	2.46246	1665	786	B-cells	B cells Memory	B cells Memory	HER2+	no_gene_module	no_scTYPER_call	no_inferCNV_call	no_CNA_value
CID3586_TCAATCTTCACATGCA	CID3586	2.4062	2452	865	B-cells	B cells Memory	B cells Memory	HER2+	no_gene_module	no_scTYPER_call	no_inferCNV_call	no_CNA_value
CID3586_TCACAAGGTTCGCTAA	CID3586	3.67647	1768	782	B-cells	B cells Memory	B cells Memory	HER2+	no_gene_module	no_scTYPER_call	no_inferCNV_call	no_CNA_value
CID3586_TCAGCAACAGGGATTG	CID3586	4.83749	2646	817	B-cells	B cells Memory	B cells Memory	HER2+	no_gene_module	no_scTYPER_call	no_inferCNV_call	no_CNA_value
CID3586_TCAGGTAAGAATAGGG	CID3586	1.06344	5454	1860	B-cells	B cells Memory	B cells Memory	HER2+	no_gene_module	no_scTYPER_call	no_inferCNV_call	no_CNA_value
CID3586_TCATTACGTGACGGTA	CID3586	5.01842	2172	781	B-cells	B cells Memory	B cells Memory	HER2+	no_gene_module	no_scTYPER_call	no_inferCNV_call	no_CNA_value
CID3586_TCATTTGTCACTCTTA	CID3586	6.62806	3108	1218	B-cells	B cells Memory	B cells Memory	HER2+	no_gene_module	no_scTYPER_call	no_inferCNV_call	no_CNA_value
CID3586_TCGAGGCTCGATCCCT	CID3586	7.60931	1761	728	B-cells	B cells Memory	B cells Memory	HER2+	no_gene_module	no_scTYPER_call	no_inferCNV_call	no_CNA_value
CID3586_TCGCGAGTCGGCTACG	CID3586	3.73775	1632	716	B-cells	B cells Memory	B cells Memory	HER2+	no_gene_module	no_scTYPER_call	no_inferCNV_call	no_CNA_value
CID3586_TCGCGAGTCTGGCGAC	CID3586	5.8498	2530	900	B-cells	B cells Memory	B cells Memory	HER2+	no_gene_module	no_scTYPER_call	no_inferCNV_call	no_CNA_value
CID3586_TCGTAGATCATCACCC	CID3586	4.57769	1551	608	B-cells	B cells Memory	B cells Memory	HER2+	no_gene_module	no_scTYPER_call	no_inferCNV_call	no_CNA_value
CID3586_TCTCATATCCGTCATC	CID3586	6.53437	2066	751	B-cells	B cells Memory	B cells Memory	HER2+	no_gene_module	no_scTYPER_call	no_inferCNV_call	no_CNA_value
CID3586_TCTGAGAGTTACGGAG	CID3586	7.84187	1543	690	B-cells	B cells Memory	B cells Memory	HER2+	no_gene_module	no_scTYPER_call	no_inferCNV_call	no_CNA_value
CID3586_TCTTTCCTCCTATGTT	CID3586	6.85404	2028	722	B-cells	B cells Memory	B cells Memory	HER2+	no_gene_module	no_scTYPER_call	no_inferCNV_call	no_CNA_value
CID3586_TGAAAGAGTAAGCACG	CID3586	4.2735	2340	873	B-cells	B cells Memory	B cells Memory	HER2+	no_gene_module	no_scTYPER_call	no_inferCNV_call	no_CNA_value
CID3586_TGACGGCAGATCCGAG	CID3586	5.05119	1465	755	B-cells	B cells Memory	B cells Memory	HER2+	no_gene_module	no_scTYPER_call	no_inferCNV_call	no_CNA_value
CID3586_TGACGGCGTTAAGGGC	CID3586	4.99648	1421	631	B-cells	B cells Memory	B cells Memory	HER2+	no_gene_module	no_scTYPER_call	no_inferCNV_call	no_CNA_value
CID3586_TGACTTTCAGCTGGCT	CID3586	3.05912	2419	1024	B-cells	B cells Memory	B cells Memory	HER2+	no_gene_module	no_scTYPER_call	no_inferCNV_call	no_CNA_value
CID3586_TGAGCATAGACTACAA	CID3586	6.54676	2780	856	B-cells	B cells Memory	B cells Memory	HER2+	no_gene_module	no_scTYPER_call	no_inferCNV_call	no_CNA_value
CID3586_TGCCAAATCGTCGTTC	CID3586	5.71625	1452	610	B-cells	B cells Memory	B cells Memory	HER2+	no_gene_module	no_scTYPER_call	no_inferCNV_call	no_CNA_value
CID3586_TGCCCTAAGTTGTAGA	CID3586	3.88655	1904	723	B-cells	B cells Memory	B cells Memory	HER2+	no_gene_module	no_scTYPER_call	no_inferCNV_call	no_CNA_value
CID3586_TGCGCAGTCAGTTTGG	CID3586	3.57143	2324	1113	B-cells	B cells Memory	B cells Memory	HER2+	no_gene_module	no_scTYPER_call	no_inferCNV_call	no_CNA_value
CID3586_TGCGGGTAGGAGTAGA	CID3586	3.28341	1736	708	B-cells	B cells Memory	B cells Memory	HER2+	no_gene_module	no_scTYPER_call	no_inferCNV_call	no_CNA_value
CID3586_TGCGTGGGTTCCGTCT	CID3586	6.4283	2629	866	B-cells	B cells Memory	B cells Memory	HER2+	no_gene_module	no_scTYPER_call	no_inferCNV_call	no_CNA_value
CID3586_TGGCCAGAGACTTGAA	CID3586	3.69718	2840	1083	B-cells	B cells Memory	B cells Memory	HER2+	no_gene_module	no_scTYPER_call	no_inferCNV_call	no_CNA_value
CID3586_TGGGAAGAGCTACCGC	CID3586	0.619835	968	488	B-cells	B cells Memory	B cells Memory	HER2+	no_gene_module	no_scTYPER_call	no_inferCNV_call	no_CNA_value
CID3586_TGGTTAGTCAGGCCCA	CID3586	3.60158	1777	685	B-cells	B cells Memory	B cells Memory	HER2+	no_gene_module	no_scTYPER_call	no_inferCNV_call	no_CNA_value
CID3586_TGGTTCCAGACAGGCT	CID3586	5.51294	2086	687	B-cells	B cells Memory	B cells Memory	HER2+	no_gene_module	no_scTYPER_call	no_inferCNV_call	no_CNA_value
CID3586_TGTATTCGTTACGACT	CID3586	7.23589	1382	653	B-cells	B cells Memory	B cells Memory	HER2+	no_gene_module	no_scTYPER_call	no_inferCNV_call	no_CNA_value
CID3586_TGTTCCGGTATTAGCC	CID3586	7.44974	2537	816	B-cells	B cells Memory	B cells Memory	HER2+	no_gene_module	no_scTYPER_call	no_inferCNV_call	no_CNA_value
CID3586_TTAGGCAAGGTAGCTG	CID3586	7.43707	1748	685	B-cells	B cells Memory	B cells Memory	HER2+	no_gene_module	no_scTYPER_call	no_inferCNV_call	no_CNA_value
CID3586_TTAGGCATCTGGCGAC	CID3586	4.24242	1320	661	B-cells	B cells Memory	B cells Memory	HER2+	no_gene_module	no_scTYPER_call	no_inferCNV_call	no_CNA_value
CID3586_TTCTCCTTCCGCATCT	CID3586	4.75171	2336	775	B-cells	B cells Memory	B cells Memory	HER2+	no_gene_module	no_scTYPER_call	no_inferCNV_call	no_CNA_value
CID3586_TTGAACGGTTGCGTTA	CID3586	2.9889	2342	919	B-cells	B cells Memory	B cells Memory	HER2+	no_gene_module	no_scTYPER_call	no_inferCNV_call	no_CNA_value
CID3586_TTGAACGTCTAACTCT	CID3586	3.40832	1467	688	B-cells	B cells Memory	B cells Memory	HER2+	no_gene_module	no_scTYPER_call	no_inferCNV_call	no_CNA_value
CID3586_TTGCCGTAGCTAACAA	CID3586	4.52236	1968	724	B-cells	B cells Memory	B cells Memory	HER2+	no_gene_module	no_scTYPER_call	no_inferCNV_call	no_CNA_value
CID3586_TTGCGTCAGAGGTAGA	CID3586	5.58974	3900	1096	B-cells	B cells Memory	B cells Memory	HER2+	no_gene_module	no_scTYPER_call	no_inferCNV_call	no_CNA_value
CID3586_TTGCGTCAGTGTTGAA	CID3586	4.99728	1841	779	B-cells	B cells Memory	B cells Memory	HER2+	no_gene_module	no_scTYPER_call	no_inferCNV_call	no_CNA_value
CID3586_TTTATGCAGGGCTTGA	CID3586	3.0784	2079	837	B-cells	B cells Memory	B cells Memory	HER2+	no_gene_module	no_scTYPER_call	no_inferCNV_call	no_CNA_value
CID3586_TTTCCTCTCTGTTTGT	CID3586	2.55211	2351	831	B-cells	B cells Memory	B cells Memory	HER2+	no_gene_module	no_scTYPER_call	no_inferCNV_call	no_CNA_value
CID3586_TTTGGTTTCGTACGGC	CID3586	6.65895	1727	718	B-cells	B cells Memory	B cells Memory	HER2+	no_gene_module	no_scTYPER_call	no_inferCNV_call	no_CNA_value
CID3586_ACATACGTCCTGCTTG	CID3586	7.83172	1545	694	B-cells	B cells Memory	B cells Memory	HER2+	no_gene_module	no_scTYPER_call	no_inferCNV_call	no_CNA_value
CID3586_GCGCAGTAGAGAGCTC	CID3586	6.76275	1804	807	B-cells	B cells Memory	B cells Memory	HER2+	no_gene_module	no_scTYPER_call	no_inferCNV_call	no_CNA_value
CID3586_GTGAAGGAGTGTACTC	CID3586	4.55985	1579	702	B-cells	B cells Memory	B cells Memory	HER2+	no_gene_module	no_scTYPER_call	no_inferCNV_call	no_CNA_value
CID3586_TAAGCGTGTTCCACGG	CID3586	5.50162	618	350	B-cells	B cells Memory	B cells Memory	HER2+	no_gene_module	no_scTYPER_call	no_inferCNV_call	no_CNA_value
CID3586_TGCGTGGCAGGAATCG	CID3586	4.05405	1850	830	B-cells	B cells Memory	B cells Memory	HER2+	no_gene_module	no_scTYPER_call	no_inferCNV_call	no_CNA_value
CID3586_ATCGAGTTCCAGGGCT	CID3586	7.69231	1105	506	B-cells	B cells Memory	B cells Memory	HER2+	no_gene_module	no_scTYPER_call	no_inferCNV_call	no_CNA_value
CID3586_CAGGTGCAGAACTCGG	CID3586	1.75747	1138	634	B-cells	B cells Memory	B cells Memory	HER2+	no_gene_module	no_scTYPER_call	no_inferCNV_call	no_CNA_value
CID3586_CCATTCGAGTTACCCA	CID3586	5.64024	656	370	B-cells	B cells Memory	B cells Memory	HER2+	no_gene_module	no_scTYPER_call	no_inferCNV_call	no_CNA_value
CID3586_CCATTCGTCCAGAGGA	CID3586	10.3774	530	287	B-cells	B cells Memory	B cells Memory	HER2+	no_gene_module	no_scTYPER_call	no_inferCNV_call	no_CNA_value
CID3586_CGACCTTTCAATACCG	CID3586	5.46624	933	517	B-cells	B cells Memory	B cells Memory	HER2+	no_gene_module	no_scTYPER_call	no_inferCNV_call	no_CNA_value
CID3586_GCGGGTTTCCAGTATG	CID3586	4.40305	1181	626	B-cells	B cells Memory	B cells Memory	HER2+	no_gene_module	no_scTYPER_call	no_inferCNV_call	no_CNA_value
CID3586_GGGCATCAGATGTGGC	CID3586	9.69044	743	365	B-cells	B cells Memory	B cells Memory	HER2+	no_gene_module	no_scTYPER_call	no_inferCNV_call	no_CNA_value
CID3586_TAAACCGTCTACTTAC	CID3586	4.79323	2128	902	B-cells	B cells Memory	B cells Memory	HER2+	no_gene_module	no_scTYPER_call	no_inferCNV_call	no_CNA_value
CID3586_TTCGAAGGTCATCGGC	CID3586	8.86644	891	493	B-cells	B cells Memory	B cells Memory	HER2+	no_gene_module	no_scTYPER_call	no_inferCNV_call	no_CNA_value
CID3586_ACGGAGAAGGGCATGT	CID3586	7.84737	1389	607	B-cells	B cells Memory	B cells Memory	HER2+	no_gene_module	no_scTYPER_call	no_inferCNV_call	no_CNA_value
CID3586_CTGCCTACATACAGCT	CID3586	5.6491	1841	768	B-cells	B cells Memory	B cells Memory	HER2+	no_gene_module	no_scTYPER_call	no_inferCNV_call	no_CNA_value
CID3586_AGCTCTCGTGTCGCTG	CID3586	3.88735	2521	944	B-cells	B cells Memory	B cells Memory	HER2+	no_gene_module	no_scTYPER_call	no_inferCNV_call	no_CNA_value
CID3586_GGGAATGAGACCGGAT	CID3586	2.25096	2088	826	B-cells	B cells Memory	B cells Memory	HER2+	no_gene_module	no_scTYPER_call	no_inferCNV_call	no_CNA_value
CID3586_TCAGATGCAATAACGA	CID3586	6.20032	1258	583	B-cells	B cells Memory	B cells Memory	HER2+	no_gene_module	no_scTYPER_call	no_inferCNV_call	no_CNA_value
CID3586_TGTATTCTCACTCTTA	CID3586	5.88736	7049	2377	B-cells	B cells Memory	B cells Memory	HER2+	no_gene_module	no_scTYPER_call	no_inferCNV_call	no_CNA_value
CID3586_TGTATTCGTAGCTGCC	CID3586	7.77656	913	491	B-cells	B cells Memory	B cells Memory	HER2+	no_gene_module	no_scTYPER_call	no_inferCNV_call	no_CNA_value
CID3586_TTGCCGTTCACTTCAT	CID3586	5.46095	1703	748	B-cells	B cells Memory	B cells Memory	HER2+	no_gene_module	no_scTYPER_call	no_inferCNV_call	no_CNA_value
CID3586_TCGGGACTCTTTCCTC	CID3586	16.6318	956	474	B-cells	B cells Memory	B cells Memory	HER2+	no_gene_module	no_scTYPER_call	no_inferCNV_call	no_CNA_value
CID3586_TTTGGTTCATCCTTGC	CID3586	2.97691	1646	826	B-cells	B cells Memory	B cells Memory	HER2+	no_gene_module	no_scTYPER_call	no_inferCNV_call	no_CNA_value
CID3586_AAACCTGAGTTACGGG	CID3586	4.38871	957	477	B-cells	B cells Naive	B cells Naive	HER2+	no_gene_module	no_scTYPER_call	no_inferCNV_call	no_CNA_value
CID3586_ATTTCTGCAGATCGGA	CID3586	1.91518	1462	686	B-cells	B cells Naive	B cells Naive	HER2+	no_gene_module	no_scTYPER_call	no_inferCNV_call	no_CNA_value
CID3586_CAGGTGCGTATTACCG	CID3586	1.45631	2266	1008	B-cells	B cells Naive	B cells Naive	HER2+	no_gene_module	no_scTYPER_call	no_inferCNV_call	no_CNA_value
CID3586_AAAGCAAGTTAGGGTG	CID3586	4	2400	889	B-cells	B cells Naive	B cells Naive	HER2+	no_gene_module	no_scTYPER_call	no_inferCNV_call	no_CNA_value
CID3586_ACGGGCTCAAGGTTCT	CID3586	4.15452	2744	970	B-cells	B cells Naive	B cells Naive	HER2+	no_gene_module	no_scTYPER_call	no_inferCNV_call	no_CNA_value
CID3586_ACTGTCCAGTTCGCGC	CID3586	4.24742	2425	737	B-cells	B cells Naive	B cells Naive	HER2+	no_gene_module	no_scTYPER_call	no_inferCNV_call	no_CNA_value
CID3586_ACTGTCCGTTAAGATG	CID3586	8.69297	3244	888	B-cells	B cells Naive	B cells Naive	HER2+	no_gene_module	no_scTYPER_call	no_inferCNV_call	no_CNA_value
CID3586_ACTTTCACATGGATGG	CID3586	6.23836	2148	584	B-cells	B cells Naive	B cells Naive	HER2+	no_gene_module	no_scTYPER_call	no_inferCNV_call	no_CNA_value
CID3586_AGATTGCAGGAATTAC	CID3586	7.71046	2542	861	B-cells	B cells Naive	B cells Naive	HER2+	no_gene_module	no_scTYPER_call	no_inferCNV_call	no_CNA_value
CID3586_CAGCTGGCACCTATCC	CID3586	3.44612	1596	735	B-cells	B cells Naive	B cells Naive	HER2+	no_gene_module	no_scTYPER_call	no_inferCNV_call	no_CNA_value
CID3586_CCCAATCTCAAGATCC	CID3586	5.22222	1800	640	B-cells	B cells Naive	B cells Naive	HER2+	no_gene_module	no_scTYPER_call	no_inferCNV_call	no_CNA_value
CID3586_CTGAAACAGCCACGCT	CID3586	4.66321	2123	683	B-cells	B cells Naive	B cells Naive	HER2+	no_gene_module	no_scTYPER_call	no_inferCNV_call	no_CNA_value
CID3586_CTGAAGTAGGATTCGG	CID3586	5.81614	1599	703	B-cells	B cells Naive	B cells Naive	HER2+	no_gene_module	no_scTYPER_call	no_inferCNV_call	no_CNA_value
CID3586_GAAATGAGTCATGCCG	CID3586	3.34596	1584	777	B-cells	B cells Naive	B cells Naive	HER2+	no_gene_module	no_scTYPER_call	no_inferCNV_call	no_CNA_value
CID3586_GACAGAGTCGTATCAG	CID3586	4.59144	1285	777	B-cells	B cells Naive	B cells Naive	HER2+	no_gene_module	no_scTYPER_call	no_inferCNV_call	no_CNA_value
CID3586_GATCGATTCATGTAGC	CID3586	7.02275	1011	522	B-cells	B cells Naive	B cells Naive	HER2+	no_gene_module	no_scTYPER_call	no_inferCNV_call	no_CNA_value
CID3586_GCAAACTGTCCTCTTG	CID3586	6.43154	2410	815	B-cells	B cells Naive	B cells Naive	HER2+	no_gene_module	no_scTYPER_call	no_inferCNV_call	no_CNA_value
CID3586_GCTCCTAGTTCACGGC	CID3586	5.37096	2197	682	B-cells	B cells Naive	B cells Naive	HER2+	no_gene_module	no_scTYPER_call	no_inferCNV_call	no_CNA_value
CID3586_GCTGCAGTCCATGAAC	CID3586	3.12935	1438	748	B-cells	B cells Naive	B cells Naive	HER2+	no_gene_module	no_scTYPER_call	no_inferCNV_call	no_CNA_value
CID3586_GCTGCTTCAAGGACTG	CID3586	7.21569	1275	491	B-cells	B cells Naive	B cells Naive	HER2+	no_gene_module	no_scTYPER_call	no_inferCNV_call	no_CNA_value
CID3586_GTGTGCGAGTGTCTCA	CID3586	4.44795	3170	1022	B-cells	B cells Naive	B cells Naive	HER2+	no_gene_module	no_scTYPER_call	no_inferCNV_call	no_CNA_value
CID3586_TGAGAGGTCAAGCCTA	CID3586	4.12115	2014	798	B-cells	B cells Naive	B cells Naive	HER2+	no_gene_module	no_scTYPER_call	no_inferCNV_call	no_CNA_value
CID3586_TGAGCATTCCGATATG	CID3586	4.13493	1838	709	B-cells	B cells Naive	B cells Naive	HER2+	no_gene_module	no_scTYPER_call	no_inferCNV_call	no_CNA_value
CID3586_TGCGCAGAGATGTCGG	CID3586	2.44828	2900	959	B-cells	B cells Naive	B cells Naive	HER2+	no_gene_module	no_scTYPER_call	no_inferCNV_call	no_CNA_value
CID3586_TGTGGTAAGTGACTCT	CID3586	4.06732	2139	737	B-cells	B cells Naive	B cells Naive	HER2+	no_gene_module	no_scTYPER_call	no_inferCNV_call	no_CNA_value
CID3586_TTAACTCTCGAACTGT	CID3586	3.51526	2162	827	B-cells	B cells Naive	B cells Naive	HER2+	no_gene_module	no_scTYPER_call	no_inferCNV_call	no_CNA_value
CID3586_TTCTTAGGTGCCTGTG	CID3586	3.51986	1108	652	B-cells	B cells Naive	B cells Naive	HER2+	no_gene_module	no_scTYPER_call	no_inferCNV_call	no_CNA_value
CID3586_TTTGGTTTCGTCCAGG	CID3586	4.67572	1326	608	B-cells	B cells Naive	B cells Naive	HER2+	no_gene_module	no_scTYPER_call	no_inferCNV_call	no_CNA_value
CID3586_TTTGTCACAGTCCTTC	CID3586	3.35316	1849	871	B-cells	B cells Naive	B cells Naive	HER2+	no_gene_module	no_scTYPER_call	no_inferCNV_call	no_CNA_value
CID3586_ACCGTAATCTAACTGG	CID3586	4.29907	1605	702	B-cells	B cells Naive	B cells Naive	HER2+	no_gene_module	no_scTYPER_call	no_inferCNV_call	no_CNA_value
CID3586_CTGATAGTCACTTACT	CID3586	7.02417	1324	553	B-cells	B cells Naive	B cells Naive	HER2+	no_gene_module	no_scTYPER_call	no_inferCNV_call	no_CNA_value
CID3586_CATTCGCCACTATCTT	CID3586	0.493274	2230	1101	B-cells	B cells Naive	B cells Naive	HER2+	no_gene_module	no_scTYPER_call	no_inferCNV_call	no_CNA_value
CID3586_ACTTTCAAGCTCCCAG	CID3586	4.71629	1357	656	T-cells	T cells CD8+	T_cells_c4_CD8+_ZFP36	HER2+	no_gene_module	no_scTYPER_call	no_inferCNV_call	no_CNA_value
CID3586_AGGGATGTCGTTACAG	CID3586	4.71888	996	490	T-cells	T cells CD8+	T_cells_c4_CD8+_ZFP36	HER2+	no_gene_module	no_scTYPER_call	no_inferCNV_call	no_CNA_value
CID3586_CCGTACTGTGTCCTCT	CID3586	7.87172	1372	648	T-cells	T cells CD8+	T_cells_c4_CD8+_ZFP36	HER2+	no_gene_module	no_scTYPER_call	no_inferCNV_call	no_CNA_value
CID3586_CCGTACTTCCTTTCTC	CID3586	2.48996	1245	602	T-cells	T cells CD8+	T_cells_c4_CD8+_ZFP36	HER2+	no_gene_module	no_scTYPER_call	no_inferCNV_call	no_CNA_value
CID3586_GAAACTCAGCCTTGAT	CID3586	3.18704	1914	768	T-cells	T cells CD8+	T_cells_c4_CD8+_ZFP36	HER2+	no_gene_module	no_scTYPER_call	no_inferCNV_call	no_CNA_value
CID3586_GACAGAGTCGTGGACC	CID3586	2.81583	1314	594	T-cells	T cells CD8+	T_cells_c4_CD8+_ZFP36	HER2+	no_gene_module	no_scTYPER_call	no_inferCNV_call	no_CNA_value
CID3586_GATGCTATCAAACCAC	CID3586	4.58505	2181	754	T-cells	T cells CD8+	T_cells_c4_CD8+_ZFP36	HER2+	no_gene_module	no_scTYPER_call	no_inferCNV_call	no_CNA_value
CID3586_GCGACCAAGTGTGGCA	CID3586	3.49593	1230	719	T-cells	T cells CD8+	T_cells_c4_CD8+_ZFP36	HER2+	no_gene_module	no_scTYPER_call	no_inferCNV_call	no_CNA_value
CID3586_TCTTTCCGTCTTGTCC	CID3586	5.27157	1252	701	T-cells	T cells CD8+	T_cells_c4_CD8+_ZFP36	HER2+	no_gene_module	no_scTYPER_call	no_inferCNV_call	no_CNA_value
CID3586_AAAGCAACATGCAATC	CID3586	7.15532	1719	713	T-cells	T cells CD8+	T_cells_c4_CD8+_ZFP36	HER2+	no_gene_module	no_scTYPER_call	no_inferCNV_call	no_CNA_value
CID3586_AACCGCGTCGGTTCGG	CID3586	3.70981	1213	441	T-cells	T cells CD8+	T_cells_c4_CD8+_ZFP36	HER2+	no_gene_module	no_scTYPER_call	no_inferCNV_call	no_CNA_value
CID3586_ACACCCTAGACACGAC	CID3586	8.50877	1140	578	T-cells	T cells CD8+	T_cells_c4_CD8+_ZFP36	HER2+	no_gene_module	no_scTYPER_call	no_inferCNV_call	no_CNA_value
CID3586_ACCTTTAAGTCGTTTG	CID3586	7.34141	1403	708	T-cells	T cells CD8+	T_cells_c4_CD8+_ZFP36	HER2+	no_gene_module	no_scTYPER_call	no_inferCNV_call	no_CNA_value
CID3586_ACGAGCCAGATGTAAC	CID3586	7.25806	1488	652	T-cells	T cells CD8+	T_cells_c4_CD8+_ZFP36	HER2+	no_gene_module	no_scTYPER_call	no_inferCNV_call	no_CNA_value
CID3586_ACGATGTCATGTAAGA	CID3586	5.27241	1138	701	T-cells	T cells CD8+	T_cells_c4_CD8+_ZFP36	HER2+	no_gene_module	no_scTYPER_call	no_inferCNV_call	no_CNA_value
CID3586_ACGGGCTAGTCCATAC	CID3586	4.47964	2210	914	T-cells	T cells CD8+	T_cells_c4_CD8+_ZFP36	HER2+	no_gene_module	no_scTYPER_call	no_inferCNV_call	no_CNA_value
CID3586_ACTTACTCATCTACGA	CID3586	8.93665	1768	748	T-cells	T cells CD8+	T_cells_c4_CD8+_ZFP36	HER2+	no_gene_module	no_scTYPER_call	no_inferCNV_call	no_CNA_value
CID3586_AGACGTTCAAAGGTGC	CID3586	4.92139	1463	607	T-cells	T cells CD8+	T_cells_c4_CD8+_ZFP36	HER2+	no_gene_module	no_scTYPER_call	no_inferCNV_call	no_CNA_value
CID3586_AGATTGCTCTGGTGTA	CID3586	2.48062	1935	743	T-cells	T cells CD8+	T_cells_c4_CD8+_ZFP36	HER2+	no_gene_module	no_scTYPER_call	no_inferCNV_call	no_CNA_value
CID3586_AGTGGGACAAGAAGAG	CID3586	6.30631	1665	792	T-cells	T cells CD8+	T_cells_c4_CD8+_ZFP36	HER2+	no_gene_module	no_scTYPER_call	no_inferCNV_call	no_CNA_value
CID3586_ATGCGATTCATCGATG	CID3586	4.96548	3766	1231	T-cells	T cells CD8+	T_cells_c4_CD8+_ZFP36	HER2+	no_gene_module	no_scTYPER_call	no_inferCNV_call	no_CNA_value
CID3586_ATGCGATTCCGTACAA	CID3586	5.30686	2770	963	T-cells	T cells CD8+	T_cells_c4_CD8+_ZFP36	HER2+	no_gene_module	no_scTYPER_call	no_inferCNV_call	no_CNA_value
CID3586_ATTCTACTCAATACCG	CID3586	6.88705	1089	550	T-cells	T cells CD8+	T_cells_c4_CD8+_ZFP36	HER2+	no_gene_module	no_scTYPER_call	no_inferCNV_call	no_CNA_value
CID3586_ATTTCTGTCTGGTGTA	CID3586	8.01527	1310	614	T-cells	T cells CD8+	T_cells_c4_CD8+_ZFP36	HER2+	no_gene_module	no_scTYPER_call	no_inferCNV_call	no_CNA_value
CID3586_CAACCTCAGGACAGAA	CID3586	3.72421	1987	829	T-cells	T cells CD8+	T_cells_c4_CD8+_ZFP36	HER2+	no_gene_module	no_scTYPER_call	no_inferCNV_call	no_CNA_value
CID3586_CAAGAAATCGCCTGTT	CID3586	4.71158	2271	930	T-cells	T cells CD8+	T_cells_c4_CD8+_ZFP36	HER2+	no_gene_module	no_scTYPER_call	no_inferCNV_call	no_CNA_value
CID3586_CAAGGCCAGCGCTCCA	CID3586	1.05093	1237	590	T-cells	T cells CD8+	T_cells_c4_CD8+_ZFP36	HER2+	no_gene_module	no_scTYPER_call	no_inferCNV_call	no_CNA_value
CID3586_CACATTTTCATTTGGG	CID3586	0.589971	2373	727	T-cells	T cells CD8+	T_cells_c4_CD8+_ZFP36	HER2+	no_gene_module	no_scTYPER_call	no_inferCNV_call	no_CNA_value
CID3586_CACTCCAAGATGTTAG	CID3586	5.77992	2699	1083	T-cells	T cells CD8+	T_cells_c4_CD8+_ZFP36	HER2+	no_gene_module	no_scTYPER_call	no_inferCNV_call	no_CNA_value
CID3586_CAGAGAGCAAGTTGTC	CID3586	4.77305	2137	869	T-cells	T cells CD8+	T_cells_c4_CD8+_ZFP36	HER2+	no_gene_module	no_scTYPER_call	no_inferCNV_call	no_CNA_value
CID3586_CAGCATAGTACTCTCC	CID3586	4.65116	2451	928	T-cells	T cells CD8+	T_cells_c4_CD8+_ZFP36	HER2+	no_gene_module	no_scTYPER_call	no_inferCNV_call	no_CNA_value
CID3586_CAGCCGATCCATGAAC	CID3586	4.85915	1420	656	T-cells	T cells CD8+	T_cells_c4_CD8+_ZFP36	HER2+	no_gene_module	no_scTYPER_call	no_inferCNV_call	no_CNA_value
CID3586_CAGCTGGAGGAGTTTA	CID3586	7.19903	1653	817	T-cells	T cells CD8+	T_cells_c4_CD8+_ZFP36	HER2+	no_gene_module	no_scTYPER_call	no_inferCNV_call	no_CNA_value
CID3586_CATATGGAGGCAATTA	CID3586	8.28402	1352	662	T-cells	T cells CD8+	T_cells_c4_CD8+_ZFP36	HER2+	no_gene_module	no_scTYPER_call	no_inferCNV_call	no_CNA_value
CID3586_CATCCACGTAAACACA	CID3586	5.84958	1795	734	T-cells	T cells CD8+	T_cells_c4_CD8+_ZFP36	HER2+	no_gene_module	no_scTYPER_call	no_inferCNV_call	no_CNA_value
CID3586_CATTCGCTCACGATGT	CID3586	3.1665	1958	867	T-cells	T cells CD8+	T_cells_c4_CD8+_ZFP36	HER2+	no_gene_module	no_scTYPER_call	no_inferCNV_call	no_CNA_value
CID3586_CCAATCCGTGTCGCTG	CID3586	3.5012	2085	872	T-cells	T cells CD8+	T_cells_c4_CD8+_ZFP36	HER2+	no_gene_module	no_scTYPER_call	no_inferCNV_call	no_CNA_value
CID3586_CCACTACAGTTGTAGA	CID3586	3.92254	2014	884	T-cells	T cells CD8+	T_cells_c4_CD8+_ZFP36	HER2+	no_gene_module	no_scTYPER_call	no_inferCNV_call	no_CNA_value
CID3586_CCCAGTTGTGTAATGA	CID3586	5.71058	1541	642	T-cells	T cells CD8+	T_cells_c4_CD8+_ZFP36	HER2+	no_gene_module	no_scTYPER_call	no_inferCNV_call	no_CNA_value
CID3586_CCCTCCTCACATTTCT	CID3586	4.90342	2019	913	T-cells	T cells CD8+	T_cells_c4_CD8+_ZFP36	HER2+	no_gene_module	no_scTYPER_call	no_inferCNV_call	no_CNA_value
CID3586_CCGTACTGTCAGTGGA	CID3586	3.89535	1720	864	T-cells	T cells CD8+	T_cells_c4_CD8+_ZFP36	HER2+	no_gene_module	no_scTYPER_call	no_inferCNV_call	no_CNA_value
CID3586_CCTTCCCAGACCTAGG	CID3586	0.698925	1860	761	T-cells	T cells CD8+	T_cells_c4_CD8+_ZFP36	HER2+	no_gene_module	no_scTYPER_call	no_inferCNV_call	no_CNA_value
CID3586_CCTTTCTTCTCGGACG	CID3586	3.35991	1756	860	T-cells	T cells CD8+	T_cells_c4_CD8+_ZFP36	HER2+	no_gene_module	no_scTYPER_call	no_inferCNV_call	no_CNA_value
CID3586_CGAGCACGTGCCTGGT	CID3586	3.94412	1217	540	T-cells	T cells CD8+	T_cells_c4_CD8+_ZFP36	HER2+	no_gene_module	no_scTYPER_call	no_inferCNV_call	no_CNA_value
CID3586_CGCCAAGTCCAAAGTC	CID3586	3.19149	1692	811	T-cells	T cells CD8+	T_cells_c4_CD8+_ZFP36	HER2+	no_gene_module	no_scTYPER_call	no_inferCNV_call	no_CNA_value
CID3586_CGCGTTTAGGAGTTTA	CID3586	2.4147	1905	861	T-cells	T cells CD8+	T_cells_c4_CD8+_ZFP36	HER2+	no_gene_module	no_scTYPER_call	no_inferCNV_call	no_CNA_value
CID3586_CGGACGTCACAGACTT	CID3586	10.2369	1182	621	T-cells	T cells CD8+	T_cells_c4_CD8+_ZFP36	HER2+	no_gene_module	no_scTYPER_call	no_inferCNV_call	no_CNA_value
CID3586_CGGACTGCATTCGACA	CID3586	5.99429	1051	517	T-cells	T cells CD8+	T_cells_c4_CD8+_ZFP36	HER2+	no_gene_module	no_scTYPER_call	no_inferCNV_call	no_CNA_value
CID3586_CGTAGCGAGACCCACC	CID3586	5.6299	2167	873	T-cells	T cells CD8+	T_cells_c4_CD8+_ZFP36	HER2+	no_gene_module	no_scTYPER_call	no_inferCNV_call	no_CNA_value
CID3586_CGTCACTTCAAGGCTT	CID3586	5.29451	1511	674	T-cells	T cells CD8+	T_cells_c4_CD8+_ZFP36	HER2+	no_gene_module	no_scTYPER_call	no_inferCNV_call	no_CNA_value
CID3586_CGTGTCTGTAGCTAAA	CID3586	3.12213	1089	528	T-cells	T cells CD8+	T_cells_c4_CD8+_ZFP36	HER2+	no_gene_module	no_scTYPER_call	no_inferCNV_call	no_CNA_value
CID3586_CTAAGACCAGGCTGAA	CID3586	8.2542	1369	666	T-cells	T cells CD8+	T_cells_c4_CD8+_ZFP36	HER2+	no_gene_module	no_scTYPER_call	no_inferCNV_call	no_CNA_value
CID3586_CTAAGACTCTGGTATG	CID3586	6.34706	1481	687	T-cells	T cells CD8+	T_cells_c4_CD8+_ZFP36	HER2+	no_gene_module	no_scTYPER_call	no_inferCNV_call	no_CNA_value
CID3586_CTACACCTCGCGTTTC	CID3586	1.70109	1646	744	T-cells	T cells CD8+	T_cells_c4_CD8+_ZFP36	HER2+	no_gene_module	no_scTYPER_call	no_inferCNV_call	no_CNA_value
CID3586_CTACCCAAGTCCAGGA	CID3586	2.3773	2608	988	T-cells	T cells CD8+	T_cells_c4_CD8+_ZFP36	HER2+	no_gene_module	no_scTYPER_call	no_inferCNV_call	no_CNA_value
CID3586_CTACCCAGTACCGTAT	CID3586	7.11133	2039	795	T-cells	T cells CD8+	T_cells_c4_CD8+_ZFP36	HER2+	no_gene_module	no_scTYPER_call	no_inferCNV_call	no_CNA_value
CID3586_CTAGCCTGTCCGAACC	CID3586	4.63108	2548	1013	T-cells	T cells CD8+	T_cells_c4_CD8+_ZFP36	HER2+	no_gene_module	no_scTYPER_call	no_inferCNV_call	no_CNA_value
CID3586_CTCGAAATCATTGCCC	CID3586	3.78682	2139	845	T-cells	T cells CD8+	T_cells_c4_CD8+_ZFP36	HER2+	no_gene_module	no_scTYPER_call	no_inferCNV_call	no_CNA_value
CID3586_CTCGTACAGTGACTCT	CID3586	5.15464	1843	823	T-cells	T cells CD8+	T_cells_c4_CD8+_ZFP36	HER2+	no_gene_module	no_scTYPER_call	no_inferCNV_call	no_CNA_value
CID3586_CTCGTACTCCTCAATT	CID3586	5.73529	2040	900	T-cells	T cells CD8+	T_cells_c4_CD8+_ZFP36	HER2+	no_gene_module	no_scTYPER_call	no_inferCNV_call	no_CNA_value
CID3586_CTGATCCGTGCAGTAG	CID3586	4.11275	2164	914	T-cells	T cells CD8+	T_cells_c4_CD8+_ZFP36	HER2+	no_gene_module	no_scTYPER_call	no_inferCNV_call	no_CNA_value
CID3586_CTGTTTAAGTTTGCGT	CID3586	4.22111	1990	860	T-cells	T cells CD8+	T_cells_c4_CD8+_ZFP36	HER2+	no_gene_module	no_scTYPER_call	no_inferCNV_call	no_CNA_value
CID3586_CTTAACTAGCGCTTAT	CID3586	4.12186	1116	551	T-cells	T cells CD8+	T_cells_c4_CD8+_ZFP36	HER2+	no_gene_module	no_scTYPER_call	no_inferCNV_call	no_CNA_value
CID3586_CTTCTCTTCACCATAG	CID3586	3.93812	1422	775	T-cells	T cells CD8+	T_cells_c4_CD8+_ZFP36	HER2+	no_gene_module	no_scTYPER_call	no_inferCNV_call	no_CNA_value
CID3586_CTTGGCTTCTGAAAGA	CID3586	5.58082	2419	945	T-cells	T cells CD8+	T_cells_c4_CD8+_ZFP36	HER2+	no_gene_module	no_scTYPER_call	no_inferCNV_call	no_CNA_value
CID3586_GAATAAGGTCTCCACT	CID3586	5.96491	1710	680	T-cells	T cells CD8+	T_cells_c4_CD8+_ZFP36	HER2+	no_gene_module	no_scTYPER_call	no_inferCNV_call	no_CNA_value
CID3586_GAATAAGTCGGAAACG	CID3586	3.91986	1148	611	T-cells	T cells CD8+	T_cells_c4_CD8+_ZFP36	HER2+	no_gene_module	no_scTYPER_call	no_inferCNV_call	no_CNA_value
CID3586_GACCTGGCAGCATGAG	CID3586	6.65956	1877	815	T-cells	T cells CD8+	T_cells_c4_CD8+_ZFP36	HER2+	no_gene_module	no_scTYPER_call	no_inferCNV_call	no_CNA_value
CID3586_GATCGATAGTTTGCGT	CID3586	5.52326	2064	888	T-cells	T cells CD8+	T_cells_c4_CD8+_ZFP36	HER2+	no_gene_module	no_scTYPER_call	no_inferCNV_call	no_CNA_value
CID3586_GATCGTAAGTCTTGCA	CID3586	6.78261	1725	723	T-cells	T cells CD8+	T_cells_c4_CD8+_ZFP36	HER2+	no_gene_module	no_scTYPER_call	no_inferCNV_call	no_CNA_value
CID3586_GATGAGGGTCGGCTCA	CID3586	4.02062	970	512	T-cells	T cells CD8+	T_cells_c4_CD8+_ZFP36	HER2+	no_gene_module	no_scTYPER_call	no_inferCNV_call	no_CNA_value
CID3586_GCACATATCCACTCCA	CID3586	4.7259	2116	948	T-cells	T cells CD8+	T_cells_c4_CD8+_ZFP36	HER2+	no_gene_module	no_scTYPER_call	no_inferCNV_call	no_CNA_value
CID3586_GCACTCTAGCCCTAAT	CID3586	5.66542	1871	734	T-cells	T cells CD8+	T_cells_c4_CD8+_ZFP36	HER2+	no_gene_module	no_scTYPER_call	no_inferCNV_call	no_CNA_value
CID3586_GCATACATCTACTTAC	CID3586	5.71529	2852	1154	T-cells	T cells CD8+	T_cells_c4_CD8+_ZFP36	HER2+	no_gene_module	no_scTYPER_call	no_inferCNV_call	no_CNA_value
CID3586_GCCAAATGTTTAGCTG	CID3586	4.59459	1850	758	T-cells	T cells CD8+	T_cells_c4_CD8+_ZFP36	HER2+	no_gene_module	no_scTYPER_call	no_inferCNV_call	no_CNA_value
CID3586_GCTCCTAAGTTCGATC	CID3586	2.93955	1803	893	T-cells	T cells CD8+	T_cells_c4_CD8+_ZFP36	HER2+	no_gene_module	no_scTYPER_call	no_inferCNV_call	no_CNA_value
CID3586_GCTGCAGCAGATCCAT	CID3586	5.07569	1123	543	T-cells	T cells CD8+	T_cells_c4_CD8+_ZFP36	HER2+	no_gene_module	no_scTYPER_call	no_inferCNV_call	no_CNA_value
CID3586_GCTGGGTCAGCTGCAC	CID3586	6.06452	775	497	T-cells	T cells CD8+	T_cells_c4_CD8+_ZFP36	HER2+	no_gene_module	no_scTYPER_call	no_inferCNV_call	no_CNA_value
CID3586_GGACATTTCGTTTATC	CID3586	3.72613	2147	946	T-cells	T cells CD8+	T_cells_c4_CD8+_ZFP36	HER2+	no_gene_module	no_scTYPER_call	no_inferCNV_call	no_CNA_value
CID3586_GGCAATTTCATATCGG	CID3586	3.75733	2901	1024	T-cells	T cells CD8+	T_cells_c4_CD8+_ZFP36	HER2+	no_gene_module	no_scTYPER_call	no_inferCNV_call	no_CNA_value
CID3586_GGCCGATAGGATATAC	CID3586	4.42804	1897	859	T-cells	T cells CD8+	T_cells_c4_CD8+_ZFP36	HER2+	no_gene_module	no_scTYPER_call	no_inferCNV_call	no_CNA_value
CID3586_GGCTGGTCAATGGACG	CID3586	9.03491	1948	805	T-cells	T cells CD8+	T_cells_c4_CD8+_ZFP36	HER2+	no_gene_module	no_scTYPER_call	no_inferCNV_call	no_CNA_value
CID3586_GGGAATGTCCCTGACT	CID3586	6.10743	1359	619	T-cells	T cells CD8+	T_cells_c4_CD8+_ZFP36	HER2+	no_gene_module	no_scTYPER_call	no_inferCNV_call	no_CNA_value
CID3586_GGGAGATAGCACCGCT	CID3586	3.01845	1789	766	T-cells	T cells CD8+	T_cells_c4_CD8+_ZFP36	HER2+	no_gene_module	no_scTYPER_call	no_inferCNV_call	no_CNA_value
CID3586_GGTGTTAGTCAACTGT	CID3586	2.89799	2588	924	T-cells	T cells CD8+	T_cells_c4_CD8+_ZFP36	HER2+	no_gene_module	no_scTYPER_call	no_inferCNV_call	no_CNA_value
CID3586_GTAGTCATCCCTTGTG	CID3586	5.41126	1386	608	T-cells	T cells CD8+	T_cells_c4_CD8+_ZFP36	HER2+	no_gene_module	no_scTYPER_call	no_inferCNV_call	no_CNA_value
CID3586_GTCATTTCAAAGTGCG	CID3586	4.5701	1291	596	T-cells	T cells CD8+	T_cells_c4_CD8+_ZFP36	HER2+	no_gene_module	no_scTYPER_call	no_inferCNV_call	no_CNA_value
CID3586_GTGCATAGTTTCCACC	CID3586	4.06879	2384	899	T-cells	T cells CD8+	T_cells_c4_CD8+_ZFP36	HER2+	no_gene_module	no_scTYPER_call	no_inferCNV_call	no_CNA_value
CID3586_GTGTGCGCAAGGTTCT	CID3586	6.13383	1614	695	T-cells	T cells CD8+	T_cells_c4_CD8+_ZFP36	HER2+	no_gene_module	no_scTYPER_call	no_inferCNV_call	no_CNA_value
CID3586_TAAGCGTCAGCCTTGG	CID3586	3.55987	1545	635	T-cells	T cells CD8+	T_cells_c4_CD8+_ZFP36	HER2+	no_gene_module	no_scTYPER_call	no_inferCNV_call	no_CNA_value
CID3586_TAAGCGTTCGAACGGA	CID3586	4.01979	1617	728	T-cells	T cells CD8+	T_cells_c4_CD8+_ZFP36	HER2+	no_gene_module	no_scTYPER_call	no_inferCNV_call	no_CNA_value
CID3586_TACGGATTCAGGCAAG	CID3586	4.7588	1534	665	T-cells	T cells CD8+	T_cells_c4_CD8+_ZFP36	HER2+	no_gene_module	no_scTYPER_call	no_inferCNV_call	no_CNA_value
CID3586_TACTTGTGTCCGAACC	CID3586	2.03659	2897	1290	T-cells	T cells CD8+	T_cells_c4_CD8+_ZFP36	HER2+	no_gene_module	no_scTYPER_call	no_inferCNV_call	no_CNA_value
CID3586_TAGAGCTAGCTAGCCC	CID3586	6.22951	2135	782	T-cells	T cells CD8+	T_cells_c4_CD8+_ZFP36	HER2+	no_gene_module	no_scTYPER_call	no_inferCNV_call	no_CNA_value
CID3586_TAGAGCTAGTGTGAAT	CID3586	2.1329	1219	615	T-cells	T cells CD8+	T_cells_c4_CD8+_ZFP36	HER2+	no_gene_module	no_scTYPER_call	no_inferCNV_call	no_CNA_value
CID3586_TCATTACGTCTGGAGA	CID3586	5.11911	1973	778	T-cells	T cells CD8+	T_cells_c4_CD8+_ZFP36	HER2+	no_gene_module	no_scTYPER_call	no_inferCNV_call	no_CNA_value
CID3586_TCGAGGCTCCGTACAA	CID3586	5.47264	1005	561	T-cells	T cells CD8+	T_cells_c4_CD8+_ZFP36	HER2+	no_gene_module	no_scTYPER_call	no_inferCNV_call	no_CNA_value
CID3586_TCTTCGGGTCCCTACT	CID3586	3.63188	2836	1198	T-cells	T cells CD8+	T_cells_c4_CD8+_ZFP36	HER2+	no_gene_module	no_scTYPER_call	no_inferCNV_call	no_CNA_value
CID3586_TGAAAGAGTCAGGACA	CID3586	4.83951	2025	864	T-cells	T cells CD8+	T_cells_c4_CD8+_ZFP36	HER2+	no_gene_module	no_scTYPER_call	no_inferCNV_call	no_CNA_value
CID3586_TGAGGGAGTGTTGGGA	CID3586	4.88202	1229	620	T-cells	T cells CD8+	T_cells_c4_CD8+_ZFP36	HER2+	no_gene_module	no_scTYPER_call	no_inferCNV_call	no_CNA_value
CID3586_TGCCAAAAGATCCGAG	CID3586	2.48619	2534	1270	T-cells	T cells CD8+	T_cells_c4_CD8+_ZFP36	HER2+	no_gene_module	no_scTYPER_call	no_inferCNV_call	no_CNA_value
CID3586_TGCGCAGAGAACAACT	CID3586	5.63648	1579	790	T-cells	T cells CD8+	T_cells_c4_CD8+_ZFP36	HER2+	no_gene_module	no_scTYPER_call	no_inferCNV_call	no_CNA_value
CID3586_TTCTACATCCTTAATC	CID3586	7.49614	1294	684	T-cells	T cells CD8+	T_cells_c4_CD8+_ZFP36	HER2+	no_gene_module	no_scTYPER_call	no_inferCNV_call	no_CNA_value
CID3586_TTGAACGGTTCGAATC	CID3586	6.85892	1283	674	T-cells	T cells CD8+	T_cells_c4_CD8+_ZFP36	HER2+	no_gene_module	no_scTYPER_call	no_inferCNV_call	no_CNA_value
CID3586_TTTGCGCAGACTTGAA	CID3586	5.32258	1860	787	T-cells	T cells CD8+	T_cells_c4_CD8+_ZFP36	HER2+	no_gene_module	no_scTYPER_call	no_inferCNV_call	no_CNA_value
CID3586_AGTAGTCTCGAACGGA	CID3586	4.17755	1532	560	T-cells	T cells CD8+	T_cells_c4_CD8+_ZFP36	HER2+	no_gene_module	no_scTYPER_call	no_inferCNV_call	no_CNA_value
CID3586_GAACGGATCCACGTTC	CID3586	4.23001	1513	615	T-cells	T cells CD8+	T_cells_c4_CD8+_ZFP36	HER2+	no_gene_module	no_scTYPER_call	no_inferCNV_call	no_CNA_value
CID3586_AAAGATGAGCCGGTAA	CID3586	7.7765	1736	783	T-cells	T cells CD8+	T_cells_c4_CD8+_ZFP36	HER2+	no_gene_module	no_scTYPER_call	no_inferCNV_call	no_CNA_value
CID3586_AACCGCGTCTTTACAC	CID3586	3.36134	1428	667	T-cells	T cells CD8+	T_cells_c4_CD8+_ZFP36	HER2+	no_gene_module	no_scTYPER_call	no_inferCNV_call	no_CNA_value
CID3586_AACTCTTGTATTAGCC	CID3586	3.94046	1142	584	T-cells	T cells CD8+	T_cells_c4_CD8+_ZFP36	HER2+	no_gene_module	no_scTYPER_call	no_inferCNV_call	no_CNA_value
CID3586_AAGTCTGTCGAGCCCA	CID3586	4.88338	1372	578	T-cells	T cells CD8+	T_cells_c4_CD8+_ZFP36	HER2+	no_gene_module	no_scTYPER_call	no_inferCNV_call	no_CNA_value
CID3586_ACATGGTGTACAGACG	CID3586	7.11225	1167	603	T-cells	T cells CD8+	T_cells_c4_CD8+_ZFP36	HER2+	no_gene_module	no_scTYPER_call	no_inferCNV_call	no_CNA_value
CID3586_ACCCACTAGCGAGAAA	CID3586	5.70627	1069	481	T-cells	T cells CD8+	T_cells_c4_CD8+_ZFP36	HER2+	no_gene_module	no_scTYPER_call	no_inferCNV_call	no_CNA_value
CID3586_ACTATCTCATGTTCCC	CID3586	3.54449	1326	616	T-cells	T cells CD8+	T_cells_c4_CD8+_ZFP36	HER2+	no_gene_module	no_scTYPER_call	no_inferCNV_call	no_CNA_value
CID3586_ACTGCTCGTAGTAGTA	CID3586	5.96273	1610	832	T-cells	T cells CD8+	T_cells_c4_CD8+_ZFP36	HER2+	no_gene_module	no_scTYPER_call	no_inferCNV_call	no_CNA_value
CID3586_AGGGAGTGTAGCAAAT	CID3586	7.08302	1313	458	T-cells	T cells CD8+	T_cells_c4_CD8+_ZFP36	HER2+	no_gene_module	no_scTYPER_call	no_inferCNV_call	no_CNA_value
CID3586_ATAACGCTCCAGATCA	CID3586	3.25149	1507	615	T-cells	T cells CD8+	T_cells_c4_CD8+_ZFP36	HER2+	no_gene_module	no_scTYPER_call	no_inferCNV_call	no_CNA_value
CID3586_ATCCACCCACAGCCCA	CID3586	7.08609	1510	614	T-cells	T cells CD8+	T_cells_c4_CD8+_ZFP36	HER2+	no_gene_module	no_scTYPER_call	no_inferCNV_call	no_CNA_value
CID3586_ATCTACTTCGGCGGTT	CID3586	3.93258	1424	611	T-cells	T cells CD8+	T_cells_c4_CD8+_ZFP36	HER2+	no_gene_module	no_scTYPER_call	no_inferCNV_call	no_CNA_value
CID3586_CACATTTCACATGACT	CID3586	2.07906	3415	1119	T-cells	T cells CD8+	T_cells_c4_CD8+_ZFP36	HER2+	no_gene_module	no_scTYPER_call	no_inferCNV_call	no_CNA_value
CID3586_CAGCCGATCTCCAACC	CID3586	5.41958	1716	699	T-cells	T cells CD8+	T_cells_c4_CD8+_ZFP36	HER2+	no_gene_module	no_scTYPER_call	no_inferCNV_call	no_CNA_value
CID3586_CAGCTAAAGATCGGGT	CID3586	3.5083	3734	1351	T-cells	T cells CD8+	T_cells_c4_CD8+_ZFP36	HER2+	no_gene_module	no_scTYPER_call	no_inferCNV_call	no_CNA_value
CID3586_CATCGGGAGGACCACA	CID3586	2.02652	3997	1424	T-cells	T cells CD8+	T_cells_c4_CD8+_ZFP36	HER2+	no_gene_module	no_scTYPER_call	no_inferCNV_call	no_CNA_value
CID3586_CATCGGGGTAGGGTAC	CID3586	6.68426	1137	551	T-cells	T cells CD8+	T_cells_c4_CD8+_ZFP36	HER2+	no_gene_module	no_scTYPER_call	no_inferCNV_call	no_CNA_value
CID3586_CATTATCCAAGCTGTT	CID3586	4.25	1200	624	T-cells	T cells CD8+	T_cells_c4_CD8+_ZFP36	HER2+	no_gene_module	no_scTYPER_call	no_inferCNV_call	no_CNA_value
CID3586_CCGTACTTCATCTGTT	CID3586	5.9067	2658	978	T-cells	T cells CD8+	T_cells_c4_CD8+_ZFP36	HER2+	no_gene_module	no_scTYPER_call	no_inferCNV_call	no_CNA_value
CID3586_CGAGCCAGTCTGATTG	CID3586	3.81304	1626	759	T-cells	T cells CD8+	T_cells_c4_CD8+_ZFP36	HER2+	no_gene_module	no_scTYPER_call	no_inferCNV_call	no_CNA_value
CID3586_CGCTGGAAGTTAGGTA	CID3586	5.06608	1816	789	T-cells	T cells CD8+	T_cells_c4_CD8+_ZFP36	HER2+	no_gene_module	no_scTYPER_call	no_inferCNV_call	no_CNA_value
CID3586_CGTCACTCAGTGAGTG	CID3586	10.0511	1174	564	T-cells	T cells CD8+	T_cells_c4_CD8+_ZFP36	HER2+	no_gene_module	no_scTYPER_call	no_inferCNV_call	no_CNA_value
CID3586_CGTCAGGTCTTGAGAC	CID3586	7.35981	1712	769	T-cells	T cells CD8+	T_cells_c4_CD8+_ZFP36	HER2+	no_gene_module	no_scTYPER_call	no_inferCNV_call	no_CNA_value
CID3586_CGTTAGATCAGCTGGC	CID3586	2.12034	1745	844	T-cells	T cells CD8+	T_cells_c4_CD8+_ZFP36	HER2+	no_gene_module	no_scTYPER_call	no_inferCNV_call	no_CNA_value
CID3586_CTAGCCTAGGGTCTCC	CID3586	8.87324	1420	670	T-cells	T cells CD8+	T_cells_c4_CD8+_ZFP36	HER2+	no_gene_module	no_scTYPER_call	no_inferCNV_call	no_CNA_value
CID3586_CTCGTCAGTTCGGGCT	CID3586	4.09062	1589	905	T-cells	T cells CD8+	T_cells_c4_CD8+_ZFP36	HER2+	no_gene_module	no_scTYPER_call	no_inferCNV_call	no_CNA_value
CID3586_CTTAGGAGTCCGAACC	CID3586	6.94645	2073	873	T-cells	T cells CD8+	T_cells_c4_CD8+_ZFP36	HER2+	no_gene_module	no_scTYPER_call	no_inferCNV_call	no_CNA_value
CID3586_GACCTGGAGCTACCTA	CID3586	4.77941	1088	532	T-cells	T cells CD8+	T_cells_c4_CD8+_ZFP36	HER2+	no_gene_module	no_scTYPER_call	no_inferCNV_call	no_CNA_value
CID3586_GATCGCGCAATCTGCA	CID3586	4.59337	1328	694	T-cells	T cells CD8+	T_cells_c4_CD8+_ZFP36	HER2+	no_gene_module	no_scTYPER_call	no_inferCNV_call	no_CNA_value
CID3586_GCAATCAAGTTACGGG	CID3586	6.14732	1887	759	T-cells	T cells CD8+	T_cells_c4_CD8+_ZFP36	HER2+	no_gene_module	no_scTYPER_call	no_inferCNV_call	no_CNA_value
CID3586_GCCTCTAAGGATGGAA	CID3586	5.56046	2266	1094	T-cells	T cells CD8+	T_cells_c4_CD8+_ZFP36	HER2+	no_gene_module	no_scTYPER_call	no_inferCNV_call	no_CNA_value
CID3586_GGAATAAAGAATCTCC	CID3586	6.59649	1425	609	T-cells	T cells CD8+	T_cells_c4_CD8+_ZFP36	HER2+	no_gene_module	no_scTYPER_call	no_inferCNV_call	no_CNA_value
CID3586_GGCGTGTCACGGTAGA	CID3586	4.95822	1795	778	T-cells	T cells CD8+	T_cells_c4_CD8+_ZFP36	HER2+	no_gene_module	no_scTYPER_call	no_inferCNV_call	no_CNA_value
CID3586_GGGATGATCGGCCGAT	CID3586	4.18006	1244	610	T-cells	T cells CD8+	T_cells_c4_CD8+_ZFP36	HER2+	no_gene_module	no_scTYPER_call	no_inferCNV_call	no_CNA_value
CID3586_GTAACGTTCGTTGCCT	CID3586	4.00972	823	453	T-cells	T cells CD8+	T_cells_c4_CD8+_ZFP36	HER2+	no_gene_module	no_scTYPER_call	no_inferCNV_call	no_CNA_value
CID3586_GTAACTGGTATTACCG	CID3586	4.20219	1642	831	T-cells	T cells CD8+	T_cells_c4_CD8+_ZFP36	HER2+	no_gene_module	no_scTYPER_call	no_inferCNV_call	no_CNA_value
CID3586_TCACGAACATTCGACA	CID3586	5.26316	1064	524	T-cells	T cells CD8+	T_cells_c4_CD8+_ZFP36	HER2+	no_gene_module	no_scTYPER_call	no_inferCNV_call	no_CNA_value
CID3586_TCACGAAGTGACCAAG	CID3586	4.55824	1777	765	T-cells	T cells CD8+	T_cells_c4_CD8+_ZFP36	HER2+	no_gene_module	no_scTYPER_call	no_inferCNV_call	no_CNA_value
CID3586_TGATTTCGTAAGTGGC	CID3586	5.04541	1982	851	T-cells	T cells CD8+	T_cells_c4_CD8+_ZFP36	HER2+	no_gene_module	no_scTYPER_call	no_inferCNV_call	no_CNA_value
CID3586_TGGCGCAAGAGTAATC	CID3586	2.25528	2084	954	T-cells	T cells CD8+	T_cells_c4_CD8+_ZFP36	HER2+	no_gene_module	no_scTYPER_call	no_inferCNV_call	no_CNA_value
CID3586_TGGGAAGGTCACACGC	CID3586	5.93472	1348	670	T-cells	T cells CD8+	T_cells_c4_CD8+_ZFP36	HER2+	no_gene_module	no_scTYPER_call	no_inferCNV_call	no_CNA_value
CID3586_TTAGGCACAGCTCGCA	CID3586	3.93663	2083	850	T-cells	T cells CD8+	T_cells_c4_CD8+_ZFP36	HER2+	no_gene_module	no_scTYPER_call	no_inferCNV_call	no_CNA_value
CID3586_TTAGTTCTCGCGATCG	CID3586	3.69775	2488	963	T-cells	T cells CD8+	T_cells_c4_CD8+_ZFP36	HER2+	no_gene_module	no_scTYPER_call	no_inferCNV_call	no_CNA_value
CID3586_AAATGCCCAAGCCGCT	CID3586	4.20434	2212	853	T-cells	T cells CD8+	T_cells_c4_CD8+_ZFP36	HER2+	no_gene_module	no_scTYPER_call	no_inferCNV_call	no_CNA_value
CID3586_AATCCAGGTAGGAGTC	CID3586	4.90831	1854	757	T-cells	T cells CD8+	T_cells_c4_CD8+_ZFP36	HER2+	no_gene_module	no_scTYPER_call	no_inferCNV_call	no_CNA_value
CID3586_ACTGAACCAGGGAGAG	CID3586	4.33673	1176	495	T-cells	T cells CD8+	T_cells_c4_CD8+_ZFP36	HER2+	no_gene_module	no_scTYPER_call	no_inferCNV_call	no_CNA_value
CID3586_AGATTGCTCAGATAAG	CID3586	5.4401	1636	777	T-cells	T cells CD8+	T_cells_c4_CD8+_ZFP36	HER2+	no_gene_module	no_scTYPER_call	no_inferCNV_call	no_CNA_value
CID3586_GCTGCTTGTCTAAACC	CID3586	3.87258	1601	659	T-cells	T cells CD8+	T_cells_c4_CD8+_ZFP36	HER2+	no_gene_module	no_scTYPER_call	no_inferCNV_call	no_CNA_value
CID3586_ATTATCCTCAAAGACA	CID3586	3.3801	1568	716	T-cells	T cells CD8+	T_cells_c4_CD8+_ZFP36	HER2+	no_gene_module	no_scTYPER_call	no_inferCNV_call	no_CNA_value
CID3586_ATTGGACGTTCGCTAA	CID3586	4.59184	1176	538	T-cells	T cells CD8+	T_cells_c4_CD8+_ZFP36	HER2+	no_gene_module	no_scTYPER_call	no_inferCNV_call	no_CNA_value
CID3586_CATTCGCAGACGACGT	CID3586	5.03226	775	403	T-cells	T cells CD8+	T_cells_c4_CD8+_ZFP36	HER2+	no_gene_module	no_scTYPER_call	no_inferCNV_call	no_CNA_value
CID3586_CTCTACGCATGGTCTA	CID3586	4.86111	864	411	T-cells	T cells CD8+	T_cells_c4_CD8+_ZFP36	HER2+	no_gene_module	no_scTYPER_call	no_inferCNV_call	no_CNA_value
CID3586_GATCAGTAGGATATAC	CID3586	6.05882	1700	688	T-cells	T cells CD8+	T_cells_c4_CD8+_ZFP36	HER2+	no_gene_module	no_scTYPER_call	no_inferCNV_call	no_CNA_value
CID3586_TAAGCGTGTACGCTGC	CID3586	6.26921	1627	625	T-cells	T cells CD8+	T_cells_c4_CD8+_ZFP36	HER2+	no_gene_module	no_scTYPER_call	no_inferCNV_call	no_CNA_value
CID3586_GTGGGTCAGTGAACGC	CID3586	6.03368	2138	814	T-cells	T cells CD8+	T_cells_c4_CD8+_ZFP36	HER2+	no_gene_module	no_scTYPER_call	no_inferCNV_call	no_CNA_value
CID3586_GGAATAATCACCATAG	CID3586	4.0567	2046	809	T-cells	T cells CD8+	T_cells_c4_CD8+_ZFP36	HER2+	no_gene_module	no_scTYPER_call	no_inferCNV_call	no_CNA_value
CID3586_CTGCCTAAGATAGCAT	CID3586	6.52566	3877	1212	T-cells	T cells CD8+	T_cells_c4_CD8+_ZFP36	HER2+	no_gene_module	no_scTYPER_call	no_inferCNV_call	no_CNA_value
CID3586_GACTACATCCTACAGA	CID3586	3.91677	817	509	T-cells	T cells CD8+	T_cells_c4_CD8+_ZFP36	HER2+	no_gene_module	no_scTYPER_call	no_inferCNV_call	no_CNA_value
CID3586_AACTCAGGTGGTAACG	CID3586	7.30287	2232	805	T-cells	T cells CD8+	T_cells_c4_CD8+_ZFP36	HER2+	no_gene_module	no_scTYPER_call	no_inferCNV_call	no_CNA_value
CID3586_AACTCCCAGGTAAACT	CID3586	7.36067	1902	727	T-cells	T cells CD8+	T_cells_c4_CD8+_ZFP36	HER2+	no_gene_module	no_scTYPER_call	no_inferCNV_call	no_CNA_value
CID3586_ACGGGCTTCCCATTTA	CID3586	6.42424	1650	666	T-cells	T cells CD8+	T_cells_c4_CD8+_ZFP36	HER2+	no_gene_module	no_scTYPER_call	no_inferCNV_call	no_CNA_value
CID3586_AGTGGGACAAGCGAGT	CID3586	7.43322	861	474	T-cells	T cells CD8+	T_cells_c4_CD8+_ZFP36	HER2+	no_gene_module	no_scTYPER_call	no_inferCNV_call	no_CNA_value
CID3586_ATAGACCGTTGCTCCT	CID3586	8.36272	1985	782	T-cells	T cells CD8+	T_cells_c4_CD8+_ZFP36	HER2+	no_gene_module	no_scTYPER_call	no_inferCNV_call	no_CNA_value
CID3586_CATCAAGCATTCCTGC	CID3586	8.09769	778	415	T-cells	T cells CD8+	T_cells_c4_CD8+_ZFP36	HER2+	no_gene_module	no_scTYPER_call	no_inferCNV_call	no_CNA_value
CID3586_CCAATCCTCATATCGG	CID3586	3.80886	1444	661	T-cells	T cells CD8+	T_cells_c4_CD8+_ZFP36	HER2+	no_gene_module	no_scTYPER_call	no_inferCNV_call	no_CNA_value
CID3586_CGGTTAATCATCGCTC	CID3586	6.2211	2379	801	T-cells	T cells CD8+	T_cells_c4_CD8+_ZFP36	HER2+	no_gene_module	no_scTYPER_call	no_inferCNV_call	no_CNA_value
CID3586_GCTGGGTAGTAGTGCG	CID3586	3.78585	2615	1075	T-cells	T cells CD8+	T_cells_c4_CD8+_ZFP36	HER2+	no_gene_module	no_scTYPER_call	no_inferCNV_call	no_CNA_value
CID3586_GGGCATCCATGGTCAT	CID3586	5.39466	1761	776	T-cells	T cells CD8+	T_cells_c4_CD8+_ZFP36	HER2+	no_gene_module	no_scTYPER_call	no_inferCNV_call	no_CNA_value
CID3586_GGTGAAGCAAGTAATG	CID3586	5.77582	2043	869	T-cells	T cells CD8+	T_cells_c4_CD8+_ZFP36	HER2+	no_gene_module	no_scTYPER_call	no_inferCNV_call	no_CNA_value
CID3586_GTGTGCGCACCACGTG	CID3586	7.11262	2362	968	T-cells	T cells CD8+	T_cells_c4_CD8+_ZFP36	HER2+	no_gene_module	no_scTYPER_call	no_inferCNV_call	no_CNA_value
CID3586_GTGTTAGGTTGGGACA	CID3586	5.54162	3988	1226	T-cells	T cells CD8+	T_cells_c4_CD8+_ZFP36	HER2+	no_gene_module	no_scTYPER_call	no_inferCNV_call	no_CNA_value
CID3586_TACGGATTCTGTCTCG	CID3586	4.08468	4015	1346	T-cells	T cells CD8+	T_cells_c4_CD8+_ZFP36	HER2+	no_gene_module	no_scTYPER_call	no_inferCNV_call	no_CNA_value
CID3586_TGAGCCGTCAGTGCAT	CID3586	7.1708	1534	704	T-cells	T cells CD8+	T_cells_c4_CD8+_ZFP36	HER2+	no_gene_module	no_scTYPER_call	no_inferCNV_call	no_CNA_value
CID3586_TTCTCAAGTCGCATAT	CID3586	5.2679	2221	868	T-cells	T cells CD8+	T_cells_c4_CD8+_ZFP36	HER2+	no_gene_module	no_scTYPER_call	no_inferCNV_call	no_CNA_value
CID3586_TTGCGTCTCGAGAGCA	CID3586	8.78418	1719	574	T-cells	T cells CD8+	T_cells_c4_CD8+_ZFP36	HER2+	no_gene_module	no_scTYPER_call	no_inferCNV_call	no_CNA_value
CID3586_AAGCCGCTCGCCTGAG	CID3586	3.40136	1323	649	T-cells	T cells CD8+	T_cells_c4_CD8+_ZFP36	HER2+	no_gene_module	no_scTYPER_call	no_inferCNV_call	no_CNA_value
CID3586_GCAATCAAGTGGAGTC	CID3586	5.29023	1361	596	T-cells	T cells CD8+	T_cells_c4_CD8+_ZFP36	HER2+	no_gene_module	no_scTYPER_call	no_inferCNV_call	no_CNA_value
CID3586_GTGCGGTTCGGAGGTA	CID3586	3.52304	1476	656	T-cells	T cells CD8+	T_cells_c4_CD8+_ZFP36	HER2+	no_gene_module	no_scTYPER_call	no_inferCNV_call	no_CNA_value
CID3586_TGGACGCCATGGGAAC	CID3586	5.57185	2046	769	T-cells	T cells CD8+	T_cells_c4_CD8+_ZFP36	HER2+	no_gene_module	no_scTYPER_call	no_inferCNV_call	no_CNA_value
CID3586_CCTAAAGGTTGGTTTG	CID3586	6.78643	1503	502	T-cells	T cells CD8+	T_cells_c4_CD8+_ZFP36	HER2+	no_gene_module	no_scTYPER_call	no_inferCNV_call	no_CNA_value
CID3586_AAGGCAGAGCCACTAT	CID3586	6.49973	1877	710	T-cells	T cells CD8+	T_cells_c4_CD8+_ZFP36	HER2+	no_gene_module	no_scTYPER_call	no_inferCNV_call	no_CNA_value
CID3586_ACGCCAGGTAAACCTC	CID3586	6.63729	3631	1225	T-cells	T cells CD8+	T_cells_c4_CD8+_ZFP36	HER2+	no_gene_module	no_scTYPER_call	no_inferCNV_call	no_CNA_value
CID3586_ACGGGCTTCTGATTCT	CID3586	3.1861	2762	1086	T-cells	T cells CD8+	T_cells_c4_CD8+_ZFP36	HER2+	no_gene_module	no_scTYPER_call	no_inferCNV_call	no_CNA_value
CID3586_ACTATCTTCCTCTAGC	CID3586	5.79065	3592	1155	T-cells	T cells CD8+	T_cells_c4_CD8+_ZFP36	HER2+	no_gene_module	no_scTYPER_call	no_inferCNV_call	no_CNA_value
CID3586_AGGCCACCATGTTCCC	CID3586	4.60805	1888	808	T-cells	T cells CD8+	T_cells_c4_CD8+_ZFP36	HER2+	no_gene_module	no_scTYPER_call	no_inferCNV_call	no_CNA_value
CID3586_AGGGAGTCACCACGTG	CID3586	6.60606	1650	655	T-cells	T cells CD8+	T_cells_c4_CD8+_ZFP36	HER2+	no_gene_module	no_scTYPER_call	no_inferCNV_call	no_CNA_value
CID3586_AGGGAGTTCCATGAAC	CID3586	7.79137	1553	666	T-cells	T cells CD8+	T_cells_c4_CD8+_ZFP36	HER2+	no_gene_module	no_scTYPER_call	no_inferCNV_call	no_CNA_value
CID3586_AGTCTTTGTATATGAG	CID3586	3.46908	4641	1543	T-cells	T cells CD8+	T_cells_c4_CD8+_ZFP36	HER2+	no_gene_module	no_scTYPER_call	no_inferCNV_call	no_CNA_value
CID3586_ATCCGAAAGTTCGCGC	CID3586	4.47761	1005	496	T-cells	T cells CD8+	T_cells_c4_CD8+_ZFP36	HER2+	no_gene_module	no_scTYPER_call	no_inferCNV_call	no_CNA_value
CID3586_ATTGGACCAGAAGCAC	CID3586	2.2029	1725	777	T-cells	T cells CD8+	T_cells_c4_CD8+_ZFP36	HER2+	no_gene_module	no_scTYPER_call	no_inferCNV_call	no_CNA_value
CID3586_CACATAGAGCGTTTAC	CID3586	3.90969	1816	751	T-cells	T cells CD8+	T_cells_c4_CD8+_ZFP36	HER2+	no_gene_module	no_scTYPER_call	no_inferCNV_call	no_CNA_value
CID3586_CACCTTGTCTTCATGT	CID3586	4.8732	2011	784	T-cells	T cells CD8+	T_cells_c4_CD8+_ZFP36	HER2+	no_gene_module	no_scTYPER_call	no_inferCNV_call	no_CNA_value
CID3586_CATCAGAGTTACGCGC	CID3586	7.18358	2631	855	T-cells	T cells CD8+	T_cells_c4_CD8+_ZFP36	HER2+	no_gene_module	no_scTYPER_call	no_inferCNV_call	no_CNA_value
CID3586_CATGACACACGAGGTA	CID3586	4.38766	2074	758	T-cells	T cells CD8+	T_cells_c4_CD8+_ZFP36	HER2+	no_gene_module	no_scTYPER_call	no_inferCNV_call	no_CNA_value
CID3586_CATGGCGCAGTATCTG	CID3586	5.83742	1833	678	T-cells	T cells CD8+	T_cells_c4_CD8+_ZFP36	HER2+	no_gene_module	no_scTYPER_call	no_inferCNV_call	no_CNA_value
CID3586_CATGGCGTCAGAGCTT	CID3586	5.0536	1959	775	T-cells	T cells CD8+	T_cells_c4_CD8+_ZFP36	HER2+	no_gene_module	no_scTYPER_call	no_inferCNV_call	no_CNA_value
CID3586_CCATGTCGTCTTTCAT	CID3586	3.72466	2121	966	T-cells	T cells CD8+	T_cells_c4_CD8+_ZFP36	HER2+	no_gene_module	no_scTYPER_call	no_inferCNV_call	no_CNA_value
CID3586_CCGGTAGCATTTCAGG	CID3586	2.85836	2344	984	T-cells	T cells CD8+	T_cells_c4_CD8+_ZFP36	HER2+	no_gene_module	no_scTYPER_call	no_inferCNV_call	no_CNA_value
CID3586_CCTAAAGCAGCGTTCG	CID3586	6.00084	4766	1415	T-cells	T cells CD8+	T_cells_c4_CD8+_ZFP36	HER2+	no_gene_module	no_scTYPER_call	no_inferCNV_call	no_CNA_value
CID3586_CCTACCAAGGTTACCT	CID3586	3.28032	2012	796	T-cells	T cells CD8+	T_cells_c4_CD8+_ZFP36	HER2+	no_gene_module	no_scTYPER_call	no_inferCNV_call	no_CNA_value
CID3586_CCTCAGTAGAGAGCTC	CID3586	6.96238	1781	728	T-cells	T cells CD8+	T_cells_c4_CD8+_ZFP36	HER2+	no_gene_module	no_scTYPER_call	no_inferCNV_call	no_CNA_value
CID3586_CGATGGCAGGAATTAC	CID3586	5.0694	1657	705	T-cells	T cells CD8+	T_cells_c4_CD8+_ZFP36	HER2+	no_gene_module	no_scTYPER_call	no_inferCNV_call	no_CNA_value
CID3586_CGGACACTCATCACCC	CID3586	8.17528	1529	655	T-cells	T cells CD8+	T_cells_c4_CD8+_ZFP36	HER2+	no_gene_module	no_scTYPER_call	no_inferCNV_call	no_CNA_value
CID3586_CGGCTAGAGTCGCCGT	CID3586	6.65939	916	497	T-cells	T cells CD8+	T_cells_c4_CD8+_ZFP36	HER2+	no_gene_module	no_scTYPER_call	no_inferCNV_call	no_CNA_value
CID3586_CGTCTACGTCTCATCC	CID3586	4.99168	1202	590	T-cells	T cells CD8+	T_cells_c4_CD8+_ZFP36	HER2+	no_gene_module	no_scTYPER_call	no_inferCNV_call	no_CNA_value
CID3586_CGTGTAACATATACGC	CID3586	5.16836	1277	592	T-cells	T cells CD8+	T_cells_c4_CD8+_ZFP36	HER2+	no_gene_module	no_scTYPER_call	no_inferCNV_call	no_CNA_value
CID3586_CGTTAGATCCGCAGTG	CID3586	7.56538	3212	1077	T-cells	T cells CD8+	T_cells_c4_CD8+_ZFP36	HER2+	no_gene_module	no_scTYPER_call	no_inferCNV_call	no_CNA_value
CID3586_CGTTAGATCTGTCCGT	CID3586	3.13704	1817	821	T-cells	T cells CD8+	T_cells_c4_CD8+_ZFP36	HER2+	no_gene_module	no_scTYPER_call	no_inferCNV_call	no_CNA_value
CID3586_CTACCCAGTGAACCTT	CID3586	4.99883	4281	1322	T-cells	T cells CD8+	T_cells_c4_CD8+_ZFP36	HER2+	no_gene_module	no_scTYPER_call	no_inferCNV_call	no_CNA_value
CID3586_CTGTTTAGTGATGTCT	CID3586	6.49503	1709	699	T-cells	T cells CD8+	T_cells_c4_CD8+_ZFP36	HER2+	no_gene_module	no_scTYPER_call	no_inferCNV_call	no_CNA_value
CID3586_CTTACCGAGCCACCTG	CID3586	4.37724	2513	1233	T-cells	T cells CD8+	T_cells_c4_CD8+_ZFP36	HER2+	no_gene_module	no_scTYPER_call	no_inferCNV_call	no_CNA_value
CID3586_CTTAGGATCCCATTTA	CID3586	6.11536	1439	606	T-cells	T cells CD8+	T_cells_c4_CD8+_ZFP36	HER2+	no_gene_module	no_scTYPER_call	no_inferCNV_call	no_CNA_value
CID3586_GAAATGAGTAAGTGGC	CID3586	4.28327	1751	785	T-cells	T cells CD8+	T_cells_c4_CD8+_ZFP36	HER2+	no_gene_module	no_scTYPER_call	no_inferCNV_call	no_CNA_value
CID3586_GAATAAGTCCTTTCTC	CID3586	4.18354	1482	653	T-cells	T cells CD8+	T_cells_c4_CD8+_ZFP36	HER2+	no_gene_module	no_scTYPER_call	no_inferCNV_call	no_CNA_value
CID3586_GACGTTAAGGGATCTG	CID3586	3.28893	2402	931	T-cells	T cells CD8+	T_cells_c4_CD8+_ZFP36	HER2+	no_gene_module	no_scTYPER_call	no_inferCNV_call	no_CNA_value
CID3586_GATGAGGGTGCTCTTC	CID3586	5.71914	1766	732	T-cells	T cells CD8+	T_cells_c4_CD8+_ZFP36	HER2+	no_gene_module	no_scTYPER_call	no_inferCNV_call	no_CNA_value
CID3586_GCAGTTAAGGGAGTAA	CID3586	6.37643	2274	762	T-cells	T cells CD8+	T_cells_c4_CD8+_ZFP36	HER2+	no_gene_module	no_scTYPER_call	no_inferCNV_call	no_CNA_value
CID3586_GCTCCTATCCGTAGTA	CID3586	2.16837	1568	708	T-cells	T cells CD8+	T_cells_c4_CD8+_ZFP36	HER2+	no_gene_module	no_scTYPER_call	no_inferCNV_call	no_CNA_value
CID3586_GCTGGGTCAGTAAGAT	CID3586	5.03432	1748	770	T-cells	T cells CD8+	T_cells_c4_CD8+_ZFP36	HER2+	no_gene_module	no_scTYPER_call	no_inferCNV_call	no_CNA_value
CID3586_GGGCATCTCATGCAAC	CID3586	5.20386	3728	1449	T-cells	T cells CD8+	T_cells_c4_CD8+_ZFP36	HER2+	no_gene_module	no_scTYPER_call	no_inferCNV_call	no_CNA_value
CID3586_GGTGAAGTCTGCCAGG	CID3586	3.21467	4635	1658	T-cells	T cells CD8+	T_cells_c4_CD8+_ZFP36	HER2+	no_gene_module	no_scTYPER_call	no_inferCNV_call	no_CNA_value
CID3586_GTAGGCCGTCACACGC	CID3586	6.53647	2509	787	T-cells	T cells CD8+	T_cells_c4_CD8+_ZFP36	HER2+	no_gene_module	no_scTYPER_call	no_inferCNV_call	no_CNA_value
CID3586_GTCACGGAGGTAGCTG	CID3586	5.67885	1532	693	T-cells	T cells CD8+	T_cells_c4_CD8+_ZFP36	HER2+	no_gene_module	no_scTYPER_call	no_inferCNV_call	no_CNA_value
CID3586_GTGTTAGCATGGGACA	CID3586	2.87853	1737	713	T-cells	T cells CD8+	T_cells_c4_CD8+_ZFP36	HER2+	no_gene_module	no_scTYPER_call	no_inferCNV_call	no_CNA_value
CID3586_TCAGCTCAGGATATAC	CID3586	3.90545	1946	786	T-cells	T cells CD8+	T_cells_c4_CD8+_ZFP36	HER2+	no_gene_module	no_scTYPER_call	no_inferCNV_call	no_CNA_value
CID3586_TCATTACGTAGTACCT	CID3586	3.67057	4359	1583	T-cells	T cells CD8+	T_cells_c4_CD8+_ZFP36	HER2+	no_gene_module	no_scTYPER_call	no_inferCNV_call	no_CNA_value
CID3586_TCGCGTTTCACCTCGT	CID3586	4.18919	1480	668	T-cells	T cells CD8+	T_cells_c4_CD8+_ZFP36	HER2+	no_gene_module	no_scTYPER_call	no_inferCNV_call	no_CNA_value
CID3586_TCGGGACGTCACTGGC	CID3586	3.58423	1953	680	T-cells	T cells CD8+	T_cells_c4_CD8+_ZFP36	HER2+	no_gene_module	no_scTYPER_call	no_inferCNV_call	no_CNA_value
CID3586_TCGTACCGTCAATACC	CID3586	4.71698	1272	575	T-cells	T cells CD8+	T_cells_c4_CD8+_ZFP36	HER2+	no_gene_module	no_scTYPER_call	no_inferCNV_call	no_CNA_value
CID3586_TGCGCAGGTCAACATC	CID3586	5.19089	2986	1055	T-cells	T cells CD8+	T_cells_c4_CD8+_ZFP36	HER2+	no_gene_module	no_scTYPER_call	no_inferCNV_call	no_CNA_value
CID3586_TGCTGCTAGCAGATCG	CID3586	2.18516	1739	800	T-cells	T cells CD8+	T_cells_c4_CD8+_ZFP36	HER2+	no_gene_module	no_scTYPER_call	no_inferCNV_call	no_CNA_value
CID3586_TGTCCCAAGTTCGATC	CID3586	5.50948	1688	632	T-cells	T cells CD8+	T_cells_c4_CD8+_ZFP36	HER2+	no_gene_module	no_scTYPER_call	no_inferCNV_call	no_CNA_value
CID3586_TGTGGTATCGCCATAA	CID3586	4.41684	2898	1177	T-cells	T cells CD8+	T_cells_c4_CD8+_ZFP36	HER2+	no_gene_module	no_scTYPER_call	no_inferCNV_call	no_CNA_value
CID3586_TTCTCAACAGTCCTTC	CID3586	4.55385	1625	729	T-cells	T cells CD8+	T_cells_c4_CD8+_ZFP36	HER2+	no_gene_module	no_scTYPER_call	no_inferCNV_call	no_CNA_value
CID3586_AAAGATGCAGTATGCT	CID3586	3.7594	2261	951	T-cells	T cells CD8+	T_cells_c4_CD8+_ZFP36	HER2+	no_gene_module	no_scTYPER_call	no_inferCNV_call	no_CNA_value
CID3586_AAATGCCTCTGAAAGA	CID3586	4.7802	2343	984	T-cells	T cells CD8+	T_cells_c4_CD8+_ZFP36	HER2+	no_gene_module	no_scTYPER_call	no_inferCNV_call	no_CNA_value
CID3586_AACCGCGTCTCGCATC	CID3586	2.95464	2403	948	T-cells	T cells CD8+	T_cells_c4_CD8+_ZFP36	HER2+	no_gene_module	no_scTYPER_call	no_inferCNV_call	no_CNA_value
CID3586_AACTCCCTCACTCCTG	CID3586	2.65604	2259	1100	T-cells	T cells CD8+	T_cells_c4_CD8+_ZFP36	HER2+	no_gene_module	no_scTYPER_call	no_inferCNV_call	no_CNA_value
CID3586_ACAGCTATCTGCGGCA	CID3586	4.22078	1848	878	T-cells	T cells CD8+	T_cells_c4_CD8+_ZFP36	HER2+	no_gene_module	no_scTYPER_call	no_inferCNV_call	no_CNA_value
CID3586_ACCTTTATCGTCCAGG	CID3586	2.73973	1898	755	T-cells	T cells CD8+	T_cells_c4_CD8+_ZFP36	HER2+	no_gene_module	no_scTYPER_call	no_inferCNV_call	no_CNA_value
CID3586_ACGAGCCGTAGCTGCC	CID3586	5.7	2000	908	T-cells	T cells CD8+	T_cells_c4_CD8+_ZFP36	HER2+	no_gene_module	no_scTYPER_call	no_inferCNV_call	no_CNA_value
CID3586_ACGAGCCTCATCGCTC	CID3586	5.51609	2393	1003	T-cells	T cells CD8+	T_cells_c4_CD8+_ZFP36	HER2+	no_gene_module	no_scTYPER_call	no_inferCNV_call	no_CNA_value
CID3586_ACGAGGATCATTATCC	CID3586	6.71395	2115	837	T-cells	T cells CD8+	T_cells_c4_CD8+_ZFP36	HER2+	no_gene_module	no_scTYPER_call	no_inferCNV_call	no_CNA_value
CID3586_ACGCAGCAGCCAGGAT	CID3586	4.84682	2187	951	T-cells	T cells CD8+	T_cells_c4_CD8+_ZFP36	HER2+	no_gene_module	no_scTYPER_call	no_inferCNV_call	no_CNA_value
CID3586_ACGCCAGTCCACGACG	CID3586	4.43925	1712	831	T-cells	T cells CD8+	T_cells_c4_CD8+_ZFP36	HER2+	no_gene_module	no_scTYPER_call	no_inferCNV_call	no_CNA_value
CID3586_ACGGCCAAGACTACAA	CID3586	2.7684	1481	666	T-cells	T cells CD8+	T_cells_c4_CD8+_ZFP36	HER2+	no_gene_module	no_scTYPER_call	no_inferCNV_call	no_CNA_value
CID3586_ACTGTCCAGATCCGAG	CID3586	3.55419	2279	1023	T-cells	T cells CD8+	T_cells_c4_CD8+_ZFP36	HER2+	no_gene_module	no_scTYPER_call	no_inferCNV_call	no_CNA_value
CID3586_AGCCTAACATTGTGCA	CID3586	4.3402	2281	1078	T-cells	T cells CD8+	T_cells_c4_CD8+_ZFP36	HER2+	no_gene_module	no_scTYPER_call	no_inferCNV_call	no_CNA_value
CID3586_AGGCCGTCAGGCGATA	CID3586	3.81901	2409	992	T-cells	T cells CD8+	T_cells_c4_CD8+_ZFP36	HER2+	no_gene_module	no_scTYPER_call	no_inferCNV_call	no_CNA_value
CID3586_AGGGATGAGGCGTACA	CID3586	2.14247	1867	778	T-cells	T cells CD8+	T_cells_c4_CD8+_ZFP36	HER2+	no_gene_module	no_scTYPER_call	no_inferCNV_call	no_CNA_value
CID3586_AGGGATGCATGGAATA	CID3586	6.06732	2258	860	T-cells	T cells CD8+	T_cells_c4_CD8+_ZFP36	HER2+	no_gene_module	no_scTYPER_call	no_inferCNV_call	no_CNA_value
CID3586_AGGGTGAGTGTCAATC	CID3586	4.09722	1440	646	T-cells	T cells CD8+	T_cells_c4_CD8+_ZFP36	HER2+	no_gene_module	no_scTYPER_call	no_inferCNV_call	no_CNA_value
CID3586_AGGTCATCAATCCGAT	CID3586	3.23432	3030	1159	T-cells	T cells CD8+	T_cells_c4_CD8+_ZFP36	HER2+	no_gene_module	no_scTYPER_call	no_inferCNV_call	no_CNA_value
CID3586_AGGTCCGCACCGTTGG	CID3586	5.18746	4241	1480	T-cells	T cells CD8+	T_cells_c4_CD8+_ZFP36	HER2+	no_gene_module	no_scTYPER_call	no_inferCNV_call	no_CNA_value
CID3586_AGTGAGGAGTGTTGAA	CID3586	2.66915	1611	711	T-cells	T cells CD8+	T_cells_c4_CD8+_ZFP36	HER2+	no_gene_module	no_scTYPER_call	no_inferCNV_call	no_CNA_value
CID3586_AGTGAGGTCGCGTAGC	CID3586	4.68432	1473	604	T-cells	T cells CD8+	T_cells_c4_CD8+_ZFP36	HER2+	no_gene_module	no_scTYPER_call	no_inferCNV_call	no_CNA_value
CID3586_AGTGGGATCACTGGGC	CID3586	6.16209	1493	734	T-cells	T cells CD8+	T_cells_c4_CD8+_ZFP36	HER2+	no_gene_module	no_scTYPER_call	no_inferCNV_call	no_CNA_value
CID3586_ATAAGAGTCTGTGCAA	CID3586	5.02229	3365	1118	T-cells	T cells CD8+	T_cells_c4_CD8+_ZFP36	HER2+	no_gene_module	no_scTYPER_call	no_inferCNV_call	no_CNA_value
CID3586_ATCCACCAGAGTTGGC	CID3586	5.60432	1481	595	T-cells	T cells CD8+	T_cells_c4_CD8+_ZFP36	HER2+	no_gene_module	no_scTYPER_call	no_inferCNV_call	no_CNA_value
CID3586_ATCTACTCATAAAGGT	CID3586	9.64696	2436	866	T-cells	T cells CD8+	T_cells_c4_CD8+_ZFP36	HER2+	no_gene_module	no_scTYPER_call	no_inferCNV_call	no_CNA_value
CID3586_ATTATCCTCTGGCGAC	CID3586	3.80906	2074	870	T-cells	T cells CD8+	T_cells_c4_CD8+_ZFP36	HER2+	no_gene_module	no_scTYPER_call	no_inferCNV_call	no_CNA_value
CID3586_ATTGGACAGTCGATAA	CID3586	5.58511	1880	890	T-cells	T cells CD8+	T_cells_c4_CD8+_ZFP36	HER2+	no_gene_module	no_scTYPER_call	no_inferCNV_call	no_CNA_value
CID3586_ATTGGACGTAGGAGTC	CID3586	3.53925	1554	727	T-cells	T cells CD8+	T_cells_c4_CD8+_ZFP36	HER2+	no_gene_module	no_scTYPER_call	no_inferCNV_call	no_CNA_value
CID3586_ATTGGTGGTTACTGAC	CID3586	10.4828	2900	1164	T-cells	T cells CD8+	T_cells_c4_CD8+_ZFP36	HER2+	no_gene_module	no_scTYPER_call	no_inferCNV_call	no_CNA_value
CID3586_CACAAACAGTGCAAGC	CID3586	4.64286	1400	682	T-cells	T cells CD8+	T_cells_c4_CD8+_ZFP36	HER2+	no_gene_module	no_scTYPER_call	no_inferCNV_call	no_CNA_value
CID3586_CACACCTCATGCGCAC	CID3586	4.20432	2545	1059	T-cells	T cells CD8+	T_cells_c4_CD8+_ZFP36	HER2+	no_gene_module	no_scTYPER_call	no_inferCNV_call	no_CNA_value
CID3586_CACCAGGTCACCCGAG	CID3586	6.45973	2384	1061	T-cells	T cells CD8+	T_cells_c4_CD8+_ZFP36	HER2+	no_gene_module	no_scTYPER_call	no_inferCNV_call	no_CNA_value
CID3586_CAGAATCTCAGATAAG	CID3586	2.64669	4005	1453	T-cells	T cells CD8+	T_cells_c4_CD8+_ZFP36	HER2+	no_gene_module	no_scTYPER_call	no_inferCNV_call	no_CNA_value
CID3586_CAGATCATCAGCGACC	CID3586	4.16947	2974	788	T-cells	T cells CD8+	T_cells_c4_CD8+_ZFP36	HER2+	no_gene_module	no_scTYPER_call	no_inferCNV_call	no_CNA_value
CID3586_CAGCGACTCCTAGAAC	CID3586	6.26072	2332	865	T-cells	T cells CD8+	T_cells_c4_CD8+_ZFP36	HER2+	no_gene_module	no_scTYPER_call	no_inferCNV_call	no_CNA_value
CID3586_CAGCTAATCAACCAAC	CID3586	5.26829	2050	927	T-cells	T cells CD8+	T_cells_c4_CD8+_ZFP36	HER2+	no_gene_module	no_scTYPER_call	no_inferCNV_call	no_CNA_value
CID3586_CATCAGATCAATCTCT	CID3586	6.34417	2522	936	T-cells	T cells CD8+	T_cells_c4_CD8+_ZFP36	HER2+	no_gene_module	no_scTYPER_call	no_inferCNV_call	no_CNA_value
CID3586_CATTATCGTAGCAAAT	CID3586	5.78546	2489	955	T-cells	T cells CD8+	T_cells_c4_CD8+_ZFP36	HER2+	no_gene_module	no_scTYPER_call	no_inferCNV_call	no_CNA_value
CID3586_CCACGGACATTTCACT	CID3586	8.81148	976	557	T-cells	T cells CD8+	T_cells_c4_CD8+_ZFP36	HER2+	no_gene_module	no_scTYPER_call	no_inferCNV_call	no_CNA_value
CID3586_CCATGTCGTCACACGC	CID3586	7.59952	1658	757	T-cells	T cells CD8+	T_cells_c4_CD8+_ZFP36	HER2+	no_gene_module	no_scTYPER_call	no_inferCNV_call	no_CNA_value
CID3586_CCATGTCGTTACTGAC	CID3586	2.5784	1435	636	T-cells	T cells CD8+	T_cells_c4_CD8+_ZFP36	HER2+	no_gene_module	no_scTYPER_call	no_inferCNV_call	no_CNA_value
CID3586_CCATGTCTCTAACTCT	CID3586	4.69822	2916	1175	T-cells	T cells CD8+	T_cells_c4_CD8+_ZFP36	HER2+	no_gene_module	no_scTYPER_call	no_inferCNV_call	no_CNA_value
CID3586_CCCAATCCAGACACTT	CID3586	4.85106	1175	577	T-cells	T cells CD8+	T_cells_c4_CD8+_ZFP36	HER2+	no_gene_module	no_scTYPER_call	no_inferCNV_call	no_CNA_value
CID3586_CCCTCCTGTCTAGTCA	CID3586	4.98008	1506	704	T-cells	T cells CD8+	T_cells_c4_CD8+_ZFP36	HER2+	no_gene_module	no_scTYPER_call	no_inferCNV_call	no_CNA_value
CID3586_CCTAGCTTCCGCGCAA	CID3586	6.96798	1593	771	T-cells	T cells CD8+	T_cells_c4_CD8+_ZFP36	HER2+	no_gene_module	no_scTYPER_call	no_inferCNV_call	no_CNA_value
CID3586_CCTATTACATCCTTGC	CID3586	2.71623	1399	700	T-cells	T cells CD8+	T_cells_c4_CD8+_ZFP36	HER2+	no_gene_module	no_scTYPER_call	no_inferCNV_call	no_CNA_value
CID3586_CCTCAGTCAGCTTCGG	CID3586	3.12062	2852	1030	T-cells	T cells CD8+	T_cells_c4_CD8+_ZFP36	HER2+	no_gene_module	no_scTYPER_call	no_inferCNV_call	no_CNA_value
CID3586_CGAATGTAGCTGATAA	CID3586	4.52991	1170	548	T-cells	T cells CD8+	T_cells_c4_CD8+_ZFP36	HER2+	no_gene_module	no_scTYPER_call	no_inferCNV_call	no_CNA_value
CID3586_CGACTTCCATAAGACA	CID3586	4.32243	1712	738	T-cells	T cells CD8+	T_cells_c4_CD8+_ZFP36	HER2+	no_gene_module	no_scTYPER_call	no_inferCNV_call	no_CNA_value
CID3586_CGATGGCTCTGTTGAG	CID3586	4.71204	2101	996	T-cells	T cells CD8+	T_cells_c4_CD8+_ZFP36	HER2+	no_gene_module	no_scTYPER_call	no_inferCNV_call	no_CNA_value
CID3586_CGCCAAGTCTTAGAGC	CID3586	3.47413	4001	1263	T-cells	T cells CD8+	T_cells_c4_CD8+_ZFP36	HER2+	no_gene_module	no_scTYPER_call	no_inferCNV_call	no_CNA_value
CID3586_CGCGGTATCCTCATTA	CID3586	2.88411	1907	745	T-cells	T cells CD8+	T_cells_c4_CD8+_ZFP36	HER2+	no_gene_module	no_scTYPER_call	no_inferCNV_call	no_CNA_value
CID3586_CGCTTCAAGACTAGGC	CID3586	4.68785	4437	1582	T-cells	T cells CD8+	T_cells_c4_CD8+_ZFP36	HER2+	no_gene_module	no_scTYPER_call	no_inferCNV_call	no_CNA_value
CID3586_CGGGTCACATCAGTCA	CID3586	2.49723	1802	831	T-cells	T cells CD8+	T_cells_c4_CD8+_ZFP36	HER2+	no_gene_module	no_scTYPER_call	no_inferCNV_call	no_CNA_value
CID3586_CGTCACTTCGGAATCT	CID3586	4.99709	1721	857	T-cells	T cells CD8+	T_cells_c4_CD8+_ZFP36	HER2+	no_gene_module	no_scTYPER_call	no_inferCNV_call	no_CNA_value
CID3586_CTACACCGTCATTAGC	CID3586	5.38012	1710	830	T-cells	T cells CD8+	T_cells_c4_CD8+_ZFP36	HER2+	no_gene_module	no_scTYPER_call	no_inferCNV_call	no_CNA_value
CID3586_CTACATTGTCAGAATA	CID3586	7.76575	1571	820	T-cells	T cells CD8+	T_cells_c4_CD8+_ZFP36	HER2+	no_gene_module	no_scTYPER_call	no_inferCNV_call	no_CNA_value
CID3586_CTAGCCTTCGCTAGCG	CID3586	4.92424	1848	812	T-cells	T cells CD8+	T_cells_c4_CD8+_ZFP36	HER2+	no_gene_module	no_scTYPER_call	no_inferCNV_call	no_CNA_value
CID3586_CTCGGGAGTTTAGGAA	CID3586	5.13812	1810	918	T-cells	T cells CD8+	T_cells_c4_CD8+_ZFP36	HER2+	no_gene_module	no_scTYPER_call	no_inferCNV_call	no_CNA_value
CID3586_CTCGTACAGTCCAGGA	CID3586	3.97325	2542	986	T-cells	T cells CD8+	T_cells_c4_CD8+_ZFP36	HER2+	no_gene_module	no_scTYPER_call	no_inferCNV_call	no_CNA_value
CID3586_CTCGTACGTCAATGTC	CID3586	4.70865	1699	811	T-cells	T cells CD8+	T_cells_c4_CD8+_ZFP36	HER2+	no_gene_module	no_scTYPER_call	no_inferCNV_call	no_CNA_value
CID3586_CTCTACGTCACAACGT	CID3586	2.68817	2232	1022	T-cells	T cells CD8+	T_cells_c4_CD8+_ZFP36	HER2+	no_gene_module	no_scTYPER_call	no_inferCNV_call	no_CNA_value
CID3586_CTCTACGTCAGTGCAT	CID3586	5.22552	1818	818	T-cells	T cells CD8+	T_cells_c4_CD8+_ZFP36	HER2+	no_gene_module	no_scTYPER_call	no_inferCNV_call	no_CNA_value
CID3586_CTCTGGTGTACCGTAT	CID3586	3.31681	2623	1106	T-cells	T cells CD8+	T_cells_c4_CD8+_ZFP36	HER2+	no_gene_module	no_scTYPER_call	no_inferCNV_call	no_CNA_value
CID3586_CTGCTGTTCAGGTAAA	CID3586	5.55556	1368	678	T-cells	T cells CD8+	T_cells_c4_CD8+_ZFP36	HER2+	no_gene_module	no_scTYPER_call	no_inferCNV_call	no_CNA_value
CID3586_CTGTTTAGTGTTTGGT	CID3586	2.66319	1915	960	T-cells	T cells CD8+	T_cells_c4_CD8+_ZFP36	HER2+	no_gene_module	no_scTYPER_call	no_inferCNV_call	no_CNA_value
CID3586_CTTAACTAGGATCGCA	CID3586	3.24723	2710	998	T-cells	T cells CD8+	T_cells_c4_CD8+_ZFP36	HER2+	no_gene_module	no_scTYPER_call	no_inferCNV_call	no_CNA_value
CID3586_CTTACCGGTCGCCATG	CID3586	5.23169	2007	845	T-cells	T cells CD8+	T_cells_c4_CD8+_ZFP36	HER2+	no_gene_module	no_scTYPER_call	no_inferCNV_call	no_CNA_value
CID3586_CTTTGCGAGGAGTTTA	CID3586	4.29352	2562	880	T-cells	T cells CD8+	T_cells_c4_CD8+_ZFP36	HER2+	no_gene_module	no_scTYPER_call	no_inferCNV_call	no_CNA_value
CID3586_CTTTGCGCATGCATGT	CID3586	2.91375	2574	1008	T-cells	T cells CD8+	T_cells_c4_CD8+_ZFP36	HER2+	no_gene_module	no_scTYPER_call	no_inferCNV_call	no_CNA_value
CID3586_CTTTGCGTCCGCAGTG	CID3586	2.18845	1645	802	T-cells	T cells CD8+	T_cells_c4_CD8+_ZFP36	HER2+	no_gene_module	no_scTYPER_call	no_inferCNV_call	no_CNA_value
CID3586_GACGGCTCACGCGAAA	CID3586	3.47194	2477	954	T-cells	T cells CD8+	T_cells_c4_CD8+_ZFP36	HER2+	no_gene_module	no_scTYPER_call	no_inferCNV_call	no_CNA_value
CID3586_GACGTGCCAGCTATTG	CID3586	6.99257	1616	753	T-cells	T cells CD8+	T_cells_c4_CD8+_ZFP36	HER2+	no_gene_module	no_scTYPER_call	no_inferCNV_call	no_CNA_value
CID3586_GATGCTACAGACTCGC	CID3586	5.99912	2267	960	T-cells	T cells CD8+	T_cells_c4_CD8+_ZFP36	HER2+	no_gene_module	no_scTYPER_call	no_inferCNV_call	no_CNA_value
CID3586_GCAAACTTCGTCTGAA	CID3586	4.06147	1822	760	T-cells	T cells CD8+	T_cells_c4_CD8+_ZFP36	HER2+	no_gene_module	no_scTYPER_call	no_inferCNV_call	no_CNA_value
CID3586_GCGCGATTCATTATCC	CID3586	4.02635	1366	685	T-cells	T cells CD8+	T_cells_c4_CD8+_ZFP36	HER2+	no_gene_module	no_scTYPER_call	no_inferCNV_call	no_CNA_value
CID3586_GCTCCTAGTCCGAATT	CID3586	6.08889	2250	949	T-cells	T cells CD8+	T_cells_c4_CD8+_ZFP36	HER2+	no_gene_module	no_scTYPER_call	no_inferCNV_call	no_CNA_value
CID3586_GCTTGAAGTGGCCCTA	CID3586	5.54827	2289	939	T-cells	T cells CD8+	T_cells_c4_CD8+_ZFP36	HER2+	no_gene_module	no_scTYPER_call	no_inferCNV_call	no_CNA_value
CID3586_GGAAAGCGTACTTGAC	CID3586	1.40056	1428	696	T-cells	T cells CD8+	T_cells_c4_CD8+_ZFP36	HER2+	no_gene_module	no_scTYPER_call	no_inferCNV_call	no_CNA_value
CID3586_GGACAGAAGAGCAATT	CID3586	3.81194	3148	1299	T-cells	T cells CD8+	T_cells_c4_CD8+_ZFP36	HER2+	no_gene_module	no_scTYPER_call	no_inferCNV_call	no_CNA_value
CID3586_GGACATTCAAGCGCTC	CID3586	2.35903	1738	713	T-cells	T cells CD8+	T_cells_c4_CD8+_ZFP36	HER2+	no_gene_module	no_scTYPER_call	no_inferCNV_call	no_CNA_value
CID3586_GGATTACCAGTCTTCC	CID3586	5.24968	1562	738	T-cells	T cells CD8+	T_cells_c4_CD8+_ZFP36	HER2+	no_gene_module	no_scTYPER_call	no_inferCNV_call	no_CNA_value
CID3586_GGCTCGACAGTGAGTG	CID3586	3.57918	1844	803	T-cells	T cells CD8+	T_cells_c4_CD8+_ZFP36	HER2+	no_gene_module	no_scTYPER_call	no_inferCNV_call	no_CNA_value
CID3586_GGGACCTGTGCGAAAC	CID3586	5.61358	1532	734	T-cells	T cells CD8+	T_cells_c4_CD8+_ZFP36	HER2+	no_gene_module	no_scTYPER_call	no_inferCNV_call	no_CNA_value
CID3586_GGGAGATTCATCGATG	CID3586	7.63359	1834	889	T-cells	T cells CD8+	T_cells_c4_CD8+_ZFP36	HER2+	no_gene_module	no_scTYPER_call	no_inferCNV_call	no_CNA_value
CID3586_GGGTTGCCACGAAAGC	CID3586	6.20504	1112	607	T-cells	T cells CD8+	T_cells_c4_CD8+_ZFP36	HER2+	no_gene_module	no_scTYPER_call	no_inferCNV_call	no_CNA_value
CID3586_GGTGAAGGTCGGCATC	CID3586	5.5791	1416	633	T-cells	T cells CD8+	T_cells_c4_CD8+_ZFP36	HER2+	no_gene_module	no_scTYPER_call	no_inferCNV_call	no_CNA_value
CID3586_GTAACGTAGACTAGAT	CID3586	3.68369	2036	841	T-cells	T cells CD8+	T_cells_c4_CD8+_ZFP36	HER2+	no_gene_module	no_scTYPER_call	no_inferCNV_call	no_CNA_value
CID3586_GTAACTGAGCTGCCCA	CID3586	6.14489	1546	665	T-cells	T cells CD8+	T_cells_c4_CD8+_ZFP36	HER2+	no_gene_module	no_scTYPER_call	no_inferCNV_call	no_CNA_value
CID3586_GTAGGCCGTTGCTCCT	CID3586	3.79965	1737	737	T-cells	T cells CD8+	T_cells_c4_CD8+_ZFP36	HER2+	no_gene_module	no_scTYPER_call	no_inferCNV_call	no_CNA_value
CID3586_GTATCTTCAAGCTGTT	CID3586	5.17949	1950	792	T-cells	T cells CD8+	T_cells_c4_CD8+_ZFP36	HER2+	no_gene_module	no_scTYPER_call	no_inferCNV_call	no_CNA_value
CID3586_GTATCTTCAGGTTTCA	CID3586	4.0962	2661	951	T-cells	T cells CD8+	T_cells_c4_CD8+_ZFP36	HER2+	no_gene_module	no_scTYPER_call	no_inferCNV_call	no_CNA_value
CID3586_GTCACAATCAACGGGA	CID3586	4.1411	1956	896	T-cells	T cells CD8+	T_cells_c4_CD8+_ZFP36	HER2+	no_gene_module	no_scTYPER_call	no_inferCNV_call	no_CNA_value
CID3586_GTGAAGGGTGAGTATA	CID3586	3.43766	1949	907	T-cells	T cells CD8+	T_cells_c4_CD8+_ZFP36	HER2+	no_gene_module	no_scTYPER_call	no_inferCNV_call	no_CNA_value
CID3586_GTGCTTCCACGGTAAG	CID3586	3.16526	2717	1041	T-cells	T cells CD8+	T_cells_c4_CD8+_ZFP36	HER2+	no_gene_module	no_scTYPER_call	no_inferCNV_call	no_CNA_value
CID3586_GTGCTTCTCTCTAAGG	CID3586	5.74324	888	560	T-cells	T cells CD8+	T_cells_c4_CD8+_ZFP36	HER2+	no_gene_module	no_scTYPER_call	no_inferCNV_call	no_CNA_value
CID3586_GTGTGCGGTCATTAGC	CID3586	8.63579	1598	747	T-cells	T cells CD8+	T_cells_c4_CD8+_ZFP36	HER2+	no_gene_module	no_scTYPER_call	no_inferCNV_call	no_CNA_value
CID3586_GTTCGGGGTAATCACC	CID3586	4.50928	1885	725	T-cells	T cells CD8+	T_cells_c4_CD8+_ZFP36	HER2+	no_gene_module	no_scTYPER_call	no_inferCNV_call	no_CNA_value
CID3586_GTTTCTACATCGATGT	CID3586	5.94389	2103	954	T-cells	T cells CD8+	T_cells_c4_CD8+_ZFP36	HER2+	no_gene_module	no_scTYPER_call	no_inferCNV_call	no_CNA_value
CID3586_GTTTCTACATTTGCCC	CID3586	4.02477	1615	768	T-cells	T cells CD8+	T_cells_c4_CD8+_ZFP36	HER2+	no_gene_module	no_scTYPER_call	no_inferCNV_call	no_CNA_value
CID3586_TACCTTAAGGCATGTG	CID3586	3.89495	3389	1357	T-cells	T cells CD8+	T_cells_c4_CD8+_ZFP36	HER2+	no_gene_module	no_scTYPER_call	no_inferCNV_call	no_CNA_value
CID3586_TACGGGCTCTGCTGTC	CID3586	5.08267	1633	734	T-cells	T cells CD8+	T_cells_c4_CD8+_ZFP36	HER2+	no_gene_module	no_scTYPER_call	no_inferCNV_call	no_CNA_value
CID3586_TAGACCAGTGCCTTGG	CID3586	4.96418	1954	945	T-cells	T cells CD8+	T_cells_c4_CD8+_ZFP36	HER2+	no_gene_module	no_scTYPER_call	no_inferCNV_call	no_CNA_value
CID3586_TAGAGCTAGATTACCC	CID3586	2.45464	1874	857	T-cells	T cells CD8+	T_cells_c4_CD8+_ZFP36	HER2+	no_gene_module	no_scTYPER_call	no_inferCNV_call	no_CNA_value
CID3586_TAGAGCTAGCATCATC	CID3586	3.42982	4111	1432	T-cells	T cells CD8+	T_cells_c4_CD8+_ZFP36	HER2+	no_gene_module	no_scTYPER_call	no_inferCNV_call	no_CNA_value
CID3586_TAGCCGGTCCTCGCAT	CID3586	3.3779	1421	747	T-cells	T cells CD8+	T_cells_c4_CD8+_ZFP36	HER2+	no_gene_module	no_scTYPER_call	no_inferCNV_call	no_CNA_value
CID3586_TAGTGGTTCGCCGTGA	CID3586	3.47299	1814	847	T-cells	T cells CD8+	T_cells_c4_CD8+_ZFP36	HER2+	no_gene_module	no_scTYPER_call	no_inferCNV_call	no_CNA_value
CID3586_TAGTTGGAGCCCAACC	CID3586	3.55842	3569	1260	T-cells	T cells CD8+	T_cells_c4_CD8+_ZFP36	HER2+	no_gene_module	no_scTYPER_call	no_inferCNV_call	no_CNA_value
CID3586_TATTACCCATGTTCCC	CID3586	3.18555	3045	1074	T-cells	T cells CD8+	T_cells_c4_CD8+_ZFP36	HER2+	no_gene_module	no_scTYPER_call	no_inferCNV_call	no_CNA_value
CID3586_TCACAAGGTACCGCTG	CID3586	4.83092	1656	770	T-cells	T cells CD8+	T_cells_c4_CD8+_ZFP36	HER2+	no_gene_module	no_scTYPER_call	no_inferCNV_call	no_CNA_value
CID3586_TCTTCGGGTGATGCCC	CID3586	4.6169	2036	925	T-cells	T cells CD8+	T_cells_c4_CD8+_ZFP36	HER2+	no_gene_module	no_scTYPER_call	no_inferCNV_call	no_CNA_value
CID3586_TGAAAGAAGTTCGCAT	CID3586	7.59205	3069	1250	T-cells	T cells CD8+	T_cells_c4_CD8+_ZFP36	HER2+	no_gene_module	no_scTYPER_call	no_inferCNV_call	no_CNA_value
CID3586_TGACGGCGTCCGAGTC	CID3586	2.03762	1914	758	T-cells	T cells CD8+	T_cells_c4_CD8+_ZFP36	HER2+	no_gene_module	no_scTYPER_call	no_inferCNV_call	no_CNA_value
CID3586_TGACTAGCATCTCCCA	CID3586	2.87677	2329	787	T-cells	T cells CD8+	T_cells_c4_CD8+_ZFP36	HER2+	no_gene_module	no_scTYPER_call	no_inferCNV_call	no_CNA_value
CID3586_TGAGGGATCGTTTAGG	CID3586	1.87282	2296	1046	T-cells	T cells CD8+	T_cells_c4_CD8+_ZFP36	HER2+	no_gene_module	no_scTYPER_call	no_inferCNV_call	no_CNA_value
CID3586_TGCGCAGTCTGCGTAA	CID3586	4.32191	2013	785	T-cells	T cells CD8+	T_cells_c4_CD8+_ZFP36	HER2+	no_gene_module	no_scTYPER_call	no_inferCNV_call	no_CNA_value
CID3586_TGGCTGGGTACAAGTA	CID3586	4.16008	1899	835	T-cells	T cells CD8+	T_cells_c4_CD8+_ZFP36	HER2+	no_gene_module	no_scTYPER_call	no_inferCNV_call	no_CNA_value
CID3586_TGTGTTTCAGCTGTGC	CID3586	4.89939	2286	891	T-cells	T cells CD8+	T_cells_c4_CD8+_ZFP36	HER2+	no_gene_module	no_scTYPER_call	no_inferCNV_call	no_CNA_value
CID3586_TTAGTTCAGATGCGAC	CID3586	4.85415	4491	1496	T-cells	T cells CD8+	T_cells_c4_CD8+_ZFP36	HER2+	no_gene_module	no_scTYPER_call	no_inferCNV_call	no_CNA_value
CID3586_TTAGTTCTCTGGCGTG	CID3586	5.55942	1439	579	T-cells	T cells CD8+	T_cells_c4_CD8+_ZFP36	HER2+	no_gene_module	no_scTYPER_call	no_inferCNV_call	no_CNA_value
CID3586_TTATGCTAGAACTGTA	CID3586	3.68809	1898	816	T-cells	T cells CD8+	T_cells_c4_CD8+_ZFP36	HER2+	no_gene_module	no_scTYPER_call	no_inferCNV_call	no_CNA_value
CID3586_TTCGGTCTCTGGAGCC	CID3586	4.28184	1845	831	T-cells	T cells CD8+	T_cells_c4_CD8+_ZFP36	HER2+	no_gene_module	no_scTYPER_call	no_inferCNV_call	no_CNA_value
CID3586_TTCTACAAGCTGCAAG	CID3586	4.80929	3015	987	T-cells	T cells CD8+	T_cells_c4_CD8+_ZFP36	HER2+	no_gene_module	no_scTYPER_call	no_inferCNV_call	no_CNA_value
CID3586_TTTCCTCCATATGCTG	CID3586	3.15068	2920	976	T-cells	T cells CD8+	T_cells_c4_CD8+_ZFP36	HER2+	no_gene_module	no_scTYPER_call	no_inferCNV_call	no_CNA_value
CID3586_ACAGCTAGTTACGACT	CID3586	2.87356	1740	826	T-cells	T cells CD8+	T_cells_c4_CD8+_ZFP36	HER2+	no_gene_module	no_scTYPER_call	no_inferCNV_call	no_CNA_value
CID3586_ACATGGTGTTGCCTCT	CID3586	3.56464	2104	889	T-cells	T cells CD8+	T_cells_c4_CD8+_ZFP36	HER2+	no_gene_module	no_scTYPER_call	no_inferCNV_call	no_CNA_value
CID3586_GCTGGGTAGTTTAGGA	CID3586	3.04628	3414	1254	T-cells	T cells CD8+	T_cells_c4_CD8+_ZFP36	HER2+	no_gene_module	no_scTYPER_call	no_inferCNV_call	no_CNA_value
CID3586_CTGAAGTAGGCACATG	CID3586	6.40732	3059	1234	T-cells	T cells CD8+	T_cells_c4_CD8+_ZFP36	HER2+	no_gene_module	no_scTYPER_call	no_inferCNV_call	no_CNA_value
CID3586_TACTTGTCAGACAAAT	CID3586	2.68133	5184	1835	T-cells	T cells CD8+	T_cells_c4_CD8+_ZFP36	HER2+	no_gene_module	no_scTYPER_call	no_inferCNV_call	no_CNA_value
CID3586_AAACGGGAGCGAGAAA	CID3586	4.05007	1358	707	T-cells	T cells CD8+	T_cells_c4_CD8+_ZFP36	HER2+	no_gene_module	no_scTYPER_call	no_inferCNV_call	no_CNA_value
CID3586_AAACGGGCAGGGAGAG	CID3586	6.21469	2124	819	T-cells	T cells CD8+	T_cells_c4_CD8+_ZFP36	HER2+	no_gene_module	no_scTYPER_call	no_inferCNV_call	no_CNA_value
CID3586_AAACGGGGTAGGGACT	CID3586	4.41595	1404	693	T-cells	T cells CD8+	T_cells_c4_CD8+_ZFP36	HER2+	no_gene_module	no_scTYPER_call	no_inferCNV_call	no_CNA_value
CID3586_AAAGCAACACGCTTTC	CID3586	4.97132	1569	733	T-cells	T cells CD8+	T_cells_c4_CD8+_ZFP36	HER2+	no_gene_module	no_scTYPER_call	no_inferCNV_call	no_CNA_value
CID3586_AAATGCCGTACAGTTC	CID3586	3.40212	1793	844	T-cells	T cells CD8+	T_cells_c4_CD8+_ZFP36	HER2+	no_gene_module	no_scTYPER_call	no_inferCNV_call	no_CNA_value
CID3586_AACCATGAGGTGATTA	CID3586	3.87152	3487	1075	T-cells	T cells CD8+	T_cells_c4_CD8+_ZFP36	HER2+	no_gene_module	no_scTYPER_call	no_inferCNV_call	no_CNA_value
CID3586_AACCATGCAAATTGCC	CID3586	4.40111	1795	774	T-cells	T cells CD8+	T_cells_c4_CD8+_ZFP36	HER2+	no_gene_module	no_scTYPER_call	no_inferCNV_call	no_CNA_value
CID3586_AACCATGTCATGGTCA	CID3586	5.20472	1441	788	T-cells	T cells CD8+	T_cells_c4_CD8+_ZFP36	HER2+	no_gene_module	no_scTYPER_call	no_inferCNV_call	no_CNA_value
CID3586_AACCATGTCTTTCCTC	CID3586	4.33031	1986	827	T-cells	T cells CD8+	T_cells_c4_CD8+_ZFP36	HER2+	no_gene_module	no_scTYPER_call	no_inferCNV_call	no_CNA_value
CID3586_AACCGCGGTTTCCACC	CID3586	3.7732	4956	1414	T-cells	T cells CD8+	T_cells_c4_CD8+_ZFP36	HER2+	no_gene_module	no_scTYPER_call	no_inferCNV_call	no_CNA_value
CID3586_AACTCCCAGCGTCAAG	CID3586	4.60333	2042	845	T-cells	T cells CD8+	T_cells_c4_CD8+_ZFP36	HER2+	no_gene_module	no_scTYPER_call	no_inferCNV_call	no_CNA_value
CID3586_AACTGGTAGAATTGTG	CID3586	3.26355	1624	695	T-cells	T cells CD8+	T_cells_c4_CD8+_ZFP36	HER2+	no_gene_module	no_scTYPER_call	no_inferCNV_call	no_CNA_value
CID3586_AACTGGTAGAGCCCAA	CID3586	4.11392	1580	734	T-cells	T cells CD8+	T_cells_c4_CD8+_ZFP36	HER2+	no_gene_module	no_scTYPER_call	no_inferCNV_call	no_CNA_value
CID3586_AACTGGTAGTTACCCA	CID3586	3.28371	2284	946	T-cells	T cells CD8+	T_cells_c4_CD8+_ZFP36	HER2+	no_gene_module	no_scTYPER_call	no_inferCNV_call	no_CNA_value
CID3586_AACTTTCTCATAACCG	CID3586	2.4359	2340	886	T-cells	T cells CD8+	T_cells_c4_CD8+_ZFP36	HER2+	no_gene_module	no_scTYPER_call	no_inferCNV_call	no_CNA_value
CID3586_AAGACCTAGAAAGTGG	CID3586	4.32069	2083	743	T-cells	T cells CD8+	T_cells_c4_CD8+_ZFP36	HER2+	no_gene_module	no_scTYPER_call	no_inferCNV_call	no_CNA_value
CID3586_AAGACCTAGGCTCAGA	CID3586	7.31057	1874	812	T-cells	T cells CD8+	T_cells_c4_CD8+_ZFP36	HER2+	no_gene_module	no_scTYPER_call	no_inferCNV_call	no_CNA_value
CID3586_AAGGAGCAGCTGGAAC	CID3586	5.03059	1471	677	T-cells	T cells CD8+	T_cells_c4_CD8+_ZFP36	HER2+	no_gene_module	no_scTYPER_call	no_inferCNV_call	no_CNA_value
CID3586_AAGGCAGAGTGGGTTG	CID3586	6.03394	1591	705	T-cells	T cells CD8+	T_cells_c4_CD8+_ZFP36	HER2+	no_gene_module	no_scTYPER_call	no_inferCNV_call	no_CNA_value
CID3586_AAGGTTCAGGAATGGA	CID3586	7.5232	2047	900	T-cells	T cells CD8+	T_cells_c4_CD8+_ZFP36	HER2+	no_gene_module	no_scTYPER_call	no_inferCNV_call	no_CNA_value
CID3586_AAGGTTCAGTTAGCGG	CID3586	2.50454	2755	981	T-cells	T cells CD8+	T_cells_c4_CD8+_ZFP36	HER2+	no_gene_module	no_scTYPER_call	no_inferCNV_call	no_CNA_value
CID3586_AAGTCTGAGGCGACAT	CID3586	2.95652	2300	1142	T-cells	T cells CD8+	T_cells_c4_CD8+_ZFP36	HER2+	no_gene_module	no_scTYPER_call	no_inferCNV_call	no_CNA_value
CID3586_AAGTCTGTCCTGTAGA	CID3586	4.73763	3335	1220	T-cells	T cells CD8+	T_cells_c4_CD8+_ZFP36	HER2+	no_gene_module	no_scTYPER_call	no_inferCNV_call	no_CNA_value
CID3586_AATCCAGAGTTACGGG	CID3586	2.97211	2187	994	T-cells	T cells CD8+	T_cells_c4_CD8+_ZFP36	HER2+	no_gene_module	no_scTYPER_call	no_inferCNV_call	no_CNA_value
CID3586_AATCCAGGTCGGCATC	CID3586	4.75285	1578	757	T-cells	T cells CD8+	T_cells_c4_CD8+_ZFP36	HER2+	no_gene_module	no_scTYPER_call	no_inferCNV_call	no_CNA_value
CID3586_AATCCAGTCCAGAGGA	CID3586	1.79935	1834	698	T-cells	T cells CD8+	T_cells_c4_CD8+_ZFP36	HER2+	no_gene_module	no_scTYPER_call	no_inferCNV_call	no_CNA_value
CID3586_AATCGGTGTGCAACGA	CID3586	6.23133	2343	1176	T-cells	T cells CD8+	T_cells_c4_CD8+_ZFP36	HER2+	no_gene_module	no_scTYPER_call	no_inferCNV_call	no_CNA_value
CID3586_ACACCAAAGGAGCGTT	CID3586	3.60624	2052	933	T-cells	T cells CD8+	T_cells_c4_CD8+_ZFP36	HER2+	no_gene_module	no_scTYPER_call	no_inferCNV_call	no_CNA_value
CID3586_ACACCGGCATTCTCAT	CID3586	6.36245	3835	1374	T-cells	T cells CD8+	T_cells_c4_CD8+_ZFP36	HER2+	no_gene_module	no_scTYPER_call	no_inferCNV_call	no_CNA_value
CID3586_ACAGCCGGTTACTGAC	CID3586	5.82686	1802	777	T-cells	T cells CD8+	T_cells_c4_CD8+_ZFP36	HER2+	no_gene_module	no_scTYPER_call	no_inferCNV_call	no_CNA_value
CID3586_ACAGCCGTCTGGGCCA	CID3586	6.31501	1346	660	T-cells	T cells CD8+	T_cells_c4_CD8+_ZFP36	HER2+	no_gene_module	no_scTYPER_call	no_inferCNV_call	no_CNA_value
CID3586_ACAGCTAAGGATATAC	CID3586	3.86134	2279	889	T-cells	T cells CD8+	T_cells_c4_CD8+_ZFP36	HER2+	no_gene_module	no_scTYPER_call	no_inferCNV_call	no_CNA_value
CID3586_ACAGCTAGTCAGATAA	CID3586	3.33333	1140	560	T-cells	T cells CD8+	T_cells_c4_CD8+_ZFP36	HER2+	no_gene_module	no_scTYPER_call	no_inferCNV_call	no_CNA_value
CID3586_ACAGCTAGTGACCAAG	CID3586	6.95652	1955	781	T-cells	T cells CD8+	T_cells_c4_CD8+_ZFP36	HER2+	no_gene_module	no_scTYPER_call	no_inferCNV_call	no_CNA_value
CID3586_ACCAGTAAGAGGTTAT	CID3586	7.39056	1759	827	T-cells	T cells CD8+	T_cells_c4_CD8+_ZFP36	HER2+	no_gene_module	no_scTYPER_call	no_inferCNV_call	no_CNA_value
CID3586_ACCTTTAGTCTAACGT	CID3586	2.18579	549	328	T-cells	T cells CD8+	T_cells_c4_CD8+_ZFP36	HER2+	no_gene_module	no_scTYPER_call	no_inferCNV_call	no_CNA_value
CID3586_ACGAGCCCATCCTTGC	CID3586	4.50875	1486	681	T-cells	T cells CD8+	T_cells_c4_CD8+_ZFP36	HER2+	no_gene_module	no_scTYPER_call	no_inferCNV_call	no_CNA_value
CID3586_ACGAGGATCCGCAGTG	CID3586	5.38843	3025	981	T-cells	T cells CD8+	T_cells_c4_CD8+_ZFP36	HER2+	no_gene_module	no_scTYPER_call	no_inferCNV_call	no_CNA_value
CID3586_ACGATACTCTCAACTT	CID3586	4.56403	1468	637	T-cells	T cells CD8+	T_cells_c4_CD8+_ZFP36	HER2+	no_gene_module	no_scTYPER_call	no_inferCNV_call	no_CNA_value
CID3586_ACGCCGATCAATAAGG	CID3586	4.88372	2580	1002	T-cells	T cells CD8+	T_cells_c4_CD8+_ZFP36	HER2+	no_gene_module	no_scTYPER_call	no_inferCNV_call	no_CNA_value
CID3586_ACGCCGATCTTTAGGG	CID3586	1.81577	2258	920	T-cells	T cells CD8+	T_cells_c4_CD8+_ZFP36	HER2+	no_gene_module	no_scTYPER_call	no_inferCNV_call	no_CNA_value
CID3586_ACGGAGACAATACGCT	CID3586	3.07615	1983	776	T-cells	T cells CD8+	T_cells_c4_CD8+_ZFP36	HER2+	no_gene_module	no_scTYPER_call	no_inferCNV_call	no_CNA_value
CID3586_ACGGAGACAGCCAATT	CID3586	3.95697	2603	940	T-cells	T cells CD8+	T_cells_c4_CD8+_ZFP36	HER2+	no_gene_module	no_scTYPER_call	no_inferCNV_call	no_CNA_value
CID3586_ACGGCCAGTGGTAACG	CID3586	3.85793	1633	792	T-cells	T cells CD8+	T_cells_c4_CD8+_ZFP36	HER2+	no_gene_module	no_scTYPER_call	no_inferCNV_call	no_CNA_value
CID3586_ACGTCAAAGAGTGAGA	CID3586	6.00739	2164	782	T-cells	T cells CD8+	T_cells_c4_CD8+_ZFP36	HER2+	no_gene_module	no_scTYPER_call	no_inferCNV_call	no_CNA_value
CID3586_ACTATCTAGGGAACGG	CID3586	1.97542	2278	916	T-cells	T cells CD8+	T_cells_c4_CD8+_ZFP36	HER2+	no_gene_module	no_scTYPER_call	no_inferCNV_call	no_CNA_value
CID3586_ACTATCTCAGTTCCCT	CID3586	3.37461	3230	1278	T-cells	T cells CD8+	T_cells_c4_CD8+_ZFP36	HER2+	no_gene_module	no_scTYPER_call	no_inferCNV_call	no_CNA_value
CID3586_ACTGAACTCATTGCGA	CID3586	1.55039	1419	679	T-cells	T cells CD8+	T_cells_c4_CD8+_ZFP36	HER2+	no_gene_module	no_scTYPER_call	no_inferCNV_call	no_CNA_value
CID3586_ACTGAGTCAAGCGCTC	CID3586	2.6524	2149	859	T-cells	T cells CD8+	T_cells_c4_CD8+_ZFP36	HER2+	no_gene_module	no_scTYPER_call	no_inferCNV_call	no_CNA_value
CID3586_ACTGAGTCAGTATCTG	CID3586	4.15053	1807	820	T-cells	T cells CD8+	T_cells_c4_CD8+_ZFP36	HER2+	no_gene_module	no_scTYPER_call	no_inferCNV_call	no_CNA_value
CID3586_ACTGAGTGTAAGAGGA	CID3586	3.9115	2531	1012	T-cells	T cells CD8+	T_cells_c4_CD8+_ZFP36	HER2+	no_gene_module	no_scTYPER_call	no_inferCNV_call	no_CNA_value
CID3586_ACTGAGTGTCCTCTTG	CID3586	6.5097	2166	937	T-cells	T cells CD8+	T_cells_c4_CD8+_ZFP36	HER2+	no_gene_module	no_scTYPER_call	no_inferCNV_call	no_CNA_value
CID3586_ACTGTCCAGCGTGAGT	CID3586	3.50219	4797	1612	T-cells	T cells CD8+	T_cells_c4_CD8+_ZFP36	HER2+	no_gene_module	no_scTYPER_call	no_inferCNV_call	no_CNA_value
CID3586_ACTGTCCTCACAATGC	CID3586	6.68161	2230	931	T-cells	T cells CD8+	T_cells_c4_CD8+_ZFP36	HER2+	no_gene_module	no_scTYPER_call	no_inferCNV_call	no_CNA_value
CID3586_ACTTACTTCCGTTGCT	CID3586	2.63459	1746	930	T-cells	T cells CD8+	T_cells_c4_CD8+_ZFP36	HER2+	no_gene_module	no_scTYPER_call	no_inferCNV_call	no_CNA_value
CID3586_ACTTGTTGTATGAATG	CID3586	5.52895	2297	1001	T-cells	T cells CD8+	T_cells_c4_CD8+_ZFP36	HER2+	no_gene_module	no_scTYPER_call	no_inferCNV_call	no_CNA_value
CID3586_ACTTGTTTCAAGGTAA	CID3586	5.61024	2032	944	T-cells	T cells CD8+	T_cells_c4_CD8+_ZFP36	HER2+	no_gene_module	no_scTYPER_call	no_inferCNV_call	no_CNA_value
CID3586_ACTTTCAAGTCGAGTG	CID3586	3.15146	2126	896	T-cells	T cells CD8+	T_cells_c4_CD8+_ZFP36	HER2+	no_gene_module	no_scTYPER_call	no_inferCNV_call	no_CNA_value
CID3586_ACTTTCAGTATCGCAT	CID3586	4.40252	1908	811	T-cells	T cells CD8+	T_cells_c4_CD8+_ZFP36	HER2+	no_gene_module	no_scTYPER_call	no_inferCNV_call	no_CNA_value
CID3586_AGAATAGAGCAGCGTA	CID3586	4.9236	1767	954	T-cells	T cells CD8+	T_cells_c4_CD8+_ZFP36	HER2+	no_gene_module	no_scTYPER_call	no_inferCNV_call	no_CNA_value
CID3586_AGAATAGCACCAGGTC	CID3586	8.89064	1271	562	T-cells	T cells CD8+	T_cells_c4_CD8+_ZFP36	HER2+	no_gene_module	no_scTYPER_call	no_inferCNV_call	no_CNA_value
CID3586_AGACGTTTCACCTCGT	CID3586	4.16922	1631	733	T-cells	T cells CD8+	T_cells_c4_CD8+_ZFP36	HER2+	no_gene_module	no_scTYPER_call	no_inferCNV_call	no_CNA_value
CID3586_AGAGCTTAGACTCGGA	CID3586	2.67717	1905	755	T-cells	T cells CD8+	T_cells_c4_CD8+_ZFP36	HER2+	no_gene_module	no_scTYPER_call	no_inferCNV_call	no_CNA_value
CID3586_AGAGTGGTCCACGTTC	CID3586	3.88693	2547	1070	T-cells	T cells CD8+	T_cells_c4_CD8+_ZFP36	HER2+	no_gene_module	no_scTYPER_call	no_inferCNV_call	no_CNA_value
CID3586_AGATCTGAGACGACGT	CID3586	2.88517	3466	1182	T-cells	T cells CD8+	T_cells_c4_CD8+_ZFP36	HER2+	no_gene_module	no_scTYPER_call	no_inferCNV_call	no_CNA_value
CID3586_AGATCTGCACAAGTAA	CID3586	4.49954	2178	959	T-cells	T cells CD8+	T_cells_c4_CD8+_ZFP36	HER2+	no_gene_module	no_scTYPER_call	no_inferCNV_call	no_CNA_value
CID3586_AGATCTGGTTTGACTG	CID3586	6.54923	2214	922	T-cells	T cells CD8+	T_cells_c4_CD8+_ZFP36	HER2+	no_gene_module	no_scTYPER_call	no_inferCNV_call	no_CNA_value
CID3586_AGATTGCAGTGTCCAT	CID3586	5.08647	1966	797	T-cells	T cells CD8+	T_cells_c4_CD8+_ZFP36	HER2+	no_gene_module	no_scTYPER_call	no_inferCNV_call	no_CNA_value
CID3586_AGATTGCTCCACGACG	CID3586	5.66582	2771	1172	T-cells	T cells CD8+	T_cells_c4_CD8+_ZFP36	HER2+	no_gene_module	no_scTYPER_call	no_inferCNV_call	no_CNA_value
CID3586_AGCATACGTAACGCGA	CID3586	1.89908	1843	808	T-cells	T cells CD8+	T_cells_c4_CD8+_ZFP36	HER2+	no_gene_module	no_scTYPER_call	no_inferCNV_call	no_CNA_value
CID3586_AGCATACTCCTCTAGC	CID3586	4.15467	2431	959	T-cells	T cells CD8+	T_cells_c4_CD8+_ZFP36	HER2+	no_gene_module	no_scTYPER_call	no_inferCNV_call	no_CNA_value
CID3586_AGCCTAAAGCTGTCTA	CID3586	7.42666	2693	1047	T-cells	T cells CD8+	T_cells_c4_CD8+_ZFP36	HER2+	no_gene_module	no_scTYPER_call	no_inferCNV_call	no_CNA_value
CID3586_AGCCTAATCTAACGGT	CID3586	3.38846	2479	922	T-cells	T cells CD8+	T_cells_c4_CD8+_ZFP36	HER2+	no_gene_module	no_scTYPER_call	no_inferCNV_call	no_CNA_value
CID3586_AGCTCCTAGTCCTCCT	CID3586	3.31695	1628	816	T-cells	T cells CD8+	T_cells_c4_CD8+_ZFP36	HER2+	no_gene_module	no_scTYPER_call	no_inferCNV_call	no_CNA_value
CID3586_AGCTCTCGTAAACGCG	CID3586	10.4571	3347	1190	T-cells	T cells CD8+	T_cells_c4_CD8+_ZFP36	HER2+	no_gene_module	no_scTYPER_call	no_inferCNV_call	no_CNA_value
CID3586_AGCTTGAAGTCCAGGA	CID3586	4.94118	2125	866	T-cells	T cells CD8+	T_cells_c4_CD8+_ZFP36	HER2+	no_gene_module	no_scTYPER_call	no_inferCNV_call	no_CNA_value
CID3586_AGCTTGACAAGTCTGT	CID3586	7.46269	1206	593	T-cells	T cells CD8+	T_cells_c4_CD8+_ZFP36	HER2+	no_gene_module	no_scTYPER_call	no_inferCNV_call	no_CNA_value
CID3586_AGGCCACCACCGAATT	CID3586	5.82298	1288	577	T-cells	T cells CD8+	T_cells_c4_CD8+_ZFP36	HER2+	no_gene_module	no_scTYPER_call	no_inferCNV_call	no_CNA_value
CID3586_AGGCCACGTCCGTTAA	CID3586	4.24837	2142	871	T-cells	T cells CD8+	T_cells_c4_CD8+_ZFP36	HER2+	no_gene_module	no_scTYPER_call	no_inferCNV_call	no_CNA_value
CID3586_AGGCCACGTCTAGGTT	CID3586	4.59137	2178	856	T-cells	T cells CD8+	T_cells_c4_CD8+_ZFP36	HER2+	no_gene_module	no_scTYPER_call	no_inferCNV_call	no_CNA_value
CID3586_AGGCCGTCAAATTGCC	CID3586	5.48166	2481	943	T-cells	T cells CD8+	T_cells_c4_CD8+_ZFP36	HER2+	no_gene_module	no_scTYPER_call	no_inferCNV_call	no_CNA_value
CID3586_AGGCCGTCACCAACCG	CID3586	5.23227	2045	856	T-cells	T cells CD8+	T_cells_c4_CD8+_ZFP36	HER2+	no_gene_module	no_scTYPER_call	no_inferCNV_call	no_CNA_value
CID3586_AGGGATGAGGGCTTGA	CID3586	2.79805	1644	740	T-cells	T cells CD8+	T_cells_c4_CD8+_ZFP36	HER2+	no_gene_module	no_scTYPER_call	no_inferCNV_call	no_CNA_value
CID3586_AGGGTGAGTAAGGGAA	CID3586	4.15565	2647	1179	T-cells	T cells CD8+	T_cells_c4_CD8+_ZFP36	HER2+	no_gene_module	no_scTYPER_call	no_inferCNV_call	no_CNA_value
CID3586_AGGTCCGGTCAACATC	CID3586	2.81426	1599	630	T-cells	T cells CD8+	T_cells_c4_CD8+_ZFP36	HER2+	no_gene_module	no_scTYPER_call	no_inferCNV_call	no_CNA_value
CID3586_AGTGTCACAGTCAGCC	CID3586	5.02092	1912	779	T-cells	T cells CD8+	T_cells_c4_CD8+_ZFP36	HER2+	no_gene_module	no_scTYPER_call	no_inferCNV_call	no_CNA_value
CID3586_AGTTGGTAGGTGCTAG	CID3586	3.84431	2081	817	T-cells	T cells CD8+	T_cells_c4_CD8+_ZFP36	HER2+	no_gene_module	no_scTYPER_call	no_inferCNV_call	no_CNA_value
CID3586_ATAACGCGTTTGTTTC	CID3586	4.22535	1491	728	T-cells	T cells CD8+	T_cells_c4_CD8+_ZFP36	HER2+	no_gene_module	no_scTYPER_call	no_inferCNV_call	no_CNA_value
CID3586_ATAGACCCACAGCCCA	CID3586	4.22257	2534	917	T-cells	T cells CD8+	T_cells_c4_CD8+_ZFP36	HER2+	no_gene_module	no_scTYPER_call	no_inferCNV_call	no_CNA_value
CID3586_ATCACGATCAAACCAC	CID3586	2.61316	2143	836	T-cells	T cells CD8+	T_cells_c4_CD8+_ZFP36	HER2+	no_gene_module	no_scTYPER_call	no_inferCNV_call	no_CNA_value
CID3586_ATCATCTAGGTGATTA	CID3586	6.89471	1871	832	T-cells	T cells CD8+	T_cells_c4_CD8+_ZFP36	HER2+	no_gene_module	no_scTYPER_call	no_inferCNV_call	no_CNA_value
CID3586_ATCATGGAGCATCATC	CID3586	5.59006	2415	905	T-cells	T cells CD8+	T_cells_c4_CD8+_ZFP36	HER2+	no_gene_module	no_scTYPER_call	no_inferCNV_call	no_CNA_value
CID3586_ATCATGGTCACGATGT	CID3586	2.94659	1629	741	T-cells	T cells CD8+	T_cells_c4_CD8+_ZFP36	HER2+	no_gene_module	no_scTYPER_call	no_inferCNV_call	no_CNA_value
CID3586_ATCCACCAGTGAATTG	CID3586	3.33181	2191	931	T-cells	T cells CD8+	T_cells_c4_CD8+_ZFP36	HER2+	no_gene_module	no_scTYPER_call	no_inferCNV_call	no_CNA_value
CID3586_ATCCGAATCGGTTAAC	CID3586	2.31092	2380	856	T-cells	T cells CD8+	T_cells_c4_CD8+_ZFP36	HER2+	no_gene_module	no_scTYPER_call	no_inferCNV_call	no_CNA_value
CID3586_ATCGAGTCAGGATTGG	CID3586	1.26468	2214	864	T-cells	T cells CD8+	T_cells_c4_CD8+_ZFP36	HER2+	no_gene_module	no_scTYPER_call	no_inferCNV_call	no_CNA_value
CID3586_ATCTACTCAACAACCT	CID3586	4.05132	1481	659	T-cells	T cells CD8+	T_cells_c4_CD8+_ZFP36	HER2+	no_gene_module	no_scTYPER_call	no_inferCNV_call	no_CNA_value
CID3586_ATCTACTCAGGCGATA	CID3586	2.63913	1743	713	T-cells	T cells CD8+	T_cells_c4_CD8+_ZFP36	HER2+	no_gene_module	no_scTYPER_call	no_inferCNV_call	no_CNA_value
CID3586_ATCTACTGTTCGGCAC	CID3586	6.87623	2036	806	T-cells	T cells CD8+	T_cells_c4_CD8+_ZFP36	HER2+	no_gene_module	no_scTYPER_call	no_inferCNV_call	no_CNA_value
CID3586_ATCTGCCGTGTTGAGG	CID3586	6.83995	2193	898	T-cells	T cells CD8+	T_cells_c4_CD8+_ZFP36	HER2+	no_gene_module	no_scTYPER_call	no_inferCNV_call	no_CNA_value
CID3586_ATGAGGGAGCGATTCT	CID3586	3.54994	1662	746	T-cells	T cells CD8+	T_cells_c4_CD8+_ZFP36	HER2+	no_gene_module	no_scTYPER_call	no_inferCNV_call	no_CNA_value
CID3586_ATGAGGGAGGGAAACA	CID3586	4.66274	2209	838	T-cells	T cells CD8+	T_cells_c4_CD8+_ZFP36	HER2+	no_gene_module	no_scTYPER_call	no_inferCNV_call	no_CNA_value
CID3586_ATGAGGGCATGCCTTC	CID3586	4.5739	2077	930	T-cells	T cells CD8+	T_cells_c4_CD8+_ZFP36	HER2+	no_gene_module	no_scTYPER_call	no_inferCNV_call	no_CNA_value
CID3586_ATGCGATAGATGCGAC	CID3586	5.11823	3341	1185	T-cells	T cells CD8+	T_cells_c4_CD8+_ZFP36	HER2+	no_gene_module	no_scTYPER_call	no_inferCNV_call	no_CNA_value
CID3586_ATGGGAGGTGACGCCT	CID3586	3.62992	2259	917	T-cells	T cells CD8+	T_cells_c4_CD8+_ZFP36	HER2+	no_gene_module	no_scTYPER_call	no_inferCNV_call	no_CNA_value
CID3586_ATGTGTGTCACGGTTA	CID3586	3.66104	2431	859	T-cells	T cells CD8+	T_cells_c4_CD8+_ZFP36	HER2+	no_gene_module	no_scTYPER_call	no_inferCNV_call	no_CNA_value
CID3586_ATGTGTGTCGGAAACG	CID3586	2.70742	1145	521	T-cells	T cells CD8+	T_cells_c4_CD8+_ZFP36	HER2+	no_gene_module	no_scTYPER_call	no_inferCNV_call	no_CNA_value
CID3586_ATTATCCGTGTGGCTC	CID3586	3.76506	3984	1346	T-cells	T cells CD8+	T_cells_c4_CD8+_ZFP36	HER2+	no_gene_module	no_scTYPER_call	no_inferCNV_call	no_CNA_value
CID3586_ATTCTACGTCTTTCAT	CID3586	4.43308	1173	572	T-cells	T cells CD8+	T_cells_c4_CD8+_ZFP36	HER2+	no_gene_module	no_scTYPER_call	no_inferCNV_call	no_CNA_value
CID3586_ATTCTACGTTCTCATT	CID3586	3.28125	4480	1663	T-cells	T cells CD8+	T_cells_c4_CD8+_ZFP36	HER2+	no_gene_module	no_scTYPER_call	no_inferCNV_call	no_CNA_value
CID3586_ATTGGACGTAAAGTCA	CID3586	2.78599	2369	1012	T-cells	T cells CD8+	T_cells_c4_CD8+_ZFP36	HER2+	no_gene_module	no_scTYPER_call	no_inferCNV_call	no_CNA_value
CID3586_ATTGGTGAGTCGAGTG	CID3586	1.86418	3004	1156	T-cells	T cells CD8+	T_cells_c4_CD8+_ZFP36	HER2+	no_gene_module	no_scTYPER_call	no_inferCNV_call	no_CNA_value
CID3586_ATTGGTGTCCTCAATT	CID3586	2.77178	2778	1003	T-cells	T cells CD8+	T_cells_c4_CD8+_ZFP36	HER2+	no_gene_module	no_scTYPER_call	no_inferCNV_call	no_CNA_value
CID3586_ATTGGTGTCTGGTTCC	CID3586	5.71652	2554	870	T-cells	T cells CD8+	T_cells_c4_CD8+_ZFP36	HER2+	no_gene_module	no_scTYPER_call	no_inferCNV_call	no_CNA_value
CID3586_ATTTCTGGTAGCCTAT	CID3586	4.07536	4883	1474	T-cells	T cells CD8+	T_cells_c4_CD8+_ZFP36	HER2+	no_gene_module	no_scTYPER_call	no_inferCNV_call	no_CNA_value
CID3586_CAACCAACAAGACGTG	CID3586	7.3764	2508	1055	T-cells	T cells CD8+	T_cells_c4_CD8+_ZFP36	HER2+	no_gene_module	no_scTYPER_call	no_inferCNV_call	no_CNA_value
CID3586_CAACCAAGTGTTGGGA	CID3586	5.515	2466	866	T-cells	T cells CD8+	T_cells_c4_CD8+_ZFP36	HER2+	no_gene_module	no_scTYPER_call	no_inferCNV_call	no_CNA_value
CID3586_CAACTAGAGTCACGCC	CID3586	6.80448	2322	936	T-cells	T cells CD8+	T_cells_c4_CD8+_ZFP36	HER2+	no_gene_module	no_scTYPER_call	no_inferCNV_call	no_CNA_value
CID3586_CAAGAAATCTGTTGAG	CID3586	3.62745	2040	731	T-cells	T cells CD8+	T_cells_c4_CD8+_ZFP36	HER2+	no_gene_module	no_scTYPER_call	no_inferCNV_call	no_CNA_value
CID3586_CAAGATCGTCTTGCGG	CID3586	2.32739	1289	688	T-cells	T cells CD8+	T_cells_c4_CD8+_ZFP36	HER2+	no_gene_module	no_scTYPER_call	no_inferCNV_call	no_CNA_value
CID3586_CAAGATCTCTGTCTAT	CID3586	4.32767	1941	859	T-cells	T cells CD8+	T_cells_c4_CD8+_ZFP36	HER2+	no_gene_module	no_scTYPER_call	no_inferCNV_call	no_CNA_value
CID3586_CAAGGCCCACCAGCAC	CID3586	4.90798	2771	1029	T-cells	T cells CD8+	T_cells_c4_CD8+_ZFP36	HER2+	no_gene_module	no_scTYPER_call	no_inferCNV_call	no_CNA_value
CID3586_CACACCTCACTGAAGG	CID3586	7.47095	1807	776	T-cells	T cells CD8+	T_cells_c4_CD8+_ZFP36	HER2+	no_gene_module	no_scTYPER_call	no_inferCNV_call	no_CNA_value
CID3586_CACATAGCACGACGAA	CID3586	4.78972	1712	710	T-cells	T cells CD8+	T_cells_c4_CD8+_ZFP36	HER2+	no_gene_module	no_scTYPER_call	no_inferCNV_call	no_CNA_value
CID3586_CACATAGGTAAGTGTA	CID3586	6.02362	2540	920	T-cells	T cells CD8+	T_cells_c4_CD8+_ZFP36	HER2+	no_gene_module	no_scTYPER_call	no_inferCNV_call	no_CNA_value
CID3586_CACATTTCACACTGCG	CID3586	3.78279	1639	656	T-cells	T cells CD8+	T_cells_c4_CD8+_ZFP36	HER2+	no_gene_module	no_scTYPER_call	no_inferCNV_call	no_CNA_value
CID3586_CACCACTAGAAGATTC	CID3586	4.22535	2485	986	T-cells	T cells CD8+	T_cells_c4_CD8+_ZFP36	HER2+	no_gene_module	no_scTYPER_call	no_inferCNV_call	no_CNA_value
CID3586_CACCAGGAGATCGATA	CID3586	1.61905	2100	859	T-cells	T cells CD8+	T_cells_c4_CD8+_ZFP36	HER2+	no_gene_module	no_scTYPER_call	no_inferCNV_call	no_CNA_value
CID3586_CACCAGGGTCGACTAT	CID3586	6.53083	1914	889	T-cells	T cells CD8+	T_cells_c4_CD8+_ZFP36	HER2+	no_gene_module	no_scTYPER_call	no_inferCNV_call	no_CNA_value
CID3586_CACCTTGAGGTAAACT	CID3586	5.13812	1810	858	T-cells	T cells CD8+	T_cells_c4_CD8+_ZFP36	HER2+	no_gene_module	no_scTYPER_call	no_inferCNV_call	no_CNA_value
CID3586_CACCTTGTCCGGCACA	CID3586	4.17163	2517	954	T-cells	T cells CD8+	T_cells_c4_CD8+_ZFP36	HER2+	no_gene_module	no_scTYPER_call	no_inferCNV_call	no_CNA_value
CID3586_CACTCCAAGAACAATC	CID3586	3.62369	2870	990	T-cells	T cells CD8+	T_cells_c4_CD8+_ZFP36	HER2+	no_gene_module	no_scTYPER_call	no_inferCNV_call	no_CNA_value
CID3586_CACTCCAAGACTACAA	CID3586	4.23027	2293	1009	T-cells	T cells CD8+	T_cells_c4_CD8+_ZFP36	HER2+	no_gene_module	no_scTYPER_call	no_inferCNV_call	no_CNA_value
CID3586_CACTCCAGTCAATGTC	CID3586	2.90742	2614	1059	T-cells	T cells CD8+	T_cells_c4_CD8+_ZFP36	HER2+	no_gene_module	no_scTYPER_call	no_inferCNV_call	no_CNA_value
CID3586_CACTCCAGTCAGAGGT	CID3586	5.64626	1470	782	T-cells	T cells CD8+	T_cells_c4_CD8+_ZFP36	HER2+	no_gene_module	no_scTYPER_call	no_inferCNV_call	no_CNA_value
CID3586_CAGATCACACACAGAG	CID3586	8.68925	2037	929	T-cells	T cells CD8+	T_cells_c4_CD8+_ZFP36	HER2+	no_gene_module	no_scTYPER_call	no_inferCNV_call	no_CNA_value
CID3586_CAGATCATCGCCGTGA	CID3586	4.47598	1832	786	T-cells	T cells CD8+	T_cells_c4_CD8+_ZFP36	HER2+	no_gene_module	no_scTYPER_call	no_inferCNV_call	no_CNA_value
CID3586_CAGCATACAGCGTTCG	CID3586	3.26327	1808	937	T-cells	T cells CD8+	T_cells_c4_CD8+_ZFP36	HER2+	no_gene_module	no_scTYPER_call	no_inferCNV_call	no_CNA_value
CID3586_CAGCATAGTCCCTACT	CID3586	3.88857	1723	736	T-cells	T cells CD8+	T_cells_c4_CD8+_ZFP36	HER2+	no_gene_module	no_scTYPER_call	no_inferCNV_call	no_CNA_value
CID3586_CAGCTAATCATGCATG	CID3586	5.95298	1999	906	T-cells	T cells CD8+	T_cells_c4_CD8+_ZFP36	HER2+	no_gene_module	no_scTYPER_call	no_inferCNV_call	no_CNA_value
CID3586_CAGCTAATCCATTCTA	CID3586	2.99003	1806	853	T-cells	T cells CD8+	T_cells_c4_CD8+_ZFP36	HER2+	no_gene_module	no_scTYPER_call	no_inferCNV_call	no_CNA_value
CID3586_CAGCTGGAGCGTTGCC	CID3586	4.90446	1570	766	T-cells	T cells CD8+	T_cells_c4_CD8+_ZFP36	HER2+	no_gene_module	no_scTYPER_call	no_inferCNV_call	no_CNA_value
CID3586_CAGCTGGTCTGTCAAG	CID3586	2.5019	1319	672	T-cells	T cells CD8+	T_cells_c4_CD8+_ZFP36	HER2+	no_gene_module	no_scTYPER_call	no_inferCNV_call	no_CNA_value
CID3586_CATATTCTCAGAGACG	CID3586	6.97026	2152	807	T-cells	T cells CD8+	T_cells_c4_CD8+_ZFP36	HER2+	no_gene_module	no_scTYPER_call	no_inferCNV_call	no_CNA_value
CID3586_CATCAGAGTTCCATGA	CID3586	4.79662	2606	1009	T-cells	T cells CD8+	T_cells_c4_CD8+_ZFP36	HER2+	no_gene_module	no_scTYPER_call	no_inferCNV_call	no_CNA_value
CID3586_CATCCACGTGCAGGTA	CID3586	3.67745	2257	838	T-cells	T cells CD8+	T_cells_c4_CD8+_ZFP36	HER2+	no_gene_module	no_scTYPER_call	no_inferCNV_call	no_CNA_value
CID3586_CATCCACTCGTTGCCT	CID3586	3.27533	1954	901	T-cells	T cells CD8+	T_cells_c4_CD8+_ZFP36	HER2+	no_gene_module	no_scTYPER_call	no_inferCNV_call	no_CNA_value
CID3586_CATCGAAAGCCATCGC	CID3586	4.48113	2120	775	T-cells	T cells CD8+	T_cells_c4_CD8+_ZFP36	HER2+	no_gene_module	no_scTYPER_call	no_inferCNV_call	no_CNA_value
CID3586_CATCGAATCTCCAGGG	CID3586	2.50181	2758	968	T-cells	T cells CD8+	T_cells_c4_CD8+_ZFP36	HER2+	no_gene_module	no_scTYPER_call	no_inferCNV_call	no_CNA_value
CID3586_CATGACAGTGCTAGCC	CID3586	2.95312	2709	1015	T-cells	T cells CD8+	T_cells_c4_CD8+_ZFP36	HER2+	no_gene_module	no_scTYPER_call	no_inferCNV_call	no_CNA_value
CID3586_CATGCCTAGAGGTTGC	CID3586	4.14087	2584	946	T-cells	T cells CD8+	T_cells_c4_CD8+_ZFP36	HER2+	no_gene_module	no_scTYPER_call	no_inferCNV_call	no_CNA_value
CID3586_CATGCCTGTTCGTGAT	CID3586	2.56684	2805	1116	T-cells	T cells CD8+	T_cells_c4_CD8+_ZFP36	HER2+	no_gene_module	no_scTYPER_call	no_inferCNV_call	no_CNA_value
CID3586_CATGGCGCAAGAAAGG	CID3586	2.54503	2554	1032	T-cells	T cells CD8+	T_cells_c4_CD8+_ZFP36	HER2+	no_gene_module	no_scTYPER_call	no_inferCNV_call	no_CNA_value
CID3586_CATGGCGCATTATCTC	CID3586	5.73593	1848	731	T-cells	T cells CD8+	T_cells_c4_CD8+_ZFP36	HER2+	no_gene_module	no_scTYPER_call	no_inferCNV_call	no_CNA_value
CID3586_CATTATCAGAATTCCC	CID3586	8.93617	1645	673	T-cells	T cells CD8+	T_cells_c4_CD8+_ZFP36	HER2+	no_gene_module	no_scTYPER_call	no_inferCNV_call	no_CNA_value
CID3586_CATTCGCAGCGACGTA	CID3586	3.41048	4105	1329	T-cells	T cells CD8+	T_cells_c4_CD8+_ZFP36	HER2+	no_gene_module	no_scTYPER_call	no_inferCNV_call	no_CNA_value
CID3586_CCAATCCAGTACGATA	CID3586	4.25811	3053	1167	T-cells	T cells CD8+	T_cells_c4_CD8+_ZFP36	HER2+	no_gene_module	no_scTYPER_call	no_inferCNV_call	no_CNA_value
CID3586_CCAATCCGTAGCACGA	CID3586	7.10923	2124	920	T-cells	T cells CD8+	T_cells_c4_CD8+_ZFP36	HER2+	no_gene_module	no_scTYPER_call	no_inferCNV_call	no_CNA_value
CID3586_CCACCTAAGCTAGGCA	CID3586	3.5461	2115	840	T-cells	T cells CD8+	T_cells_c4_CD8+_ZFP36	HER2+	no_gene_module	no_scTYPER_call	no_inferCNV_call	no_CNA_value
CID3586_CCACCTACAAGGTTTC	CID3586	3.32421	2557	916	T-cells	T cells CD8+	T_cells_c4_CD8+_ZFP36	HER2+	no_gene_module	no_scTYPER_call	no_inferCNV_call	no_CNA_value
CID3586_CCACGGAAGCCTATGT	CID3586	5.6422	2180	952	T-cells	T cells CD8+	T_cells_c4_CD8+_ZFP36	HER2+	no_gene_module	no_scTYPER_call	no_inferCNV_call	no_CNA_value
CID3586_CCACGGACATGGGAAC	CID3586	6.06889	1829	798	T-cells	T cells CD8+	T_cells_c4_CD8+_ZFP36	HER2+	no_gene_module	no_scTYPER_call	no_inferCNV_call	no_CNA_value
CID3586_CCACTACAGGCAGGTT	CID3586	3.21556	2519	1038	T-cells	T cells CD8+	T_cells_c4_CD8+_ZFP36	HER2+	no_gene_module	no_scTYPER_call	no_inferCNV_call	no_CNA_value
CID3586_CCATGTCAGCACAGGT	CID3586	4.01319	1819	822	T-cells	T cells CD8+	T_cells_c4_CD8+_ZFP36	HER2+	no_gene_module	no_scTYPER_call	no_inferCNV_call	no_CNA_value
CID3586_CCATGTCGTGCAACTT	CID3586	3.55093	2788	1313	T-cells	T cells CD8+	T_cells_c4_CD8+_ZFP36	HER2+	no_gene_module	no_scTYPER_call	no_inferCNV_call	no_CNA_value
CID3586_CCATGTCTCGGTCTAA	CID3586	4.23953	1887	832	T-cells	T cells CD8+	T_cells_c4_CD8+_ZFP36	HER2+	no_gene_module	no_scTYPER_call	no_inferCNV_call	no_CNA_value
CID3586_CCGGGATTCGTATCAG	CID3586	2.58216	2556	903	T-cells	T cells CD8+	T_cells_c4_CD8+_ZFP36	HER2+	no_gene_module	no_scTYPER_call	no_inferCNV_call	no_CNA_value
CID3586_CCGTACTCACGTTGGC	CID3586	5.89971	2373	880	T-cells	T cells CD8+	T_cells_c4_CD8+_ZFP36	HER2+	no_gene_module	no_scTYPER_call	no_inferCNV_call	no_CNA_value
CID3586_CCGTTCACAGATCTGT	CID3586	3.58275	3154	993	T-cells	T cells CD8+	T_cells_c4_CD8+_ZFP36	HER2+	no_gene_module	no_scTYPER_call	no_inferCNV_call	no_CNA_value
CID3586_CCTAAAGCACGGTGTC	CID3586	4.47598	3664	1341	T-cells	T cells CD8+	T_cells_c4_CD8+_ZFP36	HER2+	no_gene_module	no_scTYPER_call	no_inferCNV_call	no_CNA_value
CID3586_CCTAAAGTCCACGACG	CID3586	5.14493	2760	1181	T-cells	T cells CD8+	T_cells_c4_CD8+_ZFP36	HER2+	no_gene_module	no_scTYPER_call	no_inferCNV_call	no_CNA_value
CID3586_CCTACCACAAAGGCGT	CID3586	4.41604	1721	919	T-cells	T cells CD8+	T_cells_c4_CD8+_ZFP36	HER2+	no_gene_module	no_scTYPER_call	no_inferCNV_call	no_CNA_value
CID3586_CCTACCAGTCAATACC	CID3586	5.3443	973	510	T-cells	T cells CD8+	T_cells_c4_CD8+_ZFP36	HER2+	no_gene_module	no_scTYPER_call	no_inferCNV_call	no_CNA_value
CID3586_CCTAGCTGTCAACATC	CID3586	3.41246	2022	918	T-cells	T cells CD8+	T_cells_c4_CD8+_ZFP36	HER2+	no_gene_module	no_scTYPER_call	no_inferCNV_call	no_CNA_value
CID3586_CCTAGCTGTTCTGGTA	CID3586	2.6898	2305	865	T-cells	T cells CD8+	T_cells_c4_CD8+_ZFP36	HER2+	no_gene_module	no_scTYPER_call	no_inferCNV_call	no_CNA_value
CID3586_CCTATTAAGAAGAAGC	CID3586	5.30035	1132	540	T-cells	T cells CD8+	T_cells_c4_CD8+_ZFP36	HER2+	no_gene_module	no_scTYPER_call	no_inferCNV_call	no_CNA_value
CID3586_CCTTACGAGTGGACGT	CID3586	3.54223	1835	814	T-cells	T cells CD8+	T_cells_c4_CD8+_ZFP36	HER2+	no_gene_module	no_scTYPER_call	no_inferCNV_call	no_CNA_value
CID3586_CCTTACGAGTTAACGA	CID3586	6.50224	2230	978	T-cells	T cells CD8+	T_cells_c4_CD8+_ZFP36	HER2+	no_gene_module	no_scTYPER_call	no_inferCNV_call	no_CNA_value
CID3586_CCTTACGTCGGAAATA	CID3586	3.8873	2804	973	T-cells	T cells CD8+	T_cells_c4_CD8+_ZFP36	HER2+	no_gene_module	no_scTYPER_call	no_inferCNV_call	no_CNA_value
CID3586_CCTTCGAAGCAATCTC	CID3586	4.42073	1312	623	T-cells	T cells CD8+	T_cells_c4_CD8+_ZFP36	HER2+	no_gene_module	no_scTYPER_call	no_inferCNV_call	no_CNA_value
CID3586_CCTTCGACAAGCGTAG	CID3586	1.85417	3991	1281	T-cells	T cells CD8+	T_cells_c4_CD8+_ZFP36	HER2+	no_gene_module	no_scTYPER_call	no_inferCNV_call	no_CNA_value
CID3586_CCTTTCTGTAGTGAAT	CID3586	6.38978	3756	1586	T-cells	T cells CD8+	T_cells_c4_CD8+_ZFP36	HER2+	no_gene_module	no_scTYPER_call	no_inferCNV_call	no_CNA_value
CID3586_CGAACATAGATGTAAC	CID3586	4.86275	2550	1009	T-cells	T cells CD8+	T_cells_c4_CD8+_ZFP36	HER2+	no_gene_module	no_scTYPER_call	no_inferCNV_call	no_CNA_value
CID3586_CGAACATAGCTGAAAT	CID3586	5.80676	2101	784	T-cells	T cells CD8+	T_cells_c4_CD8+_ZFP36	HER2+	no_gene_module	no_scTYPER_call	no_inferCNV_call	no_CNA_value
CID3586_CGAACATCACTTAACG	CID3586	3.56595	2608	1057	T-cells	T cells CD8+	T_cells_c4_CD8+_ZFP36	HER2+	no_gene_module	no_scTYPER_call	no_inferCNV_call	no_CNA_value
CID3586_CGAATGTCACATGACT	CID3586	6.45995	1548	724	T-cells	T cells CD8+	T_cells_c4_CD8+_ZFP36	HER2+	no_gene_module	no_scTYPER_call	no_inferCNV_call	no_CNA_value
CID3586_CGACCTTCAGCTCGCA	CID3586	5.13377	2766	1030	T-cells	T cells CD8+	T_cells_c4_CD8+_ZFP36	HER2+	no_gene_module	no_scTYPER_call	no_inferCNV_call	no_CNA_value
CID3586_CGACCTTCAGGAATCG	CID3586	4.59519	2285	912	T-cells	T cells CD8+	T_cells_c4_CD8+_ZFP36	HER2+	no_gene_module	no_scTYPER_call	no_inferCNV_call	no_CNA_value
CID3586_CGACCTTGTTACGCGC	CID3586	2.783	2659	1060	T-cells	T cells CD8+	T_cells_c4_CD8+_ZFP36	HER2+	no_gene_module	no_scTYPER_call	no_inferCNV_call	no_CNA_value
CID3586_CGACCTTTCTAACTCT	CID3586	10.5503	3071	1137	T-cells	T cells CD8+	T_cells_c4_CD8+_ZFP36	HER2+	no_gene_module	no_scTYPER_call	no_inferCNV_call	no_CNA_value
CID3586_CGAGAAGAGTGAACGC	CID3586	4.7678	1615	797	T-cells	T cells CD8+	T_cells_c4_CD8+_ZFP36	HER2+	no_gene_module	no_scTYPER_call	no_inferCNV_call	no_CNA_value
CID3586_CGAGAAGGTTCTGTTT	CID3586	3.12735	2654	919	T-cells	T cells CD8+	T_cells_c4_CD8+_ZFP36	HER2+	no_gene_module	no_scTYPER_call	no_inferCNV_call	no_CNA_value
CID3586_CGAGAAGTCTGCAGTA	CID3586	3.32268	1565	829	T-cells	T cells CD8+	T_cells_c4_CD8+_ZFP36	HER2+	no_gene_module	no_scTYPER_call	no_inferCNV_call	no_CNA_value
CID3586_CGAGCACGTTTGTTTC	CID3586	4.99212	1903	836	T-cells	T cells CD8+	T_cells_c4_CD8+_ZFP36	HER2+	no_gene_module	no_scTYPER_call	no_inferCNV_call	no_CNA_value
CID3586_CGATCGGAGTCCAGGA	CID3586	4.46067	1233	663	T-cells	T cells CD8+	T_cells_c4_CD8+_ZFP36	HER2+	no_gene_module	no_scTYPER_call	no_inferCNV_call	no_CNA_value
CID3586_CGATCGGCAAAGGCGT	CID3586	4.04255	1410	630	T-cells	T cells CD8+	T_cells_c4_CD8+_ZFP36	HER2+	no_gene_module	no_scTYPER_call	no_inferCNV_call	no_CNA_value
CID3586_CGATCGGGTCTAGTCA	CID3586	4.44079	1824	785	T-cells	T cells CD8+	T_cells_c4_CD8+_ZFP36	HER2+	no_gene_module	no_scTYPER_call	no_inferCNV_call	no_CNA_value
CID3586_CGATGGCTCAGTCCCT	CID3586	6.11052	1882	817	T-cells	T cells CD8+	T_cells_c4_CD8+_ZFP36	HER2+	no_gene_module	no_scTYPER_call	no_inferCNV_call	no_CNA_value
CID3586_CGATGGCTCCGCAGTG	CID3586	5.26815	2107	1001	T-cells	T cells CD8+	T_cells_c4_CD8+_ZFP36	HER2+	no_gene_module	no_scTYPER_call	no_inferCNV_call	no_CNA_value
CID3586_CGCCAAGCAAGTCTGT	CID3586	4.9483	2708	1139	T-cells	T cells CD8+	T_cells_c4_CD8+_ZFP36	HER2+	no_gene_module	no_scTYPER_call	no_inferCNV_call	no_CNA_value
CID3586_CGCGGTAGTTCGCGAC	CID3586	2.39437	1420	666	T-cells	T cells CD8+	T_cells_c4_CD8+_ZFP36	HER2+	no_gene_module	no_scTYPER_call	no_inferCNV_call	no_CNA_value
CID3586_CGCGTTTAGCCTATGT	CID3586	3.90652	2867	1027	T-cells	T cells CD8+	T_cells_c4_CD8+_ZFP36	HER2+	no_gene_module	no_scTYPER_call	no_inferCNV_call	no_CNA_value
CID3586_CGCTATCGTCGAACAG	CID3586	3.03678	2338	857	T-cells	T cells CD8+	T_cells_c4_CD8+_ZFP36	HER2+	no_gene_module	no_scTYPER_call	no_inferCNV_call	no_CNA_value
CID3586_CGCTATCTCAGAAATG	CID3586	3.85823	2229	1005	T-cells	T cells CD8+	T_cells_c4_CD8+_ZFP36	HER2+	no_gene_module	no_scTYPER_call	no_inferCNV_call	no_CNA_value
CID3586_CGCTATCTCGGAGGTA	CID3586	5.25526	2664	962	T-cells	T cells CD8+	T_cells_c4_CD8+_ZFP36	HER2+	no_gene_module	no_scTYPER_call	no_inferCNV_call	no_CNA_value
CID3586_CGCTGGAGTCCGAACC	CID3586	3.44636	1799	752	T-cells	T cells CD8+	T_cells_c4_CD8+_ZFP36	HER2+	no_gene_module	no_scTYPER_call	no_inferCNV_call	no_CNA_value
CID3586_CGCTTCACAGGTCTCG	CID3586	4.8317	1842	876	T-cells	T cells CD8+	T_cells_c4_CD8+_ZFP36	HER2+	no_gene_module	no_scTYPER_call	no_inferCNV_call	no_CNA_value
CID3586_CGCTTCAGTTCCATGA	CID3586	3.30673	1754	738	T-cells	T cells CD8+	T_cells_c4_CD8+_ZFP36	HER2+	no_gene_module	no_scTYPER_call	no_inferCNV_call	no_CNA_value
CID3586_CGCTTCATCGTTTGCC	CID3586	2.57992	1783	895	T-cells	T cells CD8+	T_cells_c4_CD8+_ZFP36	HER2+	no_gene_module	no_scTYPER_call	no_inferCNV_call	no_CNA_value
CID3586_CGGACACAGATCCTGT	CID3586	4.3956	2184	839	T-cells	T cells CD8+	T_cells_c4_CD8+_ZFP36	HER2+	no_gene_module	no_scTYPER_call	no_inferCNV_call	no_CNA_value
CID3586_CGGACACAGCGTGTCC	CID3586	2.80374	963	522	T-cells	T cells CD8+	T_cells_c4_CD8+_ZFP36	HER2+	no_gene_module	no_scTYPER_call	no_inferCNV_call	no_CNA_value
CID3586_CGGAGCTCATCACCCT	CID3586	4.414	1971	804	T-cells	T cells CD8+	T_cells_c4_CD8+_ZFP36	HER2+	no_gene_module	no_scTYPER_call	no_inferCNV_call	no_CNA_value
CID3586_CGGAGTCCAAGCCGCT	CID3586	4.57173	1903	728	T-cells	T cells CD8+	T_cells_c4_CD8+_ZFP36	HER2+	no_gene_module	no_scTYPER_call	no_inferCNV_call	no_CNA_value
CID3586_CGTAGCGAGAATGTGT	CID3586	5.12821	2223	935	T-cells	T cells CD8+	T_cells_c4_CD8+_ZFP36	HER2+	no_gene_module	no_scTYPER_call	no_inferCNV_call	no_CNA_value
CID3586_CGTCACTAGCGCTCCA	CID3586	5.75342	1460	565	T-cells	T cells CD8+	T_cells_c4_CD8+_ZFP36	HER2+	no_gene_module	no_scTYPER_call	no_inferCNV_call	no_CNA_value
CID3586_CGTCACTTCGGATGTT	CID3586	2.55428	1566	652	T-cells	T cells CD8+	T_cells_c4_CD8+_ZFP36	HER2+	no_gene_module	no_scTYPER_call	no_inferCNV_call	no_CNA_value
CID3586_CGTGAGCCAACACGCC	CID3586	4.84392	1858	868	T-cells	T cells CD8+	T_cells_c4_CD8+_ZFP36	HER2+	no_gene_module	no_scTYPER_call	no_inferCNV_call	no_CNA_value
CID3586_CGTGTAAAGGGAAACA	CID3586	4.86745	2301	889	T-cells	T cells CD8+	T_cells_c4_CD8+_ZFP36	HER2+	no_gene_module	no_scTYPER_call	no_inferCNV_call	no_CNA_value
CID3586_CGTTAGAAGAAACCGC	CID3586	5.53256	2657	991	T-cells	T cells CD8+	T_cells_c4_CD8+_ZFP36	HER2+	no_gene_module	no_scTYPER_call	no_inferCNV_call	no_CNA_value
CID3586_CGTTAGAGTGGACGAT	CID3586	3.80762	2994	1083	T-cells	T cells CD8+	T_cells_c4_CD8+_ZFP36	HER2+	no_gene_module	no_scTYPER_call	no_inferCNV_call	no_CNA_value
CID3586_CGTTCTGAGGTTCCTA	CID3586	3.54518	2313	1019	T-cells	T cells CD8+	T_cells_c4_CD8+_ZFP36	HER2+	no_gene_module	no_scTYPER_call	no_inferCNV_call	no_CNA_value
CID3586_CGTTGGGTCCCGGATG	CID3586	2.12895	1644	704	T-cells	T cells CD8+	T_cells_c4_CD8+_ZFP36	HER2+	no_gene_module	no_scTYPER_call	no_inferCNV_call	no_CNA_value
CID3586_CTAAGACTCAATCACG	CID3586	2.15054	1860	811	T-cells	T cells CD8+	T_cells_c4_CD8+_ZFP36	HER2+	no_gene_module	no_scTYPER_call	no_inferCNV_call	no_CNA_value
CID3586_CTACACCTCTCGATGA	CID3586	3.47924	1782	668	T-cells	T cells CD8+	T_cells_c4_CD8+_ZFP36	HER2+	no_gene_module	no_scTYPER_call	no_inferCNV_call	no_CNA_value
CID3586_CTACCCAGTGGCAAAC	CID3586	3.94464	1445	665	T-cells	T cells CD8+	T_cells_c4_CD8+_ZFP36	HER2+	no_gene_module	no_scTYPER_call	no_inferCNV_call	no_CNA_value
CID3586_CTACGTCCAGCATGAG	CID3586	4.85813	2326	894	T-cells	T cells CD8+	T_cells_c4_CD8+_ZFP36	HER2+	no_gene_module	no_scTYPER_call	no_inferCNV_call	no_CNA_value
CID3586_CTAGAGTAGGGTTCCC	CID3586	3.99543	1752	626	T-cells	T cells CD8+	T_cells_c4_CD8+_ZFP36	HER2+	no_gene_module	no_scTYPER_call	no_inferCNV_call	no_CNA_value
CID3586_CTAGAGTGTCCTGCTT	CID3586	6.27063	1818	658	T-cells	T cells CD8+	T_cells_c4_CD8+_ZFP36	HER2+	no_gene_module	no_scTYPER_call	no_inferCNV_call	no_CNA_value
CID3586_CTAGCCTCAAGCCATT	CID3586	11.3284	1483	645	T-cells	T cells CD8+	T_cells_c4_CD8+_ZFP36	HER2+	no_gene_module	no_scTYPER_call	no_inferCNV_call	no_CNA_value
CID3586_CTCACACTCTAACGGT	CID3586	2.71654	2540	1006	T-cells	T cells CD8+	T_cells_c4_CD8+_ZFP36	HER2+	no_gene_module	no_scTYPER_call	no_inferCNV_call	no_CNA_value
CID3586_CTCAGAAAGCTATGCT	CID3586	2.94442	2717	1003	T-cells	T cells CD8+	T_cells_c4_CD8+_ZFP36	HER2+	no_gene_module	no_scTYPER_call	no_inferCNV_call	no_CNA_value
CID3586_CTCATTAGTGGTGTAG	CID3586	5.0442	1923	959	T-cells	T cells CD8+	T_cells_c4_CD8+_ZFP36	HER2+	no_gene_module	no_scTYPER_call	no_inferCNV_call	no_CNA_value
CID3586_CTCCTAGGTCTAGTGT	CID3586	4.04651	2150	904	T-cells	T cells CD8+	T_cells_c4_CD8+_ZFP36	HER2+	no_gene_module	no_scTYPER_call	no_inferCNV_call	no_CNA_value
CID3586_CTCGAAACAGCGAACA	CID3586	5.96546	1911	798	T-cells	T cells CD8+	T_cells_c4_CD8+_ZFP36	HER2+	no_gene_module	no_scTYPER_call	no_inferCNV_call	no_CNA_value
CID3586_CTCGAAATCGGAGGTA	CID3586	5.55556	1566	695	T-cells	T cells CD8+	T_cells_c4_CD8+_ZFP36	HER2+	no_gene_module	no_scTYPER_call	no_inferCNV_call	no_CNA_value
CID3586_CTCGAGGAGAGTGAGA	CID3586	2.8436	2321	907	T-cells	T cells CD8+	T_cells_c4_CD8+_ZFP36	HER2+	no_gene_module	no_scTYPER_call	no_inferCNV_call	no_CNA_value
CID3586_CTCGAGGAGGCGCTCT	CID3586	3.96825	2520	791	T-cells	T cells CD8+	T_cells_c4_CD8+_ZFP36	HER2+	no_gene_module	no_scTYPER_call	no_inferCNV_call	no_CNA_value
CID3586_CTCGGAGTCTTGGGTA	CID3586	5.03876	2322	797	T-cells	T cells CD8+	T_cells_c4_CD8+_ZFP36	HER2+	no_gene_module	no_scTYPER_call	no_inferCNV_call	no_CNA_value
CID3586_CTCGGGAAGCGATTCT	CID3586	1.84295	1248	520	T-cells	T cells CD8+	T_cells_c4_CD8+_ZFP36	HER2+	no_gene_module	no_scTYPER_call	no_inferCNV_call	no_CNA_value
CID3586_CTCGTACGTCTCTCTG	CID3586	1.41304	1840	934	T-cells	T cells CD8+	T_cells_c4_CD8+_ZFP36	HER2+	no_gene_module	no_scTYPER_call	no_inferCNV_call	no_CNA_value
CID3586_CTCTGGTCACTATCTT	CID3586	4.65904	2361	1038	T-cells	T cells CD8+	T_cells_c4_CD8+_ZFP36	HER2+	no_gene_module	no_scTYPER_call	no_inferCNV_call	no_CNA_value
CID3586_CTCTGGTGTTCGCTAA	CID3586	3.73541	2570	977	T-cells	T cells CD8+	T_cells_c4_CD8+_ZFP36	HER2+	no_gene_module	no_scTYPER_call	no_inferCNV_call	no_CNA_value
CID3586_CTGAAGTGTTAGAACA	CID3586	7.1964	2001	935	T-cells	T cells CD8+	T_cells_c4_CD8+_ZFP36	HER2+	no_gene_module	no_scTYPER_call	no_inferCNV_call	no_CNA_value
CID3586_CTGATCCAGCTACCTA	CID3586	3.60374	6632	2061	T-cells	T cells CD8+	T_cells_c4_CD8+_ZFP36	HER2+	no_gene_module	no_scTYPER_call	no_inferCNV_call	no_CNA_value
CID3586_CTGATCCGTGCCTGCA	CID3586	6.73604	1826	725	T-cells	T cells CD8+	T_cells_c4_CD8+_ZFP36	HER2+	no_gene_module	no_scTYPER_call	no_inferCNV_call	no_CNA_value
CID3586_CTGATCCTCACTTACT	CID3586	6.24196	1554	738	T-cells	T cells CD8+	T_cells_c4_CD8+_ZFP36	HER2+	no_gene_module	no_scTYPER_call	no_inferCNV_call	no_CNA_value
CID3586_CTGATCCTCTTTAGTC	CID3586	2.97667	2486	1010	T-cells	T cells CD8+	T_cells_c4_CD8+_ZFP36	HER2+	no_gene_module	no_scTYPER_call	no_inferCNV_call	no_CNA_value
CID3586_CTGCGGAAGCACACAG	CID3586	4.47565	2279	1007	T-cells	T cells CD8+	T_cells_c4_CD8+_ZFP36	HER2+	no_gene_module	no_scTYPER_call	no_inferCNV_call	no_CNA_value
CID3586_CTGGTCTTCAGTTAGC	CID3586	4.90542	3119	1104	T-cells	T cells CD8+	T_cells_c4_CD8+_ZFP36	HER2+	no_gene_module	no_scTYPER_call	no_inferCNV_call	no_CNA_value
CID3586_CTGTGCTGTCTAGTGT	CID3586	5.22281	2087	905	T-cells	T cells CD8+	T_cells_c4_CD8+_ZFP36	HER2+	no_gene_module	no_scTYPER_call	no_inferCNV_call	no_CNA_value
CID3586_CTGTTTAAGTCAATAG	CID3586	6.0024	1666	711	T-cells	T cells CD8+	T_cells_c4_CD8+_ZFP36	HER2+	no_gene_module	no_scTYPER_call	no_inferCNV_call	no_CNA_value
CID3586_CTTAACTTCTAACTTC	CID3586	5.86166	853	451	T-cells	T cells CD8+	T_cells_c4_CD8+_ZFP36	HER2+	no_gene_module	no_scTYPER_call	no_inferCNV_call	no_CNA_value
CID3586_GAAACTCGTGAGGGTT	CID3586	7.03576	1734	874	T-cells	T cells CD8+	T_cells_c4_CD8+_ZFP36	HER2+	no_gene_module	no_scTYPER_call	no_inferCNV_call	no_CNA_value
CID3586_GAAATGAGTAGGCATG	CID3586	4.04151	1831	783	T-cells	T cells CD8+	T_cells_c4_CD8+_ZFP36	HER2+	no_gene_module	no_scTYPER_call	no_inferCNV_call	no_CNA_value
CID3586_GAACATCAGATCTGAA	CID3586	2.95617	2943	1068	T-cells	T cells CD8+	T_cells_c4_CD8+_ZFP36	HER2+	no_gene_module	no_scTYPER_call	no_inferCNV_call	no_CNA_value
CID3586_GAACCTAGTCGAACAG	CID3586	3.27242	2353	771	T-cells	T cells CD8+	T_cells_c4_CD8+_ZFP36	HER2+	no_gene_module	no_scTYPER_call	no_inferCNV_call	no_CNA_value
CID3586_GAAGCAGCAGCGAACA	CID3586	5.20945	1862	793	T-cells	T cells CD8+	T_cells_c4_CD8+_ZFP36	HER2+	no_gene_module	no_scTYPER_call	no_inferCNV_call	no_CNA_value
CID3586_GAATAAGCAGGGATTG	CID3586	5.36246	2014	799	T-cells	T cells CD8+	T_cells_c4_CD8+_ZFP36	HER2+	no_gene_module	no_scTYPER_call	no_inferCNV_call	no_CNA_value
CID3586_GAATAAGCATTGGTAC	CID3586	4.34487	2946	939	T-cells	T cells CD8+	T_cells_c4_CD8+_ZFP36	HER2+	no_gene_module	no_scTYPER_call	no_inferCNV_call	no_CNA_value
CID3586_GAATAAGGTCACCCAG	CID3586	5.35433	1905	858	T-cells	T cells CD8+	T_cells_c4_CD8+_ZFP36	HER2+	no_gene_module	no_scTYPER_call	no_inferCNV_call	no_CNA_value
CID3586_GAATGAACAAGTCTGT	CID3586	4.01376	1744	713	T-cells	T cells CD8+	T_cells_c4_CD8+_ZFP36	HER2+	no_gene_module	no_scTYPER_call	no_inferCNV_call	no_CNA_value
CID3586_GAATGAATCGCCATAA	CID3586	3.20665	2526	959	T-cells	T cells CD8+	T_cells_c4_CD8+_ZFP36	HER2+	no_gene_module	no_scTYPER_call	no_inferCNV_call	no_CNA_value
CID3586_GACACGCAGTACGTAA	CID3586	3.58575	4490	1499	T-cells	T cells CD8+	T_cells_c4_CD8+_ZFP36	HER2+	no_gene_module	no_scTYPER_call	no_inferCNV_call	no_CNA_value
CID3586_GACCAATTCAAGATCC	CID3586	3.08176	1590	707	T-cells	T cells CD8+	T_cells_c4_CD8+_ZFP36	HER2+	no_gene_module	no_scTYPER_call	no_inferCNV_call	no_CNA_value
CID3586_GACCTGGTCTTGTTTG	CID3586	4.1411	1304	612	T-cells	T cells CD8+	T_cells_c4_CD8+_ZFP36	HER2+	no_gene_module	no_scTYPER_call	no_inferCNV_call	no_CNA_value
CID3586_GACGGCTGTCCGACGT	CID3586	3.39241	1975	818	T-cells	T cells CD8+	T_cells_c4_CD8+_ZFP36	HER2+	no_gene_module	no_scTYPER_call	no_inferCNV_call	no_CNA_value
CID3586_GACTGCGAGCGTCTAT	CID3586	1.46684	1568	794	T-cells	T cells CD8+	T_cells_c4_CD8+_ZFP36	HER2+	no_gene_module	no_scTYPER_call	no_inferCNV_call	no_CNA_value
CID3586_GACTGCGCAGCTCCGA	CID3586	2.09424	2292	839	T-cells	T cells CD8+	T_cells_c4_CD8+_ZFP36	HER2+	no_gene_module	no_scTYPER_call	no_inferCNV_call	no_CNA_value
CID3586_GAGCAGAAGTCTCCTC	CID3586	4.55686	2392	965	T-cells	T cells CD8+	T_cells_c4_CD8+_ZFP36	HER2+	no_gene_module	no_scTYPER_call	no_inferCNV_call	no_CNA_value
CID3586_GAGCAGAGTCCAAGTT	CID3586	6.12864	1648	767	T-cells	T cells CD8+	T_cells_c4_CD8+_ZFP36	HER2+	no_gene_module	no_scTYPER_call	no_inferCNV_call	no_CNA_value
CID3586_GAGGTGAGTATCGCAT	CID3586	7.03812	1705	752	T-cells	T cells CD8+	T_cells_c4_CD8+_ZFP36	HER2+	no_gene_module	no_scTYPER_call	no_inferCNV_call	no_CNA_value
CID3586_GATCAGTCAAATACAG	CID3586	5.85752	1895	833	T-cells	T cells CD8+	T_cells_c4_CD8+_ZFP36	HER2+	no_gene_module	no_scTYPER_call	no_inferCNV_call	no_CNA_value
CID3586_GATCGCGGTTGTGGCC	CID3586	7.87671	2336	1049	T-cells	T cells CD8+	T_cells_c4_CD8+_ZFP36	HER2+	no_gene_module	no_scTYPER_call	no_inferCNV_call	no_CNA_value
CID3586_GATCTAGCAAACTGTC	CID3586	5.95863	6478	1752	T-cells	T cells CD8+	T_cells_c4_CD8+_ZFP36	HER2+	no_gene_module	no_scTYPER_call	no_inferCNV_call	no_CNA_value
CID3586_GATGAAAAGTGCGATG	CID3586	4.88194	3134	1036	T-cells	T cells CD8+	T_cells_c4_CD8+_ZFP36	HER2+	no_gene_module	no_scTYPER_call	no_inferCNV_call	no_CNA_value
CID3586_GATGAAAGTCACAAGG	CID3586	7.57072	2404	898	T-cells	T cells CD8+	T_cells_c4_CD8+_ZFP36	HER2+	no_gene_module	no_scTYPER_call	no_inferCNV_call	no_CNA_value
CID3586_GATGAAAGTTTAGCTG	CID3586	2.81266	1991	901	T-cells	T cells CD8+	T_cells_c4_CD8+_ZFP36	HER2+	no_gene_module	no_scTYPER_call	no_inferCNV_call	no_CNA_value
CID3586_GATGAGGAGAAAGTGG	CID3586	5.17378	2532	901	T-cells	T cells CD8+	T_cells_c4_CD8+_ZFP36	HER2+	no_gene_module	no_scTYPER_call	no_inferCNV_call	no_CNA_value
CID3586_GATGAGGAGAGACTTA	CID3586	6.51709	1872	973	T-cells	T cells CD8+	T_cells_c4_CD8+_ZFP36	HER2+	no_gene_module	no_scTYPER_call	no_inferCNV_call	no_CNA_value
CID3586_GATGAGGGTCATCCCT	CID3586	5.30612	1470	668	T-cells	T cells CD8+	T_cells_c4_CD8+_ZFP36	HER2+	no_gene_module	no_scTYPER_call	no_inferCNV_call	no_CNA_value
CID3586_GATGCTAAGTTGTCGT	CID3586	4.18006	2177	896	T-cells	T cells CD8+	T_cells_c4_CD8+_ZFP36	HER2+	no_gene_module	no_scTYPER_call	no_inferCNV_call	no_CNA_value
CID3586_GATTCAGAGAACAATC	CID3586	6.24071	2019	862	T-cells	T cells CD8+	T_cells_c4_CD8+_ZFP36	HER2+	no_gene_module	no_scTYPER_call	no_inferCNV_call	no_CNA_value
CID3586_GCAATCACATTCACTT	CID3586	3.60285	2387	909	T-cells	T cells CD8+	T_cells_c4_CD8+_ZFP36	HER2+	no_gene_module	no_scTYPER_call	no_inferCNV_call	no_CNA_value
CID3586_GCAATCAGTACCGAGA	CID3586	5.66219	2084	805	T-cells	T cells CD8+	T_cells_c4_CD8+_ZFP36	HER2+	no_gene_module	no_scTYPER_call	no_inferCNV_call	no_CNA_value
CID3586_GCAATCAGTTGGTTTG	CID3586	4.02488	5466	1681	T-cells	T cells CD8+	T_cells_c4_CD8+_ZFP36	HER2+	no_gene_module	no_scTYPER_call	no_inferCNV_call	no_CNA_value
CID3586_GCACATATCGCCGTGA	CID3586	4.04545	2200	796	T-cells	T cells CD8+	T_cells_c4_CD8+_ZFP36	HER2+	no_gene_module	no_scTYPER_call	no_inferCNV_call	no_CNA_value
CID3586_GCACTCTTCAATACCG	CID3586	3.08173	2239	966	T-cells	T cells CD8+	T_cells_c4_CD8+_ZFP36	HER2+	no_gene_module	no_scTYPER_call	no_inferCNV_call	no_CNA_value
CID3586_GCAGCCAGTCAACATC	CID3586	4.20054	2214	776	T-cells	T cells CD8+	T_cells_c4_CD8+_ZFP36	HER2+	no_gene_module	no_scTYPER_call	no_inferCNV_call	no_CNA_value
CID3586_GCAGTTAAGCCACGTC	CID3586	3.37621	2488	950	T-cells	T cells CD8+	T_cells_c4_CD8+_ZFP36	HER2+	no_gene_module	no_scTYPER_call	no_inferCNV_call	no_CNA_value
CID3586_GCAGTTAAGCGTTTAC	CID3586	4.19026	1766	684	T-cells	T cells CD8+	T_cells_c4_CD8+_ZFP36	HER2+	no_gene_module	no_scTYPER_call	no_inferCNV_call	no_CNA_value
CID3586_GCATACACACCAGATT	CID3586	4.75146	1368	559	T-cells	T cells CD8+	T_cells_c4_CD8+_ZFP36	HER2+	no_gene_module	no_scTYPER_call	no_inferCNV_call	no_CNA_value
CID3586_GCATGCGCACAAGACG	CID3586	5.13356	2396	870	T-cells	T cells CD8+	T_cells_c4_CD8+_ZFP36	HER2+	no_gene_module	no_scTYPER_call	no_inferCNV_call	no_CNA_value
CID3586_GCATGCGCATTGCGGC	CID3586	4.54097	2026	839	T-cells	T cells CD8+	T_cells_c4_CD8+_ZFP36	HER2+	no_gene_module	no_scTYPER_call	no_inferCNV_call	no_CNA_value
CID3586_GCATGCGGTTGATTCG	CID3586	4.46163	1681	782	T-cells	T cells CD8+	T_cells_c4_CD8+_ZFP36	HER2+	no_gene_module	no_scTYPER_call	no_inferCNV_call	no_CNA_value
CID3586_GCATGTAGTGAAGGCT	CID3586	4.32099	2106	1027	T-cells	T cells CD8+	T_cells_c4_CD8+_ZFP36	HER2+	no_gene_module	no_scTYPER_call	no_inferCNV_call	no_CNA_value
CID3586_GCATGTAGTTTCGCTC	CID3586	6.94698	1641	774	T-cells	T cells CD8+	T_cells_c4_CD8+_ZFP36	HER2+	no_gene_module	no_scTYPER_call	no_inferCNV_call	no_CNA_value
CID3586_GCCAAATTCTTTAGGG	CID3586	7.41537	1861	759	T-cells	T cells CD8+	T_cells_c4_CD8+_ZFP36	HER2+	no_gene_module	no_scTYPER_call	no_inferCNV_call	no_CNA_value
CID3586_GCCTCTAAGCTGGAAC	CID3586	1.75211	1541	818	T-cells	T cells CD8+	T_cells_c4_CD8+_ZFP36	HER2+	no_gene_module	no_scTYPER_call	no_inferCNV_call	no_CNA_value
CID3586_GCGACCAAGTGGGTTG	CID3586	3.57297	2323	834	T-cells	T cells CD8+	T_cells_c4_CD8+_ZFP36	HER2+	no_gene_module	no_scTYPER_call	no_inferCNV_call	no_CNA_value
CID3586_GCGACCACAAAGTGCG	CID3586	5.64935	1540	741	T-cells	T cells CD8+	T_cells_c4_CD8+_ZFP36	HER2+	no_gene_module	no_scTYPER_call	no_inferCNV_call	no_CNA_value
CID3586_GCGACCACAATGGAAT	CID3586	4.54139	5593	1562	T-cells	T cells CD8+	T_cells_c4_CD8+_ZFP36	HER2+	no_gene_module	no_scTYPER_call	no_inferCNV_call	no_CNA_value
CID3586_GCGACCAGTACTCAAC	CID3586	5.09259	2592	878	T-cells	T cells CD8+	T_cells_c4_CD8+_ZFP36	HER2+	no_gene_module	no_scTYPER_call	no_inferCNV_call	no_CNA_value
CID3586_GCGAGAAAGCAGCGTA	CID3586	5.75916	1337	726	T-cells	T cells CD8+	T_cells_c4_CD8+_ZFP36	HER2+	no_gene_module	no_scTYPER_call	no_inferCNV_call	no_CNA_value
CID3586_GCGAGAATCTACTTAC	CID3586	4.7619	2247	891	T-cells	T cells CD8+	T_cells_c4_CD8+_ZFP36	HER2+	no_gene_module	no_scTYPER_call	no_inferCNV_call	no_CNA_value
CID3586_GCGCAACAGAAACCGC	CID3586	2.46286	2558	821	T-cells	T cells CD8+	T_cells_c4_CD8+_ZFP36	HER2+	no_gene_module	no_scTYPER_call	no_inferCNV_call	no_CNA_value
CID3586_GCGCAACAGCATGGCA	CID3586	3.02158	4170	1337	T-cells	T cells CD8+	T_cells_c4_CD8+_ZFP36	HER2+	no_gene_module	no_scTYPER_call	no_inferCNV_call	no_CNA_value
CID3586_GCGCAGTTCAGCTTAG	CID3586	6.76113	2470	870	T-cells	T cells CD8+	T_cells_c4_CD8+_ZFP36	HER2+	no_gene_module	no_scTYPER_call	no_inferCNV_call	no_CNA_value
CID3586_GCGGGTTGTAAGTGGC	CID3586	10.7112	1139	665	T-cells	T cells CD8+	T_cells_c4_CD8+_ZFP36	HER2+	no_gene_module	no_scTYPER_call	no_inferCNV_call	no_CNA_value
CID3586_GCTGCGACAGCCAATT	CID3586	8.30793	2624	925	T-cells	T cells CD8+	T_cells_c4_CD8+_ZFP36	HER2+	no_gene_module	no_scTYPER_call	no_inferCNV_call	no_CNA_value
CID3586_GCTGCTTGTGCGGTAA	CID3586	3.859	2695	1007	T-cells	T cells CD8+	T_cells_c4_CD8+_ZFP36	HER2+	no_gene_module	no_scTYPER_call	no_inferCNV_call	no_CNA_value
CID3586_GCTGGGTAGCCAGTAG	CID3586	3.44425	3426	1189	T-cells	T cells CD8+	T_cells_c4_CD8+_ZFP36	HER2+	no_gene_module	no_scTYPER_call	no_inferCNV_call	no_CNA_value
CID3586_GCTTCCAGTGTGAAAT	CID3586	4.17071	2062	820	T-cells	T cells CD8+	T_cells_c4_CD8+_ZFP36	HER2+	no_gene_module	no_scTYPER_call	no_inferCNV_call	no_CNA_value
CID3586_GCTTGAAAGAGACGAA	CID3586	5.59785	2233	850	T-cells	T cells CD8+	T_cells_c4_CD8+_ZFP36	HER2+	no_gene_module	no_scTYPER_call	no_inferCNV_call	no_CNA_value
CID3586_GCTTGAAAGATGCCTT	CID3586	6.14869	1789	840	T-cells	T cells CD8+	T_cells_c4_CD8+_ZFP36	HER2+	no_gene_module	no_scTYPER_call	no_inferCNV_call	no_CNA_value
CID3586_GGAACTTCATGGAATA	CID3586	6.70908	1729	764	T-cells	T cells CD8+	T_cells_c4_CD8+_ZFP36	HER2+	no_gene_module	no_scTYPER_call	no_inferCNV_call	no_CNA_value
CID3586_GGAATAACAAAGAATC	CID3586	6.91563	2169	909	T-cells	T cells CD8+	T_cells_c4_CD8+_ZFP36	HER2+	no_gene_module	no_scTYPER_call	no_inferCNV_call	no_CNA_value
CID3586_GGACAAGGTTAGGGTG	CID3586	4.92458	2254	991	T-cells	T cells CD8+	T_cells_c4_CD8+_ZFP36	HER2+	no_gene_module	no_scTYPER_call	no_inferCNV_call	no_CNA_value
CID3586_GGACATTTCGGAGCAA	CID3586	7.1047	1872	847	T-cells	T cells CD8+	T_cells_c4_CD8+_ZFP36	HER2+	no_gene_module	no_scTYPER_call	no_inferCNV_call	no_CNA_value
CID3586_GGACGTCCACATAACC	CID3586	5.88685	2616	1168	T-cells	T cells CD8+	T_cells_c4_CD8+_ZFP36	HER2+	no_gene_module	no_scTYPER_call	no_inferCNV_call	no_CNA_value
CID3586_GGAGCAAGTTTCGCTC	CID3586	3.69748	1190	566	T-cells	T cells CD8+	T_cells_c4_CD8+_ZFP36	HER2+	no_gene_module	no_scTYPER_call	no_inferCNV_call	no_CNA_value
CID3586_GGAGCAATCCTATGTT	CID3586	3.05851	2256	942	T-cells	T cells CD8+	T_cells_c4_CD8+_ZFP36	HER2+	no_gene_module	no_scTYPER_call	no_inferCNV_call	no_CNA_value
CID3586_GGATGTTTCAGCGACC	CID3586	1.72101	2208	977	T-cells	T cells CD8+	T_cells_c4_CD8+_ZFP36	HER2+	no_gene_module	no_scTYPER_call	no_inferCNV_call	no_CNA_value
CID3586_GGATTACAGAATTGTG	CID3586	4.55954	2259	923	T-cells	T cells CD8+	T_cells_c4_CD8+_ZFP36	HER2+	no_gene_module	no_scTYPER_call	no_inferCNV_call	no_CNA_value
CID3586_GGCAATTAGCTGATAA	CID3586	6.72527	2275	1085	T-cells	T cells CD8+	T_cells_c4_CD8+_ZFP36	HER2+	no_gene_module	no_scTYPER_call	no_inferCNV_call	no_CNA_value
CID3586_GGCTGGTAGCACGCCT	CID3586	2.76976	1733	814	T-cells	T cells CD8+	T_cells_c4_CD8+_ZFP36	HER2+	no_gene_module	no_scTYPER_call	no_inferCNV_call	no_CNA_value
CID3586_GGCTGGTAGCCAGGAT	CID3586	5.91806	1318	629	T-cells	T cells CD8+	T_cells_c4_CD8+_ZFP36	HER2+	no_gene_module	no_scTYPER_call	no_inferCNV_call	no_CNA_value
CID3586_GGGAATGAGTGGGATC	CID3586	2.13428	2249	839	T-cells	T cells CD8+	T_cells_c4_CD8+_ZFP36	HER2+	no_gene_module	no_scTYPER_call	no_inferCNV_call	no_CNA_value
CID3586_GGGAATGGTGAAATCA	CID3586	5.85312	1811	742	T-cells	T cells CD8+	T_cells_c4_CD8+_ZFP36	HER2+	no_gene_module	no_scTYPER_call	no_inferCNV_call	no_CNA_value
CID3586_GGGAATGGTGTGCCTG	CID3586	4.65116	1892	717	T-cells	T cells CD8+	T_cells_c4_CD8+_ZFP36	HER2+	no_gene_module	no_scTYPER_call	no_inferCNV_call	no_CNA_value
CID3586_GGGAGATAGACAGAGA	CID3586	8.14132	1953	831	T-cells	T cells CD8+	T_cells_c4_CD8+_ZFP36	HER2+	no_gene_module	no_scTYPER_call	no_inferCNV_call	no_CNA_value
CID3586_GGGAGATGTGCCTGCA	CID3586	4.71881	3094	1293	T-cells	T cells CD8+	T_cells_c4_CD8+_ZFP36	HER2+	no_gene_module	no_scTYPER_call	no_inferCNV_call	no_CNA_value
CID3586_GGGATGAGTAAAGTCA	CID3586	3.87665	2270	807	T-cells	T cells CD8+	T_cells_c4_CD8+_ZFP36	HER2+	no_gene_module	no_scTYPER_call	no_inferCNV_call	no_CNA_value
CID3586_GGGCACTCATGCATGT	CID3586	3.31911	2109	803	T-cells	T cells CD8+	T_cells_c4_CD8+_ZFP36	HER2+	no_gene_module	no_scTYPER_call	no_inferCNV_call	no_CNA_value
CID3586_GGGTCTGTCTTCAACT	CID3586	3.7663	2071	878	T-cells	T cells CD8+	T_cells_c4_CD8+_ZFP36	HER2+	no_gene_module	no_scTYPER_call	no_inferCNV_call	no_CNA_value
CID3586_GGGTTGCCAGTGGGAT	CID3586	6.5534	2060	820	T-cells	T cells CD8+	T_cells_c4_CD8+_ZFP36	HER2+	no_gene_module	no_scTYPER_call	no_inferCNV_call	no_CNA_value
CID3586_GGTATTGTCCCTTGCA	CID3586	4.5977	1392	794	T-cells	T cells CD8+	T_cells_c4_CD8+_ZFP36	HER2+	no_gene_module	no_scTYPER_call	no_inferCNV_call	no_CNA_value
CID3586_GGTGAAGAGCAATATG	CID3586	6.26263	1980	781	T-cells	T cells CD8+	T_cells_c4_CD8+_ZFP36	HER2+	no_gene_module	no_scTYPER_call	no_inferCNV_call	no_CNA_value
CID3586_GGTGAAGTCAACACAC	CID3586	5.51456	2575	855	T-cells	T cells CD8+	T_cells_c4_CD8+_ZFP36	HER2+	no_gene_module	no_scTYPER_call	no_inferCNV_call	no_CNA_value
CID3586_GGTGCGTCAAAGGCGT	CID3586	3.78987	2665	936	T-cells	T cells CD8+	T_cells_c4_CD8+_ZFP36	HER2+	no_gene_module	no_scTYPER_call	no_inferCNV_call	no_CNA_value
CID3586_GGTGTTAAGTTGAGAT	CID3586	3.98333	2159	975	T-cells	T cells CD8+	T_cells_c4_CD8+_ZFP36	HER2+	no_gene_module	no_scTYPER_call	no_inferCNV_call	no_CNA_value
CID3586_GGTGTTATCCGTTGTC	CID3586	4.41252	1949	814	T-cells	T cells CD8+	T_cells_c4_CD8+_ZFP36	HER2+	no_gene_module	no_scTYPER_call	no_inferCNV_call	no_CNA_value
CID3586_GTAACGTAGCTATGCT	CID3586	5.34161	1610	667	T-cells	T cells CD8+	T_cells_c4_CD8+_ZFP36	HER2+	no_gene_module	no_scTYPER_call	no_inferCNV_call	no_CNA_value
CID3586_GTAACGTCATCAGTCA	CID3586	5.0738	1084	627	T-cells	T cells CD8+	T_cells_c4_CD8+_ZFP36	HER2+	no_gene_module	no_scTYPER_call	no_inferCNV_call	no_CNA_value
CID3586_GTAACGTTCATAACCG	CID3586	5.60538	1338	632	T-cells	T cells CD8+	T_cells_c4_CD8+_ZFP36	HER2+	no_gene_module	no_scTYPER_call	no_inferCNV_call	no_CNA_value
CID3586_GTACTCCGTCAGAGGT	CID3586	5.48571	1750	771	T-cells	T cells CD8+	T_cells_c4_CD8+_ZFP36	HER2+	no_gene_module	no_scTYPER_call	no_inferCNV_call	no_CNA_value
CID3586_GTACTTTCAAAGGAAG	CID3586	3.31155	2295	936	T-cells	T cells CD8+	T_cells_c4_CD8+_ZFP36	HER2+	no_gene_module	no_scTYPER_call	no_inferCNV_call	no_CNA_value
CID3586_GTAGGCCAGGCATGGT	CID3586	8.07292	1536	701	T-cells	T cells CD8+	T_cells_c4_CD8+_ZFP36	HER2+	no_gene_module	no_scTYPER_call	no_inferCNV_call	no_CNA_value
CID3586_GTAGTCACACCGTTGG	CID3586	4.29199	2959	1047	T-cells	T cells CD8+	T_cells_c4_CD8+_ZFP36	HER2+	no_gene_module	no_scTYPER_call	no_inferCNV_call	no_CNA_value
CID3586_GTAGTCAGTAGCGTAG	CID3586	5.91344	3974	1351	T-cells	T cells CD8+	T_cells_c4_CD8+_ZFP36	HER2+	no_gene_module	no_scTYPER_call	no_inferCNV_call	no_CNA_value
CID3586_GTATCTTGTCCAGTAT	CID3586	2.65896	2595	999	T-cells	T cells CD8+	T_cells_c4_CD8+_ZFP36	HER2+	no_gene_module	no_scTYPER_call	no_inferCNV_call	no_CNA_value
CID3586_GTATCTTGTTCCATGA	CID3586	6.72704	2319	820	T-cells	T cells CD8+	T_cells_c4_CD8+_ZFP36	HER2+	no_gene_module	no_scTYPER_call	no_inferCNV_call	no_CNA_value
CID3586_GTATCTTTCCTACAGA	CID3586	3.91426	2146	841	T-cells	T cells CD8+	T_cells_c4_CD8+_ZFP36	HER2+	no_gene_module	no_scTYPER_call	no_inferCNV_call	no_CNA_value
CID3586_GTATCTTTCCTGTACC	CID3586	4.41576	1472	614	T-cells	T cells CD8+	T_cells_c4_CD8+_ZFP36	HER2+	no_gene_module	no_scTYPER_call	no_inferCNV_call	no_CNA_value
CID3586_GTCAAGTAGAGGTAGA	CID3586	4.71642	1675	781	T-cells	T cells CD8+	T_cells_c4_CD8+_ZFP36	HER2+	no_gene_module	no_scTYPER_call	no_inferCNV_call	no_CNA_value
CID3586_GTCACAAAGAAGGTTT	CID3586	6.76908	2083	852	T-cells	T cells CD8+	T_cells_c4_CD8+_ZFP36	HER2+	no_gene_module	no_scTYPER_call	no_inferCNV_call	no_CNA_value
CID3586_GTCACGGTCATCGGAT	CID3586	4.41767	1992	848	T-cells	T cells CD8+	T_cells_c4_CD8+_ZFP36	HER2+	no_gene_module	no_scTYPER_call	no_inferCNV_call	no_CNA_value
CID3586_GTCCTCAGTAGTGAAT	CID3586	4.96559	2034	733	T-cells	T cells CD8+	T_cells_c4_CD8+_ZFP36	HER2+	no_gene_module	no_scTYPER_call	no_inferCNV_call	no_CNA_value
CID3586_GTCCTCAGTGTTGGGA	CID3586	4.81513	2326	875	T-cells	T cells CD8+	T_cells_c4_CD8+_ZFP36	HER2+	no_gene_module	no_scTYPER_call	no_inferCNV_call	no_CNA_value
CID3586_GTCGGGTGTGCCTGTG	CID3586	3.60825	1358	685	T-cells	T cells CD8+	T_cells_c4_CD8+_ZFP36	HER2+	no_gene_module	no_scTYPER_call	no_inferCNV_call	no_CNA_value
CID3586_GTCTCGTAGTGAAGTT	CID3586	3.64457	2881	1087	T-cells	T cells CD8+	T_cells_c4_CD8+_ZFP36	HER2+	no_gene_module	no_scTYPER_call	no_inferCNV_call	no_CNA_value
CID3586_GTGAAGGTCGGAGCAA	CID3586	4.34275	4283	1436	T-cells	T cells CD8+	T_cells_c4_CD8+_ZFP36	HER2+	no_gene_module	no_scTYPER_call	no_inferCNV_call	no_CNA_value
CID3586_GTGCAGCGTCCCGACA	CID3586	5.84551	1437	534	T-cells	T cells CD8+	T_cells_c4_CD8+_ZFP36	HER2+	no_gene_module	no_scTYPER_call	no_inferCNV_call	no_CNA_value
CID3586_GTGCATAAGTCGAGTG	CID3586	6.08259	1792	721	T-cells	T cells CD8+	T_cells_c4_CD8+_ZFP36	HER2+	no_gene_module	no_scTYPER_call	no_inferCNV_call	no_CNA_value
CID3586_GTGCTTCGTTGGTGGA	CID3586	1.3153	2661	1110	T-cells	T cells CD8+	T_cells_c4_CD8+_ZFP36	HER2+	no_gene_module	no_scTYPER_call	no_inferCNV_call	no_CNA_value
CID3586_GTGGGTCAGTGACTCT	CID3586	4.8	1750	812	T-cells	T cells CD8+	T_cells_c4_CD8+_ZFP36	HER2+	no_gene_module	no_scTYPER_call	no_inferCNV_call	no_CNA_value
CID3586_GTTAAGCCATCACGAT	CID3586	2.12305	2308	902	T-cells	T cells CD8+	T_cells_c4_CD8+_ZFP36	HER2+	no_gene_module	no_scTYPER_call	no_inferCNV_call	no_CNA_value
CID3586_GTTAAGCTCACGATGT	CID3586	3.78845	2666	945	T-cells	T cells CD8+	T_cells_c4_CD8+_ZFP36	HER2+	no_gene_module	no_scTYPER_call	no_inferCNV_call	no_CNA_value
CID3586_GTTAAGCTCCGTAGTA	CID3586	1.34357	2084	859	T-cells	T cells CD8+	T_cells_c4_CD8+_ZFP36	HER2+	no_gene_module	no_scTYPER_call	no_inferCNV_call	no_CNA_value
CID3586_GTTACAGGTCTCTTTA	CID3586	5.66826	1676	820	T-cells	T cells CD8+	T_cells_c4_CD8+_ZFP36	HER2+	no_gene_module	no_scTYPER_call	no_inferCNV_call	no_CNA_value
CID3586_GTTACAGGTGTAACGG	CID3586	4.27501	2269	999	T-cells	T cells CD8+	T_cells_c4_CD8+_ZFP36	HER2+	no_gene_module	no_scTYPER_call	no_inferCNV_call	no_CNA_value
CID3586_GTTCATTGTCTGCAAT	CID3586	4.5755	1967	935	T-cells	T cells CD8+	T_cells_c4_CD8+_ZFP36	HER2+	no_gene_module	no_scTYPER_call	no_inferCNV_call	no_CNA_value
CID3586_GTTCGGGAGGAGTCTG	CID3586	3.8961	1694	788	T-cells	T cells CD8+	T_cells_c4_CD8+_ZFP36	HER2+	no_gene_module	no_scTYPER_call	no_inferCNV_call	no_CNA_value
CID3586_GTTCGGGTCGCTGATA	CID3586	4.77193	1425	710	T-cells	T cells CD8+	T_cells_c4_CD8+_ZFP36	HER2+	no_gene_module	no_scTYPER_call	no_inferCNV_call	no_CNA_value
CID3586_GTTCTCGTCTGCTTGC	CID3586	2.62035	1641	714	T-cells	T cells CD8+	T_cells_c4_CD8+_ZFP36	HER2+	no_gene_module	no_scTYPER_call	no_inferCNV_call	no_CNA_value
CID3586_TAAACCGAGACTACAA	CID3586	3.70566	1889	862	T-cells	T cells CD8+	T_cells_c4_CD8+_ZFP36	HER2+	no_gene_module	no_scTYPER_call	no_inferCNV_call	no_CNA_value
CID3586_TAAACCGCATGGTCTA	CID3586	1.66667	2040	742	T-cells	T cells CD8+	T_cells_c4_CD8+_ZFP36	HER2+	no_gene_module	no_scTYPER_call	no_inferCNV_call	no_CNA_value
CID3586_TAAGAGAGTACCAGTT	CID3586	6.32911	3792	1465	T-cells	T cells CD8+	T_cells_c4_CD8+_ZFP36	HER2+	no_gene_module	no_scTYPER_call	no_inferCNV_call	no_CNA_value
CID3586_TAAGAGAGTGTATGGG	CID3586	5.23732	1833	851	T-cells	T cells CD8+	T_cells_c4_CD8+_ZFP36	HER2+	no_gene_module	no_scTYPER_call	no_inferCNV_call	no_CNA_value
CID3586_TAAGAGATCTATGTGG	CID3586	6.07867	1678	682	T-cells	T cells CD8+	T_cells_c4_CD8+_ZFP36	HER2+	no_gene_module	no_scTYPER_call	no_inferCNV_call	no_CNA_value
CID3586_TAAGCGTAGAACTCGG	CID3586	6.38474	1206	582	T-cells	T cells CD8+	T_cells_c4_CD8+_ZFP36	HER2+	no_gene_module	no_scTYPER_call	no_inferCNV_call	no_CNA_value
CID3586_TAAGCGTAGAGTACAT	CID3586	3.35821	1608	676	T-cells	T cells CD8+	T_cells_c4_CD8+_ZFP36	HER2+	no_gene_module	no_scTYPER_call	no_inferCNV_call	no_CNA_value
CID3586_TAAGCGTTCGGAGGTA	CID3586	4.32555	1757	752	T-cells	T cells CD8+	T_cells_c4_CD8+_ZFP36	HER2+	no_gene_module	no_scTYPER_call	no_inferCNV_call	no_CNA_value
CID3586_TACACGAGTCGGCACT	CID3586	5.8032	2378	794	T-cells	T cells CD8+	T_cells_c4_CD8+_ZFP36	HER2+	no_gene_module	no_scTYPER_call	no_inferCNV_call	no_CNA_value
CID3586_TACACGAGTCTAGAGG	CID3586	4.66613	2486	951	T-cells	T cells CD8+	T_cells_c4_CD8+_ZFP36	HER2+	no_gene_module	no_scTYPER_call	no_inferCNV_call	no_CNA_value
CID3586_TACAGTGCAAATACAG	CID3586	6.01422	1829	754	T-cells	T cells CD8+	T_cells_c4_CD8+_ZFP36	HER2+	no_gene_module	no_scTYPER_call	no_inferCNV_call	no_CNA_value
CID3586_TACCTATCAAGGTTCT	CID3586	3.54655	1579	865	T-cells	T cells CD8+	T_cells_c4_CD8+_ZFP36	HER2+	no_gene_module	no_scTYPER_call	no_inferCNV_call	no_CNA_value
CID3586_TACCTTAGTAGCTAAA	CID3586	3.13832	2581	1062	T-cells	T cells CD8+	T_cells_c4_CD8+_ZFP36	HER2+	no_gene_module	no_scTYPER_call	no_inferCNV_call	no_CNA_value
CID3586_TACGGATCACCTATCC	CID3586	1.75299	1255	650	T-cells	T cells CD8+	T_cells_c4_CD8+_ZFP36	HER2+	no_gene_module	no_scTYPER_call	no_inferCNV_call	no_CNA_value
CID3586_TACGGGCGTAAGCACG	CID3586	1.42529	2175	857	T-cells	T cells CD8+	T_cells_c4_CD8+_ZFP36	HER2+	no_gene_module	no_scTYPER_call	no_inferCNV_call	no_CNA_value
CID3586_TACGGGCTCGTGGTCG	CID3586	6.15854	1640	730	T-cells	T cells CD8+	T_cells_c4_CD8+_ZFP36	HER2+	no_gene_module	no_scTYPER_call	no_inferCNV_call	no_CNA_value
CID3586_TACGGTACACCCTATC	CID3586	4.56298	1556	642	T-cells	T cells CD8+	T_cells_c4_CD8+_ZFP36	HER2+	no_gene_module	no_scTYPER_call	no_inferCNV_call	no_CNA_value
CID3586_TACGGTAGTGGTACAG	CID3586	5.12214	2538	977	T-cells	T cells CD8+	T_cells_c4_CD8+_ZFP36	HER2+	no_gene_module	no_scTYPER_call	no_inferCNV_call	no_CNA_value
CID3586_TACGGTATCACATAGC	CID3586	6.13781	1727	776	T-cells	T cells CD8+	T_cells_c4_CD8+_ZFP36	HER2+	no_gene_module	no_scTYPER_call	no_inferCNV_call	no_CNA_value
CID3586_TACTCATGTATTAGCC	CID3586	4.97753	2893	918	T-cells	T cells CD8+	T_cells_c4_CD8+_ZFP36	HER2+	no_gene_module	no_scTYPER_call	no_inferCNV_call	no_CNA_value
CID3586_TACTCATTCTGCCAGG	CID3586	3.86003	2772	1158	T-cells	T cells CD8+	T_cells_c4_CD8+_ZFP36	HER2+	no_gene_module	no_scTYPER_call	no_inferCNV_call	no_CNA_value
CID3586_TACTCGCCAATCGGTT	CID3586	6.9828	1919	813	T-cells	T cells CD8+	T_cells_c4_CD8+_ZFP36	HER2+	no_gene_module	no_scTYPER_call	no_inferCNV_call	no_CNA_value
CID3586_TACTCGCTCCTGCAGG	CID3586	1.89261	2272	912	T-cells	T cells CD8+	T_cells_c4_CD8+_ZFP36	HER2+	no_gene_module	no_scTYPER_call	no_inferCNV_call	no_CNA_value
CID3586_TACTCGCTCGACGGAA	CID3586	4.68208	1730	731	T-cells	T cells CD8+	T_cells_c4_CD8+_ZFP36	HER2+	no_gene_module	no_scTYPER_call	no_inferCNV_call	no_CNA_value
CID3586_TACTTACGTCATCGGC	CID3586	3.28467	1644	712	T-cells	T cells CD8+	T_cells_c4_CD8+_ZFP36	HER2+	no_gene_module	no_scTYPER_call	no_inferCNV_call	no_CNA_value
CID3586_TACTTACGTCCGAGTC	CID3586	2.52101	1785	807	T-cells	T cells CD8+	T_cells_c4_CD8+_ZFP36	HER2+	no_gene_module	no_scTYPER_call	no_inferCNV_call	no_CNA_value
CID3586_TAGAGCTAGCGTAATA	CID3586	3.82546	3346	1280	T-cells	T cells CD8+	T_cells_c4_CD8+_ZFP36	HER2+	no_gene_module	no_scTYPER_call	no_inferCNV_call	no_CNA_value
CID3586_TAGAGCTAGGCTCAGA	CID3586	6.29252	1764	758	T-cells	T cells CD8+	T_cells_c4_CD8+_ZFP36	HER2+	no_gene_module	no_scTYPER_call	no_inferCNV_call	no_CNA_value
CID3586_TAGGCATAGACCGGAT	CID3586	5.37099	1806	826	T-cells	T cells CD8+	T_cells_c4_CD8+_ZFP36	HER2+	no_gene_module	no_scTYPER_call	no_inferCNV_call	no_CNA_value
CID3586_TAGGCATAGGTGATAT	CID3586	5.27262	1669	712	T-cells	T cells CD8+	T_cells_c4_CD8+_ZFP36	HER2+	no_gene_module	no_scTYPER_call	no_inferCNV_call	no_CNA_value
CID3586_TAGGCATCACGAGGTA	CID3586	3.25157	1753	732	T-cells	T cells CD8+	T_cells_c4_CD8+_ZFP36	HER2+	no_gene_module	no_scTYPER_call	no_inferCNV_call	no_CNA_value
CID3586_TAGTGGTTCTCGCTTG	CID3586	2.80374	2140	875	T-cells	T cells CD8+	T_cells_c4_CD8+_ZFP36	HER2+	no_gene_module	no_scTYPER_call	no_inferCNV_call	no_CNA_value
CID3586_TAGTTGGAGCCAGAAC	CID3586	6.64557	2212	904	T-cells	T cells CD8+	T_cells_c4_CD8+_ZFP36	HER2+	no_gene_module	no_scTYPER_call	no_inferCNV_call	no_CNA_value
CID3586_TAGTTGGGTGCTCTTC	CID3586	2.87409	2192	908	T-cells	T cells CD8+	T_cells_c4_CD8+_ZFP36	HER2+	no_gene_module	no_scTYPER_call	no_inferCNV_call	no_CNA_value
CID3586_TATCAGGCATTGAGCT	CID3586	4.2963	2700	976	T-cells	T cells CD8+	T_cells_c4_CD8+_ZFP36	HER2+	no_gene_module	no_scTYPER_call	no_inferCNV_call	no_CNA_value
CID3586_TATCAGGGTAGCGCAA	CID3586	6.40105	1531	698	T-cells	T cells CD8+	T_cells_c4_CD8+_ZFP36	HER2+	no_gene_module	no_scTYPER_call	no_inferCNV_call	no_CNA_value
CID3586_TATCAGGGTCTGCGGT	CID3586	5.14107	1595	702	T-cells	T cells CD8+	T_cells_c4_CD8+_ZFP36	HER2+	no_gene_module	no_scTYPER_call	no_inferCNV_call	no_CNA_value
CID3586_TATCTCACATTCTCAT	CID3586	3.59869	1834	718	T-cells	T cells CD8+	T_cells_c4_CD8+_ZFP36	HER2+	no_gene_module	no_scTYPER_call	no_inferCNV_call	no_CNA_value
CID3586_TATTACCAGCTAGCCC	CID3586	3.15457	1902	835	T-cells	T cells CD8+	T_cells_c4_CD8+_ZFP36	HER2+	no_gene_module	no_scTYPER_call	no_inferCNV_call	no_CNA_value
CID3586_TATTACCTCTAGAGTC	CID3586	2.74431	1494	720	T-cells	T cells CD8+	T_cells_c4_CD8+_ZFP36	HER2+	no_gene_module	no_scTYPER_call	no_inferCNV_call	no_CNA_value
CID3586_TCAACGAAGAAACGCC	CID3586	4.85143	1649	769	T-cells	T cells CD8+	T_cells_c4_CD8+_ZFP36	HER2+	no_gene_module	no_scTYPER_call	no_inferCNV_call	no_CNA_value
CID3586_TCAATCTCAGACACTT	CID3586	5.80475	1137	576	T-cells	T cells CD8+	T_cells_c4_CD8+_ZFP36	HER2+	no_gene_module	no_scTYPER_call	no_inferCNV_call	no_CNA_value
CID3586_TCAATCTGTGCGAAAC	CID3586	2.73723	2192	832	T-cells	T cells CD8+	T_cells_c4_CD8+_ZFP36	HER2+	no_gene_module	no_scTYPER_call	no_inferCNV_call	no_CNA_value
CID3586_TCAATCTTCTGGCGAC	CID3586	3.47349	2735	1043	T-cells	T cells CD8+	T_cells_c4_CD8+_ZFP36	HER2+	no_gene_module	no_scTYPER_call	no_inferCNV_call	no_CNA_value
CID3586_TCACAAGTCGTAGATC	CID3586	5.09849	1726	843	T-cells	T cells CD8+	T_cells_c4_CD8+_ZFP36	HER2+	no_gene_module	no_scTYPER_call	no_inferCNV_call	no_CNA_value
CID3586_TCAGATGGTTGGTAAA	CID3586	4.32496	1711	747	T-cells	T cells CD8+	T_cells_c4_CD8+_ZFP36	HER2+	no_gene_module	no_scTYPER_call	no_inferCNV_call	no_CNA_value
CID3586_TCAGCAAAGTTCGCGC	CID3586	5.04854	1030	509	T-cells	T cells CD8+	T_cells_c4_CD8+_ZFP36	HER2+	no_gene_module	no_scTYPER_call	no_inferCNV_call	no_CNA_value
CID3586_TCAGGATAGAAACCTA	CID3586	3.73789	2167	852	T-cells	T cells CD8+	T_cells_c4_CD8+_ZFP36	HER2+	no_gene_module	no_scTYPER_call	no_inferCNV_call	no_CNA_value
CID3586_TCAGGTACACCAGTTA	CID3586	4.79858	1688	872	T-cells	T cells CD8+	T_cells_c4_CD8+_ZFP36	HER2+	no_gene_module	no_scTYPER_call	no_inferCNV_call	no_CNA_value
CID3586_TCATTTGCACCACGTG	CID3586	2.9819	1878	766	T-cells	T cells CD8+	T_cells_c4_CD8+_ZFP36	HER2+	no_gene_module	no_scTYPER_call	no_inferCNV_call	no_CNA_value
CID3586_TCCACACAGCGTAATA	CID3586	5.37408	1898	908	T-cells	T cells CD8+	T_cells_c4_CD8+_ZFP36	HER2+	no_gene_module	no_scTYPER_call	no_inferCNV_call	no_CNA_value
CID3586_TCGAGGCGTTGAACTC	CID3586	3.86694	2405	990	T-cells	T cells CD8+	T_cells_c4_CD8+_ZFP36	HER2+	no_gene_module	no_scTYPER_call	no_inferCNV_call	no_CNA_value
CID3586_TCGTACCGTACAGACG	CID3586	5.07181	2228	846	T-cells	T cells CD8+	T_cells_c4_CD8+_ZFP36	HER2+	no_gene_module	no_scTYPER_call	no_inferCNV_call	no_CNA_value
CID3586_TCGTACCTCACAGTAC	CID3586	2.4262	2473	988	T-cells	T cells CD8+	T_cells_c4_CD8+_ZFP36	HER2+	no_gene_module	no_scTYPER_call	no_inferCNV_call	no_CNA_value
CID3586_TCTCATATCCACGCAG	CID3586	5.03145	1908	723	T-cells	T cells CD8+	T_cells_c4_CD8+_ZFP36	HER2+	no_gene_module	no_scTYPER_call	no_inferCNV_call	no_CNA_value
CID3586_TCTCTAAGTGCGCTTG	CID3586	3.36859	2553	959	T-cells	T cells CD8+	T_cells_c4_CD8+_ZFP36	HER2+	no_gene_module	no_scTYPER_call	no_inferCNV_call	no_CNA_value
CID3586_TCTGAGAAGCCGCCTA	CID3586	8.63422	1274	562	T-cells	T cells CD8+	T_cells_c4_CD8+_ZFP36	HER2+	no_gene_module	no_scTYPER_call	no_inferCNV_call	no_CNA_value
CID3586_TCTGGAAGTAGAAAGG	CID3586	5.49645	1692	718	T-cells	T cells CD8+	T_cells_c4_CD8+_ZFP36	HER2+	no_gene_module	no_scTYPER_call	no_inferCNV_call	no_CNA_value
CID3586_TGAAAGATCTTTACGT	CID3586	4.9291	1481	692	T-cells	T cells CD8+	T_cells_c4_CD8+_ZFP36	HER2+	no_gene_module	no_scTYPER_call	no_inferCNV_call	no_CNA_value
CID3586_TGACGGCTCGGTTCGG	CID3586	3.68063	3532	1332	T-cells	T cells CD8+	T_cells_c4_CD8+_ZFP36	HER2+	no_gene_module	no_scTYPER_call	no_inferCNV_call	no_CNA_value
CID3586_TGACTAGGTTAAAGAC	CID3586	5.86177	2286	873	T-cells	T cells CD8+	T_cells_c4_CD8+_ZFP36	HER2+	no_gene_module	no_scTYPER_call	no_inferCNV_call	no_CNA_value
CID3586_TGACTAGTCACCGTAA	CID3586	4.56503	2322	875	T-cells	T cells CD8+	T_cells_c4_CD8+_ZFP36	HER2+	no_gene_module	no_scTYPER_call	no_inferCNV_call	no_CNA_value
CID3586_TGACTTTTCATCGGAT	CID3586	2.41896	2067	974	T-cells	T cells CD8+	T_cells_c4_CD8+_ZFP36	HER2+	no_gene_module	no_scTYPER_call	no_inferCNV_call	no_CNA_value
CID3586_TGAGCCGAGAGGTACC	CID3586	2.84335	1864	719	T-cells	T cells CD8+	T_cells_c4_CD8+_ZFP36	HER2+	no_gene_module	no_scTYPER_call	no_inferCNV_call	no_CNA_value
CID3586_TGATTTCGTTACGACT	CID3586	5.18839	1619	731	T-cells	T cells CD8+	T_cells_c4_CD8+_ZFP36	HER2+	no_gene_module	no_scTYPER_call	no_inferCNV_call	no_CNA_value
CID3586_TGCACCTGTGAGTGAC	CID3586	4.28526	3127	1014	T-cells	T cells CD8+	T_cells_c4_CD8+_ZFP36	HER2+	no_gene_module	no_scTYPER_call	no_inferCNV_call	no_CNA_value
CID3586_TGCCAAAAGCGGCTTC	CID3586	5.25402	2303	886	T-cells	T cells CD8+	T_cells_c4_CD8+_ZFP36	HER2+	no_gene_module	no_scTYPER_call	no_inferCNV_call	no_CNA_value
CID3586_TGCCCATGTCTGGTCG	CID3586	4.9635	2055	951	T-cells	T cells CD8+	T_cells_c4_CD8+_ZFP36	HER2+	no_gene_module	no_scTYPER_call	no_inferCNV_call	no_CNA_value
CID3586_TGCCCATGTTTGTGTG	CID3586	3.36081	1577	638	T-cells	T cells CD8+	T_cells_c4_CD8+_ZFP36	HER2+	no_gene_module	no_scTYPER_call	no_inferCNV_call	no_CNA_value
CID3586_TGCCCTAAGCCCTAAT	CID3586	6.39769	1735	783	T-cells	T cells CD8+	T_cells_c4_CD8+_ZFP36	HER2+	no_gene_module	no_scTYPER_call	no_inferCNV_call	no_CNA_value
CID3586_TGCCCTAAGTGGTAAT	CID3586	3.78486	1004	556	T-cells	T cells CD8+	T_cells_c4_CD8+_ZFP36	HER2+	no_gene_module	no_scTYPER_call	no_inferCNV_call	no_CNA_value
CID3586_TGCCCTAGTATGAAAC	CID3586	4.32203	1180	572	T-cells	T cells CD8+	T_cells_c4_CD8+_ZFP36	HER2+	no_gene_module	no_scTYPER_call	no_inferCNV_call	no_CNA_value
CID3586_TGCCCTATCAATACCG	CID3586	4.04355	1929	919	T-cells	T cells CD8+	T_cells_c4_CD8+_ZFP36	HER2+	no_gene_module	no_scTYPER_call	no_inferCNV_call	no_CNA_value
CID3586_TGCGCAGTCTGCTGTC	CID3586	3.02637	2313	990	T-cells	T cells CD8+	T_cells_c4_CD8+_ZFP36	HER2+	no_gene_module	no_scTYPER_call	no_inferCNV_call	no_CNA_value
CID3586_TGCGTGGGTCCGACGT	CID3586	8.74263	1018	501	T-cells	T cells CD8+	T_cells_c4_CD8+_ZFP36	HER2+	no_gene_module	no_scTYPER_call	no_inferCNV_call	no_CNA_value
CID3586_TGCTGCTGTGTTTGTG	CID3586	6.68397	1541	675	T-cells	T cells CD8+	T_cells_c4_CD8+_ZFP36	HER2+	no_gene_module	no_scTYPER_call	no_inferCNV_call	no_CNA_value
CID3586_TGGACGCTCGCCCTTA	CID3586	5.86865	2147	789	T-cells	T cells CD8+	T_cells_c4_CD8+_ZFP36	HER2+	no_gene_module	no_scTYPER_call	no_inferCNV_call	no_CNA_value
CID3586_TGGCCAGGTCGCATCG	CID3586	3.08046	2175	947	T-cells	T cells CD8+	T_cells_c4_CD8+_ZFP36	HER2+	no_gene_module	no_scTYPER_call	no_inferCNV_call	no_CNA_value
CID3586_TGGCCAGTCATTGCCC	CID3586	3.42764	1838	783	T-cells	T cells CD8+	T_cells_c4_CD8+_ZFP36	HER2+	no_gene_module	no_scTYPER_call	no_inferCNV_call	no_CNA_value
CID3586_TGGCGCAAGAAGGCCT	CID3586	4.97778	1125	531	T-cells	T cells CD8+	T_cells_c4_CD8+_ZFP36	HER2+	no_gene_module	no_scTYPER_call	no_inferCNV_call	no_CNA_value
CID3586_TGGCGCAAGCCCTAAT	CID3586	7.09914	1634	836	T-cells	T cells CD8+	T_cells_c4_CD8+_ZFP36	HER2+	no_gene_module	no_scTYPER_call	no_inferCNV_call	no_CNA_value
CID3586_TGGGCGTAGACAGAGA	CID3586	4.40186	1931	812	T-cells	T cells CD8+	T_cells_c4_CD8+_ZFP36	HER2+	no_gene_module	no_scTYPER_call	no_inferCNV_call	no_CNA_value
CID3586_TGGTTCCAGAGACTAT	CID3586	2.94776	5360	1530	T-cells	T cells CD8+	T_cells_c4_CD8+_ZFP36	HER2+	no_gene_module	no_scTYPER_call	no_inferCNV_call	no_CNA_value
CID3586_TGGTTCCGTCCGAACC	CID3586	3.96804	3629	1079	T-cells	T cells CD8+	T_cells_c4_CD8+_ZFP36	HER2+	no_gene_module	no_scTYPER_call	no_inferCNV_call	no_CNA_value
CID3586_TGTATTCAGACCTTTG	CID3586	4.83015	1884	869	T-cells	T cells CD8+	T_cells_c4_CD8+_ZFP36	HER2+	no_gene_module	no_scTYPER_call	no_inferCNV_call	no_CNA_value
CID3586_TGTATTCAGTTTCCTT	CID3586	3.67789	2583	994	T-cells	T cells CD8+	T_cells_c4_CD8+_ZFP36	HER2+	no_gene_module	no_scTYPER_call	no_inferCNV_call	no_CNA_value
CID3586_TGTCCCACACTAAGTC	CID3586	4.41989	1448	653	T-cells	T cells CD8+	T_cells_c4_CD8+_ZFP36	HER2+	no_gene_module	no_scTYPER_call	no_inferCNV_call	no_CNA_value
CID3586_TGTCCCAGTCGACTAT	CID3586	3.59788	1890	828	T-cells	T cells CD8+	T_cells_c4_CD8+_ZFP36	HER2+	no_gene_module	no_scTYPER_call	no_inferCNV_call	no_CNA_value
CID3586_TGTGGTAAGTCTCAAC	CID3586	4.55026	1890	795	T-cells	T cells CD8+	T_cells_c4_CD8+_ZFP36	HER2+	no_gene_module	no_scTYPER_call	no_inferCNV_call	no_CNA_value
CID3586_TGTGGTATCCGCAGTG	CID3586	5.96405	1224	630	T-cells	T cells CD8+	T_cells_c4_CD8+_ZFP36	HER2+	no_gene_module	no_scTYPER_call	no_inferCNV_call	no_CNA_value
CID3586_TGTGTTTAGTGGACGT	CID3586	4.44006	2027	858	T-cells	T cells CD8+	T_cells_c4_CD8+_ZFP36	HER2+	no_gene_module	no_scTYPER_call	no_inferCNV_call	no_CNA_value
CID3586_TGTGTTTTCCTGCCAT	CID3586	5.44258	3344	1239	T-cells	T cells CD8+	T_cells_c4_CD8+_ZFP36	HER2+	no_gene_module	no_scTYPER_call	no_inferCNV_call	no_CNA_value
CID3586_TTAACTCCAATGAATG	CID3586	6.43529	1383	646	T-cells	T cells CD8+	T_cells_c4_CD8+_ZFP36	HER2+	no_gene_module	no_scTYPER_call	no_inferCNV_call	no_CNA_value
CID3586_TTAACTCCAGATCGGA	CID3586	2.68886	1562	683	T-cells	T cells CD8+	T_cells_c4_CD8+_ZFP36	HER2+	no_gene_module	no_scTYPER_call	no_inferCNV_call	no_CNA_value
CID3586_TTAGGACGTGCATCTA	CID3586	3.42499	2073	812	T-cells	T cells CD8+	T_cells_c4_CD8+_ZFP36	HER2+	no_gene_module	no_scTYPER_call	no_inferCNV_call	no_CNA_value
CID3586_TTCGAAGGTCCGAAGA	CID3586	5.51847	2247	845	T-cells	T cells CD8+	T_cells_c4_CD8+_ZFP36	HER2+	no_gene_module	no_scTYPER_call	no_inferCNV_call	no_CNA_value
CID3586_TTCTACACATGAACCT	CID3586	1.78174	1796	830	T-cells	T cells CD8+	T_cells_c4_CD8+_ZFP36	HER2+	no_gene_module	no_scTYPER_call	no_inferCNV_call	no_CNA_value
CID3586_TTCTCAAGTCAAAGCG	CID3586	3.06396	2611	1259	T-cells	T cells CD8+	T_cells_c4_CD8+_ZFP36	HER2+	no_gene_module	no_scTYPER_call	no_inferCNV_call	no_CNA_value
CID3586_TTCTCAATCTGCCAGG	CID3586	3.71058	2156	1005	T-cells	T cells CD8+	T_cells_c4_CD8+_ZFP36	HER2+	no_gene_module	no_scTYPER_call	no_inferCNV_call	no_CNA_value
CID3586_TTCTCCTAGCGTTGCC	CID3586	3.13514	2775	1006	T-cells	T cells CD8+	T_cells_c4_CD8+_ZFP36	HER2+	no_gene_module	no_scTYPER_call	no_inferCNV_call	no_CNA_value
CID3586_TTCTCCTCACAAGACG	CID3586	3.41071	2111	926	T-cells	T cells CD8+	T_cells_c4_CD8+_ZFP36	HER2+	no_gene_module	no_scTYPER_call	no_inferCNV_call	no_CNA_value
CID3586_TTCTCCTGTCTCTTTA	CID3586	4.74593	2086	884	T-cells	T cells CD8+	T_cells_c4_CD8+_ZFP36	HER2+	no_gene_module	no_scTYPER_call	no_inferCNV_call	no_CNA_value
CID3586_TTCTCCTTCCCTTGTG	CID3586	3.53337	1783	910	T-cells	T cells CD8+	T_cells_c4_CD8+_ZFP36	HER2+	no_gene_module	no_scTYPER_call	no_inferCNV_call	no_CNA_value
CID3586_TTCTTAGAGAGTTGGC	CID3586	4.31347	6074	1775	T-cells	T cells CD8+	T_cells_c4_CD8+_ZFP36	HER2+	no_gene_module	no_scTYPER_call	no_inferCNV_call	no_CNA_value
CID3586_TTCTTAGTCTTGCCGT	CID3586	2.68336	1677	792	T-cells	T cells CD8+	T_cells_c4_CD8+_ZFP36	HER2+	no_gene_module	no_scTYPER_call	no_inferCNV_call	no_CNA_value
CID3586_TTGACTTAGCCGCCTA	CID3586	4.17001	1247	554	T-cells	T cells CD8+	T_cells_c4_CD8+_ZFP36	HER2+	no_gene_module	no_scTYPER_call	no_inferCNV_call	no_CNA_value
CID3586_TTGACTTTCATTATCC	CID3586	2.08582	1678	818	T-cells	T cells CD8+	T_cells_c4_CD8+_ZFP36	HER2+	no_gene_module	no_scTYPER_call	no_inferCNV_call	no_CNA_value
CID3586_TTGCGTCCATCGATGT	CID3586	4.52128	5264	1556	T-cells	T cells CD8+	T_cells_c4_CD8+_ZFP36	HER2+	no_gene_module	no_scTYPER_call	no_inferCNV_call	no_CNA_value
CID3586_TTGGAACAGATACACA	CID3586	5.1638	1801	840	T-cells	T cells CD8+	T_cells_c4_CD8+_ZFP36	HER2+	no_gene_module	no_scTYPER_call	no_inferCNV_call	no_CNA_value
CID3586_TTGTAGGCAGCATGAG	CID3586	6.13181	1745	803	T-cells	T cells CD8+	T_cells_c4_CD8+_ZFP36	HER2+	no_gene_module	no_scTYPER_call	no_inferCNV_call	no_CNA_value
CID3586_TTGTAGGGTTGGAGGT	CID3586	3.66214	1693	759	T-cells	T cells CD8+	T_cells_c4_CD8+_ZFP36	HER2+	no_gene_module	no_scTYPER_call	no_inferCNV_call	no_CNA_value
CID3586_TTTACTGAGCTTATCG	CID3586	3.39138	2182	827	T-cells	T cells CD8+	T_cells_c4_CD8+_ZFP36	HER2+	no_gene_module	no_scTYPER_call	no_inferCNV_call	no_CNA_value
CID3586_TTTATGCAGCGGCTTC	CID3586	3.05002	2459	959	T-cells	T cells CD8+	T_cells_c4_CD8+_ZFP36	HER2+	no_gene_module	no_scTYPER_call	no_inferCNV_call	no_CNA_value
CID3586_TTTATGCTCTGTCTAT	CID3586	5.47818	2154	776	T-cells	T cells CD8+	T_cells_c4_CD8+_ZFP36	HER2+	no_gene_module	no_scTYPER_call	no_inferCNV_call	no_CNA_value
CID3586_TTTGCGCAGTCCCACG	CID3586	4.95609	1594	719	T-cells	T cells CD8+	T_cells_c4_CD8+_ZFP36	HER2+	no_gene_module	no_scTYPER_call	no_inferCNV_call	no_CNA_value
CID3586_TTTGCGCGTATAAACG	CID3586	4.43609	1330	635	T-cells	T cells CD8+	T_cells_c4_CD8+_ZFP36	HER2+	no_gene_module	no_scTYPER_call	no_inferCNV_call	no_CNA_value
CID3586_TTTGCGCTCTTGAGAC	CID3586	3.52707	2013	846	T-cells	T cells CD8+	T_cells_c4_CD8+_ZFP36	HER2+	no_gene_module	no_scTYPER_call	no_inferCNV_call	no_CNA_value
CID3586_TTTGTCAAGTCTCCTC	CID3586	4.97288	2212	985	T-cells	T cells CD8+	T_cells_c4_CD8+_ZFP36	HER2+	no_gene_module	no_scTYPER_call	no_inferCNV_call	no_CNA_value
CID3586_AAACCTGAGAGTAATC	CID3586	4.00136	2949	968	T-cells	T cells CD8+	T_cells_c4_CD8+_ZFP36	HER2+	no_gene_module	no_scTYPER_call	no_inferCNV_call	no_CNA_value
CID3586_ACGAGGAGTGTGGTTT	CID3586	3.00885	1130	542	T-cells	T cells CD8+	T_cells_c4_CD8+_ZFP36	HER2+	no_gene_module	no_scTYPER_call	no_inferCNV_call	no_CNA_value
CID3586_CCACCTAGTGTGACCC	CID3586	6.18367	4900	1512	T-cells	T cells CD8+	T_cells_c4_CD8+_ZFP36	HER2+	no_gene_module	no_scTYPER_call	no_inferCNV_call	no_CNA_value
CID3586_CCGTGGATCTCGCATC	CID3586	4.90534	4648	1490	T-cells	T cells CD8+	T_cells_c4_CD8+_ZFP36	HER2+	no_gene_module	no_scTYPER_call	no_inferCNV_call	no_CNA_value
CID3586_CGAGAAGGTACGCACC	CID3586	2.8086	2884	1065	T-cells	T cells CD8+	T_cells_c4_CD8+_ZFP36	HER2+	no_gene_module	no_scTYPER_call	no_inferCNV_call	no_CNA_value
CID3586_CTCACACCATGTCGAT	CID3586	5.10054	2039	862	T-cells	T cells CD8+	T_cells_c4_CD8+_ZFP36	HER2+	no_gene_module	no_scTYPER_call	no_inferCNV_call	no_CNA_value
CID3586_GAACATCTCAGTTAGC	CID3586	4.16887	1895	877	T-cells	T cells CD8+	T_cells_c4_CD8+_ZFP36	HER2+	no_gene_module	no_scTYPER_call	no_inferCNV_call	no_CNA_value
CID3586_GACACGCAGCTAGTCT	CID3586	3.05011	1836	817	T-cells	T cells CD8+	T_cells_c4_CD8+_ZFP36	HER2+	no_gene_module	no_scTYPER_call	no_inferCNV_call	no_CNA_value
CID3586_GCGGGTTGTTAAGAAC	CID3586	4.18483	2294	847	T-cells	T cells CD8+	T_cells_c4_CD8+_ZFP36	HER2+	no_gene_module	no_scTYPER_call	no_inferCNV_call	no_CNA_value
CID3586_GCTGCTTGTTCGTTGA	CID3586	1.88849	1112	647	T-cells	T cells CD8+	T_cells_c4_CD8+_ZFP36	HER2+	no_gene_module	no_scTYPER_call	no_inferCNV_call	no_CNA_value
CID3586_GTGCAGCTCTCGTTTA	CID3586	4.52509	2232	859	T-cells	T cells CD8+	T_cells_c4_CD8+_ZFP36	HER2+	no_gene_module	no_scTYPER_call	no_inferCNV_call	no_CNA_value
CID3586_TACACGACAATGACCT	CID3586	3.52304	1107	595	T-cells	T cells CD8+	T_cells_c4_CD8+_ZFP36	HER2+	no_gene_module	no_scTYPER_call	no_inferCNV_call	no_CNA_value
CID3586_TGTCCCACACGAAATA	CID3586	5.17726	5698	1692	T-cells	T cells CD8+	T_cells_c4_CD8+_ZFP36	HER2+	no_gene_module	no_scTYPER_call	no_inferCNV_call	no_CNA_value
CID3586_AAGACCTGTAGATTAG	CID3586	2.82108	2694	946	T-cells	T cells CD8+	T_cells_c4_CD8+_ZFP36	HER2+	no_gene_module	no_scTYPER_call	no_inferCNV_call	no_CNA_value
CID3586_ACATGGTGTTCTGGTA	CID3586	3.30124	1454	635	T-cells	T cells CD8+	T_cells_c4_CD8+_ZFP36	HER2+	no_gene_module	no_scTYPER_call	no_inferCNV_call	no_CNA_value
CID3586_ACGGAGATCTGCAGTA	CID3586	4.66667	1650	723	T-cells	T cells CD8+	T_cells_c4_CD8+_ZFP36	HER2+	no_gene_module	no_scTYPER_call	no_inferCNV_call	no_CNA_value
CID3586_ACTTTCATCGCTTAGA	CID3586	4.52712	2231	966	T-cells	T cells CD8+	T_cells_c4_CD8+_ZFP36	HER2+	no_gene_module	no_scTYPER_call	no_inferCNV_call	no_CNA_value
CID3586_CACAGGCGTCTCACCT	CID3586	3.27869	1220	617	T-cells	T cells CD8+	T_cells_c4_CD8+_ZFP36	HER2+	no_gene_module	no_scTYPER_call	no_inferCNV_call	no_CNA_value
CID3586_CCACCTAAGTGCGATG	CID3586	3.9047	1511	622	T-cells	T cells CD8+	T_cells_c4_CD8+_ZFP36	HER2+	no_gene_module	no_scTYPER_call	no_inferCNV_call	no_CNA_value
CID3586_CCATGTCAGTTGTAGA	CID3586	3.38889	1800	697	T-cells	T cells CD8+	T_cells_c4_CD8+_ZFP36	HER2+	no_gene_module	no_scTYPER_call	no_inferCNV_call	no_CNA_value
CID3586_CCCATACCAAACTGCT	CID3586	6.11951	1389	648	T-cells	T cells CD8+	T_cells_c4_CD8+_ZFP36	HER2+	no_gene_module	no_scTYPER_call	no_inferCNV_call	no_CNA_value
CID3586_CGTCACTCATACAGCT	CID3586	2.38764	712	442	T-cells	T cells CD8+	T_cells_c4_CD8+_ZFP36	HER2+	no_gene_module	no_scTYPER_call	no_inferCNV_call	no_CNA_value
CID3586_CTCAGAAAGTTAACGA	CID3586	5.88235	1360	602	T-cells	T cells CD8+	T_cells_c4_CD8+_ZFP36	HER2+	no_gene_module	no_scTYPER_call	no_inferCNV_call	no_CNA_value
CID3586_GATCGATTCACTTCAT	CID3586	4.12254	2644	1052	T-cells	T cells CD8+	T_cells_c4_CD8+_ZFP36	HER2+	no_gene_module	no_scTYPER_call	no_inferCNV_call	no_CNA_value
CID3586_GCTTCCACACATGGGA	CID3586	2.27475	2242	925	T-cells	T cells CD8+	T_cells_c4_CD8+_ZFP36	HER2+	no_gene_module	no_scTYPER_call	no_inferCNV_call	no_CNA_value
CID3586_GGCAATTGTGCCTGGT	CID3586	1.19048	2604	940	T-cells	T cells CD8+	T_cells_c4_CD8+_ZFP36	HER2+	no_gene_module	no_scTYPER_call	no_inferCNV_call	no_CNA_value
CID3586_GTACTTTAGAAACCAT	CID3586	3.2345	2968	1127	T-cells	T cells CD8+	T_cells_c4_CD8+_ZFP36	HER2+	no_gene_module	no_scTYPER_call	no_inferCNV_call	no_CNA_value
CID3586_GTGCAGCTCATGTCTT	CID3586	9.46746	2028	830	T-cells	T cells CD8+	T_cells_c4_CD8+_ZFP36	HER2+	no_gene_module	no_scTYPER_call	no_inferCNV_call	no_CNA_value
CID3586_GTTCGGGTCTACTATC	CID3586	1.34529	1115	545	T-cells	T cells CD8+	T_cells_c4_CD8+_ZFP36	HER2+	no_gene_module	no_scTYPER_call	no_inferCNV_call	no_CNA_value
CID3586_TACGGATAGTCTCGGC	CID3586	4.04355	1286	580	T-cells	T cells CD8+	T_cells_c4_CD8+_ZFP36	HER2+	no_gene_module	no_scTYPER_call	no_inferCNV_call	no_CNA_value
CID3586_TAGTGGTCAGTCAGCC	CID3586	3.78338	1348	639	T-cells	T cells CD8+	T_cells_c4_CD8+_ZFP36	HER2+	no_gene_module	no_scTYPER_call	no_inferCNV_call	no_CNA_value
CID3586_TCACGAAAGAGGGATA	CID3586	3.52035	1818	732	T-cells	T cells CD8+	T_cells_c4_CD8+_ZFP36	HER2+	no_gene_module	no_scTYPER_call	no_inferCNV_call	no_CNA_value
CID3586_TGCGTGGTCACGGTTA	CID3586	1.95172	1947	682	T-cells	T cells CD8+	T_cells_c4_CD8+_ZFP36	HER2+	no_gene_module	no_scTYPER_call	no_inferCNV_call	no_CNA_value
CID3586_TGGCGCATCACGACTA	CID3586	5.19481	1540	694	T-cells	T cells CD8+	T_cells_c4_CD8+_ZFP36	HER2+	no_gene_module	no_scTYPER_call	no_inferCNV_call	no_CNA_value
CID3586_TGGGCGTAGCTGAAAT	CID3586	1.21556	2468	915	T-cells	T cells CD8+	T_cells_c4_CD8+_ZFP36	HER2+	no_gene_module	no_scTYPER_call	no_inferCNV_call	no_CNA_value
CID3586_TTGAACGAGTGTGAAT	CID3586	11.4286	1225	564	T-cells	T cells CD8+	T_cells_c4_CD8+_ZFP36	HER2+	no_gene_module	no_scTYPER_call	no_inferCNV_call	no_CNA_value
CID3586_AACCGCGCATGCTAGT	CID3586	3.1746	1071	561	T-cells	T cells CD8+	T_cells_c4_CD8+_ZFP36	HER2+	no_gene_module	no_scTYPER_call	no_inferCNV_call	no_CNA_value
CID3586_AACTTTCTCTCTAGGA	CID3586	3.43214	1282	586	T-cells	T cells CD8+	T_cells_c4_CD8+_ZFP36	HER2+	no_gene_module	no_scTYPER_call	no_inferCNV_call	no_CNA_value
CID3586_ACAGCTAAGCCACTAT	CID3586	6.86324	1967	903	T-cells	T cells CD8+	T_cells_c4_CD8+_ZFP36	HER2+	no_gene_module	no_scTYPER_call	no_inferCNV_call	no_CNA_value
CID3586_CAAGTTGCAGCTGCAC	CID3586	7.09521	1649	728	T-cells	T cells CD8+	T_cells_c4_CD8+_ZFP36	HER2+	no_gene_module	no_scTYPER_call	no_inferCNV_call	no_CNA_value
CID3586_CACAAACAGAGACTTA	CID3586	5.06329	1343	624	T-cells	T cells CD8+	T_cells_c4_CD8+_ZFP36	HER2+	no_gene_module	no_scTYPER_call	no_inferCNV_call	no_CNA_value
CID3586_CCTTCCCCACCCATGG	CID3586	5.0789	2028	673	T-cells	T cells CD8+	T_cells_c4_CD8+_ZFP36	HER2+	no_gene_module	no_scTYPER_call	no_inferCNV_call	no_CNA_value
CID3586_CGGTTAATCAAAGTAG	CID3586	4.39367	569	334	T-cells	T cells CD8+	T_cells_c4_CD8+_ZFP36	HER2+	no_gene_module	no_scTYPER_call	no_inferCNV_call	no_CNA_value
CID3586_CTCACACAGCGTGTCC	CID3586	3.083	1265	610	T-cells	T cells CD8+	T_cells_c4_CD8+_ZFP36	HER2+	no_gene_module	no_scTYPER_call	no_inferCNV_call	no_CNA_value
CID3586_CTCCTAGTCACTATTC	CID3586	1.20788	1573	774	T-cells	T cells CD8+	T_cells_c4_CD8+_ZFP36	HER2+	no_gene_module	no_scTYPER_call	no_inferCNV_call	no_CNA_value
CID3586_GACGCGTTCCGTTGCT	CID3586	2.01666	2281	843	T-cells	T cells CD8+	T_cells_c4_CD8+_ZFP36	HER2+	no_gene_module	no_scTYPER_call	no_inferCNV_call	no_CNA_value
CID3586_GATGAGGCAACACCTA	CID3586	2.12766	1363	583	T-cells	T cells CD8+	T_cells_c4_CD8+_ZFP36	HER2+	no_gene_module	no_scTYPER_call	no_inferCNV_call	no_CNA_value
CID3586_GATTCAGCACGTCAGC	CID3586	5.00976	1537	677	T-cells	T cells CD8+	T_cells_c4_CD8+_ZFP36	HER2+	no_gene_module	no_scTYPER_call	no_inferCNV_call	no_CNA_value
CID3586_GCACTCTTCGTCACGG	CID3586	7.60563	1775	838	T-cells	T cells CD8+	T_cells_c4_CD8+_ZFP36	HER2+	no_gene_module	no_scTYPER_call	no_inferCNV_call	no_CNA_value
CID3586_GCTGCAGTCCGAACGC	CID3586	2.08754	1485	656	T-cells	T cells CD8+	T_cells_c4_CD8+_ZFP36	HER2+	no_gene_module	no_scTYPER_call	no_inferCNV_call	no_CNA_value
CID3586_GGAACTTAGCGTTGCC	CID3586	2.31818	2200	880	T-cells	T cells CD8+	T_cells_c4_CD8+_ZFP36	HER2+	no_gene_module	no_scTYPER_call	no_inferCNV_call	no_CNA_value
CID3586_GGCAATTCACAGGCCT	CID3586	2.84793	1861	893	T-cells	T cells CD8+	T_cells_c4_CD8+_ZFP36	HER2+	no_gene_module	no_scTYPER_call	no_inferCNV_call	no_CNA_value
CID3586_GGCGTGTGTATTCTCT	CID3586	5.54254	1281	647	T-cells	T cells CD8+	T_cells_c4_CD8+_ZFP36	HER2+	no_gene_module	no_scTYPER_call	no_inferCNV_call	no_CNA_value
CID3586_TACTTACAGCTAGCCC	CID3586	4.09639	1660	633	T-cells	T cells CD8+	T_cells_c4_CD8+_ZFP36	HER2+	no_gene_module	no_scTYPER_call	no_inferCNV_call	no_CNA_value
CID3586_TTCGGTCTCCGCGCAA	CID3586	1.68011	1488	640	T-cells	T cells CD8+	T_cells_c4_CD8+_ZFP36	HER2+	no_gene_module	no_scTYPER_call	no_inferCNV_call	no_CNA_value
CID3586_TTCTCAAGTAGCGCAA	CID3586	4.90196	1632	708	T-cells	T cells CD8+	T_cells_c4_CD8+_ZFP36	HER2+	no_gene_module	no_scTYPER_call	no_inferCNV_call	no_CNA_value
CID3586_TTTATGCAGGGTATCG	CID3586	5.8634	1552	768	T-cells	T cells CD8+	T_cells_c4_CD8+_ZFP36	HER2+	no_gene_module	no_scTYPER_call	no_inferCNV_call	no_CNA_value
CID3586_TTTCCTCCATCACGAT	CID3586	4.15606	1179	547	T-cells	T cells CD8+	T_cells_c4_CD8+_ZFP36	HER2+	no_gene_module	no_scTYPER_call	no_inferCNV_call	no_CNA_value
CID3586_ACACCGGAGTAGTGCG	CID3586	10.1652	787	416	T-cells	T cells CD8+	T_cells_c4_CD8+_ZFP36	HER2+	no_gene_module	no_scTYPER_call	no_inferCNV_call	no_CNA_value
CID3586_ACAGCTAAGCTATGCT	CID3586	3.00778	2826	891	T-cells	T cells CD8+	T_cells_c4_CD8+_ZFP36	HER2+	no_gene_module	no_scTYPER_call	no_inferCNV_call	no_CNA_value
CID3586_ACGGAGAGTGCGCTTG	CID3586	3.45953	1532	731	T-cells	T cells CD8+	T_cells_c4_CD8+_ZFP36	HER2+	no_gene_module	no_scTYPER_call	no_inferCNV_call	no_CNA_value
CID3586_ACTTGTTTCCTCAATT	CID3586	4.87805	1845	748	T-cells	T cells CD8+	T_cells_c4_CD8+_ZFP36	HER2+	no_gene_module	no_scTYPER_call	no_inferCNV_call	no_CNA_value
CID3586_AGATTGCCACGACTCG	CID3586	9.0625	960	500	T-cells	T cells CD8+	T_cells_c4_CD8+_ZFP36	HER2+	no_gene_module	no_scTYPER_call	no_inferCNV_call	no_CNA_value
CID3586_AGTGGGACATCTATGG	CID3586	4.56123	2017	814	T-cells	T cells CD8+	T_cells_c4_CD8+_ZFP36	HER2+	no_gene_module	no_scTYPER_call	no_inferCNV_call	no_CNA_value
CID3586_CAGAATCGTCCGTTAA	CID3586	2.27992	1579	636	T-cells	T cells CD8+	T_cells_c4_CD8+_ZFP36	HER2+	no_gene_module	no_scTYPER_call	no_inferCNV_call	no_CNA_value
CID3586_CTCATTATCGAGGTAG	CID3586	1.38549	1227	553	T-cells	T cells CD8+	T_cells_c4_CD8+_ZFP36	HER2+	no_gene_module	no_scTYPER_call	no_inferCNV_call	no_CNA_value
CID3586_GACTAACCACCATGTA	CID3586	5.13011	1345	670	T-cells	T cells CD8+	T_cells_c4_CD8+_ZFP36	HER2+	no_gene_module	no_scTYPER_call	no_inferCNV_call	no_CNA_value
CID3586_GTTACAGAGCGACGTA	CID3586	6.10687	786	418	T-cells	T cells CD8+	T_cells_c4_CD8+_ZFP36	HER2+	no_gene_module	no_scTYPER_call	no_inferCNV_call	no_CNA_value
CID3586_TAGCCGGCATGGTTGT	CID3586	6.05096	1570	759	T-cells	T cells CD8+	T_cells_c4_CD8+_ZFP36	HER2+	no_gene_module	no_scTYPER_call	no_inferCNV_call	no_CNA_value
CID3586_TCGCGTTTCATCGATG	CID3586	2.98285	2682	932	T-cells	T cells CD8+	T_cells_c4_CD8+_ZFP36	HER2+	no_gene_module	no_scTYPER_call	no_inferCNV_call	no_CNA_value
CID3586_TCTCTAATCCTAGAAC	CID3586	6.8836	1598	669	T-cells	T cells CD8+	T_cells_c4_CD8+_ZFP36	HER2+	no_gene_module	no_scTYPER_call	no_inferCNV_call	no_CNA_value
CID3586_TCTGAGACAGATCCAT	CID3586	2.7673	1590	721	T-cells	T cells CD8+	T_cells_c4_CD8+_ZFP36	HER2+	no_gene_module	no_scTYPER_call	no_inferCNV_call	no_CNA_value
CID3586_TTCCCAGAGCGATAGC	CID3586	5.60641	874	485	T-cells	T cells CD8+	T_cells_c4_CD8+_ZFP36	HER2+	no_gene_module	no_scTYPER_call	no_inferCNV_call	no_CNA_value
CID3586_ATAACGCTCAACGCTA	CID3586	4.09042	1858	776	T-cells	T cells CD8+	T_cells_c4_CD8+_ZFP36	HER2+	no_gene_module	no_scTYPER_call	no_inferCNV_call	no_CNA_value
CID3586_GAAACTCCACATGTGT	CID3586	3.19582	1721	746	T-cells	T cells CD8+	T_cells_c4_CD8+_ZFP36	HER2+	no_gene_module	no_scTYPER_call	no_inferCNV_call	no_CNA_value
CID3586_TTGGCAAAGCTTATCG	CID3586	4.16667	1344	687	T-cells	T cells CD8+	T_cells_c4_CD8+_ZFP36	HER2+	no_gene_module	no_scTYPER_call	no_inferCNV_call	no_CNA_value
CID3586_ACCAGTAAGGCAAAGA	CID3586	7.01058	1512	668	T-cells	T cells CD8+	T_cells_c4_CD8+_ZFP36	HER2+	no_gene_module	no_scTYPER_call	no_inferCNV_call	no_CNA_value
CID3586_AGCTCCTTCCGCTGTT	CID3586	4.68004	2094	875	T-cells	T cells CD8+	T_cells_c4_CD8+_ZFP36	HER2+	no_gene_module	no_scTYPER_call	no_inferCNV_call	no_CNA_value
CID3586_CTAGAGTGTACCATCA	CID3586	11.6794	1310	582	T-cells	T cells CD8+	T_cells_c4_CD8+_ZFP36	HER2+	no_gene_module	no_scTYPER_call	no_inferCNV_call	no_CNA_value
CID3586_ATCGAGTGTTGCTCCT	CID3586	6.66667	2445	1173	T-cells	T cells CD8+	T_cells_c4_CD8+_ZFP36	HER2+	no_gene_module	no_scTYPER_call	no_inferCNV_call	no_CNA_value
CID3586_GAGTCCGGTTTGTTTC	CID3586	8.07229	1660	643	T-cells	T cells CD8+	T_cells_c4_CD8+_ZFP36	HER2+	no_gene_module	no_scTYPER_call	no_inferCNV_call	no_CNA_value
CID3586_TCAGCTCCAGGAATCG	CID3586	5.82631	2729	940	T-cells	T cells CD8+	T_cells_c4_CD8+_ZFP36	HER2+	no_gene_module	no_scTYPER_call	no_inferCNV_call	no_CNA_value
CID3586_ACCCACTAGCGATTCT	CID3586	2.28199	1227	662	T-cells	T cells CD8+	T_cells_c4_CD8+_ZFP36	HER2+	no_gene_module	no_scTYPER_call	no_inferCNV_call	no_CNA_value
CID3586_ACTGTCCAGTCATGCT	CID3586	2.72277	2424	966	T-cells	T cells CD8+	T_cells_c4_CD8+_ZFP36	HER2+	no_gene_module	no_scTYPER_call	no_inferCNV_call	no_CNA_value
CID3586_CCAGCGAAGATCACGG	CID3586	3.25077	1938	714	T-cells	T cells CD8+	T_cells_c4_CD8+_ZFP36	HER2+	no_gene_module	no_scTYPER_call	no_inferCNV_call	no_CNA_value
CID3586_CGTTGGGTCGGCGCTA	CID3586	4.07175	3512	1174	T-cells	T cells CD8+	T_cells_c4_CD8+_ZFP36	HER2+	no_gene_module	no_scTYPER_call	no_inferCNV_call	no_CNA_value
CID3586_GATCTAGAGTTGTCGT	CID3586	4.77327	1676	725	T-cells	T cells CD8+	T_cells_c4_CD8+_ZFP36	HER2+	no_gene_module	no_scTYPER_call	no_inferCNV_call	no_CNA_value
CID3586_TAAACCGCAGACGCAA	CID3586	5.41427	1219	723	T-cells	T cells CD8+	T_cells_c4_CD8+_ZFP36	HER2+	no_gene_module	no_scTYPER_call	no_inferCNV_call	no_CNA_value
CID3586_TGCGGGTAGCGTAATA	CID3586	3.08935	2104	897	T-cells	T cells CD8+	T_cells_c4_CD8+_ZFP36	HER2+	no_gene_module	no_scTYPER_call	no_inferCNV_call	no_CNA_value
CID3586_AGTGGGAAGGCAATTA	CID3586	3.298	1698	766	T-cells	T cells CD8+	T_cells_c4_CD8+_ZFP36	HER2+	no_gene_module	no_scTYPER_call	no_inferCNV_call	no_CNA_value
CID3586_AGAGTGGAGCGTTGCC	CID3586	6.43087	1244	554	T-cells	T cells CD8+	T_cells_c6_IFIT1	HER2+	no_gene_module	no_scTYPER_call	no_inferCNV_call	no_CNA_value
CID3586_AGAGTGGTCAAGGCTT	CID3586	1.87542	1493	671	T-cells	T cells CD8+	T_cells_c6_IFIT1	HER2+	no_gene_module	no_scTYPER_call	no_inferCNV_call	no_CNA_value
CID3586_AGGGTGACACTAGTAC	CID3586	13.7609	1497	747	T-cells	T cells CD8+	T_cells_c6_IFIT1	HER2+	no_gene_module	no_scTYPER_call	no_inferCNV_call	no_CNA_value
CID3586_CAGCTGGGTAAATACG	CID3586	4.57436	4875	1782	T-cells	T cells CD8+	T_cells_c6_IFIT1	HER2+	no_gene_module	no_scTYPER_call	no_inferCNV_call	no_CNA_value
CID3586_CAGTCCTCATCCGCGA	CID3586	5.42776	3869	1407	T-cells	T cells CD8+	T_cells_c6_IFIT1	HER2+	no_gene_module	no_scTYPER_call	no_inferCNV_call	no_CNA_value
CID3586_CCACCTATCGCCTGAG	CID3586	4.34389	1105	600	T-cells	T cells CD8+	T_cells_c6_IFIT1	HER2+	no_gene_module	no_scTYPER_call	no_inferCNV_call	no_CNA_value
CID3586_GACTGCGCATGGGACA	CID3586	4.29621	1769	885	T-cells	T cells CD8+	T_cells_c6_IFIT1	HER2+	no_gene_module	no_scTYPER_call	no_inferCNV_call	no_CNA_value
CID3586_GCTCTGTTCTCTGAGA	CID3586	5.2939	2739	1190	T-cells	T cells CD8+	T_cells_c6_IFIT1	HER2+	no_gene_module	no_scTYPER_call	no_inferCNV_call	no_CNA_value
CID3586_TGTGTTTGTGGTCTCG	CID3586	5.29644	2530	1173	T-cells	T cells CD8+	T_cells_c6_IFIT1	HER2+	no_gene_module	no_scTYPER_call	no_inferCNV_call	no_CNA_value
CID3586_GCATACAGTGGTCCGT	CID3586	6.90673	1694	920	T-cells	T cells CD8+	T_cells_c6_IFIT1	HER2+	no_gene_module	no_scTYPER_call	no_inferCNV_call	no_CNA_value
CID3586_AAAGATGGTGCAGACA	CID3586	5.55127	1297	735	T-cells	T cells CD8+	T_cells_c6_IFIT1	HER2+	no_gene_module	no_scTYPER_call	no_inferCNV_call	no_CNA_value
CID3586_GCTGCTTAGTCACGCC	CID3586	4.18446	1171	578	T-cells	T cells CD8+	T_cells_c6_IFIT1	HER2+	no_gene_module	no_scTYPER_call	no_inferCNV_call	no_CNA_value
CID3586_CTACCCACAGATCTGT	CID3586	1.97548	1468	639	T-cells	T cells CD8+	T_cells_c6_IFIT1	HER2+	no_gene_module	no_scTYPER_call	no_inferCNV_call	no_CNA_value
CID3586_ACAGCCGCATGGAATA	CID3586	2.36934	1435	754	T-cells	T cells CD8+	T_cells_c6_IFIT1	HER2+	no_gene_module	no_scTYPER_call	no_inferCNV_call	no_CNA_value
CID3586_CTACGTCAGTATTGGA	CID3586	3.05755	3336	953	T-cells	T cells CD8+	T_cells_c6_IFIT1	HER2+	no_gene_module	no_scTYPER_call	no_inferCNV_call	no_CNA_value
CID3586_ATCCACCGTCAAAGCG	CID3586	0.0639795	1563	747	T-cells	T cells CD8+	T_cells_c6_IFIT1	HER2+	no_gene_module	no_scTYPER_call	no_inferCNV_call	no_CNA_value
CID3586_CCGTACTTCACTGGGC	CID3586	4.23683	1841	753	T-cells	T cells CD8+	T_cells_c6_IFIT1	HER2+	no_gene_module	no_scTYPER_call	no_inferCNV_call	no_CNA_value
CID3586_CTCACACTCACCACCT	CID3586	2.28083	1403	622	T-cells	T cells CD8+	T_cells_c6_IFIT1	HER2+	no_gene_module	no_scTYPER_call	no_inferCNV_call	no_CNA_value
CID3586_TGGGCGTCATACCATG	CID3586	5.76408	2238	879	T-cells	T cells CD8+	T_cells_c6_IFIT1	HER2+	no_gene_module	no_scTYPER_call	no_inferCNV_call	no_CNA_value
CID3586_AGGTCATTCTTGTACT	CID3586	4.1048	2290	852	T-cells	T cells CD8+	T_cells_c6_IFIT1	HER2+	no_gene_module	no_scTYPER_call	no_inferCNV_call	no_CNA_value
CID3586_CCTAAAGCATGCCCGA	CID3586	3.23642	1823	837	T-cells	T cells CD8+	T_cells_c6_IFIT1	HER2+	no_gene_module	no_scTYPER_call	no_inferCNV_call	no_CNA_value
CID3586_CGCTTCAGTCTAGCGC	CID3586	6.00098	2033	816	T-cells	T cells CD8+	T_cells_c6_IFIT1	HER2+	no_gene_module	no_scTYPER_call	no_inferCNV_call	no_CNA_value
CID3586_TATCTCATCTGCTTGC	CID3586	11.2452	2321	965	T-cells	T cells CD8+	T_cells_c6_IFIT1	HER2+	no_gene_module	no_scTYPER_call	no_inferCNV_call	no_CNA_value
CID3586_TATTACCAGATGGGTC	CID3586	2.76817	2312	920	T-cells	T cells CD8+	T_cells_c6_IFIT1	HER2+	no_gene_module	no_scTYPER_call	no_inferCNV_call	no_CNA_value
CID3586_GGAACTTGTTACAGAA	CID3586	7.72608	2278	830	T-cells	T cells CD8+	T_cells_c6_IFIT1	HER2+	no_gene_module	no_scTYPER_call	no_inferCNV_call	no_CNA_value
CID3586_ACATGGTAGGCAATTA	CID3586	3.49941	3372	1221	T-cells	T cells CD8+	T_cells_c6_IFIT1	HER2+	no_gene_module	no_scTYPER_call	no_inferCNV_call	no_CNA_value
CID3586_ACCCACTTCGTCCAGG	CID3586	3.05603	1178	602	T-cells	T cells CD8+	T_cells_c6_IFIT1	HER2+	no_gene_module	no_scTYPER_call	no_inferCNV_call	no_CNA_value
CID3586_ACCGTAAGTGGTAACG	CID3586	5.76533	2463	1033	T-cells	T cells CD8+	T_cells_c6_IFIT1	HER2+	no_gene_module	no_scTYPER_call	no_inferCNV_call	no_CNA_value
CID3586_ACGGGCTTCTGGCGAC	CID3586	3.00546	2196	1081	T-cells	T cells CD8+	T_cells_c6_IFIT1	HER2+	no_gene_module	no_scTYPER_call	no_inferCNV_call	no_CNA_value
CID3586_ATAACGCTCGGTCTAA	CID3586	3.30418	2058	1030	T-cells	T cells CD8+	T_cells_c6_IFIT1	HER2+	no_gene_module	no_scTYPER_call	no_inferCNV_call	no_CNA_value
CID3586_ATCTGCCTCAAGAAGT	CID3586	3.13663	1881	894	T-cells	T cells CD8+	T_cells_c6_IFIT1	HER2+	no_gene_module	no_scTYPER_call	no_inferCNV_call	no_CNA_value
CID3586_CAACCAAGTACATGTC	CID3586	3.50765	1568	822	T-cells	T cells CD8+	T_cells_c6_IFIT1	HER2+	no_gene_module	no_scTYPER_call	no_inferCNV_call	no_CNA_value
CID3586_CAAGATCTCTGAGTGT	CID3586	3.53982	1695	763	T-cells	T cells CD8+	T_cells_c6_IFIT1	HER2+	no_gene_module	no_scTYPER_call	no_inferCNV_call	no_CNA_value
CID3586_CACAGTATCTTGTATC	CID3586	4.73802	1794	915	T-cells	T cells CD8+	T_cells_c6_IFIT1	HER2+	no_gene_module	no_scTYPER_call	no_inferCNV_call	no_CNA_value
CID3586_CACATAGGTCCGAATT	CID3586	3.71204	1778	716	T-cells	T cells CD8+	T_cells_c6_IFIT1	HER2+	no_gene_module	no_scTYPER_call	no_inferCNV_call	no_CNA_value
CID3586_CACCTTGAGATCTGAA	CID3586	5.26932	1708	635	T-cells	T cells CD8+	T_cells_c6_IFIT1	HER2+	no_gene_module	no_scTYPER_call	no_inferCNV_call	no_CNA_value
CID3586_CATATTCTCACTCCTG	CID3586	5.01931	777	405	T-cells	T cells CD8+	T_cells_c6_IFIT1	HER2+	no_gene_module	no_scTYPER_call	no_inferCNV_call	no_CNA_value
CID3586_CATGACACACCGTTGG	CID3586	3.2491	3324	1044	T-cells	T cells CD8+	T_cells_c6_IFIT1	HER2+	no_gene_module	no_scTYPER_call	no_inferCNV_call	no_CNA_value
CID3586_CCACTACAGACAGGCT	CID3586	5.07953	1949	795	T-cells	T cells CD8+	T_cells_c6_IFIT1	HER2+	no_gene_module	no_scTYPER_call	no_inferCNV_call	no_CNA_value
CID3586_CCACTACAGAGTCGGT	CID3586	5.19751	3367	1217	T-cells	T cells CD8+	T_cells_c6_IFIT1	HER2+	no_gene_module	no_scTYPER_call	no_inferCNV_call	no_CNA_value
CID3586_CCCAATCGTACCGGCT	CID3586	5.78801	1434	568	T-cells	T cells CD8+	T_cells_c6_IFIT1	HER2+	no_gene_module	no_scTYPER_call	no_inferCNV_call	no_CNA_value
CID3586_CCGTACTCATGCAACT	CID3586	4.16517	2785	1054	T-cells	T cells CD8+	T_cells_c6_IFIT1	HER2+	no_gene_module	no_scTYPER_call	no_inferCNV_call	no_CNA_value
CID3586_CCTTACGGTAAGTGGC	CID3586	4.24455	2568	763	T-cells	T cells CD8+	T_cells_c6_IFIT1	HER2+	no_gene_module	no_scTYPER_call	no_inferCNV_call	no_CNA_value
CID3586_CGCTTCAAGATGTAAC	CID3586	3.29354	2429	790	T-cells	T cells CD8+	T_cells_c6_IFIT1	HER2+	no_gene_module	no_scTYPER_call	no_inferCNV_call	no_CNA_value
CID3586_CGGAGCTTCCTCGCAT	CID3586	4.42547	2576	818	T-cells	T cells CD8+	T_cells_c6_IFIT1	HER2+	no_gene_module	no_scTYPER_call	no_inferCNV_call	no_CNA_value
CID3586_CGTCTACAGACAGAGA	CID3586	1.49925	2668	1040	T-cells	T cells CD8+	T_cells_c6_IFIT1	HER2+	no_gene_module	no_scTYPER_call	no_inferCNV_call	no_CNA_value
CID3586_CGTGAGCCAAGCTGGA	CID3586	4.91585	2258	822	T-cells	T cells CD8+	T_cells_c6_IFIT1	HER2+	no_gene_module	no_scTYPER_call	no_inferCNV_call	no_CNA_value
CID3586_CGTTCTGAGTGTGGCA	CID3586	1.48515	1818	824	T-cells	T cells CD8+	T_cells_c6_IFIT1	HER2+	no_gene_module	no_scTYPER_call	no_inferCNV_call	no_CNA_value
CID3586_CTAATGGGTAGAAGGA	CID3586	6.22568	1542	686	T-cells	T cells CD8+	T_cells_c6_IFIT1	HER2+	no_gene_module	no_scTYPER_call	no_inferCNV_call	no_CNA_value
CID3586_CTGATAGAGGATGTAT	CID3586	7.62542	2990	1008	T-cells	T cells CD8+	T_cells_c6_IFIT1	HER2+	no_gene_module	no_scTYPER_call	no_inferCNV_call	no_CNA_value
CID3586_CTGCTGTGTAACGACG	CID3586	6.42589	2132	787	T-cells	T cells CD8+	T_cells_c6_IFIT1	HER2+	no_gene_module	no_scTYPER_call	no_inferCNV_call	no_CNA_value
CID3586_GCCTCTAAGCATCATC	CID3586	3.2888	973	498	T-cells	T cells CD8+	T_cells_c6_IFIT1	HER2+	no_gene_module	no_scTYPER_call	no_inferCNV_call	no_CNA_value
CID3586_GCTGCTTTCTTAGCCC	CID3586	7.54052	1419	599	T-cells	T cells CD8+	T_cells_c6_IFIT1	HER2+	no_gene_module	no_scTYPER_call	no_inferCNV_call	no_CNA_value
CID3586_GGAACTTAGTTGAGTA	CID3586	3.68646	2577	958	T-cells	T cells CD8+	T_cells_c6_IFIT1	HER2+	no_gene_module	no_scTYPER_call	no_inferCNV_call	no_CNA_value
CID3586_GGATGTTAGCTATGCT	CID3586	9.17993	817	468	T-cells	T cells CD8+	T_cells_c6_IFIT1	HER2+	no_gene_module	no_scTYPER_call	no_inferCNV_call	no_CNA_value
CID3586_GGGCATCAGAACTCGG	CID3586	3.17741	1133	723	T-cells	T cells CD8+	T_cells_c6_IFIT1	HER2+	no_gene_module	no_scTYPER_call	no_inferCNV_call	no_CNA_value
CID3586_TCAGATGCAACTGGCC	CID3586	3.9347	2389	1023	T-cells	T cells CD8+	T_cells_c6_IFIT1	HER2+	no_gene_module	no_scTYPER_call	no_inferCNV_call	no_CNA_value
CID3586_TGATTTCGTTCGTGAT	CID3586	5.21781	2089	854	T-cells	T cells CD8+	T_cells_c6_IFIT1	HER2+	no_gene_module	no_scTYPER_call	no_inferCNV_call	no_CNA_value
CID3586_TGGCGCATCGTGGACC	CID3586	4.38596	1254	518	T-cells	T cells CD8+	T_cells_c6_IFIT1	HER2+	no_gene_module	no_scTYPER_call	no_inferCNV_call	no_CNA_value
CID3586_TGTGGTATCGTCACGG	CID3586	1.20482	830	554	T-cells	T cells CD8+	T_cells_c6_IFIT1	HER2+	no_gene_module	no_scTYPER_call	no_inferCNV_call	no_CNA_value
CID3586_TTTGGTTTCCTAAGTG	CID3586	7.62943	734	463	T-cells	T cells CD8+	T_cells_c6_IFIT1	HER2+	no_gene_module	no_scTYPER_call	no_inferCNV_call	no_CNA_value
CID3586_GACTGCGAGAGGTTGC	CID3586	7.41784	2130	880	T-cells	T cells CD8+	T_cells_c6_IFIT1	HER2+	no_gene_module	no_scTYPER_call	no_inferCNV_call	no_CNA_value
CID3586_ATCCGAACACGCGAAA	CID3586	4.45977	2175	879	T-cells	T cells CD8+	T_cells_c6_IFIT1	HER2+	no_gene_module	no_scTYPER_call	no_inferCNV_call	no_CNA_value
CID3586_GCGACCACATCCTAGA	CID3586	5.3616	3208	1232	T-cells	T cells CD8+	T_cells_c6_IFIT1	HER2+	no_gene_module	no_scTYPER_call	no_inferCNV_call	no_CNA_value
CID3586_CGAGCACCACGTCTCT	CID3586	2.29211	1876	945	T-cells	T cells CD8+	T_cells_c6_IFIT1	HER2+	no_gene_module	no_scTYPER_call	no_inferCNV_call	no_CNA_value
CID3586_ACTATCTAGTTACCCA	CID3586	7.0331	1692	699	T-cells	T cells CD8+	T_cells_c6_IFIT1	HER2+	no_gene_module	no_scTYPER_call	no_inferCNV_call	no_CNA_value
CID3586_CAGAGAGAGTTACCCA	CID3586	6.25	2272	922	T-cells	T cells CD8+	T_cells_c6_IFIT1	HER2+	no_gene_module	no_scTYPER_call	no_inferCNV_call	no_CNA_value
CID3586_CTTAGGATCTATGTGG	CID3586	5.11911	1973	860	T-cells	T cells CD8+	T_cells_c6_IFIT1	HER2+	no_gene_module	no_scTYPER_call	no_inferCNV_call	no_CNA_value
CID3586_TGCGGGTTCCTGCAGG	CID3586	6.72043	1488	726	T-cells	T cells CD8+	T_cells_c6_IFIT1	HER2+	no_gene_module	no_scTYPER_call	no_inferCNV_call	no_CNA_value
CID3586_TGGTTAGGTCGAGTTT	CID3586	11.2681	3044	1188	T-cells	T cells CD8+	T_cells_c6_IFIT1	HER2+	no_gene_module	no_scTYPER_call	no_inferCNV_call	no_CNA_value
CID3586_CCTACACAGTACATGA	CID3586	3.51259	3217	1006	T-cells	T cells CD8+	T_cells_c6_IFIT1	HER2+	no_gene_module	no_scTYPER_call	no_inferCNV_call	no_CNA_value
CID3586_ACCGTAACATACTCTT	CID3586	7.54139	1631	663	T-cells	T cells CD8+	T_cells_c6_IFIT1	HER2+	no_gene_module	no_scTYPER_call	no_inferCNV_call	no_CNA_value
CID3586_CACCAGGCACAAGCCC	CID3586	4.89418	2268	867	T-cells	T cells CD8+	T_cells_c6_IFIT1	HER2+	no_gene_module	no_scTYPER_call	no_inferCNV_call	no_CNA_value
CID3586_TAAGTGCAGGAATCGC	CID3586	5.764	1839	733	T-cells	T cells CD8+	T_cells_c6_IFIT1	HER2+	no_gene_module	no_scTYPER_call	no_inferCNV_call	no_CNA_value
CID3586_CGGACTGTCTTAGAGC	CID3586	4.01914	2090	774	T-cells	T cells CD8+	T_cells_c6_IFIT1	HER2+	no_gene_module	no_scTYPER_call	no_inferCNV_call	no_CNA_value
CID3586_CTCGTACAGAATGTTG	CID3586	5.6867	932	424	T-cells	T cells CD8+	T_cells_c6_IFIT1	HER2+	no_gene_module	no_scTYPER_call	no_inferCNV_call	no_CNA_value
CID3586_GACTACAAGGACGAAA	CID3586	6.60573	2407	992	T-cells	T cells CD8+	T_cells_c6_IFIT1	HER2+	no_gene_module	no_scTYPER_call	no_inferCNV_call	no_CNA_value
CID3586_TACGGATAGACTTTCG	CID3586	5.26316	2299	970	T-cells	T cells CD8+	T_cells_c6_IFIT1	HER2+	no_gene_module	no_scTYPER_call	no_inferCNV_call	no_CNA_value
CID3586_ACCCACTTCGTACGGC	CID3586	1.70743	2167	966	T-cells	T cells CD8+	T_cells_c6_IFIT1	HER2+	no_gene_module	no_scTYPER_call	no_inferCNV_call	no_CNA_value
CID3586_CAAGAAAGTCCGAAGA	CID3586	3.84149	2473	931	T-cells	T cells CD8+	T_cells_c6_IFIT1	HER2+	no_gene_module	no_scTYPER_call	no_inferCNV_call	no_CNA_value
CID3586_CTCTGGTCAGTGGGAT	CID3586	5.86538	3120	1225	T-cells	T cells CD8+	T_cells_c6_IFIT1	HER2+	no_gene_module	no_scTYPER_call	no_inferCNV_call	no_CNA_value
CID3586_CTACCCATCTGTCTCG	CID3586	4.36627	5657	1882	T-cells	T cells CD8+	T_cells_c6_IFIT1	HER2+	no_gene_module	no_scTYPER_call	no_inferCNV_call	no_CNA_value
CID3586_CATGGCGAGTAGCCGA	CID3586	4.57165	2603	885	T-cells	T cells CD8+	T_cells_c5_CD8+_GZMK	HER2+	no_gene_module	no_scTYPER_call	no_inferCNV_call	no_CNA_value
CID3586_ATAAGAGTCGTTACGA	CID3586	6.21716	1142	537	T-cells	T cells CD8+	T_cells_c5_CD8+_GZMK	HER2+	no_gene_module	no_scTYPER_call	no_inferCNV_call	no_CNA_value
CID3586_ACTGATGAGGTGACCA	CID3586	2.12912	1456	662	T-cells	T cells CD8+	T_cells_c7_CD8+_IFNG	HER2+	no_gene_module	no_scTYPER_call	no_inferCNV_call	no_CNA_value
CID3586_CTTAACTAGAGATGAG	CID3586	7.39385	1366	644	T-cells	T cells CD8+	T_cells_c7_CD8+_IFNG	HER2+	no_gene_module	no_scTYPER_call	no_inferCNV_call	no_CNA_value
CID3586_GCTCCTAAGTTGAGAT	CID3586	2.13542	1920	901	T-cells	T cells CD8+	T_cells_c7_CD8+_IFNG	HER2+	no_gene_module	no_scTYPER_call	no_inferCNV_call	no_CNA_value
CID3586_GGGAGATAGCCACGCT	CID3586	4.67626	834	494	T-cells	T cells CD8+	T_cells_c7_CD8+_IFNG	HER2+	no_gene_module	no_scTYPER_call	no_inferCNV_call	no_CNA_value
CID3586_TAGTTGGGTTAAGACA	CID3586	5.08048	1988	781	T-cells	T cells CD8+	T_cells_c7_CD8+_IFNG	HER2+	no_gene_module	no_scTYPER_call	no_inferCNV_call	no_CNA_value
CID3586_TGAGCATCACCGATAT	CID3586	3.62274	1601	641	T-cells	T cells CD8+	T_cells_c7_CD8+_IFNG	HER2+	no_gene_module	no_scTYPER_call	no_inferCNV_call	no_CNA_value
CID3586_AAAGCAAGTGCAACGA	CID3586	9.75965	1373	619	T-cells	T cells CD8+	T_cells_c7_CD8+_IFNG	HER2+	no_gene_module	no_scTYPER_call	no_inferCNV_call	no_CNA_value
CID3586_AACCATGAGGCCCTCA	CID3586	6.71141	1192	562	T-cells	T cells CD8+	T_cells_c7_CD8+_IFNG	HER2+	no_gene_module	no_scTYPER_call	no_inferCNV_call	no_CNA_value
CID3586_AACCGCGTCCGGGTGT	CID3586	6.02696	1261	620	T-cells	T cells CD8+	T_cells_c7_CD8+_IFNG	HER2+	no_gene_module	no_scTYPER_call	no_inferCNV_call	no_CNA_value
CID3586_AACCGCGTCTGATTCT	CID3586	0.870322	1149	542	T-cells	T cells CD8+	T_cells_c7_CD8+_IFNG	HER2+	no_gene_module	no_scTYPER_call	no_inferCNV_call	no_CNA_value
CID3586_AACTCCCCAAGGTTCT	CID3586	3.61538	1300	623	T-cells	T cells CD8+	T_cells_c7_CD8+_IFNG	HER2+	no_gene_module	no_scTYPER_call	no_inferCNV_call	no_CNA_value
CID3586_AACTCTTGTTGACGTT	CID3586	3.67925	1060	504	T-cells	T cells CD8+	T_cells_c7_CD8+_IFNG	HER2+	no_gene_module	no_scTYPER_call	no_inferCNV_call	no_CNA_value
CID3586_AACTGGTTCTAACTCT	CID3586	5.28986	1380	577	T-cells	T cells CD8+	T_cells_c7_CD8+_IFNG	HER2+	no_gene_module	no_scTYPER_call	no_inferCNV_call	no_CNA_value
CID3586_AAGGTTCCATGGAATA	CID3586	4.01584	1768	692	T-cells	T cells CD8+	T_cells_c7_CD8+_IFNG	HER2+	no_gene_module	no_scTYPER_call	no_inferCNV_call	no_CNA_value
CID3586_AAGTCTGAGACAATAC	CID3586	3.74532	1335	706	T-cells	T cells CD8+	T_cells_c7_CD8+_IFNG	HER2+	no_gene_module	no_scTYPER_call	no_inferCNV_call	no_CNA_value
CID3586_ACACCAATCATTCACT	CID3586	3.74046	1310	671	T-cells	T cells CD8+	T_cells_c7_CD8+_IFNG	HER2+	no_gene_module	no_scTYPER_call	no_inferCNV_call	no_CNA_value
CID3586_ACACCCTTCAGTGCAT	CID3586	4.37788	1302	709	T-cells	T cells CD8+	T_cells_c7_CD8+_IFNG	HER2+	no_gene_module	no_scTYPER_call	no_inferCNV_call	no_CNA_value
CID3586_ACACTGAAGTTACCCA	CID3586	3.78827	1927	784	T-cells	T cells CD8+	T_cells_c7_CD8+_IFNG	HER2+	no_gene_module	no_scTYPER_call	no_inferCNV_call	no_CNA_value
CID3586_ACACTGATCGCCCTTA	CID3586	8.69159	1070	610	T-cells	T cells CD8+	T_cells_c7_CD8+_IFNG	HER2+	no_gene_module	no_scTYPER_call	no_inferCNV_call	no_CNA_value
CID3586_ACCCACTGTCCCTACT	CID3586	5.95703	1024	522	T-cells	T cells CD8+	T_cells_c7_CD8+_IFNG	HER2+	no_gene_module	no_scTYPER_call	no_inferCNV_call	no_CNA_value
CID3586_ACGAGCCCAGCTGTGC	CID3586	9.20938	2302	786	T-cells	T cells CD8+	T_cells_c7_CD8+_IFNG	HER2+	no_gene_module	no_scTYPER_call	no_inferCNV_call	no_CNA_value
CID3586_ACGAGCCGTATCACCA	CID3586	2.43205	2097	701	T-cells	T cells CD8+	T_cells_c7_CD8+_IFNG	HER2+	no_gene_module	no_scTYPER_call	no_inferCNV_call	no_CNA_value
CID3586_ACGATACTCTGTTTGT	CID3586	4.35685	1446	733	T-cells	T cells CD8+	T_cells_c7_CD8+_IFNG	HER2+	no_gene_module	no_scTYPER_call	no_inferCNV_call	no_CNA_value
CID3586_ACGCAGCAGGAGCGTT	CID3586	4.77667	1612	726	T-cells	T cells CD8+	T_cells_c7_CD8+_IFNG	HER2+	no_gene_module	no_scTYPER_call	no_inferCNV_call	no_CNA_value
CID3586_ACGCCGATCTACTATC	CID3586	2.12282	2638	870	T-cells	T cells CD8+	T_cells_c7_CD8+_IFNG	HER2+	no_gene_module	no_scTYPER_call	no_inferCNV_call	no_CNA_value
CID3586_ACGCCGATCTGCCAGG	CID3586	4.62046	909	534	T-cells	T cells CD8+	T_cells_c7_CD8+_IFNG	HER2+	no_gene_module	no_scTYPER_call	no_inferCNV_call	no_CNA_value
CID3586_ACGGCCACACTAGTAC	CID3586	3.30314	1877	814	T-cells	T cells CD8+	T_cells_c7_CD8+_IFNG	HER2+	no_gene_module	no_scTYPER_call	no_inferCNV_call	no_CNA_value
CID3586_ACGGGCTCATCGGACC	CID3586	3.41124	1583	746	T-cells	T cells CD8+	T_cells_c7_CD8+_IFNG	HER2+	no_gene_module	no_scTYPER_call	no_inferCNV_call	no_CNA_value
CID3586_ACGTCAACATGCGCAC	CID3586	3.48525	746	486	T-cells	T cells CD8+	T_cells_c7_CD8+_IFNG	HER2+	no_gene_module	no_scTYPER_call	no_inferCNV_call	no_CNA_value
CID3586_ACGTCAATCGTCCGTT	CID3586	3.19527	845	431	T-cells	T cells CD8+	T_cells_c7_CD8+_IFNG	HER2+	no_gene_module	no_scTYPER_call	no_inferCNV_call	no_CNA_value
CID3586_ACTGAACGTACAGTGG	CID3586	2.35192	2296	946	T-cells	T cells CD8+	T_cells_c7_CD8+_IFNG	HER2+	no_gene_module	no_scTYPER_call	no_inferCNV_call	no_CNA_value
CID3586_ACTGAGTAGACTGGGT	CID3586	2.21377	2891	1281	T-cells	T cells CD8+	T_cells_c7_CD8+_IFNG	HER2+	no_gene_module	no_scTYPER_call	no_inferCNV_call	no_CNA_value
CID3586_ACTGCTCAGTAAGTAC	CID3586	3.25792	1105	628	T-cells	T cells CD8+	T_cells_c7_CD8+_IFNG	HER2+	no_gene_module	no_scTYPER_call	no_inferCNV_call	no_CNA_value
CID3586_ACTGTCCAGATCCCGC	CID3586	4.62361	2617	969	T-cells	T cells CD8+	T_cells_c7_CD8+_IFNG	HER2+	no_gene_module	no_scTYPER_call	no_inferCNV_call	no_CNA_value
CID3586_ACTTACTTCAGCGATT	CID3586	2.62097	1984	1033	T-cells	T cells CD8+	T_cells_c7_CD8+_IFNG	HER2+	no_gene_module	no_scTYPER_call	no_inferCNV_call	no_CNA_value
CID3586_AGAATAGTCGCCATAA	CID3586	4.70199	1510	699	T-cells	T cells CD8+	T_cells_c7_CD8+_IFNG	HER2+	no_gene_module	no_scTYPER_call	no_inferCNV_call	no_CNA_value
CID3586_AGCATACCAAAGGAAG	CID3586	4.09401	1319	619	T-cells	T cells CD8+	T_cells_c7_CD8+_IFNG	HER2+	no_gene_module	no_scTYPER_call	no_inferCNV_call	no_CNA_value
CID3586_AGCTTGAAGCTTATCG	CID3586	1.82173	1537	701	T-cells	T cells CD8+	T_cells_c7_CD8+_IFNG	HER2+	no_gene_module	no_scTYPER_call	no_inferCNV_call	no_CNA_value
CID3586_AGGCCGTCAATAGAGT	CID3586	3.125	1856	867	T-cells	T cells CD8+	T_cells_c7_CD8+_IFNG	HER2+	no_gene_module	no_scTYPER_call	no_inferCNV_call	no_CNA_value
CID3586_AGGGAGTAGCAACGGT	CID3586	4.11067	1265	642	T-cells	T cells CD8+	T_cells_c7_CD8+_IFNG	HER2+	no_gene_module	no_scTYPER_call	no_inferCNV_call	no_CNA_value
CID3586_AGGGATGCAGTGGAGT	CID3586	4.55026	945	502	T-cells	T cells CD8+	T_cells_c7_CD8+_IFNG	HER2+	no_gene_module	no_scTYPER_call	no_inferCNV_call	no_CNA_value
CID3586_AGGGTGAAGGTGGGTT	CID3586	2.78373	1401	715	T-cells	T cells CD8+	T_cells_c7_CD8+_IFNG	HER2+	no_gene_module	no_scTYPER_call	no_inferCNV_call	no_CNA_value
CID3586_AGGTCATGTAGAGTGC	CID3586	10.644	1118	567	T-cells	T cells CD8+	T_cells_c7_CD8+_IFNG	HER2+	no_gene_module	no_scTYPER_call	no_inferCNV_call	no_CNA_value
CID3586_AGTCTTTAGTCTCAAC	CID3586	3.85164	1402	657	T-cells	T cells CD8+	T_cells_c7_CD8+_IFNG	HER2+	no_gene_module	no_scTYPER_call	no_inferCNV_call	no_CNA_value
CID3586_AGTCTTTGTTGCGTTA	CID3586	6.12378	1535	622	T-cells	T cells CD8+	T_cells_c7_CD8+_IFNG	HER2+	no_gene_module	no_scTYPER_call	no_inferCNV_call	no_CNA_value
CID3586_AGTGAGGGTATTCGTG	CID3586	3.81184	1233	488	T-cells	T cells CD8+	T_cells_c7_CD8+_IFNG	HER2+	no_gene_module	no_scTYPER_call	no_inferCNV_call	no_CNA_value
CID3586_ATCACGATCCGAAGAG	CID3586	5.96095	973	502	T-cells	T cells CD8+	T_cells_c7_CD8+_IFNG	HER2+	no_gene_module	no_scTYPER_call	no_inferCNV_call	no_CNA_value
CID3586_ATCATGGCATGTCTCC	CID3586	4.34496	1519	702	T-cells	T cells CD8+	T_cells_c7_CD8+_IFNG	HER2+	no_gene_module	no_scTYPER_call	no_inferCNV_call	no_CNA_value
CID3586_ATCATGGGTGCGATAG	CID3586	3.51562	2048	732	T-cells	T cells CD8+	T_cells_c7_CD8+_IFNG	HER2+	no_gene_module	no_scTYPER_call	no_inferCNV_call	no_CNA_value
CID3586_ATGCGATTCAAAGACA	CID3586	6.10465	1720	739	T-cells	T cells CD8+	T_cells_c7_CD8+_IFNG	HER2+	no_gene_module	no_scTYPER_call	no_inferCNV_call	no_CNA_value
CID3586_ATGCGATTCCAAATGC	CID3586	14.0614	1465	600	T-cells	T cells CD8+	T_cells_c7_CD8+_IFNG	HER2+	no_gene_module	no_scTYPER_call	no_inferCNV_call	no_CNA_value
CID3586_ATGTGTGCATCGTCGG	CID3586	5.62972	1723	791	T-cells	T cells CD8+	T_cells_c7_CD8+_IFNG	HER2+	no_gene_module	no_scTYPER_call	no_inferCNV_call	no_CNA_value
CID3586_ATTATCCTCCGCTGTT	CID3586	2.93945	1701	804	T-cells	T cells CD8+	T_cells_c7_CD8+_IFNG	HER2+	no_gene_module	no_scTYPER_call	no_inferCNV_call	no_CNA_value
CID3586_ATTGGTGGTCAAAGCG	CID3586	2.32701	1633	780	T-cells	T cells CD8+	T_cells_c7_CD8+_IFNG	HER2+	no_gene_module	no_scTYPER_call	no_inferCNV_call	no_CNA_value
CID3586_ATTTCTGAGCCCGAAA	CID3586	4.03159	2406	976	T-cells	T cells CD8+	T_cells_c7_CD8+_IFNG	HER2+	no_gene_module	no_scTYPER_call	no_inferCNV_call	no_CNA_value
CID3586_ATTTCTGGTAATTGGA	CID3586	4.81994	1805	806	T-cells	T cells CD8+	T_cells_c7_CD8+_IFNG	HER2+	no_gene_module	no_scTYPER_call	no_inferCNV_call	no_CNA_value
CID3586_CAACCTCAGCTACCGC	CID3586	3.34101	1736	844	T-cells	T cells CD8+	T_cells_c7_CD8+_IFNG	HER2+	no_gene_module	no_scTYPER_call	no_inferCNV_call	no_CNA_value
CID3586_CAACTAGAGTGTTGAA	CID3586	5.82404	2421	875	T-cells	T cells CD8+	T_cells_c7_CD8+_IFNG	HER2+	no_gene_module	no_scTYPER_call	no_inferCNV_call	no_CNA_value
CID3586_CAAGAAAAGATAGGAG	CID3586	2.08668	1246	591	T-cells	T cells CD8+	T_cells_c7_CD8+_IFNG	HER2+	no_gene_module	no_scTYPER_call	no_inferCNV_call	no_CNA_value
CID3586_CACAAACAGTGTTGAA	CID3586	3.04878	1148	567	T-cells	T cells CD8+	T_cells_c7_CD8+_IFNG	HER2+	no_gene_module	no_scTYPER_call	no_inferCNV_call	no_CNA_value
CID3586_CACAAACGTGATGTCT	CID3586	8.80579	829	462	T-cells	T cells CD8+	T_cells_c7_CD8+_IFNG	HER2+	no_gene_module	no_scTYPER_call	no_inferCNV_call	no_CNA_value
CID3586_CACAGTACAAGAGTCG	CID3586	5.40265	981	514	T-cells	T cells CD8+	T_cells_c7_CD8+_IFNG	HER2+	no_gene_module	no_scTYPER_call	no_inferCNV_call	no_CNA_value
CID3586_CACTCCAGTTCTCATT	CID3586	3.66044	1284	623	T-cells	T cells CD8+	T_cells_c7_CD8+_IFNG	HER2+	no_gene_module	no_scTYPER_call	no_inferCNV_call	no_CNA_value
CID3586_CAGAATCGTAAGTGGC	CID3586	5.45939	751	412	T-cells	T cells CD8+	T_cells_c7_CD8+_IFNG	HER2+	no_gene_module	no_scTYPER_call	no_inferCNV_call	no_CNA_value
CID3586_CAGAGAGCATGTAAGA	CID3586	3.68254	1575	620	T-cells	T cells CD8+	T_cells_c7_CD8+_IFNG	HER2+	no_gene_module	no_scTYPER_call	no_inferCNV_call	no_CNA_value
CID3586_CAGCAGCAGAGTTGGC	CID3586	1.92413	1819	781	T-cells	T cells CD8+	T_cells_c7_CD8+_IFNG	HER2+	no_gene_module	no_scTYPER_call	no_inferCNV_call	no_CNA_value
CID3586_CAGCCGACAATAGCGG	CID3586	3.87409	826	468	T-cells	T cells CD8+	T_cells_c7_CD8+_IFNG	HER2+	no_gene_module	no_scTYPER_call	no_inferCNV_call	no_CNA_value
CID3586_CAGCGACAGCGCCTTG	CID3586	2.67286	1721	738	T-cells	T cells CD8+	T_cells_c7_CD8+_IFNG	HER2+	no_gene_module	no_scTYPER_call	no_inferCNV_call	no_CNA_value
CID3586_CAGCTAAAGACTAGGC	CID3586	6.10766	1932	831	T-cells	T cells CD8+	T_cells_c7_CD8+_IFNG	HER2+	no_gene_module	no_scTYPER_call	no_inferCNV_call	no_CNA_value
CID3586_CAGCTGGCAGTCGTGC	CID3586	2.76899	1264	642	T-cells	T cells CD8+	T_cells_c7_CD8+_IFNG	HER2+	no_gene_module	no_scTYPER_call	no_inferCNV_call	no_CNA_value
CID3586_CATCCACTCCTAGGGC	CID3586	1.25162	2317	902	T-cells	T cells CD8+	T_cells_c7_CD8+_IFNG	HER2+	no_gene_module	no_scTYPER_call	no_inferCNV_call	no_CNA_value
CID3586_CATCGAAAGCAATCTC	CID3586	4.14966	1470	589	T-cells	T cells CD8+	T_cells_c7_CD8+_IFNG	HER2+	no_gene_module	no_scTYPER_call	no_inferCNV_call	no_CNA_value
CID3586_CATCGAAGTTACAGAA	CID3586	6.77618	974	478	T-cells	T cells CD8+	T_cells_c7_CD8+_IFNG	HER2+	no_gene_module	no_scTYPER_call	no_inferCNV_call	no_CNA_value
CID3586_CATCGAAGTTAGGGTG	CID3586	6.5704	1385	807	T-cells	T cells CD8+	T_cells_c7_CD8+_IFNG	HER2+	no_gene_module	no_scTYPER_call	no_inferCNV_call	no_CNA_value
CID3586_CATCGGGAGGACTGGT	CID3586	3.8843	2420	825	T-cells	T cells CD8+	T_cells_c7_CD8+_IFNG	HER2+	no_gene_module	no_scTYPER_call	no_inferCNV_call	no_CNA_value
CID3586_CATGACAGTGTTTGTG	CID3586	8.27719	1039	565	T-cells	T cells CD8+	T_cells_c7_CD8+_IFNG	HER2+	no_gene_module	no_scTYPER_call	no_inferCNV_call	no_CNA_value
CID3586_CATGCCTCAGCTGTGC	CID3586	5.28926	6050	2373	T-cells	T cells CD8+	T_cells_c7_CD8+_IFNG	HER2+	no_gene_module	no_scTYPER_call	no_inferCNV_call	no_CNA_value
CID3586_CATGGCGCAAGAGTCG	CID3586	4.59159	2069	880	T-cells	T cells CD8+	T_cells_c7_CD8+_IFNG	HER2+	no_gene_module	no_scTYPER_call	no_inferCNV_call	no_CNA_value
CID3586_CATGGCGGTTGTACAC	CID3586	3.87205	1188	585	T-cells	T cells CD8+	T_cells_c7_CD8+_IFNG	HER2+	no_gene_module	no_scTYPER_call	no_inferCNV_call	no_CNA_value
CID3586_CCACCTAGTCCAGTTA	CID3586	3.27154	1834	662	T-cells	T cells CD8+	T_cells_c7_CD8+_IFNG	HER2+	no_gene_module	no_scTYPER_call	no_inferCNV_call	no_CNA_value
CID3586_CCACGGATCCTAGAAC	CID3586	3.18021	2264	1003	T-cells	T cells CD8+	T_cells_c7_CD8+_IFNG	HER2+	no_gene_module	no_scTYPER_call	no_inferCNV_call	no_CNA_value
CID3586_CCATTCGCACCCATGG	CID3586	3.3033	1665	699	T-cells	T cells CD8+	T_cells_c7_CD8+_IFNG	HER2+	no_gene_module	no_scTYPER_call	no_inferCNV_call	no_CNA_value
CID3586_CCCAATCCATACAGCT	CID3586	3.84115	1536	751	T-cells	T cells CD8+	T_cells_c7_CD8+_IFNG	HER2+	no_gene_module	no_scTYPER_call	no_inferCNV_call	no_CNA_value
CID3586_CCGTACTCACCCAGTG	CID3586	8.16697	551	323	T-cells	T cells CD8+	T_cells_c7_CD8+_IFNG	HER2+	no_gene_module	no_scTYPER_call	no_inferCNV_call	no_CNA_value
CID3586_CCGTTCACATGCTGGC	CID3586	3.64842	1206	610	T-cells	T cells CD8+	T_cells_c7_CD8+_IFNG	HER2+	no_gene_module	no_scTYPER_call	no_inferCNV_call	no_CNA_value
CID3586_CCTAAAGTCGTGGGAA	CID3586	5.9081	1371	662	T-cells	T cells CD8+	T_cells_c7_CD8+_IFNG	HER2+	no_gene_module	no_scTYPER_call	no_inferCNV_call	no_CNA_value
CID3586_CCTACACAGCTAGTTC	CID3586	2.95469	1523	714	T-cells	T cells CD8+	T_cells_c7_CD8+_IFNG	HER2+	no_gene_module	no_scTYPER_call	no_inferCNV_call	no_CNA_value
CID3586_CCTACACTCATCTGTT	CID3586	4	2275	834	T-cells	T cells CD8+	T_cells_c7_CD8+_IFNG	HER2+	no_gene_module	no_scTYPER_call	no_inferCNV_call	no_CNA_value
CID3586_CCTAGCTAGTAGGCCA	CID3586	6.94864	662	401	T-cells	T cells CD8+	T_cells_c7_CD8+_IFNG	HER2+	no_gene_module	no_scTYPER_call	no_inferCNV_call	no_CNA_value
CID3586_CCTCTGATCTTCGGTC	CID3586	1.99005	4623	1614	T-cells	T cells CD8+	T_cells_c7_CD8+_IFNG	HER2+	no_gene_module	no_scTYPER_call	no_inferCNV_call	no_CNA_value
CID3586_CCTTACGGTCGTGGCT	CID3586	5.51181	889	452	T-cells	T cells CD8+	T_cells_c7_CD8+_IFNG	HER2+	no_gene_module	no_scTYPER_call	no_inferCNV_call	no_CNA_value
CID3586_CCTTCCCGTCTCCACT	CID3586	7.33198	982	510	T-cells	T cells CD8+	T_cells_c7_CD8+_IFNG	HER2+	no_gene_module	no_scTYPER_call	no_inferCNV_call	no_CNA_value
CID3586_CCTTTCTTCCACGCAG	CID3586	0.849257	1884	864	T-cells	T cells CD8+	T_cells_c7_CD8+_IFNG	HER2+	no_gene_module	no_scTYPER_call	no_inferCNV_call	no_CNA_value
CID3586_CGAACATTCGGCGCAT	CID3586	3.44149	1017	486	T-cells	T cells CD8+	T_cells_c7_CD8+_IFNG	HER2+	no_gene_module	no_scTYPER_call	no_inferCNV_call	no_CNA_value
CID3586_CGAATGTCAAGGTTTC	CID3586	5.70207	1403	688	T-cells	T cells CD8+	T_cells_c7_CD8+_IFNG	HER2+	no_gene_module	no_scTYPER_call	no_inferCNV_call	no_CNA_value
CID3586_CGAATGTGTCGAACAG	CID3586	3.72303	2874	1015	T-cells	T cells CD8+	T_cells_c7_CD8+_IFNG	HER2+	no_gene_module	no_scTYPER_call	no_inferCNV_call	no_CNA_value
CID3586_CGAATGTTCGGTCCGA	CID3586	6.20985	934	416	T-cells	T cells CD8+	T_cells_c7_CD8+_IFNG	HER2+	no_gene_module	no_scTYPER_call	no_inferCNV_call	no_CNA_value
CID3586_CGACCTTCATTTCAGG	CID3586	4.17495	1006	540	T-cells	T cells CD8+	T_cells_c7_CD8+_IFNG	HER2+	no_gene_module	no_scTYPER_call	no_inferCNV_call	no_CNA_value
CID3586_CGAGCACGTGCGATAG	CID3586	6.28334	1687	834	T-cells	T cells CD8+	T_cells_c7_CD8+_IFNG	HER2+	no_gene_module	no_scTYPER_call	no_inferCNV_call	no_CNA_value
CID3586_CGAGCCAAGACCACGA	CID3586	0.935279	2673	1078	T-cells	T cells CD8+	T_cells_c7_CD8+_IFNG	HER2+	no_gene_module	no_scTYPER_call	no_inferCNV_call	no_CNA_value
CID3586_CGAGCCAAGTGACTCT	CID3586	6.25738	847	461	T-cells	T cells CD8+	T_cells_c7_CD8+_IFNG	HER2+	no_gene_module	no_scTYPER_call	no_inferCNV_call	no_CNA_value
CID3586_CGAGCCAGTGAGGGTT	CID3586	1.69622	1297	549	T-cells	T cells CD8+	T_cells_c7_CD8+_IFNG	HER2+	no_gene_module	no_scTYPER_call	no_inferCNV_call	no_CNA_value
CID3586_CGATCGGTCCTCATTA	CID3586	1.65543	1631	714	T-cells	T cells CD8+	T_cells_c7_CD8+_IFNG	HER2+	no_gene_module	no_scTYPER_call	no_inferCNV_call	no_CNA_value
CID3586_CGATTGAAGCGTGTCC	CID3586	2.94118	1190	556	T-cells	T cells CD8+	T_cells_c7_CD8+_IFNG	HER2+	no_gene_module	no_scTYPER_call	no_inferCNV_call	no_CNA_value
CID3586_CGCGGTAAGATGTGTA	CID3586	4.67563	1711	787	T-cells	T cells CD8+	T_cells_c7_CD8+_IFNG	HER2+	no_gene_module	no_scTYPER_call	no_inferCNV_call	no_CNA_value
CID3586_CGCTTCAGTGGACGAT	CID3586	2.20538	1451	645	T-cells	T cells CD8+	T_cells_c7_CD8+_IFNG	HER2+	no_gene_module	no_scTYPER_call	no_inferCNV_call	no_CNA_value
CID3586_CGGACTGTCAATCTCT	CID3586	6.15385	1950	722	T-cells	T cells CD8+	T_cells_c7_CD8+_IFNG	HER2+	no_gene_module	no_scTYPER_call	no_inferCNV_call	no_CNA_value
CID3586_CGGAGCTAGAAGCCCA	CID3586	3.18841	2415	922	T-cells	T cells CD8+	T_cells_c7_CD8+_IFNG	HER2+	no_gene_module	no_scTYPER_call	no_inferCNV_call	no_CNA_value
CID3586_CGGAGTCGTCATTAGC	CID3586	1.26761	1420	683	T-cells	T cells CD8+	T_cells_c7_CD8+_IFNG	HER2+	no_gene_module	no_scTYPER_call	no_inferCNV_call	no_CNA_value
CID3586_CGGAGTCGTTCTCATT	CID3586	3.79437	1634	719	T-cells	T cells CD8+	T_cells_c7_CD8+_IFNG	HER2+	no_gene_module	no_scTYPER_call	no_inferCNV_call	no_CNA_value
CID3586_CGGGTCATCCTGCCAT	CID3586	1.63112	797	407	T-cells	T cells CD8+	T_cells_c7_CD8+_IFNG	HER2+	no_gene_module	no_scTYPER_call	no_inferCNV_call	no_CNA_value
CID3586_CGTAGCGTCTGAAAGA	CID3586	3.43195	1690	771	T-cells	T cells CD8+	T_cells_c7_CD8+_IFNG	HER2+	no_gene_module	no_scTYPER_call	no_inferCNV_call	no_CNA_value
CID3586_CGTCCATTCTTAGAGC	CID3586	2.89203	1556	706	T-cells	T cells CD8+	T_cells_c7_CD8+_IFNG	HER2+	no_gene_module	no_scTYPER_call	no_inferCNV_call	no_CNA_value
CID3586_CGTGTAACATCCCACT	CID3586	6.30551	1126	545	T-cells	T cells CD8+	T_cells_c7_CD8+_IFNG	HER2+	no_gene_module	no_scTYPER_call	no_inferCNV_call	no_CNA_value
CID3586_CGTGTCTAGCAATCTC	CID3586	2.98507	2412	893	T-cells	T cells CD8+	T_cells_c7_CD8+_IFNG	HER2+	no_gene_module	no_scTYPER_call	no_inferCNV_call	no_CNA_value
CID3586_CGTTAGAAGCTCCTTC	CID3586	7.39477	879	477	T-cells	T cells CD8+	T_cells_c7_CD8+_IFNG	HER2+	no_gene_module	no_scTYPER_call	no_inferCNV_call	no_CNA_value
CID3586_CTAACTTGTCCATCCT	CID3586	4.66926	1028	502	T-cells	T cells CD8+	T_cells_c7_CD8+_IFNG	HER2+	no_gene_module	no_scTYPER_call	no_inferCNV_call	no_CNA_value
CID3586_CTAACTTTCCTAGAAC	CID3586	7.40394	1067	497	T-cells	T cells CD8+	T_cells_c7_CD8+_IFNG	HER2+	no_gene_module	no_scTYPER_call	no_inferCNV_call	no_CNA_value
CID3586_CTAATGGAGTTGCAGG	CID3586	3.97351	1057	523	T-cells	T cells CD8+	T_cells_c7_CD8+_IFNG	HER2+	no_gene_module	no_scTYPER_call	no_inferCNV_call	no_CNA_value
CID3586_CTACCCATCGGAATCT	CID3586	4.05644	1701	839	T-cells	T cells CD8+	T_cells_c7_CD8+_IFNG	HER2+	no_gene_module	no_scTYPER_call	no_inferCNV_call	no_CNA_value
CID3586_CTAGCCTAGAGTGAGA	CID3586	4.40028	1409	647	T-cells	T cells CD8+	T_cells_c7_CD8+_IFNG	HER2+	no_gene_module	no_scTYPER_call	no_inferCNV_call	no_CNA_value
CID3586_CTAGCCTTCGCCCTTA	CID3586	6.15385	1495	706	T-cells	T cells CD8+	T_cells_c7_CD8+_IFNG	HER2+	no_gene_module	no_scTYPER_call	no_inferCNV_call	no_CNA_value
CID3586_CTCACACAGCCTCGTG	CID3586	2.64112	1931	914	T-cells	T cells CD8+	T_cells_c7_CD8+_IFNG	HER2+	no_gene_module	no_scTYPER_call	no_inferCNV_call	no_CNA_value
CID3586_CTCGGGAAGAGACTTA	CID3586	3.93918	1447	760	T-cells	T cells CD8+	T_cells_c7_CD8+_IFNG	HER2+	no_gene_module	no_scTYPER_call	no_inferCNV_call	no_CNA_value
CID3586_CTCGTACTCGTGACAT	CID3586	0.671642	1340	723	T-cells	T cells CD8+	T_cells_c7_CD8+_IFNG	HER2+	no_gene_module	no_scTYPER_call	no_inferCNV_call	no_CNA_value
CID3586_CTCGTCACAAGCGAGT	CID3586	2.25225	2442	869	T-cells	T cells CD8+	T_cells_c7_CD8+_IFNG	HER2+	no_gene_module	no_scTYPER_call	no_inferCNV_call	no_CNA_value
CID3586_CTGAAACGTTCCCGAG	CID3586	3.01475	1559	695	T-cells	T cells CD8+	T_cells_c7_CD8+_IFNG	HER2+	no_gene_module	no_scTYPER_call	no_inferCNV_call	no_CNA_value
CID3586_CTGCCTATCAGTTCGA	CID3586	4.78528	815	502	T-cells	T cells CD8+	T_cells_c7_CD8+_IFNG	HER2+	no_gene_module	no_scTYPER_call	no_inferCNV_call	no_CNA_value
CID3586_CTGCGGAAGCCAGTAG	CID3586	1.59071	2326	845	T-cells	T cells CD8+	T_cells_c7_CD8+_IFNG	HER2+	no_gene_module	no_scTYPER_call	no_inferCNV_call	no_CNA_value
CID3586_CTGCTGTAGTCGATAA	CID3586	3.989	2181	877	T-cells	T cells CD8+	T_cells_c7_CD8+_IFNG	HER2+	no_gene_module	no_scTYPER_call	no_inferCNV_call	no_CNA_value
CID3586_CTGGTCTTCTGTCAAG	CID3586	2.51076	1394	688	T-cells	T cells CD8+	T_cells_c7_CD8+_IFNG	HER2+	no_gene_module	no_scTYPER_call	no_inferCNV_call	no_CNA_value
CID3586_CTGTGCTTCCCAACGG	CID3586	1.89873	1422	683	T-cells	T cells CD8+	T_cells_c7_CD8+_IFNG	HER2+	no_gene_module	no_scTYPER_call	no_inferCNV_call	no_CNA_value
CID3586_CTGTGCTTCCTAGAAC	CID3586	1.37681	1380	681	T-cells	T cells CD8+	T_cells_c7_CD8+_IFNG	HER2+	no_gene_module	no_scTYPER_call	no_inferCNV_call	no_CNA_value
CID3586_CTTACCGCACTGCCAG	CID3586	1.92666	1609	771	T-cells	T cells CD8+	T_cells_c7_CD8+_IFNG	HER2+	no_gene_module	no_scTYPER_call	no_inferCNV_call	no_CNA_value
CID3586_CTTAGGATCGACGGAA	CID3586	1.7599	1591	692	T-cells	T cells CD8+	T_cells_c7_CD8+_IFNG	HER2+	no_gene_module	no_scTYPER_call	no_inferCNV_call	no_CNA_value
CID3586_CTTCTCTCACACCGCA	CID3586	2.54065	1968	779	T-cells	T cells CD8+	T_cells_c7_CD8+_IFNG	HER2+	no_gene_module	no_scTYPER_call	no_inferCNV_call	no_CNA_value
CID3586_CTTCTCTGTACAGTGG	CID3586	6.10221	1311	612	T-cells	T cells CD8+	T_cells_c7_CD8+_IFNG	HER2+	no_gene_module	no_scTYPER_call	no_inferCNV_call	no_CNA_value
CID3586_CTTGGCTCATGGTCAT	CID3586	2.17513	1793	837	T-cells	T cells CD8+	T_cells_c7_CD8+_IFNG	HER2+	no_gene_module	no_scTYPER_call	no_inferCNV_call	no_CNA_value
CID3586_GAATAAGCATTTCAGG	CID3586	4.02269	1939	862	T-cells	T cells CD8+	T_cells_c7_CD8+_IFNG	HER2+	no_gene_module	no_scTYPER_call	no_inferCNV_call	no_CNA_value
CID3586_GACCAATGTGGCCCTA	CID3586	3.2276	1797	772	T-cells	T cells CD8+	T_cells_c7_CD8+_IFNG	HER2+	no_gene_module	no_scTYPER_call	no_inferCNV_call	no_CNA_value
CID3586_GACCAATGTTCGCTAA	CID3586	2.23285	1254	586	T-cells	T cells CD8+	T_cells_c7_CD8+_IFNG	HER2+	no_gene_module	no_scTYPER_call	no_inferCNV_call	no_CNA_value
CID3586_GACGCGTCATTTGCTT	CID3586	2.41805	1861	761	T-cells	T cells CD8+	T_cells_c7_CD8+_IFNG	HER2+	no_gene_module	no_scTYPER_call	no_inferCNV_call	no_CNA_value
CID3586_GATCGATAGGGATGGG	CID3586	1.91083	628	343	T-cells	T cells CD8+	T_cells_c7_CD8+_IFNG	HER2+	no_gene_module	no_scTYPER_call	no_inferCNV_call	no_CNA_value
CID3586_GATCGATAGGTGCACA	CID3586	5.37295	1582	661	T-cells	T cells CD8+	T_cells_c7_CD8+_IFNG	HER2+	no_gene_module	no_scTYPER_call	no_inferCNV_call	no_CNA_value
CID3586_GATCGATAGTTTCCTT	CID3586	9.80285	1826	712	T-cells	T cells CD8+	T_cells_c7_CD8+_IFNG	HER2+	no_gene_module	no_scTYPER_call	no_inferCNV_call	no_CNA_value
CID3586_GATGAAAGTTACGACT	CID3586	6.52347	1257	568	T-cells	T cells CD8+	T_cells_c7_CD8+_IFNG	HER2+	no_gene_module	no_scTYPER_call	no_inferCNV_call	no_CNA_value
CID3586_GATGAGGTCCAAACAC	CID3586	5.32972	1107	647	T-cells	T cells CD8+	T_cells_c7_CD8+_IFNG	HER2+	no_gene_module	no_scTYPER_call	no_inferCNV_call	no_CNA_value
CID3586_GATTCAGCATCTACGA	CID3586	5.27842	1724	713	T-cells	T cells CD8+	T_cells_c7_CD8+_IFNG	HER2+	no_gene_module	no_scTYPER_call	no_inferCNV_call	no_CNA_value
CID3586_GCAAACTCATCTCCCA	CID3586	1.85387	917	387	T-cells	T cells CD8+	T_cells_c7_CD8+_IFNG	HER2+	no_gene_module	no_scTYPER_call	no_inferCNV_call	no_CNA_value
CID3586_GCACATATCACTTATC	CID3586	1.86698	1714	773	T-cells	T cells CD8+	T_cells_c7_CD8+_IFNG	HER2+	no_gene_module	no_scTYPER_call	no_inferCNV_call	no_CNA_value
CID3586_GCAGTTAAGTCTCAAC	CID3586	1.18384	1436	748	T-cells	T cells CD8+	T_cells_c7_CD8+_IFNG	HER2+	no_gene_module	no_scTYPER_call	no_inferCNV_call	no_CNA_value
CID3586_GCAGTTATCGTGTAGT	CID3586	3.10651	676	386	T-cells	T cells CD8+	T_cells_c7_CD8+_IFNG	HER2+	no_gene_module	no_scTYPER_call	no_inferCNV_call	no_CNA_value
CID3586_GCCTCTAGTCGGGTCT	CID3586	4.33526	1730	740	T-cells	T cells CD8+	T_cells_c7_CD8+_IFNG	HER2+	no_gene_module	no_scTYPER_call	no_inferCNV_call	no_CNA_value
CID3586_GCGACCACACAACGTT	CID3586	7.9409	1083	520	T-cells	T cells CD8+	T_cells_c7_CD8+_IFNG	HER2+	no_gene_module	no_scTYPER_call	no_inferCNV_call	no_CNA_value
CID3586_GCGACCAGTCGAATCT	CID3586	5.85405	1247	566	T-cells	T cells CD8+	T_cells_c7_CD8+_IFNG	HER2+	no_gene_module	no_scTYPER_call	no_inferCNV_call	no_CNA_value
CID3586_GCGAGAAAGCGTGAAC	CID3586	9.62441	852	524	T-cells	T cells CD8+	T_cells_c7_CD8+_IFNG	HER2+	no_gene_module	no_scTYPER_call	no_inferCNV_call	no_CNA_value
CID3586_GCGCAGTGTGTGACCC	CID3586	1.25839	1192	607	T-cells	T cells CD8+	T_cells_c7_CD8+_IFNG	HER2+	no_gene_module	no_scTYPER_call	no_inferCNV_call	no_CNA_value
CID3586_GCGCAGTTCACCAGGC	CID3586	3.49275	1861	776	T-cells	T cells CD8+	T_cells_c7_CD8+_IFNG	HER2+	no_gene_module	no_scTYPER_call	no_inferCNV_call	no_CNA_value
CID3586_GCTGCAGCACGGTAGA	CID3586	8.65801	924	545	T-cells	T cells CD8+	T_cells_c7_CD8+_IFNG	HER2+	no_gene_module	no_scTYPER_call	no_inferCNV_call	no_CNA_value
CID3586_GCTGCAGCATGCTAGT	CID3586	6.40316	1265	606	T-cells	T cells CD8+	T_cells_c7_CD8+_IFNG	HER2+	no_gene_module	no_scTYPER_call	no_inferCNV_call	no_CNA_value
CID3586_GCTGCGATCCGTACAA	CID3586	3.47705	1438	686	T-cells	T cells CD8+	T_cells_c7_CD8+_IFNG	HER2+	no_gene_module	no_scTYPER_call	no_inferCNV_call	no_CNA_value
CID3586_GGAAAGCGTTCGTGAT	CID3586	3.14735	699	373	T-cells	T cells CD8+	T_cells_c7_CD8+_IFNG	HER2+	no_gene_module	no_scTYPER_call	no_inferCNV_call	no_CNA_value
CID3586_GGAAAGCTCAAGCCTA	CID3586	2.68562	1266	630	T-cells	T cells CD8+	T_cells_c7_CD8+_IFNG	HER2+	no_gene_module	no_scTYPER_call	no_inferCNV_call	no_CNA_value
CID3586_GGAACTTCAGAAGCAC	CID3586	2.83262	1165	543	T-cells	T cells CD8+	T_cells_c7_CD8+_IFNG	HER2+	no_gene_module	no_scTYPER_call	no_inferCNV_call	no_CNA_value
CID3586_GGACAAGAGGTACTCT	CID3586	3.24705	4404	1537	T-cells	T cells CD8+	T_cells_c7_CD8+_IFNG	HER2+	no_gene_module	no_scTYPER_call	no_inferCNV_call	no_CNA_value
CID3586_GGACAGACACATCTTT	CID3586	2.68097	746	472	T-cells	T cells CD8+	T_cells_c7_CD8+_IFNG	HER2+	no_gene_module	no_scTYPER_call	no_inferCNV_call	no_CNA_value
CID3586_GGACAGAGTCGAATCT	CID3586	9.59956	1823	818	T-cells	T cells CD8+	T_cells_c7_CD8+_IFNG	HER2+	no_gene_module	no_scTYPER_call	no_inferCNV_call	no_CNA_value
CID3586_GGACGTCCACAAGTAA	CID3586	6.08974	1872	823	T-cells	T cells CD8+	T_cells_c7_CD8+_IFNG	HER2+	no_gene_module	no_scTYPER_call	no_inferCNV_call	no_CNA_value
CID3586_GGGAATGAGGCAAAGA	CID3586	3.125	1120	585	T-cells	T cells CD8+	T_cells_c7_CD8+_IFNG	HER2+	no_gene_module	no_scTYPER_call	no_inferCNV_call	no_CNA_value
CID3586_GGGAATGCATGAACCT	CID3586	4.55373	1098	530	T-cells	T cells CD8+	T_cells_c7_CD8+_IFNG	HER2+	no_gene_module	no_scTYPER_call	no_inferCNV_call	no_CNA_value
CID3586_GGGACCTAGAGTAAGG	CID3586	3.67032	1553	739	T-cells	T cells CD8+	T_cells_c7_CD8+_IFNG	HER2+	no_gene_module	no_scTYPER_call	no_inferCNV_call	no_CNA_value
CID3586_GGGATGACAGTGACAG	CID3586	5.70533	1595	721	T-cells	T cells CD8+	T_cells_c7_CD8+_IFNG	HER2+	no_gene_module	no_scTYPER_call	no_inferCNV_call	no_CNA_value
CID3586_GGGATGATCTGTTTGT	CID3586	4.13333	1500	691	T-cells	T cells CD8+	T_cells_c7_CD8+_IFNG	HER2+	no_gene_module	no_scTYPER_call	no_inferCNV_call	no_CNA_value
CID3586_GGGCACTTCGGTTAAC	CID3586	3.6612	1830	789	T-cells	T cells CD8+	T_cells_c7_CD8+_IFNG	HER2+	no_gene_module	no_scTYPER_call	no_inferCNV_call	no_CNA_value
CID3586_GGGTCTGCAACGCACC	CID3586	3.10559	1610	778	T-cells	T cells CD8+	T_cells_c7_CD8+_IFNG	HER2+	no_gene_module	no_scTYPER_call	no_inferCNV_call	no_CNA_value
CID3586_GGGTTGCGTCCGCTGA	CID3586	4.38048	1598	645	T-cells	T cells CD8+	T_cells_c7_CD8+_IFNG	HER2+	no_gene_module	no_scTYPER_call	no_inferCNV_call	no_CNA_value
CID3586_GGTATTGGTCAATGTC	CID3586	3.53021	1473	716	T-cells	T cells CD8+	T_cells_c7_CD8+_IFNG	HER2+	no_gene_module	no_scTYPER_call	no_inferCNV_call	no_CNA_value
CID3586_GGTGAAGAGCCTATGT	CID3586	2.24467	1782	824	T-cells	T cells CD8+	T_cells_c7_CD8+_IFNG	HER2+	no_gene_module	no_scTYPER_call	no_inferCNV_call	no_CNA_value
CID3586_GGTGCGTTCCTACAGA	CID3586	3.60983	1302	578	T-cells	T cells CD8+	T_cells_c7_CD8+_IFNG	HER2+	no_gene_module	no_scTYPER_call	no_inferCNV_call	no_CNA_value
CID3586_GTACGTACAGACAAAT	CID3586	3.42824	1721	778	T-cells	T cells CD8+	T_cells_c7_CD8+_IFNG	HER2+	no_gene_module	no_scTYPER_call	no_inferCNV_call	no_CNA_value
CID3586_GTACTCCAGACTTTCG	CID3586	4.81283	1683	816	T-cells	T cells CD8+	T_cells_c7_CD8+_IFNG	HER2+	no_gene_module	no_scTYPER_call	no_inferCNV_call	no_CNA_value
CID3586_GTACTCCGTAGCCTCG	CID3586	3.30774	1693	809	T-cells	T cells CD8+	T_cells_c7_CD8+_IFNG	HER2+	no_gene_module	no_scTYPER_call	no_inferCNV_call	no_CNA_value
CID3586_GTAGGCCAGACGCAAC	CID3586	3.79867	1053	476	T-cells	T cells CD8+	T_cells_c7_CD8+_IFNG	HER2+	no_gene_module	no_scTYPER_call	no_inferCNV_call	no_CNA_value
CID3586_GTAGGCCAGTGCAAGC	CID3586	2.95639	1353	583	T-cells	T cells CD8+	T_cells_c7_CD8+_IFNG	HER2+	no_gene_module	no_scTYPER_call	no_inferCNV_call	no_CNA_value
CID3586_GTAGGCCTCAAGAAGT	CID3586	1.19149	1175	532	T-cells	T cells CD8+	T_cells_c7_CD8+_IFNG	HER2+	no_gene_module	no_scTYPER_call	no_inferCNV_call	no_CNA_value
CID3586_GTAGTCATCAACACTG	CID3586	4.56522	1840	780	T-cells	T cells CD8+	T_cells_c7_CD8+_IFNG	HER2+	no_gene_module	no_scTYPER_call	no_inferCNV_call	no_CNA_value
CID3586_GTATTCTAGCGTCAAG	CID3586	6.98847	1388	653	T-cells	T cells CD8+	T_cells_c7_CD8+_IFNG	HER2+	no_gene_module	no_scTYPER_call	no_inferCNV_call	no_CNA_value
CID3586_GTCAAGTGTATGAATG	CID3586	1.29522	2239	950	T-cells	T cells CD8+	T_cells_c7_CD8+_IFNG	HER2+	no_gene_module	no_scTYPER_call	no_inferCNV_call	no_CNA_value
CID3586_GTCAAGTTCATCTGTT	CID3586	2.35343	2422	910	T-cells	T cells CD8+	T_cells_c7_CD8+_IFNG	HER2+	no_gene_module	no_scTYPER_call	no_inferCNV_call	no_CNA_value
CID3586_GTCACAATCATCTGTT	CID3586	3.26829	2050	697	T-cells	T cells CD8+	T_cells_c7_CD8+_IFNG	HER2+	no_gene_module	no_scTYPER_call	no_inferCNV_call	no_CNA_value
CID3586_GTGCAGCCAGGGATTG	CID3586	4.54545	1474	820	T-cells	T cells CD8+	T_cells_c7_CD8+_IFNG	HER2+	no_gene_module	no_scTYPER_call	no_inferCNV_call	no_CNA_value
CID3586_GTGTGCGCAAGTTAAG	CID3586	7.9906	851	415	T-cells	T cells CD8+	T_cells_c7_CD8+_IFNG	HER2+	no_gene_module	no_scTYPER_call	no_inferCNV_call	no_CNA_value
CID3586_GTGTTAGAGCCTTGAT	CID3586	7.30671	1177	548	T-cells	T cells CD8+	T_cells_c7_CD8+_IFNG	HER2+	no_gene_module	no_scTYPER_call	no_inferCNV_call	no_CNA_value
CID3586_GTTCTCGAGAGTAAGG	CID3586	4.05268	1974	743	T-cells	T cells CD8+	T_cells_c7_CD8+_IFNG	HER2+	no_gene_module	no_scTYPER_call	no_inferCNV_call	no_CNA_value
CID3586_TAAACCGGTGACCAAG	CID3586	3.69291	1029	566	T-cells	T cells CD8+	T_cells_c7_CD8+_IFNG	HER2+	no_gene_module	no_scTYPER_call	no_inferCNV_call	no_CNA_value
CID3586_TAAGAGAAGAGCTGCA	CID3586	0.546822	1463	524	T-cells	T cells CD8+	T_cells_c7_CD8+_IFNG	HER2+	no_gene_module	no_scTYPER_call	no_inferCNV_call	no_CNA_value
CID3586_TACCTATGTTCAACCA	CID3586	4.29448	1467	667	T-cells	T cells CD8+	T_cells_c7_CD8+_IFNG	HER2+	no_gene_module	no_scTYPER_call	no_inferCNV_call	no_CNA_value
CID3586_TACGGATTCTTGTTTG	CID3586	2.54342	1612	822	T-cells	T cells CD8+	T_cells_c7_CD8+_IFNG	HER2+	no_gene_module	no_scTYPER_call	no_inferCNV_call	no_CNA_value
CID3586_TAGACCATCACAATGC	CID3586	3.1348	1276	620	T-cells	T cells CD8+	T_cells_c7_CD8+_IFNG	HER2+	no_gene_module	no_scTYPER_call	no_inferCNV_call	no_CNA_value
CID3586_TAGGCATTCCCAACGG	CID3586	3.70634	1403	631	T-cells	T cells CD8+	T_cells_c7_CD8+_IFNG	HER2+	no_gene_module	no_scTYPER_call	no_inferCNV_call	no_CNA_value
CID3586_TAGTGGTGTGGTTTCA	CID3586	2.42604	1690	762	T-cells	T cells CD8+	T_cells_c7_CD8+_IFNG	HER2+	no_gene_module	no_scTYPER_call	no_inferCNV_call	no_CNA_value
CID3586_TATCAGGAGTGACATA	CID3586	4.11932	1408	618	T-cells	T cells CD8+	T_cells_c7_CD8+_IFNG	HER2+	no_gene_module	no_scTYPER_call	no_inferCNV_call	no_CNA_value
CID3586_TCAATCTTCGCCGTGA	CID3586	3.25092	2184	850	T-cells	T cells CD8+	T_cells_c7_CD8+_IFNG	HER2+	no_gene_module	no_scTYPER_call	no_inferCNV_call	no_CNA_value
CID3586_TCACAAGGTCCGAATT	CID3586	2.59918	2193	823	T-cells	T cells CD8+	T_cells_c7_CD8+_IFNG	HER2+	no_gene_module	no_scTYPER_call	no_inferCNV_call	no_CNA_value
CID3586_TCAGATGCACATCTTT	CID3586	3.0592	2517	1041	T-cells	T cells CD8+	T_cells_c7_CD8+_IFNG	HER2+	no_gene_module	no_scTYPER_call	no_inferCNV_call	no_CNA_value
CID3586_TCAGCTCGTTGGTTTG	CID3586	2.11268	2130	812	T-cells	T cells CD8+	T_cells_c7_CD8+_IFNG	HER2+	no_gene_module	no_scTYPER_call	no_inferCNV_call	no_CNA_value
CID3586_TCATTTGGTAGCTCCG	CID3586	6.10961	1113	559	T-cells	T cells CD8+	T_cells_c7_CD8+_IFNG	HER2+	no_gene_module	no_scTYPER_call	no_inferCNV_call	no_CNA_value
CID3586_TCGCGTTAGTGTGAAT	CID3586	3.20946	1184	587	T-cells	T cells CD8+	T_cells_c7_CD8+_IFNG	HER2+	no_gene_module	no_scTYPER_call	no_inferCNV_call	no_CNA_value
CID3586_TCGCGTTTCCTGTACC	CID3586	1.3269	829	522	T-cells	T cells CD8+	T_cells_c7_CD8+_IFNG	HER2+	no_gene_module	no_scTYPER_call	no_inferCNV_call	no_CNA_value
CID3586_TCGCGTTTCTTGCATT	CID3586	3.73333	1500	639	T-cells	T cells CD8+	T_cells_c7_CD8+_IFNG	HER2+	no_gene_module	no_scTYPER_call	no_inferCNV_call	no_CNA_value
CID3586_TCGGGACCAGTCGATT	CID3586	9.05696	1071	574	T-cells	T cells CD8+	T_cells_c7_CD8+_IFNG	HER2+	no_gene_module	no_scTYPER_call	no_inferCNV_call	no_CNA_value
CID3586_TCGTACCGTCAAACTC	CID3586	1.82186	988	472	T-cells	T cells CD8+	T_cells_c7_CD8+_IFNG	HER2+	no_gene_module	no_scTYPER_call	no_inferCNV_call	no_CNA_value
CID3586_TCTCATATCTGAGGGA	CID3586	2.22222	1035	603	T-cells	T cells CD8+	T_cells_c7_CD8+_IFNG	HER2+	no_gene_module	no_scTYPER_call	no_inferCNV_call	no_CNA_value
CID3586_TCTTTCCGTCGGATCC	CID3586	4.24195	1273	764	T-cells	T cells CD8+	T_cells_c7_CD8+_IFNG	HER2+	no_gene_module	no_scTYPER_call	no_inferCNV_call	no_CNA_value
CID3586_TGAAAGAGTCACACGC	CID3586	1.75901	1137	475	T-cells	T cells CD8+	T_cells_c7_CD8+_IFNG	HER2+	no_gene_module	no_scTYPER_call	no_inferCNV_call	no_CNA_value
CID3586_TGACGGCCACTGTCGG	CID3586	3.32889	1502	685	T-cells	T cells CD8+	T_cells_c7_CD8+_IFNG	HER2+	no_gene_module	no_scTYPER_call	no_inferCNV_call	no_CNA_value
CID3586_TGACTTTAGCTAGCCC	CID3586	4.61394	1062	514	T-cells	T cells CD8+	T_cells_c7_CD8+_IFNG	HER2+	no_gene_module	no_scTYPER_call	no_inferCNV_call	no_CNA_value
CID3586_TGAGAGGGTTCCACTC	CID3586	2.47383	1051	581	T-cells	T cells CD8+	T_cells_c7_CD8+_IFNG	HER2+	no_gene_module	no_scTYPER_call	no_inferCNV_call	no_CNA_value
CID3586_TGAGCATCAATGTAAG	CID3586	5.46358	2416	1077	T-cells	T cells CD8+	T_cells_c7_CD8+_IFNG	HER2+	no_gene_module	no_scTYPER_call	no_inferCNV_call	no_CNA_value
CID3586_TGCCAAATCTTGTACT	CID3586	7.45192	832	511	T-cells	T cells CD8+	T_cells_c7_CD8+_IFNG	HER2+	no_gene_module	no_scTYPER_call	no_inferCNV_call	no_CNA_value
CID3586_TGCGTGGTCGGAATCT	CID3586	1.31148	1525	687	T-cells	T cells CD8+	T_cells_c7_CD8+_IFNG	HER2+	no_gene_module	no_scTYPER_call	no_inferCNV_call	no_CNA_value
CID3586_TGCTGCTAGAGTAAGG	CID3586	5.28022	2159	844	T-cells	T cells CD8+	T_cells_c7_CD8+_IFNG	HER2+	no_gene_module	no_scTYPER_call	no_inferCNV_call	no_CNA_value
CID3586_TGGCCAGAGATGTAAC	CID3586	4.57103	2844	1013	T-cells	T cells CD8+	T_cells_c7_CD8+_IFNG	HER2+	no_gene_module	no_scTYPER_call	no_inferCNV_call	no_CNA_value
CID3586_TGGGCGTGTTAGGGTG	CID3586	2.7912	1863	921	T-cells	T cells CD8+	T_cells_c7_CD8+_IFNG	HER2+	no_gene_module	no_scTYPER_call	no_inferCNV_call	no_CNA_value
CID3586_TGGGCGTTCGCCATAA	CID3586	5.41216	1201	558	T-cells	T cells CD8+	T_cells_c7_CD8+_IFNG	HER2+	no_gene_module	no_scTYPER_call	no_inferCNV_call	no_CNA_value
CID3586_TGGGCGTTCGTGACAT	CID3586	3.89294	822	397	T-cells	T cells CD8+	T_cells_c7_CD8+_IFNG	HER2+	no_gene_module	no_scTYPER_call	no_inferCNV_call	no_CNA_value
CID3586_TGGTTAGAGTAACCCT	CID3586	4.88272	2089	891	T-cells	T cells CD8+	T_cells_c7_CD8+_IFNG	HER2+	no_gene_module	no_scTYPER_call	no_inferCNV_call	no_CNA_value
CID3586_TGGTTCCAGCGACGTA	CID3586	1.91354	1411	724	T-cells	T cells CD8+	T_cells_c7_CD8+_IFNG	HER2+	no_gene_module	no_scTYPER_call	no_inferCNV_call	no_CNA_value
CID3586_TGTCCCATCCAACCAA	CID3586	2.44399	982	555	T-cells	T cells CD8+	T_cells_c7_CD8+_IFNG	HER2+	no_gene_module	no_scTYPER_call	no_inferCNV_call	no_CNA_value
CID3586_TTCCCAGTCTCTTATG	CID3586	4.51654	1572	681	T-cells	T cells CD8+	T_cells_c7_CD8+_IFNG	HER2+	no_gene_module	no_scTYPER_call	no_inferCNV_call	no_CNA_value
CID3586_TTCGAAGAGTCAAGCG	CID3586	6.14973	748	419	T-cells	T cells CD8+	T_cells_c7_CD8+_IFNG	HER2+	no_gene_module	no_scTYPER_call	no_inferCNV_call	no_CNA_value
CID3586_TTGACTTGTGGCCCTA	CID3586	3.05085	1770	797	T-cells	T cells CD8+	T_cells_c7_CD8+_IFNG	HER2+	no_gene_module	no_scTYPER_call	no_inferCNV_call	no_CNA_value
CID3586_TTGCCGTGTGACTACT	CID3586	2.80357	5493	1566	T-cells	T cells CD8+	T_cells_c7_CD8+_IFNG	HER2+	no_gene_module	no_scTYPER_call	no_inferCNV_call	no_CNA_value
CID3586_TTGGAACTCTTGCAAG	CID3586	2.24359	936	402	T-cells	T cells CD8+	T_cells_c7_CD8+_IFNG	HER2+	no_gene_module	no_scTYPER_call	no_inferCNV_call	no_CNA_value
CID3586_TTGGCAACAGCTCGAC	CID3586	5.32995	1182	633	T-cells	T cells CD8+	T_cells_c7_CD8+_IFNG	HER2+	no_gene_module	no_scTYPER_call	no_inferCNV_call	no_CNA_value
CID3586_TTGTAGGAGAGCCCAA	CID3586	6.76157	843	462	T-cells	T cells CD8+	T_cells_c7_CD8+_IFNG	HER2+	no_gene_module	no_scTYPER_call	no_inferCNV_call	no_CNA_value
CID3586_TTTATGCGTAGTAGTA	CID3586	4.46429	2352	788	T-cells	T cells CD8+	T_cells_c7_CD8+_IFNG	HER2+	no_gene_module	no_scTYPER_call	no_inferCNV_call	no_CNA_value
CID3586_TTTCCTCAGTTTGCGT	CID3586	1.8024	1498	691	T-cells	T cells CD8+	T_cells_c7_CD8+_IFNG	HER2+	no_gene_module	no_scTYPER_call	no_inferCNV_call	no_CNA_value
CID3586_TTTGCGCAGCTCCTTC	CID3586	4.89796	1470	721	T-cells	T cells CD8+	T_cells_c7_CD8+_IFNG	HER2+	no_gene_module	no_scTYPER_call	no_inferCNV_call	no_CNA_value
CID3586_TTTGCGCAGGATATAC	CID3586	6.04651	1290	565	T-cells	T cells CD8+	T_cells_c7_CD8+_IFNG	HER2+	no_gene_module	no_scTYPER_call	no_inferCNV_call	no_CNA_value
CID3586_AAACCTGGTCCAGTAT	CID3586	3.49144	1518	821	T-cells	T cells CD8+	T_cells_c7_CD8+_IFNG	HER2+	no_gene_module	no_scTYPER_call	no_inferCNV_call	no_CNA_value
CID3586_AACCATGAGTGTTGAA	CID3586	6.65281	1443	634	T-cells	T cells CD8+	T_cells_c7_CD8+_IFNG	HER2+	no_gene_module	no_scTYPER_call	no_inferCNV_call	no_CNA_value
CID3586_AGGGTGAGTTAAGATG	CID3586	3.03951	1316	755	T-cells	T cells CD8+	T_cells_c7_CD8+_IFNG	HER2+	no_gene_module	no_scTYPER_call	no_inferCNV_call	no_CNA_value
CID3586_GAAACTCGTCGTTGTA	CID3586	4.55675	1207	594	T-cells	T cells CD8+	T_cells_c7_CD8+_IFNG	HER2+	no_gene_module	no_scTYPER_call	no_inferCNV_call	no_CNA_value
CID3586_ACAGCTATCAAAGTAG	CID3586	2.43174	2344	857	T-cells	T cells CD8+	T_cells_c7_CD8+_IFNG	HER2+	no_gene_module	no_scTYPER_call	no_inferCNV_call	no_CNA_value
CID3586_GCGCAACGTAAGCACG	CID3586	1.28068	937	570	T-cells	T cells CD8+	T_cells_c7_CD8+_IFNG	HER2+	no_gene_module	no_scTYPER_call	no_inferCNV_call	no_CNA_value
CID3586_AACGTTGAGAAGAAGC	CID3586	5.81148	1411	672	T-cells	T cells CD8+	T_cells_c7_CD8+_IFNG	HER2+	no_gene_module	no_scTYPER_call	no_inferCNV_call	no_CNA_value
CID3586_ACGCAGCGTGCAGTAG	CID3586	7.11111	1350	594	T-cells	T cells CD8+	T_cells_c7_CD8+_IFNG	HER2+	no_gene_module	no_scTYPER_call	no_inferCNV_call	no_CNA_value
CID3586_ACTTGTTAGATCTGCT	CID3586	2.94689	3088	1176	T-cells	T cells CD8+	T_cells_c7_CD8+_IFNG	HER2+	no_gene_module	no_scTYPER_call	no_inferCNV_call	no_CNA_value
CID3586_CAAGAAATCCCGGATG	CID3586	9.17526	970	431	T-cells	T cells CD8+	T_cells_c7_CD8+_IFNG	HER2+	no_gene_module	no_scTYPER_call	no_inferCNV_call	no_CNA_value
CID3586_CCAGCGACATTCGACA	CID3586	2.4237	1114	589	T-cells	T cells CD8+	T_cells_c7_CD8+_IFNG	HER2+	no_gene_module	no_scTYPER_call	no_inferCNV_call	no_CNA_value
CID3586_CGATGTATCAGCGACC	CID3586	3.48399	2124	884	T-cells	T cells CD8+	T_cells_c7_CD8+_IFNG	HER2+	no_gene_module	no_scTYPER_call	no_inferCNV_call	no_CNA_value
CID3586_CGTGTCTTCTAACGGT	CID3586	5.15818	1454	743	T-cells	T cells CD8+	T_cells_c7_CD8+_IFNG	HER2+	no_gene_module	no_scTYPER_call	no_inferCNV_call	no_CNA_value
CID3586_GATGCTAGTGCCTTGG	CID3586	2.03327	2164	790	T-cells	T cells CD8+	T_cells_c7_CD8+_IFNG	HER2+	no_gene_module	no_scTYPER_call	no_inferCNV_call	no_CNA_value
CID3586_GCAGTTACAATAGCAA	CID3586	5.07772	1930	840	T-cells	T cells CD8+	T_cells_c7_CD8+_IFNG	HER2+	no_gene_module	no_scTYPER_call	no_inferCNV_call	no_CNA_value
CID3586_GCGCAACCATCCTAGA	CID3586	10.6029	1443	559	T-cells	T cells CD8+	T_cells_c7_CD8+_IFNG	HER2+	no_gene_module	no_scTYPER_call	no_inferCNV_call	no_CNA_value
CID3586_GCGCGATTCGCATGGC	CID3586	3.7494	4134	1283	T-cells	T cells CD8+	T_cells_c7_CD8+_IFNG	HER2+	no_gene_module	no_scTYPER_call	no_inferCNV_call	no_CNA_value
CID3586_GTACTCCAGTTAAGTG	CID3586	3.73085	1501	636	T-cells	T cells CD8+	T_cells_c7_CD8+_IFNG	HER2+	no_gene_module	no_scTYPER_call	no_inferCNV_call	no_CNA_value
CID3586_GTCGGGTTCGCGTTTC	CID3586	3.21429	1120	612	T-cells	T cells CD8+	T_cells_c7_CD8+_IFNG	HER2+	no_gene_module	no_scTYPER_call	no_inferCNV_call	no_CNA_value
CID3586_GTTCTCGGTCACTGGC	CID3586	5.25657	1598	689	T-cells	T cells CD8+	T_cells_c7_CD8+_IFNG	HER2+	no_gene_module	no_scTYPER_call	no_inferCNV_call	no_CNA_value
CID3586_TTCGGTCCACGGTGTC	CID3586	5.44148	974	596	T-cells	T cells CD8+	T_cells_c7_CD8+_IFNG	HER2+	no_gene_module	no_scTYPER_call	no_inferCNV_call	no_CNA_value
CID3586_TTTGGTTTCAGCTCTC	CID3586	2.56645	1091	598	T-cells	T cells CD8+	T_cells_c7_CD8+_IFNG	HER2+	no_gene_module	no_scTYPER_call	no_inferCNV_call	no_CNA_value
CID3586_CCACTACCACCACGTG	CID3586	2.6009	2230	893	T-cells	T cells CD8+	T_cells_c7_CD8+_IFNG	HER2+	no_gene_module	no_scTYPER_call	no_inferCNV_call	no_CNA_value
CID3586_CTCTACGCACCGTTGG	CID3586	8.78754	1798	727	T-cells	T cells CD8+	T_cells_c7_CD8+_IFNG	HER2+	no_gene_module	no_scTYPER_call	no_inferCNV_call	no_CNA_value
CID3586_CGAGCCAAGGATGGAA	CID3586	6.43623	1678	578	T-cells	T cells CD8+	T_cells_c7_CD8+_IFNG	HER2+	no_gene_module	no_scTYPER_call	no_inferCNV_call	no_CNA_value
CID3586_AACTTTCGTCATACTG	CID3586	5.28967	1588	558	T-cells	T cells CD8+	T_cells_c7_CD8+_IFNG	HER2+	no_gene_module	no_scTYPER_call	no_inferCNV_call	no_CNA_value
CID3586_GGGTCTGTCACGAAGG	CID3586	2.93269	2080	801	T-cells	T cells CD8+	T_cells_c7_CD8+_IFNG	HER2+	no_gene_module	no_scTYPER_call	no_inferCNV_call	no_CNA_value
CID3586_CAACCTCTCCAACCAA	CID3586	2.29376	2485	1015	T-cells	T cells CD8+	T_cells_c7_CD8+_IFNG	HER2+	no_gene_module	no_scTYPER_call	no_inferCNV_call	no_CNA_value
CID3586_GCGCAACAGCTGTTCA	CID3586	14.4538	1785	838	T-cells	T cells CD8+	T_cells_c7_CD8+_IFNG	HER2+	no_gene_module	no_scTYPER_call	no_inferCNV_call	no_CNA_value
CID3586_TAAGCGTAGACCACGA	CID3586	4.63277	2655	877	T-cells	T cells CD8+	T_cells_c7_CD8+_IFNG	HER2+	no_gene_module	no_scTYPER_call	no_inferCNV_call	no_CNA_value
CID3586_GCATGTACAACACCTA	CID3586	5.39084	1484	725	T-cells	T cells CD8+	T_cells_c7_CD8+_IFNG	HER2+	no_gene_module	no_scTYPER_call	no_inferCNV_call	no_CNA_value
CID3586_CGGTTAATCGATGAGG	CID3586	3.06533	1990	862	T-cells	T cells CD8+	T_cells_c7_CD8+_IFNG	HER2+	no_gene_module	no_scTYPER_call	no_inferCNV_call	no_CNA_value
CID3586_TTGGAACGTTGCCTCT	CID3586	5.16474	1123	579	T-cells	T cells CD8+	T_cells_c7_CD8+_IFNG	HER2+	no_gene_module	no_scTYPER_call	no_inferCNV_call	no_CNA_value
CID3586_AGCAGCCAGATGTGGC	CID3586	7.19132	737	393	T-cells	T cells CD8+	T_cells_c7_CD8+_IFNG	HER2+	no_gene_module	no_scTYPER_call	no_inferCNV_call	no_CNA_value
CID3586_CATATGGGTTTGGCGC	CID3586	2.97834	1108	491	T-cells	T cells CD8+	T_cells_c7_CD8+_IFNG	HER2+	no_gene_module	no_scTYPER_call	no_inferCNV_call	no_CNA_value
CID3586_GGCTGGTGTGGCAAAC	CID3586	3.79507	1054	590	T-cells	T cells CD8+	T_cells_c7_CD8+_IFNG	HER2+	no_gene_module	no_scTYPER_call	no_inferCNV_call	no_CNA_value
CID3586_TGGCCAGTCTTGCCGT	CID3586	4.2961	1513	725	T-cells	T cells CD8+	T_cells_c7_CD8+_IFNG	HER2+	no_gene_module	no_scTYPER_call	no_inferCNV_call	no_CNA_value
[truncated: 98,066 more rows]

## Sheet: B. SNN-based Results
B. Clustering results from SNN-based Louvain clustering at γ=0.4, 0.8 and 1.2.
cell.barcode	SNN gamma=0.4	SNN gamma=0.8	SNN gamma=1.2
CID3586_AAGACCTCAGCATGAG	6	9	9
CID3586_AAGGTTCGTAGTACCT	6	9	9
CID3586_ACCAGTAGTTGTGGCC	6	9	9
CID3586_ACCCACTAGATGTCGG	6	9	9
CID3586_ACTGATGGTCAACTGT	6	9	9
CID3586_ACTTGTTAGGGAAACA	6	9	9
CID3586_AGCAGCCTCCCTCTTT	6	9	9
CID3586_AGCTTGATCGGCGCTA	6	9	9
CID3586_ATCATCTAGGGATACC	6	9	9
CID3586_ATGGGAGAGGAGCGAG	6	9	9
CID3586_ATGTGTGAGTCAATAG	6	9	9
CID3586_ATTATCCGTCCTAGCG	6	9	9
CID3586_ATTGGACTCCTATTCA	6	9	9
CID3586_CAACTAGGTGTGAAAT	6	9	9
CID3586_CAAGGCCAGTGTTTGC	6	9	9
CID3586_CAAGTTGAGATGCCTT	6	9	9
CID3586_CACAGTATCTACCAGA	6	9	9
CID3586_CAGATCATCCTTTACA	6	9	9
CID3586_CAGCCGAGTTGTCGCG	6	9	9
CID3586_CAGCTAAGTAACGACG	6	9	9
CID3586_CATCCACCAGGGATTG	6	9	9
CID3586_CATTATCGTGGAAAGA	6	9	9
CID3586_CCACTACTCATAACCG	6	9	9
CID3586_CCTCTGATCAGTTAGC	6	9	9
CID3586_CCTTACGTCTACCAGA	6	9	9
CID3586_CGAGCACCACAGACTT	6	9	9
CID3586_CGCCAAGCATCAGTCA	6	9	9
CID3586_CGTGTAAGTCCGACGT	6	9	9
CID3586_CTAACTTAGTGTTGAA	6	9	9
CID3586_CTAGAGTCACAGAGGT	6	9	9
CID3586_CTGCGGAAGCTTCGCG	6	9	9
CID3586_CTTTGCGAGAGAGCTC	6	9	9
CID3586_GACGCGTTCATGTCTT	6	9	9
CID3586_GACTACAAGGCGTACA	6	9	9
CID3586_GATCGATAGTAGATGT	6	9	9
CID3586_GATCGTAGTATTACCG	6	13	16
CID3586_GATGCTACAGCATGAG	6	9	9
CID3586_GATGCTATCGGCGCTA	6	9	9
CID3586_GCAATCATCCGCATCT	6	9	9
CID3586_GGAACTTGTCTAACGT	6	9	9
CID3586_GGACAGATCGCTAGCG	6	9	9
CID3586_GTAGTCATCCACGACG	6	9	9
CID3586_GTCGGGTGTCACACGC	6	9	9
CID3586_GTGCATATCGACAGCC	6	9	9
CID3586_GTTACAGGTACAGCAG	6	9	9
CID3586_TACGGGCTCACAGGCC	6	9	9
CID3586_TACTCGCAGTTCGATC	6	9	9
CID3586_TCCCGATCACACAGAG	6	9	9
CID3586_TCGCGAGAGAAGCCCA	6	9	9
CID3586_TGACAACAGTGGACGT	6	9	9
CID3586_TGACTTTGTCTCTTTA	6	9	9
CID3586_TGACTTTTCCTTGACC	6	9	9
CID3586_TTGACTTGTGGTCTCG	6	9	9
CID3586_TTTATGCTCCCAGGTG	6	9	9
CID3586_TTTGCGCTCGCGATCG	6	9	9
CID3586_TTTGTCAGTCTTGATG	6	9	9
CID3586_ACCGTAATCGTTGACA	6	13	16
CID3586_ACTGAGTAGGTCATCT	6	9	9
CID3586_AGACGTTTCAAACGGG	6	9	9
CID3586_CAGAGAGAGGTACTCT	6	9	9
CID3586_GAACCTAAGGAATCGC	6	9	9
CID3586_GGTATTGAGCCCAATT	6	9	9
CID3586_GTTCTCGGTTCAGGCC	6	13	16
CID3586_TATTACCTCGTCTGAA	6	13	16
CID3586_TTTACTGTCTGAGTGT	6	13	16
CID3586_CTGGTCTTCGGGAGTA	6	13	16
CID3586_CAGTAACTCCTGCCAT	6	9	9
CID3586_CCGTGGACACCACGTG	6	9	16
CID3586_AACTCTTGTTCCTCCA	6	9	9
CID3586_AAGACCTGTTAAGTAG	6	13	16
CID3586_GCAAACTAGAGGGCTT	6	13	16
CID3586_TACGGATCATCGACGC	6	13	16
CID3586_TACTCATTCTCCAACC	6	9	9
CID3586_GCATGCGAGGATATAC	6	9	9
CID3586_TGGCCAGAGTCCGTAT	6	13	16
CID3586_ACAGCCGCAGGAATGC	6	13	16
CID3586_ACTGATGAGCTAGGCA	6	13	16
CID3586_TACTCATTCCACGTGG	6	9	9
CID3586_AACTCAGAGAGGGCTT	6	13	16
CID3586_AAGTCTGAGACTAGGC	6	13	16
CID3586_ACTTGTTCAGTCGATT	6	13	16
CID3586_AGCGGTCAGTCCATAC	6	13	16
CID3586_CACCTTGCATGGGACA	6	9	9
CID3586_CAGAATCTCTTACCGC	6	13	16
CID3586_CAGCTAATCTTGAGAC	6	13	16
CID3586_CAGGTGCAGCCAGTTT	6	13	16
CID3586_CATCAGACACACAGAG	6	13	16
CID3586_CCGGTAGTCACAACGT	6	13	16
CID3586_CCTTACGGTCACACGC	6	13	16
CID3586_CGCCAAGAGGACTGGT	6	13	16
CID3586_CGCGTTTGTTTGACAC	6	13	16
CID3586_CTACACCTCCAAACTG	6	13	16
CID3586_GAACCTATCGCAAGCC	6	9	9
CID3586_GACAGAGGTCTTGATG	6	13	16
CID3586_GACGGCTGTAAACACA	6	13	16
CID3586_GCCTCTAAGGAGCGAG	6	13	16
CID3586_GCTGCGAAGCGCCTCA	6	13	16
CID3586_TAGCCGGGTAGCGTCC	6	13	16
CID3586_TATCAGGAGTGCGATG	6	13	16
CID3586_TGAGAGGGTCTAAAGA	6	13	16
CID3586_TGAGCATTCTCCGGTT	6	13	16
CID3586_TTGGAACCATTAGCCA	6	13	16
CID3586_AACACGTGTGTGGTTT	6	13	16
CID3586_ACGCAGCGTCATCGGC	6	13	16
CID3586_AGGCCACAGAGTACAT	6	13	16
CID3586_AGTGGGACACAGCCCA	6	13	16
CID3586_ATTGGTGTCATCACCC	6	13	16
CID3586_CAAGATCAGTGAACAT	6	13	16
CID3586_CGGAGTCTCTGCCAGG	6	13	16
CID3586_CTACCCAGTAAACCTC	6	9	9
CID3586_GGACAGACATTCTCAT	6	13	16
CID3586_GTGCATAGTTTGTGTG	6	13	16
CID3586_GTTCGGGTCAAGAAGT	6	13	16
CID3586_TAGACCACAGGGAGAG	6	13	9
CID3586_TAGGCATCAGACACTT	6	13	16
CID3586_TATCAGGAGAAACGAG	6	13	16
CID3586_TCTTTCCAGTATCTCG	6	13	16
CID3586_AAATGCCGTATTCGTG	6	13	16
CID3586_CTGCTGTAGATGGGTC	6	13	16
CID3586_ACCAGTATCCGTCATC	6	13	16
CID3586_ACGATGTCAGCCTGTG	6	13	16
CID3586_ACTGAGTGTTGAGGTG	6	13	16
CID3586_AGGGTGAGTCTAGAGG	6	13	16
CID3586_CAGCAGCTCTAGCACA	6	13	16
CID3586_CATCCACGTGAAATCA	6	13	16
CID3586_CCTAGCTTCCAACCAA	6	13	16
CID3586_CGATGTATCCGCAGTG	6	13	16
CID3586_GAAACTCAGATATACG	6	13	16
CID3586_GTTCATTTCGTTTAGG	6	13	16
CID3586_ACAGCTAAGACGCACA	7	4	15
CID3586_ACAGCTATCGAGCCCA	7	4	15
CID3586_ACATGGTTCTTACCTA	7	4	15
CID3586_ACTGCTCCACGCGAAA	7	4	15
CID3586_ACTGTCCTCACTTCAT	7	4	15
CID3586_AGATTGCAGAGCTATA	7	4	15
CID3586_AGCGGTCGTGACTCAT	7	4	15
CID3586_ATGTGTGGTTATCCGA	7	4	15
CID3586_ATTACTCAGTGCAAGC	7	4	15
CID3586_CAACCAACAAGTCTGT	7	4	15
CID3586_CACAGGCCATCCCATC	7	4	15
CID3586_CAGGTGCTCAACACTG	7	4	15
CID3586_CATATGGTCATAGCAC	7	4	15
CID3586_CATGGCGTCCATGAAC	7	4	15
CID3586_CGATTGACATAACCTG	7	4	15
CID3586_CGCTATCCAGGCTCAC	7	4	15
CID3586_CGGAGTCTCCTGCAGG	7	4	15
CID3586_CTAAGACTCCAATGGT	7	4	15
CID3586_CTAATGGGTCGCGAAA	7	4	15
CID3586_CTCTGGTAGGTGTTAA	7	4	15
CID3586_CTGATAGGTGTTTGGT	7	4	15
CID3586_GATCTAGAGTGCGATG	7	4	15
CID3586_GCGCGATAGCCACCTG	7	4	15
CID3586_GGACATTAGCGTAGTG	7	4	15
CID3586_GGTATTGTCAACCATG	7	4	15
CID3586_GTGAAGGGTAAGTGTA	7	4	15
CID3586_TCATTACAGCTGTTCA	7	4	15
CID3586_TCTTCGGTCATTCACT	7	4	15
CID3586_TGCGTGGCACGGCTAC	7	4	15
CID3586_TTCGGTCAGAATCTCC	7	4	15
CID3586_TTGGAACTCCTGCAGG	7	4	15
CID3586_ATAGACCTCGTTACGA	7	4	15
CID3586_CAACCTCCACAGGCCT	7	4	15
CID3586_CACCTTGAGTGATCGG	7	4	15
CID3586_CATTCGCTCCGCTGTT	7	4	15
CID3586_CGACTTCAGGCAATTA	7	4	15
CID3586_CGTAGCGTCGCAAGCC	7	4	15
CID3586_CGTAGGCTCAGCACAT	7	4	15
CID3586_CGTCTACGTTACGCGC	7	4	15
CID3586_CTGATCCTCGGAATCT	7	4	15
CID3586_GAACATCCAGGCGATA	7	4	15
CID3586_GAACATCCATGAGCGA	7	4	15
CID3586_GAACCTAGTCGCGTGT	7	4	15
CID3586_GAGTCCGTCAGTGCAT	7	4	15
CID3586_GATCGCGGTCGAAAGC	7	4	15
CID3586_GATGAAAAGTGGCACA	7	4	15
CID3586_GATGCTAAGCGATTCT	7	4	15
CID3586_GATTCAGCATACCATG	7	4	15
CID3586_GGAATAACACGGCCAT	7	4	15
CID3586_GGCCGATTCGGTCTAA	7	4	15
CID3586_GTGTGCGAGGATGGTC	7	4	15
CID3586_GTGTGCGAGTAAGTAC	7	4	15
CID3586_GTTCATTCATCCCACT	7	4	15
CID3586_TAAGAGAGTGAGGGTT	7	4	15
CID3586_TACTCATTCTTCAACT	7	4	15
CID3586_TCATTTGTCGAGCCCA	7	4	15
CID3586_TCCCGATAGCAGACTG	7	4	15
CID3586_TGACAACTCTACTCAT	7	4	15
CID3586_TTCGGTCTCCGCTGTT	7	4	15
CID3586_ACAGCTACAGGACCCT	7	4	15
CID3586_ACATGGTGTCCCTACT	7	4	15
CID3586_ACTATCTAGGTGCTTT	7	4	15
CID3586_ATTTCTGCAACGATGG	7	4	15
CID3586_CTCGTCACACATTAGC	7	4	15
CID3586_CTGATAGCATTGAGCT	7	4	15
CID3586_CTTGGCTGTTCTCATT	7	4	15
CID3586_GAATGAAGTCTCCACT	7	4	15
CID3586_GGACATTGTCATCCCT	7	4	15
CID3586_GGGTTGCAGATATACG	7	4	13
CID3586_GTCGTAAAGATCACGG	7	4	15
CID3586_GACGCGTTCACTATTC	7	4	15
CID3586_TCTGAGACACTTAAGC	7	4	13
CID3586_AAAGATGCACCGTTGG	7	4	15
CID3586_ACGCAGCAGCCTATGT	7	4	15
CID3586_ACGCCGAAGCTGCCCA	7	4	15
CID3586_ACTGAACCAAGAAGAG	7	4	15
CID3586_AGCATACGTTGGTGGA	7	4	15
CID3586_AGGTCATGTAGCACGA	7	4	15
CID3586_ATAACGCCAGCTTAAC	7	4	15
CID3586_ATAGACCTCTTCGGTC	7	4	13
CID3586_ATGTGTGGTAAATGTG	7	4	15
CID3586_ATTACTCTCTGCCAGG	7	4	15
CID3586_ATTATCCTCGCCATAA	7	4	15
CID3586_CACCACTCAACGCACC	7	4	15
CID3586_CAGAGAGGTCGATTGT	7	4	15
CID3586_CATCAGACAATGGACG	7	4	15
CID3586_CATTCGCTCAAGAAGT	7	4	15
CID3586_CCCAGTTAGTGTCTCA	7	4	15
CID3586_CCGTACTCATCGTCGG	7	4	15
CID3586_CCTATTAAGTACGTAA	7	4	15
CID3586_CCTATTATCTAGCACA	7	4	15
CID3586_CCTTTCTTCCGCGCAA	7	4	15
CID3586_CGAACATCAAGGTTTC	7	4	15
CID3586_CGATGTAGTTGCGCAC	7	4	15
CID3586_CGTTGGGGTGTGTGCC	7	4	15
CID3586_CTACGTCAGATCCTGT	7	4	15
CID3586_CTAGTGAAGCCTATGT	7	4	15
CID3586_CTCATTACACATCCAA	7	4	15
CID3586_CTGAAACTCAACCATG	7	4	15
CID3586_CTGATAGAGGCAAAGA	7	4	15
CID3586_CTGCCTAGTACATCCA	7	4	15
CID3586_CTGTGCTAGGACATTA	7	4	15
CID3586_CTTGGCTTCGCAGGCT	7	4	15
CID3586_GATCGCGCATCACAAC	7	4	13
CID3586_GATCTAGAGGCTAGCA	7	4	15
CID3586_GATCTAGAGGGCTTGA	7	4	15
CID3586_GCACATATCCGAAGAG	7	4	15
CID3586_GCACTCTCAAGCCGTC	7	4	15
CID3586_GCATGCGAGTCTCCTC	7	4	15
CID3586_GCGCAGTCATCCCACT	7	4	15
CID3586_GCGCAGTGTCCCTTGT	7	4	15
CID3586_GCGCCAATCGGAGCAA	7	4	15
CID3586_GCGGGTTTCAGCTCTC	7	4	15
CID3586_GCTCTGTTCCGTTGCT	7	4	15
CID3586_GGCAATTCATGTTGAC	7	4	15
CID3586_GGCGACTTCACTATTC	7	4	15
CID3586_GGCGTGTTCCACGTTC	7	4	15
CID3586_GGGCACTAGAATTCCC	7	4	15
CID3586_GGGCATCTCCAATGGT	7	4	15
CID3586_GGTGAAGCAAACCCAT	7	4	15
CID3586_GTCACGGAGAACTGTA	7	4	15
CID3586_GTGCGGTTCCAGGGCT	7	4	15
CID3586_GTGTGCGGTCGCGTGT	7	4	15
CID3586_TACCTTACATCGTCGG	7	4	15
CID3586_TCATTTGCATTAGGCT	7	4	15
CID3586_TCGGTAAGTAGCGTAG	7	4	15
CID3586_TCGTACCAGCACACAG	7	4	15
CID3586_TCTCATAAGCGTGAAC	7	4	15
CID3586_TGAAAGAAGGTAGCTG	7	4	15
CID3586_TGAGCCGAGATCTGCT	7	4	15
CID3586_TGCTGCTAGTCAAGCG	7	4	15
CID3586_TGGCTGGGTCTAGTGT	7	4	15
CID3586_TGGTTAGTCCGAAGAG	7	4	15
CID3586_TGTCCCAAGCTACCTA	7	4	15
CID3586_TTAACTCAGATCCCAT	7	4	15
CID3586_TTCTCCTAGGGATGGG	7	4	15
CID3586_TTTACTGCACCAGTTA	7	4	15
CID3586_TTTGGTTCATGCTGGC	7	4	15
CID3586_CTAGTGAAGTGGACGT	7	4	15
CID3586_AAGACCTAGCTATGCT	7	4	15
CID3586_GCGCCAAAGGGAAACA	7	4	15
CID3586_GATTCAGGTTCCACAA	7	4	15
CID3586_TAGTTGGCACACAGAG	7	4	15
CID3586_GATGAGGCAATGGATA	7	4	15
CID3586_TTGGAACTCGTCCAGG	7	4	15
CID3586_GCGCGATCAACACCCG	7	4	15
CID3586_TGGTTAGGTTGCGTTA	7	4	15
CID3586_GTGCATATCTACCAGA	7	4	15
CID3586_TGGTTAGTCTCAAGTG	7	4	15
CID3586_TCGCGAGGTAACGACG	7	4	15
CID3586_CACCACTTCTACTCAT	7	4	13
CID3586_CTGGTCTTCTGCGACG	7	4	13
CID3586_GCAATCAAGCCCGAAA	7	4	15
CID3586_GTGCATAAGATCCGAG	7	4	13
CID3586_CAAGGCCTCCGTACAA	7	4	13
CID3586_GCGCCAAGTATATGGA	7	4	13
CID3586_AACACGTGTCGGCTCA	7	4	13
CID3586_AAGGCAGTCTTGACGA	7	4	13
CID3586_ACACTGACATACTACG	7	4	13
CID3586_ACAGCTACAGATGGGT	7	4	13
CID3586_ATCATCTTCCAGAAGG	7	4	13
CID3586_CCACTACAGTGAACGC	7	4	13
CID3586_CCCATACGTCATCCCT	7	4	13
CID3586_CGATGGCAGATCCCGC	7	4	13
CID3586_CGGTTAAGTCTCATCC	7	4	13
CID3586_CTGCCTATCGCGTAGC	7	4	13
CID3586_GACCAATTCTTTACAC	7	4	13
CID3586_GCAGCCATCTCTGCTG	7	4	13
CID3586_GCGCAGTTCTTTAGGG	7	4	13
CID3586_GCTCCTAGTATAAACG	7	4	13
CID3586_GGGACCTCAGGGATTG	7	4	13
CID3586_TGGTTAGAGCCAGTAG	7	4	13
CID3586_TGTCCCACATTGGTAC	7	4	13
CID3586_TTATGCTGTACAGTTC	7	4	13
CID3586_AGTGGGATCCGTAGTA	8	5	5
CID3586_CACAGTACACGGTGTC	8	5	5
CID3586_CATATGGCACGTCAGC	8	5	5
CID3586_CATGACATCGTCCAGG	8	5	5
CID3586_CTAATGGAGAGAGCTC	8	5	5
CID3586_GAAACTCAGCTGATAA	8	5	5
CID3586_GCGAGAACATGGATGG	8	5	5
CID3586_GTGCTTCTCACCTCGT	8	5	5
CID3586_TGGCGCAGTAAGGATT	8	5	5
CID3586_TTCTCCTTCTGAAAGA	13	17	18
CID3586_GCTGGGTAGTGTTGAA	8	5	5
CID3586_CAACCTCAGGTGGGTT	8	5	5
CID3586_CCTAGCTGTCAACTGT	8	5	5
CID3586_CGTGTCTTCTGGTGTA	8	5	5
CID3586_TCTCATAGTCATCGGC	8	5	5
CID3586_TCAGCTCGTCTTTCAT	7	4	15
CID3586_AGTAGTCAGGGTTTCT	8	5	5
CID3586_CTTAACTAGAGTACAT	8	5	5
CID3586_GAAGCAGAGCCACGCT	8	5	5
CID3586_ACGGGTCCATCGATGT	6	13	16
CID3586_CTTACCGTCCTTTCGG	6	9	9
CID3586_AAAGTAGGTGCCTGTG	6	9	9
CID3586_ACACCCTTCCGCTGTT	6	9	9
CID3586_AGGTCATCAAGACGTG	6	9	9
CID3586_CAGATCATCTGGCGAC	6	9	9
CID3586_CATGACAGTACAGTGG	6	9	9
CID3586_CCCTCCTCATCGGTTA	6	9	9
CID3586_GCATGATGTTAAGACA	6	9	9
CID3586_TTTCCTCAGGTTACCT	6	9	9
CID3586_AAAGATGCAGGGAGAG	11	11	12
CID3586_AAATGCCCATCCCATC	11	11	12
CID3586_AACTTTCAGGGCTTGA	11	11	12
CID3586_AATCCAGTCAACTCTT	11	11	12
CID3586_ACGGAGAGTGGGTATG	11	11	12
CID3586_AGCTTGAGTACAGTTC	11	11	12
CID3586_AGGGAGTAGAATCTCC	11	11	12
CID3586_ATTACTCTCAACCAAC	11	11	12
CID3586_ATTCTACGTCGCATCG	11	11	12
CID3586_CAAGATCTCATTGCCC	11	11	12
CID3586_CACACAACAAACCCAT	11	11	12
CID3586_CACAGGCAGATATGGT	11	11	12
CID3586_CACAGTAAGTGTTGAA	11	11	12
CID3586_CACCTTGAGGAGCGAG	11	11	12
CID3586_CACCTTGTCTAACGGT	11	11	12
CID3586_CAGAATCAGAAGAAGC	11	11	12
CID3586_CAGCGACTCCAGTAGT	11	11	12
CID3586_CATTATCCAGCGTTCG	11	11	12
CID3586_CATTCGCGTCCAACTA	11	11	12
CID3586_CCCTCCTTCAGGCAAG	11	11	12
CID3586_CGAACATAGGTGATTA	4	3	3
CID3586_CGATTGACATCGGACC	11	11	12
CID3586_CGATTGAGTGGTAACG	11	11	12
CID3586_CGCCAAGTCCTCAACC	11	11	12
CID3586_CGCTGGAAGCCCAACC	11	11	12
CID3586_CGGACTGAGCTAACAA	11	11	12
CID3586_CGGAGTCTCGTCACGG	11	11	12
CID3586_CTAGTGATCTGACCTC	11	11	12
CID3586_CTCGTACCAGCTGTAT	11	11	12
CID3586_CTGAAGTAGACTGGGT	11	11	12
CID3586_CTGATAGAGAGTAATC	11	11	12
CID3586_CTGATAGAGTGACTCT	11	11	12
CID3586_GAAACTCCACCAGGTC	11	11	12
CID3586_GACCAATAGGCGACAT	11	11	12
CID3586_GACTGCGCAGATCTGT	11	11	12
CID3586_GATCGCGGTGCATCTA	11	11	12
CID3586_GCAAACTCACTGTCGG	11	11	12
CID3586_GCATACACAGGGTATG	11	11	12
CID3586_GCGCAACAGGCATTGG	11	11	12
CID3586_GCTGCGAGTAAGGGCT	11	11	12
CID3586_GGCGACTTCATAACCG	11	11	12
CID3586_GGGATGATCACCATAG	11	11	12
CID3586_GGTGCGTCAATAAGCA	11	11	12
CID3586_GTAACTGCAGACTCGC	11	11	12
CID3586_GTACTTTAGAGTCTGG	11	11	12
CID3586_TAAGCGTCAAGTCTAC	11	11	12
CID3586_TACCTTAAGTTAAGTG	11	11	12
CID3586_TCAACGACAGCTCCGA	11	11	12
CID3586_TCGCGAGTCAGCTGGC	11	11	12
CID3586_TCTTTCCCAGGACCCT	11	11	12
CID3586_TGAGCCGGTAGCGTAG	11	11	12
CID3586_TGGCGCAGTAGGCATG	11	11	12
CID3586_TTCTTAGGTATAGGTA	11	11	12
CID3586_AAAGCAATCGAGCCCA	11	11	12
CID3586_AAAGTAGCAAGGCTCC	11	11	12
CID3586_AAAGTAGGTACTCAAC	11	11	12
CID3586_AAAGTAGTCATGCATG	11	11	12
CID3586_AAATGCCAGACTTTCG	11	11	12
CID3586_AACCGCGAGTACGCCC	11	11	12
CID3586_AACCGCGCATCCGGGT	11	11	12
CID3586_AACTCAGAGTTAGGTA	11	11	12
CID3586_AACTCCCCAGCTCGCA	11	11	12
CID3586_AACTGGTAGTTGCAGG	11	11	12
CID3586_AAGTCTGGTCCGTGAC	11	11	12
CID3586_AATCCAGAGTGGTCCC	11	11	12
CID3586_ACAGCCGCAGTCGTGC	11	11	12
CID3586_ACATACGGTGTAATGA	11	11	12
CID3586_ACCAGTAGTGCACCAC	11	11	12
CID3586_ACCGTAACATCACCCT	11	11	12
CID3586_ACGAGCCAGGATGGTC	11	11	12
CID3586_ACGAGCCTCGATAGAA	11	11	12
CID3586_ACGTCAAAGGTGATTA	11	11	12
CID3586_ACGTCAATCTGCAAGT	11	11	12
CID3586_ACTGAGTCAAAGTGCG	11	11	12
CID3586_ACTTACTTCACCTCGT	11	11	12
CID3586_ACTTGTTGTCAGAATA	11	11	12
CID3586_ACTTGTTGTTAAGATG	11	11	12
CID3586_AGCTCCTTCCTAAGTG	11	11	12
CID3586_AGCTCTCAGACAGGCT	11	11	12
CID3586_AGCTCTCGTTACTGAC	11	11	12
CID3586_AGCTCTCTCACCCTCA	11	11	12
CID3586_AGGCCACTCAGCGATT	11	11	12
CID3586_AGGGAGTAGGACAGAA	11	11	12
CID3586_AGGTCATAGATGTTAG	11	11	12
CID3586_AGTGTCAAGTCAAGGC	11	11	12
CID3586_ATAGACCTCGCCAAAT	11	11	12
CID3586_ATCATCTCAATGTAAG	11	11	12
CID3586_ATCATGGCAACACCCG	11	11	12
CID3586_ATCATGGCATCTCCCA	11	11	12
CID3586_ATCGAGTTCTCCCTGA	11	11	12
CID3586_ATCTGCCAGTGGTCCC	11	11	12
CID3586_ATGTGTGGTGTCGCTG	11	11	12
CID3586_ATGTGTGTCAGCTGGC	11	11	12
CID3586_ATTCTACAGGGTCGAT	11	11	12
CID3586_ATTCTACGTGCATCTA	11	11	12
CID3586_ATTGGTGCAGACTCGC	11	11	12
CID3586_ATTTCTGGTGCTAGCC	11	11	12
CID3586_CAACCTCTCTGGAGCC	11	11	12
CID3586_CAAGATCAGGCCATAG	11	11	12
CID3586_CAAGATCCAGTACACT	11	11	12
CID3586_CAAGATCGTGACCAAG	11	11	12
CID3586_CAAGGCCCAATGCCAT	11	11	12
CID3586_CAAGTTGTCCTAAGTG	11	11	12
CID3586_CACAAACCATCCTAGA	11	11	12
CID3586_CACAGTACATGGAATA	11	11	12
CID3586_CAGAGAGTCTTCATGT	11	11	12
CID3586_CAGCATAAGAGGTTGC	11	11	12
CID3586_CAGCATAAGTCCTCCT	11	11	12
CID3586_CAGCATAGTAGCACGA	11	11	12
CID3586_CAGCGACGTACAAGTA	11	11	12
CID3586_CAGCTAAGTCTCTTAT	11	11	12
CID3586_CAGCTAATCGAATCCA	11	11	12
CID3586_CATCCACCACCGGAAA	11	11	12
CID3586_CATGCCTTCATATCGG	11	11	12
CID3586_CATGGCGAGTGGGTTG	11	11	12
CID3586_CCCAGTTGTCGATTGT	11	11	12
CID3586_CCCAGTTTCTGATACG	11	11	12
CID3586_CCGTACTAGGGTTCCC	11	11	12
CID3586_CCGTGGACACACATGT	11	11	12
CID3586_CCTATTATCCGAGCCA	11	11	12
CID3586_CCTCAGTGTCAATGTC	11	11	12
CID3586_CGAACATTCACCTCGT	11	11	12
CID3586_CGACTTCAGACCACGA	11	11	12
CID3586_CGACTTCGTGCCTTGG	11	11	12
CID3586_CGATTGAGTCTAAACC	11	11	12
CID3586_CGCCAAGAGTTAAGTG	11	11	12
CID3586_CGCGTTTGTCGACTGC	11	11	12
CID3586_CGCTATCTCGAGGTAG	11	11	12
CID3586_CGGAGCTGTTCAGACT	11	11	12
CID3586_CGGTTAATCAGGCAAG	11	11	12
CID3586_CGGTTAATCTAACTGG	11	11	12
CID3586_CGTAGCGGTCAGAATA	11	11	12
CID3586_CGTCACTAGGTCGGAT	11	11	12
CID3586_CGTCACTCAAATTGCC	11	11	12
CID3586_CGTCAGGGTAAGCACG	11	11	12
CID3586_CGTCAGGGTGTTTGTG	11	11	12
CID3586_CGTTAGACATATGCTG	11	11	12
CID3586_CGTTCTGAGAAACCTA	11	11	12
CID3586_CGTTGGGCATCGACGC	11	11	12
CID3586_CTAAGACAGAAGATTC	11	11	12
CID3586_CTAAGACTCCAAACTG	11	11	12
CID3586_CTAATGGCACTATCTT	11	11	12
CID3586_CTAATGGTCGCACTCT	11	11	12
CID3586_CTACATTAGATATGCA	11	11	12
CID3586_CTAGCCTGTACTTCTT	11	11	12
CID3586_CTCATTATCGCTTAGA	11	11	12
CID3586_CTCCTAGAGCTAGGCA	11	11	12
CID3586_CTCGAAAAGAATGTTG	11	11	12
CID3586_CTCGAGGAGTTAAGTG	11	11	12
CID3586_CTCGAGGGTCTCATCC	11	11	12
CID3586_CTCGAGGTCCAGTATG	11	11	12
CID3586_CTCGGGAAGTCTCAAC	11	11	12
CID3586_CTCGTCACACCCAGTG	11	11	12
CID3586_CTCGTCATCCTTAATC	11	11	12
CID3586_CTCTACGGTGCAACTT	11	11	12
CID3586_CTGAAGTGTACCATCA	11	11	12
CID3586_CTGCCTACATCCGCGA	11	11	12
CID3586_CTTAACTGTTCGCTAA	11	11	12
CID3586_CTTTGCGCAGGGTTAG	11	11	12
CID3586_GAAATGATCAAACCAC	11	11	12
CID3586_GAACGGAGTAGCTCCG	11	11	12
CID3586_GAACGGAGTAGTACCT	11	11	12
CID3586_GAAGCAGGTGTGCGTC	11	11	12
CID3586_GACACGCGTAGCGCTC	11	11	12
CID3586_GACAGAGTCTGTCTAT	11	11	12
CID3586_GACGGCTCAATCTACG	11	11	12
CID3586_GACTAACAGATGTGTA	11	11	12
CID3586_GATCAGTGTCTTGCGG	11	11	12
CID3586_GATCGCGGTTGGTGGA	11	11	12
CID3586_GATCGTAAGGTGACCA	11	11	12
CID3586_GATGAAACAAACTGTC	11	11	12
CID3586_GATGAGGAGAAACGCC	11	11	12
CID3586_GCACATAGTGCACTTA	11	11	12
CID3586_GCATACATCATCGGAT	11	11	12
CID3586_GCATGATCAGTACACT	11	11	12
CID3586_GCATGCGCAGCTGTAT	11	11	12
CID3586_GCGACCATCCCAAGAT	11	11	12
CID3586_GCGAGAATCACCAGGC	11	11	12
CID3586_GCGCGATCACTATCTT	11	11	12
CID3586_GCGGGTTTCAGGCCCA	11	11	12
CID3586_GCTTCCACAAGTTCTG	11	11	12
CID3586_GCTTGAAAGGAGCGTT	11	11	12
CID3586_GGAACTTTCCGCGGTA	11	11	12
CID3586_GGAACTTTCTAACTCT	11	11	12
CID3586_GGACAGAAGGATGGAA	11	11	12
CID3586_GGACATTGTATATGAG	11	11	12
CID3586_GGATTACTCTGTCCGT	11	11	12
CID3586_GGGAGATTCGGCGCTA	11	11	12
CID3586_GGGATGAAGATCTGCT	11	11	12
CID3586_GGGATGATCCGGCACA	11	11	12
CID3586_GGGTCTGAGCCATCGC	11	11	12
CID3586_GGTGAAGCACCAGGTC	11	11	12
CID3586_GGTGTTAAGGGTATCG	11	11	12
CID3586_GTAACGTAGTATGACA	11	11	12
CID3586_GTAACTGAGTTGAGTA	11	11	12
CID3586_GTACGTATCTTGGGTA	11	11	12
CID3586_GTAGTCAAGTAATCCC	11	11	12
CID3586_GTCCTCAAGAGTACCG	11	11	12
CID3586_GTCGGGTTCGCCCTTA	11	11	12
CID3586_GTGAAGGTCGAATGGG	11	11	12
CID3586_GTGCATACAAGCCTAT	11	11	12
CID3586_GTGCATATCGAGCCCA	11	11	12
CID3586_GTTAAGCCACCGATAT	11	11	12
CID3586_GTTAAGCTCTTGCATT	11	11	12
CID3586_GTTCATTGTGCAGTAG	11	11	12
CID3586_GTTCGGGAGGGATGGG	11	11	12
CID3586_GTTCGGGTCACCGTAA	11	11	12
CID3586_GTTCGGGTCGTTGACA	11	11	12
CID3586_TAAGAGACAGTATAAG	11	11	12
CID3586_TAAGTGCGTCCTCCAT	11	11	12
CID3586_TACACGACAATCGGTT	11	11	12
CID3586_TACCTTAGTTGATTCG	11	11	12
CID3586_TACGGATGTAGAGGAA	11	11	12
CID3586_TACGGTATCAACCATG	11	11	12
CID3586_TACTCGCAGAGACTTA	11	11	12
CID3586_TACTCGCAGGGCTTGA	11	11	12
CID3586_TACTTACGTGGACGAT	11	11	12
CID3586_TAGACCACAGTTCATG	11	11	12
CID3586_TATCAGGTCCCTAACC	11	11	12
CID3586_TATTACCAGAGAGCTC	11	11	12
CID3586_TCAATCTTCACATGCA	11	11	12
CID3586_TCACAAGGTTCGCTAA	11	11	12
CID3586_TCAGCAACAGGGATTG	11	11	12
CID3586_TCAGGTAAGAATAGGG	11	11	12
CID3586_TCATTACGTGACGGTA	11	11	12
CID3586_TCATTTGTCACTCTTA	11	11	12
CID3586_TCGAGGCTCGATCCCT	11	11	12
CID3586_TCGCGAGTCGGCTACG	11	11	12
CID3586_TCGCGAGTCTGGCGAC	11	11	12
CID3586_TCGTAGATCATCACCC	11	11	12
CID3586_TCTCATATCCGTCATC	11	11	12
CID3586_TCTGAGAGTTACGGAG	11	11	12
CID3586_TCTTTCCTCCTATGTT	11	11	12
CID3586_TGAAAGAGTAAGCACG	11	11	12
CID3586_TGACGGCAGATCCGAG	11	11	12
CID3586_TGACGGCGTTAAGGGC	11	11	12
CID3586_TGACTTTCAGCTGGCT	11	11	12
CID3586_TGAGCATAGACTACAA	11	11	12
CID3586_TGCCAAATCGTCGTTC	11	11	12
CID3586_TGCCCTAAGTTGTAGA	11	11	12
CID3586_TGCGCAGTCAGTTTGG	11	11	12
CID3586_TGCGGGTAGGAGTAGA	11	11	12
CID3586_TGCGTGGGTTCCGTCT	11	11	12
CID3586_TGGCCAGAGACTTGAA	11	11	12
CID3586_TGGGAAGAGCTACCGC	11	11	12
CID3586_TGGTTAGTCAGGCCCA	11	11	12
CID3586_TGGTTCCAGACAGGCT	11	11	12
CID3586_TGTATTCGTTACGACT	11	11	12
CID3586_TGTTCCGGTATTAGCC	11	11	12
CID3586_TTAGGCAAGGTAGCTG	11	11	12
CID3586_TTAGGCATCTGGCGAC	11	11	12
CID3586_TTCTCCTTCCGCATCT	11	11	12
CID3586_TTGAACGGTTGCGTTA	11	11	12
CID3586_TTGAACGTCTAACTCT	11	11	12
CID3586_TTGCCGTAGCTAACAA	11	11	12
CID3586_TTGCGTCAGAGGTAGA	11	11	12
CID3586_TTGCGTCAGTGTTGAA	11	11	12
CID3586_TTTATGCAGGGCTTGA	11	11	12
CID3586_TTTCCTCTCTGTTTGT	11	11	12
CID3586_TTTGGTTTCGTACGGC	11	11	12
CID3586_ACATACGTCCTGCTTG	11	11	12
CID3586_GCGCAGTAGAGAGCTC	11	11	12
CID3586_GTGAAGGAGTGTACTC	11	11	12
CID3586_TAAGCGTGTTCCACGG	11	11	12
CID3586_TGCGTGGCAGGAATCG	11	11	12
CID3586_ATCGAGTTCCAGGGCT	11	11	12
CID3586_CAGGTGCAGAACTCGG	11	11	12
CID3586_CCATTCGAGTTACCCA	11	11	12
CID3586_CCATTCGTCCAGAGGA	11	11	12
CID3586_CGACCTTTCAATACCG	11	11	12
CID3586_GCGGGTTTCCAGTATG	11	11	12
CID3586_GGGCATCAGATGTGGC	11	11	12
CID3586_TAAACCGTCTACTTAC	11	11	12
CID3586_TTCGAAGGTCATCGGC	11	11	12
CID3586_ACGGAGAAGGGCATGT	11	11	12
CID3586_CTGCCTACATACAGCT	11	11	12
CID3586_AGCTCTCGTGTCGCTG	11	11	12
CID3586_GGGAATGAGACCGGAT	11	11	12
CID3586_TCAGATGCAATAACGA	11	11	12
CID3586_TGTATTCTCACTCTTA	11	11	12
CID3586_TGTATTCGTAGCTGCC	11	11	12
CID3586_TTGCCGTTCACTTCAT	11	11	12
CID3586_TCGGGACTCTTTCCTC	11	11	12
CID3586_TTTGGTTCATCCTTGC	11	11	12
CID3586_AAACCTGAGTTACGGG	11	11	12
CID3586_ATTTCTGCAGATCGGA	11	11	12
CID3586_CAGGTGCGTATTACCG	11	11	12
CID3586_AAAGCAAGTTAGGGTG	11	11	12
CID3586_ACGGGCTCAAGGTTCT	11	11	12
CID3586_ACTGTCCAGTTCGCGC	11	11	12
CID3586_ACTGTCCGTTAAGATG	11	11	12
CID3586_ACTTTCACATGGATGG	11	11	12
CID3586_AGATTGCAGGAATTAC	11	11	12
CID3586_CAGCTGGCACCTATCC	11	11	12
CID3586_CCCAATCTCAAGATCC	11	11	12
CID3586_CTGAAACAGCCACGCT	11	11	12
CID3586_CTGAAGTAGGATTCGG	11	11	12
CID3586_GAAATGAGTCATGCCG	11	11	12
CID3586_GACAGAGTCGTATCAG	11	11	12
CID3586_GATCGATTCATGTAGC	11	11	12
CID3586_GCAAACTGTCCTCTTG	11	11	12
CID3586_GCTCCTAGTTCACGGC	11	11	12
CID3586_GCTGCAGTCCATGAAC	11	11	12
CID3586_GCTGCTTCAAGGACTG	11	11	12
CID3586_GTGTGCGAGTGTCTCA	11	11	12
CID3586_TGAGAGGTCAAGCCTA	11	11	12
CID3586_TGAGCATTCCGATATG	11	11	12
CID3586_TGCGCAGAGATGTCGG	11	11	12
CID3586_TGTGGTAAGTGACTCT	11	11	12
CID3586_TTAACTCTCGAACTGT	11	11	12
CID3586_TTCTTAGGTGCCTGTG	11	11	12
CID3586_TTTGGTTTCGTCCAGG	11	11	12
CID3586_TTTGTCACAGTCCTTC	11	11	12
CID3586_ACCGTAATCTAACTGG	11	11	12
CID3586_CTGATAGTCACTTACT	11	11	12
CID3586_CATTCGCCACTATCTT	11	11	12
CID3586_AGGGATGTCGTTACAG	2	1	0
CID3586_CCGTACTGTGTCCTCT	2	1	0
CID3586_CCGTACTTCCTTTCTC	2	1	0
CID3586_GAAACTCAGCCTTGAT	2	1	0
CID3586_GACAGAGTCGTGGACC	2	1	0
CID3586_GATGCTATCAAACCAC	2	1	0
CID3586_GCGACCAAGTGTGGCA	2	1	0
CID3586_TCTTTCCGTCTTGTCC	2	1	0
CID3586_AAAGCAACATGCAATC	2	1	0
CID3586_AACCGCGTCGGTTCGG	2	1	7
CID3586_ACACCCTAGACACGAC	2	1	0
CID3586_ACCTTTAAGTCGTTTG	2	1	0
CID3586_ACGAGCCAGATGTAAC	2	1	0
CID3586_ACGATGTCATGTAAGA	2	1	0
CID3586_ACGGGCTAGTCCATAC	2	1	0
CID3586_ACTTACTCATCTACGA	2	1	0
CID3586_AGACGTTCAAAGGTGC	2	1	0
CID3586_AGATTGCTCTGGTGTA	2	1	7
CID3586_AGTGGGACAAGAAGAG	2	1	0
CID3586_ATGCGATTCCGTACAA	2	1	0
CID3586_ATTCTACTCAATACCG	2	1	0
CID3586_ATTTCTGTCTGGTGTA	2	1	0
CID3586_CAAGAAATCGCCTGTT	2	1	0
CID3586_CAAGGCCAGCGCTCCA	2	1	0
CID3586_CACATTTTCATTTGGG	2	1	0
CID3586_CACTCCAAGATGTTAG	2	1	0
CID3586_CAGAGAGCAAGTTGTC	2	1	0
CID3586_CAGCATAGTACTCTCC	2	1	0
CID3586_CAGCCGATCCATGAAC	2	1	0
CID3586_CAGCTGGAGGAGTTTA	2	1	0
CID3586_CATATGGAGGCAATTA	2	1	0
CID3586_CATCCACGTAAACACA	2	1	0
CID3586_CATTCGCTCACGATGT	2	1	0
CID3586_CCAATCCGTGTCGCTG	2	1	0
CID3586_CCACTACAGTTGTAGA	2	1	0
CID3586_CCCAGTTGTGTAATGA	2	1	0
CID3586_CCCTCCTCACATTTCT	2	1	0
CID3586_CCGTACTGTCAGTGGA	2	1	0
CID3586_CCTTCCCAGACCTAGG	2	1	0
CID3586_CCTTTCTTCTCGGACG	2	1	0
CID3586_CGAGCACGTGCCTGGT	2	1	0
CID3586_CGCCAAGTCCAAAGTC	2	1	0
CID3586_CGCGTTTAGGAGTTTA	2	1	0
CID3586_CGGACGTCACAGACTT	2	1	0
CID3586_CGGACTGCATTCGACA	2	1	7
CID3586_CGTAGCGAGACCCACC	2	1	0
CID3586_CGTCACTTCAAGGCTT	2	1	0
CID3586_CGTGTCTGTAGCTAAA	2	1	0
CID3586_CTAAGACCAGGCTGAA	2	1	0
CID3586_CTAAGACTCTGGTATG	2	1	0
CID3586_CTACACCTCGCGTTTC	2	1	0
CID3586_CTCGAAATCATTGCCC	2	1	0
CID3586_CTCGTACAGTGACTCT	2	1	0
CID3586_CTCGTACTCCTCAATT	2	1	0
CID3586_CTGATCCGTGCAGTAG	2	1	0
CID3586_CTGTTTAAGTTTGCGT	2	1	7
CID3586_CTTAACTAGCGCTTAT	2	1	0
CID3586_CTTCTCTTCACCATAG	2	1	7
CID3586_CTTGGCTTCTGAAAGA	2	1	0
CID3586_GAATAAGGTCTCCACT	2	1	0
CID3586_GAATAAGTCGGAAACG	2	1	0
CID3586_GACCTGGCAGCATGAG	2	1	0
CID3586_GATCGATAGTTTGCGT	2	1	0
CID3586_GATCGTAAGTCTTGCA	2	1	0
CID3586_GATGAGGGTCGGCTCA	2	1	0
CID3586_GCACATATCCACTCCA	2	1	0
CID3586_GCACTCTAGCCCTAAT	2	1	0
CID3586_GCATACATCTACTTAC	2	1	0
CID3586_GCCAAATGTTTAGCTG	2	1	0
CID3586_GCTCCTAAGTTCGATC	2	1	0
CID3586_GCTGCAGCAGATCCAT	2	1	0
CID3586_GCTGGGTCAGCTGCAC	2	1	0
CID3586_GGACATTTCGTTTATC	2	1	0
CID3586_GGCCGATAGGATATAC	2	1	0
CID3586_GGCTGGTCAATGGACG	2	1	0
CID3586_GGGAATGTCCCTGACT	2	1	0
CID3586_GGGAGATAGCACCGCT	2	1	0
CID3586_GTAGTCATCCCTTGTG	2	1	0
CID3586_GTCATTTCAAAGTGCG	2	1	0
CID3586_GTGCATAGTTTCCACC	2	1	0
CID3586_GTGTGCGCAAGGTTCT	2	1	0
CID3586_TAAGCGTCAGCCTTGG	2	1	0
CID3586_TAAGCGTTCGAACGGA	2	1	0
CID3586_TACGGATTCAGGCAAG	2	1	0
CID3586_TACTTGTGTCCGAACC	2	1	0
CID3586_TAGAGCTAGTGTGAAT	2	1	0
CID3586_TCATTACGTCTGGAGA	2	1	0
CID3586_TCGAGGCTCCGTACAA	2	1	0
CID3586_TCTTCGGGTCCCTACT	2	1	0
CID3586_TGAAAGAGTCAGGACA	2	1	0
CID3586_TGAGGGAGTGTTGGGA	2	1	0
CID3586_TGCCAAAAGATCCGAG	2	1	0
CID3586_TGCGCAGAGAACAACT	2	1	7
CID3586_TTCTACATCCTTAATC	2	1	0
CID3586_TTGAACGGTTCGAATC	2	1	0
CID3586_TTTGCGCAGACTTGAA	2	1	0
CID3586_AGTAGTCTCGAACGGA	2	1	0
CID3586_GAACGGATCCACGTTC	2	1	0
CID3586_AAAGATGAGCCGGTAA	2	1	0
CID3586_AACCGCGTCTTTACAC	2	1	0
CID3586_AACTCTTGTATTAGCC	2	1	0
CID3586_AAGTCTGTCGAGCCCA	2	1	0
CID3586_ACATGGTGTACAGACG	2	1	0
CID3586_ACCCACTAGCGAGAAA	2	1	0
CID3586_ACTATCTCATGTTCCC	2	1	0
CID3586_ACTGCTCGTAGTAGTA	2	1	0
CID3586_AGGGAGTGTAGCAAAT	2	1	7
CID3586_ATAACGCTCCAGATCA	2	1	0
CID3586_ATCCACCCACAGCCCA	2	1	0
CID3586_ATCTACTTCGGCGGTT	2	1	0
CID3586_CAGCCGATCTCCAACC	2	1	0
CID3586_CATCGGGAGGACCACA	2	1	0
CID3586_CATCGGGGTAGGGTAC	2	1	0
CID3586_CATTATCCAAGCTGTT	2	1	0
CID3586_CGAGCCAGTCTGATTG	2	1	0
CID3586_CGCTGGAAGTTAGGTA	2	1	0
CID3586_CGTCACTCAGTGAGTG	2	1	0
CID3586_CGTCAGGTCTTGAGAC	2	1	0
CID3586_CGTTAGATCAGCTGGC	2	1	0
CID3586_CTAGCCTAGGGTCTCC	2	1	0
CID3586_CTCGTCAGTTCGGGCT	2	1	0
CID3586_CTTAGGAGTCCGAACC	2	1	7
CID3586_GACCTGGAGCTACCTA	2	1	0
CID3586_GATCGCGCAATCTGCA	2	1	0
CID3586_GCCTCTAAGGATGGAA	2	1	0
CID3586_GGAATAAAGAATCTCC	2	1	0
CID3586_GGCGTGTCACGGTAGA	2	1	0
CID3586_GGGATGATCGGCCGAT	2	1	0
CID3586_GTAACGTTCGTTGCCT	2	1	0
CID3586_GTAACTGGTATTACCG	2	1	0
CID3586_TCACGAACATTCGACA	2	1	7
CID3586_TCACGAAGTGACCAAG	2	1	0
CID3586_TGGCGCAAGAGTAATC	2	1	0
CID3586_TGGGAAGGTCACACGC	2	1	7
CID3586_TTAGGCACAGCTCGCA	2	1	0
CID3586_AAATGCCCAAGCCGCT	2	1	0
CID3586_AATCCAGGTAGGAGTC	2	1	7
CID3586_ACTGAACCAGGGAGAG	2	1	0
CID3586_AGATTGCTCAGATAAG	2	1	7
CID3586_GCTGCTTGTCTAAACC	2	1	7
CID3586_ATTATCCTCAAAGACA	1	0	0
CID3586_ATTGGACGTTCGCTAA	2	1	0
CID3586_CATTCGCAGACGACGT	1	0	0
CID3586_CTCTACGCATGGTCTA	1	0	11
CID3586_GATCAGTAGGATATAC	2	1	0
CID3586_TAAGCGTGTACGCTGC	1	0	11
CID3586_GTGGGTCAGTGAACGC	2	1	0
CID3586_GGAATAATCACCATAG	2	1	0
CID3586_GACTACATCCTACAGA	2	1	7
CID3586_AACTCAGGTGGTAACG	2	1	0
CID3586_AACTCCCAGGTAAACT	2	1	0
CID3586_ACGGGCTTCCCATTTA	2	1	0
CID3586_AGTGGGACAAGCGAGT	2	1	0
CID3586_ATAGACCGTTGCTCCT	2	1	0
CID3586_CATCAAGCATTCCTGC	1	0	1
CID3586_CCAATCCTCATATCGG	1	0	1
CID3586_CGGTTAATCATCGCTC	2	1	0
CID3586_GCTGGGTAGTAGTGCG	1	0	0
CID3586_GGGCATCCATGGTCAT	1	0	1
CID3586_GGTGAAGCAAGTAATG	2	1	0
CID3586_GTGTGCGCACCACGTG	2	1	0
CID3586_TGAGCCGTCAGTGCAT	2	1	0
CID3586_TTCTCAAGTCGCATAT	1	0	1
CID3586_TTGCGTCTCGAGAGCA	1	0	0
CID3586_AAGCCGCTCGCCTGAG	5	7	11
CID3586_GCAATCAAGTGGAGTC	2	1	0
CID3586_GTGCGGTTCGGAGGTA	2	1	0
CID3586_CCTAAAGGTTGGTTTG	2	1	7
CID3586_AAGGCAGAGCCACTAT	1	0	0
CID3586_ACGGGCTTCTGATTCT	1	0	1
CID3586_ACTATCTTCCTCTAGC	1	0	1
CID3586_AGGGAGTCACCACGTG	2	1	0
CID3586_AGGGAGTTCCATGAAC	2	1	0
CID3586_ATCCGAAAGTTCGCGC	2	1	0
CID3586_ATTGGACCAGAAGCAC	1	0	1
CID3586_CACATAGAGCGTTTAC	2	1	7
CID3586_CACCTTGTCTTCATGT	2	1	7
CID3586_CATCAGAGTTACGCGC	2	1	0
CID3586_CATGACACACGAGGTA	2	1	0
CID3586_CATGGCGCAGTATCTG	1	0	1
CID3586_CATGGCGTCAGAGCTT	2	1	7
CID3586_CCATGTCGTCTTTCAT	1	0	1
CID3586_CCGGTAGCATTTCAGG	1	0	0
CID3586_CCTACCAAGGTTACCT	2	1	0
CID3586_CCTCAGTAGAGAGCTC	1	0	0
CID3586_CGATGGCAGGAATTAC	2	1	0
CID3586_CGGACACTCATCACCC	2	1	0
CID3586_CGGCTAGAGTCGCCGT	2	1	0
CID3586_CGTCTACGTCTCATCC	2	1	7
CID3586_CGTGTAACATATACGC	1	0	0
CID3586_CGTTAGATCTGTCCGT	2	1	0
CID3586_CTGTTTAGTGATGTCT	1	0	1
CID3586_CTTACCGAGCCACCTG	2	1	0
CID3586_CTTAGGATCCCATTTA	1	0	1
CID3586_GAAATGAGTAAGTGGC	2	1	0
CID3586_GAATAAGTCCTTTCTC	1	0	1
CID3586_GACGTTAAGGGATCTG	2	1	0
CID3586_GATGAGGGTGCTCTTC	2	1	0
CID3586_GCTCCTATCCGTAGTA	2	1	0
CID3586_GCTGGGTCAGTAAGAT	1	0	1
CID3586_GGTGAAGTCTGCCAGG	2	1	0
CID3586_GTAGGCCGTCACACGC	1	0	1
CID3586_GTCACGGAGGTAGCTG	2	1	0
CID3586_GTGTTAGCATGGGACA	2	1	0
CID3586_TCAGCTCAGGATATAC	2	1	0
CID3586_TCGCGTTTCACCTCGT	1	0	1
CID3586_TCGGGACGTCACTGGC	2	1	7
CID3586_TCGTACCGTCAATACC	2	1	0
CID3586_TGCGCAGGTCAACATC	2	1	0
CID3586_TGCTGCTAGCAGATCG	1	0	1
CID3586_TGTCCCAAGTTCGATC	1	0	11
CID3586_TTCTCAACAGTCCTTC	1	0	0
CID3586_AAAGATGCAGTATGCT	2	1	0
CID3586_AAATGCCTCTGAAAGA	2	1	0
CID3586_AACCGCGTCTCGCATC	2	1	0
CID3586_AACTCCCTCACTCCTG	2	1	0
CID3586_ACAGCTATCTGCGGCA	2	1	0
CID3586_ACCTTTATCGTCCAGG	2	1	0
CID3586_ACGAGCCGTAGCTGCC	2	1	0
CID3586_ACGAGCCTCATCGCTC	2	1	0
CID3586_ACGAGGATCATTATCC	2	1	0
CID3586_ACGCAGCAGCCAGGAT	2	1	0
CID3586_ACGCCAGTCCACGACG	2	1	0
CID3586_ACGGCCAAGACTACAA	2	1	0
CID3586_ACTGTCCAGATCCGAG	2	1	0
CID3586_AGCCTAACATTGTGCA	2	1	0
CID3586_AGGCCGTCAGGCGATA	2	1	7
CID3586_AGGGATGAGGCGTACA	2	1	0
CID3586_AGGGATGCATGGAATA	2	1	7
CID3586_AGGGTGAGTGTCAATC	2	1	0
CID3586_AGGTCATCAATCCGAT	2	1	0
CID3586_AGGTCCGCACCGTTGG	2	1	0
CID3586_AGTGAGGAGTGTTGAA	2	1	0
CID3586_AGTGAGGTCGCGTAGC	2	1	0
CID3586_AGTGGGATCACTGGGC	2	1	0
CID3586_ATAAGAGTCTGTGCAA	2	1	0
CID3586_ATCCACCAGAGTTGGC	2	1	0
CID3586_ATCTACTCATAAAGGT	2	1	0
CID3586_ATTATCCTCTGGCGAC	2	1	0
CID3586_ATTGGACAGTCGATAA	2	1	0
CID3586_ATTGGACGTAGGAGTC	2	1	0
CID3586_ATTGGTGGTTACTGAC	2	1	0
CID3586_CACAAACAGTGCAAGC	2	1	0
CID3586_CACACCTCATGCGCAC	2	1	0
CID3586_CACCAGGTCACCCGAG	2	1	0
CID3586_CAGCTAATCAACCAAC	2	1	0
CID3586_CATCAGATCAATCTCT	2	1	7
CID3586_CATTATCGTAGCAAAT	2	1	0
CID3586_CCACGGACATTTCACT	2	1	0
CID3586_CCATGTCGTCACACGC	2	1	0
CID3586_CCATGTCGTTACTGAC	2	1	0
CID3586_CCCAATCCAGACACTT	2	1	0
CID3586_CCCTCCTGTCTAGTCA	2	1	0
CID3586_CCTAGCTTCCGCGCAA	2	1	0
CID3586_CCTATTACATCCTTGC	2	1	0
CID3586_CCTCAGTCAGCTTCGG	2	1	0
CID3586_CGAATGTAGCTGATAA	2	1	0
CID3586_CGACTTCCATAAGACA	2	1	0
CID3586_CGATGGCTCTGTTGAG	2	1	0
CID3586_CGCGGTATCCTCATTA	2	1	0
CID3586_CGTCACTTCGGAATCT	2	1	0
CID3586_CTACACCGTCATTAGC	2	1	0
CID3586_CTACATTGTCAGAATA	2	1	0
CID3586_CTAGCCTTCGCTAGCG	2	1	0
CID3586_CTCGGGAGTTTAGGAA	2	1	0
CID3586_CTCGTACAGTCCAGGA	2	1	0
CID3586_CTCGTACGTCAATGTC	2	1	0
CID3586_CTCTACGTCACAACGT	2	1	0
CID3586_CTCTACGTCAGTGCAT	2	1	0
CID3586_CTCTGGTGTACCGTAT	2	1	0
CID3586_CTGCTGTTCAGGTAAA	2	1	0
CID3586_CTGTTTAGTGTTTGGT	2	1	0
CID3586_CTTACCGGTCGCCATG	2	1	0
CID3586_CTTTGCGAGGAGTTTA	2	1	0
CID3586_CTTTGCGTCCGCAGTG	2	1	0
CID3586_GACGGCTCACGCGAAA	2	1	0
CID3586_GACGTGCCAGCTATTG	2	1	0
CID3586_GATGCTACAGACTCGC	2	1	0
CID3586_GCAAACTTCGTCTGAA	2	1	0
CID3586_GCGCGATTCATTATCC	2	1	0
CID3586_GCTCCTAGTCCGAATT	2	1	0
CID3586_GCTTGAAGTGGCCCTA	2	1	0
CID3586_GGAAAGCGTACTTGAC	2	1	0
CID3586_GGACATTCAAGCGCTC	2	1	7
CID3586_GGATTACCAGTCTTCC	2	1	7
CID3586_GGCTCGACAGTGAGTG	2	1	0
CID3586_GGGACCTGTGCGAAAC	2	1	0
CID3586_GGGAGATTCATCGATG	2	1	0
CID3586_GGGTTGCCACGAAAGC	2	1	0
CID3586_GGTGAAGGTCGGCATC	2	1	0
CID3586_GTAACGTAGACTAGAT	2	1	0
CID3586_GTAACTGAGCTGCCCA	2	1	0
CID3586_GTAGGCCGTTGCTCCT	2	1	7
CID3586_GTATCTTCAAGCTGTT	2	1	0
CID3586_GTATCTTCAGGTTTCA	2	1	0
CID3586_GTCACAATCAACGGGA	2	1	0
CID3586_GTGAAGGGTGAGTATA	2	1	0
CID3586_GTGCTTCCACGGTAAG	2	1	0
CID3586_GTGCTTCTCTCTAAGG	2	1	7
CID3586_GTGTGCGGTCATTAGC	2	1	0
CID3586_GTTCGGGGTAATCACC	2	1	0
CID3586_GTTTCTACATCGATGT	2	1	0
CID3586_GTTTCTACATTTGCCC	2	1	0
CID3586_TACGGGCTCTGCTGTC	2	1	0
CID3586_TAGACCAGTGCCTTGG	2	1	0
CID3586_TAGAGCTAGATTACCC	2	1	0
CID3586_TAGCCGGTCCTCGCAT	2	1	0
CID3586_TAGTGGTTCGCCGTGA	2	1	7
CID3586_TAGTTGGAGCCCAACC	2	1	0
CID3586_TCACAAGGTACCGCTG	2	1	0
CID3586_TCTTCGGGTGATGCCC	2	1	0
CID3586_TGACGGCGTCCGAGTC	2	1	0
CID3586_TGACTAGCATCTCCCA	2	1	0
CID3586_TGAGGGATCGTTTAGG	2	1	0
CID3586_TGCGCAGTCTGCGTAA	2	1	0
CID3586_TGTGTTTCAGCTGTGC	2	1	0
CID3586_TTAGTTCTCTGGCGTG	2	1	0
CID3586_TTATGCTAGAACTGTA	2	1	0
CID3586_TTCGGTCTCTGGAGCC	2	1	0
CID3586_ACAGCTAGTTACGACT	2	1	0
CID3586_ACATGGTGTTGCCTCT	2	1	0
CID3586_CTGAAGTAGGCACATG	2	1	0
CID3586_AAACGGGAGCGAGAAA	2	1	0
CID3586_AAACGGGCAGGGAGAG	2	1	0
CID3586_AAACGGGGTAGGGACT	2	1	0
CID3586_AAAGCAACACGCTTTC	2	1	7
CID3586_AAATGCCGTACAGTTC	2	1	7
CID3586_AACCATGCAAATTGCC	2	1	7
CID3586_AACCATGTCATGGTCA	2	1	0
CID3586_AACCATGTCTTTCCTC	2	1	0
CID3586_AACTCCCAGCGTCAAG	2	1	7
CID3586_AACTGGTAGAATTGTG	2	1	7
CID3586_AACTGGTAGAGCCCAA	2	1	0
CID3586_AACTGGTAGTTACCCA	2	1	0
CID3586_AACTTTCTCATAACCG	2	1	0
CID3586_AAGACCTAGAAAGTGG	2	1	7
CID3586_AAGACCTAGGCTCAGA	2	1	0
CID3586_AAGGAGCAGCTGGAAC	2	1	7
CID3586_AAGGCAGAGTGGGTTG	2	1	0
CID3586_AAGGTTCAGGAATGGA	1	0	1
CID3586_AAGTCTGAGGCGACAT	2	1	0
CID3586_AATCCAGAGTTACGGG	2	1	7
CID3586_AATCCAGGTCGGCATC	2	1	0
CID3586_AATCCAGTCCAGAGGA	2	1	7
CID3586_AATCGGTGTGCAACGA	2	1	0
CID3586_ACAGCCGGTTACTGAC	2	1	7
CID3586_ACAGCCGTCTGGGCCA	2	1	7
CID3586_ACAGCTAGTCAGATAA	2	1	0
CID3586_ACAGCTAGTGACCAAG	2	1	7
CID3586_ACCAGTAAGAGGTTAT	2	1	0
CID3586_ACCTTTAGTCTAACGT	2	1	7
CID3586_ACGAGCCCATCCTTGC	2	1	0
CID3586_ACGAGGATCCGCAGTG	2	1	0
CID3586_ACGATACTCTCAACTT	2	1	7
CID3586_ACGCCGATCTTTAGGG	2	1	7
CID3586_ACGGAGACAATACGCT	2	1	7
CID3586_ACGGCCAGTGGTAACG	2	1	0
CID3586_ACTATCTAGGGAACGG	2	1	7
CID3586_ACTGAACTCATTGCGA	2	1	0
CID3586_ACTGAGTCAAGCGCTC	2	1	0
CID3586_ACTGAGTCAGTATCTG	2	1	0
CID3586_ACTGAGTGTAAGAGGA	2	1	7
CID3586_ACTGAGTGTCCTCTTG	2	1	0
CID3586_ACTGTCCAGCGTGAGT	2	1	0
CID3586_ACTGTCCTCACAATGC	2	1	0
CID3586_ACTTACTTCCGTTGCT	2	1	0
CID3586_ACTTGTTGTATGAATG	2	1	0
CID3586_ACTTGTTTCAAGGTAA	2	1	7
CID3586_ACTTTCAAGTCGAGTG	2	1	0
CID3586_ACTTTCAGTATCGCAT	2	1	7
CID3586_AGAATAGAGCAGCGTA	2	1	7
CID3586_AGAATAGCACCAGGTC	2	1	7
CID3586_AGACGTTTCACCTCGT	2	1	0
CID3586_AGAGCTTAGACTCGGA	2	1	7
CID3586_AGATCTGGTTTGACTG	2	1	7
CID3586_AGATTGCAGTGTCCAT	2	1	0
CID3586_AGCATACGTAACGCGA	2	1	7
CID3586_AGCATACTCCTCTAGC	2	1	0
CID3586_AGCCTAAAGCTGTCTA	2	1	0
CID3586_AGCCTAATCTAACGGT	2	1	0
CID3586_AGCTCCTAGTCCTCCT	2	1	7
CID3586_AGCTCTCGTAAACGCG	2	1	0
CID3586_AGCTTGAAGTCCAGGA	2	1	0
CID3586_AGCTTGACAAGTCTGT	2	1	0
CID3586_AGGCCACCACCGAATT	2	1	7
CID3586_AGGCCACGTCTAGGTT	2	1	0
CID3586_AGGGATGAGGGCTTGA	2	1	7
CID3586_AGGGTGAGTAAGGGAA	2	1	7
CID3586_AGGTCCGGTCAACATC	2	1	7
CID3586_AGTTGGTAGGTGCTAG	2	1	0
CID3586_ATAACGCGTTTGTTTC	2	1	0
CID3586_ATAGACCCACAGCCCA	2	1	0
CID3586_ATCACGATCAAACCAC	2	1	0
CID3586_ATCATCTAGGTGATTA	2	1	0
CID3586_ATCATGGAGCATCATC	2	1	0
CID3586_ATCATGGTCACGATGT	2	1	0
CID3586_ATCCACCAGTGAATTG	2	1	7
CID3586_ATCCGAATCGGTTAAC	2	1	7
CID3586_ATCTACTCAACAACCT	2	1	7
CID3586_ATCTACTCAGGCGATA	2	1	0
CID3586_ATCTACTGTTCGGCAC	2	1	0
CID3586_ATCTGCCGTGTTGAGG	2	1	0
CID3586_ATGAGGGAGCGATTCT	2	1	7
CID3586_ATGAGGGAGGGAAACA	2	1	0
CID3586_ATGAGGGCATGCCTTC	2	1	0
CID3586_ATGGGAGGTGACGCCT	2	1	0
CID3586_ATGTGTGTCACGGTTA	2	1	0
CID3586_ATGTGTGTCGGAAACG	2	1	7
CID3586_ATTCTACGTCTTTCAT	2	1	7
CID3586_ATTCTACGTTCTCATT	2	1	7
CID3586_ATTGGACGTAAAGTCA	2	1	7
CID3586_ATTGGTGTCTGGTTCC	2	1	0
CID3586_CAACCAACAAGACGTG	2	1	0
CID3586_CAACCAAGTGTTGGGA	2	1	7
CID3586_CAACTAGAGTCACGCC	2	1	0
CID3586_CAAGAAATCTGTTGAG	2	1	0
CID3586_CAAGATCGTCTTGCGG	2	1	7
CID3586_CAAGATCTCTGTCTAT	2	1	7
CID3586_CACACCTCACTGAAGG	2	1	0
CID3586_CACATAGCACGACGAA	2	1	0
CID3586_CACATAGGTAAGTGTA	2	1	7
CID3586_CACATTTCACACTGCG	2	1	0
CID3586_CACCACTAGAAGATTC	2	1	7
CID3586_CACCAGGAGATCGATA	2	1	0
CID3586_CACCAGGGTCGACTAT	2	1	0
CID3586_CACCTTGAGGTAAACT	2	1	0
CID3586_CACCTTGTCCGGCACA	2	1	7
CID3586_CACTCCAAGAACAATC	2	1	0
CID3586_CACTCCAAGACTACAA	2	1	0
CID3586_CACTCCAGTCAATGTC	2	1	7
CID3586_CACTCCAGTCAGAGGT	2	1	0
CID3586_CAGATCACACACAGAG	2	1	7
CID3586_CAGATCATCGCCGTGA	2	1	0
CID3586_CAGCATACAGCGTTCG	2	1	7
CID3586_CAGCATAGTCCCTACT	2	1	7
CID3586_CAGCTAATCATGCATG	2	1	0
CID3586_CAGCTAATCCATTCTA	2	1	0
CID3586_CAGCTGGAGCGTTGCC	2	1	0
CID3586_CAGCTGGTCTGTCAAG	2	1	7
CID3586_CATCAGAGTTCCATGA	2	1	0
CID3586_CATCCACGTGCAGGTA	2	1	7
CID3586_CATCCACTCGTTGCCT	2	1	0
CID3586_CATCGAAAGCCATCGC	2	1	0
CID3586_CATGCCTAGAGGTTGC	2	1	0
CID3586_CATGGCGCAAGAAAGG	2	1	0
CID3586_CATGGCGCATTATCTC	2	1	0
CID3586_CATTATCAGAATTCCC	2	1	0
CID3586_CCAATCCAGTACGATA	2	1	0
CID3586_CCAATCCGTAGCACGA	2	1	0
CID3586_CCACCTAAGCTAGGCA	2	1	0
CID3586_CCACGGAAGCCTATGT	2	1	0
CID3586_CCACGGACATGGGAAC	2	1	0
CID3586_CCACTACAGGCAGGTT	2	1	0
CID3586_CCATGTCAGCACAGGT	2	1	0
CID3586_CCATGTCGTGCAACTT	2	1	7
CID3586_CCATGTCTCGGTCTAA	2	1	0
CID3586_CCGGGATTCGTATCAG	2	1	0
CID3586_CCGTACTCACGTTGGC	2	1	0
CID3586_CCTAAAGCACGGTGTC	2	1	0
CID3586_CCTAAAGTCCACGACG	2	1	0
CID3586_CCTACCACAAAGGCGT	2	1	0
CID3586_CCTACCAGTCAATACC	2	1	0
CID3586_CCTAGCTGTCAACATC	2	1	0
CID3586_CCTAGCTGTTCTGGTA	2	1	7
CID3586_CCTATTAAGAAGAAGC	2	1	0
CID3586_CCTTACGAGTGGACGT	12	16	7
CID3586_CCTTACGAGTTAACGA	2	1	0
CID3586_CCTTACGTCGGAAATA	2	1	0
CID3586_CCTTCGAAGCAATCTC	2	1	7
CID3586_CGAACATAGATGTAAC	2	1	0
CID3586_CGAACATAGCTGAAAT	2	1	0
CID3586_CGAACATCACTTAACG	2	1	7
CID3586_CGAATGTCACATGACT	2	1	7
CID3586_CGACCTTCAGCTCGCA	2	1	0
CID3586_CGACCTTCAGGAATCG	2	1	0
CID3586_CGACCTTGTTACGCGC	2	1	7
CID3586_CGACCTTTCTAACTCT	2	1	7
CID3586_CGAGAAGGTTCTGTTT	2	1	0
CID3586_CGAGAAGTCTGCAGTA	2	1	7
CID3586_CGAGCACGTTTGTTTC	2	1	0
CID3586_CGATCGGAGTCCAGGA	2	1	0
CID3586_CGATCGGCAAAGGCGT	2	1	7
CID3586_CGATCGGGTCTAGTCA	2	1	7
CID3586_CGATGGCTCAGTCCCT	2	1	7
CID3586_CGATGGCTCCGCAGTG	2	1	7
CID3586_CGCCAAGCAAGTCTGT	2	1	0
CID3586_CGCGGTAGTTCGCGAC	2	1	7
CID3586_CGCGTTTAGCCTATGT	2	1	0
CID3586_CGCTATCTCAGAAATG	2	1	0
CID3586_CGCTATCTCGGAGGTA	2	1	7
CID3586_CGCTGGAGTCCGAACC	2	1	7
CID3586_CGCTTCACAGGTCTCG	2	1	0
CID3586_CGCTTCAGTTCCATGA	2	1	7
CID3586_CGCTTCATCGTTTGCC	2	1	7
CID3586_CGGACACAGATCCTGT	2	1	7
CID3586_CGGACACAGCGTGTCC	2	1	7
CID3586_CGGAGCTCATCACCCT	2	1	0
CID3586_CGGAGTCCAAGCCGCT	2	1	7
CID3586_CGTAGCGAGAATGTGT	2	1	0
CID3586_CGTCACTAGCGCTCCA	2	1	0
CID3586_CGTCACTTCGGATGTT	2	1	0
CID3586_CGTGAGCCAACACGCC	2	1	0
CID3586_CGTGTAAAGGGAAACA	2	1	0
CID3586_CGTTAGAAGAAACCGC	2	1	0
CID3586_CGTTAGAGTGGACGAT	2	1	7
CID3586_CGTTCTGAGGTTCCTA	2	1	0
CID3586_CGTTGGGTCCCGGATG	2	1	7
CID3586_CTAAGACTCAATCACG	2	1	7
CID3586_CTACACCTCTCGATGA	2	1	7
CID3586_CTACCCAGTGGCAAAC	2	1	0
CID3586_CTACGTCCAGCATGAG	2	1	0
CID3586_CTAGAGTAGGGTTCCC	2	1	7
CID3586_CTAGAGTGTCCTGCTT	2	1	0
CID3586_CTAGCCTCAAGCCATT	2	1	7
CID3586_CTCACACTCTAACGGT	2	1	0
CID3586_CTCAGAAAGCTATGCT	2	1	7
CID3586_CTCATTAGTGGTGTAG	2	1	0
CID3586_CTCCTAGGTCTAGTGT	2	1	7
CID3586_CTCGAAATCGGAGGTA	1	1	0
CID3586_CTCGAGGAGAGTGAGA	2	1	7
CID3586_CTCGGAGTCTTGGGTA	2	1	0
CID3586_CTCGGGAAGCGATTCT	2	1	7
CID3586_CTCGTACGTCTCTCTG	2	1	7
CID3586_CTCTGGTCACTATCTT	2	1	0
CID3586_CTCTGGTGTTCGCTAA	2	1	7
CID3586_CTGAAGTGTTAGAACA	2	1	0
CID3586_CTGATCCGTGCCTGCA	2	1	0
CID3586_CTGATCCTCACTTACT	2	1	0
CID3586_CTGATCCTCTTTAGTC	2	1	0
CID3586_CTGCGGAAGCACACAG	2	1	0
CID3586_CTGGTCTTCAGTTAGC	2	1	7
CID3586_CTGTGCTGTCTAGTGT	2	1	0
CID3586_CTGTTTAAGTCAATAG	2	1	7
CID3586_CTTAACTTCTAACTTC	2	1	0
CID3586_GAAACTCGTGAGGGTT	2	1	0
CID3586_GAAATGAGTAGGCATG	2	1	7
CID3586_GAACATCAGATCTGAA	2	1	7
CID3586_GAACCTAGTCGAACAG	2	1	0
CID3586_GAAGCAGCAGCGAACA	2	1	7
CID3586_GAATAAGCAGGGATTG	2	1	0
CID3586_GAATAAGCATTGGTAC	2	1	7
CID3586_GAATAAGGTCACCCAG	2	1	0
CID3586_GAATGAATCGCCATAA	2	1	7
CID3586_GACCAATTCAAGATCC	2	1	0
CID3586_GACCTGGTCTTGTTTG	2	1	7
CID3586_GACTGCGAGCGTCTAT	2	1	0
CID3586_GAGCAGAAGTCTCCTC	2	1	0
CID3586_GAGCAGAGTCCAAGTT	2	1	7
CID3586_GAGGTGAGTATCGCAT	2	1	7
CID3586_GATCGCGGTTGTGGCC	2	1	7
CID3586_GATGAAAAGTGCGATG	2	1	7
CID3586_GATGAAAGTCACAAGG	2	1	0
CID3586_GATGAAAGTTTAGCTG	2	1	0
CID3586_GATGAGGAGAGACTTA	2	1	7
CID3586_GATGAGGGTCATCCCT	2	1	0
CID3586_GATGCTAAGTTGTCGT	2	1	0
CID3586_GCAATCAGTACCGAGA	2	1	0
CID3586_GCACATATCGCCGTGA	2	1	7
CID3586_GCACTCTTCAATACCG	2	1	7
CID3586_GCAGCCAGTCAACATC	2	1	0
CID3586_GCAGTTAAGCCACGTC	2	1	7
CID3586_GCAGTTAAGCGTTTAC	2	1	0
CID3586_GCATACACACCAGATT	2	1	7
CID3586_GCATGCGCACAAGACG	2	1	7
CID3586_GCATGCGCATTGCGGC	2	1	0
CID3586_GCATGCGGTTGATTCG	2	1	0
CID3586_GCATGTAGTGAAGGCT	2	1	7
CID3586_GCATGTAGTTTCGCTC	2	1	0
CID3586_GCCAAATTCTTTAGGG	2	1	7
CID3586_GCCTCTAAGCTGGAAC	2	1	7
CID3586_GCGACCAAGTGGGTTG	2	1	7
CID3586_GCGACCACAAAGTGCG	2	1	0
CID3586_GCGACCAGTACTCAAC	2	1	0
CID3586_GCGAGAAAGCAGCGTA	2	1	0
CID3586_GCGAGAATCTACTTAC	2	1	0
CID3586_GCGCAACAGAAACCGC	2	1	0
CID3586_GCGCAGTTCAGCTTAG	2	1	7
CID3586_GCGGGTTGTAAGTGGC	2	1	0
CID3586_GCTGCGACAGCCAATT	2	1	0
CID3586_GCTGGGTAGCCAGTAG	2	1	7
CID3586_GCTTCCAGTGTGAAAT	2	1	0
CID3586_GCTTGAAAGATGCCTT	2	1	0
CID3586_GGAACTTCATGGAATA	2	1	0
CID3586_GGAATAACAAAGAATC	2	1	0
CID3586_GGACAAGGTTAGGGTG	2	1	0
CID3586_GGACATTTCGGAGCAA	2	1	0
CID3586_GGACGTCCACATAACC	2	1	0
CID3586_GGAGCAAGTTTCGCTC	2	1	0
CID3586_GGAGCAATCCTATGTT	2	1	7
CID3586_GGATGTTTCAGCGACC	2	1	7
CID3586_GGCAATTAGCTGATAA	2	1	0
CID3586_GGCTGGTAGCACGCCT	2	1	7
CID3586_GGCTGGTAGCCAGGAT	2	1	7
CID3586_GGGAATGGTGAAATCA	2	1	0
CID3586_GGGAATGGTGTGCCTG	2	1	0
CID3586_GGGAGATAGACAGAGA	2	1	0
CID3586_GGGAGATGTGCCTGCA	2	1	0
CID3586_GGGATGAGTAAAGTCA	2	1	7
CID3586_GGGCACTCATGCATGT	2	1	0
CID3586_GGGTCTGTCTTCAACT	2	1	0
CID3586_GGGTTGCCAGTGGGAT	2	1	0
CID3586_GGTATTGTCCCTTGCA	2	1	0
CID3586_GGTGAAGAGCAATATG	2	1	0
CID3586_GGTGTTAAGTTGAGAT	2	1	0
CID3586_GGTGTTATCCGTTGTC	2	1	7
CID3586_GTAACGTAGCTATGCT	2	1	0
CID3586_GTAACGTCATCAGTCA	2	1	0
CID3586_GTAACGTTCATAACCG	2	1	0
CID3586_GTACTCCGTCAGAGGT	2	1	0
CID3586_GTACTTTCAAAGGAAG	2	1	0
CID3586_GTAGGCCAGGCATGGT	2	1	0
CID3586_GTAGTCACACCGTTGG	2	1	7
CID3586_GTATCTTTCCTACAGA	2	1	7
CID3586_GTATCTTTCCTGTACC	2	1	7
CID3586_GTCAAGTAGAGGTAGA	2	1	0
CID3586_GTCACAAAGAAGGTTT	2	1	0
CID3586_GTCACGGTCATCGGAT	2	1	0
CID3586_GTCCTCAGTAGTGAAT	2	1	0
CID3586_GTCGGGTGTGCCTGTG	2	1	0
CID3586_GTCTCGTAGTGAAGTT	2	1	0
CID3586_GTGCAGCGTCCCGACA	2	1	7
CID3586_GTGCATAAGTCGAGTG	2	1	0
CID3586_GTGCTTCGTTGGTGGA	2	1	7
CID3586_GTGGGTCAGTGACTCT	2	1	0
CID3586_GTTAAGCTCCGTAGTA	2	1	0
CID3586_GTTACAGGTCTCTTTA	2	1	0
CID3586_GTTACAGGTGTAACGG	2	1	0
CID3586_GTTCATTGTCTGCAAT	2	1	0
CID3586_GTTCGGGAGGAGTCTG	2	1	0
CID3586_GTTCGGGTCGCTGATA	2	1	0
CID3586_GTTCTCGTCTGCTTGC	2	1	0
CID3586_TAAACCGAGACTACAA	2	1	0
CID3586_TAAACCGCATGGTCTA	2	1	7
CID3586_TAAGAGAGTGTATGGG	2	1	7
CID3586_TAAGAGATCTATGTGG	2	1	0
CID3586_TAAGCGTAGAACTCGG	2	1	0
CID3586_TAAGCGTAGAGTACAT	2	1	0
CID3586_TAAGCGTTCGGAGGTA	2	1	7
CID3586_TACACGAGTCGGCACT	2	1	0
CID3586_TACACGAGTCTAGAGG	2	1	7
CID3586_TACAGTGCAAATACAG	2	1	0
CID3586_TACCTATCAAGGTTCT	2	1	0
CID3586_TACCTTAGTAGCTAAA	2	1	0
CID3586_TACGGATCACCTATCC	2	1	7
CID3586_TACGGGCGTAAGCACG	2	1	7
CID3586_TACGGGCTCGTGGTCG	2	1	0
CID3586_TACGGTAGTGGTACAG	2	1	0
CID3586_TACGGTATCACATAGC	2	1	7
CID3586_TACTCATTCTGCCAGG	2	1	0
CID3586_TACTCGCCAATCGGTT	2	1	0
CID3586_TACTCGCTCGACGGAA	2	1	0
CID3586_TACTTACGTCATCGGC	2	1	7
CID3586_TACTTACGTCCGAGTC	2	1	7
CID3586_TAGAGCTAGCGTAATA	2	1	7
CID3586_TAGAGCTAGGCTCAGA	2	1	0
CID3586_TAGGCATAGACCGGAT	2	1	0
CID3586_TAGGCATAGGTGATAT	2	1	0
CID3586_TAGGCATCACGAGGTA	2	1	0
CID3586_TAGTGGTTCTCGCTTG	2	1	7
CID3586_TAGTTGGAGCCAGAAC	2	1	0
CID3586_TAGTTGGGTGCTCTTC	2	1	0
CID3586_TATCAGGCATTGAGCT	2	1	7
CID3586_TATCAGGGTAGCGCAA	2	1	0
CID3586_TATCAGGGTCTGCGGT	2	1	0
CID3586_TATCTCACATTCTCAT	2	1	7
CID3586_TATTACCAGCTAGCCC	2	1	0
CID3586_TATTACCTCTAGAGTC	2	1	0
CID3586_TCAACGAAGAAACGCC	2	1	7
CID3586_TCAATCTCAGACACTT	2	1	0
CID3586_TCAATCTGTGCGAAAC	2	1	0
CID3586_TCAATCTTCTGGCGAC	2	1	0
CID3586_TCACAAGTCGTAGATC	2	1	0
CID3586_TCAGATGGTTGGTAAA	2	1	7
CID3586_TCAGCAAAGTTCGCGC	2	1	0
CID3586_TCAGGATAGAAACCTA	2	1	0
CID3586_TCAGGTACACCAGTTA	2	1	7
CID3586_TCATTTGCACCACGTG	2	1	7
CID3586_TCCACACAGCGTAATA	2	1	0
CID3586_TCGAGGCGTTGAACTC	2	1	0
CID3586_TCGTACCTCACAGTAC	2	1	7
CID3586_TCTCATATCCACGCAG	2	1	0
CID3586_TCTCTAAGTGCGCTTG	2	1	0
CID3586_TCTGAGAAGCCGCCTA	2	1	0
CID3586_TGAAAGATCTTTACGT	2	1	0
CID3586_TGACTAGGTTAAAGAC	2	1	7
CID3586_TGACTAGTCACCGTAA	2	1	0
CID3586_TGACTTTTCATCGGAT	2	1	0
CID3586_TGAGCCGAGAGGTACC	2	1	0
CID3586_TGATTTCGTTACGACT	2	1	0
CID3586_TGCACCTGTGAGTGAC	2	1	7
CID3586_TGCCCATGTCTGGTCG	2	1	0
CID3586_TGCCCATGTTTGTGTG	2	1	7
CID3586_TGCCCTAAGCCCTAAT	2	1	0
CID3586_TGCCCTAAGTGGTAAT	2	1	7
CID3586_TGCCCTAGTATGAAAC	2	1	7
CID3586_TGCCCTATCAATACCG	2	1	0
CID3586_TGCGCAGTCTGCTGTC	2	1	0
CID3586_TGCGTGGGTCCGACGT	2	1	0
CID3586_TGCTGCTGTGTTTGTG	2	1	0
CID3586_TGGACGCTCGCCCTTA	2	1	0
CID3586_TGGCCAGGTCGCATCG	2	1	7
CID3586_TGGCCAGTCATTGCCC	2	1	7
CID3586_TGGCGCAAGAAGGCCT	2	1	7
CID3586_TGGCGCAAGCCCTAAT	2	1	0
CID3586_TGGGCGTAGACAGAGA	2	1	0
CID3586_TGTATTCAGACCTTTG	2	1	0
CID3586_TGTATTCAGTTTCCTT	2	1	0
CID3586_TGTCCCACACTAAGTC	2	1	0
CID3586_TGTGGTAAGTCTCAAC	2	1	0
CID3586_TGTGGTATCCGCAGTG	2	1	7
CID3586_TGTGTTTAGTGGACGT	2	1	0
CID3586_TTAACTCCAATGAATG	2	1	0
CID3586_TTAACTCCAGATCGGA	2	1	7
CID3586_TTAGGACGTGCATCTA	2	1	7
CID3586_TTCTACACATGAACCT	2	1	7
CID3586_TTCTCAAGTCAAAGCG	2	1	0
CID3586_TTCTCAATCTGCCAGG	2	1	0
CID3586_TTCTCCTAGCGTTGCC	2	1	7
CID3586_TTCTCCTCACAAGACG	2	1	7
CID3586_TTCTCCTGTCTCTTTA	2	1	0
CID3586_TTCTCCTTCCCTTGTG	2	1	0
CID3586_TTCTTAGTCTTGCCGT	2	1	0
CID3586_TTGACTTAGCCGCCTA	2	1	7
CID3586_TTGACTTTCATTATCC	2	1	7
CID3586_TTGGAACAGATACACA	2	1	0
CID3586_TTGTAGGCAGCATGAG	2	1	7
CID3586_TTGTAGGGTTGGAGGT	2	1	7
CID3586_TTTACTGAGCTTATCG	2	1	7
CID3586_TTTATGCAGCGGCTTC	2	1	7
CID3586_TTTATGCTCTGTCTAT	2	1	0
CID3586_TTTGCGCAGTCCCACG	2	1	0
CID3586_TTTGCGCGTATAAACG	2	1	0
CID3586_TTTGTCAAGTCTCCTC	2	1	7
CID3586_ACGAGGAGTGTGGTTT	2	1	0
CID3586_CGAGAAGGTACGCACC	2	1	7
CID3586_CTCACACCATGTCGAT	2	1	7
CID3586_GAACATCTCAGTTAGC	2	1	0
CID3586_GACACGCAGCTAGTCT	2	1	7
CID3586_GCGGGTTGTTAAGAAC	2	1	0
CID3586_GCTGCTTGTTCGTTGA	2	1	7
CID3586_TACACGACAATGACCT	2	1	7
CID3586_ACATGGTGTTCTGGTA	2	1	0
CID3586_ACGGAGATCTGCAGTA	2	1	7
CID3586_ACTTTCATCGCTTAGA	2	1	7
CID3586_CACAGGCGTCTCACCT	1	0	0
CID3586_CCACCTAAGTGCGATG	2	1	0
CID3586_CCCATACCAAACTGCT	1	0	11
CID3586_CGTCACTCATACAGCT	1	0	11
CID3586_CTCAGAAAGTTAACGA	2	1	0
CID3586_GATCGATTCACTTCAT	2	1	0
CID3586_GCTTCCACACATGGGA	2	0	0
CID3586_GGCAATTGTGCCTGGT	2	1	0
CID3586_GTGCAGCTCATGTCTT	2	1	0
CID3586_GTTCGGGTCTACTATC	2	1	0
CID3586_TACGGATAGTCTCGGC	2	1	0
CID3586_TAGTGGTCAGTCAGCC	1	0	0
CID3586_TCACGAAAGAGGGATA	2	1	0
CID3586_TGCGTGGTCACGGTTA	2	1	7
CID3586_TGGCGCATCACGACTA	1	0	1
CID3586_TTGAACGAGTGTGAAT	2	1	0
CID3586_AACCGCGCATGCTAGT	2	1	0
CID3586_AACTTTCTCTCTAGGA	2	1	0
CID3586_ACAGCTAAGCCACTAT	2	1	0
CID3586_CAAGTTGCAGCTGCAC	2	1	0
CID3586_CACAAACAGAGACTTA	2	1	0
CID3586_CCTTCCCCACCCATGG	2	1	0
CID3586_CGGTTAATCAAAGTAG	2	1	0
CID3586_CTCACACAGCGTGTCC	2	1	0
CID3586_CTCCTAGTCACTATTC	2	1	0
CID3586_GACGCGTTCCGTTGCT	2	1	0
CID3586_GATGAGGCAACACCTA	2	1	0
CID3586_GATTCAGCACGTCAGC	2	1	0
CID3586_GCACTCTTCGTCACGG	2	1	0
CID3586_GCTGCAGTCCGAACGC	2	1	0
CID3586_GGAACTTAGCGTTGCC	2	1	0
CID3586_GGCAATTCACAGGCCT	2	1	0
CID3586_GGCGTGTGTATTCTCT	2	1	0
CID3586_TACTTACAGCTAGCCC	2	1	7
CID3586_TTCGGTCTCCGCGCAA	2	1	0
CID3586_TTCTCAAGTAGCGCAA	2	1	0
CID3586_TTTATGCAGGGTATCG	2	1	0
CID3586_TTTCCTCCATCACGAT	2	1	0
CID3586_ACACCGGAGTAGTGCG	1	1	11
CID3586_ACAGCTAAGCTATGCT	2	1	0
CID3586_ACGGAGAGTGCGCTTG	2	1	7
CID3586_ACTTGTTTCCTCAATT	2	1	0
CID3586_AGATTGCCACGACTCG	2	1	7
CID3586_AGTGGGACATCTATGG	2	1	0
CID3586_CTCATTATCGAGGTAG	2	1	7
CID3586_GACTAACCACCATGTA	2	1	7
CID3586_GTTACAGAGCGACGTA	1	0	0
CID3586_TAGCCGGCATGGTTGT	2	1	0
CID3586_TCGCGTTTCATCGATG	2	1	0
CID3586_TCTCTAATCCTAGAAC	1	0	0
CID3586_TCTGAGACAGATCCAT	2	1	0
CID3586_TTCCCAGAGCGATAGC	1	1	0
CID3586_ATAACGCTCAACGCTA	2	1	0
CID3586_GAAACTCCACATGTGT	2	1	0
CID3586_TTGGCAAAGCTTATCG	2	1	0
CID3586_ACCAGTAAGGCAAAGA	2	1	0
CID3586_AGCTCCTTCCGCTGTT	2	1	7
CID3586_CTAGAGTGTACCATCA	2	1	7
CID3586_ATCGAGTGTTGCTCCT	2	1	7
CID3586_GAGTCCGGTTTGTTTC	2	1	7
CID3586_TCAGCTCCAGGAATCG	2	1	7
CID3586_ACCCACTAGCGATTCT	2	1	7
CID3586_ACTGTCCAGTCATGCT	2	1	0
CID3586_CCAGCGAAGATCACGG	2	1	7
CID3586_TAAACCGCAGACGCAA	2	1	7
CID3586_TGCGGGTAGCGTAATA	2	1	7
CID3586_AGTGGGAAGGCAATTA	2	1	0
CID3586_AGAGTGGAGCGTTGCC	1	0	23
CID3586_AGAGTGGTCAAGGCTT	2	1	0
CID3586_AGGGTGACACTAGTAC	1	0	11
CID3586_CAGCTGGGTAAATACG	5	15	17
CID3586_CCACCTATCGCCTGAG	1	18	11
CID3586_GACTGCGCATGGGACA	2	1	0
CID3586_GCTCTGTTCTCTGAGA	2	1	0
CID3586_TGTGTTTGTGGTCTCG	5	15	17
CID3586_GCATACAGTGGTCCGT	1	0	11
CID3586_AAAGATGGTGCAGACA	2	1	11
CID3586_GCTGCTTAGTCACGCC	2	1	0
CID3586_CTACCCACAGATCTGT	1	0	11
CID3586_ACAGCCGCATGGAATA	1	0	11
CID3586_CTACGTCAGTATTGGA	1	0	1
CID3586_ATCCACCGTCAAAGCG	1	0	11
CID3586_CCGTACTTCACTGGGC	1	0	1
CID3586_CTCACACTCACCACCT	1	0	1
CID3586_TGGGCGTCATACCATG	1	0	1
CID3586_CCTAAAGCATGCCCGA	2	1	0
CID3586_CGCTTCAGTCTAGCGC	2	1	7
CID3586_TATCTCATCTGCTTGC	2	1	7
CID3586_GGAACTTGTTACAGAA	2	1	0
CID3586_ACATGGTAGGCAATTA	2	1	7
CID3586_ACCCACTTCGTCCAGG	1	0	23
CID3586_ACCGTAAGTGGTAACG	2	1	0
CID3586_ACGGGCTTCTGGCGAC	1	0	11
CID3586_ATAACGCTCGGTCTAA	2	0	0
CID3586_ATCTGCCTCAAGAAGT	2	1	0
CID3586_CAACCAAGTACATGTC	1	0	11
CID3586_CAAGATCTCTGAGTGT	1	0	23
CID3586_CACAGTATCTTGTATC	2	1	0
CID3586_CACATAGGTCCGAATT	1	0	23
CID3586_CACCTTGAGATCTGAA	1	0	1
CID3586_CATATTCTCACTCCTG	1	20	23
CID3586_CATGACACACCGTTGG	1	0	1
CID3586_CCACTACAGACAGGCT	2	1	0
CID3586_CCCAATCGTACCGGCT	1	0	23
CID3586_CCGTACTCATGCAACT	1	0	1
CID3586_CCTTACGGTAAGTGGC	1	0	23
CID3586_CGCTTCAAGATGTAAC	1	0	1
CID3586_CGGAGCTTCCTCGCAT	1	0	1
CID3586_CGTGAGCCAAGCTGGA	1	0	1
CID3586_CGTTCTGAGTGTGGCA	2	1	23
CID3586_CTAATGGGTAGAAGGA	1	20	23
CID3586_CTGATAGAGGATGTAT	1	0	1
CID3586_CTGCTGTGTAACGACG	1	0	23
CID3586_GCCTCTAAGCATCATC	1	0	11
CID3586_GCTGCTTTCTTAGCCC	1	0	0
CID3586_GGAACTTAGTTGAGTA	1	0	1
CID3586_GGATGTTAGCTATGCT	1	0	11
CID3586_GGGCATCAGAACTCGG	5	15	17
CID3586_TCAGATGCAACTGGCC	1	0	1
CID3586_TGGCGCATCGTGGACC	2	1	0
CID3586_TGTGGTATCGTCACGG	2	1	7
CID3586_TTTGGTTTCCTAAGTG	1	0	11
CID3586_GACTGCGAGAGGTTGC	2	1	0
CID3586_ATCCGAACACGCGAAA	1	0	11
CID3586_GCGACCACATCCTAGA	1	0	1
CID3586_CGAGCACCACGTCTCT	1	0	11
CID3586_ACTATCTAGTTACCCA	2	1	7
CID3586_CAGAGAGAGTTACCCA	2	1	0
CID3586_CTTAGGATCTATGTGG	2	1	0
CID3586_TGCGGGTTCCTGCAGG	2	1	7
CID3586_TGGTTAGGTCGAGTTT	2	1	7
CID3586_CCTACACAGTACATGA	2	1	0
CID3586_ACCGTAACATACTCTT	1	0	1
CID3586_CACCAGGCACAAGCCC	1	0	1
CID3586_TAAGTGCAGGAATCGC	1	0	1
CID3586_CGGACTGTCTTAGAGC	1	0	23
CID3586_CTCGTACAGAATGTTG	1	18	11
CID3586_TACGGATAGACTTTCG	2	1	0
CID3586_ACCCACTTCGTACGGC	2	1	7
CID3586_CAAGAAAGTCCGAAGA	2	1	7
CID3586_CTACCCATCTGTCTCG	9	19	22
CID3586_CATGGCGAGTAGCCGA	2	1	7
CID3586_ATAAGAGTCGTTACGA	1	18	11
CID3586_ACTGATGAGGTGACCA	1	0	11
CID3586_CTTAACTAGAGATGAG	2	1	0
CID3586_GCTCCTAAGTTGAGAT	2	1	0
CID3586_GGGAGATAGCCACGCT	2	1	0
CID3586_TAGTTGGGTTAAGACA	1	0	1
CID3586_TGAGCATCACCGATAT	2	1	0
CID3586_AAAGCAAGTGCAACGA	2	1	0
CID3586_AACCATGAGGCCCTCA	2	1	0
CID3586_AACCGCGTCCGGGTGT	2	1	0
CID3586_AACCGCGTCTGATTCT	2	1	0
CID3586_AACTCCCCAAGGTTCT	2	1	0
CID3586_AACTCTTGTTGACGTT	2	1	0
CID3586_AACTGGTTCTAACTCT	2	1	0
CID3586_AAGGTTCCATGGAATA	2	19	22
CID3586_AAGTCTGAGACAATAC	2	1	0
CID3586_ACACCAATCATTCACT	2	1	7
CID3586_ACACCCTTCAGTGCAT	2	1	0
CID3586_ACACTGAAGTTACCCA	2	1	0
CID3586_ACACTGATCGCCCTTA	2	1	0
CID3586_ACCCACTGTCCCTACT	2	1	0
CID3586_ACGAGCCCAGCTGTGC	2	1	0
CID3586_ACGAGCCGTATCACCA	2	1	0
CID3586_ACGATACTCTGTTTGT	2	1	0
CID3586_ACGCAGCAGGAGCGTT	2	1	0
CID3586_ACGCCGATCTACTATC	2	1	0
CID3586_ACGCCGATCTGCCAGG	2	1	0
CID3586_ACGGCCACACTAGTAC	2	1	0
CID3586_ACGGGCTCATCGGACC	2	1	0
CID3586_ACGTCAACATGCGCAC	2	1	0
CID3586_ACGTCAATCGTCCGTT	2	1	0
CID3586_ACTGAACGTACAGTGG	2	1	0
CID3586_ACTGCTCAGTAAGTAC	2	1	0
CID3586_ACTTACTTCAGCGATT	2	1	0
CID3586_AGAATAGTCGCCATAA	2	1	0
CID3586_AGCATACCAAAGGAAG	2	1	0
CID3586_AGCTTGAAGCTTATCG	2	1	0
CID3586_AGGCCGTCAATAGAGT	2	1	0
CID3586_AGGGAGTAGCAACGGT	2	1	0
CID3586_AGGGATGCAGTGGAGT	2	1	0
CID3586_AGGGTGAAGGTGGGTT	2	1	0
CID3586_AGGTCATGTAGAGTGC	2	1	0
CID3586_AGTCTTTAGTCTCAAC	2	1	0
CID3586_AGTCTTTGTTGCGTTA	2	1	0
CID3586_AGTGAGGGTATTCGTG	2	1	0
CID3586_ATCACGATCCGAAGAG	2	1	0
CID3586_ATCATGGCATGTCTCC	2	1	0
CID3586_ATCATGGGTGCGATAG	2	1	0
CID3586_ATGCGATTCAAAGACA	2	1	0
CID3586_ATGCGATTCCAAATGC	2	1	0
CID3586_ATGTGTGCATCGTCGG	2	1	0
CID3586_ATTATCCTCCGCTGTT	2	1	0
CID3586_ATTGGTGGTCAAAGCG	2	1	0
CID3586_CAACCTCAGCTACCGC	2	1	0
CID3586_CAAGAAAAGATAGGAG	2	1	0
CID3586_CACAAACAGTGTTGAA	2	1	7
CID3586_CACAAACGTGATGTCT	2	1	0
CID3586_CACAGTACAAGAGTCG	2	1	0
CID3586_CACTCCAGTTCTCATT	2	1	0
CID3586_CAGAATCGTAAGTGGC	2	1	0
CID3586_CAGAGAGCATGTAAGA	2	1	0
CID3586_CAGCAGCAGAGTTGGC	2	1	0
CID3586_CAGCCGACAATAGCGG	2	1	0
CID3586_CAGCGACAGCGCCTTG	2	1	0
CID3586_CAGCTGGCAGTCGTGC	2	1	0
CID3586_CATCCACTCCTAGGGC	2	1	0
CID3586_CATCGAAAGCAATCTC	2	1	0
CID3586_CATCGAAGTTACAGAA	2	1	0
CID3586_CATCGAAGTTAGGGTG	2	1	0
CID3586_CATCGGGAGGACTGGT	2	1	0
CID3586_CATGACAGTGTTTGTG	2	1	0
CID3586_CATGGCGCAAGAGTCG	2	1	0
CID3586_CATGGCGGTTGTACAC	2	1	0
CID3586_CCACCTAGTCCAGTTA	2	1	0
CID3586_CCACGGATCCTAGAAC	2	1	0
CID3586_CCATTCGCACCCATGG	2	1	0
CID3586_CCCAATCCATACAGCT	2	1	0
CID3586_CCGTACTCACCCAGTG	2	1	0
CID3586_CCGTTCACATGCTGGC	2	1	0
CID3586_CCTAAAGTCGTGGGAA	2	1	0
CID3586_CCTACACAGCTAGTTC	2	1	0
CID3586_CCTAGCTAGTAGGCCA	2	1	0
CID3586_CCTCTGATCTTCGGTC	2	1	0
CID3586_CCTTACGGTCGTGGCT	2	1	0
CID3586_CCTTCCCGTCTCCACT	2	1	0
CID3586_CCTTTCTTCCACGCAG	2	1	0
CID3586_CGAACATTCGGCGCAT	2	1	0
CID3586_CGAATGTCAAGGTTTC	2	1	0
CID3586_CGAATGTGTCGAACAG	2	1	0
CID3586_CGAATGTTCGGTCCGA	2	1	0
CID3586_CGACCTTCATTTCAGG	2	1	0
CID3586_CGAGCACGTGCGATAG	2	1	0
CID3586_CGAGCCAAGACCACGA	2	1	0
CID3586_CGAGCCAAGTGACTCT	2	1	0
CID3586_CGAGCCAGTGAGGGTT	2	1	0
CID3586_CGATCGGTCCTCATTA	2	1	0
CID3586_CGATTGAAGCGTGTCC	2	1	0
CID3586_CGCGGTAAGATGTGTA	2	1	0
CID3586_CGCTTCAGTGGACGAT	2	1	0
CID3586_CGGACTGTCAATCTCT	2	1	0
CID3586_CGGAGCTAGAAGCCCA	2	1	0
CID3586_CGGAGTCGTCATTAGC	2	1	0
CID3586_CGGAGTCGTTCTCATT	2	1	0
CID3586_CGGGTCATCCTGCCAT	2	1	0
CID3586_CGTAGCGTCTGAAAGA	2	1	0
CID3586_CGTCCATTCTTAGAGC	2	1	0
CID3586_CGTGTAACATCCCACT	1	0	0
CID3586_CGTTAGAAGCTCCTTC	2	1	0
CID3586_CTAACTTGTCCATCCT	1	18	11
CID3586_CTAACTTTCCTAGAAC	2	1	0
CID3586_CTAATGGAGTTGCAGG	2	1	0
CID3586_CTACCCATCGGAATCT	2	1	0
CID3586_CTAGCCTAGAGTGAGA	2	1	0
CID3586_CTAGCCTTCGCCCTTA	2	1	0
CID3586_CTCACACAGCCTCGTG	2	1	0
CID3586_CTCGGGAAGAGACTTA	2	1	0
CID3586_CTCGTACTCGTGACAT	2	1	0
CID3586_CTGAAACGTTCCCGAG	2	1	0
CID3586_CTGCCTATCAGTTCGA	2	1	0
CID3586_CTGCGGAAGCCAGTAG	2	1	0
CID3586_CTGCTGTAGTCGATAA	2	1	0
CID3586_CTGGTCTTCTGTCAAG	2	1	0
CID3586_CTGTGCTTCCCAACGG	2	1	0
CID3586_CTGTGCTTCCTAGAAC	2	1	0
CID3586_CTTACCGCACTGCCAG	2	1	0
CID3586_CTTAGGATCGACGGAA	2	1	0
CID3586_CTTCTCTCACACCGCA	2	1	0
CID3586_CTTCTCTGTACAGTGG	2	1	0
CID3586_CTTGGCTCATGGTCAT	2	1	0
CID3586_GAATAAGCATTTCAGG	2	1	0
CID3586_GACCAATGTGGCCCTA	2	1	0
CID3586_GACCAATGTTCGCTAA	2	1	0
CID3586_GACGCGTCATTTGCTT	2	1	0
CID3586_GATCGATAGGGATGGG	1	0	0
CID3586_GATCGATAGGTGCACA	2	1	0
CID3586_GATCGATAGTTTCCTT	2	1	0
CID3586_GATGAAAGTTACGACT	2	1	0
CID3586_GATGAGGTCCAAACAC	2	1	0
CID3586_GATTCAGCATCTACGA	2	1	7
CID3586_GCAAACTCATCTCCCA	2	1	0
CID3586_GCACATATCACTTATC	2	1	0
CID3586_GCAGTTAAGTCTCAAC	2	1	0
CID3586_GCAGTTATCGTGTAGT	1	18	11
CID3586_GCCTCTAGTCGGGTCT	2	1	0
CID3586_GCGACCACACAACGTT	2	1	0
CID3586_GCGACCAGTCGAATCT	2	1	0
CID3586_GCGAGAAAGCGTGAAC	2	1	0
CID3586_GCGCAGTGTGTGACCC	2	1	0
CID3586_GCGCAGTTCACCAGGC	2	1	0
CID3586_GCTGCAGCACGGTAGA	2	1	0
CID3586_GCTGCAGCATGCTAGT	2	1	0
CID3586_GCTGCGATCCGTACAA	2	1	0
CID3586_GGAAAGCGTTCGTGAT	1	18	11
CID3586_GGAAAGCTCAAGCCTA	2	1	0
CID3586_GGAACTTCAGAAGCAC	2	1	0
CID3586_GGACAGACACATCTTT	2	1	0
CID3586_GGACAGAGTCGAATCT	2	1	0
CID3586_GGGAATGAGGCAAAGA	2	1	0
CID3586_GGGAATGCATGAACCT	2	1	0
CID3586_GGGACCTAGAGTAAGG	2	1	0
CID3586_GGGATGACAGTGACAG	2	1	0
CID3586_GGGCACTTCGGTTAAC	2	1	0
CID3586_GGGTCTGCAACGCACC	2	1	0
CID3586_GGGTTGCGTCCGCTGA	2	1	0
CID3586_GGTATTGGTCAATGTC	2	1	0
CID3586_GGTGAAGAGCCTATGT	2	1	0
CID3586_GGTGCGTTCCTACAGA	2	1	0
CID3586_GTACGTACAGACAAAT	2	1	0
CID3586_GTACTCCAGACTTTCG	2	1	0
CID3586_GTACTCCGTAGCCTCG	2	1	0
CID3586_GTAGGCCAGACGCAAC	2	1	0
CID3586_GTAGGCCAGTGCAAGC	2	1	0
CID3586_GTAGGCCTCAAGAAGT	1	0	0
CID3586_GTAGTCATCAACACTG	2	1	0
CID3586_GTATTCTAGCGTCAAG	2	1	0
CID3586_GTCAAGTGTATGAATG	2	1	0
CID3586_GTCAAGTTCATCTGTT	2	1	0
CID3586_GTCACAATCATCTGTT	2	1	0
CID3586_GTGCAGCCAGGGATTG	2	1	0
CID3586_GTGTGCGCAAGTTAAG	2	1	0
CID3586_GTGTTAGAGCCTTGAT	2	1	7
CID3586_GTTCTCGAGAGTAAGG	2	1	0
CID3586_TAAACCGGTGACCAAG	2	1	0
CID3586_TAAGAGAAGAGCTGCA	2	1	0
CID3586_TACCTATGTTCAACCA	2	1	0
CID3586_TACGGATTCTTGTTTG	2	1	0
CID3586_TAGACCATCACAATGC	1	0	0
CID3586_TAGGCATTCCCAACGG	2	1	0
CID3586_TAGTGGTGTGGTTTCA	2	1	0
CID3586_TATCAGGAGTGACATA	2	1	0
CID3586_TCAATCTTCGCCGTGA	2	1	0
CID3586_TCAGATGCACATCTTT	2	1	0
CID3586_TCAGCTCGTTGGTTTG	2	1	0
CID3586_TCATTTGGTAGCTCCG	2	1	0
CID3586_TCGCGTTAGTGTGAAT	2	1	0
CID3586_TCGCGTTTCCTGTACC	1	0	11
CID3586_TCGCGTTTCTTGCATT	2	1	0
CID3586_TCGGGACCAGTCGATT	2	1	0
CID3586_TCGTACCGTCAAACTC	2	1	0
CID3586_TCTCATATCTGAGGGA	2	1	0
CID3586_TCTTTCCGTCGGATCC	2	1	0
CID3586_TGAAAGAGTCACACGC	2	1	0
CID3586_TGACGGCCACTGTCGG	2	1	0
CID3586_TGACTTTAGCTAGCCC	2	18	11
CID3586_TGAGAGGGTTCCACTC	2	1	0
CID3586_TGAGCATCAATGTAAG	2	1	0
CID3586_TGCCAAATCTTGTACT	2	1	0
CID3586_TGCGTGGTCGGAATCT	2	1	0
CID3586_TGCTGCTAGAGTAAGG	2	1	0
CID3586_TGGGCGTGTTAGGGTG	2	1	0
CID3586_TGGGCGTTCGCCATAA	2	1	0
CID3586_TGGGCGTTCGTGACAT	2	1	0
CID3586_TGGTTCCAGCGACGTA	2	1	0
CID3586_TGTCCCATCCAACCAA	2	1	0
CID3586_TTCCCAGTCTCTTATG	2	1	0
CID3586_TTCGAAGAGTCAAGCG	2	1	0
CID3586_TTGACTTGTGGCCCTA	2	1	0
CID3586_TTGGAACTCTTGCAAG	2	1	0
CID3586_TTGGCAACAGCTCGAC	2	1	0
CID3586_TTGTAGGAGAGCCCAA	2	1	0
CID3586_TTTCCTCAGTTTGCGT	2	1	0
CID3586_TTTGCGCAGCTCCTTC	2	1	0
CID3586_TTTGCGCAGGATATAC	2	1	0
CID3586_AAACCTGGTCCAGTAT	1	0	11
CID3586_AACCATGAGTGTTGAA	2	1	0
CID3586_AGGGTGAGTTAAGATG	2	1	0
CID3586_GAAACTCGTCGTTGTA	2	1	0
CID3586_GCGCAACGTAAGCACG	2	1	0
CID3586_AACGTTGAGAAGAAGC	2	1	0
CID3586_ACGCAGCGTGCAGTAG	2	0	0
CID3586_CAAGAAATCCCGGATG	2	1	0
CID3586_CCAGCGACATTCGACA	2	1	0
CID3586_CGATGTATCAGCGACC	2	1	0
CID3586_GATGCTAGTGCCTTGG	2	1	0
CID3586_GCAGTTACAATAGCAA	2	1	0
CID3586_GCGCAACCATCCTAGA	2	1	0
CID3586_GTACTCCAGTTAAGTG	2	1	0
CID3586_GTCGGGTTCGCGTTTC	2	1	0
CID3586_GTTCTCGGTCACTGGC	2	1	0
CID3586_TTCGGTCCACGGTGTC	2	1	7
CID3586_TTTGGTTTCAGCTCTC	2	1	0
CID3586_CCACTACCACCACGTG	2	1	7
CID3586_CTCTACGCACCGTTGG	2	1	7
CID3586_CGAGCCAAGGATGGAA	2	1	0
CID3586_AACTTTCGTCATACTG	2	1	0
CID3586_GGGTCTGTCACGAAGG	2	0	0
CID3586_CAACCTCTCCAACCAA	2	1	0
CID3586_GCGCAACAGCTGTTCA	2	1	0
CID3586_TAAGCGTAGACCACGA	2	1	0
CID3586_GCATGTACAACACCTA	2	1	0
CID3586_CGGTTAATCGATGAGG	2	1	0
CID3586_TTGGAACGTTGCCTCT	2	1	0
CID3586_AGCAGCCAGATGTGGC	2	1	0
CID3586_CATATGGGTTTGGCGC	2	1	0
CID3586_GGCTGGTGTGGCAAAC	2	1	0
CID3586_AGCGTCGAGAAGAAGC	2	1	0
CID3586_TCAGCAATCAGCAACT	1	0	1
CID3586_CATATTCGTCTACCTC	2	1	0
CID3586_AAACCTGCAGACAGGT	2	1	0
CID3586_AAGACCTTCAGTTAGC	2	1	0
CID3586_AAGGAGCCACCTATCC	2	1	0
CID3586_AAGTCTGAGAGCAATT	2	1	0
CID3586_ACACTGATCGCACTCT	1	18	11
CID3586_ACATACGCAGCTGGCT	2	1	0
CID3586_ACATCAGGTCTCCCTA	2	1	0
CID3586_ACGCCGAAGAGTGACC	2	1	0
CID3586_ACTTACTAGTGTACCT	2	1	0
CID3586_AGAGCGAGTGTCGCTG	2	1	0
CID3586_AGCAGCCCACATTAGC	2	1	0
CID3586_AGTGTCACACAACGCC	2	1	0
CID3586_ATAACGCAGTTTGCGT	2	1	0
CID3586_ATTGGTGCATCCGCGA	2	1	0
CID3586_CAACTAGGTGGCCCTA	2	1	0
CID3586_CACACAACATCACCCT	2	1	0
CID3586_CACCTTGAGTCCTCCT	2	1	0
CID3586_CAGCAGCAGGCTAGCA	2	1	0
CID3586_CAGCGACAGTGTACGG	2	1	0
CID3586_CCATGTCCAAGACACG	2	1	0
CID3586_CCGGGATAGGAATGGA	2	1	0
CID3586_CCGTTCATCTGCAGTA	2	1	0
CID3586_CCTACCAGTGTAAGTA	2	1	0
CID3586_CGACTTCTCAGTCCCT	2	1	0
CID3586_CGATGGCAGGTGTTAA	2	1	0
CID3586_CGATGGCAGTCTCAAC	2	1	0
CID3586_CGTCACTAGTCATGCT	2	1	0
CID3586_CGTCCATCAATGACCT	2	1	0
CID3586_CGTGTCTAGACTACAA	2	1	0
CID3586_CTCGAGGGTAATAGCA	2	1	0
CID3586_CTGAAGTTCTCAAGTG	2	1	0
CID3586_GACGCGTGTTAGAACA	2	1	0
CID3586_GCAGCCATCGGTTCGG	2	1	0
CID3586_GCGGGTTAGGAATTAC	5	15	17
CID3586_GCTGCAGGTTGTCTTT	2	1	0
CID3586_GCTGCTTCATATGAGA	2	1	0
CID3586_GGACATTTCAGAGCTT	2	1	7
CID3586_GGATGTTCAAGGCTCC	2	1	0
CID3586_GGCGTGTGTACAGTTC	2	1	0
CID3586_GGGTCTGAGATGCCTT	2	1	0
CID3586_GTCTCGTAGCAGACTG	2	1	0
CID3586_TAAACCGAGTTAACGA	2	1	0
CID3586_TAAGAGAAGACGCTTT	2	1	0
CID3586_TACCTATGTAGCACGA	2	1	0
CID3586_TACCTTAGTTCCGTCT	2	1	0
CID3586_TACTTGTCAACAACCT	5	15	17
CID3586_TACTTGTTCACGCGGT	2	1	0
CID3586_TATCAGGAGTGGTCCC	2	1	0
CID3586_TATGCCCTCTCCCTGA	2	1	0
CID3586_TCAATCTAGTTGTAGA	2	1	0
CID3586_TCACGAACACAGCCCA	2	1	0
CID3586_TCAGGTAGTTTCCACC	2	1	0
CID3586_TCATTACAGCCAGTAG	2	1	0
CID3586_TCGCGTTCAACAACCT	2	1	0
CID3586_TCGGGACTCACCTTAT	2	1	0
CID3586_TGACAACAGAAGCCCA	2	1	0
CID3586_TGCCAAAAGCTACCGC	2	1	0
CID3586_TGCGTGGGTCCCGACA	2	1	0
CID3586_TGTGGTAGTCAGATAA	2	1	0
CID3586_TTCTACAAGAGGTACC	5	15	17
CID3586_TTCTCAAAGATCCTGT	2	1	0
CID3586_TTGCCGTTCTCCAACC	2	1	0
CID3586_TTTGCGCGTCCTAGCG	2	1	0
CID3586_ACGCCGATCTCGCATC	5	15	17
CID3586_GACACGCAGAACTGTA	2	1	0
CID3586_CATTCGCGTACGACCC	2	1	7
CID3586_GCAAACTGTCCCTACT	2	1	0
CID3586_GTCACAAAGTACGATA	2	1	0
CID3586_AGAGTGGAGACTAGAT	2	1	0
CID3586_CATGGCGTCACAGGCC	2	1	0
CID3586_CTTGGCTAGGTGCACA	2	1	0
CID3586_CATATTCCACAACGCC	5	15	17
CID3586_CGTTCTGTCACCTCGT	5	15	17
CID3586_GCATGATCATCAGTCA	2	1	0
CID3586_GTACGTAAGTGTACTC	5	15	17
CID3586_GTCGGGTAGGACATTA	5	7	8
CID3586_GTCGGGTCATTGGTAC	5	7	8
CID3586_GCATGTATCTTCTGGC	2	1	7
CID3586_TGGCCAGTCACAACGT	5	15	17
CID3586_AAACCTGAGGCTCAGA	1	0	1
CID3586_AACCATGAGACTGGGT	1	0	1
CID3586_ACGGGCTAGTGCGATG	1	0	1
CID3586_ACGGGCTCAGACGTAG	1	0	1
CID3586_ACGGGTCAGCCAGTTT	1	0	1
CID3586_ACTATCTAGATGCGAC	1	0	1
CID3586_ACTATCTCATGAACCT	1	0	1
CID3586_ACTGAGTAGGCTCTTA	1	0	1
CID3586_AGACGTTCACAGACAG	1	0	11
CID3586_AGCGGTCAGGCACATG	1	0	1
CID3586_AGCTCTCGTACGCACC	1	0	1
CID3586_AGGGATGGTCAGAATA	1	0	1
CID3586_AGTGTCAAGCCTTGAT	1	0	1
CID3586_ATCCACCTCTTCATGT	1	0	1
CID3586_ATTTCTGCATTTCACT	1	0	1
CID3586_CAAGATCGTGTTCGAT	1	0	1
CID3586_CACCAGGCACACCGAC	1	0	11
CID3586_CACCAGGTCGTTGCCT	1	0	1
CID3586_CAGCAGCAGACAGACC	1	0	11
CID3586_CAGCTGGAGAATTCCC	1	0	1
CID3586_CAGGTGCCACCCATGG	1	0	1
CID3586_CATATTCAGAGGGATA	1	0	11
CID3586_CCATGTCTCGGCTTGG	1	0	11
CID3586_CCATTCGTCGCTAGCG	1	0	11
CID3586_CCGTACTAGGATCGCA	1	0	1
CID3586_CCGTACTTCCTAGAAC	1	0	1
CID3586_CCTACACAGCGATCCC	1	0	11
CID3586_CCTCTGACAATAAGCA	1	0	1
CID3586_CCTTCCCCAGTATGCT	1	0	1
CID3586_CCTTCCCGTCACAAGG	1	0	1
CID3586_CGAGCACTCTAACTGG	1	0	1
CID3586_CGGACACGTTACTGAC	1	0	1
CID3586_CGTAGCGGTTCTGGTA	1	0	1
CID3586_CTAAGACCATCACGTA	1	0	11
CID3586_CTCGGAGTCTACTCAT	1	0	1
CID3586_CTGATCCGTTGTTTGG	1	0	1
CID3586_GAAATGAGTATGAATG	1	0	1
CID3586_GACACGCCACCTATCC	1	0	11
CID3586_GACGGCTTCATTGCGA	1	0	11
CID3586_GACTGCGAGCGATTCT	1	0	1
CID3586_GAGGTGAAGTACCGGA	1	0	1
CID3586_GAGTCCGGTTGACGTT	1	0	1
CID3586_GATCAGTCAATCAGAA	5	7	8
CID3586_GATCGATAGTCTCGGC	1	0	1
CID3586_GCAATCATCCGGCACA	1	0	11
CID3586_GCACTCTTCCTTAATC	1	0	11
CID3586_GCAGCCATCCCAAGTA	1	0	11
CID3586_GCAGCCATCTCACATT	1	0	1
CID3586_GCCAAATTCTCTGAGA	1	0	1
CID3586_GCGACCATCGTTACGA	1	0	11
CID3586_GCTCTGTCACAAGACG	1	0	1
CID3586_GCTGGGTGTGTGGCTC	1	0	1
CID3586_GCTTGAAGTTCAGGCC	1	0	1
CID3586_GGACATTCAATGCCAT	1	0	11
CID3586_GGACATTCACGTAAGG	1	0	1
CID3586_GGACGTCGTGAAAGAG	1	0	1
CID3586_GGAGCAATCGGCCGAT	1	0	11
CID3586_GGATGTTAGTAGTGCG	1	0	1
CID3586_GGGAGATGTCAATACC	1	0	1
CID3586_GGGCACTGTGTCTGAT	1	0	1
CID3586_GGGCACTTCGACAGCC	1	0	1
CID3586_GGGCATCCATACTACG	1	0	1
CID3586_GTCATTTCAGCTTAAC	1	0	1
CID3586_GTCATTTGTTGTTTGG	1	0	1
CID3586_GTCGTAAAGCCGGTAA	1	0	11
CID3586_GTCGTAAGTCTAGCGC	1	0	1
CID3586_GTGAAGGCACATGTGT	1	0	11
CID3586_TACACGAGTAATCACC	1	0	1
CID3586_TAGTGGTCAGTATCTG	1	0	1
CID3586_TAGTGGTTCAAAGACA	1	0	1
CID3586_TCAATCTTCGTACGGC	1	0	1
CID3586_TCACGAAGTGCAGGTA	1	0	1
CID3586_TCAGATGAGATATACG	1	0	1
CID3586_TCAGCAAGTCAGAGGT	1	0	1
CID3586_TCGAGGCCACAGATTC	1	0	1
CID3586_TCTCATAGTCGGATCC	1	0	1
CID3586_TCTGAGAGTAATTGGA	1	0	1
CID3586_TGCACCTTCAACGCTA	1	0	1
CID3586_TGGCCAGCACATGGGA	1	0	1
CID3586_TGGCTGGCACGGTGTC	1	0	1
CID3586_TGTGGTAGTCGCTTTC	1	0	1
CID3586_TGTGTTTGTGAGCGAT	1	0	1
CID3586_TTAACTCTCACCATAG	1	0	1
CID3586_TTAGTTCCAGTATGCT	1	0	1
CID3586_TTCTACAAGAAGCCCA	1	0	1
CID3586_TTCTACACATGCTAGT	1	0	1
CID3586_TTCTACATCATTCACT	1	0	1
CID3586_TTCTCCTGTGTTCGAT	1	0	1
CID3586_TTCTCCTTCACCGGGT	1	0	1
CID3586_TTGGCAACACGACTCG	1	0	1
CID3586_TTTGTCAGTAGCTTGT	1	0	1
CID3586_AAAGCAATCCTATTCA	1	0	1
CID3586_AACGTTGGTAAATGTG	1	0	1
CID3586_AACTCCCTCAGTTAGC	1	0	1
CID3586_AACTCCCTCCTGCAGG	1	0	1
CID3586_AACTTTCCAGTATAAG	1	0	1
CID3586_AAGGAGCGTGAGCGAT	1	0	1
CID3586_AAGGCAGAGTTTCCTT	1	0	1
CID3586_AAGTCTGTCCGAATGT	1	18	1
CID3586_ACAGCCGCACATTTCT	1	0	1
CID3586_ACAGCTAAGGGTCGAT	1	0	11
CID3586_ACCCACTAGGAGTTTA	2	0	1
CID3586_ACGATGTCAAAGTGCG	1	0	1
CID3586_ACGCCAGCAATGAATG	1	0	11
CID3586_ACGGGCTAGAGAGCTC	1	0	1
CID3586_ACGGGTCTCTCAAACG	1	0	1
CID3586_ACGTCAAGTACATCCA	1	0	1
CID3586_ACTGATGAGAAGAAGC	1	0	1
CID3586_ACTTTCACACATAACC	1	0	1
CID3586_ACTTTCACACCGCTAG	1	0	1
CID3586_AGAATAGTCCAAACAC	1	0	1
CID3586_AGAGCGAAGGTAGCCA	1	0	1
CID3586_AGAGCGATCCCGACTT	1	0	1
CID3586_AGAGCTTGTGCCTGGT	1	0	1
CID3586_AGCTCCTAGATGCGAC	1	0	1
CID3586_AGGCCACCATTTCAGG	1	0	1
CID3586_AGGCCGTAGATCCTGT	1	0	1
CID3586_AGTAGTCTCGCTTAGA	1	0	1
CID3586_ATAACGCGTCAGCTAT	1	0	1
CID3586_ATAGACCAGCGAGAAA	1	0	1
CID3586_ATCATCTAGAGTGAGA	1	0	1
CID3586_ATCATCTTCATTTGGG	1	0	1
CID3586_ATCATGGTCGACCAGC	1	0	1
CID3586_ATCTACTAGTTCGCAT	1	0	1
CID3586_ATCTACTCAGACGCTC	1	0	1
CID3586_ATCTACTTCGGGAGTA	1	0	11
CID3586_ATCTGCCTCATCTGTT	1	0	1
[truncated: 90,234 more rows]

## Sheet: C. MSC Clusters
C. Multi-scale clusters identified MSC in .GMT format.
M1	CID4495_CATTCGCTCACAGGCC	CID4495_AAGCCGCGTTCAGCGC	CID44971_CCACGGAGTGAGTGAC	CID44971_CGACCTTGTTCGCGAC	CID44971_TGCGCAGCAAGGTGTG	CID44971_TGGCCAGTCTGTTTGT	CID4523_GCGCCAAGTAATCACC	CID4530N_CACACAAAGACTTTCG	CID4471_ACGTCAAAGATGTTAG	CID4066_TTCTTAGAGCAAATCA	CID4495_ACGCCGAAGATGTAAC	CID4495_AGAGCGAAGCATCATC	CID4495_AGCTCCTTCTACTATC	CID4515_CATCGAAGTCTCTTAT	CID3921_TCATTTGAGAAGGGTA	CID4066_AGCATACCAAATACAG	CID4066_GCATGATGTACTTGAC	CID4066_CGAATGTAGTGTTAGA	CID44971_AGGCCACAGAATGTTG	CID44971_AGATTGCTCAATACCG	CID4513_CGTTGGGCAAAGTGCG	CID3963_TGCTACCAGGTGCTTT	CID4471_AGCAGCCTCCGAATGT	CID4530N_GAGTCCGGTTGAGTTC	CID4530N_ACCAGTATCAAGATCC	CID44971_CGTGTAAAGAGTAATC	CID3586_CAGAGAGCAAGTTAAG	CID3921_AAACGGGAGCTAGGCA	CID3921_TCAGGTAAGGAGTTGC	CID4066_TCAGCTCGTTGGTAAA	CID4066_GCAGCCACAGCTGTGC	CID4495_CTTAGGAGTCTGGTCG	CID4495_TAGGCATGTGAGGGTT	CID44971_GCGCCAAGTTTACTCT	CID44971_ACAGCTACAGATCCAT	CID44991_ACGAGGATCCGCATAA	CID4515_ACACCCTCAGGTGGAT	CID3946_AGATCGTGTCAGACGA	CID4471_ATGTGTGAGTGCCATT	CID4530N_TCTGAGAGTGCACGAA	CID4535_ACACCCTCATACTACG	CID4471_TTGTAGGGTGAGGGTT	CID3921_CCATTCGTCCTCATTA	CID3921_GGAATAAGTGAAATCA	CID3921_TCACAAGCAAAGCAAT	CID45171_TAAACCGTCGCTAGCG	CID3838_CTACCCAGTCCAATCA	CID4066_CGGAGTCGTACAGCAG	CID44041_AAACCTGAGACAAAGG
M28	CID4495_CATTCGCTCACAGGCC	CID4495_AAGCCGCGTTCAGCGC	CID4495_ACGCCGAAGATGTAAC	CID4495_TAGGCATGTGAGGGTT	CID4495_CTGCGGACAACGATCT	CID4495_TCAGCTCCAGTATCTG	CID4495_AAAGATGTCTGTTTGT	CID44991_GGACATTTCGGCGCAT	CID44991_CAGCCGATCAATAAGG	CID3921_AAGCCGCAGCCGCCTA	CID4495_GGACATTAGAATTGTG	CID4495_CTCGGGAAGGGTCTCC	CID4495_CTGTTTAAGGATATAC	CID4495_CTCTAATCAGCGTAAG	CID4495_GGTGCGTCAACAACCT	CID44991_GTCTCGTAGCGTAATA	CID4495_CGACCTTAGAGCAATT	CID4495_TCTTTCCCAAGGTGTG	CID4495_CCTAAAGTCTAACTTC	CID4495_CCTTTCTAGAGGGCTT	CID44991_TCATTACCAGACAAAT	CID4535_CTCGAAAGTTTGTTGG	CID44991_CCGTACTAGCTAAACA	CID3921_TCATTACGTCCAACTA	CID4495_ACACCCTAGGTGACCA	CID4495_CATCGAATCGACGGAA	CID4495_CGTGTCTTCAGCGACC	CID4495_GTACTCCAGTAACCCT	CID4495_ACCTTTAGTCACTTCC	CID4495_AGGTCCGTCGTACGGC	CID4495_AGTTGGTAGGTAAACT	CID4495_GGAACTTTCGCCGTGA	CID4495_TACAGTGCAATCTGCA	CID4495_CTTAGGACATCGGACC	CID4495_GAAGCAGAGGCGACAT	CID4495_AACTTTCAGGTGGGTT	CID44991_CCACCTACAGTTCATG	CID44991_AAGTCTGCATGCATGT	CID44991_GCCTCTAGTACTCTCC	CID44991_TTAGTTCCAAACCCAT	CID44991_ACGGGCTCAAGGTGTG	CID44991_GCTCCTATCCCAAGAT	CID3921_AGGGATGGTTCAGCGC	CID3838_CGAAGTTAGAGCAGCT	CID4495_CTTAACTAGACTAGAT	CID4495_ATCATGGGTCTTGTCC	CID3921_TACCTTACAGGCGATA	CID3921_TTGGCAAAGCCAGTAG	CID4465_AACCGCGCAGCCACCA
M29	CID44971_CGACCTTGTTCGCGAC	CID44971_TGCGCAGCAAGGTGTG	CID44971_TGGCCAGTCTGTTTGT	CID4523_GCGCCAAGTAATCACC	CID4495_AGAGCGAAGCATCATC	CID4495_AGCTCCTTCTACTATC	CID3921_TCAGGTAAGGAGTTGC	CID44971_ACAGCTACAGATCCAT	CID44991_ACGAGGATCCGCATAA	CID4535_ACACCCTCATACTACG	CID3921_TCACAAGCAAAGCAAT	CID45171_TAAACCGTCGCTAGCG	CID44971_ACGGGCTAGGGATACC	CID4523_CGAGCCACACCAGATT	CID4290A_GTCCTCAGTCAACATC	CID4066_TCATTTGCATCACGAT	CID4495_CTGCTGTCAGCCTGTG	CID4495_TCAATCTCACGTCAGC	CID4513_TCAATCTCACTGAAGG	CID4523_CATCAAGTCTCGGACG	CID4495_CGCTTCATCACAAACC	CID4495_ACGGGTCTCCTCAATT	CID4495_TACTCATGTGGCAAAC	CID44971_AGAGTGGCACCTCGTT	CID44971_AGATCTGAGCACCGCT	CID44971_AGGTCCGTCAACGGGA	CID44971_GTGGGTCGTCAGAATA	CID4530N_CGAGCCAGTTGGACCC	CID4535_GTACGTACAGCGTTCG	CID3946_GAGACCCCATGAGATA	CID3586_AAGCCGCGTCGAAAGC	CID3586_CCACTACGTAGAAGGA	CID3921_AGGCCGTAGGATGGAA	CID44971_AGAATAGCAATGGATA	CID44971_CAGAATCCAGTCTTCC	CID44971_TTATGCTTCGCTGATA	CID44971_TCATTACCAGAGCCAA	CID44991_AGGGTGAGTAAAGGAG	CID4523_TTAGTTCGTGAACCTT	CID3946_GGAACCCTCTAGCCAA	CID3946_GGTGTTAGTGAAGCGT	CID4463_CGCTTCATCACTCTTA	CID3586_CGTCTACCATATACCG	CID4495_TACAGTGGTTATTCTC	CID4495_GCTCTGTTCGCGCCAA	CID4495_GGGTTGCTCGGCGCTA	CID4535_AGGCCGTTCGGCCGAT	CID4535_CACACTCGTATTCTCT	CID4535_GTTACAGAGGAGCGTT
M30	CID4513_CGTTGGGCAAAGTGCG	CID4515_ATCCGAACATCCTAGA	CID4513_ACATGGTGTGAGGCTA	CID4513_CGTTGGGGTTTGGGCC	CID4513_GATCGCGAGCTGCCCA	CID4513_TAGAGCTGTAAATGAC	CID4513_TTAGGCACAAGCCATT	CID4515_GGACGTCAGGCCCTTG	CID3921_TAGCCGGCACAGAGGT	CID45171_CCTAGCTTCAAAGTAG	CID4495_ATTCTACGTCTGGAGA	CID44971_CTCGTACTCCGCGCAA	CID44991_CCTTTCTCAATGTAAG	CID4398_TGACGGCAGCGCCTCA	CID44971_GGGCACTCACTCAGGC	CID44971_GTTCTCGTCTACCAGA	CID44991_CCTACCACAGTCGTGC	CID4515_GACGCGTTCATGCTCC	CID4513_GCAAACTAGAGGTTGC	CID3838_AGCCACGGTCGTTATG	CID4495_AAGCCGCTCGGCGCTA	CID44971_GTAACTGCACGCATCG	CID44971_TGGCCAGGTACATCCA	CID44991_AGTGTCAAGAGCTGCA	CID44991_GATCGTATCAACACAC	CID4513_GGAGCAACACGTCTCT	CID4513_GATCGTATCCTGCAGG	CID4513_TTCTTAGCACTACAGT	CID4515_TAAGCGTAGTAAGTAC	CID44971_CCTCAGTGTGCCTGGT	CID4495_GTAACTGAGAGCAATT	CID4513_CCACCTACAGCCTTTC	CID4535_CTTCTCTGTCGAAAGC	CID4066_ACGAGGATCACATACG	CID3921_GGTATTGTCATGCATG	CID44971_GACAGAGCAAACTGTC	CID4513_GATTCAGCATTAGGCT	CID4515_ATCATGGCATTCCTCG	CID4515_CTCTGGTCATCGTCGG	CID4515_TTAACTCCACAGACAG	CID4495_ACGGGTCGTTATCACG	CID4495_CGTGTCTTCGTTTGCC	CID44971_GAACCTATCACCCTCA	CID44991_TCAGCAAAGATCCCGC	CID44991_ATAGACCAGTGAACGC	CID44991_CTGAAGTTCAGGCAAG	CID4515_TAAGAGAAGACGCTTT	CID4495_CAACCAATCTTGTCAT	CID4495_CGGAGCTGTCAGTGGA
M31	CID44971_CCACGGAGTGAGTGAC	CID4066_GCATGATGTACTTGAC	CID4066_CGAATGTAGTGTTAGA	CID3946_AGATCGTGTCAGACGA	CID44041_AAACCTGAGACAAAGG	CID44991_AATCGGTTCAGAAATG	CID44971_GATGAGGCAGTGGAGT	CID4066_CTCCTAGTCTCGTATT	CID44041_CTCCTAGGTACGCTGC	CID4513_CAGAGAGTCCGCATAA	CID4513_ACCTTTAGTTGTCGCG	CID44041_CACACAATCGGGAGTA	CID44971_GAAACTCAGTGGGATC	CID44971_AAGCCGCAGCGATAGC	CID44971_CCTACACGTCGCTTCT	CID44971_GTCAAGTGTCTTGTCC	CID4513_GATGAAACACACCGCA	CID3946_ACATTTCGTTCTTGTT	CID44971_CCTTACGTCAAAGACA	CID4513_TCTATTGCAGAGTGTG	CID4040_CTGTAGATCTTAGTTC	CID4066_AAGACCTAGTGCTGCC	CID44991_GTGTGCGTCTCCAACC	CID4513_GGCTCGAAGGGCTTCC	CID4471_GTTTCTATCATTCACT	CID4471_GAGGTGATCTGACCTC	CID4513_TTTGGTTGTGCCTGTG	CID4066_AATCGGTGTAGTACCT	CID4066_CAGTAACAGTATTGGA	CID4066_GACAGAGGTTTGCATG	CID4066_TGCCCATTCAGTTTGG	CID4066_CATTATCAGACCTAGG	CID4066_CAGTCCTTCCTAAGTG	CID4066_CTCGAAATCGGATGGA	CID44041_CATATGGCATCCGCGA	CID4495_TAAGCGTAGGATGGTC	CID44971_GAGGTGAGTGATGTCT	CID44971_CAGCAGCCATGTCCTC	CID44971_GGTGTTACATTCACTT	CID4513_ATTATCCTCTTGTCAT	CID4513_GATCTAGCAAAGGCGT	CID4471_AGCGGTCAGTTAGCGG	CID4471_CCACCTAAGGGTTTCT	CID4535_AACTCAGCACTCAGGC	CID4535_TCTGGAAAGAAGGGTA	CID4040_TTACTGTAGTCAGAGC	CID4040_GCACGTGTCAAGTCGT	CID4040_AGTGTTGAGGCTCCCA	CID3921_ATGAGGGGTGTATGGG
M32	CID3963_TGCTACCAGGTGCTTT	CID3921_CCATTCGTCCTCATTA	CID4515_GTATTCTCAAGCCGCT	CID4040_ATCGGATGTGAATATG	CID4513_TAGAGCTAGTCCAGGA	CID4530N_TAGTTGGCAGTATAAG	CID3586_ATCCGAAAGTTCGCGC	CID3586_CTCTGGTGTACCGTAT	CID3586_ACTATCTCAGGGATTG	CID4495_GACGTGCCACCAGGCT	CID3963_CCTCTGAAGGAGTTTA	CID4398_ACGGCCACACCTCGGA	CID4040_AACAAAGTCGTTCTCG	CID4066_ACATGGTCACATGTGT	CID4066_CGCCAAGCAATGTAAG	CID4066_CTTAACTGTTCGAATC	CID44971_ATAAGAGCACGAAAGC	CID4290A_TCTGGAACAGCCAGAA	CID3586_CTACACCGTCATTAGC	CID3586_CATCGGGGTCCAGTTA	CID3921_GGACGTCAGTGGCACA	CID3838_CTCATGCTCGTGCACG	CID4066_GTCTTCGCATGAACCT	CID4495_ATTACTCAGAGTCTGG	CID44971_GTCACGGGTGGAAAGA	CID3946_GATCACAGTTTGATCG	CID4471_AGTGAGGTCAGGCGAA	CID4040_AGGTAGGCATGATCTG	CID4040_TGCTCCACATGACTTG	CID3948_TCAGATGCAAATTGCC	CID44041_AACTTTCTCCTCTAGC	CID4040_CTAGACACACCAGTTA	CID3586_CGACCTTTCCTCATTA	CID3838_CTCATCGTCACGGAGA	CID4066_CTAATGGGTCTCAACA	CID44971_TGTATTCTCAAGAAGT	CID4513_ACGATACTCGGAGCAA	CID4040_CCGATGGGTCCCAAAT	CID3586_AGGGTGAGTGTCAATC	CID3586_GCGCGATTCATTATCC	CID3586_CTAGAGTAGGGTTCCC	CID3586_CTCGGGAAGCGATTCT	CID3586_CTCTACGCACCGTTGG	CID3586_GCATGATCATCAGTCA	CID3586_TTAACTCCATGCCCGA	CID3586_TGGCCAGTCAGGCGAA	CID3838_CGACAGCGTCACTCTC	CID4066_CGTCTACCAGCGTTCG	CID4066_ACTGTCCAGGCCGAAT
M33	CID4530N_CACACAAAGACTTTCG	CID4471_ACGTCAAAGATGTTAG	CID4066_AGCATACCAAATACAG	CID4530N_GAGTCCGGTTGAGTTC	CID4530N_ACCAGTATCAAGATCC	CID4066_TCAGCTCGTTGGTAAA	CID4495_CTTAGGAGTCTGGTCG	CID4471_ATGTGTGAGTGCCATT	CID4530N_TCTGAGAGTGCACGAA	CID4471_TTGTAGGGTGAGGGTT	CID3838_CTACCCAGTCCAATCA	CID4066_CGGAGTCGTACAGCAG	CID4495_CGAATGTAGTTACGGG	CID4530N_GACTAACCACACTGCG	CID3586_CATGACAGTACAGTGG	CID3921_CGTAGCGTCGGCCGAT	CID4471_CCTTACGAGGTACTCT	CID4471_GGAATAACATCGTCGG	CID4530N_CAGAATCAGATAGCAT	CID3586_AAGACCTGTTAAGTAG	CID3586_ACGGGTCCATCGATGT	CID4066_TGCCCTAAGGCATGGT	CID4066_TCGCGAGGTCCGCTGA	CID4530N_CTGTTTACACATCCAA	CID4530N_ATCACGAGTAGCGCAA	CID4471_TGAGGGATCACCACCT	CID3921_ATTGGACTCTGGAGCC	CID4066_TACACGATCAACCATG	CID4495_GGGTTGCCATGGTAGG	CID3963_AACTCCCCAGCTCGAC	CID4471_ATGTGTGAGAGAACAG	CID4471_GTCACAACATCGGGTC	CID4471_CTGAAGTCAAAGGAAG	CID4530N_GTGCGGTAGTGGAGTC	CID4530N_TGGGAAGTCCGCATAA	CID4530N_GACGCGTGTCTGATTG	CID4398_TGATTTCCAGCTTAAC	CID4495_GTTCATTAGAGTCGGT	CID3586_CTGCTGTAGATGGGTC	CID4465_ATTACTCAGTTACGGG	CID4471_CTACATTTCCCACTTG	CID4530N_CTCTACGCATCGGAAG	CID4530N_AGAGTGGAGTGGTAAT	CID4530N_CACTCCAAGGAGTTTA	CID4066_CCGGTAGGTCGGCACT	CID4471_CCTACACCAGTTTACG	CID4471_ACTGCTCCAGCATGAG	CID4471_ATCGAGTCAAGTACCT	CID4471_TGCCCTACAGCCTGTG
M34	CID4066_TTCTTAGAGCAAATCA	CID4471_AGCAGCCTCCGAATGT	CID4066_GCAGCCACAGCTGTGC	CID4066_TTTGGTTTCCATGAGT	CID4471_GACGCGTTCCGTAGGC	CID4471_CTCGTCATCATGTCTT	CID4066_CACAGTAGTAGGACAC	CID4066_GCATGCGGTAGAGTGC	CID4465_GTCATTTAGGTAAACT	CID4471_CGCCAAGTCACGACTA	CID4040_CTCACTGAGCTTACGT	CID4066_AGAATAGAGTTAGGTA	CID4066_CATATTCTCAGGCAAG	CID4471_TGACGGCGTACAGTTC	CID4471_ACGCCGACACGAAGCA	CID4471_TGCTGCTAGTCTCAAC	CID4535_TTTACTGGTCACCCAG	CID4040_AAAGTCCCATGTGGCC	CID3946_TAACCAGAGTCATGAA	CID4463_CAAGAAAGTACTTGAC	CID4471_AAAGATGCAGTGACAG	CID4471_GGCTGGTGTGTCCTCT	CID4040_AGATAGAGTCGCCTAG	CID4040_CCGTTCAGTGAGCGAT	CID4067_CAGAATCAGGCCCGTT	CID4066_CTACGTCAGGACATTA	CID4066_GTGAAGGCACGAAACG	CID44041_GTATTCTCATCAGTCA	CID4465_AAGGCAGAGGAGCGTT	CID4465_TAAGTGCGTCCCGACA	CID3946_CTGTGGGCATGAATCC	CID3946_CATGCTCAGTAGGAAG	CID4463_CCCAGTTAGGCCCTCA	CID4471_ACGGAGAAGATCCGAG	CID4535_ACTGCTCAGCCGCCTA	CID4040_TTGGATGTCATGAAAG	CID4040_GGCTGTGGTCGTATTG	CID4066_ATAACGCAGGCTCTTA	CID4530N_CTCTAATCAGAGTGTG	CID4066_CACAGTAGTTCCCGAG	CID4471_CGACCTTGTCTAGAGG	CID4530N_CGCGGTACATCAGTAC	CID4535_TCAGGTATCCCAACGG	CID4040_ACACCAAAGTCCCAGC	CID3948_GACTAACTCGTACGGC	CID4066_AGCTCCTGTCAAAGCG	CID4066_AGGGATGCAGAAGCAC	CID4066_CTCATTATCAGGTTCA	CID4066_ACGCAGCCAAATACAG
M35	CID4515_CATCGAAGTCTCTTAT	CID4515_ACACCCTCAGGTGGAT	CID4515_TTTATGCCAGTATAAG	CID4471_TTCTCCTTCCACGACG	CID4513_ACATCAGCATATGGTC	CID4471_TAAGTGCTCGAGCCCA	CID4515_CCCAATCCAGTGAGTG	CID4515_GCGAGAACACCTATCC	CID4513_CAAGATCAGTAGCCGA	CID4513_CAGCGACTCCAATGGT	CID4513_CCGTGGAGTCCCTACT	CID4515_CAACTAGCATTGTGCA	CID3586_GACGGCTTCTCTGAGA	CID44971_CGTAGCGCATGCCCGA	CID44971_TTAGGCAAGGTCGGAT	CID4513_GTGTGCGAGGAGTTTA	CID4513_TCGGTAATCTCAAACG	CID4515_AAGTCTGTCAAAGTAG	CID4463_ATTACTCGTAAACGCG	CID4515_ACGGAGAAGACACGAC	CID4471_GACCAATTCAGAAATG	CID44971_TGACAACCACCCTATC	CID4513_GTTCTCGAGTACACCT	CID4513_TAGACCAAGTACGCCC	CID4513_CTTGGCTTCTAACGGT	CID4513_TCGGTAAGTCATCGGC	CID4515_ACACTGAAGGATCGCA	CID4515_ACGATACTCCCTAACC	CID4515_ACGATGTCAGTCAGCC	CID4515_CGCGTTTAGGCTAGCA	CID3586_TTCTCCTTCTGAAAGA	CID3586_TTGCCGTAGGCCCTCA	CID44971_AACTTTCTCTGGCGAC	CID44971_ACTTTCAGTTGAGGTG	CID4513_ACTGATGAGCCCGAAA	CID4513_CATGCCTTCATTGCCC	CID4513_AGGCCGTCATTCCTCG	CID4515_AGAGCGAAGTCCATAC	CID4515_CTGAAACTCCGCATAA	CID4515_TAGGCATTCCCAGGTG	CID4471_AACCATGCAGCCAATT	CID4471_TCGTACCGTTACGGAG	CID4513_CTCGAGGCATATGAGA	CID4513_CACAAACGTTGTGGAG	CID4515_ATTATCCAGACACTAA	CID4471_AGTTGGTAGCTTTGGT	CID4513_AGGCCACTCAGAGACG	CID4513_CACCAGGCACCGAAAG	CID4513_CCGTACTGTACGAAAT
M36	CID3921_TCATTTGAGAAGGGTA	CID44971_AGGCCACAGAATGTTG	CID44971_AGATTGCTCAATACCG	CID44971_CGTGTAAAGAGTAATC	CID44971_GCGCCAAGTTTACTCT	CID3921_GGAATAAGTGAAATCA	CID4513_AAGACCTTCTTACCTA	CID3586_CCGGTAGGTCCGAAGA	CID4495_AGCTTGAAGGATTCGG	CID3963_CTTTGCGTCATCACCC	CID4066_GTATTCTGTCTAACGT	CID4066_AGGGAGTTCGTGTAGT	CID44971_GACGGCTCATCGGAAG	CID44971_GTCGTAACATGGTCTA	CID4513_GATGAGGGTAGCGTGA	CID4523_ACTTACTAGACAAAGG	CID4523_ATCATGGGTAAGGGCT	CID4040_ATCATTCGTTAATGAG	CID3586_TGACTTTGTTCTCATT	CID4523_ACATGGTTCAGCACAT	CID3921_CCCTCCTCAGTGAGTG	CID3838_CATTTCACACGCTGCA	CID4495_ATCGAGTAGAAGCCCA	CID4495_GTGCGGTAGATGTTAG	CID4495_CAGCAGCTCCGCAAGC	CID44971_ACACCGGCAAGCTGAG	CID4513_GCCTCTATCACCAGGC	CID4513_CCGTGGAGTTGATTGC	CID4513_TGCCCTACATGAGCGA	CID4513_CTGGTCTCACCAACCG	CID3963_GCAGCCACATTGCGGC	CID4513_CGGACACAGAGTAATC	CID3921_TGTATTCGTTCAGCGC	CID44971_CGAACATTCGCGCCAA	CID4513_TCCCGATGTAGCTAAA	CID4515_CTGTTTAGTCAAACTC	CID4495_TGACTAGGTTCGCTAA	CID4513_GGGATGATCAAACCGT	CID3586_TCTCTAACACGCGAAA	CID3586_TGACTAGCACCGGAAA	CID3921_TGCCCTATCCCACTTG	CID4066_AAGGAGCAGGACACCA	CID4495_CCTAGCTTCCTCAACC	CID4495_TTGTAGGTCGAGAACG	CID4495_TTGTAGGAGGAACTGC	CID4495_CAGATCAGTTTGTGTG	CID4513_ACGGGCTAGTCGAGTG	CID4513_CGATCGGAGGATGTAT	CID4513_TTGGCAATCTATCCTA
[truncated: 206 more rows]
[truncated: 5,000 more columns]

## Sheet: D. MSC Cluster Table
D. Table of MSC identified clusters. For each cluster in each row, it specifies its parent cluster, cluster compactness and size.
cluster.name	module.size	cluster.resolution	compactness.resolution	parent.cluster	compactness.parent	compactness.module	intra.link.ratio	intra.link.pvalue	compactness.parent.infimum	is.compact	is.coherent	is.valid
M1	91558	NA	2.53768	M0	Inf	0.570265	1	0	Inf	TRUE	TRUE	TRUE
M28	3317	0.1625	2.53768	M1	0.571155	0.434936	0.994716	0	0.570265	TRUE	TRUE	TRUE
M29	23433	0.1625	2.53768	M1	0.571155	0.211891	0.997952	0	0.570265	TRUE	TRUE	TRUE
M30	2399	0.1625	2.53768	M1	0.571155	0.345243	0.990852	0	0.570265	TRUE	TRUE	TRUE
M31	5590	0.1625	2.53768	M1	0.571155	0.561789	0.999696	0	0.570265	TRUE	TRUE	TRUE
M32	12856	0.1625	2.53768	M1	0.571155	0.270598	0.997377	0	0.570265	TRUE	TRUE	TRUE
M33	6237	0.1625	2.53768	M1	0.571155	0.403976	0.96464	0	0.570265	TRUE	TRUE	TRUE
M34	4945	0.1625	2.53768	M1	0.571155	0.561876	0.996049	0	0.570265	TRUE	TRUE	TRUE
M35	1897	0.1625	2.53768	M1	0.571155	0.482782	0.951185	0	0.570265	TRUE	TRUE	TRUE
M36	7933	0.1625	2.53768	M1	0.571155	0.448237	0.970276	0	0.570265	TRUE	TRUE	TRUE
M37	13221	0.1625	2.53768	M1	0.571155	0.182416	0.969494	0	0.570265	TRUE	TRUE	TRUE
[truncated: 205 more rows]

## Sheet: E. Jaccard MSC vs Cell Type
E. Jaccard index between MSC clusters and best mapped cell types, minor cell types and subsets by supervised subclustering in Wu et al. 2021.
[truncated: 253 more rows]

[truncated: 4 more sheets: F. Jaccard Index MSC vs SNN, G. M138-specific markers, F. TCGA Clinical & ssGSEA, G. METABRIC Clinical & ssGSEA]
