# Supplementary material for: Unsupervised multi-scale clustering of single-cell transcriptomes to identify hierarchical structures of cell subtypes
Source: Research Square preprint supplement (doi:10.21203/rs.3.rs-5671748/v1), 2024-12-23
Supplement: Supplementary file 2 [file 899492a72afce5d2ef8cdca3.xlsx]

## Sheet: A. PBMC8k meta data
A. Meta data for individual cells from PBMC 8k data set. It includes inferred cell types in column, “inferred.cell.type.broad”, for major cell types from PBMC, and more specific subtypes in “inferred.cell.type.fine”.
barcode	orig.ident	nCount_RNA	nFeature_RNA	sum	detected	subsets_Mito_sum	subsets_Mito_detected	subsets_Mito_percent	total	sizeFactor	inferred.cell.type.fine	inferred.cell.type.broad
GCAGTTAGTTCCATGA	pbmc8k	29165	4999	29165	4999	930	16	3.18875	29165	7.16669	Myeloid dendritic cells	Dendritic cells
GTTAAGCGTACCTACA	pbmc8k	20666	4281	20666	4281	526	13	2.54524	20666	5.07824	NA	Dendritic cells
ACCCACTAGATCGATA	pbmc8k	22825	4219	22825	4219	874	16	3.82913	22825	5.60877	Myeloid dendritic cells	Dendritic cells
CCTTCCCTCATCTGTT	pbmc8k	23788	4668	23788	4668	586	15	2.46343	23788	5.8454	T regulatory cells	Progenitors
TGCCAAATCCAGTAGT	pbmc8k	15414	4000	15414	4000	587	15	3.80823	15414	3.78767	NA	NA
TGTATTCAGAATGTGT	pbmc8k	17804	3872	17804	3872	550	14	3.08919	17804	4.37496	Myeloid dendritic cells	Dendritic cells
CATATGGAGGCTCTTA	pbmc8k	18096	4159	18096	4159	552	13	3.0504	18096	4.44671	Vd2 gd T cells	T cells
GGCTCGAAGAGGTAGA	pbmc8k	19827	4054	19827	4054	509	13	2.56721	19827	4.87207	NA	Dendritic cells
AGATCTGGTGTGCGTC	pbmc8k	23209	4071	23209	4071	655	17	2.82218	23209	5.70313	NA	NA
ATCGAGTTCAGGCAAG	pbmc8k	18249	3751	18249	3751	514	14	2.81659	18249	4.48431	Myeloid dendritic cells	Dendritic cells
AGGGATGCAAAGTCAA	pbmc8k	16865	4366	16865	4366	543	13	3.21969	16865	4.14422	Progenitor cells	Progenitors
CTCTACGCAGTGACAG	pbmc8k	16353	3960	16353	3960	437	15	2.67229	16353	4.01841	Progenitor cells	Progenitors
TGCGGGTGTACCAGTT	pbmc8k	19366	3727	19366	3727	579	14	2.98978	19366	4.75879	Myeloid dendritic cells	Dendritic cells
AGGTCCGAGCTAACTC	pbmc8k	19315	4357	19315	4357	556	16	2.87859	19315	4.74626	Effector memory CD8 T cells	NA
TGCTACCTCCTAGAAC	pbmc8k	16633	3726	16633	3726	556	14	3.34275	16633	4.08721	Myeloid dendritic cells	Dendritic cells
CATATTCCATTAGCCA	pbmc8k	16571	3776	16571	3776	835	14	5.03892	16571	4.07198	Classical monocytes	Monocytes
GTGTGCGCATGCCACG	pbmc8k	18788	4022	18788	4022	729	14	3.88014	18788	4.61676	Myeloid dendritic cells	Dendritic cells
GAAACTCTCTATCCCG	pbmc8k	16586	3774	16586	3774	531	14	3.2015	16586	4.07566	Myeloid dendritic cells	Dendritic cells
GAGGTGAGTTCAGGCC	pbmc8k	16063	3504	16063	3504	521	14	3.24348	16063	3.94715	Myeloid dendritic cells	Dendritic cells
AAGTCTGAGGCACATG	pbmc8k	16613	4102	16613	4102	568	15	3.41901	16613	4.0823	Progenitor cells	Progenitors
AGATCTGAGCTGAACG	pbmc8k	16446	3720	16446	3720	620	14	3.76991	16446	4.04126	Myeloid dendritic cells	Dendritic cells
AGAGCGAAGTGAACGC	pbmc8k	17270	4056	17270	4056	618	16	3.57846	17270	4.24374	T regulatory cells	NA
CTAACTTAGACTTTCG	pbmc8k	16083	3805	16083	3805	593	17	3.68712	16083	3.95206	T regulatory cells	NA
ATTGGTGTCCTTAATC	pbmc8k	16024	3651	16024	3651	505	17	3.15152	16024	3.93756	Myeloid dendritic cells	Dendritic cells
GCAGCCAAGTCCGTAT	pbmc8k	15529	3860	15529	3860	520	14	3.34857	15529	3.81593	NA	NA
ACGAGGAGTGCTAGCC	pbmc8k	17177	3690	17177	3690	632	15	3.67934	17177	4.22089	Myeloid dendritic cells	Dendritic cells
CTCTAATGTGTGAAAT	pbmc8k	14774	3254	14774	3254	354	15	2.3961	14774	3.6304	Myeloid dendritic cells	Dendritic cells
TGGCCAGCATTACGAC	pbmc8k	14859	3756	14859	3756	560	16	3.76876	14859	3.65129	NA	NA
TCTGGAATCCAGTAGT	pbmc8k	15040	3469	15040	3469	388	13	2.57979	15040	3.69577	Myeloid dendritic cells	Dendritic cells
AACTGGTAGTACGCCC	pbmc8k	14103	3585	14103	3585	582	14	4.12678	14103	3.46552	NA	NA
GCCAAATAGATAGTCA	pbmc8k	12128	3370	12128	3370	267	15	2.20152	12128	2.9802	NA	NA
GTGCATAGTAGTACCT	pbmc8k	15328	3761	15328	3761	482	15	3.14457	15328	3.76654	Non-Vd2 gd T cells	NA
ACAGCCGCATCTACGA	pbmc8k	14308	3525	14308	3525	470	14	3.28488	14308	3.51589	NA	Dendritic cells
AGATCTGCACCAGCAC	pbmc8k	14688	3551	14688	3551	372	14	2.53268	14688	3.60927	Myeloid dendritic cells	Dendritic cells
AAAGTAGAGGACTGGT	pbmc8k	15500	3205	15500	3205	403	14	2.6	15500	3.8088	Myeloid dendritic cells	Dendritic cells
AAATGCCGTACCTACA	pbmc8k	13753	2020	13753	2020	205	13	1.49058	13753	3.37951	NA	NA
TAGAGCTAGAATTGTG	pbmc8k	14948	3550	14948	3550	533	15	3.56569	14948	3.67316	Myeloid dendritic cells	Dendritic cells
CGGTTAATCCATGAGT	pbmc8k	14600	3936	14600	3936	356	14	2.43836	14600	3.58765	Progenitor cells	Progenitors
CTGATAGTCACCCGAG	pbmc8k	14456	3482	14456	3482	525	15	3.63171	14456	3.55226	Myeloid dendritic cells	Dendritic cells
GATCGCGTCCTGCTTG	pbmc8k	19385	3823	19385	3823	532	13	2.74439	19385	4.76346	Myeloid dendritic cells	Dendritic cells
CACACCTTCGAGGTAG	pbmc8k	14301	3342	14301	3342	362	13	2.53129	14301	3.51417	Myeloid dendritic cells	Dendritic cells
TGAAAGACAGACAGGT	pbmc8k	14599	3346	14599	3346	433	15	2.96596	14599	3.5874	Non-switched memory B cells	B cells
GCAATCAGTATTACCG	pbmc8k	12052	3047	12052	3047	372	14	3.08662	12052	2.96153	NA	NA
CTAACTTAGAGAGCTC	pbmc8k	13493	3631	13493	3631	371	14	2.74957	13493	3.31562	NA	NA
TTGGAACAGACTTTCG	pbmc8k	13258	3412	13258	3412	415	13	3.13019	13258	3.25788	NA	NA
ACGCAGCGTGTGACCC	pbmc8k	17186	4150	17186	4150	501	15	2.91516	17186	4.2231	Effector memory CD8 T cells	NA
CTGAAACCATTTCACT	pbmc8k	13083	3246	13083	3246	581	14	4.44088	13083	3.21487	NA	NA
GATGCTAAGAAGGACA	pbmc8k	14729	3192	14729	3192	489	15	3.31998	14729	3.61934	Myeloid dendritic cells	Dendritic cells
CTTTGCGCAGCGATCC	pbmc8k	14896	3177	14896	3177	445	13	2.98738	14896	3.66038	Myeloid dendritic cells	Dendritic cells
ACGGGCTAGCGCTTAT	pbmc8k	14994	3439	14994	3439	365	13	2.43431	14994	3.68446	Myeloid dendritic cells	Dendritic cells
TGCGCAGAGGGTGTTG	pbmc8k	14579	3441	14579	3441	413	15	2.83284	14579	3.58249	Exhausted B cells	B cells
TCCCGATTCCAAACTG	pbmc8k	11746	3145	11746	3145	532	15	4.5292	11746	2.88633	NA	Monocytes
CTACGTCCACGACTCG	pbmc8k	14335	3549	14335	3549	408	14	2.84618	14335	3.52253	Myeloid dendritic cells	Dendritic cells
AAGGTTCCACATTTCT	pbmc8k	12717	3185	12717	3185	449	13	3.53071	12717	3.12494	Myeloid dendritic cells	Dendritic cells
CGGCTAGCAGCATGAG	pbmc8k	14793	3227	14793	3227	441	12	2.98114	14793	3.63507	Myeloid dendritic cells	Dendritic cells
TAGGCATGTCGGCACT	pbmc8k	13530	3498	13530	3498	603	14	4.45676	13530	3.32472	NA	Progenitors
GTTCATTTCAGCATGT	pbmc8k	11368	3075	11368	3075	334	14	2.93807	11368	2.79345	Vd2 gd T cells	T cells
AGAGCTTTCTAACTGG	pbmc8k	13648	3189	13648	3189	445	14	3.26055	13648	3.35371	Myeloid dendritic cells	Dendritic cells
CTCGTACAGAAACCTA	pbmc8k	12655	3467	12655	3467	1175	15	9.28487	12655	3.1097	NA	NA
TGGTTAGCACGGTAGA	pbmc8k	12208	3065	12208	3065	443	14	3.62877	12208	2.99986	NA	T cells
ACTGAGTCAACACCTA	pbmc8k	13178	3270	13178	3270	499	14	3.78661	13178	3.23822	Myeloid dendritic cells	Dendritic cells
CCGTTCACATGCCTAA	pbmc8k	13281	3196	13281	3196	448	14	3.37324	13281	3.26353	Myeloid dendritic cells	Dendritic cells
ACGGGCTTCTTTACGT	pbmc8k	12649	2942	12649	2942	402	14	3.17812	12649	3.10823	NA	NA
CAGATCATCTGCTGCT	pbmc8k	13244	3105	13244	3105	535	14	4.03957	13244	3.25444	Myeloid dendritic cells	Dendritic cells
GGTGTTATCACATAGC	pbmc8k	13465	3270	13465	3270	331	13	2.45823	13465	3.30874	Myeloid dendritic cells	Dendritic cells
ACATGGTAGATATGGT	pbmc8k	13537	3476	13537	3476	388	14	2.86622	13537	3.32644	T regulatory cells	NA
GGATTACTCCATGCTC	pbmc8k	11731	3323	11731	3323	246	13	2.09701	11731	2.88265	NA	NA
TATGCCCTCTCATTCA	pbmc8k	15793	3718	15793	3718	398	13	2.5201	15793	3.8808	Myeloid dendritic cells	Dendritic cells
TTAACTCGTCTACCTC	pbmc8k	13085	2991	13085	2991	373	13	2.85059	13085	3.21537	Myeloid dendritic cells	Dendritic cells
CTCGTACCAGTAAGAT	pbmc8k	13129	3210	13129	3210	434	15	3.30566	13129	3.22618	Myeloid dendritic cells	Dendritic cells
ATCATCTCAAGCCATT	pbmc8k	12172	3134	12172	3134	429	16	3.52448	12172	2.99102	Myeloid dendritic cells	Dendritic cells
CATGCCTTCACCCGAG	pbmc8k	13007	3330	13007	3330	419	13	3.22134	13007	3.1962	Myeloid dendritic cells	Dendritic cells
AATCGGTCATCGGACC	pbmc8k	13257	3318	13257	3318	358	15	2.70046	13257	3.25763	Myeloid dendritic cells	Dendritic cells
ACTTACTTCCCACTTG	pbmc8k	13046	3118	13046	3118	459	14	3.51832	13046	3.20578	Myeloid dendritic cells	Dendritic cells
GATCGATCACAACGCC	pbmc8k	13901	3024	13901	3024	445	14	3.20121	13901	3.41588	Myeloid dendritic cells	Dendritic cells
TGAGAGGAGAAGCCCA	pbmc8k	13647	3278	13647	3278	683	18	5.00476	13647	3.35347	Myeloid dendritic cells	NA
GAACCTAGTTGTTTGG	pbmc8k	13038	3130	13038	3130	459	13	3.52048	13038	3.20382	Myeloid dendritic cells	Dendritic cells
GCGAGAATCGCTTGTC	pbmc8k	13948	3738	13948	3738	362	15	2.59535	13948	3.42743	T regulatory cells	NA
GTTCATTTCTTAACCT	pbmc8k	12536	3211	12536	3211	377	14	3.00734	12536	3.08046	Myeloid dendritic cells	Dendritic cells
TAGACCAGTGCAGGTA	pbmc8k	12709	3042	12709	3042	438	13	3.44638	12709	3.12297	Myeloid dendritic cells	Dendritic cells
TACTTGTGTTAAGGGC	pbmc8k	11794	3099	11794	3099	546	15	4.62947	11794	2.89813	NA	Monocytes
GGCCGATGTGATGTGG	pbmc8k	14325	3346	14325	3346	559	13	3.90227	14325	3.52007	Myeloid dendritic cells	Dendritic cells
CACACCTCATGAGCGA	pbmc8k	12623	3332	12623	3332	432	14	3.42232	12623	3.10184	NA	NA
CCTAAAGCAGGTTTCA	pbmc8k	11007	3237	11007	3237	428	13	3.88843	11007	2.70474	NA	NA
TACGGATAGTGCCATT	pbmc8k	13078	3096	13078	3096	372	14	2.84447	13078	3.21365	Myeloid dendritic cells	Dendritic cells
AGAATAGGTAGCAAAT	pbmc8k	12757	3058	12757	3058	517	14	4.05268	12757	3.13477	Myeloid dendritic cells	Dendritic cells
TCAGATGAGCCGATTT	pbmc8k	13885	3361	13885	3361	544	12	3.9179	13885	3.41195	Myeloid dendritic cells	Dendritic cells
TATCTCACATCGGAAG	pbmc8k	14647	3419	14647	3419	482	14	3.29078	14647	3.59919	Myeloid dendritic cells	Dendritic cells
CTCCTAGGTGAGTGAC	pbmc8k	10842	3114	10842	3114	436	14	4.0214	10842	2.6642	NA	Monocytes
CCTTCCCGTTTACTCT	pbmc8k	14007	3141	14007	3141	481	14	3.434	14007	3.44193	Myeloid dendritic cells	Dendritic cells
CTGCTGTGTCAACATC	pbmc8k	12744	3302	12744	3302	406	14	3.18581	12744	3.13157	Myeloid dendritic cells	Dendritic cells
GTATCTTTCAGGATCT	pbmc8k	13354	3082	13354	3082	440	13	3.29489	13354	3.28147	Myeloid dendritic cells	Dendritic cells
ACGTCAATCCCGGATG	pbmc8k	13085	3161	13085	3161	544	12	4.15743	13085	3.21537	Myeloid dendritic cells	Dendritic cells
ACTGAGTAGTATCGAA	pbmc8k	11362	3039	11362	3039	382	14	3.36208	11362	2.79197	NA	NA
AGAGTGGTCGGAGCAA	pbmc8k	13321	3189	13321	3189	449	14	3.37062	13321	3.27336	Myeloid dendritic cells	Dendritic cells
AGAATAGCAATTCCTT	pbmc8k	10034	2884	10034	2884	216	14	2.15268	10034	2.46565	Non-Vd2 gd T cells	T cells
ACGTCAAGTATCTGCA	pbmc8k	11477	3172	11477	3172	524	15	4.56565	11477	2.82023	Intermediate monocytes	Monocytes
GGGCATCGTCGCATAT	pbmc8k	12250	3319	12250	3319	257	15	2.09796	12250	3.01018	NA	Dendritic cells
AAATGCCGTAAATGTG	pbmc8k	10650	3073	10650	3073	457	15	4.29108	10650	2.61702	NA	NA
ACGCAGCCAACACCTA	pbmc8k	9983	3247	9983	3247	535	14	5.35911	9983	2.45311	NA	NA
GGTGTTACAAGAAAGG	pbmc8k	12110	3061	12110	3061	647	14	5.34269	12110	2.97578	Myeloid dendritic cells	NA
TCCACACTCCTTTACA	pbmc8k	11412	2796	11412	2796	219	13	1.91903	11412	2.80426	Th1/Th17 cells	CD4+ T cells
CACTCCAAGTGGTAGC	pbmc8k	13051	3242	13051	3242	401	13	3.07256	13051	3.20701	Myeloid dendritic cells	Dendritic cells
TACGGGCCACGTCAGC	pbmc8k	12767	2958	12767	2958	409	15	3.20357	12767	3.13722	Myeloid dendritic cells	Dendritic cells
GTTACAGTCGTCGTTC	pbmc8k	13073	3132	13073	3132	816	14	6.24187	13073	3.21242	Classical monocytes	Monocytes
ACGGCCACAAGTTAAG	pbmc8k	12885	3235	12885	3235	437	14	3.39154	12885	3.16622	Myeloid dendritic cells	Dendritic cells
GGTGTTAAGTGAAGTT	pbmc8k	12443	2935	12443	2935	496	16	3.98618	12443	3.05761	Myeloid dendritic cells	Dendritic cells
CATCCACCACAACTGT	pbmc8k	10754	2881	10754	2881	313	15	2.91054	10754	2.64257	Th1/Th17 cells	CD4+ T cells
TGCCCTAGTTATGTGC	pbmc8k	12550	3194	12550	3194	318	14	2.53386	12550	3.0839	Myeloid dendritic cells	Dendritic cells
ATCCACCCAATCGGTT	pbmc8k	11907	3211	11907	3211	434	14	3.64491	11907	2.9259	Myeloid dendritic cells	Dendritic cells
CGACCTTGTCCTCCAT	pbmc8k	11094	3158	11094	3158	418	15	3.7678	11094	2.72612	Myeloid dendritic cells	Dendritic cells
TTCGAAGGTAGCGATG	pbmc8k	11748	3025	11748	3025	547	14	4.65611	11748	2.88683	NA	NA
TCAGCTCTCCTGCAGG	pbmc8k	12738	3242	12738	3242	457	12	3.58769	12738	3.1301	Myeloid dendritic cells	Dendritic cells
CAGTAACCAGTCAGAG	pbmc8k	12355	3159	12355	3159	295	14	2.3877	12355	3.03598	Myeloid dendritic cells	Dendritic cells
GCTTCCATCCATTCTA	pbmc8k	12375	2971	12375	2971	459	14	3.70909	12375	3.0409	Myeloid dendritic cells	Dendritic cells
TGCTGCTAGTCATGCT	pbmc8k	12482	3059	12482	3059	402	12	3.22064	12482	3.06719	Myeloid dendritic cells	Dendritic cells
GACGGCTCATCACGAT	pbmc8k	10427	2757	10427	2757	281	14	2.69493	10427	2.56222	Central memory CD8 T cells	T cells
GGAGCAAGTCGCTTCT	pbmc8k	12712	3129	12712	3129	454	14	3.57143	12712	3.12371	Myeloid dendritic cells	Dendritic cells
GCGCCAAAGCTACCGC	pbmc8k	12433	2950	12433	2950	464	12	3.732	12433	3.05515	Myeloid dendritic cells	Dendritic cells
GTTACAGGTAAACACA	pbmc8k	11284	2708	11284	2708	304	14	2.69408	11284	2.77281	Th2 cells	CD4+ T cells
CCACGGATCTCCAGGG	pbmc8k	12609	3171	12609	3171	409	14	3.24371	12609	3.0984	Myeloid dendritic cells	Dendritic cells
CGGACGTAGTGGGCTA	pbmc8k	13029	3287	13029	3287	422	15	3.23893	13029	3.2016	Myeloid dendritic cells	Dendritic cells
TACGGGCGTGATAAAC	pbmc8k	12407	3107	12407	3107	383	15	3.08697	12407	3.04876	Myeloid dendritic cells	Dendritic cells
CGATCGGGTCCAGTAT	pbmc8k	11673	3097	11673	3097	398	13	3.40958	11673	2.8684	NA	NA
TACGGATAGTCTCAAC	pbmc8k	11819	3019	11819	3019	311	14	2.63136	11819	2.90427	Myeloid dendritic cells	Dendritic cells
ACTGATGGTACGAAAT	pbmc8k	11059	2889	11059	2889	356	14	3.2191	11059	2.71752	Progenitor cells	Progenitors
CCCATACCAAGCGATG	pbmc8k	12144	2975	12144	2975	373	13	3.07148	12144	2.98413	Myeloid dendritic cells	Dendritic cells
GCTCCTACAGGTCTCG	pbmc8k	12317	3026	12317	3026	416	14	3.37745	12317	3.02665	Myeloid dendritic cells	Dendritic cells
GACTGCGGTCCGACGT	pbmc8k	12681	2751	12681	2751	421	15	3.31993	12681	3.11609	Myeloid dendritic cells	Dendritic cells
TCTGGAAAGCGATTCT	pbmc8k	10902	2777	10902	2777	283	12	2.59585	10902	2.67894	Vd2 gd T cells	T cells
ACACCCTCACGCCAGT	pbmc8k	11466	2952	11466	2952	433	13	3.77638	11466	2.81753	Myeloid dendritic cells	Dendritic cells
ACGCCAGAGGCCCTTG	pbmc8k	11577	3065	11577	3065	369	13	3.18735	11577	2.84481	Myeloid dendritic cells	Dendritic cells
TGAAAGACAACTGCTA	pbmc8k	9748	2745	9748	2745	433	13	4.44194	9748	2.39537	Vd2 gd T cells	T cells
TGAAAGAGTCCGAAGA	pbmc8k	12353	3115	12353	3115	308	12	2.49332	12353	3.03549	Myeloid dendritic cells	Dendritic cells
CACACCTGTCTAAACC	pbmc8k	11351	2906	11351	2906	428	13	3.77059	11351	2.78927	Myeloid dendritic cells	Dendritic cells
GCAGCCAAGAAGCCCA	pbmc8k	9453	2805	9453	2805	418	16	4.42188	9453	2.32288	MAIT cells	T cells
ACGCCAGAGAACTCGG	pbmc8k	11944	2975	11944	2975	389	14	3.25687	11944	2.93499	Myeloid dendritic cells	Dendritic cells
GGAACTTTCCTAAGTG	pbmc8k	10336	2763	10336	2763	230	15	2.22523	10336	2.53986	Th17 cells	CD4+ T cells
ACGCCAGGTGCGATAG	pbmc8k	10956	2998	10956	2998	323	13	2.94816	10956	2.69221	MAIT cells	T cells
CCACGGATCATAAAGG	pbmc8k	12080	2972	12080	2972	454	14	3.75828	12080	2.96841	Myeloid dendritic cells	Dendritic cells
GACCAATGTGGTCCGT	pbmc8k	12244	3124	12244	3124	304	15	2.48285	12244	3.00871	Myeloid dendritic cells	Dendritic cells
CGTCACTGTGATAAGT	pbmc8k	11485	3379	11485	3379	476	16	4.14454	11485	2.8222	T regulatory cells	CD8+ T cells
GATCTAGAGCCCAACC	pbmc8k	11081	2859	11081	2859	339	13	3.05929	11081	2.72292	NA	NA
GCTGCTTTCCCTAATT	pbmc8k	11658	3003	11658	3003	424	14	3.63699	11658	2.86471	Myeloid dendritic cells	Dendritic cells
GGTATTGGTGTTTGGT	pbmc8k	11588	2719	11588	2719	279	13	2.40766	11588	2.84751	Th17 cells	CD4+ T cells
TGCGCAGCATCCTTGC	pbmc8k	11892	3035	11892	3035	414	14	3.48133	11892	2.92221	Myeloid dendritic cells	Dendritic cells
CAAGGCCCATCCCACT	pbmc8k	11370	3023	11370	3023	331	14	2.91117	11370	2.79394	Myeloid dendritic cells	Dendritic cells
CTCGTCACAACTGGCC	pbmc8k	10419	2865	10419	2865	176	13	1.68922	10419	2.56025	T regulatory cells	CD4+ T cells
GTGGGTCAGAAGATTC	pbmc8k	11260	2955	11260	2955	503	12	4.46714	11260	2.76691	Myeloid dendritic cells	Dendritic cells
CTTACCGCAGCCTATA	pbmc8k	10913	2916	10913	2916	634	15	5.80958	10913	2.68164	NA	NA
CGGCTAGGTTAAAGAC	pbmc8k	11695	2931	11695	2931	672	14	5.74605	11695	2.8738	Myeloid dendritic cells	Dendritic cells
CCCATACCACCTGGTG	pbmc8k	12393	3309	12393	3309	522	15	4.21206	12393	3.04532	NA	NA
ATTGGTGTCCTGTAGA	pbmc8k	12735	3452	12735	3452	460	13	3.61209	12735	3.12936	NA	NA
ACTATCTCAGCCTTTC	pbmc8k	10627	3077	10627	3077	377	14	3.54757	10627	2.61136	Myeloid dendritic cells	Dendritic cells
GGAATAATCATCGGAT	pbmc8k	11386	3203	11386	3203	450	15	3.95222	11386	2.79787	Myeloid dendritic cells	Dendritic cells
CTGCTGTAGTCCATAC	pbmc8k	11231	2833	11231	2833	251	13	2.23489	11231	2.75978	Th1/Th17 cells	CD4+ T cells
GGCTGGTTCTATGTGG	pbmc8k	11379	3121	11379	3121	385	15	3.38343	11379	2.79615	Myeloid dendritic cells	Dendritic cells
TCAGGTATCCTCGCAT	pbmc8k	11796	3095	11796	3095	299	13	2.53476	11796	2.89862	Myeloid dendritic cells	Dendritic cells
CAGCCGACATGTTGAC	pbmc8k	11746	3137	11746	3137	334	13	2.84352	11746	2.88633	Myeloid dendritic cells	Dendritic cells
TAGGCATTCCGAAGAG	pbmc8k	11987	3021	11987	3021	354	13	2.9532	11987	2.94556	Myeloid dendritic cells	Dendritic cells
TGAAAGAAGACTCGGA	pbmc8k	12127	2982	12127	2982	285	14	2.35013	12127	2.97996	Myeloid dendritic cells	Dendritic cells
ACACCCTTCTCGATGA	pbmc8k	11413	2920	11413	2920	427	13	3.74135	11413	2.80451	Myeloid dendritic cells	Dendritic cells
CACACCTTCAGTCCCT	pbmc8k	10418	2823	10418	2823	353	13	3.38837	10418	2.56001	Myeloid dendritic cells	Dendritic cells
CGAACATGTGCAGTAG	pbmc8k	11028	2947	11028	2947	322	15	2.91984	11028	2.7099	Progenitor cells	Progenitors
GGCGACTAGGGCATGT	pbmc8k	9789	2743	9789	2743	233	13	2.38022	9789	2.40544	Th2 cells	CD4+ T cells
CGTAGGCCATAGAAAC	pbmc8k	13454	3069	13454	3069	360	15	2.67578	13454	3.30604	Myeloid dendritic cells	Dendritic cells
CCTTTCTGTGTGAATA	pbmc8k	10997	2839	10997	2839	448	15	4.07384	10997	2.70228	Myeloid dendritic cells	Dendritic cells
ACTGAACTCCACTGGG	pbmc8k	10341	3062	10341	3062	425	13	4.10985	10341	2.54108	NA	NA
GAAACTCAGTTGCAGG	pbmc8k	11518	2752	11518	2752	271	14	2.35284	11518	2.83031	Myeloid dendritic cells	Dendritic cells
AGGTCATAGCTAAGAT	pbmc8k	10826	2769	10826	2769	425	14	3.92573	10826	2.66026	Myeloid dendritic cells	Dendritic cells
GCTGCAGTCGAGCCCA	pbmc8k	11627	3133	11627	3133	372	14	3.19945	11627	2.85709	Myeloid dendritic cells	Dendritic cells
GTGCAGCCACTTACGA	pbmc8k	10862	2986	10862	2986	316	14	2.90922	10862	2.66911	Plasmacytoid dendritic cells	Dendritic cells
TCCACACCAATGCCAT	pbmc8k	9874	3169	9874	3169	207	13	2.09641	9874	2.42633	Non-Vd2 gd T cells	T cells
TTAGGCATCATGCAAC	pbmc8k	12166	3432	12166	3432	440	13	3.61664	12166	2.98954	T regulatory cells	NA
GAATGAACATATGGTC	pbmc8k	9860	2797	9860	2797	373	15	3.78296	9860	2.42289	NA	NA
AGAGCTTCACATTAGC	pbmc8k	11047	2891	11047	2891	384	13	3.47606	11047	2.71457	Myeloid dendritic cells	Dendritic cells
CTAATGGTCCAAACAC	pbmc8k	10236	2727	10236	2727	238	14	2.32513	10236	2.51528	Th17 cells	CD4+ T cells
AGAGCTTCACCAGATT	pbmc8k	11411	2904	11411	2904	398	14	3.48786	11411	2.80402	Myeloid dendritic cells	Dendritic cells
CTCGTCACAAAGGTGC	pbmc8k	9947	3143	9947	3143	362	12	3.63929	9947	2.44427	Central memory CD8 T cells	CD8+ T cells
CCTCTGACATCGATGT	pbmc8k	9795	3105	9795	3105	321	15	3.27718	9795	2.40692	NA	NA
CAACCAAGTCAAACTC	pbmc8k	10788	2841	10788	2841	283	12	2.62329	10788	2.65093	Myeloid dendritic cells	Dendritic cells
TTTATGCTCTCATTCA	pbmc8k	10750	2931	10750	2931	330	14	3.06977	10750	2.64159	Myeloid dendritic cells	Dendritic cells
GTACTTTCATACTACG	pbmc8k	9630	2730	9630	2730	413	13	4.28868	9630	2.36637	Classical monocytes	NA
GGACATTGTCTCAACA	pbmc8k	9827	2687	9827	2687	298	13	3.03246	9827	2.41478	NA	NA
GGAACTTTCAGCCTAA	pbmc8k	10893	2491	10893	2491	305	13	2.79996	10893	2.67673	Th2 cells	CD4+ T cells
TTAGGACCAGCTGCAC	pbmc8k	11392	2696	11392	2696	284	14	2.49298	11392	2.79935	Non-switched memory B cells	B cells
ACCGTAAGTATAGTAG	pbmc8k	10007	2619	10007	2619	505	15	5.04647	10007	2.45901	Myeloid dendritic cells	Dendritic cells
CAGGTGCGTATTACCG	pbmc8k	11733	3003	11733	3003	379	15	3.23021	11733	2.88314	Myeloid dendritic cells	Dendritic cells
AAGGAGCGTGTTGAGG	pbmc8k	11857	2825	11857	2825	361	13	3.04461	11857	2.91361	Myeloid dendritic cells	Dendritic cells
CTGAAACCACACTGCG	pbmc8k	10920	2711	10920	2711	351	13	3.21429	10920	2.68336	Myeloid dendritic cells	Dendritic cells
TTGCGTCCAATGAAAC	pbmc8k	11332	2862	11332	2862	305	15	2.69149	11332	2.7846	Myeloid dendritic cells	Dendritic cells
AAAGCAAAGTGTCTCA	pbmc8k	10805	2853	10805	2853	409	14	3.78528	10805	2.6551	Myeloid dendritic cells	Dendritic cells
ACTGATGTCGCCATAA	pbmc8k	9573	2706	9573	2706	329	14	3.43675	9573	2.35237	Non classical monocytes	Monocytes
AGCATACCATGCTGGC	pbmc8k	11193	2941	11193	2941	394	13	3.52006	11193	2.75045	Myeloid dendritic cells	Dendritic cells
GCTGCTTCAGTACACT	pbmc8k	10794	2591	10794	2591	219	14	2.0289	10794	2.6524	Th1/Th17 cells	CD4+ T cells
GAAACTCTCCAGATCA	pbmc8k	8924	2785	8924	2785	391	13	4.38144	8924	2.19289	Vd2 gd T cells	T cells
TTCTACATCACTTATC	pbmc8k	8288	2348	8288	2348	171	13	2.06322	8288	2.0366	Th2 cells	CD4+ T cells
GGACAGAAGACAAGCC	pbmc8k	10638	2786	10638	2786	291	13	2.73548	10638	2.61407	Myeloid dendritic cells	Dendritic cells
TTAGGCAGTTATGTGC	pbmc8k	11140	3079	11140	3079	341	15	3.06104	11140	2.73742	Myeloid dendritic cells	Dendritic cells
GCATGATCACTACAGT	pbmc8k	9500	2683	9500	2683	342	15	3.6	9500	2.33443	NA	Monocytes
TCATTACTCACTTATC	pbmc8k	8993	2632	8993	2632	307	15	3.41377	8993	2.20984	Non classical monocytes	Monocytes
CGACCTTCAGCTATTG	pbmc8k	10640	2812	10640	2812	362	15	3.40226	10640	2.61456	NA	NA
TGCGGGTTCCTCATTA	pbmc8k	8775	2618	8775	2618	372	13	4.23932	8775	2.15627	Non classical monocytes	Monocytes
CTGAAACAGAACAATC	pbmc8k	8413	2392	8413	2392	231	13	2.74575	8413	2.06732	Naive CD4 T cells	CD4+ T cells
AGGCCACGTACATCCA	pbmc8k	9787	2571	9787	2571	324	14	3.31051	9787	2.40495	NA	Monocytes
GCGCGATAGGACACCA	pbmc8k	11078	3030	11078	3030	393	14	3.54757	11078	2.72219	Myeloid dendritic cells	Dendritic cells
AGAATAGAGAGTAATC	pbmc8k	10106	2727	10106	2727	271	14	2.68158	10106	2.48334	Myeloid dendritic cells	Dendritic cells
ACGATGTAGGGTTTCT	pbmc8k	10743	2625	10743	2625	360	14	3.35102	10743	2.63987	Myeloid dendritic cells	Dendritic cells
CGTTCTGAGTATCGAA	pbmc8k	9404	2648	9404	2648	294	13	3.12633	9404	2.31084	NA	CD4+ T cells
TTAACTCAGAATTGTG	pbmc8k	9707	2425	9707	2425	265	14	2.72999	9707	2.38529	Naive CD8 T cells	CD8+ T cells
GTCCTCATCGTAGGAG	pbmc8k	9782	2878	9782	2878	330	13	3.37354	9782	2.40372	NA	NA
CTGCGGAGTACTCAAC	pbmc8k	11316	2701	11316	2701	404	15	3.57017	11316	2.78067	Myeloid dendritic cells	Dendritic cells
GAATAAGAGTCCATAC	pbmc8k	9000	2474	9000	2474	254	15	2.82222	9000	2.21156	NA	NA
CTCGAGGGTTGAGTTC	pbmc8k	10987	2823	10987	2823	565	15	5.14244	10987	2.69983	Myeloid dendritic cells	Dendritic cells
ACTTGTTGTTGCTCCT	pbmc8k	10535	2771	10535	2771	414	15	3.92976	10535	2.58876	Myeloid dendritic cells	Dendritic cells
TCCACACCAGGAATGC	pbmc8k	10345	2741	10345	2741	332	12	3.20928	10345	2.54207	Myeloid dendritic cells	Dendritic cells
TTGACTTCAGCGAACA	pbmc8k	9815	2511	9815	2511	275	13	2.80183	9815	2.41183	Th17 cells	CD4+ T cells
AGTGAGGCACAGGTTT	pbmc8k	10723	2903	10723	2903	395	13	3.68367	10723	2.63495	Progenitor cells	Progenitors
TTAACTCAGTCAATAG	pbmc8k	8048	2598	8048	2598	364	13	4.52286	8048	1.97763	NA	NA
CAGCTGGTCAGAAATG	pbmc8k	10988	2759	10988	2759	412	13	3.74954	10988	2.70007	Myeloid dendritic cells	Dendritic cells
AGAGCTTGTGCACGAA	pbmc8k	10808	2940	10808	2940	306	16	2.83124	10808	2.65584	Myeloid dendritic cells	Dendritic cells
GTTAAGCTCGTTTAGG	pbmc8k	11196	2927	11196	2927	334	12	2.98321	11196	2.75118	Myeloid dendritic cells	Dendritic cells
CAGATCAAGCGTAATA	pbmc8k	10419	2679	10419	2679	451	14	4.32863	10419	2.56025	Myeloid dendritic cells	Dendritic cells
ACTTGTTAGACTTGAA	pbmc8k	8934	2565	8934	2565	298	15	3.33557	8934	2.19534	NA	NA
AACCATGCATCGATGT	pbmc8k	9930	2788	9930	2788	329	13	3.31319	9930	2.44009	Myeloid dendritic cells	Dendritic cells
ATCACGAGTATGAATG	pbmc8k	10220	2824	10220	2824	315	13	3.08219	10220	2.51135	Myeloid dendritic cells	Dendritic cells
AGAGTGGCAGGTGGAT	pbmc8k	10933	2801	10933	2801	395	14	3.61292	10933	2.68656	NA	NA
TACAGTGCATCCGCGA	pbmc8k	9496	2683	9496	2683	270	14	2.8433	9496	2.33344	Th2 cells	CD4+ T cells
CTAAGACTCACGCGGT	pbmc8k	11170	2667	11170	2667	672	13	6.01611	11170	2.74479	Myeloid dendritic cells	Dendritic cells
GTCCTCAGTCTCAACA	pbmc8k	9101	2490	9101	2490	270	15	2.96671	9101	2.23638	NA	NA
AAGGTTCCACAGATTC	pbmc8k	8733	2418	8733	2418	300	14	3.43525	8733	2.14595	Naive CD4 T cells	CD8+ T cells
CTCGTACTCCTAGTGA	pbmc8k	10721	2891	10721	2891	462	15	4.3093	10721	2.63446	Classical monocytes	Monocytes
CTCGGAGAGACAAAGG	pbmc8k	11008	2922	11008	2922	453	14	4.11519	11008	2.70499	NA	NA
CCAATCCCACTGTGTA	pbmc8k	10458	2730	10458	2730	486	15	4.64716	10458	2.56984	Myeloid dendritic cells	Dendritic cells
CAAGATCGTGTGTGCC	pbmc8k	10101	2715	10101	2715	310	13	3.069	10101	2.48211	MAIT cells	T cells
GGACATTGTGACCAAG	pbmc8k	9451	2604	9451	2604	325	13	3.43879	9451	2.32239	Naive CD4 T cells	CD8+ T cells
AAACGGGTCCCTCAGT	pbmc8k	8521	2733	8521	2733	412	15	4.83511	8521	2.09386	NA	Monocytes
CTACCCAAGTGAACAT	pbmc8k	8923	2634	8923	2634	316	14	3.54141	8923	2.19264	Non classical monocytes	Monocytes
GCTGCAGAGCTAAACA	pbmc8k	10229	2936	10229	2936	357	13	3.49008	10229	2.51356	NA	NA
CTCATTATCTTCGGTC	pbmc8k	9031	2556	9031	2556	313	13	3.46584	9031	2.21918	NA	NA
GAATGAACAAATCCGT	pbmc8k	10391	2701	10391	2701	398	16	3.83024	10391	2.55337	Myeloid dendritic cells	Dendritic cells
TGCACCTGTATCAGTC	pbmc8k	9485	2587	9485	2587	314	13	3.31049	9485	2.33074	NA	NA
ATTCTACCATCGATGT	pbmc8k	10252	2781	10252	2781	350	14	3.41397	10252	2.51922	Myeloid dendritic cells	Dendritic cells
GGCTCGACATTAGGCT	pbmc8k	11474	3176	11474	3176	342	14	2.98065	11474	2.8195	T regulatory cells	NA
TCACAAGTCCTCATTA	pbmc8k	9548	2694	9548	2694	323	14	3.38291	9548	2.34622	NA	NA
AACTCTTAGCTGAAAT	pbmc8k	8354	2278	8354	2278	261	15	3.12425	8354	2.05282	Naive CD4 T cells	CD8+ T cells
GGGTCTGTCAAACCAC	pbmc8k	9340	2649	9340	2649	319	13	3.41542	9340	2.29511	Intermediate monocytes	Monocytes
ATTGGTGCAAGTAATG	pbmc8k	10232	2710	10232	2710	306	13	2.99062	10232	2.5143	Myeloid dendritic cells	Dendritic cells
CTGTTTAAGTCACGCC	pbmc8k	8910	2408	8910	2408	315	14	3.53535	8910	2.18945	NA	NA
TTGACTTAGCACGCCT	pbmc8k	10159	2625	10159	2625	411	13	4.04567	10159	2.49636	Myeloid dendritic cells	Dendritic cells
TGAAAGAGTCCCTACT	pbmc8k	8911	2626	8911	2626	324	16	3.63596	8911	2.18969	Non classical monocytes	Monocytes
CCACCTACAGTCGTGC	pbmc8k	11035	2780	11035	2780	353	16	3.19891	11035	2.71162	NA	NA
GTGAAGGTCCCTTGCA	pbmc8k	10032	2715	10032	2715	391	14	3.89753	10032	2.46515	NA	NA
CCCAGTTTCCCTAACC	pbmc8k	9406	2812	9406	2812	162	17	1.7223	9406	2.31133	Plasmacytoid dendritic cells	Dendritic cells
CGGACACAGAATAGGG	pbmc8k	10166	2755	10166	2755	330	15	3.24611	10166	2.49808	Myeloid dendritic cells	Dendritic cells
AATCCAGGTCCCTACT	pbmc8k	9631	2724	9631	2724	260	14	2.69962	9631	2.36662	Myeloid dendritic cells	Dendritic cells
GCAATCACATGGATGG	pbmc8k	10033	2873	10033	2873	253	13	2.52168	10033	2.4654	Plasmacytoid dendritic cells	Dendritic cells
ATCCACCCAATCTGCA	pbmc8k	9322	2597	9322	2597	414	15	4.44111	9322	2.29069	NA	NA
TCGGGACAGTCTCGGC	pbmc8k	10327	2680	10327	2680	372	13	3.60221	10327	2.53764	Myeloid dendritic cells	Dendritic cells
CGTCACTTCTCGATGA	pbmc8k	10028	2708	10028	2708	266	15	2.65257	10028	2.46417	Myeloid dendritic cells	Dendritic cells
CAGAATCCACGGTGTC	pbmc8k	10080	2609	10080	2609	331	13	3.28373	10080	2.47695	Myeloid dendritic cells	Dendritic cells
ACGTCAAGTGGAAAGA	pbmc8k	9369	2545	9369	2545	269	13	2.87117	9369	2.30224	NA	NA
GGGACCTAGGACGAAA	pbmc8k	10479	2749	10479	2749	330	14	3.14916	10479	2.575	Myeloid dendritic cells	Dendritic cells
ATTGGTGGTTCGCTAA	pbmc8k	9267	2776	9267	2776	444	15	4.79119	9267	2.27717	Classical monocytes	NA
TAGTTGGTCTGACCTC	pbmc8k	8458	2670	8458	2670	334	14	3.94892	8458	2.07838	NA	NA
TCACAAGTCACATAGC	pbmc8k	9782	2830	9782	2830	128	12	1.30853	9782	2.40372	Plasmacytoid dendritic cells	Dendritic cells
AGAGCGAGTCCATGAT	pbmc8k	10198	2844	10198	2844	313	14	3.06923	10198	2.50595	Myeloid dendritic cells	Dendritic cells
CGGACGTTCTTCATGT	pbmc8k	9988	2715	9988	2715	295	12	2.95354	9988	2.45434	Myeloid dendritic cells	Dendritic cells
GACCAATGTGGTCTCG	pbmc8k	10629	2642	10629	2642	474	15	4.4595	10629	2.61185	Myeloid dendritic cells	Dendritic cells
CGGACGTCACCTGGTG	pbmc8k	9074	2880	9074	2880	141	13	1.55389	9074	2.22975	NA	Dendritic cells
CACACAACATCGATTG	pbmc8k	9894	2680	9894	2680	315	13	3.18375	9894	2.43124	Classical monocytes	Monocytes
TCAGCAAGTGGGTCAA	pbmc8k	8886	2590	8886	2590	435	14	4.89534	8886	2.18355	NA	NA
CTACATTTCTGGCGAC	pbmc8k	8906	2381	8906	2381	271	15	3.04289	8906	2.18846	Naive CD8 T cells	CD8+ T cells
TTAGGCATCTATCCTA	pbmc8k	8485	2438	8485	2438	209	15	2.46317	8485	2.08501	Naive CD8 T cells	CD8+ T cells
GATCGTAAGGCCCTTG	pbmc8k	8455	2775	8455	2775	369	15	4.36428	8455	2.07764	NA	NA
GACGTGCTCAGAGACG	pbmc8k	9924	2532	9924	2532	277	14	2.79121	9924	2.43862	Naive CD8 T cells	CD8+ T cells
TCAGATGGTATATGAG	pbmc8k	8325	2598	8325	2598	285	14	3.42342	8325	2.0457	Non classical monocytes	NA
AAGTCTGCATCGTCGG	pbmc8k	8766	2749	8766	2749	188	16	2.14465	8766	2.15406	NA	Monocytes
TTTGTCAAGACTTTCG	pbmc8k	9587	2596	9587	2596	316	13	3.29613	9587	2.35581	NA	NA
TTATGCTCATAAGACA	pbmc8k	8784	2700	8784	2700	289	14	3.29007	8784	2.15848	Vd2 gd T cells	T cells
AATCGGTAGGTGATTA	pbmc8k	10388	2779	10388	2779	391	15	3.76396	10388	2.55263	Myeloid dendritic cells	Dendritic cells
CCGTACTTCATAACCG	pbmc8k	9782	2459	9782	2459	352	15	3.59845	9782	2.40372	NA	NA
ACATCAGCAATGTAAG	pbmc8k	9163	2581	9163	2581	440	13	4.80192	9163	2.25162	Myeloid dendritic cells	Dendritic cells
CCTCAGTAGGATGTAT	pbmc8k	7832	2475	7832	2475	268	13	3.42186	7832	1.92455	Non classical monocytes	Monocytes
TTGGCAAGTGTTAAGA	pbmc8k	10123	2561	10123	2561	446	14	4.40581	10123	2.48752	Non-switched memory B cells	B cells
ACGGCCACAATCTGCA	pbmc8k	8432	2569	8432	2569	280	14	3.32068	8432	2.07199	Vd2 gd T cells	T cells
TGCGGGTAGACAGAGA	pbmc8k	10369	2648	10369	2648	325	15	3.13434	10369	2.54797	Myeloid dendritic cells	Dendritic cells
CACACAAGTAAGGGAA	pbmc8k	8435	2310	8435	2310	269	13	3.18909	8435	2.07273	NA	NA
CCTACACGTCTAAAGA	pbmc8k	8755	2602	8755	2602	397	14	4.53455	8755	2.15136	NA	NA
GAATGAATCAGCATGT	pbmc8k	8502	2256	8502	2256	184	13	2.1642	8502	2.08919	NA	NA
ATCATCTAGTCCGTAT	pbmc8k	8956	2550	8956	2550	318	12	3.55069	8956	2.20075	NA	NA
CATCAAGGTCGACTGC	pbmc8k	8377	2593	8377	2593	262	13	3.12761	8377	2.05847	NA	NA
GGATTACCAGTATGCT	pbmc8k	8583	2310	8583	2310	275	13	3.20401	8583	2.10909	Follicular helper T cells	CD4+ T cells
GTAACGTTCTGCCAGG	pbmc8k	9080	2387	9080	2387	209	13	2.30176	9080	2.23122	Th1/Th17 cells	CD4+ T cells
GAATGAAGTTGCGCAC	pbmc8k	7889	2764	7889	2764	283	14	3.58727	7889	1.93856	Natural killer cells	NA
CGTCACTAGGAGTAGA	pbmc8k	8462	2415	8462	2415	205	13	2.4226	8462	2.07936	NA	NA
GACTACATCGCGATCG	pbmc8k	10622	2698	10622	2698	267	13	2.51365	10622	2.61013	Myeloid dendritic cells	Dendritic cells
CGTCCATGTGACAAAT	pbmc8k	8505	2416	8505	2416	194	14	2.28101	8505	2.08993	Th1/Th17 cells	CD4+ T cells
GGATTACTCTTTACGT	pbmc8k	7675	2482	7675	2482	280	12	3.64821	7675	1.88597	Non classical monocytes	Monocytes
CTGGTCTAGTCCCACG	pbmc8k	9212	2433	9212	2433	231	15	2.5076	9212	2.26366	Th1/Th17 cells	CD4+ T cells
CAGAGAGGTTTACTCT	pbmc8k	9695	2597	9695	2597	291	15	3.00155	9695	2.38234	Classical monocytes	Monocytes
GGACATTCATGGATGG	pbmc8k	9376	2777	9376	2777	194	15	2.06911	9376	2.30396	Progenitor cells	Progenitors
CTGAAGTTCCCATTTA	pbmc8k	8220	2569	8220	2569	226	15	2.74939	8220	2.01989	Non-Vd2 gd T cells	T cells
TGACTTTCACGAAACG	pbmc8k	9128	2524	9128	2524	253	14	2.77169	9128	2.24302	Myeloid dendritic cells	Dendritic cells
TGACTTTTCCGCATCT	pbmc8k	8658	2584	8658	2584	279	13	3.22245	8658	2.12752	Myeloid dendritic cells	Dendritic cells
GAATAAGGTTAGAACA	pbmc8k	7541	2510	7541	2510	215	13	2.85108	7541	1.85304	Non classical monocytes	Monocytes
TGCACCTCAATCGGTT	pbmc8k	8684	2563	8684	2563	403	13	4.64072	8684	2.13391	NA	NA
ACACTGATCATACGGT	pbmc8k	7938	2615	7938	2615	390	13	4.91308	7938	1.9506	NA	NA
CAGCAGCCAGGGATTG	pbmc8k	8894	2480	8894	2480	197	13	2.21498	8894	2.18551	Follicular helper T cells	CD4+ T cells
CATCGAACATTTGCTT	pbmc8k	8399	2519	8399	2519	280	15	3.33373	8399	2.06388	MAIT cells	T cells
CACCACTCATGTCCTC	pbmc8k	9153	2322	9153	2322	223	13	2.43636	9153	2.24916	NA	NA
CTCATTAAGTCTTGCA	pbmc8k	7950	2457	7950	2457	255	12	3.20755	7950	1.95355	Non classical monocytes	Monocytes
GAGCAGATCAAGGCTT	pbmc8k	8201	2815	8201	2815	227	14	2.76796	8201	2.01522	Plasmacytoid dendritic cells	Dendritic cells
GTCGTAAGTCTCCCTA	pbmc8k	10953	2794	10953	2794	317	14	2.89418	10953	2.69147	Myeloid dendritic cells	Dendritic cells
ACGGAGAGTAGGACAC	pbmc8k	9306	2656	9306	2656	404	13	4.34129	9306	2.28676	NA	NA
GTTTCTAGTCTTGTCC	pbmc8k	9025	2634	9025	2634	311	13	3.44598	9025	2.21771	Myeloid dendritic cells	Dendritic cells
CACAAACAGTAGGTGC	pbmc8k	8532	2458	8532	2458	297	15	3.48101	8532	2.09656	Non classical monocytes	Monocytes
CTAACTTTCTGATTCT	pbmc8k	7886	2438	7886	2438	153	12	1.94015	7886	1.93782	MAIT cells	T cells
TCAACGAGTGCAGACA	pbmc8k	8013	2346	8013	2346	180	12	2.24635	8013	1.96903	NA	NA
ATCGAGTTCGGTGTTA	pbmc8k	9146	2508	9146	2508	393	15	4.29696	9146	2.24744	NA	Monocytes
ACGAGGACAATCTACG	pbmc8k	8512	2413	8512	2413	208	14	2.44361	8512	2.09165	MAIT cells	T cells
CAGCATAAGGCTCATT	pbmc8k	9393	2555	9393	2555	473	15	5.03566	9393	2.30813	Classical monocytes	Monocytes
GTGTGCGAGTCGAGTG	pbmc8k	10111	2717	10111	2717	368	13	3.6396	10111	2.48457	Intermediate monocytes	Monocytes
TATCTCATCCACTGGG	pbmc8k	9489	2505	9489	2505	345	14	3.63579	9489	2.33172	Myeloid dendritic cells	Dendritic cells
ACGTCAACACGTGAGA	pbmc8k	9954	2791	9954	2791	501	14	5.03315	9954	2.44599	Central memory CD8 T cells	CD8+ T cells
CAGCAGCAGGTGCACA	pbmc8k	8941	3046	8941	3046	325	16	3.63494	8941	2.19706	T regulatory cells	CD4+ T cells
GTTCATTAGGCTATCT	pbmc8k	8830	2711	8830	2711	272	14	3.08041	8830	2.16979	NA	NA
CTAACTTAGTCATCCA	pbmc8k	8414	2097	8414	2097	159	13	1.88971	8414	2.06756	Naive CD4 T cells	CD4+ T cells
AAGCCGCCAGTCGTGC	pbmc8k	10141	2606	10141	2606	432	13	4.25993	10141	2.49194	Myeloid dendritic cells	Dendritic cells
GCAATCATCCGCGCAA	pbmc8k	8087	2312	8087	2312	509	15	6.29405	8087	1.98721	Non-switched memory B cells	B cells
GACCAATTCTCTGTCG	pbmc8k	7808	2400	7808	2400	322	13	4.12398	7808	1.91865	MAIT cells	NA
TGAGGGATCTGACCTC	pbmc8k	8678	2308	8678	2308	245	13	2.82323	8678	2.13244	Naive CD8 T cells	CD8+ T cells
TAGACCAAGTACGCGA	pbmc8k	8987	2527	8987	2527	293	14	3.26026	8987	2.20837	Myeloid dendritic cells	Dendritic cells
ACGCCGACATTGGGCC	pbmc8k	8892	2532	8892	2532	462	15	5.19568	8892	2.18502	NA	NA
GAAATGAAGTAGCGGT	pbmc8k	8980	2219	8980	2219	239	14	2.66147	8980	2.20665	Th1 cells	CD4+ T cells
ACCCACTCAAGTTCTG	pbmc8k	8821	2554	8821	2554	438	15	4.96542	8821	2.16758	Myeloid dendritic cells	Monocytes
CTTCTCTAGGCTCAGA	pbmc8k	8497	2432	8497	2432	386	14	4.54278	8497	2.08796	NA	NA
GGTGAAGTCCACTCCA	pbmc8k	8136	2312	8136	2312	229	12	2.81465	8136	1.99925	Non-switched memory B cells	B cells
GACACGCGTAGAGCTG	pbmc8k	9832	2697	9832	2697	397	13	4.03784	9832	2.41601	Myeloid dendritic cells	Dendritic cells
GCAGTTAAGGAATTAC	pbmc8k	7837	2367	7837	2367	381	13	4.86155	7837	1.92578	Classical monocytes	NA
CTCGAAATCGTTGCCT	pbmc8k	8541	2194	8541	2194	193	13	2.25969	8541	2.09877	Naive CD8 T cells	CD8+ T cells
TGAGCATGTTAGAACA	pbmc8k	7767	2427	7767	2427	230	12	2.96125	7767	1.90858	Vd2 gd T cells	T cells
AGCCTAAGTATATGAG	pbmc8k	7274	2262	7274	2262	222	13	3.05197	7274	1.78743	Non classical monocytes	Monocytes
ACTATCTCATCTATGG	pbmc8k	7841	2571	7841	2571	162	13	2.06606	7841	1.92676	Plasmacytoid dendritic cells	Dendritic cells
ATTACTCCAGATAATG	pbmc8k	7867	2284	7867	2284	190	14	2.41515	7867	1.93315	Th2 cells	CD4+ T cells
CGGCTAGGTCGAGTTT	pbmc8k	9203	2594	9203	2594	349	14	3.79224	9203	2.26145	Progenitor cells	Progenitors
GTATCTTGTGAACCTT	pbmc8k	7720	2140	7720	2140	284	13	3.67876	7720	1.89703	NA	NA
CTTTGCGGTCCAACTA	pbmc8k	9016	2651	9016	2651	470	16	5.21295	9016	2.21549	NA	NA
GATCGATCAACTGGCC	pbmc8k	7921	2301	7921	2301	212	12	2.67643	7921	1.94642	Exhausted B cells	B cells
GTCGTAATCACAACGT	pbmc8k	9057	2396	9057	2396	217	12	2.39594	9057	2.22557	Naive CD8 T cells	CD8+ T cells
ACATACGGTGGTACAG	pbmc8k	8083	2476	8083	2476	238	14	2.94445	8083	1.98623	MAIT cells	T cells
TGTGTTTCATATACGC	pbmc8k	10067	2607	10067	2607	299	13	2.9701	10067	2.47376	Myeloid dendritic cells	Monocytes
CTAGCCTTCGATCCCT	pbmc8k	7334	2412	7334	2412	241	13	3.28606	7334	1.80218	Non-switched memory B cells	B cells
ACGATGTCAAACTGTC	pbmc8k	7996	2236	7996	2236	252	13	3.15158	7996	1.96485	Naive CD4 T cells	CD4+ T cells
TGAGCATTCGACCAGC	pbmc8k	9288	2748	9288	2748	207	13	2.22868	9288	2.28233	T regulatory cells	CD4+ T cells
GACGCGTCAGGGTACA	pbmc8k	10034	2338	10034	2338	247	12	2.46163	10034	2.46565	Myeloid dendritic cells	Dendritic cells
AAACGGGTCTTCTGGC	pbmc8k	7667	2483	7667	2483	234	14	3.05204	7667	1.88401	NA	NK cells
GATCGCGGTGAAAGAG	pbmc8k	8204	2195	8204	2195	353	13	4.30278	8204	2.01596	NA	NA
ATCTGCCTCCATGCTC	pbmc8k	9169	2416	9169	2416	336	15	3.66452	9169	2.25309	Classical monocytes	Dendritic cells
TTCTCCTGTATATGAG	pbmc8k	7669	2190	7669	2190	217	13	2.82957	7669	1.8845	Naive CD8 T cells	CD8+ T cells
AAATGCCAGTAGTGCG	pbmc8k	8564	2335	8564	2335	258	14	3.01261	8564	2.10442	Th1/Th17 cells	CD8+ T cells
TCAGATGGTTCCCGAG	pbmc8k	8762	2572	8762	2572	331	15	3.77768	8762	2.15308	Myeloid dendritic cells	Dendritic cells
AGCATACGTCGCTTTC	pbmc8k	8060	2305	8060	2305	305	12	3.78412	8060	1.98058	Non classical monocytes	Monocytes
TCTTTCCGTGATAAAC	pbmc8k	8322	2354	8322	2354	338	14	4.06152	8322	2.04496	Classical monocytes	Monocytes
ATTTCTGCATTTGCTT	pbmc8k	7774	2435	7774	2435	254	13	3.2673	7774	1.9103	Non classical monocytes	Monocytes
TCTTCGGAGACATAAC	pbmc8k	9004	2288	9004	2288	281	13	3.12084	9004	2.21255	Naive CD8 T cells	CD8+ T cells
TTAGGCAGTTAAGACA	pbmc8k	7556	2172	7556	2172	226	15	2.991	7556	1.85673	Naive B cells	B cells
GATGCTATCAACACTG	pbmc8k	7138	2501	7138	2501	184	14	2.57775	7138	1.75401	Vd2 gd T cells	T cells
CCCTCCTTCGCCTGAG	pbmc8k	7927	2583	7927	2583	299	13	3.77192	7927	1.94789	NA	NA
CTCGTCATCTGTCCGT	pbmc8k	7911	2319	7911	2319	177	12	2.23739	7911	1.94396	Naive CD4 T cells	CD4+ T cells
GGTATTGAGGTACTCT	pbmc8k	7853	2322	7853	2322	219	13	2.78874	7853	1.92971	Non-switched memory B cells	B cells
GCAATCACAATGTTGC	pbmc8k	7968	2531	7968	2531	78	12	0.978916	7968	1.95797	Plasmacytoid dendritic cells	Dendritic cells
GAACGGATCATAACCG	pbmc8k	8040	2234	8040	2234	258	13	3.20896	8040	1.97566	Central memory CD8 T cells	CD8+ T cells
ACATGGTGTTAAGATG	pbmc8k	7190	2134	7190	2134	215	14	2.99026	7190	1.76679	Th1/Th17 cells	CD4+ T cells
ATCGAGTTCTTACCTA	pbmc8k	8625	2781	8625	2781	399	15	4.62609	8625	2.11941	NA	NA
ATGCGATGTCACAAGG	pbmc8k	8698	2673	8698	2673	242	14	2.78225	8698	2.13735	Progenitor cells	Progenitors
TGATTTCTCACTCCTG	pbmc8k	8223	2596	8223	2596	507	16	6.16563	8223	2.02063	Classical monocytes	Monocytes
CTCGGGACACTAAGTC	pbmc8k	7704	2317	7704	2317	251	13	3.25805	7704	1.8931	Naive CD4 T cells	CD8+ T cells
GTTCGGGAGTAAGTAC	pbmc8k	7860	2157	7860	2157	278	14	3.5369	7860	1.93143	NA	NA
AACGTTGTCGCATGAT	pbmc8k	7779	2665	7779	2665	223	13	2.86669	7779	1.91153	Natural killer cells	NK cells
ATCTGCCGTTACTGAC	pbmc8k	7887	2240	7887	2240	101	13	1.28059	7887	1.93807	Th2 cells	CD4+ T cells
GCGGGTTAGTACCGGA	pbmc8k	9510	2546	9510	2546	276	13	2.90221	9510	2.33688	Myeloid dendritic cells	Monocytes
CTTCTCTTCCAAATGC	pbmc8k	6424	2241	6424	2241	252	13	3.92279	6424	1.57856	Naive B cells	B cells
CCTACACAGCTACCGC	pbmc8k	7673	2221	7673	2221	220	13	2.8672	7673	1.88548	Central memory CD8 T cells	CD8+ T cells
TTTGTCACAGCTCCGA	pbmc8k	8236	2319	8236	2319	191	13	2.31909	8236	2.02383	Th1/Th17 cells	CD4+ T cells
TAGTGGTAGCAGACTG	pbmc8k	7771	2387	7771	2387	187	12	2.40638	7771	1.90956	Vd2 gd T cells	T cells
CTACCCACAACTGCTA	pbmc8k	7193	2259	7193	2259	274	13	3.80926	7193	1.76753	Non classical monocytes	Monocytes
ACACCAACAAAGGTGC	pbmc8k	8339	2252	8339	2252	255	15	3.05792	8339	2.04914	Naive CD8 T cells	CD8+ T cells
CGGAGCTCAAACCCAT	pbmc8k	8037	2334	8037	2334	254	14	3.16038	8037	1.97493	NA	NK cells
CCTAGCTCATAGACTC	pbmc8k	7425	2349	7425	2349	189	14	2.54545	7425	1.82454	Vd2 gd T cells	T cells
CTAACTTGTCTCGTTC	pbmc8k	8125	2451	8125	2451	300	15	3.69231	8125	1.99655	Non classical monocytes	Monocytes
CACATAGAGACCCACC	pbmc8k	9041	2519	9041	2519	271	12	2.99746	9041	2.22164	NA	NA
TTGTAGGAGTGTACGG	pbmc8k	9656	2802	9656	2802	265	13	2.74441	9656	2.37276	T regulatory cells	CD4+ T cells
TCACAAGCATTAGGCT	pbmc8k	7981	2452	7981	2452	298	13	3.73387	7981	1.96116	NA	Monocytes
CGTGAGCTCGCATGGC	pbmc8k	10027	2584	10027	2584	453	14	4.5178	10027	2.46393	Myeloid dendritic cells	Dendritic cells
GAGTCCGAGAGCAATT	pbmc8k	8180	2486	8180	2486	193	15	2.35941	8180	2.01006	Vd2 gd T cells	T cells
GTATCTTGTCTCTTTA	pbmc8k	8272	2402	8272	2402	284	15	3.43327	8272	2.03267	NA	NA
AAGTCTGAGGTTCCTA	pbmc8k	8844	2559	8844	2559	418	13	4.72637	8844	2.17323	Myeloid dendritic cells	Dendritic cells
AACTGGTTCACTTATC	pbmc8k	7167	2112	7167	2112	257	14	3.58588	7167	1.76114	NA	NA
GTGGGTCCAGTATAAG	pbmc8k	9469	2596	9469	2596	460	15	4.85796	9469	2.32681	NA	Monocytes
GCCTCTACATGCTAGT	pbmc8k	8184	2358	8184	2358	203	15	2.48045	8184	2.01105	Naive CD8 T cells	CD8+ T cells
ATAGACCGTTCAACCA	pbmc8k	7468	2111	7468	2111	252	15	3.3744	7468	1.83511	Non-switched memory B cells	B cells
GTATCTTTCAGTGCAT	pbmc8k	8854	2612	8854	2612	378	14	4.26926	8854	2.17569	Myeloid dendritic cells	Monocytes
TACTTGTGTTCCACGG	pbmc8k	8076	2275	8076	2275	282	13	3.49183	8076	1.98451	Th1/Th17 cells	T cells
GCAGTTATCCCGACTT	pbmc8k	7846	2449	7846	2449	293	13	3.73439	7846	1.92799	Non classical monocytes	Monocytes
GTCTTCGTCTGTCTAT	pbmc8k	8198	2277	8198	2277	186	13	2.26885	8198	2.01449	Th17 cells	CD4+ T cells
AGGGAGTCATATGCTG	pbmc8k	8146	2249	8146	2249	300	14	3.68279	8146	2.00171	Vd2 gd T cells	T cells
CACACAAGTGACCAAG	pbmc8k	7011	2388	7011	2388	148	14	2.11097	7011	1.72281	T regulatory cells	CD4+ T cells
TTTGGTTTCAGCGATT	pbmc8k	8740	2617	8740	2617	284	13	3.24943	8740	2.14767	NA	NA
TGACAACAGGAGTAGA	pbmc8k	7725	2450	7725	2450	100	12	1.2945	7725	1.89826	T regulatory cells	CD4+ T cells
GCATGATCAGGTCCAC	pbmc8k	7734	2504	7734	2504	195	14	2.52133	7734	1.90047	NA	NA
CTAGTGACAAACCTAC	pbmc8k	8325	2452	8325	2452	310	14	3.72372	8325	2.0457	Myeloid dendritic cells	Dendritic cells
GCGCCAACAACTTGAC	pbmc8k	8119	2302	8119	2302	226	13	2.78359	8119	1.99507	NA	NA
TAGAGCTAGCCACGTC	pbmc8k	8077	2540	8077	2540	233	14	2.88473	8077	1.98475	NA	NA
GCAGCCATCATAAAGG	pbmc8k	7884	2407	7884	2407	354	15	4.49011	7884	1.93733	NA	Monocytes
GCGCAGTTCCATTCTA	pbmc8k	6962	2325	6962	2325	170	13	2.44183	6962	1.71077	T regulatory cells	CD4+ T cells
ACTGTCCAGCACGCCT	pbmc8k	8055	2302	8055	2302	251	12	3.11608	8055	1.97935	Vd2 gd T cells	T cells
GGGTCTGAGGTGCAAC	pbmc8k	8447	2153	8447	2153	168	13	1.98887	8447	2.07567	Th2 cells	CD4+ T cells
TGGCGCAAGTACCGGA	pbmc8k	7968	2179	7968	2179	263	13	3.3007	7968	1.95797	NA	NA
GCAATCAAGGCCATAG	pbmc8k	7596	2138	7596	2138	291	16	3.83096	7596	1.86656	NA	NA
AACGTTGTCGAATGGG	pbmc8k	8688	2497	8688	2497	417	16	4.79972	8688	2.13489	Myeloid dendritic cells	Dendritic cells
GGGTTGCTCTATCCTA	pbmc8k	7856	2372	7856	2372	232	12	2.95316	7856	1.93045	Vd2 gd T cells	T cells
GTACGTAGTTGGTGGA	pbmc8k	8021	2209	8021	2209	228	13	2.84254	8021	1.97099	NA	NA
CGAACATGTAAGTTCC	pbmc8k	7038	2258	7038	2258	239	13	3.39585	7038	1.72944	Non-switched memory B cells	B cells
GTTAAGCTCCTTAATC	pbmc8k	7978	2475	7978	2475	236	15	2.95813	7978	1.96043	T regulatory cells	CD4+ T cells
CCACCTAGTTCCCGAG	pbmc8k	7589	2260	7589	2260	298	14	3.92674	7589	1.86484	NA	NA
GACAGAGAGTCGTACT	pbmc8k	9068	2557	9068	2557	460	13	5.07278	9068	2.22827	Myeloid dendritic cells	Dendritic cells
TCTTCGGTCCATGCTC	pbmc8k	7246	2496	7246	2496	266	13	3.67099	7246	1.78055	NA	NA
AGGGTGACAATGAAAC	pbmc8k	8312	2273	8312	2273	337	13	4.05438	8312	2.0425	Classical monocytes	Monocytes
CTAAGACTCCGTAGGC	pbmc8k	7906	2485	7906	2485	359	14	4.54086	7906	1.94273	NA	NA
CTGATAGTCACAGGCC	pbmc8k	8597	2373	8597	2373	427	14	4.96685	8597	2.11253	Intermediate monocytes	Monocytes
CTAAGACTCTGTCTAT	pbmc8k	6821	2173	6821	2173	219	12	3.21067	6821	1.67612	Naive CD4 T cells	CD8+ T cells
CCGGGATCAAAGGAAG	pbmc8k	8227	2426	8227	2426	194	13	2.35809	8227	2.02161	Central memory CD8 T cells	T cells
GCATACAAGCGATGAC	pbmc8k	8528	2599	8528	2599	287	15	3.36538	8528	2.09558	Classical monocytes	Monocytes
TACTTGTGTGTGGCTC	pbmc8k	8789	2562	8789	2562	216	12	2.45762	8789	2.15971	Non classical monocytes	Monocytes
AGGGTGAAGAGGGCTT	pbmc8k	7870	2252	7870	2252	261	14	3.31639	7870	1.93389	NA	NA
AGGGTGATCCTGTACC	pbmc8k	7481	2326	7481	2326	328	14	4.38444	7481	1.8383	Non classical monocytes	Monocytes
TGTGGTATCTGATTCT	pbmc8k	7154	2375	7154	2375	171	15	2.39027	7154	1.75795	NA	NK cells
CGCCAAGTCGGTCTAA	pbmc8k	7762	2223	7762	2223	290	14	3.73615	7762	1.90735	Non-switched memory B cells	B cells
GGATTACAGCCAGTAG	pbmc8k	7598	2264	7598	2264	209	13	2.75072	7598	1.86705	Th1/Th17 cells	CD4+ T cells
CCTTCCCCAATAGCAA	pbmc8k	8448	2429	8448	2429	297	14	3.51562	8448	2.07592	Myeloid dendritic cells	Dendritic cells
TAAGAGACAGGGCATA	pbmc8k	8545	2392	8545	2392	334	14	3.90872	8545	2.09976	Classical monocytes	Monocytes
AAGTCTGAGCTAGTTC	pbmc8k	7745	2745	7745	2745	261	12	3.36992	7745	1.90317	Plasmacytoid dendritic cells	Dendritic cells
AGAGTGGCACTCTGTC	pbmc8k	9263	2291	9263	2291	340	13	3.67052	9263	2.27619	Myeloid dendritic cells	Dendritic cells
ACTGAACCAACTGGCC	pbmc8k	7192	2440	7192	2440	174	17	2.41935	7192	1.76728	Plasmacytoid dendritic cells	Dendritic cells
CAAGAAAGTTAAGTAG	pbmc8k	6744	2358	6744	2358	148	12	2.19454	6744	1.6572	Vd2 gd T cells	CD8+ T cells
TAGTTGGGTTCAGACT	pbmc8k	8679	2645	8679	2645	440	13	5.06971	8679	2.13268	NA	NA
TTCTACACACGTAAGG	pbmc8k	8295	2384	8295	2384	464	13	5.59373	8295	2.03832	Intermediate monocytes	Monocytes
AGGCCGTAGTAATCCC	pbmc8k	9070	2478	9070	2478	386	16	4.25579	9070	2.22876	Classical monocytes	Monocytes
CGAACATAGCCGATTT	pbmc8k	8606	2505	8606	2505	317	13	3.68348	8606	2.11474	Myeloid dendritic cells	Monocytes
CCGTACTGTAAATACG	pbmc8k	6558	2083	6558	2083	269	14	4.10186	6558	1.61149	Non-switched memory B cells	B cells
AGGCCACTCATCTGCC	pbmc8k	7786	2398	7786	2398	141	13	1.81094	7786	1.91325	NA	NK cells
ACGCCGAGTCATCCCT	pbmc8k	7632	2287	7632	2287	210	13	2.75157	7632	1.8754	NA	NA
CCAATCCAGAAACCAT	pbmc8k	6560	2216	6560	2216	208	14	3.17073	6560	1.61198	Natural killer cells	NA
ACTTGTTAGGATTCGG	pbmc8k	7364	2333	7364	2333	286	14	3.88376	7364	1.80955	NA	NA
CCTAGCTTCCCATTAT	pbmc8k	7482	2308	7482	2308	348	16	4.65116	7482	1.83855	Non classical monocytes	Monocytes
GACGTTAAGACACTAA	pbmc8k	7257	2434	7257	2434	131	13	1.80515	7257	1.78326	Plasmacytoid dendritic cells	Dendritic cells
CAGGTGCTCCCGACTT	pbmc8k	8126	2358	8126	2358	259	13	3.1873	8126	1.99679	Myeloid dendritic cells	Dendritic cells
CCTATTACATCTACGA	pbmc8k	6205	1881	6205	1881	195	13	3.14263	6205	1.52475	Naive CD4 T cells	CD4+ T cells
GCTTGAAAGCGTAATA	pbmc8k	7756	2341	7756	2341	240	13	3.09438	7756	1.90588	MAIT cells	T cells
GCGCAGTCAGTTCCCT	pbmc8k	7273	2509	7273	2509	182	14	2.50241	7273	1.78719	NA	NK cells
CTGCCTAAGAAACGCC	pbmc8k	7645	2451	7645	2451	263	13	3.44016	7645	1.8786	NA	NA
GTACGTAAGAGACGAA	pbmc8k	7526	2348	7526	2348	219	13	2.90991	7526	1.84936	Vd2 gd T cells	T cells
ACTATCTGTGGTCCGT	pbmc8k	8823	2538	8823	2538	210	14	2.38014	8823	2.16807	Th2 cells	NA
TACTCGCGTGTTAAGA	pbmc8k	9590	2490	9590	2490	345	13	3.5975	9590	2.35654	Intermediate monocytes	Monocytes
TTGGCAATCACTGGGC	pbmc8k	7589	2308	7589	2308	316	14	4.16392	7589	1.86484	Non classical monocytes	Monocytes
TTCTACAGTGTATGGG	pbmc8k	7551	2852	7551	2852	264	14	3.49623	7551	1.8555	Natural killer cells	NA
ATCATCTCACATTCGA	pbmc8k	7560	2240	7560	2240	282	13	3.73016	7560	1.85771	NA	NA
AGCGGTCGTGGGTCAA	pbmc8k	8591	2496	8591	2496	417	14	4.85392	8591	2.11106	Classical monocytes	NA
TAGACCAAGGTGCACA	pbmc8k	7648	2390	7648	2390	263	13	3.43881	7648	1.87934	Non classical monocytes	Monocytes
TCGTAGACAGGTTTCA	pbmc8k	7787	2394	7787	2394	161	14	2.06755	7787	1.91349	Vd2 gd T cells	T cells
CGAATGTTCAACGAAA	pbmc8k	7287	2149	7287	2149	185	12	2.53877	7287	1.79063	NA	NA
ATTTCTGTCCGAATGT	pbmc8k	7986	2519	7986	2519	151	13	1.89081	7986	1.96239	Plasmacytoid dendritic cells	Dendritic cells
CAACCTCCAAGCCTAT	pbmc8k	6902	2083	6902	2083	208	13	3.01362	6902	1.69602	NA	NA
CTTAGGATCGCGGATC	pbmc8k	9885	2497	9885	2497	296	13	2.99444	9885	2.42903	Myeloid dendritic cells	Dendritic cells
CTTTGCGCAGTCAGAG	pbmc8k	8017	2443	8017	2443	158	14	1.97081	8017	1.97001	Vd2 gd T cells	T cells
GTTCGGGAGCCATCGC	pbmc8k	8219	2369	8219	2369	340	15	4.13676	8219	2.01965	Non classical monocytes	Monocytes
GAGTCCGAGGAGTTGC	pbmc8k	8928	2293	8928	2293	161	13	1.80332	8928	2.19387	Th1/Th17 cells	CD4+ T cells
GGTGAAGGTGGTACAG	pbmc8k	7773	2356	7773	2356	229	13	2.9461	7773	1.91005	Non classical monocytes	Monocytes
TCCACACTCCTGCTTG	pbmc8k	7355	2329	7355	2329	264	14	3.58939	7355	1.80734	Non classical monocytes	Monocytes
TGCGTGGGTGACCAAG	pbmc8k	7522	2449	7522	2449	239	13	3.17735	7522	1.84837	Non classical monocytes	Monocytes
CCCATACAGTGGTAGC	pbmc8k	7997	2437	7997	2437	515	17	6.43991	7997	1.9651	Classical monocytes	Monocytes
CCTATTATCACGCGGT	pbmc8k	7441	2319	7441	2319	386	15	5.18747	7441	1.82847	Intermediate monocytes	Monocytes
GGCTGGTTCGTTGCCT	pbmc8k	7850	2409	7850	2409	243	14	3.09554	7850	1.92897	Non classical monocytes	Monocytes
ATTATCCGTAGAAAGG	pbmc8k	6733	2090	6733	2090	216	14	3.20808	6733	1.65449	NA	NA
TACCTATTCTTGAGGT	pbmc8k	8672	2285	8672	2285	346	14	3.98985	8672	2.13096	NA	NA
CGACTTCGTATGAAAC	pbmc8k	7358	2438	7358	2438	311	13	4.22669	7358	1.80807	Vd2 gd T cells	T cells
TGCTGCTCATGACATC	pbmc8k	7357	2184	7357	2184	158	13	2.14761	7357	1.80783	Naive CD4 T cells	CD8+ T cells
GACAGAGGTTGGTGGA	pbmc8k	7905	2044	7905	2044	199	14	2.51739	7905	1.94249	Naive CD4 T cells	CD4+ T cells
CTGATAGGTTGAGGTG	pbmc8k	8171	2366	8171	2366	327	15	4.00196	8171	2.00785	Intermediate monocytes	Monocytes
AGTGTCAGTTGAGTTC	pbmc8k	7828	2296	7828	2296	346	13	4.42003	7828	1.92357	NA	NA
TACTTGTCATCAGTCA	pbmc8k	6538	2331	6538	2331	347	14	5.30743	6538	1.60658	NA	NA
TGCCCATTCATCGATG	pbmc8k	7617	2056	7617	2056	205	14	2.69135	7617	1.87172	Naive B cells	B cells
ACTATCTTCAGATAAG	pbmc8k	6816	2264	6816	2264	327	14	4.79754	6816	1.67489	Non classical monocytes	Monocytes
TGACAACTCTAACTGG	pbmc8k	6919	2383	6919	2383	173	13	2.50036	6919	1.7002	NA	NA
ACTGCTCTCCCGACTT	pbmc8k	7299	2257	7299	2257	293	15	4.01425	7299	1.79358	Intermediate monocytes	Monocytes
AGCATACCAATGACCT	pbmc8k	6586	2240	6586	2240	309	12	4.69177	6586	1.61837	Classical monocytes	Monocytes
CTGAAGTCAACTGGCC	pbmc8k	7782	2000	7782	2000	174	13	2.23593	7782	1.91226	Naive CD8 T cells	CD8+ T cells
GATTCAGAGCACCGCT	pbmc8k	6238	2177	6238	2177	702	14	11.2536	6238	1.53286	Classical monocytes	Monocytes
CAGATCAAGCCAGGAT	pbmc8k	7962	2283	7962	2283	307	15	3.85582	7962	1.9565	Classical monocytes	Monocytes
TTGACTTGTTTGTTGG	pbmc8k	8041	2466	8041	2466	307	13	3.81793	8041	1.97591	Myeloid dendritic cells	Dendritic cells
GAACGGAAGGCTCAGA	pbmc8k	9366	2570	9366	2570	447	17	4.77258	9366	2.3015	Classical monocytes	Monocytes
GGGTCTGCACATGGGA	pbmc8k	7704	2266	7704	2266	168	14	2.18069	7704	1.8931	NA	CD4+ T cells
TCGTAGAGTCAACTGT	pbmc8k	8114	2370	8114	2370	215	12	2.64974	8114	1.99385	Non classical monocytes	Monocytes
TGATTTCAGCAATATG	pbmc8k	7961	2411	7961	2411	362	14	4.54717	7961	1.95625	Classical monocytes	Monocytes
CGTCAGGCACTGTCGG	pbmc8k	7357	2511	7357	2511	199	14	2.70491	7357	1.80783	Vd2 gd T cells	T cells
GCGAGAAGTCCGACGT	pbmc8k	7317	2467	7317	2467	230	15	3.14336	7317	1.798	Non-Vd2 gd T cells	T cells
GTTACAGGTAACGACG	pbmc8k	6693	2089	6693	2089	147	12	2.19632	6693	1.64467	Naive B cells	B cells
TTAACTCGTTCCGTCT	pbmc8k	6829	2112	6829	2112	250	14	3.66086	6829	1.67808	Naive B cells	B cells
CAGCTGGTCACGGTTA	pbmc8k	7614	2318	7614	2318	285	13	3.7431	7614	1.87098	Non classical monocytes	Monocytes
TGACAACAGGAATCGC	pbmc8k	8073	2137	8073	2137	310	15	3.83996	8073	1.98377	MAIT cells	T cells
CGTTAGAAGCTGGAAC	pbmc8k	6958	2006	6958	2006	188	13	2.70193	6958	1.70978	Naive CD4 T cells	CD4+ T cells
GTGTTAGAGACAGACC	pbmc8k	7935	2478	7935	2478	457	14	5.75929	7935	1.94986	Intermediate monocytes	Monocytes
TGACTTTTCACCAGGC	pbmc8k	6988	2166	6988	2166	167	14	2.38981	6988	1.71716	Naive CD4 T cells	CD8+ T cells
GTCCTCATCAGTTGAC	pbmc8k	7073	2242	7073	2242	259	13	3.66181	7073	1.73804	MAIT cells	NA
ACCAGTAAGCCAGGAT	pbmc8k	7481	2067	7481	2067	190	12	2.53977	7481	1.8383	Th2 cells	CD4+ T cells
CTCACACGTACTTAGC	pbmc8k	7475	2520	7475	2520	137	13	1.83278	7475	1.83683	Plasmacytoid dendritic cells	Dendritic cells
ATTCTACCAAATACAG	pbmc8k	7978	2345	7978	2345	355	13	4.44974	7978	1.96043	Classical monocytes	Monocytes
CTGTTTATCGGAAATA	pbmc8k	8739	2476	8739	2476	293	12	3.35279	8739	2.14743	Myeloid dendritic cells	Dendritic cells
CCGGGATTCATAGCAC	pbmc8k	7149	2149	7149	2149	239	12	3.34312	7149	1.75672	NA	NA
CAGCTGGAGATCTGCT	pbmc8k	7553	2074	7553	2074	130	13	1.72117	7553	1.85599	Th1/Th17 cells	CD4+ T cells
CTCGAAACACTGTGTA	pbmc8k	7264	2169	7264	2169	180	13	2.47797	7264	1.78498	NA	NA
AACTGGTTCATAAAGG	pbmc8k	6208	2214	6208	2214	282	14	4.54253	6208	1.52549	Non classical monocytes	Monocytes
GTATCTTGTCACTGGC	pbmc8k	7011	2066	7011	2066	264	14	3.76551	7011	1.72281	NA	B cells
CTGCGGACAGATAATG	pbmc8k	7318	2392	7318	2392	233	15	3.18393	7318	1.79825	NA	NK cells
TCTCATAGTGGCGAAT	pbmc8k	8522	2371	8522	2371	319	13	3.74325	8522	2.0941	Myeloid dendritic cells	Monocytes
CACAAACCATACTCTT	pbmc8k	6337	1938	6337	1938	159	14	2.50907	6337	1.55719	Naive CD8 T cells	CD8+ T cells
TGGTTAGAGATGTGGC	pbmc8k	7708	2057	7708	2057	200	12	2.59471	7708	1.89408	Naive CD4 T cells	CD8+ T cells
CAAGATCGTTGCTCCT	pbmc8k	7872	2307	7872	2307	247	13	3.1377	7872	1.93438	Vd2 gd T cells	T cells
AAGACCTAGCCCAATT	pbmc8k	6711	2025	6711	2025	177	14	2.63746	6711	1.64909	Th1/Th17 cells	CD4+ T cells
GGCGACTGTCCGAAGA	pbmc8k	8136	2329	8136	2329	246	13	3.0236	8136	1.99925	Non-switched memory B cells	B cells
AGGGTGATCCGCAGTG	pbmc8k	7860	2335	7860	2335	357	13	4.54198	7860	1.93143	Classical monocytes	Monocytes
CGCTGGAAGGACAGCT	pbmc8k	6934	2133	6934	2133	257	14	3.70637	6934	1.70389	T regulatory cells	CD4+ T cells
CCTTTCTTCGGTCCGA	pbmc8k	7554	2246	7554	2246	257	14	3.40217	7554	1.85624	Classical monocytes	NA
AAGGCAGGTATATGGA	pbmc8k	7261	2293	7261	2293	311	13	4.28316	7261	1.78424	Non classical monocytes	Monocytes
CATCGAATCACAGGCC	pbmc8k	7364	2151	7364	2151	342	14	4.64422	7364	1.80955	Non classical monocytes	Monocytes
GTGTGCGGTCTCCACT	pbmc8k	7472	2279	7472	2279	232	13	3.10493	7472	1.83609	NA	NA
ATGGGAGCATGGATGG	pbmc8k	7975	2142	7975	2142	256	13	3.21003	7975	1.95969	Central memory CD8 T cells	CD8+ T cells
CAGCCGATCATTATCC	pbmc8k	9221	2709	9221	2709	341	13	3.69808	9221	2.26587	T regulatory cells	CD4+ T cells
AGATTGCCACCCATTC	pbmc8k	6498	1979	6498	1979	175	14	2.69314	6498	1.59675	NA	NA
CTCATTACACGTGAGA	pbmc8k	7323	2277	7323	2277	344	12	4.69753	7323	1.79947	Non classical monocytes	NA
GCTCTGTGTGTGACGA	pbmc8k	7415	2368	7415	2368	239	13	3.2232	7415	1.82208	Plasmacytoid dendritic cells	Dendritic cells
CCGTACTGTCTAAACC	pbmc8k	6095	2175	6095	2175	227	13	3.72436	6095	1.49772	Non classical monocytes	Monocytes
AGCAGCCTCCCACTTG	pbmc8k	7130	2135	7130	2135	224	13	3.14165	7130	1.75205	Classical monocytes	Monocytes
GCATGCGAGGGTCTCC	pbmc8k	7534	2183	7534	2183	378	15	5.01726	7534	1.85132	Non classical monocytes	Monocytes
AGGTCATGTTCCGGCA	pbmc8k	8159	2408	8159	2408	240	14	2.94154	8159	2.0049	NA	NA
ATGTGTGCAGGACGTA	pbmc8k	7320	2245	7320	2245	382	14	5.21858	7320	1.79874	NA	NA
ACGGCCAGTCTGGAGA	pbmc8k	7313	2121	7313	2121	225	13	3.07671	7313	1.79702	MAIT cells	T cells
GTGCGGTCAGTCGATT	pbmc8k	7267	2507	7267	2507	340	13	4.67868	7267	1.78571	NA	NA
AAGACCTTCACTTACT	pbmc8k	5871	2249	5871	2249	111	13	1.89065	5871	1.44268	Non-Vd2 gd T cells	NA
CAGCAGCGTCAGAATA	pbmc8k	8507	2455	8507	2455	362	13	4.25532	8507	2.09042	Myeloid dendritic cells	Monocytes
TCGTAGAAGTGGACGT	pbmc8k	7225	2348	7225	2348	232	13	3.21107	7225	1.77539	Non classical monocytes	Monocytes
GGATTACTCATGCAAC	pbmc8k	6133	2012	6133	2012	238	14	3.88065	6133	1.50706	Th2 cells	CD4+ T cells
ATCACGAAGCTTATCG	pbmc8k	8218	2348	8218	2348	337	15	4.10075	8218	2.0194	Intermediate monocytes	Monocytes
AGCTTGATCACCATAG	pbmc8k	7433	1961	7433	1961	329	14	4.42621	7433	1.8265	Non-switched memory B cells	B cells
CTCATTAAGTTACCCA	pbmc8k	7152	2349	7152	2349	181	12	2.53076	7152	1.75745	T regulatory cells	CD4+ T cells
AGGCCACTCATGTCTT	pbmc8k	6760	2194	6760	2194	269	13	3.97929	6760	1.66113	Non classical monocytes	Monocytes
GGGATGAGTTCACGGC	pbmc8k	6964	2382	6964	2382	182	12	2.61344	6964	1.71126	T regulatory cells	CD4+ T cells
GAATAAGCATTGGGCC	pbmc8k	7595	2265	7595	2265	384	14	5.05596	7595	1.86631	Classical monocytes	NA
GCAGTTAAGAGAGCTC	pbmc8k	7218	2184	7218	2184	187	14	2.59075	7218	1.77367	Vd2 gd T cells	T cells
TCATTACGTCGACTGC	pbmc8k	7200	2301	7200	2301	321	12	4.45833	7200	1.76925	MAIT cells	T cells
TCTTTCCGTTTCGCTC	pbmc8k	6903	2321	6903	2321	134	12	1.94118	6903	1.69627	NA	NK cells
ACTGTCCAGCAGACTG	pbmc8k	7148	2136	7148	2136	331	16	4.63067	7148	1.75647	Non classical monocytes	Monocytes
GCTTGAAGTACCGTTA	pbmc8k	6856	2057	6856	2057	366	13	5.33839	6856	1.68472	NA	NA
TGCTACCGTCTGATCA	pbmc8k	6862	2016	6862	2016	202	12	2.94375	6862	1.68619	Naive CD4 T cells	CD4+ T cells
TGACGGCTCCTCAATT	pbmc8k	7241	2357	7241	2357	259	13	3.57685	7241	1.77932	Non classical monocytes	Monocytes
CGTTGGGCAATGGAAT	pbmc8k	6694	2250	6694	2250	262	12	3.91395	6694	1.64491	Non-switched memory B cells	B cells
TCTGGAAGTCTCATCC	pbmc8k	7381	2186	7381	2186	280	14	3.79352	7381	1.81373	Non classical monocytes	Monocytes
CGTCAGGAGTGGGTTG	pbmc8k	7608	2336	7608	2336	317	15	4.16667	7608	1.86951	Non classical monocytes	Monocytes
TCACAAGGTCGCATCG	pbmc8k	7442	2154	7442	2154	174	13	2.33808	7442	1.82872	Central memory CD8 T cells	CD8+ T cells
GGATTACCAGAGCCAA	pbmc8k	6799	2302	6799	2302	208	13	3.05927	6799	1.67071	Vd2 gd T cells	T cells
GGGTCTGCAGACACTT	pbmc8k	6379	2385	6379	2385	104	13	1.63035	6379	1.56751	Plasmacytoid dendritic cells	Dendritic cells
CCCAATCAGATCACGG	pbmc8k	6604	2057	6604	2057	144	13	2.1805	6604	1.6228	NA	NA
GATGAAACACCCAGTG	pbmc8k	6615	2132	6615	2132	268	13	4.0514	6615	1.6255	Non classical monocytes	Monocytes
GCATACACAAGAGGCT	pbmc8k	6594	2061	6594	2061	237	14	3.59418	6594	1.62034	Central memory CD8 T cells	NA
GCCTCTAGTGCATCTA	pbmc8k	6329	2399	6329	2399	184	14	2.90725	6329	1.55522	Natural killer cells	NK cells
GGCCGATAGGCTAGGT	pbmc8k	7393	2325	7393	2325	167	13	2.25889	7393	1.81668	Natural killer cells	NK cells
AGCTCCTGTTCGGGCT	pbmc8k	7492	2462	7492	2462	99	13	1.32141	7492	1.841	Plasmacytoid dendritic cells	Dendritic cells
GCAGCCAAGTTAAGTG	pbmc8k	7878	2260	7878	2260	321	14	4.07464	7878	1.93585	Intermediate monocytes	Monocytes
ACGCAGCCACAACGTT	pbmc8k	6918	2163	6918	2163	291	13	4.20642	6918	1.69995	Classical monocytes	NA
ACATACGTCTCGCTTG	pbmc8k	7581	2357	7581	2357	359	16	4.73552	7581	1.86287	NA	NA
TCGGGACTCTGTACGA	pbmc8k	8323	2060	8323	2060	177	15	2.12664	8323	2.0452	Naive CD8 T cells	CD8+ T cells
CGATGGCTCTTGACGA	pbmc8k	6874	2324	6874	2324	124	12	1.8039	6874	1.68914	T regulatory cells	CD4+ T cells
CACCTTGAGGCCCTCA	pbmc8k	7144	2227	7144	2227	313	14	4.3813	7144	1.75549	NA	NA
ACGGAGAAGAAACGCC	pbmc8k	7072	2144	7072	2144	219	14	3.09672	7072	1.7378	Th17 cells	CD4+ T cells
GCTGCTTCAAGTCATC	pbmc8k	6684	2349	6684	2349	152	12	2.27409	6684	1.64245	NA	NA
CGACCTTGTACCGGCT	pbmc8k	7022	1941	7022	1941	209	12	2.97636	7022	1.72551	Naive CD8 T cells	NA
GAATAAGCACGTGAGA	pbmc8k	6730	1994	6730	1994	167	12	2.48143	6730	1.65376	NA	NA
AGGTCATCATTCACTT	pbmc8k	6208	1892	6208	1892	238	13	3.83376	6208	1.52549	Non-switched memory B cells	B cells
CTACCCAAGCCAGTAG	pbmc8k	6244	1991	6244	1991	256	14	4.09994	6244	1.53433	Naive B cells	B cells
CAAGATCAGTTGAGTA	pbmc8k	8011	2238	8011	2238	324	14	4.04444	8011	1.96854	Intermediate monocytes	Monocytes
ATGCGATAGATCACGG	pbmc8k	6533	2163	6533	2163	159	12	2.4338	6533	1.60535	NA	NA
TACTCATAGTACGACG	pbmc8k	7373	2214	7373	2214	231	14	3.13305	7373	1.81176	Th2 cells	CD4+ T cells
CATGACATCAGTGCAT	pbmc8k	6973	2114	6973	2114	140	12	2.00774	6973	1.71347	T regulatory cells	CD4+ T cells
GATCAGTCACCACCAG	pbmc8k	7431	2303	7431	2303	311	15	4.18517	7431	1.82601	Myeloid dendritic cells	Dendritic cells
CATCAAGCATGCCACG	pbmc8k	6855	2251	6855	2251	189	15	2.75711	6855	1.68447	Non classical monocytes	Monocytes
CCCTCCTAGAGTCGGT	pbmc8k	7428	2252	7428	2252	181	13	2.43673	7428	1.82528	Naive CD8 T cells	CD8+ T cells
AGCTTGACAACTGCTA	pbmc8k	6454	2126	6454	2126	193	13	2.99039	6454	1.58594	NA	NA
CATTATCCATAACCTG	pbmc8k	6667	2177	6667	2177	362	15	5.42973	6667	1.63828	Non classical monocytes	Monocytes
AGAATAGTCGTGGGAA	pbmc8k	8002	2378	8002	2378	335	14	4.18645	8002	1.96632	Myeloid dendritic cells	Dendritic cells
TCAATCTGTGAAGGCT	pbmc8k	7163	2003	7163	2003	174	12	2.42915	7163	1.76016	Naive CD4 T cells	CD4+ T cells
CAAGATCAGACCACGA	pbmc8k	7153	2002	7153	2002	197	13	2.75409	7153	1.7577	NA	NA
TTCGAAGCAGCATGAG	pbmc8k	8199	2016	8199	2016	179	15	2.18319	8199	2.01473	T regulatory cells	CD4+ T cells
TCAACGACAGTGACAG	pbmc8k	6579	2243	6579	2243	214	12	3.25277	6579	1.61665	Non classical monocytes	Monocytes
CGACCTTCATCCCATC	pbmc8k	7604	2257	7604	2257	315	15	4.14256	7604	1.86852	Non classical monocytes	Monocytes
CTAACTTAGCCCGAAA	pbmc8k	6618	2374	6618	2374	127	13	1.91901	6618	1.62624	Plasmacytoid dendritic cells	Dendritic cells
AACCGCGCATGCAATC	pbmc8k	7405	2332	7405	2332	245	15	3.30858	7405	1.81962	NA	NA
TCTGGAAAGAATCTCC	pbmc8k	7463	2342	7463	2342	80	12	1.07195	7463	1.83388	Th1/Th17 cells	CD4+ T cells
AACCGCGCACTGTGTA	pbmc8k	7670	2192	7670	2192	365	12	4.7588	7670	1.88474	NA	Monocytes
TTGGCAAAGCCGCCTA	pbmc8k	6589	2319	6589	2319	213	13	3.23266	6589	1.61911	Vd2 gd T cells	T cells
CATGCCTTCACCGGGT	pbmc8k	6948	2119	6948	2119	256	16	3.68451	6948	1.70733	NA	NA
TGCCCATGTATATGAG	pbmc8k	7947	2130	7947	2130	379	19	4.7691	7947	1.95281	Classical monocytes	Monocytes
CATCAAGAGTTGCAGG	pbmc8k	7474	2227	7474	2227	358	15	4.78994	7474	1.83658	Intermediate monocytes	Monocytes
TACTCGCAGCTCCCAG	pbmc8k	5886	2105	5886	2105	263	14	4.46823	5886	1.44636	NA	Dendritic cells
TCGGTAACATTGCGGC	pbmc8k	7079	2157	7079	2157	266	12	3.75759	7079	1.73952	NA	NA
CAGAGAGGTAAGTAGT	pbmc8k	6772	2321	6772	2321	106	13	1.56527	6772	1.66408	Plasmacytoid dendritic cells	Dendritic cells
GAACATCGTTAGGGTG	pbmc8k	7057	2003	7057	2003	258	13	3.65594	7057	1.73411	Central memory CD8 T cells	T cells
ATCATGGAGTTAACGA	pbmc8k	7682	2347	7682	2347	196	13	2.55142	7682	1.88769	Classical monocytes	Monocytes
AGTGTCACAAGTTAAG	pbmc8k	6690	2210	6690	2210	241	13	3.60239	6690	1.64393	Non classical monocytes	Monocytes
TATGCCCAGTATGACA	pbmc8k	5951	2058	5951	2058	161	14	2.70543	5951	1.46233	Naive B cells	B cells
GGACATTTCGAATGCT	pbmc8k	6319	2165	6319	2165	283	15	4.47856	6319	1.55276	Non classical monocytes	Monocytes
GCTTGAACACCGCTAG	pbmc8k	7516	2134	7516	2134	305	14	4.05801	7516	1.8469	NA	NA
ATGTGTGGTCAAACTC	pbmc8k	7529	2274	7529	2274	294	13	3.9049	7529	1.85009	Non classical monocytes	Monocytes
TGGGCGTGTTATTCTC	pbmc8k	7291	2254	7291	2254	338	13	4.63585	7291	1.79161	NA	NA
CTGTGCTAGATCGATA	pbmc8k	7161	2307	7161	2307	273	13	3.81232	7161	1.75967	Non classical monocytes	Monocytes
TAGGCATTCACTCCTG	pbmc8k	6586	2231	6586	2231	316	14	4.79806	6586	1.61837	Intermediate monocytes	Monocytes
ATCTGCCAGGTAGCTG	pbmc8k	6669	2295	6669	2295	182	15	2.72904	6669	1.63877	Plasmacytoid dendritic cells	Dendritic cells
AGCAGCCGTTTGGCGC	pbmc8k	6459	2191	6459	2191	168	13	2.60102	6459	1.58716	NA	NA
CCTACACTCGAATCCA	pbmc8k	7840	2371	7840	2371	392	16	5	7840	1.92652	Myeloid dendritic cells	Dendritic cells
CCTTCGAGTTCCCGAG	pbmc8k	7627	2141	7627	2141	358	15	4.69385	7627	1.87418	Myeloid dendritic cells	Monocytes
CCTTACGTCAATCTCT	pbmc8k	6027	2523	6027	2523	168	15	2.78746	6027	1.48101	Natural killer cells	NA
GGCGACTTCTTTACGT	pbmc8k	6409	2193	6409	2193	176	13	2.74614	6409	1.57488	Non classical monocytes	Monocytes
GGGTCTGGTGATAAAC	pbmc8k	6350	2008	6350	2008	154	14	2.4252	6350	1.56038	NA	NA
CATCGGGTCACATGCA	pbmc8k	6315	2323	6315	2323	221	13	3.4996	6315	1.55178	NA	NA
CACACCTCATAAAGGT	pbmc8k	7397	2199	7397	2199	218	14	2.94714	7397	1.81766	Classical monocytes	Monocytes
GATTCAGCACAGGCCT	pbmc8k	6616	1999	6616	1999	148	13	2.237	6616	1.62574	NA	NA
AGACGTTCAGGATCGA	pbmc8k	7146	1788	7146	1788	179	13	2.5049	7146	1.75598	Naive CD8 T cells	CD8+ T cells
TCGGGACAGCTAACTC	pbmc8k	6655	2249	6655	2249	209	13	3.1405	6655	1.63533	MAIT cells	T cells
CTAACTTAGCTTATCG	pbmc8k	6512	2118	6512	2118	244	12	3.74693	6512	1.60019	Non classical monocytes	Monocytes
CACATTTGTCACACGC	pbmc8k	7913	2284	7913	2284	293	13	3.70277	7913	1.94445	Myeloid dendritic cells	Monocytes
GTGTTAGCAAATCCGT	pbmc8k	7267	2169	7267	2169	302	13	4.15577	7267	1.78571	NA	Monocytes
GTTACAGCAGGATTGG	pbmc8k	7869	2200	7869	2200	325	16	4.13013	7869	1.93364	NA	NA
TCAACGATCTGGAGCC	pbmc8k	7720	2305	7720	2305	427	15	5.53109	7720	1.89703	Intermediate monocytes	Monocytes
CAAGAAACACATGTGT	pbmc8k	5885	1946	5885	1946	223	12	3.78929	5885	1.44612	NA	NA
TTCTACACAGTAAGAT	pbmc8k	7271	2175	7271	2175	360	13	4.95118	7271	1.7867	Classical monocytes	Monocytes
CTGAAACTCCCTTGCA	pbmc8k	6050	1978	6050	1978	157	12	2.59504	6050	1.48666	NA	NA
ATTCTACCAGCCTTGG	pbmc8k	6945	2072	6945	2072	349	17	5.0252	6945	1.70659	Classical monocytes	Monocytes
AGTGAGGCACGCTTTC	pbmc8k	6814	2215	6814	2215	168	13	2.46551	6814	1.6744	Plasmacytoid dendritic cells	Dendritic cells
GAATGAATCCAAGCCG	pbmc8k	5923	1969	5923	1969	194	14	3.27537	5923	1.45545	Naive CD4 T cells	CD4+ T cells
AACTCTTGTCATATGC	pbmc8k	5971	1874	5971	1874	157	13	2.62938	5971	1.46725	NA	NA
AAGTCTGCATGAAGTA	pbmc8k	6260	2217	6260	2217	168	13	2.68371	6260	1.53826	NA	NA
TACCTATGTGCAGACA	pbmc8k	7278	2277	7278	2277	334	14	4.58917	7278	1.78842	Myeloid dendritic cells	Dendritic cells
CTCGTACGTTAAGTAG	pbmc8k	5988	2035	5988	2035	317	14	5.29392	5988	1.47143	Naive B cells	B cells
ACATGGTGTTGCGTTA	pbmc8k	6654	2102	6654	2102	197	14	2.96063	6654	1.63508	Central memory CD8 T cells	CD8+ T cells
GCACATATCAACGGCC	pbmc8k	6489	2287	6489	2287	143	12	2.20373	6489	1.59454	Non-Vd2 gd T cells	T cells
CAAGTTGGTCGCATAT	pbmc8k	6532	2143	6532	2143	226	13	3.45989	6532	1.6051	Non classical monocytes	Monocytes
TACCTATGTATCAGTC	pbmc8k	5454	2002	5454	2002	252	14	4.62046	5454	1.34021	Non classical monocytes	Monocytes
ACATACGGTAAGTGGC	pbmc8k	6150	2088	6150	2088	201	14	3.26829	6150	1.51123	NA	NA
CAGAATCTCCACTGGG	pbmc8k	6222	2190	6222	2190	107	13	1.7197	6222	1.52893	Terminal effector CD8 T cells	T cells
TGGTTCCAGTAGCCGA	pbmc8k	7867	2364	7867	2364	222	13	2.82191	7867	1.93315	NA	NA
AATCCAGCAGAGCCAA	pbmc8k	7412	2124	7412	2124	213	13	2.87372	7412	1.82134	Progenitor cells	Progenitors
ACGGAGAAGCAGGCTA	pbmc8k	7247	2190	7247	2190	215	15	2.96674	7247	1.7808	Intermediate monocytes	Monocytes
TGACAACAGGGATGGG	pbmc8k	7232	2407	7232	2407	114	13	1.57633	7232	1.77711	Plasmacytoid dendritic cells	Dendritic cells
CAACCTCTCTGCGTAA	pbmc8k	6844	1944	6844	1944	222	13	3.24372	6844	1.68177	NA	NA
ACTATCTGTACTCAAC	pbmc8k	6115	1987	6115	1987	245	13	4.00654	6115	1.50263	NA	NA
ACGCCAGGTAGGGTAC	pbmc8k	7570	2249	7570	2249	203	13	2.68164	7570	1.86017	NA	NA
GAGGTGAAGTACGTAA	pbmc8k	6329	2153	6329	2153	221	13	3.49186	6329	1.55522	Non classical monocytes	Monocytes
CTAATGGGTCCGTTAA	pbmc8k	6083	2248	6083	2248	221	12	3.63308	6083	1.49477	Natural killer cells	NK cells
TTTACTGAGTGGGATC	pbmc8k	6730	2157	6730	2157	200	14	2.97177	6730	1.65376	Vd2 gd T cells	T cells
ACTGAACCACTATCTT	pbmc8k	6448	1788	6448	1788	201	13	3.11725	6448	1.58446	Central memory CD8 T cells	CD8+ T cells
TTGCGTCTCAAACCGT	pbmc8k	6845	2165	6845	2165	231	13	3.37473	6845	1.68202	Non classical monocytes	Monocytes
CCGTTCAAGGTAGCTG	pbmc8k	6190	2336	6190	2336	160	13	2.58481	6190	1.52106	Plasmacytoid dendritic cells	Dendritic cells
GATCTAGGTGTAACGG	pbmc8k	5920	2119	5920	2119	287	14	4.84797	5920	1.45472	Non classical monocytes	Monocytes
CTAGCCTGTCATATGC	pbmc8k	6339	2248	6339	2248	140	14	2.20855	6339	1.55768	Plasmacytoid dendritic cells	Dendritic cells
TGAGAGGGTGCACCAC	pbmc8k	6876	2125	6876	2125	249	13	3.62129	6876	1.68963	Th1/Th17 cells	CD4+ T cells
AACTCTTTCTCATTCA	pbmc8k	6072	2317	6072	2317	123	12	2.02569	6072	1.49207	Plasmacytoid dendritic cells	Dendritic cells
TTTCCTCAGCGTTGCC	pbmc8k	6595	2145	6595	2145	167	13	2.53222	6595	1.62058	NA	NA
CATGACATCTGTCTCG	pbmc8k	6390	1849	6390	1849	206	15	3.22379	6390	1.57021	NA	NA
CGTGTAACATGGTAGG	pbmc8k	11165	2667	11165	2667	393	13	3.51993	11165	2.74357	Myeloid dendritic cells	Dendritic cells
TGCGCAGAGCGCCTTG	pbmc8k	6852	2200	6852	2200	283	14	4.13018	6852	1.68374	Non classical monocytes	Monocytes
ATGCGATTCAGCATGT	pbmc8k	7265	2095	7265	2095	306	14	4.21198	7265	1.78522	Intermediate monocytes	Monocytes
TAGTTGGCATCTCGCT	pbmc8k	6725	2317	6725	2317	133	13	1.9777	6725	1.65253	Plasmacytoid dendritic cells	Dendritic cells
AAGTCTGGTGCACTTA	pbmc8k	6662	1999	6662	1999	252	14	3.78265	6662	1.63705	NA	NA
GAATGAACAGTTCCCT	pbmc8k	6846	2133	6846	2133	239	12	3.49109	6846	1.68226	Classical monocytes	Monocytes
AGTGAGGCAGTATCTG	pbmc8k	6923	2013	6923	2013	287	13	4.1456	6923	1.70118	Intermediate monocytes	Monocytes
TCACAAGGTGACTCAT	pbmc8k	6300	2163	6300	2163	240	12	3.80952	6300	1.54809	Non classical monocytes	Monocytes
GCTTGAACAATAGAGT	pbmc8k	7123	2116	7123	2116	318	14	4.46441	7123	1.75033	Classical monocytes	Monocytes
CGAACATGTCTTGATG	pbmc8k	7325	2232	7325	2232	330	13	4.50512	7325	1.79997	Intermediate monocytes	Monocytes
GGTATTGAGACCGGAT	pbmc8k	7700	2252	7700	2252	385	17	5	7700	1.89211	Myeloid dendritic cells	Dendritic cells
GTTCTCGGTGCAACTT	pbmc8k	7497	2345	7497	2345	273	13	3.64146	7497	1.84223	Classical monocytes	Dendritic cells
CAACCTCGTCTTGATG	pbmc8k	5833	1838	5833	1838	251	13	4.3031	5833	1.43334	Naive CD8 T cells	CD8+ T cells
GACCTGGAGACTCGGA	pbmc8k	7146	2168	7146	2168	271	13	3.79233	7146	1.75598	Classical monocytes	NA
CAGCAGCGTATAAACG	pbmc8k	7547	2217	7547	2217	363	14	4.80986	7547	1.85452	Classical monocytes	Monocytes
ACTGATGAGGAGTCTG	pbmc8k	5565	1908	5565	1908	195	14	3.50404	5565	1.36748	NA	NA
ACCGTAAAGGAGCGTT	pbmc8k	7281	2273	7281	2273	289	15	3.96923	7281	1.78915	Non classical monocytes	Monocytes
TAGCCGGTCTGTACGA	pbmc8k	7452	1894	7452	1894	336	14	4.50886	7452	1.83117	Non-switched memory B cells	B cells
GACCTGGTCGGTTCGG	pbmc8k	6993	2084	6993	2084	187	13	2.6741	6993	1.71838	MAIT cells	T cells
AGCATACGTGAGTGAC	pbmc8k	6408	2271	6408	2271	157	14	2.45006	6408	1.57463	Plasmacytoid dendritic cells	Dendritic cells
ATCATGGTCCACGAAT	pbmc8k	6781	2097	6781	2097	300	14	4.42413	6781	1.66629	Intermediate monocytes	Monocytes
AGGCCACGTCATCCCT	pbmc8k	7764	2060	7764	2060	157	14	2.02215	7764	1.90784	Th17 cells	CD4+ T cells
CACACCTTCCCGGATG	pbmc8k	7486	2197	7486	2197	305	14	4.07427	7486	1.83953	Classical monocytes	Monocytes
GTGTTAGTCAAACCAC	pbmc8k	6161	2028	6161	2028	184	14	2.98653	6161	1.51394	Vd2 gd T cells	T cells
CACCTTGGTAAGAGGA	pbmc8k	7403	1950	7403	1950	172	13	2.32338	7403	1.81913	Th1/Th17 cells	CD4+ T cells
TGACTAGAGCCACGTC	pbmc8k	6573	2183	6573	2183	208	14	3.16446	6573	1.61518	Non classical monocytes	Monocytes
GGCGACTCAGAGCCAA	pbmc8k	6401	2026	6401	2026	308	13	4.81175	6401	1.57291	NA	T cells
ACTGTCCAGCGCTTAT	pbmc8k	6535	1869	6535	1869	199	12	3.04514	6535	1.60584	Naive CD8 T cells	CD8+ T cells
GGTGAAGTCACCCTCA	pbmc8k	7125	2228	7125	2228	324	13	4.54737	7125	1.75082	Classical monocytes	Monocytes
AAAGTAGGTACACCGC	pbmc8k	6390	2004	6390	2004	153	14	2.39437	6390	1.57021	Vd2 gd T cells	T cells
GCTCTGTCAAGAGTCG	pbmc8k	6633	2095	6633	2095	313	14	4.71883	6633	1.62992	Classical monocytes	NA
TTCGAAGGTCGGGTCT	pbmc8k	7197	2241	7197	2241	98	13	1.36168	7197	1.76851	Plasmacytoid dendritic cells	Dendritic cells
CGCGGTAAGCAAATCA	pbmc8k	6810	2433	6810	2433	87	13	1.27753	6810	1.67342	Plasmacytoid dendritic cells	Dendritic cells
TACGGATCACGGCCAT	pbmc8k	5747	2271	5747	2271	153	13	2.66226	5747	1.41221	Natural killer cells	NK cells
TATTACCCAATAGCGG	pbmc8k	6239	2216	6239	2216	84	13	1.34637	6239	1.5331	Plasmacytoid dendritic cells	Dendritic cells
GTAGTCAGTACGACCC	pbmc8k	6137	1811	6137	1811	162	14	2.63973	6137	1.50804	NA	NA
GCGAGAACACCTCGGA	pbmc8k	6031	1979	6031	1979	237	13	3.9297	6031	1.48199	NA	NA
CCTAGCTCACCTCGTT	pbmc8k	5647	2295	5647	2295	252	16	4.46255	5647	1.38763	NA	NA
AGGCCGTAGACAAAGG	pbmc8k	6576	1855	6576	1855	242	14	3.68005	6576	1.61591	NA	NA
CTCTACGTCGTCGTTC	pbmc8k	7116	2193	7116	2193	171	12	2.40304	7116	1.74861	Plasmacytoid dendritic cells	Dendritic cells
CAACCTCCAGTAACGG	pbmc8k	5436	1920	5436	1920	169	12	3.1089	5436	1.33578	Naive B cells	B cells
TTCGAAGTCTGGTTCC	pbmc8k	6999	2298	6999	2298	129	14	1.84312	6999	1.71986	Plasmacytoid dendritic cells	Dendritic cells
ATCCGAAGTCTGCCAG	pbmc8k	5786	2038	5786	2038	189	13	3.26651	5786	1.42179	Non-Vd2 gd T cells	T cells
TGGACGCGTGAAAGAG	pbmc8k	7219	1919	7219	1919	168	13	2.32719	7219	1.77392	Naive CD4 T cells	CD8+ T cells
TCATTTGCACTGTCGG	pbmc8k	5459	1870	5459	1870	192	13	3.51713	5459	1.34144	Natural killer cells	NA
AACTCCCCATGCCTAA	pbmc8k	7647	2219	7647	2219	221	16	2.89002	7647	1.87909	Myeloid dendritic cells	Monocytes
AAGTCTGAGTTGCAGG	pbmc8k	6275	1862	6275	1862	162	14	2.58167	6275	1.54195	Central memory CD8 T cells	T cells
GGACGTCGTGAGCGAT	pbmc8k	7665	2157	7665	2157	245	13	3.19635	7665	1.88351	Vd2 gd T cells	T cells
TGCGGGTCACGGATAG	pbmc8k	7021	2157	7021	2157	175	13	2.49252	7021	1.72526	NA	NA
CCTTACGGTCAATACC	pbmc8k	5899	1901	5899	1901	197	13	3.33955	5899	1.44956	NA	NA
TACTCGCAGAATTCCC	pbmc8k	7263	2063	7263	2063	124	13	1.70728	7263	1.78473	Th2 cells	CD4+ T cells
GGCTGGTCAGTTCCCT	pbmc8k	6619	2188	6619	2188	211	13	3.18779	6619	1.62648	Non classical monocytes	Monocytes
AGCGGTCTCCGAGCCA	pbmc8k	7649	1890	7649	1890	181	13	2.36632	7649	1.87958	Th2 cells	CD4+ T cells
AACCGCGCAGATCGGA	pbmc8k	8345	2260	8345	2260	305	14	3.65488	8345	2.05061	Intermediate monocytes	Monocytes
CTTGGCTGTTAAGTAG	pbmc8k	7397	1941	7397	1941	199	13	2.69028	7397	1.81766	Th1/Th17 cells	CD4+ T cells
GCATGTATCATAACCG	pbmc8k	7447	2217	7447	2217	231	14	3.10192	7447	1.82994	Classical monocytes	Monocytes
CAAGATCGTTAGGGTG	pbmc8k	6450	2058	6450	2058	284	14	4.4031	6450	1.58495	Non-switched memory B cells	B cells
GTGGGTCAGCTAGTCT	pbmc8k	6374	2146	6374	2146	89	14	1.3963	6374	1.56628	Plasmacytoid dendritic cells	Dendritic cells
CATATGGAGTGTTAGA	pbmc8k	6484	2245	6484	2245	140	14	2.15916	6484	1.59331	Plasmacytoid dendritic cells	Dendritic cells
CCTCTGATCTACCAGA	pbmc8k	6768	2040	6768	2040	298	13	4.40307	6768	1.66309	Intermediate monocytes	Monocytes
CCTACACAGAATTCCC	pbmc8k	6870	1738	6870	1738	234	14	3.40611	6870	1.68816	Non-switched memory B cells	B cells
GGTGCGTCACTCGACG	pbmc8k	6562	2150	6562	2150	179	13	2.72783	6562	1.61247	Non-switched memory B cells	B cells
CCCTCCTGTACCCAAT	pbmc8k	6752	2071	6752	2071	255	14	3.77666	6752	1.65916	NA	NA
CCTTTCTAGTGTGAAT	pbmc8k	6823	2150	6823	2150	317	13	4.64605	6823	1.67661	Myeloid dendritic cells	Dendritic cells
CTGAAACCACATTAGC	pbmc8k	6790	1936	6790	1936	146	12	2.15022	6790	1.6685	Th17 cells	CD4+ T cells
TTGTAGGTCTACCAGA	pbmc8k	5616	2093	5616	2093	182	14	3.24074	5616	1.38001	Vd2 gd T cells	T cells
AGCGTATCACAAGACG	pbmc8k	6034	2099	6034	2099	243	15	4.02718	6034	1.48273	Non classical monocytes	Monocytes
AGTCTTTCATCTACGA	pbmc8k	6453	2142	6453	2142	342	14	5.29986	6453	1.58569	Classical monocytes	Monocytes
ACGGGCTCAGTCAGAG	pbmc8k	6343	2171	6343	2171	213	12	3.35803	6343	1.55866	NA	NK cells
GATGAAACAGACGCTC	pbmc8k	6098	2112	6098	2112	164	13	2.68941	6098	1.49846	NA	NK cells
AGCAGCCAGTGTGAAT	pbmc8k	6493	2047	6493	2047	343	14	5.28261	6493	1.59552	Classical monocytes	Monocytes
ACGGAGAGTGGCTCCA	pbmc8k	6369	2062	6369	2062	133	12	2.08824	6369	1.56505	NA	NA
ACATGGTAGTGGTAAT	pbmc8k	7501	1855	7501	1855	171	14	2.2797	7501	1.84321	Th17 cells	CD4+ T cells
ACATGGTTCTACCTGC	pbmc8k	5604	1937	5604	1937	199	12	3.55103	5604	1.37707	NA	NA
AGCTTGATCGATCCCT	pbmc8k	7390	2005	7390	2005	235	13	3.17997	7390	1.81594	NA	NA
TCAGGATAGGATGTAT	pbmc8k	5641	1888	5641	1888	242	14	4.29002	5641	1.38616	Vd2 gd T cells	NA
AACCATGAGGTAGCTG	pbmc8k	6985	2005	6985	2005	315	13	4.50966	6985	1.71642	Exhausted B cells	B cells
CTGTTTAGTGATGATA	pbmc8k	6263	1985	6263	1985	206	14	3.28916	6263	1.539	Classical monocytes	Monocytes
AGTGTCAAGACGACGT	pbmc8k	6433	2313	6433	2313	165	14	2.5649	6433	1.58078	Plasmacytoid dendritic cells	Dendritic cells
CAACTAGCAAGTCATC	pbmc8k	6684	1854	6684	1854	177	15	2.64811	6684	1.64245	Th1/Th17 cells	CD4+ T cells
TTAACTCCATTTCAGG	pbmc8k	6242	2328	6242	2328	121	15	1.93848	6242	1.53384	Plasmacytoid dendritic cells	Dendritic cells
AGGTCATCAACACCTA	pbmc8k	6852	1873	6852	1873	169	14	2.46643	6852	1.68374	Naive CD4 T cells	CD4+ T cells
TGTCCCAGTAAGTGTA	pbmc8k	7229	2268	7229	2268	253	13	3.49979	7229	1.77638	Classical monocytes	Monocytes
TTTGGTTAGGTTACCT	pbmc8k	7104	2266	7104	2266	331	14	4.65935	7104	1.74566	NA	NA
GTAGGCCGTATAGGGC	pbmc8k	6626	1867	6626	1867	184	14	2.77694	6626	1.6282	NA	NA
TACCTATGTTCAGCGC	pbmc8k	7351	2172	7351	2172	286	14	3.89063	7351	1.80635	Classical monocytes	Monocytes
GAACGGATCTAACTCT	pbmc8k	7552	2307	7552	2307	379	15	5.01854	7552	1.85575	Classical monocytes	Monocytes
CCTAGCTAGTGTACGG	pbmc8k	7338	2229	7338	2229	357	15	4.86509	7338	1.80316	NA	NA
CGGGTCAAGTATCGAA	pbmc8k	5696	1878	5696	1878	187	13	3.28301	5696	1.39967	NA	NA
CATCAAGTCTCCAACC	pbmc8k	6438	2101	6438	2101	228	13	3.54147	6438	1.582	Non classical monocytes	Monocytes
CTAAGACGTCGAGATG	pbmc8k	6398	2171	6398	2171	241	12	3.7668	6398	1.57218	Vd2 gd T cells	NA
TCTTTCCAGAGCCTAG	pbmc8k	7396	2192	7396	2192	312	15	4.2185	7396	1.81741	Intermediate monocytes	Monocytes
TCTCATATCTTGACGA	pbmc8k	5887	2213	5887	2213	134	13	2.2762	5887	1.44661	Plasmacytoid dendritic cells	Dendritic cells
ACGATGTCAGACACTT	pbmc8k	4301	2124	4301	2124	126	14	2.92955	4301	1.05688	NA	NK cells
GACCAATCAGGGTACA	pbmc8k	6928	2063	6928	2063	268	13	3.86836	6928	1.70241	Intermediate monocytes	Monocytes
TGCCCATGTCCATCCT	pbmc8k	7160	2216	7160	2216	323	15	4.51117	7160	1.75942	NA	NA
CTAATGGCAATGAAAC	pbmc8k	6738	1911	6738	1911	296	13	4.39299	6738	1.65572	Non-switched memory B cells	B cells
CGTCCATTCCAACCAA	pbmc8k	6762	2115	6762	2115	243	14	3.59361	6762	1.66162	Classical monocytes	Monocytes
CCGGTAGTCGTCTGAA	pbmc8k	6023	2078	6023	2078	187	13	3.10477	6023	1.48003	NA	NA
GTCGTAACAACTTGAC	pbmc8k	7138	1878	7138	1878	167	14	2.33959	7138	1.75401	Naive CD4 T cells	CD4+ T cells
AGGCCACGTATAAACG	pbmc8k	5977	1934	5977	1934	169	12	2.82751	5977	1.46872	Naive B cells	B cells
ATTACTCCATTACGAC	pbmc8k	5963	1938	5963	1938	153	13	2.56582	5963	1.46528	NA	NA
CGTCAGGGTCTCTTTA	pbmc8k	5840	2194	5840	2194	204	15	3.49315	5840	1.43506	NA	NK cells
AGTCTTTGTTCAGCGC	pbmc8k	6323	1920	6323	1920	152	12	2.40392	6323	1.55375	Naive CD4 T cells	CD4+ T cells
GCTCTGTGTACCAGTT	pbmc8k	6693	2231	6693	2231	225	13	3.36172	6693	1.64467	Non classical monocytes	Monocytes
AGATTGCCATCGACGC	pbmc8k	7154	2203	7154	2203	308	14	4.30528	7154	1.75795	Non classical monocytes	Monocytes
CGTTAGAAGATAGGAG	pbmc8k	7075	1821	7075	1821	131	13	1.85159	7075	1.73853	Th17 cells	CD4+ T cells
GCTCCTACAGCGTAAG	pbmc8k	7289	2222	7289	2222	285	14	3.91	7289	1.79112	NA	NA
AGGTCATCACCGAAAG	pbmc8k	6875	2038	6875	2038	205	12	2.98182	6875	1.68939	Intermediate monocytes	Monocytes
ATCATGGCACATGTGT	pbmc8k	6913	2166	6913	2166	293	15	4.23839	6913	1.69873	Classical monocytes	Monocytes
TGCGCAGCACGTTGGC	pbmc8k	7010	2077	7010	2077	413	15	5.89158	7010	1.72256	Intermediate monocytes	Monocytes
GTGCAGCAGCTGCAAG	pbmc8k	6932	2171	6932	2171	266	13	3.83728	6932	1.70339	Classical monocytes	Monocytes
TGCCCTAAGATGTAAC	pbmc8k	6025	2053	6025	2053	307	15	5.09544	6025	1.48052	NA	Monocytes
GAGTCCGAGCGCTTAT	pbmc8k	6194	2071	6194	2071	214	13	3.45496	6194	1.52205	Th1/Th17 cells	CD4+ T cells
CTTGGCTAGGTTCCTA	pbmc8k	6040	1955	6040	1955	194	14	3.21192	6040	1.4842	Central memory CD8 T cells	CD8+ T cells
TTGGCAAGTGAACCTT	pbmc8k	6340	1899	6340	1899	134	14	2.11356	6340	1.55792	Th2 cells	CD4+ T cells
CCCATACGTCCGTCAG	pbmc8k	7406	2083	7406	2083	266	15	3.59168	7406	1.81987	NA	NA
CGTGTAACAACTGCTA	pbmc8k	11026	2866	11026	2866	472	14	4.28079	11026	2.70941	Myeloid dendritic cells	Dendritic cells
CGAACATTCTTACCTA	pbmc8k	6192	1893	6192	1893	219	14	3.53682	6192	1.52155	Non-switched memory B cells	B cells
GACTAACGTCTAAAGA	pbmc8k	6150	1686	6150	1686	204	13	3.31707	6150	1.51123	Non-switched memory B cells	B cells
GACTAACAGGGCATGT	pbmc8k	6212	1989	6212	1989	289	16	4.65229	6212	1.52647	Intermediate monocytes	Monocytes
AACTTTCGTAGAGCTG	pbmc8k	7207	2309	7207	2309	322	13	4.46788	7207	1.77097	T regulatory cells	NA
TCTCTAACATCGGAAG	pbmc8k	6757	2267	6757	2267	254	13	3.75906	6757	1.66039	Non classical monocytes	Monocytes
TAAGTGCCACGGTAAG	pbmc8k	6977	2102	6977	2102	394	14	5.64713	6977	1.71445	Classical monocytes	Monocytes
CTCAGAACAAATACAG	pbmc8k	4627	1866	4627	1866	114	12	2.4638	4627	1.13699	NA	NA
ACTGTCCTCATCGCTC	pbmc8k	7364	2353	7364	2353	272	15	3.69364	7364	1.80955	Classical monocytes	Monocytes
TGACGGCGTTCAGTAC	pbmc8k	7441	2303	7441	2303	213	13	2.86252	7441	1.82847	T regulatory cells	CD4+ T cells
TACAGTGTCATATCGG	pbmc8k	5973	1915	5973	1915	211	12	3.53256	5973	1.46774	NA	NA
TGACGGCCATAAGACA	pbmc8k	6943	1988	6943	1988	402	14	5.79	6943	1.7061	NA	NA
ACATACGTCTTGAGGT	pbmc8k	5213	1951	5213	1951	229	13	4.39286	5213	1.28099	Non classical monocytes	Monocytes
TGCCCATAGGGATACC	pbmc8k	6069	1793	6069	1793	143	13	2.35624	6069	1.49133	NA	NA
AGAGCGATCAGGCCCA	pbmc8k	6939	2167	6939	2167	248	12	3.574	6939	1.70511	Non classical monocytes	Monocytes
CTAATGGCAGATTGCT	pbmc8k	5870	1937	5870	1937	301	14	5.12777	5870	1.44243	Non classical monocytes	Monocytes
AAGCCGCCAAAGCAAT	pbmc8k	6766	2017	6766	2017	331	15	4.89211	6766	1.6626	Classical monocytes	Monocytes
TGCCAAATCCAACCAA	pbmc8k	6574	2199	6574	2199	286	15	4.35047	6574	1.61542	Non classical monocytes	Monocytes
TCATTTGCACGCTTTC	pbmc8k	7082	1675	7082	1675	452	15	6.38238	7082	1.74025	Non-switched memory B cells	B cells
CTTCTCTCAGATGGCA	pbmc8k	6051	1880	6051	1880	203	13	3.35482	6051	1.48691	Exhausted B cells	B cells
GCTGCAGCACGGATAG	pbmc8k	7188	1920	7188	1920	194	14	2.69894	7188	1.7663	Naive CD4 T cells	CD4+ T cells
TTAGGACCAGGGCATA	pbmc8k	5751	1995	5751	1995	65	12	1.13024	5751	1.41319	Plasmacytoid dendritic cells	Dendritic cells
AGCGTATAGAAACGAG	pbmc8k	5246	1891	5246	1891	278	13	5.29928	5246	1.2891	Non classical monocytes	Monocytes
GCATGTATCCACTGGG	pbmc8k	6869	2074	6869	2074	130	12	1.89256	6869	1.68791	Th1/Th17 cells	CD4+ T cells
TAGACCAGTAAGCACG	pbmc8k	5838	2218	5838	2218	96	15	1.6444	5838	1.43457	Plasmacytoid dendritic cells	Dendritic cells
CGGAGTCGTGTGTGCC	pbmc8k	7543	2224	7543	2224	315	14	4.17606	7543	1.85353	NA	NA
TGAAAGACATCAGTAC	pbmc8k	6400	1926	6400	1926	106	12	1.65625	6400	1.57267	Th2 cells	CD4+ T cells
TGGCGCACACCCTATC	pbmc8k	5729	2099	5729	2099	216	14	3.77029	5729	1.40778	Vd2 gd T cells	T cells
AAGGCAGAGGTGCACA	pbmc8k	6179	1931	6179	1931	133	14	2.15245	6179	1.51836	Follicular helper T cells	CD4+ T cells
GTTTCTATCTCAAACG	pbmc8k	6289	1953	6289	1953	283	14	4.49992	6289	1.54539	Classical monocytes	Monocytes
GTATTCTCACGGCGTT	pbmc8k	7286	2044	7286	2044	138	12	1.89404	7286	1.79038	Th1/Th17 cells	CD4+ T cells
CAGCTGGGTATTCTCT	pbmc8k	6077	1988	6077	1988	185	12	3.04427	6077	1.4933	Non classical monocytes	Monocytes
GCCTCTATCCCTGACT	pbmc8k	6457	1755	6457	1755	263	13	4.0731	6457	1.58667	Non-switched memory B cells	B cells
TTAGTTCGTACATGTC	pbmc8k	6188	2074	6188	2074	247	15	3.9916	6188	1.52057	Non classical monocytes	Monocytes
GAAGCAGGTAGAGTGC	pbmc8k	6714	2374	6714	2374	131	13	1.95115	6714	1.64983	NA	Dendritic cells
ATGAGGGAGACCCACC	pbmc8k	6631	2187	6631	2187	325	18	4.90122	6631	1.62943	NA	NA
GTGCGGTCACACGCTG	pbmc8k	5894	1894	5894	1894	185	12	3.13879	5894	1.44833	Th17 cells	CD4+ T cells
AAGGAGCGTCTTCAAG	pbmc8k	7385	2635	7385	2635	158	13	2.13947	7385	1.81471	NA	NA
GTGCAGCCAAACCTAC	pbmc8k	6036	2042	6036	2042	198	12	3.28032	6036	1.48322	Non classical monocytes	Monocytes
ACGATACAGGCGCTCT	pbmc8k	5826	1982	5826	1982	316	12	5.42396	5826	1.43162	Non classical monocytes	Monocytes
TGAGCCGTCTAGCACA	pbmc8k	6452	2037	6452	2037	173	13	2.68134	6452	1.58544	Follicular helper T cells	CD4+ T cells
CTACGTCGTTTGGGCC	pbmc8k	6329	2016	6329	2016	175	15	2.76505	6329	1.55522	Vd2 gd T cells	T cells
GGCTCGACAGTCGATT	pbmc8k	6155	2002	6155	2002	204	12	3.31438	6155	1.51246	NA	NA
TGCCAAACAAGCCGTC	pbmc8k	5772	2044	5772	2044	211	14	3.65558	5772	1.41835	Non classical monocytes	Monocytes
GGCGTGTCATCCGTGG	pbmc8k	7072	2253	7072	2253	113	13	1.59785	7072	1.7378	Plasmacytoid dendritic cells	Dendritic cells
TACACGAGTAAGAGGA	pbmc8k	6647	1952	6647	1952	394	14	5.92749	6647	1.63336	Classical monocytes	Monocytes
ATCGAGTGTCTTCAAG	pbmc8k	6147	2020	6147	2020	365	16	5.93786	6147	1.5105	Classical monocytes	Monocytes
TCTGAGACAGAGTGTG	pbmc8k	6214	1922	6214	1922	101	11	1.62536	6214	1.52696	Naive CD4 T cells	CD4+ T cells
ACACTGAGTCACTTCC	pbmc8k	6121	2061	6121	2061	342	14	5.58732	6121	1.50411	NA	NA
CGTTGGGGTGAGGGTT	pbmc8k	6353	2117	6353	2117	208	13	3.27404	6353	1.56112	Non classical monocytes	Monocytes
GTCTTCGGTAGAGCTG	pbmc8k	6370	1978	6370	1978	207	14	3.24961	6370	1.56529	Naive B cells	B cells
TCGTAGAAGGACATTA	pbmc8k	6548	2077	6548	2077	299	14	4.56628	6548	1.60903	Non classical monocytes	Monocytes
GTTTCTAAGGATATAC	pbmc8k	5557	1989	5557	1989	221	12	3.97697	5557	1.36552	Vd2 gd T cells	T cells
AGAGTGGCAAGCCCAC	pbmc8k	5861	2158	5861	2158	156	15	2.66166	5861	1.44022	Plasmacytoid dendritic cells	Dendritic cells
GCTTGAAGTAGCTTGT	pbmc8k	6380	2230	6380	2230	232	13	3.63636	6380	1.56775	Vd2 gd T cells	T cells
TACTCGCTCGTTACAG	pbmc8k	6364	2128	6364	2128	351	14	5.5154	6364	1.56382	Non classical monocytes	Monocytes
GATCGCGAGTCTTGCA	pbmc8k	6777	2004	6777	2004	285	13	4.2054	6777	1.66531	Non classical monocytes	Monocytes
GCAAACTCAAGGCTCC	pbmc8k	5805	1952	5805	1952	105	13	1.80879	5805	1.42646	Non-Vd2 gd T cells	T cells
AGGTCATAGGATGTAT	pbmc8k	5658	2108	5658	2108	173	13	3.05762	5658	1.39034	Non classical monocytes	Monocytes
CGTCTACAGTGCCATT	pbmc8k	6658	2070	6658	2070	258	15	3.87504	6658	1.63606	Non classical monocytes	Monocytes
CACAAACTCCGGCACA	pbmc8k	6318	1989	6318	1989	272	14	4.30516	6318	1.55252	NA	NA
TTTCCTCAGTGCGATG	pbmc8k	6295	2247	6295	2247	217	13	3.44718	6295	1.54686	NA	NA
GGCCGATGTTGAACTC	pbmc8k	6037	2487	6037	2487	219	14	3.62763	6037	1.48347	Natural killer cells	NK cells
GTTACAGTCCAGGGCT	pbmc8k	5931	2203	5931	2203	168	14	2.83257	5931	1.45742	Plasmacytoid dendritic cells	Dendritic cells
ACTTTCACAGACTCGC	pbmc8k	4770	1852	4770	1852	243	12	5.09434	4770	1.17213	Non-switched memory B cells	B cells
TGACTAGTCCTCAATT	pbmc8k	5619	2058	5619	2058	121	14	2.15341	5619	1.38075	Plasmacytoid dendritic cells	Dendritic cells
GTGCATACAATCTGCA	pbmc8k	5910	1857	5910	1857	306	15	5.17766	5910	1.45226	Classical monocytes	Monocytes
ACGCAGCTCGGCTACG	pbmc8k	7185	2120	7185	2120	221	13	3.07585	7185	1.76556	Non classical monocytes	Monocytes
GTCACAAGTGTCGCTG	pbmc8k	6799	1978	6799	1978	319	13	4.69187	6799	1.67071	Myeloid dendritic cells	Monocytes
GGTATTGAGAAACCAT	pbmc8k	6528	1705	6528	1705	143	12	2.19056	6528	1.60412	Th2 cells	CD4+ T cells
CGTGAGCTCTCTAAGG	pbmc8k	6084	1984	6084	1984	161	11	2.64629	6084	1.49502	Naive CD4 T cells	CD4+ T cells
ATTGGACTCTGGCGAC	pbmc8k	6367	2108	6367	2108	127	11	1.99466	6367	1.56456	T regulatory cells	CD4+ T cells
TACGGGCGTCTGGAGA	pbmc8k	6249	2080	6249	2080	300	15	4.80077	6249	1.53556	Non classical monocytes	Monocytes
ACCAGTAGTATGAAAC	pbmc8k	5789	1666	5789	1666	180	12	3.10935	5789	1.42253	Naive CD8 T cells	CD8+ T cells
GACTGCGTCAGGCAAG	pbmc8k	6606	2077	6606	2077	179	12	2.70966	6606	1.62329	Central memory CD8 T cells	CD8+ T cells
CATATGGCAGGGTATG	pbmc8k	5884	2006	5884	2006	282	16	4.79266	5884	1.44587	Non classical monocytes	Monocytes
CGTCAGGTCTATGTGG	pbmc8k	7766	1962	7766	1962	149	11	1.91862	7766	1.90833	Th17 cells	CD4+ T cells
ACGCCAGTCTACCTGC	pbmc8k	6833	1752	6833	1752	147	13	2.15132	6833	1.67907	Th17 cells	CD4+ T cells
CGCCAAGTCTACCAGA	pbmc8k	6472	1957	6472	1957	376	14	5.80964	6472	1.59036	Classical monocytes	Monocytes
TGCCCTAAGAGGTTGC	pbmc8k	6818	2166	6818	2166	220	13	3.22675	6818	1.67538	Classical monocytes	Monocytes
GTTCTCGAGTCTCAAC	pbmc8k	5610	2278	5610	2278	139	11	2.47772	5610	1.37854	Natural killer cells	NK cells
TACAGTGTCACATGCA	pbmc8k	6442	1968	6442	1968	280	13	4.34648	6442	1.58299	Non classical monocytes	Monocytes
AGTGAGGTCACTGGGC	pbmc8k	7058	2249	7058	2249	361	14	5.11476	7058	1.73436	Classical monocytes	Monocytes
ACTGTCCGTTCGGCAC	pbmc8k	5969	1938	5969	1938	134	13	2.24493	5969	1.46676	Th17 cells	CD4+ T cells
GTTCGGGAGCAGCGTA	pbmc8k	6897	2172	6897	2172	139	13	2.01537	6897	1.69479	Th1 cells	T cells
CAGCTAACATGCAACT	pbmc8k	6423	2118	6423	2118	230	14	3.58088	6423	1.57832	T regulatory cells	CD4+ T cells
CGTAGCGCAGGCTCAC	pbmc8k	6737	1632	6737	1632	218	13	3.23586	6737	1.65548	Non-switched memory B cells	B cells
TTGTAGGCAGTCTTCC	pbmc8k	5539	1793	5539	1793	104	13	1.8776	5539	1.36109	Naive CD4 T cells	CD4+ T cells
AACTCCCGTGAGGGTT	pbmc8k	5063	2009	5063	2009	210	14	4.14774	5063	1.24413	Central memory CD8 T cells	T cells
ACCAGTAGTGCTGTAT	pbmc8k	6144	2038	6144	2038	311	13	5.06185	6144	1.50976	NA	NA
CTCTGGTCACAAGCCC	pbmc8k	5926	2138	5926	2138	186	13	3.13871	5926	1.45619	Plasmacytoid dendritic cells	Dendritic cells
TGCCCTAGTGCACTTA	pbmc8k	6123	1888	6123	1888	153	13	2.49878	6123	1.5046	Naive CD8 T cells	CD8+ T cells
CTAACTTTCGAGGTAG	pbmc8k	6398	1962	6398	1962	279	14	4.36074	6398	1.57218	NA	NA
CAGAGAGGTCAACTGT	pbmc8k	6858	2277	6858	2277	285	14	4.15573	6858	1.68521	NA	NA
GTCGTAAAGACAAGCC	pbmc8k	7172	2114	7172	2114	276	15	3.8483	7172	1.76237	Non classical monocytes	Monocytes
GTGCAGCGTCTTTCAT	pbmc8k	6521	2080	6521	2080	207	12	3.17436	6521	1.6024	Non-Vd2 gd T cells	T cells
CACCTTGAGCAGCGTA	pbmc8k	6563	2074	6563	2074	374	13	5.69861	6563	1.61272	NA	Monocytes
AACTCCCCAATGTAAG	pbmc8k	6216	1927	6216	1927	276	14	4.44015	6216	1.52745	Myeloid dendritic cells	Dendritic cells
CCTAAAGGTCAGAGGT	pbmc8k	6583	1891	6583	1891	317	14	4.81543	6583	1.61763	Classical monocytes	Monocytes
AGAGTGGCAGGTGCCT	pbmc8k	5793	2178	5793	2178	117	14	2.01968	5793	1.42351	Plasmacytoid dendritic cells	Dendritic cells
GTGCGGTGTGATGTCT	pbmc8k	6469	2105	6469	2105	275	14	4.25104	6469	1.58962	NA	NA
CGTTCTGGTCGTTGTA	pbmc8k	5849	1970	5849	1970	106	14	1.81228	5849	1.43727	NA	NA
AGGTCATTCCACGTTC	pbmc8k	6262	2033	6262	2033	271	14	4.32769	6262	1.53876	Classical monocytes	Monocytes
TGATTTCTCTGATTCT	pbmc8k	5097	2179	5097	2179	82	12	1.60879	5097	1.25248	T regulatory cells	CD4+ T cells
CTCGTCAAGCGATCCC	pbmc8k	6150	2172	6150	2172	218	13	3.54472	6150	1.51123	MAIT cells	T cells
CGTCCATTCCACTGGG	pbmc8k	5668	2030	5668	2030	130	14	2.29358	5668	1.39279	NA	NK cells
GCAGCCACAAAGAATC	pbmc8k	5755	1722	5755	1722	324	14	5.62989	5755	1.41417	Non-switched memory B cells	B cells
TTTATGCGTACTTAGC	pbmc8k	6318	1974	6318	1974	360	14	5.69801	6318	1.55252	Non classical monocytes	Monocytes
CGACTTCGTTCCACAA	pbmc8k	6814	2074	6814	2074	260	14	3.81567	6814	1.6744	Intermediate monocytes	Monocytes
CTGCGGAGTCGCTTTC	pbmc8k	6861	2145	6861	2145	263	15	3.83326	6861	1.68595	Classical monocytes	Monocytes
TCATTTGGTGATAAAC	pbmc8k	6307	1769	6307	1769	168	13	2.66371	6307	1.54981	Th1/Th17 cells	CD4+ T cells
TGGACGCAGCTGCAAG	pbmc8k	6197	2000	6197	2000	283	12	4.56673	6197	1.52278	Non classical monocytes	Monocytes
TGCACCTCATCATCCC	pbmc8k	6651	2215	6651	2215	303	15	4.55571	6651	1.63434	Classical monocytes	Monocytes
ACACCCTTCGGCCGAT	pbmc8k	6320	1719	6320	1719	227	13	3.59177	6320	1.55301	Non-switched memory B cells	B cells
GATGAGGAGTACGTAA	pbmc8k	6651	2031	6651	2031	286	14	4.30011	6651	1.63434	Myeloid dendritic cells	Dendritic cells
GCGCGATGTTTCGCTC	pbmc8k	6180	1914	6180	1914	186	12	3.00971	6180	1.51861	Vd2 gd T cells	CD4+ T cells
CTCGAAAAGCAGGTCA	pbmc8k	6943	2143	6943	2143	372	15	5.35791	6943	1.7061	Classical monocytes	Monocytes
CACACTCAGCTAAGAT	pbmc8k	5709	1907	5709	1907	92	11	1.61149	5709	1.40287	Th2 cells	CD4+ T cells
GCTGCAGAGCCGGTAA	pbmc8k	6002	1893	6002	1893	139	14	2.31589	6002	1.47487	Naive CD4 T cells	CD4+ T cells
TTGACTTGTCGATTGT	pbmc8k	5808	1803	5808	1803	156	13	2.68595	5808	1.42719	Naive CD4 T cells	CD8+ T cells
AGCGGTCGTGGCCCTA	pbmc8k	6347	2046	6347	2046	175	14	2.75721	6347	1.55964	NA	NK cells
CAACCAATCCACTGGG	pbmc8k	6251	1810	6251	1810	158	12	2.5276	6251	1.53605	Th2 cells	CD4+ T cells
AGAGTGGGTCCGACGT	pbmc8k	6746	1898	6746	1898	247	13	3.66143	6746	1.65769	Intermediate monocytes	Monocytes
TACCTTATCAACACAC	pbmc8k	4966	1930	4966	1930	218	14	4.38985	4966	1.22029	Non classical monocytes	Monocytes
AACTCAGTCGCTTGTC	pbmc8k	5737	1939	5737	1939	173	13	3.01551	5737	1.40975	NA	NK cells
CCGGTAGTCTCTTATG	pbmc8k	6792	2059	6792	2059	316	14	4.65253	6792	1.66899	Classical monocytes	Monocytes
AGCCTAAAGTCGATAA	pbmc8k	5451	1916	5451	1916	333	14	6.10897	5451	1.33947	NA	NA
TGCCAAAAGGCATTGG	pbmc8k	6523	2164	6523	2164	334	13	5.12034	6523	1.60289	NA	NA
TGACGGCAGCTCTCGG	pbmc8k	6051	1902	6051	1902	210	13	3.4705	6051	1.48691	Naive B cells	B cells
TTCGAAGTCCTGCTTG	pbmc8k	5509	2125	5509	2125	186	13	3.37629	5509	1.35372	T regulatory cells	CD8+ T cells
AGCGTATCACATAACC	pbmc8k	6453	2207	6453	2207	263	13	4.07562	6453	1.58569	T regulatory cells	CD4+ T cells
GGGATGAGTGGCTCCA	pbmc8k	6064	1915	6064	1915	130	12	2.1438	6064	1.4901	Naive CD4 T cells	CD4+ T cells
CTCTACGTCGGTTAAC	pbmc8k	5628	2121	5628	2121	215	13	3.82018	5628	1.38296	Plasmacytoid dendritic cells	Dendritic cells
GCTCCTAGTGACAAAT	pbmc8k	6939	2120	6939	2120	265	16	3.81899	6939	1.70511	Classical monocytes	Monocytes
TGAGGGACAACGCACC	pbmc8k	6559	2136	6559	2136	250	13	3.81156	6559	1.61174	Classical monocytes	Monocytes
TGGGAAGAGTGTACCT	pbmc8k	5382	1983	5382	1983	183	12	3.40022	5382	1.32251	NA	NK cells
TGGGAAGGTCGAACAG	pbmc8k	6428	2042	6428	2042	292	13	4.54263	6428	1.57955	Non classical monocytes	Monocytes
CGCGTTTTCGCTGATA	pbmc8k	6035	2064	6035	2064	263	14	4.35791	6035	1.48298	Non classical monocytes	Monocytes
GTTCTCGCACAGATTC	pbmc8k	6610	2063	6610	2063	126	11	1.9062	6610	1.62427	T regulatory cells	CD8+ T cells
GTGCGGTTCGAGGTAG	pbmc8k	6777	1762	6777	1762	182	12	2.68555	6777	1.66531	Th1/Th17 cells	CD4+ T cells
TAGACCAGTACAGTGG	pbmc8k	6585	1980	6585	1980	306	13	4.64692	6585	1.61813	Intermediate monocytes	Monocytes
TGCCAAATCTTGCATT	pbmc8k	6433	1832	6433	1832	145	13	2.254	6433	1.58078	Th2 cells	CD4+ T cells
TTAACTCAGTTGTAGA	pbmc8k	6754	1658	6754	1658	132	13	1.9544	6754	1.65965	Th17 cells	CD4+ T cells
CTGAAACGTCTCACCT	pbmc8k	6633	1658	6633	1658	164	13	2.47249	6633	1.62992	Th17 cells	CD4+ T cells
AAGTCTGCAATCGGTT	pbmc8k	6398	1664	6398	1664	166	15	2.59456	6398	1.57218	Th2 cells	CD4+ T cells
CAGAATCAGTATGACA	pbmc8k	5736	1682	5736	1682	146	13	2.54533	5736	1.4095	Th17 cells	CD4+ T cells
CATTCGCAGCGTGAGT	pbmc8k	6363	1866	6363	1866	198	12	3.11174	6363	1.56357	MAIT cells	T cells
TTCTCAAAGCACGCCT	pbmc8k	5376	2090	5376	2090	251	13	4.6689	5376	1.32104	Non classical monocytes	Monocytes
CTACACCTCTGTCAAG	pbmc8k	5935	2001	5935	2001	267	15	4.49874	5935	1.4584	NA	NA
CCTTCCCCATAGGATA	pbmc8k	5125	1593	5125	1593	295	15	5.7561	5125	1.25936	Non-switched memory B cells	B cells
CACTCCATCTGTCAAG	pbmc8k	5717	1674	5717	1674	192	13	3.3584	5717	1.40483	Non-switched memory B cells	B cells
TCTCATAAGTCGCCGT	pbmc8k	6156	2096	6156	2096	256	13	4.15854	6156	1.51271	Non classical monocytes	Monocytes
TCAGCTCCATCGGGTC	pbmc8k	6806	2094	6806	2094	361	14	5.30414	6806	1.67243	NA	NA
TACCTTATCACTTCAT	pbmc8k	5758	1842	5758	1842	236	13	4.09865	5758	1.41491	NA	NA
CCCATACAGTTGAGTA	pbmc8k	6429	1934	6429	1934	297	15	4.61969	6429	1.57979	Classical monocytes	Monocytes
TAAGTGCCAACTGGCC	pbmc8k	6680	1759	6680	1759	182	13	2.72455	6680	1.64147	Non-switched memory B cells	B cells
GCGAGAATCCTCAATT	pbmc8k	6087	2136	6087	2136	103	13	1.69213	6087	1.49575	T regulatory cells	CD4+ T cells
CGCGTTTAGGACATTA	pbmc8k	6819	2052	6819	2052	282	14	4.1355	6819	1.67563	Intermediate monocytes	Monocytes
GGAACTTGTACTCAAC	pbmc8k	6001	2094	6001	2094	94	13	1.56641	6001	1.47462	Plasmacytoid dendritic cells	Dendritic cells
CACACTCCACAGATTC	pbmc8k	5650	1685	5650	1685	164	14	2.90265	5650	1.38837	Th1/Th17 cells	CD4+ T cells
ACTGATGTCACATGCA	pbmc8k	6319	2074	6319	2074	313	15	4.95332	6319	1.55276	NA	NA
CGTGAGCCATCACGAT	pbmc8k	6559	2225	6559	2225	267	13	4.07074	6559	1.61174	Classical monocytes	Monocytes
TCTTCGGCAAATACAG	pbmc8k	5865	2032	5865	2032	195	13	3.32481	5865	1.4412	Non classical monocytes	Monocytes
TGCCAAATCATCGGAT	pbmc8k	5828	1810	5828	1810	132	12	2.26493	5828	1.43211	Th2 cells	CD4+ T cells
CCTAGCTAGCTTCGCG	pbmc8k	6286	1789	6286	1789	172	13	2.73624	6286	1.54465	Non-switched memory B cells	B cells
GAAACTCTCAAACAAG	pbmc8k	6484	1874	6484	1874	258	12	3.97903	6484	1.59331	Classical monocytes	Monocytes
GGTATTGGTAGGCTGA	pbmc8k	6280	2003	6280	2003	280	13	4.4586	6280	1.54318	Intermediate monocytes	Monocytes
GAATAAGCAATAGCAA	pbmc8k	6120	1693	6120	1693	123	12	2.0098	6120	1.50386	Th1/Th17 cells	CD4+ T cells
CTACATTAGACTAAGT	pbmc8k	6125	1944	6125	1944	226	13	3.6898	6125	1.50509	Classical monocytes	Monocytes
CAGCAGCTCAAGGCTT	pbmc8k	6703	1907	6703	1907	135	11	2.01402	6703	1.64712	Th1/Th17 cells	CD4+ T cells
CTTGGCTCACAGACAG	pbmc8k	5395	1889	5395	1889	182	13	3.37349	5395	1.32571	Vd2 gd T cells	T cells
TTAGGCACAATGGAGC	pbmc8k	7666	2249	7666	2249	451	14	5.88312	7666	1.88376	Classical monocytes	Monocytes
CATCCACGTCGCTTCT	pbmc8k	6169	1733	6169	1733	189	12	3.06371	6169	1.5159	Non-switched memory B cells	B cells
CTGCGGAAGGACTGGT	pbmc8k	6515	2124	6515	2124	284	12	4.35917	6515	1.60093	Classical monocytes	Monocytes
CAGCTGGGTACCGCTG	pbmc8k	6353	2062	6353	2062	264	12	4.15552	6353	1.56112	Classical monocytes	Monocytes
CTCGAGGTCCTGTACC	pbmc8k	6057	1803	6057	1803	229	13	3.78075	6057	1.48838	NA	NA
GTATTCTAGGACGAAA	pbmc8k	5984	1601	5984	1601	152	14	2.54011	5984	1.47044	Naive CD8 T cells	CD8+ T cells
ACACCAATCAGTTCGA	pbmc8k	5719	1813	5719	1813	171	12	2.99003	5719	1.40532	Non-switched memory B cells	B cells
GTTAAGCAGATGCCTT	pbmc8k	5586	1998	5586	1998	124	14	2.21984	5586	1.37264	Plasmacytoid dendritic cells	Dendritic cells
TCGCGTTCAGTTCCCT	pbmc8k	5514	2000	5514	2000	166	12	3.01052	5514	1.35495	NA	NA
CGATGTAAGGGCTTCC	pbmc8k	5118	1816	5118	1816	418	14	8.16725	5118	1.25764	Classical monocytes	Monocytes
ACTTGTTCATCCTTGC	pbmc8k	5850	1959	5850	1959	182	13	3.11111	5850	1.43752	NA	NA
TACGGATAGCCCAACC	pbmc8k	5227	1918	5227	1918	349	13	6.67687	5227	1.28443	Non classical monocytes	Monocytes
CTAAGACGTCGACTGC	pbmc8k	6770	2113	6770	2113	254	13	3.75185	6770	1.66359	Myeloid dendritic cells	Dendritic cells
GAACGGAAGGGCTTGA	pbmc8k	6050	2305	6050	2305	102	13	1.68595	6050	1.48666	Plasmacytoid dendritic cells	Dendritic cells
CACACAACATGGTTGT	pbmc8k	6851	2038	6851	2038	292	15	4.26215	6851	1.68349	Classical monocytes	Monocytes
AGCGGTCCATGTCTCC	pbmc8k	6689	1973	6689	1973	280	13	4.18598	6689	1.64368	Th1/Th17 cells	CD4+ T cells
AGATCTGCAGGGATTG	pbmc8k	6742	1779	6742	1779	184	13	2.72916	6742	1.65671	Th2 cells	CD4+ T cells
GCTGCTTCACAGTCGC	pbmc8k	5481	2070	5481	2070	149	13	2.71848	5481	1.34684	Non-Vd2 gd T cells	NK cells
CGGAGTCAGGGAACGG	pbmc8k	6712	1955	6712	1955	212	13	3.15852	6712	1.64933	Th2 cells	CD4+ T cells
GAATAAGTCTGGAGCC	pbmc8k	6452	1827	6452	1827	115	13	1.78239	6452	1.58544	Th1/Th17 cells	CD4+ T cells
CGAGCACTCGCGATCG	pbmc8k	7380	2183	7380	2183	291	13	3.94309	7380	1.81348	Non classical monocytes	Monocytes
GCTCTGTTCCGAGCCA	pbmc8k	6034	1795	6034	1795	99	13	1.6407	6034	1.48273	Progenitor cells	Progenitors
GACGGCTCATTGGTAC	pbmc8k	5422	1814	5422	1814	120	14	2.21321	5422	1.33234	NA	NA
CTGATAGGTCATGCAT	pbmc8k	6123	1878	6123	1878	166	13	2.71109	6123	1.5046	Naive B cells	B cells
TTCTACAAGTGTTGAA	pbmc8k	4622	1533	4622	1533	190	14	4.11077	4622	1.13576	Naive CD4 T cells	CD4+ T cells
GACTGCGGTCGCCATG	pbmc8k	6894	2112	6894	2112	200	13	2.90107	6894	1.69406	NA	NA
TACTTGTCATACAGCT	pbmc8k	5968	1890	5968	1890	136	13	2.27882	5968	1.46651	Th17 cells	CD4+ T cells
ATCATGGGTACAGCAG	pbmc8k	5726	1902	5726	1902	242	13	4.22634	5726	1.40705	Non classical monocytes	Monocytes
ACGGCCATCACTTATC	pbmc8k	6014	1731	6014	1731	152	12	2.52744	6014	1.47782	Naive CD4 T cells	CD8+ T cells
GGCAATTAGAGAGCTC	pbmc8k	6830	2130	6830	2130	359	15	5.25622	6830	1.67833	Classical monocytes	Monocytes
AAGGCAGCAAATTGCC	pbmc8k	5659	1792	5659	1792	244	14	4.31172	5659	1.39058	Non-switched memory B cells	B cells
GAATGAACAACAACCT	pbmc8k	5892	2005	5892	2005	216	12	3.66599	5892	1.44784	Non classical monocytes	Monocytes
CGTCACTTCGGAATCT	pbmc8k	6170	1826	6170	1826	157	13	2.54457	6170	1.51615	Th1/Th17 cells	CD4+ T cells
GTTCATTCATCGTCGG	pbmc8k	5541	1827	5541	1827	170	13	3.06804	5541	1.36159	Th2 cells	CD4+ T cells
TACGGGCGTAGAGTGC	pbmc8k	6232	2032	6232	2032	386	13	6.19384	6232	1.53138	Classical monocytes	Monocytes
GCGACCACACCCATTC	pbmc8k	5379	1768	5379	1768	277	14	5.14966	5379	1.32178	Non classical monocytes	Monocytes
GTGCTTCCAGGTCCAC	pbmc8k	6016	1887	6016	1887	260	13	4.32181	6016	1.47831	Classical monocytes	Monocytes
GTCGGGTTCCAATGGT	pbmc8k	5907	2163	5907	2163	265	12	4.4862	5907	1.45152	Non classical monocytes	Monocytes
GTGAAGGCAGGCAGTA	pbmc8k	5475	1784	5475	1784	232	12	4.23744	5475	1.34537	Naive CD8 T cells	CD8+ T cells
CCTTCCCTCACGAAGG	pbmc8k	6243	1899	6243	1899	129	12	2.06631	6243	1.53409	T regulatory cells	CD4+ T cells
CTACATTAGCCCGAAA	pbmc8k	5282	1627	5282	1627	150	13	2.83983	5282	1.29794	Non-switched memory B cells	B cells
CTCGTCACAATAGCAA	pbmc8k	5983	2001	5983	2001	145	12	2.42353	5983	1.4702	T regulatory cells	CD4+ T cells
CCTATTATCTTACCGC	pbmc8k	6048	1908	6048	1908	359	14	5.93585	6048	1.48617	Classical monocytes	Monocytes
TGACAACTCTACTCAT	pbmc8k	5820	2031	5820	2031	85	11	1.46048	5820	1.43014	T regulatory cells	CD4+ T cells
AGGTCCGAGCTACCTA	pbmc8k	5845	2211	5845	2211	149	14	2.54919	5845	1.43629	Plasmacytoid dendritic cells	Dendritic cells
ACGTCAACAAATTGCC	pbmc8k	4765	1823	4765	1823	233	13	4.88982	4765	1.1709	Non classical monocytes	Monocytes
TCAATCTTCACCACCT	pbmc8k	6389	1873	6389	1873	302	15	4.72687	6389	1.56996	NA	NA
GAAGCAGAGTCATGCT	pbmc8k	6288	1937	6288	1937	224	14	3.56234	6288	1.54514	Non classical monocytes	Monocytes
TACACGACAAGTAATG	pbmc8k	5847	1827	5847	1827	214	14	3.66	5847	1.43678	NA	NA
TTCTCCTAGTCAATAG	pbmc8k	5360	2013	5360	2013	214	12	3.99254	5360	1.31711	Non classical monocytes	Monocytes
TGAGCATTCTGTTTGT	pbmc8k	5172	1917	5172	1917	138	12	2.66821	5172	1.27091	Non classical monocytes	Monocytes
ACGGAGAGTTTAAGCC	pbmc8k	5870	2002	5870	2002	312	16	5.31516	5870	1.44243	Classical monocytes	Monocytes
CTAATGGCACGACTCG	pbmc8k	4645	1810	4645	1810	146	13	3.14316	4645	1.14141	Non-switched memory B cells	B cells
GCAATCAGTACCGTTA	pbmc8k	5719	1916	5719	1916	305	15	5.3331	5719	1.40532	NA	NA
ACTGTCCTCTAGAGTC	pbmc8k	6096	1771	6096	1771	137	11	2.24738	6096	1.49796	Th17 cells	CD4+ T cells
ACCCACTCATGCGCAC	pbmc8k	4772	1713	4772	1713	134	12	2.80805	4772	1.17262	NA	NA
CGTCTACTCTACTTAC	pbmc8k	5456	1795	5456	1795	104	13	1.90616	5456	1.3407	Naive CD8 T cells	CD8+ T cells
GAATAAGTCTATCCCG	pbmc8k	6103	1777	6103	1777	84	13	1.37637	6103	1.49968	Th1/Th17 cells	CD4+ T cells
TGCGCAGCAGATGGGT	pbmc8k	5864	1894	5864	1894	167	13	2.84789	5864	1.44096	NA	NA
CCGGTAGCATATGAGA	pbmc8k	6835	1981	6835	1981	189	12	2.76518	6835	1.67956	Th1/Th17 cells	CD4+ T cells
ACCGTAACAGACAAGC	pbmc8k	6299	1640	6299	1640	87	13	1.38117	6299	1.54785	Th2 cells	CD4+ T cells
TCTGAGAAGTAGATGT	pbmc8k	6250	1895	6250	1895	329	13	5.264	6250	1.53581	NA	NA
GAACATCGTAATCACC	pbmc8k	6234	1826	6234	1826	162	12	2.59865	6234	1.53188	Th17 cells	CD4+ T cells
TAGACCATCATGTGGT	pbmc8k	6326	1970	6326	1970	257	13	4.0626	6326	1.55448	Myeloid dendritic cells	Monocytes
GCACATACATCCCATC	pbmc8k	5764	1943	5764	1943	46	12	0.798057	5764	1.41638	Plasmacytoid dendritic cells	Dendritic cells
GCCTCTAAGAAGAAGC	pbmc8k	5685	1985	5685	1985	211	12	3.71152	5685	1.39697	Non classical monocytes	Monocytes
AACACGTTCAGCTCTC	pbmc8k	6221	1817	6221	1817	157	13	2.52371	6221	1.52868	Th1/Th17 cells	CD4+ T cells
GACCTGGAGATCGGGT	pbmc8k	5733	1991	5733	1991	209	14	3.64556	5733	1.40877	Non classical monocytes	Monocytes
GGCCGATCAGCTTCGG	pbmc8k	6589	2061	6589	2061	249	14	3.77903	6589	1.61911	Classical monocytes	Monocytes
ACGGAGACACCACCAG	pbmc8k	6239	2019	6239	2019	331	16	5.30534	6239	1.5331	NA	NA
TGAGGGACACCGCTAG	pbmc8k	6242	1704	6242	1704	177	12	2.83563	6242	1.53384	Th17 cells	CD4+ T cells
GCGAGAAGTAGCTAAA	pbmc8k	6294	1792	6294	1792	107	12	1.70003	6294	1.54662	Th2 cells	CD4+ T cells
CGACTTCAGTACGTAA	pbmc8k	6099	1703	6099	1703	184	14	3.01689	6099	1.4987	Th1/Th17 cells	CD4+ T cells
GATGAGGGTAGCGCTC	pbmc8k	6545	1975	6545	1975	302	12	4.61421	6545	1.6083	Classical monocytes	Monocytes
TCTTTCCAGCTAAACA	pbmc8k	6249	1774	6249	1774	136	15	2.17635	6249	1.53556	Th1/Th17 cells	CD4+ T cells
AGCCTAACACTATCTT	pbmc8k	5524	1719	5524	1719	103	13	1.86459	5524	1.35741	Naive CD4 T cells	CD4+ T cells
AACACGTGTACATGTC	pbmc8k	5500	1832	5500	1832	162	13	2.94545	5500	1.35151	Central memory CD8 T cells	CD8+ T cells
CTTAGGATCAGCTCGG	pbmc8k	6731	2045	6731	2045	203	15	3.0159	6731	1.654	NA	NA
CACTCCAGTCGCGGTT	pbmc8k	5790	1932	5790	1932	244	13	4.21416	5790	1.42277	Non classical monocytes	Monocytes
AACGTTGTCGTCTGCT	pbmc8k	5314	1690	5314	1690	111	13	2.08882	5314	1.3058	Naive CD4 T cells	CD4+ T cells
CAGTAACGTAAGAGAG	pbmc8k	6540	1737	6540	1737	199	13	3.04281	6540	1.60707	Th1/Th17 cells	CD4+ T cells
CATATTCCAATCGAAA	pbmc8k	5488	1675	5488	1675	174	14	3.17055	5488	1.34856	Naive CD8 T cells	CD8+ T cells
GCGCAGTTCGAGGTAG	pbmc8k	5369	1783	5369	1783	154	15	2.86832	5369	1.31932	NA	B cells
GATGAAAAGACAATAC	pbmc8k	5277	1626	5277	1626	162	13	3.06993	5277	1.29671	Naive CD8 T cells	CD8+ T cells
ACTTACTTCGTTGACA	pbmc8k	5560	1844	5560	1844	274	13	4.92806	5560	1.36625	Non-switched memory B cells	B cells
AGGCCACAGCCTCGTG	pbmc8k	5792	2060	5792	2060	112	13	1.9337	5792	1.42326	Plasmacytoid dendritic cells	Dendritic cells
ATCACGATCTTGTTTG	pbmc8k	5292	1861	5292	1861	177	12	3.34467	5292	1.3004	Non-switched memory B cells	B cells
TGAGCATTCGTTTGCC	pbmc8k	5987	1745	5987	1745	254	13	4.24253	5987	1.47118	Non-switched memory B cells	B cells
CAGCAGCGTGCATCTA	pbmc8k	5658	1907	5658	1907	183	13	3.23436	5658	1.39034	Non classical monocytes	Monocytes
CTCGTACTCGCGCCAA	pbmc8k	6829	2103	6829	2103	329	15	4.81769	6829	1.67808	Myeloid dendritic cells	Monocytes
TTCTCAAGTACTTCTT	pbmc8k	5907	2051	5907	2051	299	14	5.06179	5907	1.45152	NA	NA
GTCCTCATCAACACCA	pbmc8k	6313	2116	6313	2116	251	14	3.97592	6313	1.55129	Classical monocytes	NA
AAAGTAGCACCAACCG	pbmc8k	5820	1865	5820	1865	257	12	4.41581	5820	1.43014	NA	NA
TCTTTCCCACGACGAA	pbmc8k	5603	1789	5603	1789	195	15	3.48028	5603	1.37682	Non-switched memory B cells	B cells
AGCGGTCCATACTCTT	pbmc8k	7064	1754	7064	1754	210	12	2.97282	7064	1.73583	Classical monocytes	Monocytes
CATATTCGTGAGGCTA	pbmc8k	6479	2022	6479	2022	275	13	4.24448	6479	1.59208	Classical monocytes	Monocytes
TCTTTCCCAATGAATG	pbmc8k	5464	1624	5464	1624	157	13	2.87335	5464	1.34266	Non-switched memory B cells	B cells
TTATGCTAGGCACATG	pbmc8k	6418	1933	6418	1933	198	13	3.08507	6418	1.57709	Intermediate monocytes	Monocytes
AAGCCGCAGTGTACTC	pbmc8k	6663	2057	6663	2057	203	13	3.04668	6663	1.63729	Classical monocytes	Monocytes
ACGCAGCGTCTACCTC	pbmc8k	5833	2006	5833	2006	138	13	2.36585	5833	1.43334	Plasmacytoid dendritic cells	Dendritic cells
TGCGGGTCAAAGGAAG	pbmc8k	6231	2013	6231	2013	299	14	4.79859	6231	1.53114	NA	NA
CGCCAAGAGCTAGTCT	pbmc8k	5379	1819	5379	1819	147	13	2.73285	5379	1.32178	Naive B cells	B cells
CGCGTTTCAGCTTAAC	pbmc8k	6432	1687	6432	1687	185	13	2.87624	6432	1.58053	Naive CD8 T cells	CD8+ T cells
GAACGGACAGTAAGAT	pbmc8k	6484	2010	6484	2010	235	13	3.62431	6484	1.59331	Intermediate monocytes	Monocytes
GGCGACTCAATCACAC	pbmc8k	6092	2009	6092	2009	315	15	5.17072	6092	1.49698	Classical monocytes	Monocytes
TAGGCATCACATGACT	pbmc8k	6108	1788	6108	1788	175	14	2.86509	6108	1.50091	Non classical monocytes	Monocytes
CCTCAGTAGGGAACGG	pbmc8k	6076	1914	6076	1914	225	14	3.70309	6076	1.49305	Classical monocytes	Monocytes
GGCCGATAGCAATATG	pbmc8k	5936	1628	5936	1628	258	13	4.34636	5936	1.45865	Exhausted B cells	B cells
TACCTATAGCTTATCG	pbmc8k	5454	1590	5454	1590	153	12	2.80528	5454	1.34021	Naive CD8 T cells	CD8+ T cells
CCTTACGCATAGACTC	pbmc8k	6066	1785	6066	1785	128	14	2.11012	6066	1.49059	Th17 cells	CD4+ T cells
CCCAGTTCACCATGTA	pbmc8k	5882	1641	5882	1641	131	12	2.22713	5882	1.44538	Th2 cells	CD4+ T cells
CGTGTCTGTTCATGGT	pbmc8k	7360	2275	7360	2275	401	14	5.44837	7360	1.80857	Classical monocytes	Monocytes
AGTAGTCCACCTGGTG	pbmc8k	6197	1756	6197	1756	129	13	2.08165	6197	1.52278	Th2 cells	CD4+ T cells
TTTCCTCAGTGGGATC	pbmc8k	4375	1647	4375	1647	164	15	3.74857	4375	1.07506	Naive CD4 T cells	CD4+ T cells
ATCATGGCAATGGATA	pbmc8k	5671	1982	5671	1982	239	13	4.21442	5671	1.39353	NA	NA
ACTTGTTTCTTCGGTC	pbmc8k	5607	1971	5607	1971	304	15	5.42179	5607	1.3778	Non classical monocytes	Monocytes
TCTATTGTCAATAAGG	pbmc8k	5510	1831	5510	1831	172	12	3.1216	5510	1.35397	Vd2 gd T cells	T cells
CCTCAGTAGGCTATCT	pbmc8k	5407	1624	5407	1624	113	13	2.08988	5407	1.32866	Naive CD8 T cells	CD8+ T cells
CACCTTGTCCTGCAGG	pbmc8k	5888	1770	5888	1770	110	13	1.86821	5888	1.44685	T regulatory cells	CD4+ T cells
GCAAACTCACGGACAA	pbmc8k	6235	1971	6235	1971	211	13	3.38412	6235	1.53212	Classical monocytes	Monocytes
GCAGTTATCATGTCCC	pbmc8k	5957	1685	5957	1685	115	13	1.9305	5957	1.46381	T regulatory cells	CD4+ T cells
CTGCGGAAGAGTGACC	pbmc8k	6506	1978	6506	1978	288	13	4.42668	6506	1.59871	Vd2 gd T cells	T cells
CCTACACGTATCAGTC	pbmc8k	5586	1833	5586	1833	106	14	1.8976	5586	1.37264	Th1/Th17 cells	CD4+ T cells
TACAGTGCACGTGAGA	pbmc8k	5798	1860	5798	1860	100	13	1.72473	5798	1.42474	T regulatory cells	CD4+ T cells
AGCCTAACACAGATTC	pbmc8k	5403	1675	5403	1675	136	12	2.51712	5403	1.32767	Naive CD4 T cells	CD4+ T cells
CAGTCCTTCTTCAACT	pbmc8k	5241	1845	5241	1845	121	13	2.30872	5241	1.28787	Th17 cells	CD4+ T cells
CGTTAGACATCTCCCA	pbmc8k	6016	2005	6016	2005	233	15	3.87301	6016	1.47831	Classical monocytes	Monocytes
TTTGGTTTCCAAGCCG	pbmc8k	5821	1987	5821	1987	258	14	4.43223	5821	1.43039	Non classical monocytes	Monocytes
ACGGAGACAGTAAGCG	pbmc8k	6292	1977	6292	1977	165	14	2.62238	6292	1.54613	Classical monocytes	Monocytes
GGTGCGTTCCACGAAT	pbmc8k	6029	1803	6029	1803	149	13	2.47139	6029	1.4815	Th17 cells	CD4+ T cells
GTACTCCAGAGGACGG	pbmc8k	5500	1703	5500	1703	193	14	3.50909	5500	1.35151	Vd2 gd T cells	T cells
GAACCTAGTCTTGATG	pbmc8k	6049	1904	6049	1904	223	15	3.68656	6049	1.48642	Classical monocytes	Monocytes
CTACACCAGGCAATTA	pbmc8k	5544	1813	5544	1813	227	13	4.09452	5544	1.36232	Intermediate monocytes	Monocytes
CAACCTCAGAGACGAA	pbmc8k	6105	1585	6105	1585	119	12	1.94922	6105	1.50018	Th2 cells	CD4+ T cells
CGCTGGAAGCTAGCCC	pbmc8k	5838	1964	5838	1964	319	15	5.4642	5838	1.43457	NA	NA
TTCTCAATCATCGGAT	pbmc8k	5427	1908	5427	1908	153	13	2.81924	5427	1.33357	MAIT cells	NA
ACCGTAATCCCTAATT	pbmc8k	4870	1658	4870	1658	123	13	2.52567	4870	1.1967	Th2 cells	CD4+ T cells
TGGCCAGCAATGAATG	pbmc8k	5661	1848	5661	1848	289	14	5.10511	5661	1.39107	Intermediate monocytes	Monocytes
TGCACCTTCAGCTGGC	pbmc8k	5837	1989	5837	1989	144	12	2.46702	5837	1.43432	T regulatory cells	CD4+ T cells
ATGTGTGCATCACCCT	pbmc8k	5805	1874	5805	1874	151	14	2.60121	5805	1.42646	Th1/Th17 cells	CD4+ T cells
CTGTTTACATTAACCG	pbmc8k	4953	1688	4953	1688	183	14	3.69473	4953	1.2171	Th17 cells	CD4+ T cells
TGACGGCAGATGGCGT	pbmc8k	6384	2009	6384	2009	269	15	4.21366	6384	1.56873	Classical monocytes	Monocytes
ATCACGAGTACCGGCT	pbmc8k	5124	1803	5124	1803	183	13	3.57143	5124	1.25912	NA	NA
TCCACACAGCTTATCG	pbmc8k	4419	1866	4419	1866	161	13	3.64336	4419	1.08588	Vd2 gd T cells	T cells
GACTGCGCAAGTTCTG	pbmc8k	5025	1924	5025	1924	227	14	4.51741	5025	1.23479	Plasmacytoid dendritic cells	Dendritic cells
CCAATCCAGTGGAGAA	pbmc8k	6142	1830	6142	1830	113	12	1.83979	6142	1.50927	Th1/Th17 cells	CD4+ T cells
CCGTTCACAGTAACGG	pbmc8k	6531	1610	6531	1610	164	13	2.5111	6531	1.60486	Th1/Th17 cells	CD4+ T cells
TGGGCGTAGTTGTCGT	pbmc8k	6474	1906	6474	1906	113	12	1.74544	6474	1.59085	Th2 cells	CD4+ T cells
TGGCCAGGTAGCTGCC	pbmc8k	6300	1686	6300	1686	129	13	2.04762	6300	1.54809	Follicular helper T cells	CD4+ T cells
GGGCACTTCCTTGACC	pbmc8k	5411	1796	5411	1796	257	14	4.74958	5411	1.32964	Non-switched memory B cells	B cells
ATAAGAGGTAAACACA	pbmc8k	6111	1978	6111	1978	288	13	4.71281	6111	1.50165	Intermediate monocytes	Monocytes
GAGGTGACAAGGACTG	pbmc8k	5003	1724	5003	1724	146	14	2.91825	5003	1.22938	Naive B cells	B cells
TGGCCAGGTCGAGTTT	pbmc8k	6290	2008	6290	2008	382	17	6.07313	6290	1.54564	Classical monocytes	Monocytes
AGAGCTTGTTCGCTAA	pbmc8k	5885	1940	5885	1940	251	14	4.26508	5885	1.44612	Intermediate monocytes	Monocytes
CACCAGGTCTTCAACT	pbmc8k	5689	1605	5689	1605	146	12	2.56636	5689	1.39795	Naive CD8 T cells	CD8+ T cells
GCTGCAGAGCCAGGAT	pbmc8k	5391	1834	5391	1834	150	13	2.78242	5391	1.32473	NA	NA
TGCCCATGTCTCATCC	pbmc8k	6204	1754	6204	1754	167	13	2.69181	6204	1.5245	Non-switched memory B cells	B cells
GCAGTTACAAGAGTCG	pbmc8k	5320	1709	5320	1709	220	13	4.13534	5320	1.30728	Non-switched memory B cells	B cells
TGTCCCATCTTTACGT	pbmc8k	5587	1777	5587	1777	94	13	1.68248	5587	1.37289	Th17 cells	CD4+ T cells
ATGAGGGCAATCACAC	pbmc8k	5951	1676	5951	1676	145	14	2.43657	5951	1.46233	NA	CD4+ T cells
CATATGGGTTGATTGC	pbmc8k	6168	2014	6168	2014	246	14	3.98833	6168	1.51566	Non classical monocytes	Monocytes
AGAGTGGGTTTACTCT	pbmc8k	6164	1587	6164	1587	116	13	1.88189	6164	1.51467	Th1/Th17 cells	CD4+ T cells
GATCGATCACTTACGA	pbmc8k	6034	1999	6034	1999	189	12	3.13225	6034	1.48273	Myeloid dendritic cells	Monocytes
CACACTCAGTACGTTC	pbmc8k	5556	1775	5556	1775	153	12	2.75378	5556	1.36527	Th17 cells	CD4+ T cells
TGCCAAAAGTCCCACG	pbmc8k	6174	1950	6174	1950	244	13	3.95206	6174	1.51713	Classical monocytes	Monocytes
GGAACTTAGTACACCT	pbmc8k	4550	1792	4550	1792	175	13	3.84615	4550	1.11807	Non classical monocytes	Monocytes
ACGGGCTAGGAGCGAG	pbmc8k	6546	1655	6546	1655	197	12	3.00947	6546	1.60854	Th17 cells	CD4+ T cells
CTGTGCTAGCCCAGCT	pbmc8k	5922	1871	5922	1871	282	13	4.7619	5922	1.45521	Intermediate monocytes	Monocytes
ACCTTTACATGTCCTC	pbmc8k	5660	1780	5660	1780	211	13	3.72792	5660	1.39083	Classical monocytes	Monocytes
CGACTTCTCGATCCCT	pbmc8k	4960	1702	4960	1702	135	12	2.72177	4960	1.21882	Naive CD4 T cells	CD4+ T cells
GGCTCGAGTCTTCTCG	pbmc8k	5135	1900	5135	1900	145	11	2.82376	5135	1.26182	Non-Vd2 gd T cells	NA
TAGGCATTCCTTGACC	pbmc8k	6479	2111	6479	2111	278	15	4.29079	6479	1.59208	NA	NA
GCTTCCATCCCAGGTG	pbmc8k	6258	1985	6258	1985	274	12	4.3784	6258	1.53777	Myeloid dendritic cells	Monocytes
CGGAGCTGTGGACGAT	pbmc8k	6463	1939	6463	1939	389	17	6.01888	6463	1.58815	Classical monocytes	Monocytes
GTCCTCACAATGTAAG	pbmc8k	5458	1564	5458	1564	152	13	2.7849	5458	1.34119	Naive CD8 T cells	CD8+ T cells
CTTAGGAAGCTACCTA	pbmc8k	5157	1746	5157	1746	217	12	4.20787	5157	1.26723	Intermediate monocytes	Monocytes
CGAGAAGGTGTTTGGT	pbmc8k	5719	1638	5719	1638	212	13	3.70694	5719	1.40532	Non-switched memory B cells	B cells
TAAGAGATCAAAGTAG	pbmc8k	5451	1945	5451	1945	193	15	3.54063	5451	1.33947	Non classical monocytes	Monocytes
CCACGGAGTTAGGGTG	pbmc8k	5508	1804	5508	1804	210	13	3.81264	5508	1.35348	Intermediate monocytes	Monocytes
GGAACTTTCATGTGGT	pbmc8k	5618	1781	5618	1781	142	13	2.52759	5618	1.38051	Naive CD8 T cells	CD8+ T cells
ACTGCTCTCGGATGGA	pbmc8k	5781	1669	5781	1669	205	13	3.5461	5781	1.42056	Naive CD8 T cells	CD8+ T cells
TATTACCAGGTGTTAA	pbmc8k	4988	2247	4988	2247	110	14	2.20529	4988	1.2257	Natural killer cells	NK cells
TGTTCCGCAGCCTTGG	pbmc8k	6274	1716	6274	1716	208	14	3.31527	6274	1.5417	Naive CD8 T cells	CD8+ T cells
GCAGCCACAACACGCC	pbmc8k	6136	1852	6136	1852	257	14	4.1884	6136	1.50779	Classical monocytes	Monocytes
TTAGGCACAAACCTAC	pbmc8k	5663	1794	5663	1794	334	15	5.89793	5663	1.39156	Classical monocytes	Monocytes
GAGGTGATCTAACTGG	pbmc8k	5731	1659	5731	1659	138	13	2.40796	5731	1.40827	Naive CD8 T cells	CD8+ T cells
CCAGCGAAGATGTTAG	pbmc8k	5759	1939	5759	1939	346	16	6.00799	5759	1.41515	Classical monocytes	Monocytes
ACATGGTCAAGACGTG	pbmc8k	5093	1996	5093	1996	241	12	4.73199	5093	1.2515	Non classical monocytes	Monocytes
ACGGAGATCACGGTTA	pbmc8k	5042	1954	5042	1954	181	13	3.58985	5042	1.23897	NA	NA
AGGGATGGTCCGCTGA	pbmc8k	6525	1854	6525	1854	252	13	3.86207	6525	1.60338	Classical monocytes	Monocytes
TCAATCTGTTGAGTTC	pbmc8k	6508	2011	6508	2011	274	13	4.2102	6508	1.59921	Classical monocytes	Monocytes
GGTGTTAAGTATTGGA	pbmc8k	5536	1562	5536	1562	154	12	2.78179	5536	1.36036	Th1/Th17 cells	CD4+ T cells
AAGGTTCCAATGTAAG	pbmc8k	5864	1920	5864	1920	400	15	6.82128	5864	1.44096	Classical monocytes	Monocytes
GATGCTATCCTTTCTC	pbmc8k	5850	1561	5850	1561	135	12	2.30769	5850	1.43752	Th1/Th17 cells	CD4+ T cells
ATCATCTTCCGTACAA	pbmc8k	4619	1591	4619	1591	137	13	2.96601	4619	1.13502	Non-switched memory B cells	B cells
AACTTTCCAGCATACT	pbmc8k	5288	1689	5288	1689	96	12	1.81543	5288	1.29942	Th2 cells	CD4+ T cells
CGGTTAATCGCGTTTC	pbmc8k	6126	2054	6126	2054	217	15	3.54228	6126	1.50534	Classical monocytes	Monocytes
CGCGGTATCTGCAAGT	pbmc8k	6935	2028	6935	2028	239	12	3.44629	6935	1.70413	Myeloid dendritic cells	Dendritic cells
ACTGAACCACAGATTC	pbmc8k	5692	1886	5692	1886	220	16	3.86507	5692	1.39869	Classical monocytes	Monocytes
TGGGAAGGTTTGGGCC	pbmc8k	5561	2135	5561	2135	119	12	2.1399	5561	1.3665	Plasmacytoid dendritic cells	Dendritic cells
TACACGACATCACGTA	pbmc8k	5108	1731	5108	1731	176	13	3.44558	5108	1.25518	Non-switched memory B cells	B cells
GCCTCTATCCATTCTA	pbmc8k	4586	1586	4586	1586	226	14	4.92804	4586	1.12691	Naive CD4 T cells	CD4+ T cells
TCCACACAGGAATCGC	pbmc8k	5807	1894	5807	1894	296	13	5.0973	5807	1.42695	Intermediate monocytes	Monocytes
ACGCAGCTCTACTCAT	pbmc8k	5743	1522	5743	1522	174	13	3.02978	5743	1.41122	Non-switched memory B cells	B cells
TCTCATAGTCAACATC	pbmc8k	5555	1797	5555	1797	98	12	1.76418	5555	1.36503	Th17 cells	CD4+ T cells
ACGCAGCTCACGACTA	pbmc8k	4694	1692	4694	1692	200	14	4.26076	4694	1.15345	Intermediate monocytes	Monocytes
AGGGATGCAAGGTTCT	pbmc8k	5821	1912	5821	1912	156	13	2.67995	5821	1.43039	Non classical monocytes	Monocytes
CTTACCGTCAGCATGT	pbmc8k	5284	1573	5284	1573	160	13	3.02801	5284	1.29843	Naive CD4 T cells	CD4+ T cells
GAGGTGAAGATACACA	pbmc8k	4154	1825	4154	1825	100	13	2.40732	4154	1.02076	T regulatory cells	CD4+ T cells
ATGGGAGAGCTAAACA	pbmc8k	5969	1882	5969	1882	318	15	5.32753	5969	1.46676	Classical monocytes	Monocytes
TACGGATGTAAGTAGT	pbmc8k	5579	1797	5579	1797	198	12	3.54902	5579	1.37092	Th17 cells	CD4+ T cells
TCTCTAATCGAGGTAG	pbmc8k	4858	1722	4858	1722	102	12	2.09963	4858	1.19375	Naive CD4 T cells	CD4+ T cells
GGCGACTTCAGCTCTC	pbmc8k	5812	1828	5812	1828	198	13	3.40674	5812	1.42818	Non-switched memory B cells	B cells
CAGTAACTCGGTCCGA	pbmc8k	5627	1799	5627	1799	182	13	3.23441	5627	1.38272	Intermediate monocytes	Monocytes
GACACGCAGCTATGCT	pbmc8k	5121	1781	5121	1781	206	14	4.02265	5121	1.25838	Non classical monocytes	Monocytes
CACATTTCAGATTGCT	pbmc8k	4767	1900	4767	1900	138	13	2.8949	4767	1.17139	T regulatory cells	CD4+ T cells
TTTCCTCAGACAGAGA	pbmc8k	5389	1929	5389	1929	258	14	4.78753	5389	1.32423	Classical monocytes	Monocytes
AACACGTTCGTTTATC	pbmc8k	5233	1645	5233	1645	109	14	2.08294	5233	1.2859	Th2 cells	CD4+ T cells
CATGCCTTCAGCTCGG	pbmc8k	4866	1680	4866	1680	136	13	2.7949	4866	1.19572	NA	NA
GGTGAAGGTAAGTAGT	pbmc8k	5504	1633	5504	1633	141	13	2.56177	5504	1.35249	Naive CD8 T cells	CD8+ T cells
CATCGAAAGGCGCTCT	pbmc8k	6027	2178	6027	2178	164	14	2.72109	6027	1.48101	Plasmacytoid dendritic cells	Dendritic cells
ACGGCCAGTTCAACCA	pbmc8k	4817	1762	4817	1762	76	13	1.57775	4817	1.18368	Plasmacytoid dendritic cells	Dendritic cells
TTTGCGCGTAAATGAC	pbmc8k	5926	1682	5926	1682	201	15	3.39183	5926	1.45619	Non-switched memory B cells	B cells
CTAACTTTCTTCGAGA	pbmc8k	5441	1668	5441	1668	133	14	2.4444	5441	1.33701	Central memory CD8 T cells	CD8+ T cells
GGTGTTAGTCGGGTCT	pbmc8k	5521	1814	5521	1814	275	15	4.98098	5521	1.35667	NA	NA
CCTAAAGCAGCTCCGA	pbmc8k	6080	1893	6080	1893	232	12	3.81579	6080	1.49403	Intermediate monocytes	Monocytes
TCAACGAAGCTCTCGG	pbmc8k	5937	1796	5937	1796	298	14	5.01937	5937	1.45889	NA	NA
AGTAGTCTCTACCTGC	pbmc8k	5709	1682	5709	1682	194	14	3.39814	5709	1.40287	Naive CD8 T cells	CD8+ T cells
TTTACTGCACGAAAGC	pbmc8k	6108	1881	6108	1881	227	14	3.71644	6108	1.50091	Intermediate monocytes	Monocytes
TGGGAAGTCAGTCAGT	pbmc8k	5740	1625	5740	1625	142	13	2.47387	5740	1.41049	Non-switched memory B cells	B cells
CCTAGCTGTTGGAGGT	pbmc8k	5948	1920	5948	1920	271	13	4.55615	5948	1.4616	Classical monocytes	Monocytes
CTGATCCGTACCCAAT	pbmc8k	5678	1825	5678	1825	246	14	4.33251	5678	1.39525	Classical monocytes	Monocytes
CGGCTAGCATTAGGCT	pbmc8k	5766	1895	5766	1895	215	13	3.72875	5766	1.41687	NA	NA
TTTGCGCGTTCCGTCT	pbmc8k	5089	2024	5089	2024	400	15	7.86009	5089	1.25052	Myeloid dendritic cells	Dendritic cells
CCACGGATCCTTTCGG	pbmc8k	5984	1903	5984	1903	131	14	2.18917	5984	1.47044	Th1/Th17 cells	CD4+ T cells
ACACTGATCCCAAGAT	pbmc8k	4884	1653	4884	1653	144	15	2.9484	4884	1.20014	Naive CD8 T cells	CD8+ T cells
AGTGTCAGTAAGAGAG	pbmc8k	5635	1815	5635	1815	242	13	4.29459	5635	1.38468	Non classical monocytes	Monocytes
CCTAGCTCATGCGCAC	pbmc8k	4938	1684	4938	1684	136	13	2.75415	4938	1.21341	NA	NA
TGAAAGACAGATGGCA	pbmc8k	5110	1867	5110	1867	111	13	2.17221	5110	1.25568	Th17 cells	CD4+ T cells
CGACCTTGTCAACATC	pbmc8k	5344	1529	5344	1529	133	12	2.48877	5344	1.31318	Naive CD8 T cells	CD8+ T cells
TACCTATTCTTCATGT	pbmc8k	4994	1506	4994	1506	126	13	2.52303	4994	1.22717	Naive CD8 T cells	CD8+ T cells
ACGATGTTCCATGAAC	pbmc8k	5690	1825	5690	1825	294	13	5.16696	5690	1.3982	Classical monocytes	Monocytes
TGTCCCAGTGTGACCC	pbmc8k	5056	1568	5056	1568	186	14	3.6788	5056	1.24241	Naive CD4 T cells	CD4+ T cells
GTCATTTAGAAACGAG	pbmc8k	5822	1884	5822	1884	223	13	3.8303	5822	1.43064	Classical monocytes	Monocytes
CGGTTAAGTTTGGGCC	pbmc8k	5944	1929	5944	1929	156	12	2.6245	5944	1.46061	Classical monocytes	Monocytes
GGGACCTTCCCGACTT	pbmc8k	6728	1998	6728	1998	259	13	3.84958	6728	1.65327	Classical monocytes	Monocytes
CGTAGGCGTCAGGACA	pbmc8k	6306	2199	6306	2199	260	14	4.12306	6306	1.54957	Classical monocytes	Monocytes
ATGGGAGTCTTATCTG	pbmc8k	5585	1906	5585	1906	278	13	4.97762	5585	1.3724	NA	NA
ATGCGATCACGTTGGC	pbmc8k	5699	1810	5699	1810	231	13	4.05334	5699	1.40041	Non classical monocytes	Monocytes
GCACTCTGTCCAAGTT	pbmc8k	5727	1894	5727	1894	200	13	3.49223	5727	1.40729	Classical monocytes	Monocytes
CTAAGACAGATATGCA	pbmc8k	5097	1719	5097	1719	80	13	1.56955	5097	1.25248	Th2 cells	CD4+ T cells
CATTATCCATCTACGA	pbmc8k	4339	1675	4339	1675	116	13	2.67343	4339	1.06622	Vd2 gd T cells	NA
GCGCAGTCACTTGGAT	pbmc8k	5305	1723	5305	1723	185	14	3.48728	5305	1.30359	Non-switched memory B cells	B cells
GAGCAGACATAAAGGT	pbmc8k	5182	1655	5182	1655	132	12	2.54728	5182	1.27337	Follicular helper T cells	CD4+ T cells
CAACCAACAAATCCGT	pbmc8k	5894	1541	5894	1541	148	12	2.51103	5894	1.44833	Th17 cells	CD4+ T cells
ATTGGACAGACGCAAC	pbmc8k	5533	1729	5533	1729	414	15	7.48238	5533	1.35962	Classical monocytes	Monocytes
GATGAAATCCCTTGTG	pbmc8k	6204	1831	6204	1831	211	12	3.40103	6204	1.5245	Classical monocytes	Monocytes
ATCATCTAGTCATCCA	pbmc8k	4359	1730	4359	1730	190	13	4.3588	4359	1.07113	Vd2 gd T cells	T cells
CATCCACTCCGAACGC	pbmc8k	5533	1745	5533	1745	123	12	2.22303	5533	1.35962	Naive CD8 T cells	CD8+ T cells
GATGCTAGTTGCTCCT	pbmc8k	5606	1789	5606	1789	173	14	3.08598	5606	1.37756	Th17 cells	CD4+ T cells
ATAGACCCAGCTGTTA	pbmc8k	5338	1418	5338	1418	122	13	2.2855	5338	1.3117	Non-switched memory B cells	B cells
GTTTCTATCGATGAGG	pbmc8k	6144	1936	6144	1936	275	14	4.47591	6144	1.50976	NA	NA
ATCCACCGTCGGCACT	pbmc8k	6112	1935	6112	1935	224	15	3.66492	6112	1.5019	Classical monocytes	Monocytes
GACTACAAGATGGGTC	pbmc8k	5946	1583	5946	1583	161	12	2.7077	5946	1.46111	Naive CD8 T cells	CD8+ T cells
AGTGAGGCACCACGTG	pbmc8k	5655	1624	5655	1624	119	12	2.10433	5655	1.3896	Naive CD4 T cells	CD4+ T cells
TCATTTGGTAAGTAGT	pbmc8k	5288	1658	5288	1658	107	11	2.02345	5288	1.29942	Naive CD8 T cells	CD8+ T cells
AACTCTTTCGTTACAG	pbmc8k	5262	1855	5262	1855	237	13	4.50399	5262	1.29303	Classical monocytes	Monocytes
GGCAATTCAAAGTGCG	pbmc8k	5538	1728	5538	1728	114	12	2.0585	5538	1.36085	Th17 cells	CD4+ T cells
CACAGTATCCCAACGG	pbmc8k	5399	1709	5399	1709	140	14	2.59307	5399	1.32669	MAIT cells	T cells
GCTTCCAAGAGTACCG	pbmc8k	5719	1937	5719	1937	264	14	4.61619	5719	1.40532	Classical monocytes	Monocytes
AACTCAGCAAGAAAGG	pbmc8k	4990	1612	4990	1612	154	12	3.08617	4990	1.22619	Non-switched memory B cells	B cells
TTGGCAATCTTACCTA	pbmc8k	5247	1605	5247	1605	144	13	2.74443	5247	1.28934	Naive CD4 T cells	CD4+ T cells
GAGGTGAGTGGCAAAC	pbmc8k	5922	1767	5922	1767	115	13	1.94191	5922	1.45521	Th17 cells	CD4+ T cells
CCTTACGCACGTCAGC	pbmc8k	5700	1748	5700	1748	114	12	2	5700	1.40066	Th17 cells	CD4+ T cells
CCTTCCCAGGCAATTA	pbmc8k	4278	1554	4278	1554	130	15	3.0388	4278	1.05123	NA	NA
CATGCCTGTCTGGAGA	pbmc8k	6153	1617	6153	1617	108	12	1.75524	6153	1.51197	Th2 cells	CD4+ T cells
GACCAATAGCCTCGTG	pbmc8k	5842	2100	5842	2100	108	13	1.84868	5842	1.43555	Plasmacytoid dendritic cells	Dendritic cells
GACGGCTCATCACGTA	pbmc8k	5342	1763	5342	1763	321	14	6.00899	5342	1.31269	Non classical monocytes	Monocytes
CGAGAAGAGGTACTCT	pbmc8k	5954	1659	5954	1659	174	13	2.92241	5954	1.46307	Non-switched memory B cells	B cells
TGCACCTAGCTTCGCG	pbmc8k	5605	1700	5605	1700	123	13	2.19447	5605	1.37731	Th2 cells	CD4+ T cells
CTCAGAAAGTCTTGCA	pbmc8k	5772	1800	5772	1800	249	14	4.31393	5772	1.41835	Classical monocytes	Monocytes
TAGTGGTCACGCCAGT	pbmc8k	4855	1757	4855	1757	264	12	5.43769	4855	1.19301	NA	Monocytes
AAACCTGTCTCGCTTG	pbmc8k	5559	1768	5559	1768	259	17	4.65911	5559	1.36601	Classical monocytes	Monocytes
AACTCAGGTGAAAGAG	pbmc8k	7143	2029	7143	2029	287	13	4.01792	7143	1.75524	Classical monocytes	Monocytes
ACTTTCATCAATCTCT	pbmc8k	5851	1907	5851	1907	272	13	4.64878	5851	1.43776	Classical monocytes	Monocytes
TCAGGATAGTCCTCCT	pbmc8k	6059	1953	6059	1953	278	14	4.58822	6059	1.48887	Classical monocytes	Monocytes
ACATCAGCACATTTCT	pbmc8k	5229	1619	5229	1619	135	14	2.58176	5229	1.28492	Naive CD4 T cells	CD4+ T cells
CGCCAAGCATTAGGCT	pbmc8k	5655	1624	5655	1624	129	11	2.28117	5655	1.3896	Non-switched memory B cells	B cells
ACTTACTAGAGTAAGG	pbmc8k	5045	1819	5045	1819	226	14	4.47968	5045	1.2397	NA	NA
GTTCATTGTTCTGAAC	pbmc8k	5378	1673	5378	1673	119	12	2.21272	5378	1.32153	Th17 cells	CD4+ T cells
CAAGTTGTCGGCCGAT	pbmc8k	5958	1738	5958	1738	143	14	2.40013	5958	1.46405	Th1/Th17 cells	CD4+ T cells
TCAGATGCACTCAGGC	pbmc8k	5349	1638	5349	1638	105	13	1.96298	5349	1.31441	Non-switched memory B cells	B cells
TCGGGACAGCTCTCGG	pbmc8k	4597	1908	4597	1908	223	13	4.85099	4597	1.12962	MAIT cells	T cells
CAGAGAGAGCTACCTA	pbmc8k	5300	1538	5300	1538	186	13	3.50943	5300	1.30236	Non-switched memory B cells	B cells
ACGAGCCCATCAGTCA	pbmc8k	5873	1562	5873	1562	133	14	2.2646	5873	1.44317	Th17 cells	CD4+ T cells
ACTGCTCGTTCTGTTT	pbmc8k	5943	2212	5943	2212	226	13	3.80279	5943	1.46037	NA	NA
CGAACATTCACATAGC	pbmc8k	5235	1778	5235	1778	299	15	5.71156	5235	1.28639	Classical monocytes	Monocytes
ATTGGTGAGCGAGAAA	pbmc8k	5057	1710	5057	1710	295	12	5.8335	5057	1.24265	Non classical monocytes	Monocytes
ATGAGGGCACTCGACG	pbmc8k	5522	1751	5522	1751	132	12	2.39044	5522	1.35692	Naive B cells	B cells
GCTGCAGCACACATGT	pbmc8k	5898	1658	5898	1658	113	13	1.9159	5898	1.44931	Th1/Th17 cells	CD4+ T cells
CAGAATCGTGATGCCC	pbmc8k	4981	1653	4981	1653	217	14	4.35655	4981	1.22398	Non-switched memory B cells	B cells
CTTAACTCAGTGGGAT	pbmc8k	5126	2025	5126	2025	141	12	2.75068	5126	1.25961	T regulatory cells	CD4+ T cells
TGGCGCAGTATTACCG	pbmc8k	5531	1620	5531	1620	121	11	2.18767	5531	1.35913	Naive CD8 T cells	CD8+ T cells
GACGCGTCAAGGTGTG	pbmc8k	6261	2027	6261	2027	376	14	6.00543	6261	1.53851	Classical monocytes	Monocytes
AAATGCCTCCAGAAGG	pbmc8k	5717	1490	5717	1490	129	12	2.25643	5717	1.40483	Th1/Th17 cells	CD4+ T cells
TGCTGCTAGATGCCTT	pbmc8k	5690	1791	5690	1791	109	14	1.91564	5690	1.3982	Th17 cells	CD4+ T cells
GTCACGGGTCGCTTTC	pbmc8k	5576	1821	5576	1821	98	12	1.75753	5576	1.37019	Th2 cells	CD4+ T cells
TGTCCCAGTAAGTGGC	pbmc8k	5795	1652	5795	1652	161	13	2.77826	5795	1.424	Th1/Th17 cells	CD4+ T cells
ACTGCTCAGAGTACCG	pbmc8k	5939	1842	5939	1842	275	14	4.63041	5939	1.45939	Classical monocytes	Monocytes
TTTGCGCAGCAGGCTA	pbmc8k	5378	1815	5378	1815	234	12	4.35106	5378	1.32153	Intermediate monocytes	Monocytes
CGCTGGATCTTGCATT	pbmc8k	5624	1518	5624	1518	122	13	2.16927	5624	1.38198	Naive CD8 T cells	CD8+ T cells
ATGAGGGAGTAATCCC	pbmc8k	5733	1881	5733	1881	325	15	5.66893	5733	1.40877	Classical monocytes	Monocytes
ATTACTCAGCAAATCA	pbmc8k	4993	1610	4993	1610	150	11	3.00421	4993	1.22693	Naive B cells	B cells
GGTGAAGGTAACGTTC	pbmc8k	5527	1796	5527	1796	203	12	3.67288	5527	1.35814	Classical monocytes	Monocytes
TATCAGGAGAAAGTGG	pbmc8k	6055	1708	6055	1708	113	12	1.86623	6055	1.48789	Th17 cells	CD4+ T cells
CCTTTCTGTCTTTCAT	pbmc8k	5540	1913	5540	1913	202	12	3.64621	5540	1.36134	Classical monocytes	Monocytes
AGAGCGAAGGATGGTC	pbmc8k	5816	1661	5816	1661	183	13	3.14649	5816	1.42916	Intermediate monocytes	Monocytes
ACACTGAAGGGAGTAA	pbmc8k	4991	1521	4991	1521	220	14	4.40793	4991	1.22643	Non-switched memory B cells	B cells
AACTCCCTCTGGGCCA	pbmc8k	4683	1901	4683	1901	74	13	1.58018	4683	1.15075	T regulatory cells	CD4+ T cells
AGACGTTGTCCCTACT	pbmc8k	5629	1772	5629	1772	113	13	2.00746	5629	1.38321	Central memory CD8 T cells	CD8+ T cells
CCAATCCGTTACCGAT	pbmc8k	5207	1802	5207	1802	265	14	5.0893	5207	1.27951	Classical monocytes	Monocytes
GGGTCTGCAGCTATTG	pbmc8k	6215	1563	6215	1563	128	12	2.05953	6215	1.52721	Th17 cells	CD4+ T cells
TCAGGTATCTTGACGA	pbmc8k	5676	1844	5676	1844	309	14	5.44397	5676	1.39476	Classical monocytes	Monocytes
CGCGGTAAGAGTACCG	pbmc8k	4852	1886	4852	1886	168	12	3.46249	4852	1.19228	NA	NA
ACGCAGCGTTAAAGAC	pbmc8k	4399	1675	4399	1675	153	13	3.47806	4399	1.08096	NA	NA
TGGACGCGTGTCCTCT	pbmc8k	5889	2329	5889	2329	194	12	3.29428	5889	1.4471	T regulatory cells	CD8+ T cells
AGCTTGACACCGTTGG	pbmc8k	5567	1701	5567	1701	175	15	3.14352	5567	1.36797	MAIT cells	CD4+ T cells
TTTACTGTCGTGGTCG	pbmc8k	5208	1897	5208	1897	106	13	2.03533	5208	1.27976	Plasmacytoid dendritic cells	Dendritic cells
AAGACCTTCGGTCTAA	pbmc8k	5370	1808	5370	1808	269	14	5.00931	5370	1.31957	Classical monocytes	Monocytes
CACACTCGTCTAGTGT	pbmc8k	4696	1643	4696	1643	113	12	2.4063	4696	1.15394	Non-switched memory B cells	B cells
CCGGGATCATCCGGGT	pbmc8k	5824	1770	5824	1770	119	12	2.04327	5824	1.43113	Th1/Th17 cells	CD4+ T cells
TCTGGAAGTTGGACCC	pbmc8k	6322	1904	6322	1904	259	14	4.0968	6322	1.5535	NA	NA
CTGTGCTGTATGGTTC	pbmc8k	4767	1700	4767	1700	215	15	4.51017	4767	1.17139	Non classical monocytes	Monocytes
TCGGGACCAATGCCAT	pbmc8k	5453	1597	5453	1597	174	15	3.1909	5453	1.33996	Naive B cells	B cells
GTTCTCGCAGCCACCA	pbmc8k	5659	1613	5659	1613	135	13	2.38558	5659	1.39058	Naive CD8 T cells	CD8+ T cells
GGATTACTCACCCGAG	pbmc8k	5521	1669	5521	1669	186	14	3.36895	5521	1.35667	Naive CD8 T cells	CD8+ T cells
TGGTTAGGTAAACCTC	pbmc8k	5136	1743	5136	1743	257	13	5.00389	5136	1.26206	Classical monocytes	Monocytes
AAAGATGCATTGGTAC	pbmc8k	5089	2092	5089	2092	102	13	2.00432	5089	1.25052	T regulatory cells	NA
CAGAATCTCGGCGCAT	pbmc8k	5904	1535	5904	1535	130	12	2.2019	5904	1.45078	Naive CD8 T cells	CD8+ T cells
GACTAACCAATCTGCA	pbmc8k	4383	1600	4383	1600	146	13	3.33105	4383	1.07703	Naive B cells	B cells
TGAGCATCACCGGAAA	pbmc8k	5941	1847	5941	1847	126	13	2.12086	5941	1.45988	Th17 cells	CD4+ T cells
CACAAACCATAAGACA	pbmc8k	4825	1707	4825	1707	166	13	3.44041	4825	1.18564	Naive CD4 T cells	CD8+ T cells
CCTAAAGAGTAATCCC	pbmc8k	4808	1576	4808	1576	130	12	2.70383	4808	1.18147	Naive CD8 T cells	CD8+ T cells
CAGTCCTCAATGGATA	pbmc8k	5157	1566	5157	1566	140	11	2.71476	5157	1.26723	Naive CD8 T cells	NA
CAGATCAAGTGTCCAT	pbmc8k	5379	1556	5379	1556	111	14	2.06358	5379	1.32178	Th17 cells	CD4+ T cells
ATCTGCCGTTACGCGC	pbmc8k	5627	1599	5627	1599	102	12	1.81269	5627	1.38272	Naive CD8 T cells	CD8+ T cells
TCATTACGTAAAGTCA	pbmc8k	4615	1454	4615	1454	140	14	3.03359	4615	1.13404	Non-switched memory B cells	B cells
CGGTTAAAGAGTAAGG	pbmc8k	5179	1604	5179	1604	136	13	2.62599	5179	1.27263	Naive CD8 T cells	CD8+ T cells
ACGCCAGGTACAGCAG	pbmc8k	4982	1873	4982	1873	114	13	2.28824	4982	1.22422	T regulatory cells	CD4+ T cells
AAACCTGGTTTGCATG	pbmc8k	5742	1890	5742	1890	207	14	3.60502	5742	1.41098	Classical monocytes	Monocytes
CCAGCGAAGGGCTTGA	pbmc8k	5899	1671	5899	1671	172	13	2.91575	5899	1.44956	Th17 cells	CD4+ T cells
GACAGAGGTAGCTAAA	pbmc8k	5135	1643	5135	1643	143	12	2.78481	5135	1.26182	Th2 cells	CD4+ T cells
TGTTCCGCACCCATTC	pbmc8k	5818	1859	5818	1859	465	16	7.99244	5818	1.42965	Myeloid dendritic cells	NA
ATCTACTTCGTTTATC	pbmc8k	5380	1785	5380	1785	286	13	5.31599	5380	1.32202	Classical monocytes	Monocytes
TTGAACGTCGCATGAT	pbmc8k	5687	1924	5687	1924	289	13	5.08177	5687	1.39746	Classical monocytes	Monocytes
ACCCACTTCAATCACG	pbmc8k	5132	1709	5132	1709	185	15	3.60483	5132	1.26108	MAIT cells	T cells
TACTCATGTCATGCAT	pbmc8k	5025	1939	5025	1939	95	12	1.89055	5025	1.23479	Non-Vd2 gd T cells	T cells
GAACCTATCGGAGGTA	pbmc8k	5837	1736	5837	1736	125	13	2.14151	5837	1.43432	Th17 cells	CD4+ T cells
GCATGTAAGATTACCC	pbmc8k	4469	1804	4469	1804	79	12	1.76773	4469	1.09816	T regulatory cells	CD4+ T cells
TGCGGGTAGTTGTCGT	pbmc8k	6160	1724	6160	1724	135	12	2.19156	6160	1.51369	Th17 cells	CD4+ T cells
CTAGTGAAGTGTCCAT	pbmc8k	5675	1837	5675	1837	190	13	3.34802	5675	1.39451	Classical monocytes	Monocytes
CCCAATCTCAGTGTTG	pbmc8k	6046	1520	6046	1520	170	12	2.81178	6046	1.48568	MAIT cells	CD4+ T cells
TGGGCGTTCCGTCATC	pbmc8k	6470	2001	6470	2001	337	14	5.20866	6470	1.58987	Classical monocytes	Monocytes
AGCGTCGAGATGTAAC	pbmc8k	8801	2359	8801	2359	335	14	3.80639	8801	2.16266	Myeloid dendritic cells	Dendritic cells
CAGAATCTCTTCGGTC	pbmc8k	5246	1705	5246	1705	240	13	4.57491	5246	1.2891	Intermediate monocytes	Monocytes
GAACATCGTAGCGATG	pbmc8k	5178	1535	5178	1535	226	14	4.36462	5178	1.27239	Non-switched memory B cells	B cells
GATCAGTCAGCGATCC	pbmc8k	5343	1604	5343	1604	173	13	3.23788	5343	1.31293	Naive CD8 T cells	CD8+ T cells
GATCGTACAAGCTGAG	pbmc8k	4335	1904	4335	1904	134	12	3.09112	4335	1.06524	Natural killer cells	NK cells
ACATACGAGAGGTTGC	pbmc8k	4950	1666	4950	1666	176	16	3.55556	4950	1.21636	Non-switched memory B cells	B cells
AGCCTAAGTCTAAAGA	pbmc8k	5963	1775	5963	1775	230	14	3.85712	5963	1.46528	Classical monocytes	Monocytes
GGACATTTCTAACCGA	pbmc8k	4977	1652	4977	1652	100	13	2.00924	4977	1.22299	Naive CD8 T cells	CD8+ T cells
GTCATTTGTCCAGTTA	pbmc8k	5396	1813	5396	1813	128	13	2.37213	5396	1.32595	Th1/Th17 cells	CD4+ T cells
GAGGTGACAGTTTACG	pbmc8k	5972	1875	5972	1875	222	14	3.71735	5972	1.46749	Classical monocytes	Monocytes
CCCATACTCTGAAAGA	pbmc8k	5242	1469	5242	1469	134	14	2.55628	5242	1.28811	Naive CD8 T cells	CD8+ T cells
CACCTTGGTATGGTTC	pbmc8k	5177	1660	5177	1660	137	13	2.64632	5177	1.27214	Non-switched memory B cells	B cells
TGCTACCGTGCAGGTA	pbmc8k	5715	1878	5715	1878	101	13	1.76728	5715	1.40434	T regulatory cells	CD4+ T cells
TAGGCATAGGTGCACA	pbmc8k	4921	1994	4921	1994	219	13	4.45031	4921	1.20923	NA	NA
AACTGGTAGAGTACAT	pbmc8k	6087	1941	6087	1941	273	14	4.48497	6087	1.49575	Classical monocytes	Monocytes
TAGGCATCACATCCAA	pbmc8k	4974	1713	4974	1713	95	12	1.90993	4974	1.22226	Th17 cells	CD4+ T cells
GGCAATTAGTAATCCC	pbmc8k	5670	1936	5670	1936	199	13	3.5097	5670	1.39328	Classical monocytes	Monocytes
AAGGTTCCAAAGGAAG	pbmc8k	4822	1708	4822	1708	84	11	1.74202	4822	1.18491	Central memory CD8 T cells	T cells
GCTGCTTCACCGTTGG	pbmc8k	5363	2045	5363	2045	71	13	1.32389	5363	1.31785	Plasmacytoid dendritic cells	Dendritic cells
ACGGCCACACACAGAG	pbmc8k	5648	1560	5648	1560	204	13	3.6119	5648	1.38788	Naive CD8 T cells	CD8+ T cells
GTCTTCGAGTTTCCTT	pbmc8k	5324	1717	5324	1717	101	13	1.89707	5324	1.30826	Naive CD8 T cells	CD8+ T cells
CCGTGGACATCCTTGC	pbmc8k	4943	1794	4943	1794	244	12	4.93627	4943	1.21464	Classical monocytes	Monocytes
ACACCCTGTAACGTTC	pbmc8k	5529	1566	5529	1566	132	13	2.38741	5529	1.35864	Th17 cells	CD4+ T cells
CGGACTGCAACTGGCC	pbmc8k	5544	1703	5544	1703	142	13	2.56133	5544	1.36232	Th1/Th17 cells	CD4+ T cells
TTCGGTCTCAACCAAC	pbmc8k	5583	1828	5583	1828	236	15	4.22712	5583	1.37191	NA	NA
GAGTCCGTCCGATATG	pbmc8k	5653	1823	5653	1823	334	13	5.90837	5653	1.38911	Intermediate monocytes	Monocytes
GATCGCGAGCGGCTTC	pbmc8k	5848	1960	5848	1960	215	14	3.67647	5848	1.43702	NA	NA
GCTGGGTAGCGATTCT	pbmc8k	5727	1855	5727	1855	444	14	7.75275	5727	1.40729	Classical monocytes	Monocytes
AGTGAGGAGCATGGCA	pbmc8k	5901	1862	5901	1862	207	13	3.50788	5901	1.45005	Classical monocytes	Monocytes
AAAGATGAGTGCAAGC	pbmc8k	6076	1896	6076	1896	225	16	3.70309	6076	1.49305	Intermediate monocytes	Monocytes
CATATGGTCTTGTCAT	pbmc8k	3512	1782	3512	1782	78	13	2.22096	3512	0.863001	T regulatory cells	CD4+ T cells
TCATTACAGTTACGGG	pbmc8k	4801	1691	4801	1691	212	13	4.41575	4801	1.17975	Non classical monocytes	Monocytes
TGTATTCGTAGCCTAT	pbmc8k	4445	1582	4445	1582	123	14	2.76715	4445	1.09227	Th2 cells	CD4+ T cells
ATCTGCCCAAACAACA	pbmc8k	5424	1537	5424	1537	144	15	2.65487	5424	1.33283	Naive CD8 T cells	CD8+ T cells
CGCTATCAGCGATATA	pbmc8k	5195	1719	5195	1719	199	14	3.83061	5195	1.27656	Non classical monocytes	Monocytes
TGCCCTATCCAAGCCG	pbmc8k	5002	1597	5002	1597	109	13	2.17913	5002	1.22914	Th2 cells	CD4+ T cells
GCGCGATTCGCAAACT	pbmc8k	5258	1665	5258	1665	118	13	2.2442	5258	1.29204	Naive CD4 T cells	CD4+ T cells
TTCCCAGGTCCAACTA	pbmc8k	5795	1817	5795	1817	219	13	3.77912	5795	1.424	Classical monocytes	Monocytes
AGAGCTTTCCTTTACA	pbmc8k	5020	1816	5020	1816	105	12	2.09163	5020	1.23356	Naive CD8 T cells	CD8+ T cells
GTACTCCTCAGGATCT	pbmc8k	5409	1638	5409	1638	152	13	2.81013	5409	1.32915	Th17 cells	CD4+ T cells
ACACCAAGTACATGTC	pbmc8k	4646	1456	4646	1456	108	13	2.32458	4646	1.14166	Th2 cells	CD4+ T cells
ACACTGAGTTAGGGTG	pbmc8k	4482	1977	4482	1977	115	12	2.56582	4482	1.10136	T regulatory cells	CD8+ T cells
ACTGAGTGTCAAACTC	pbmc8k	5778	1784	5778	1784	159	11	2.75182	5778	1.41982	Th17 cells	CD4+ T cells
CAAGGCCAGGTAGCCA	pbmc8k	5945	1523	5945	1523	131	13	2.20353	5945	1.46086	Th1/Th17 cells	CD4+ T cells
CCTACCAAGCTGGAAC	pbmc8k	4974	1507	4974	1507	196	13	3.94049	4974	1.22226	Naive CD8 T cells	CD8+ T cells
AAGGAGCTCCAAGTAC	pbmc8k	5149	1682	5149	1682	120	13	2.33055	5149	1.26526	Th1/Th17 cells	CD4+ T cells
GCAATCAAGATCCCAT	pbmc8k	5107	1608	5107	1608	207	15	4.05326	5107	1.25494	Th17 cells	CD4+ T cells
CTGCCTAAGCGGATCA	pbmc8k	5890	1697	5890	1697	123	13	2.08829	5890	1.44734	Th17 cells	CD4+ T cells
ATAGACCGTATGAAAC	pbmc8k	4793	1595	4793	1595	88	14	1.83601	4793	1.17778	Th1/Th17 cells	CD4+ T cells
CACATTTGTCACCTAA	pbmc8k	4805	1597	4805	1597	128	12	2.66389	4805	1.18073	Naive CD8 T cells	CD8+ T cells
CGAATGTTCCGAGCCA	pbmc8k	4957	1587	4957	1587	253	13	5.10389	4957	1.21808	Non-switched memory B cells	B cells
CCTTTCTGTGCGATAG	pbmc8k	5802	1951	5802	1951	231	13	3.98139	5802	1.42572	Classical monocytes	Monocytes
CACCAGGCAGTCCTTC	pbmc8k	4637	1722	4637	1722	211	14	4.55036	4637	1.13945	Intermediate monocytes	Monocytes
CCTACACCAGCTCCGA	pbmc8k	4761	1602	4761	1602	93	13	1.95337	4761	1.16992	Naive CD8 T cells	CD8+ T cells
GATCTAGCATTGGCGC	pbmc8k	5389	1622	5389	1622	155	12	2.87623	5389	1.32423	Naive B cells	B cells
ATCATCTTCACAATGC	pbmc8k	4759	1568	4759	1568	128	12	2.68964	4759	1.16942	Naive CD8 T cells	CD8+ T cells
TCCCGATGTTTAGGAA	pbmc8k	4834	1391	4834	1391	190	13	3.93049	4834	1.18785	Th1/Th17 cells	CD4+ T cells
CTAGCCTTCCTTCAAT	pbmc8k	5367	1878	5367	1878	203	13	3.78237	5367	1.31883	Classical monocytes	Monocytes
CCCATACGTAGGACAC	pbmc8k	6605	1936	6605	1936	228	12	3.45193	6605	1.62304	Classical monocytes	Monocytes
CAACCTCGTTCGGCAC	pbmc8k	5318	1649	5318	1649	207	14	3.89244	5318	1.30679	Naive CD8 T cells	CD8+ T cells
AGCTCCTAGGTGACCA	pbmc8k	5132	1584	5132	1584	149	12	2.90335	5132	1.26108	Non-switched memory B cells	B cells
AAGCCGCCACATGTGT	pbmc8k	5592	1689	5592	1689	115	14	2.05651	5592	1.37412	Naive B cells	B cells
AGATTGCAGGATTCGG	pbmc8k	4680	1935	4680	1935	85	11	1.81624	4680	1.15001	Non-Vd2 gd T cells	T cells
TGCTGCTGTAGCGTCC	pbmc8k	5653	1963	5653	1963	241	15	4.26322	5653	1.38911	Myeloid dendritic cells	Dendritic cells
GTTTCTAAGTCCTCCT	pbmc8k	5253	1608	5253	1608	98	12	1.8656	5253	1.29082	Th1/Th17 cells	CD4+ T cells
ACACCGGAGTATCGAA	pbmc8k	5332	1665	5332	1665	109	13	2.04426	5332	1.31023	Th2 cells	CD4+ T cells
GAGTCCGGTTTGTGTG	pbmc8k	5859	1662	5859	1662	155	13	2.6455	5859	1.43973	Th17 cells	CD4+ T cells
CGTTAGACAGGCAGTA	pbmc8k	5566	1758	5566	1758	306	15	5.49766	5566	1.36773	Classical monocytes	Monocytes
ATTGGTGCACAACGTT	pbmc8k	5653	1610	5653	1610	155	14	2.74191	5653	1.38911	MAIT cells	T cells
TACTCATCATATACGC	pbmc8k	4899	1558	4899	1558	139	11	2.83731	4899	1.20383	Exhausted B cells	B cells
ACTTTCACATCACAAC	pbmc8k	4370	1570	4370	1570	112	13	2.56293	4370	1.07384	NA	NA
GGACGTCGTGATAAGT	pbmc8k	5643	1930	5643	1930	200	14	3.54421	5643	1.38665	Natural killer cells	NA
CGGACGTCATGAAGTA	pbmc8k	5373	1836	5373	1836	93	13	1.73088	5373	1.3203	NA	CD4+ T cells
CTGCCTACAACACCTA	pbmc8k	4626	1769	4626	1769	155	13	3.35063	4626	1.13674	Natural killer cells	NK cells
CCTTCCCGTACACCGC	pbmc8k	5048	1657	5048	1657	159	13	3.14976	5048	1.24044	Classical monocytes	Monocytes
ACATACGCAGTATAAG	pbmc8k	4308	1558	4308	1558	102	12	2.36769	4308	1.0586	Naive B cells	B cells
ATCATCTAGACAATAC	pbmc8k	4525	1589	4525	1589	93	12	2.05525	4525	1.11192	Th2 cells	CD4+ T cells
ACTGATGCAACTGGCC	pbmc8k	5121	1555	5121	1555	234	13	4.56942	5121	1.25838	Exhausted B cells	B cells
TGAGCATCAGGCTGAA	pbmc8k	5924	1639	5924	1639	143	12	2.41391	5924	1.4557	MAIT cells	T cells
CCACCTAGTTAAGGGC	pbmc8k	5034	1673	5034	1673	126	12	2.50298	5034	1.237	Th17 cells	CD4+ T cells
TATTACCTCACTTCAT	pbmc8k	4741	1654	4741	1654	130	13	2.74204	4741	1.165	Naive CD8 T cells	CD8+ T cells
ACTTGTTCATTGGTAC	pbmc8k	4728	1749	4728	1749	100	13	2.11506	4728	1.16181	Central memory CD8 T cells	CD8+ T cells
CGAGCCAGTCCATCCT	pbmc8k	5806	1803	5806	1803	307	14	5.28763	5806	1.4267	Classical monocytes	Monocytes
AAGGCAGGTATGAAAC	pbmc8k	5040	1473	5040	1473	121	12	2.40079	5040	1.23847	Naive CD4 T cells	CD4+ T cells
CTACATTCAAGACGTG	pbmc8k	5227	1893	5227	1893	275	13	5.26114	5227	1.28443	NA	NA
CTCTAATCATCGGAAG	pbmc8k	4300	1626	4300	1626	122	12	2.83721	4300	1.05664	Naive B cells	B cells
GGGACCTTCGATCCCT	pbmc8k	5670	1850	5670	1850	163	13	2.87478	5670	1.39328	T regulatory cells	CD4+ T cells
AAGGCAGAGACAAGCC	pbmc8k	5605	1770	5605	1770	257	14	4.58519	5605	1.37731	Classical monocytes	Monocytes
CTACCCAAGAGCTTCT	pbmc8k	5853	1547	5853	1547	167	13	2.85324	5853	1.43825	Th17 cells	CD4+ T cells
GGGCATCGTTCAGGCC	pbmc8k	5552	1557	5552	1557	196	13	3.53026	5552	1.36429	Non-switched memory B cells	B cells
GGATGTTGTATCACCA	pbmc8k	5234	1622	5234	1622	79	12	1.50936	5234	1.28615	Th2 cells	CD4+ T cells
TCTGGAACATAAGACA	pbmc8k	5090	1854	5090	1854	245	14	4.81336	5090	1.25076	Classical monocytes	Monocytes
CCACCTACAATGGTCT	pbmc8k	4495	1759	4495	1759	234	12	5.20578	4495	1.10455	Non classical monocytes	Monocytes
GATGCTACAGAGCCAA	pbmc8k	5176	1672	5176	1672	157	14	3.03323	5176	1.27189	Naive CD8 T cells	CD8+ T cells
GGACATTTCACCATAG	pbmc8k	5516	1733	5516	1733	311	13	5.63814	5516	1.35544	NA	NA
TCGTACCGTTTCCACC	pbmc8k	5686	1837	5686	1837	121	11	2.12803	5686	1.39722	Th1/Th17 cells	CD4+ T cells
TCCACACAGCTAGTTC	pbmc8k	5416	1732	5416	1732	326	14	6.0192	5416	1.33087	Classical monocytes	Monocytes
AGGGTGACAAGAGTCG	pbmc8k	5418	1827	5418	1827	253	13	4.66962	5418	1.33136	Classical monocytes	Monocytes
GTACTCCTCCTAGAAC	pbmc8k	4673	1609	4673	1609	145	13	3.10293	4673	1.14829	Naive CD8 T cells	CD8+ T cells
ACGTCAAGTTAAGAAC	pbmc8k	4618	1570	4618	1570	150	14	3.24816	4618	1.13478	Naive CD8 T cells	CD8+ T cells
ACGATACCAACTGGCC	pbmc8k	4094	1568	4094	1568	89	13	2.17391	4094	1.00602	Non classical monocytes	Monocytes
ATCTACTAGCTACCGC	pbmc8k	5096	1591	5096	1591	127	12	2.49215	5096	1.25224	Naive CD8 T cells	CD8+ T cells
AGACGTTAGGCTAGAC	pbmc8k	5826	1834	5826	1834	330	13	5.66426	5826	1.43162	Classical monocytes	Monocytes
TTTCCTCTCCACGTGG	pbmc8k	5614	1583	5614	1583	156	12	2.77877	5614	1.37952	Th17 cells	CD4+ T cells
CCAATCCGTGATGTGG	pbmc8k	5057	1899	5057	1899	100	13	1.97746	5057	1.24265	Th17 cells	CD4+ T cells
TCACAAGCAATTCCTT	pbmc8k	5682	1784	5682	1784	298	15	5.24463	5682	1.39623	Classical monocytes	Monocytes
GAACCTATCAACTCTT	pbmc8k	4638	1567	4638	1567	169	14	3.64381	4638	1.13969	Th17 cells	CD4+ T cells
GAAATGACATCACGTA	pbmc8k	4703	1538	4703	1538	193	13	4.10376	4703	1.15566	Th2 cells	CD4+ T cells
TTCGAAGTCCTCCTAG	pbmc8k	4449	1630	4449	1630	141	12	3.16925	4449	1.09325	Non-switched memory B cells	B cells
TACCTTAGTACGACCC	pbmc8k	4640	1819	4640	1819	204	12	4.39655	4640	1.14018	NA	B cells
AGGCCACGTTCGCGAC	pbmc8k	5510	1780	5510	1780	248	12	4.50091	5510	1.35397	Non classical monocytes	Monocytes
GGACGTCCAGCGAACA	pbmc8k	5050	1439	5050	1439	154	13	3.0495	5050	1.24093	Non-switched memory B cells	B cells
GACGTTATCTTCATGT	pbmc8k	5003	1582	5003	1582	153	13	3.05817	5003	1.22938	Naive CD8 T cells	NA
GACAGAGCAATGGTCT	pbmc8k	5737	1931	5737	1931	192	16	3.3467	5737	1.40975	Classical monocytes	Monocytes
CTAATGGGTACCGGCT	pbmc8k	5328	1658	5328	1658	127	13	2.38363	5328	1.30924	Naive CD8 T cells	CD8+ T cells
ATCCGAACACAAGTAA	pbmc8k	4208	1590	4208	1590	134	14	3.18441	4208	1.03403	Non-switched memory B cells	B cells
ATGTGTGGTGCTCTTC	pbmc8k	5466	1822	5466	1822	217	14	3.97	5466	1.34316	Intermediate monocytes	Monocytes
AGCTTGACACCATCCT	pbmc8k	4810	1593	4810	1593	181	14	3.76299	4810	1.18196	Naive CD8 T cells	CD8+ T cells
AACCATGGTCTAAAGA	pbmc8k	4415	1508	4415	1508	81	11	1.83465	4415	1.08489	Th2 cells	CD4+ T cells
TAAACCGTCAGAGGTG	pbmc8k	5508	1616	5508	1616	159	13	2.88671	5508	1.35348	Th1/Th17 cells	CD4+ T cells
GGAACTTCATTTGCTT	pbmc8k	4753	1493	4753	1493	93	13	1.95666	4753	1.16795	Naive CD8 T cells	CD8+ T cells
CAACTAGCACAGACTT	pbmc8k	4751	1648	4751	1648	121	12	2.54683	4751	1.16746	Th2 cells	CD4+ T cells
CCACCTAAGTTAGGTA	pbmc8k	4926	1526	4926	1526	137	15	2.78116	4926	1.21046	Naive CD8 T cells	CD8+ T cells
TAGTGGTGTCCAACTA	pbmc8k	5230	1546	5230	1546	125	14	2.39006	5230	1.28516	Th17 cells	CD4+ T cells
CCTAGCTTCAAACCGT	pbmc8k	4846	1545	4846	1545	148	12	3.05407	4846	1.1908	Naive CD8 T cells	CD8+ T cells
TCTTTCCTCGACGGAA	pbmc8k	5325	1551	5325	1551	155	13	2.9108	5325	1.30851	Naive CD8 T cells	CD8+ T cells
TCTCATACAGAAGCAC	pbmc8k	4494	1756	4494	1756	62	11	1.37962	4494	1.10431	Th17 cells	CD4+ T cells
GGGACCTGTCTCCATC	pbmc8k	4854	1585	4854	1585	211	15	4.34693	4854	1.19277	Non-switched memory B cells	B cells
CTAGAGTGTCATGCAT	pbmc8k	4571	1705	4571	1705	179	12	3.91599	4571	1.12323	Exhausted B cells	B cells
CACATTTTCTTGCAAG	pbmc8k	4937	1707	4937	1707	96	13	1.9445	4937	1.21316	Th1/Th17 cells	CD4+ T cells
TCGCGTTGTCTCAACA	pbmc8k	5763	1731	5763	1731	254	12	4.40743	5763	1.41614	Classical monocytes	Monocytes
AACTCCCGTGGTCTCG	pbmc8k	5987	1909	5987	1909	258	13	4.30934	5987	1.47118	Classical monocytes	Monocytes
TACGGATGTTCTGAAC	pbmc8k	4895	1549	4895	1549	135	12	2.75792	4895	1.20284	Naive CD8 T cells	CD8+ T cells
AGCCTAATCATGCTCC	pbmc8k	4741	1670	4741	1670	109	13	2.29909	4741	1.165	Naive CD8 T cells	CD8+ T cells
TACTCGCGTGTAAGTA	pbmc8k	5646	1784	5646	1784	327	13	5.79171	5646	1.38739	Classical monocytes	Monocytes
CGTAGGCTCGTTACGA	pbmc8k	6128	1834	6128	1834	173	14	2.82311	6128	1.50583	Th2 cells	CD4+ T cells
TCTCATACATTGAGCT	pbmc8k	5198	1723	5198	1723	160	14	3.07811	5198	1.2773	Vd2 gd T cells	T cells
TGCCCTACAAATCCGT	pbmc8k	4705	1562	4705	1562	164	13	3.48565	4705	1.15616	Non-switched memory B cells	B cells
ACGATACAGCTACCTA	pbmc8k	4721	1689	4721	1689	232	14	4.91421	4721	1.16009	Classical monocytes	Monocytes
TTAGGACCAACTTGAC	pbmc8k	5154	1675	5154	1675	92	13	1.78502	5154	1.26649	Th1/Th17 cells	CD4+ T cells
TCAATCTAGAAGAAGC	pbmc8k	5992	1807	5992	1807	253	14	4.2223	5992	1.47241	Classical monocytes	Monocytes
CAACCTCTCCAGAAGG	pbmc8k	4896	1802	4896	1802	283	14	5.78023	4896	1.20309	NA	NA
CTCATTACAGCTCGCA	pbmc8k	5849	1848	5849	1848	308	13	5.26586	5849	1.43727	Classical monocytes	Monocytes
TCGGTAACATGATCCA	pbmc8k	5314	1707	5314	1707	126	12	2.3711	5314	1.3058	Th2 cells	CD4+ T cells
GGGACCTGTTCCTCCA	pbmc8k	5259	1698	5259	1698	119	14	2.26279	5259	1.29229	Th2 cells	CD4+ T cells
CGCGGTACAAGCCATT	pbmc8k	5144	1581	5144	1581	87	12	1.69129	5144	1.26403	Naive CD8 T cells	CD8+ T cells
GACGTTAAGAATCTCC	pbmc8k	5254	1702	5254	1702	261	15	4.96764	5254	1.29106	Classical monocytes	Monocytes
AACGTTGGTCAAAGCG	pbmc8k	5124	1558	5124	1558	189	14	3.68852	5124	1.25912	Exhausted B cells	B cells
GAATAAGTCACAAACC	pbmc8k	4832	1469	4832	1469	137	13	2.83526	4832	1.18736	Naive CD8 T cells	CD8+ T cells
GTTTCTAAGGAGTCTG	pbmc8k	5699	1838	5699	1838	287	12	5.03597	5699	1.40041	Classical monocytes	Monocytes
GAATAAGAGCTATGCT	pbmc8k	5683	1807	5683	1807	313	13	5.50765	5683	1.39648	Classical monocytes	Monocytes
CTCAGAACAGCGTAAG	pbmc8k	5884	1825	5884	1825	326	13	5.54045	5884	1.44587	Classical monocytes	Monocytes
GCTTCCAGTGACAAAT	pbmc8k	4789	1549	4789	1549	133	12	2.7772	4789	1.1768	Naive B cells	B cells
ACAGCCGAGTGGGCTA	pbmc8k	5345	1698	5345	1698	142	13	2.65669	5345	1.31342	MAIT cells	T cells
GATGAAAGTGTCTGAT	pbmc8k	5713	1837	5713	1837	192	14	3.36076	5713	1.40385	Classical monocytes	Monocytes
TGGACGCAGGTGATTA	pbmc8k	5329	1572	5329	1572	158	13	2.96491	5329	1.30949	Naive CD4 T cells	CD4+ T cells
TTCGGTCTCGCGATCG	pbmc8k	4860	1619	4860	1619	131	12	2.69547	4860	1.19424	NA	NA
TCAGCAAAGTGGGCTA	pbmc8k	5509	1730	5509	1730	212	13	3.84825	5509	1.35372	Intermediate monocytes	Monocytes
GTCACAAAGGGTCTCC	pbmc8k	6006	1899	6006	1899	280	15	4.662	6006	1.47585	Classical monocytes	Monocytes
CTCATTAAGTTCGATC	pbmc8k	5001	1552	5001	1552	112	13	2.23955	5001	1.22889	Naive CD4 T cells	CD4+ T cells
CCGGGATCAGCGTCCA	pbmc8k	5882	1607	5882	1607	146	12	2.48215	5882	1.44538	Naive CD4 T cells	CD8+ T cells
GGAATAACACTCAGGC	pbmc8k	4766	1469	4766	1469	98	12	2.05623	4766	1.17115	Non-switched memory B cells	B cells
TGCTACCAGCACCGTC	pbmc8k	4689	1654	4689	1654	197	13	4.20132	4689	1.15222	Non classical monocytes	Monocytes
CAGCATACACATTAGC	pbmc8k	4545	1457	4545	1457	150	12	3.30033	4545	1.11684	Naive CD8 T cells	CD8+ T cells
CACACTCAGCCATCGC	pbmc8k	5318	1539	5318	1539	147	11	2.7642	5318	1.30679	Th17 cells	CD4+ T cells
CACACCTGTCTGATCA	pbmc8k	4986	1784	4986	1784	162	13	3.2491	4986	1.22521	Classical monocytes	Monocytes
ACTGTCCAGCGTTGCC	pbmc8k	5283	1829	5283	1829	236	15	4.46716	5283	1.29819	Classical monocytes	Monocytes
CACCACTAGTGCGATG	pbmc8k	5561	1519	5561	1519	117	14	2.10394	5561	1.3665	Th1/Th17 cells	CD4+ T cells
ACACCCTAGGATGCGT	pbmc8k	5178	1568	5178	1568	105	13	2.02781	5178	1.27239	Naive CD4 T cells	CD4+ T cells
CTAGAGTAGACGCACA	pbmc8k	5146	1579	5146	1579	82	12	1.59347	5146	1.26452	Th17 cells	CD4+ T cells
GACTAACGTCCCGACA	pbmc8k	5381	1709	5381	1709	131	14	2.43449	5381	1.32227	Th17 cells	CD4+ T cells
TGGTTAGTCAAAGACA	pbmc8k	4616	1560	4616	1560	89	13	1.92808	4616	1.13429	Naive CD4 T cells	CD8+ T cells
GACCTGGCATCCTTGC	pbmc8k	5076	1645	5076	1645	83	12	1.63515	5076	1.24732	T regulatory cells	CD4+ T cells
CTCGTACGTCCGAACC	pbmc8k	4815	1636	4815	1636	130	12	2.6999	4815	1.18319	Non-switched memory B cells	B cells
CTAGAGTGTGTTGGGA	pbmc8k	5268	1784	5268	1784	103	14	1.9552	5268	1.2945	Th2 cells	CD4+ T cells
CATGACAGTTCCACAA	pbmc8k	5096	1709	5096	1709	174	12	3.41444	5096	1.25224	Classical monocytes	Monocytes
GACGTGCTCGTTTGCC	pbmc8k	5280	1749	5280	1749	245	14	4.64015	5280	1.29745	Classical monocytes	Monocytes
CCACTACCATTTCAGG	pbmc8k	4617	1711	4617	1711	156	13	3.37882	4617	1.13453	Th17 cells	CD4+ T cells
ACATACGTCTCATTCA	pbmc8k	4982	1577	4982	1577	137	13	2.7499	4982	1.22422	NA	NA
CCACGGAGTCGCTTTC	pbmc8k	5338	1800	5338	1800	212	12	3.97152	5338	1.3117	NA	NA
CTCGTCACAATGTTGC	pbmc8k	5906	1958	5906	1958	188	13	3.1832	5906	1.45128	Classical monocytes	Monocytes
CGATTGAGTCTGCAAT	pbmc8k	5404	1752	5404	1752	213	13	3.94152	5404	1.32792	Classical monocytes	Monocytes
CTCACACTCTGGTTCC	pbmc8k	4997	1691	4997	1691	195	13	3.90234	4997	1.22791	Non classical monocytes	Monocytes
GTACTTTGTCTGGTCG	pbmc8k	5545	1709	5545	1709	241	15	4.34626	5545	1.36257	Classical monocytes	Monocytes
TTTGTCATCGTCTGAA	pbmc8k	5384	1788	5384	1788	199	14	3.69614	5384	1.32301	Classical monocytes	Monocytes
CACTCCAAGATGCGAC	pbmc8k	5265	1610	5265	1610	124	13	2.35518	5265	1.29376	Naive CD4 T cells	CD4+ T cells
TTTACTGTCAGTCCCT	pbmc8k	4793	1499	4793	1499	192	12	4.00584	4793	1.17778	Non-switched memory B cells	B cells
CCAGCGACAAGCGCTC	pbmc8k	4638	2020	4638	2020	171	14	3.68693	4638	1.13969	Natural killer cells	NK cells
TATCTCAAGCAGCCTC	pbmc8k	4956	1696	4956	1696	156	13	3.1477	4956	1.21783	Central memory CD8 T cells	T cells
GTTCATTAGCTGATAA	pbmc8k	5099	1600	5099	1600	105	13	2.05923	5099	1.25297	Naive CD8 T cells	CD8+ T cells
GGACAAGAGCATGGCA	pbmc8k	4764	1656	4764	1656	288	14	6.04534	4764	1.17065	Myeloid dendritic cells	Dendritic cells
AGCAGCCTCACCATAG	pbmc8k	4352	1498	4352	1498	206	13	4.73346	4352	1.06941	Naive B cells	B cells
TCTCTAACAGTAGAGC	pbmc8k	5452	1869	5452	1869	383	13	7.02494	5452	1.33972	Myeloid dendritic cells	Monocytes
AGAATAGAGTCTTGCA	pbmc8k	5219	1444	5219	1444	96	13	1.83943	5219	1.28246	Th17 cells	CD4+ T cells
CATCAAGGTGAACCTT	pbmc8k	4920	1494	4920	1494	132	14	2.68293	4920	1.20899	Naive CD8 T cells	CD8+ T cells
TGCCCATAGGGAAACA	pbmc8k	5654	1843	5654	1843	266	15	4.70463	5654	1.38935	Classical monocytes	Monocytes
CAACTAGAGAGCAATT	pbmc8k	5307	1693	5307	1693	173	14	3.25985	5307	1.30408	Classical monocytes	Monocytes
GATTCAGTCCCAAGTA	pbmc8k	5475	1666	5475	1666	191	14	3.48858	5475	1.34537	Progenitor cells	Progenitors
ATCATCTGTGCACCAC	pbmc8k	5219	1674	5219	1674	136	13	2.60586	5219	1.28246	Th2 cells	CD4+ T cells
GCATGCGAGCTCAACT	pbmc8k	5454	1632	5454	1632	118	12	2.16355	5454	1.34021	Th2 cells	CD4+ T cells
TCTATTGCACAACGCC	pbmc8k	5203	1877	5203	1877	195	14	3.74784	5203	1.27853	Classical monocytes	Monocytes
ATCATCTTCTGAAAGA	pbmc8k	4588	1464	4588	1464	180	12	3.92328	4588	1.12741	Naive CD8 T cells	CD8+ T cells
ATCACGAGTCTTCAAG	pbmc8k	5787	1829	5787	1829	229	14	3.95715	5787	1.42203	Classical monocytes	Monocytes
GGGAATGCAAGCTGTT	pbmc8k	6238	1958	6238	1958	174	13	2.78936	6238	1.53286	Classical monocytes	Monocytes
AGATTGCTCAGGTAAA	pbmc8k	4766	1553	4766	1553	141	13	2.95846	4766	1.17115	Naive CD8 T cells	CD8+ T cells
ACATCAGCATTTGCTT	pbmc8k	4824	1447	4824	1447	137	12	2.83997	4824	1.1854	Naive CD8 T cells	CD8+ T cells
TTCCCAGGTGAAATCA	pbmc8k	5004	1561	5004	1561	132	12	2.63789	5004	1.22963	Naive CD8 T cells	CD8+ T cells
CTGATAGTCCGTCAAA	pbmc8k	5150	1604	5150	1604	102	12	1.98058	5150	1.26551	Naive CD8 T cells	CD8+ T cells
CACAGTACACATAACC	pbmc8k	4387	1431	4387	1431	96	12	2.18828	4387	1.07801	Naive CD8 T cells	CD8+ T cells
CAGGTGCAGTGTTTGC	pbmc8k	5353	1782	5353	1782	145	14	2.70876	5353	1.31539	Th17 cells	CD4+ T cells
TCGCGAGAGTGTACCT	pbmc8k	5710	1659	5710	1659	121	12	2.11909	5710	1.40311	Naive CD8 T cells	CD8+ T cells
AACTCCCGTTCATGGT	pbmc8k	4969	1579	4969	1579	149	14	2.99859	4969	1.22103	Naive CD8 T cells	CD8+ T cells
GAAACTCCAGATCTGT	pbmc8k	5414	1723	5414	1723	121	12	2.23495	5414	1.33038	Naive CD8 T cells	CD8+ T cells
GTCTTCGAGGTACTCT	pbmc8k	5258	1696	5258	1696	105	12	1.99696	5258	1.29204	Th1/Th17 cells	CD4+ T cells
CTGCTGTCAGATCGGA	pbmc8k	5273	1748	5273	1748	150	13	2.84468	5273	1.29573	NA	NA
AGTGAGGTCGTCACGG	pbmc8k	5337	1727	5337	1727	120	14	2.24845	5337	1.31146	Th1/Th17 cells	CD4+ T cells
CTTCTCTAGGCATTGG	pbmc8k	4897	1502	4897	1502	202	13	4.12497	4897	1.20334	Non-switched memory B cells	B cells
GGGAATGTCTGATTCT	pbmc8k	5408	1771	5408	1771	212	14	3.92012	5408	1.3289	Classical monocytes	Monocytes
GCTCCTAAGGACAGAA	pbmc8k	5503	1645	5503	1645	159	13	2.88933	5503	1.35225	Non-switched memory B cells	B cells
TTGGAACGTGACAAAT	pbmc8k	5042	1491	5042	1491	159	14	3.15351	5042	1.23897	Non-switched memory B cells	B cells
GAGGTGACAGTGAGTG	pbmc8k	5691	1796	5691	1796	205	15	3.60218	5691	1.39844	Classical monocytes	Monocytes
TACCTTACACAGATTC	pbmc8k	4332	1675	4332	1675	123	13	2.83934	4332	1.0645	MAIT cells	T cells
CTCCTAGGTCTCCATC	pbmc8k	4677	1705	4677	1705	65	13	1.38978	4677	1.14928	T regulatory cells	CD4+ T cells
GGGTTGCCAAAGTGCG	pbmc8k	5214	1633	5214	1633	83	14	1.59187	5214	1.28123	Naive CD4 T cells	CD4+ T cells
CTTAACTTCCAGTATG	pbmc8k	4384	1484	4384	1484	163	14	3.71807	4384	1.07728	Non-switched memory B cells	B cells
CGACTTCCATACTCTT	pbmc8k	4059	1580	4059	1580	175	13	4.31141	4059	0.997415	Naive B cells	B cells
GACTAACCAGTGACAG	pbmc8k	4887	1586	4887	1586	105	11	2.14856	4887	1.20088	Th2 cells	CD4+ T cells
GAGTCCGCAGCATACT	pbmc8k	5202	1470	5202	1470	204	13	3.92157	5202	1.27828	Naive CD8 T cells	CD8+ T cells
CTACCCACAGTGACAG	pbmc8k	5672	1719	5672	1719	173	13	3.05007	5672	1.39378	Classical monocytes	Monocytes
TATTACCAGCCCAACC	pbmc8k	5349	1516	5349	1516	149	11	2.78557	5349	1.31441	Naive CD8 T cells	CD8+ T cells
TGACTAGGTCGCTTTC	pbmc8k	5175	1638	5175	1638	138	12	2.66667	5175	1.27165	Naive CD4 T cells	CD8+ T cells
CTGATCCCAGACTCGC	pbmc8k	5300	1495	5300	1495	94	13	1.77358	5300	1.30236	T regulatory cells	CD4+ T cells
CCTTACGTCGGAAACG	pbmc8k	5734	1810	5734	1810	113	12	1.9707	5734	1.40901	Th1/Th17 cells	CD4+ T cells
AAACCTGTCGCCAAAT	pbmc8k	5004	1482	5004	1482	114	12	2.27818	5004	1.22963	Naive CD4 T cells	CD4+ T cells
AGCTTGAGTCATATGC	pbmc8k	5376	1614	5376	1614	254	14	4.7247	5376	1.32104	Classical monocytes	Monocytes
GCATACACAAGCCATT	pbmc8k	4943	1622	4943	1622	103	12	2.08375	4943	1.21464	Th2 cells	CD4+ T cells
GTCTTCGAGATGCCAG	pbmc8k	5455	1561	5455	1561	149	13	2.73144	5455	1.34045	Naive CD8 T cells	CD8+ T cells
GGGTCTGTCCCAAGAT	pbmc8k	4094	1575	4094	1575	128	14	3.12653	4094	1.00602	Naive B cells	B cells
GTGCATACAAAGAATC	pbmc8k	4649	1618	4649	1618	108	13	2.32308	4649	1.14239	Th17 cells	CD4+ T cells
GCGACCAGTGCGATAG	pbmc8k	5290	1935	5290	1935	82	13	1.55009	5290	1.29991	Plasmacytoid dendritic cells	Dendritic cells
ACGAGCCGTGCAGACA	pbmc8k	6092	1861	6092	1861	258	14	4.23506	6092	1.49698	Classical monocytes	Monocytes
AGACGTTCACTACAGT	pbmc8k	4721	1354	4721	1354	156	13	3.30438	4721	1.16009	Naive CD8 T cells	CD8+ T cells
CACCAGGGTATCAGTC	pbmc8k	4904	1612	4904	1612	119	12	2.42659	4904	1.20506	Th1/Th17 cells	NA
CCCTCCTGTGTGACCC	pbmc8k	5331	1743	5331	1743	221	14	4.14556	5331	1.30998	Classical monocytes	Monocytes
ACGTCAAGTCGACTGC	pbmc8k	5358	1771	5358	1771	243	14	4.53527	5358	1.31662	NA	Monocytes
ATCCGAACATTACCTT	pbmc8k	4510	1432	4510	1432	95	11	2.10643	4510	1.10824	Naive CD8 T cells	CD8+ T cells
TCCACACCATTGAGCT	pbmc8k	4830	1592	4830	1592	143	13	2.96066	4830	1.18687	Central memory CD8 T cells	T cells
CATTATCCAACAACCT	pbmc8k	4342	1558	4342	1558	160	13	3.68494	4342	1.06696	MAIT cells	T cells
TAGAGCTAGAGCCTAG	pbmc8k	5522	1736	5522	1736	211	15	3.82108	5522	1.35692	Classical monocytes	Monocytes
GGAGCAATCACTTACT	pbmc8k	5039	1523	5039	1523	70	12	1.38916	5039	1.23823	Naive CD4 T cells	CD4+ T cells
GGATGTTTCAACGGGA	pbmc8k	4914	1739	4914	1739	198	14	4.0293	4914	1.20751	Vd2 gd T cells	T cells
CTCGAGGTCGTTACAG	pbmc8k	5925	1553	5925	1553	127	13	2.14346	5925	1.45595	Th17 cells	CD4+ T cells
TGGCTGGCAGTCCTTC	pbmc8k	4659	1498	4659	1498	150	13	3.21958	4659	1.14485	Non-switched memory B cells	B cells
ACTGATGCATCGGGTC	pbmc8k	5719	1880	5719	1880	203	13	3.54957	5719	1.40532	Classical monocytes	Monocytes
TTCGGTCTCACCACCT	pbmc8k	4642	1721	4642	1721	183	13	3.94227	4642	1.14067	NA	NA
CGATTGATCGTAGGAG	pbmc8k	5299	1785	5299	1785	256	14	4.8311	5299	1.30212	Classical monocytes	Monocytes
ACATCAGAGTCGTACT	pbmc8k	5819	1655	5819	1655	266	14	4.57123	5819	1.4299	Classical monocytes	Monocytes
TCACAAGTCAATACCG	pbmc8k	4891	1492	4891	1492	143	13	2.92374	4891	1.20186	Naive CD4 T cells	CD8+ T cells
ACAGCCGGTGGACGAT	pbmc8k	4963	1630	4963	1630	138	13	2.78058	4963	1.21955	Non-switched memory B cells	B cells
GTGGGTCGTCCAACTA	pbmc8k	5863	1809	5863	1809	193	14	3.29183	5863	1.44071	Classical monocytes	Monocytes
GATCGATGTCTTTCAT	pbmc8k	4731	1780	4731	1780	110	11	2.32509	4731	1.16254	Vd2 gd T cells	T cells
CCAGCGACAAGCGTAG	pbmc8k	5357	1580	5357	1580	141	14	2.63207	5357	1.31637	Naive CD8 T cells	CD8+ T cells
GCAAACTCAAGAGGCT	pbmc8k	5084	1553	5084	1553	100	14	1.96696	5084	1.24929	Th2 cells	CD4+ T cells
CCACTACCAGCTGTTA	pbmc8k	4674	1451	4674	1451	141	11	3.01669	4674	1.14854	Naive CD8 T cells	CD8+ T cells
TTTACTGAGTTGCAGG	pbmc8k	4227	1555	4227	1555	359	13	8.49302	4227	1.0387	Non-switched memory B cells	B cells
CACCTTGGTCCATGAT	pbmc8k	4729	1517	4729	1517	74	12	1.56481	4729	1.16205	Naive CD4 T cells	CD4+ T cells
TCAGCTCCATGCATGT	pbmc8k	4956	1534	4956	1534	131	13	2.64326	4956	1.21783	Naive CD8 T cells	CD8+ T cells
AGATTGCTCCTTTACA	pbmc8k	4141	1543	4141	1543	127	15	3.06689	4141	1.01756	Th17 cells	CD4+ T cells
AGCCTAAAGATAGTCA	pbmc8k	4095	1340	4095	1340	164	13	4.00488	4095	1.00626	Naive CD8 T cells	CD8+ T cells
CGGAGTCCATCCCATC	pbmc8k	5581	1632	5581	1632	111	14	1.98889	5581	1.37141	Th17 cells	CD4+ T cells
GTAGTCATCCATTCTA	pbmc8k	4754	1613	4754	1613	191	13	4.01767	4754	1.1682	Classical monocytes	Monocytes
TCCCGATCACCAGTTA	pbmc8k	4785	1535	4785	1535	103	13	2.15256	4785	1.17581	Naive CD4 T cells	CD4+ T cells
CAGAATCCAGCCTATA	pbmc8k	4574	1512	4574	1512	114	13	2.49235	4574	1.12397	Naive CD8 T cells	CD8+ T cells
AGCCTAAGTAAGGGAA	pbmc8k	4604	1501	4604	1501	110	13	2.38923	4604	1.13134	Naive CD8 T cells	CD8+ T cells
AAGTCTGGTTTGGGCC	pbmc8k	5521	1742	5521	1742	300	12	5.4338	5521	1.35667	Classical monocytes	Monocytes
ACTGCTCGTACTCAAC	pbmc8k	5321	1868	5321	1868	196	14	3.68352	5321	1.30752	Classical monocytes	Monocytes
CTAGAGTTCCGTTGTC	pbmc8k	5161	1561	5161	1561	160	14	3.10017	5161	1.26821	Th1/Th17 cells	CD4+ T cells
AAACGGGGTACCCAAT	pbmc8k	4868	1732	4868	1732	130	13	2.6705	4868	1.19621	Non-switched memory B cells	B cells
GTTACAGAGCAATATG	pbmc8k	4048	1356	4048	1356	116	12	2.86561	4048	0.994712	Non-switched memory B cells	B cells
AGAATAGTCAACCAAC	pbmc8k	4744	1548	4744	1548	120	13	2.52951	4744	1.16574	Th17 cells	CD4+ T cells
ATCCGAAAGAAACGAG	pbmc8k	4375	1550	4375	1550	121	14	2.76571	4375	1.07506	T regulatory cells	CD4+ T cells
GGTATTGCAATGGAAT	pbmc8k	4543	1457	4543	1457	79	12	1.73894	4543	1.11635	Follicular helper T cells	CD4+ T cells
ACGCCAGCACCAGGCT	pbmc8k	5722	1870	5722	1870	244	13	4.26424	5722	1.40606	Classical monocytes	Monocytes
CACACTCGTTTACTCT	pbmc8k	4689	1554	4689	1554	162	13	3.45489	4689	1.15222	Naive CD8 T cells	CD8+ T cells
GTTTCTACAGCTATTG	pbmc8k	4645	1619	4645	1619	142	13	3.05705	4645	1.14141	Central memory CD8 T cells	T cells
TTATGCTTCCGTCAAA	pbmc8k	4707	1518	4707	1518	138	14	2.9318	4707	1.15665	Naive CD8 T cells	CD8+ T cells
GTTCATTTCCAGTAGT	pbmc8k	4499	1413	4499	1413	106	13	2.35608	4499	1.10554	Naive CD4 T cells	CD4+ T cells
ACGGGCTTCATTATCC	pbmc8k	5238	1496	5238	1496	97	12	1.85185	5238	1.28713	Th2 cells	CD4+ T cells
ATCTGCCGTCTAGGTT	pbmc8k	5487	1782	5487	1782	158	16	2.87953	5487	1.34832	Classical monocytes	Monocytes
CTCGTCACACGTGAGA	pbmc8k	5740	1889	5740	1889	214	13	3.72822	5740	1.41049	Myeloid dendritic cells	Dendritic cells
AAAGATGGTTGTCTTT	pbmc8k	5054	1693	5054	1693	220	14	4.35299	5054	1.24192	Classical monocytes	Monocytes
CTTACCGTCACGACTA	pbmc8k	5000	1498	5000	1498	137	13	2.74	5000	1.22865	Naive CD8 T cells	CD8+ T cells
GGGATGATCGCTAGCG	pbmc8k	5018	1567	5018	1567	172	13	3.42766	5018	1.23307	Non-switched memory B cells	B cells
AAGTCTGCAGTTCATG	pbmc8k	4767	1413	4767	1413	118	13	2.47535	4767	1.17139	Naive CD8 T cells	CD8+ T cells
CTTAACTTCGACGGAA	pbmc8k	4904	1672	4904	1672	160	13	3.26264	4904	1.20506	Vd2 gd T cells	T cells
CGCTATCCACTTAACG	pbmc8k	4509	1482	4509	1482	94	13	2.08472	4509	1.10799	Naive CD8 T cells	CD8+ T cells
CTAATGGCAAGCGATG	pbmc8k	5318	1561	5318	1561	140	12	2.63257	5318	1.30679	Naive CD8 T cells	CD8+ T cells
GTGGGTCCAAGTAGTA	pbmc8k	5253	1527	5253	1527	143	12	2.72225	5253	1.29082	Naive CD8 T cells	CD8+ T cells
CTACCCAGTAATCACC	pbmc8k	4674	1473	4674	1473	138	14	2.9525	4674	1.14854	Naive CD8 T cells	CD8+ T cells
AGTGTCAGTCTCGTTC	pbmc8k	4980	1491	4980	1491	73	13	1.46586	4980	1.22373	Naive CD4 T cells	CD4+ T cells
CGCTTCACAATCGGTT	pbmc8k	5626	1754	5626	1754	246	14	4.37256	5626	1.38247	Classical monocytes	Monocytes
GGAAAGCCACTGTTAG	pbmc8k	5077	1509	5077	1509	137	13	2.69844	5077	1.24757	Th2 cells	CD4+ T cells
AACCATGTCACCTCGT	pbmc8k	5449	1619	5449	1619	241	17	4.42283	5449	1.33898	NA	NA
CAGGTGCTCTGGTATG	pbmc8k	5676	1676	5676	1676	175	12	3.08316	5676	1.39476	Th17 cells	CD4+ T cells
TCAGCTCGTACGACCC	pbmc8k	5248	2029	5248	2029	178	14	3.39177	5248	1.28959	Central memory CD8 T cells	CD8+ T cells
AAACCTGTCTCAAGTG	pbmc8k	4957	1666	4957	1666	187	15	3.77244	4957	1.21808	Th1/Th17 cells	CD4+ T cells
GATCTAGAGCAAATCA	pbmc8k	4471	1495	4471	1495	111	14	2.48267	4471	1.09865	Exhausted B cells	B cells
AGTGGGAGTCGGCACT	pbmc8k	5681	1714	5681	1714	211	14	3.71413	5681	1.39599	Classical monocytes	Monocytes
CCCATACCAGTTTACG	pbmc8k	4499	1507	4499	1507	112	14	2.48944	4499	1.10554	Th2 cells	CD4+ T cells
TGACTAGCAGACGCTC	pbmc8k	4949	1536	4949	1536	148	13	2.9905	4949	1.21611	Th1/Th17 cells	CD4+ T cells
GCATGATTCGAGCCCA	pbmc8k	3422	1348	3422	1348	225	13	6.5751	3422	0.840885	Naive B cells	B cells
AAAGATGGTCTTTCAT	pbmc8k	4929	1736	4929	1736	135	12	2.73889	4929	1.2112	Central memory CD8 T cells	CD8+ T cells
GTACGTATCTTAGCCC	pbmc8k	5346	1660	5346	1660	115	11	2.15114	5346	1.31367	Th1/Th17 cells	CD4+ T cells
GCAATCATCGTAGATC	pbmc8k	4591	1438	4591	1438	116	12	2.52668	4591	1.12814	Naive B cells	B cells
TTAGGACAGATGTGTA	pbmc8k	5433	1876	5433	1876	184	15	3.38671	5433	1.33505	Intermediate monocytes	Monocytes
CCTAAAGCATTAGGCT	pbmc8k	4702	1551	4702	1551	63	11	1.33986	4702	1.15542	Th2 cells	CD4+ T cells
GTTACAGGTCTCTTTA	pbmc8k	4848	1571	4848	1571	100	12	2.06271	4848	1.19129	Naive CD8 T cells	CD8+ T cells
CGCCAAGTCACCCGAG	pbmc8k	5151	1489	5151	1489	148	14	2.87323	5151	1.26575	Naive CD8 T cells	CD8+ T cells
GAAACTCCAAGACACG	pbmc8k	4736	1716	4736	1716	124	13	2.61824	4736	1.16377	T regulatory cells	CD4+ T cells
CGGACGTCACAACGTT	pbmc8k	5054	1601	5054	1601	157	12	3.10645	5054	1.24192	Th1/Th17 cells	CD4+ T cells
TCGTACCAGGACTGGT	pbmc8k	4401	1795	4401	1795	201	13	4.56714	4401	1.08145	Non classical monocytes	Monocytes
ACACCAATCGAGCCCA	pbmc8k	4785	1518	4785	1518	162	14	3.38558	4785	1.17581	Th2 cells	CD4+ T cells
ACATGGTCAGCCTTGG	pbmc8k	4900	1463	4900	1463	101	11	2.06122	4900	1.20407	Naive CD8 T cells	CD8+ T cells
TCAGCAACAGCATACT	pbmc8k	4872	1443	4872	1443	152	13	3.11987	4872	1.19719	Naive CD8 T cells	CD8+ T cells
TCAGCTCAGGCCCGTT	pbmc8k	5010	1624	5010	1624	140	14	2.79441	5010	1.2311	Naive CD8 T cells	CD8+ T cells
TGAGCCGAGTACGACG	pbmc8k	5386	1690	5386	1690	337	12	6.25696	5386	1.3235	Classical monocytes	Monocytes
GAACATCGTATGCTTG	pbmc8k	5074	1727	5074	1727	101	12	1.99054	5074	1.24683	Th17 cells	CD4+ T cells
CTCTGGTCATGGTCAT	pbmc8k	5132	1422	5132	1422	172	13	3.35152	5132	1.26108	Non-switched memory B cells	B cells
TCGTACCTCAACACAC	pbmc8k	4156	1418	4156	1418	188	13	4.52358	4156	1.02125	Non-switched memory B cells	B cells
AAACCTGGTTTGTTTC	pbmc8k	4560	1591	4560	1591	118	13	2.58772	4560	1.12052	Naive CD8 T cells	CD8+ T cells
GAACCTAAGCTAAGAT	pbmc8k	4554	1613	4554	1613	137	13	3.00834	4554	1.11905	Central memory CD8 T cells	T cells
TCGTACCAGAAACCAT	pbmc8k	5372	1570	5372	1570	112	14	2.08488	5372	1.32006	Th1/Th17 cells	CD4+ T cells
GATGCTACATTGGTAC	pbmc8k	4464	1566	4464	1566	158	13	3.53943	4464	1.09693	Central memory CD8 T cells	T cells
TTTATGCCAAGGACTG	pbmc8k	4693	1528	4693	1528	132	12	2.8127	4693	1.15321	Exhausted B cells	B cells
GTTTCTAGTTCGGCAC	pbmc8k	5337	1878	5337	1878	189	13	3.54132	5337	1.31146	Classical monocytes	Monocytes
GGCGACTGTGAGTATA	pbmc8k	5410	1829	5410	1829	223	14	4.122	5410	1.32939	Non classical monocytes	Monocytes
TCATTTGAGATGAGAG	pbmc8k	5343	1713	5343	1713	180	13	3.36889	5343	1.31293	Intermediate monocytes	Monocytes
AACTGGTTCTTCGAGA	pbmc8k	5148	1651	5148	1651	271	14	5.26418	5148	1.26501	Classical monocytes	Monocytes
GAAACTCTCTTATCTG	pbmc8k	4510	1447	4510	1447	155	13	3.43681	4510	1.10824	Non-switched memory B cells	B cells
GCTTGAAGTTTAAGCC	pbmc8k	4620	1524	4620	1524	194	14	4.19913	4620	1.13527	Non-switched memory B cells	B cells
ACGGGTCGTTCACGGC	pbmc8k	5022	1552	5022	1552	123	13	2.44922	5022	1.23405	Exhausted B cells	B cells
GGGTCTGGTTAAGACA	pbmc8k	5215	1795	5215	1795	118	14	2.2627	5215	1.28148	Th2 cells	CD4+ T cells
GGAACTTCATGACATC	pbmc8k	4560	1533	4560	1533	103	13	2.25877	4560	1.12052	Naive CD4 T cells	CD4+ T cells
TAAGTGCAGCGTTTAC	pbmc8k	5740	1846	5740	1846	275	14	4.79094	5740	1.41049	Intermediate monocytes	Monocytes
CATCAAGTCTCTGAGA	pbmc8k	4526	1814	4526	1814	102	13	2.25365	4526	1.11217	Vd2 gd T cells	T cells
CGCCAAGGTAAAGGAG	pbmc8k	4542	1620	4542	1620	141	12	3.10436	4542	1.1161	Naive CD4 T cells	CD8+ T cells
GGCGTGTTCACTATTC	pbmc8k	5481	1613	5481	1613	131	13	2.39007	5481	1.34684	Naive CD8 T cells	CD8+ T cells
GGAATAAGTAGTACCT	pbmc8k	4069	1487	4069	1487	87	11	2.13812	4069	0.999872	Non-switched memory B cells	B cells
GCGGGTTTCTGATACG	pbmc8k	5525	1831	5525	1831	201	16	3.63801	5525	1.35765	Classical monocytes	Monocytes
ATTGGACTCAAGAAGT	pbmc8k	4411	1574	4411	1574	174	15	3.94468	4411	1.08391	Central memory CD8 T cells	T cells
ACATACGAGGGTGTGT	pbmc8k	5133	1471	5133	1471	132	13	2.5716	5133	1.26133	Naive CD4 T cells	CD4+ T cells
CTCATTACACCTGGTG	pbmc8k	4730	1527	4730	1527	122	13	2.57928	4730	1.1623	Th17 cells	CD4+ T cells
CTAGAGTCACTTCGAA	pbmc8k	4551	1563	4551	1563	152	14	3.33993	4551	1.11831	Naive CD8 T cells	CD8+ T cells
ACAGCCGTCGTCGTTC	pbmc8k	5295	1538	5295	1538	126	14	2.3796	5295	1.30114	Non-switched memory B cells	B cells
AAGACCTCAGTTAACC	pbmc8k	5256	1665	5256	1665	208	12	3.95738	5256	1.29155	Classical monocytes	Monocytes
CCTAAAGAGTGGTAAT	pbmc8k	4360	1477	4360	1477	95	12	2.1789	4360	1.07138	Naive CD8 T cells	CD8+ T cells
TTAGTTCGTTGGGACA	pbmc8k	5324	1654	5324	1654	98	12	1.84072	5324	1.30826	Th2 cells	CD4+ T cells
ATCGAGTCACCAACCG	pbmc8k	5577	1783	5577	1783	283	13	5.07441	5577	1.37043	Classical monocytes	Monocytes
GCAATCATCTTGGGTA	pbmc8k	5176	1724	5176	1724	223	13	4.30835	5176	1.27189	Intermediate monocytes	Monocytes
GACGTGCAGGATATAC	pbmc8k	5127	1730	5127	1730	316	15	6.16345	5127	1.25985	Classical monocytes	Monocytes
ACGGGCTCATTACGAC	pbmc8k	4839	1720	4839	1720	256	16	5.29035	4839	1.18908	Classical monocytes	Monocytes
CTCGTCAAGACACTAA	pbmc8k	4699	1452	4699	1452	155	12	3.29857	4699	1.15468	Naive CD8 T cells	CD8+ T cells
CAGCAGCTCAACGAAA	pbmc8k	4597	1387	4597	1387	206	14	4.48118	4597	1.12962	Non-switched memory B cells	B cells
CTGAAACCAAACAACA	pbmc8k	4332	1398	4332	1398	139	15	3.20868	4332	1.0645	Non-switched memory B cells	B cells
TTGAACGCATCCCATC	pbmc8k	4796	1667	4796	1667	243	15	5.06672	4796	1.17852	Classical monocytes	Monocytes
GTATTCTAGCGTCAAG	pbmc8k	5303	1739	5303	1739	217	13	4.09202	5303	1.3031	NA	NA
AGCTTGAAGAAGGTGA	pbmc8k	5046	1562	5046	1562	124	13	2.45739	5046	1.23995	Th1/Th17 cells	CD4+ T cells
CCAATCCGTCGACTGC	pbmc8k	4995	1762	4995	1762	171	11	3.42342	4995	1.22742	MAIT cells	T cells
CTAATGGGTCGCCATG	pbmc8k	4969	1582	4969	1582	257	13	5.17207	4969	1.22103	NA	NA
CCTACACGTACCAGTT	pbmc8k	4617	1447	4617	1447	158	13	3.42214	4617	1.13453	Naive CD8 T cells	CD8+ T cells
GCGAGAACATGTAAGA	pbmc8k	5738	1723	5738	1723	248	15	4.32206	5738	1.40999	Classical monocytes	Monocytes
CAGCTGGAGAAACCTA	pbmc8k	4623	1472	4623	1472	198	14	4.28293	4623	1.13601	Non-switched memory B cells	B cells
GAATGAAGTATATGAG	pbmc8k	4260	1705	4260	1705	114	12	2.67606	4260	1.04681	Non-Vd2 gd T cells	T cells
CTCACACGTGGCTCCA	pbmc8k	4980	1528	4980	1528	147	14	2.95181	4980	1.22373	Naive CD4 T cells	CD8+ T cells
ACATGGTTCATCACCC	pbmc8k	4530	1337	4530	1337	148	13	3.26711	4530	1.11315	Naive CD8 T cells	CD8+ T cells
CTGATCCAGACGCTTT	pbmc8k	5789	1903	5789	1903	244	14	4.21489	5789	1.42253	Myeloid dendritic cells	Monocytes
GATGAAAAGATAGGAG	pbmc8k	4589	1558	4589	1558	96	12	2.09196	4589	1.12765	Naive CD8 T cells	CD8+ T cells
GTCGTAACATAAGACA	pbmc8k	6231	1865	6231	1865	259	14	4.15664	6231	1.53114	Classical monocytes	Monocytes
ACACCCTAGCGCTCCA	pbmc8k	4865	1441	4865	1441	168	12	3.45324	4865	1.19547	Naive CD8 T cells	CD8+ T cells
CTTAACTAGACACGAC	pbmc8k	4584	1612	4584	1612	84	13	1.83246	4584	1.12642	Naive CD4 T cells	CD8+ T cells
CATCGGGGTTAAAGTG	pbmc8k	5267	1571	5267	1571	132	13	2.50617	5267	1.29426	Th17 cells	CD4+ T cells
AGGGAGTTCTCTGTCG	pbmc8k	5120	1465	5120	1465	192	12	3.75	5120	1.25813	Naive CD8 T cells	CD8+ T cells
ACACCCTGTAAGTTCC	pbmc8k	4924	1655	4924	1655	252	14	5.11779	4924	1.20997	NA	Monocytes
TTGCGTCGTCCGAACC	pbmc8k	6500	1945	6500	1945	270	13	4.15385	6500	1.59724	NA	Monocytes
CATATGGTCCGCGTTT	pbmc8k	5202	1464	5202	1464	200	12	3.84468	5202	1.27828	Naive CD4 T cells	CD4+ T cells
TACTTACCACAAGACG	pbmc8k	4865	1676	4865	1676	222	14	4.56321	4865	1.19547	Classical monocytes	Monocytes
TGCGTGGAGTTAACGA	pbmc8k	5036	1559	5036	1559	227	13	4.50755	5036	1.23749	Naive B cells	B cells
TTTACTGTCCTTTACA	pbmc8k	5018	1548	5018	1548	137	14	2.73017	5018	1.23307	Th17 cells	CD4+ T cells
TAGTGGTCATGTAGTC	pbmc8k	5916	1860	5916	1860	317	13	5.35835	5916	1.45373	NA	NA
ATCATCTTCGGCTTGG	pbmc8k	4768	1537	4768	1537	127	13	2.66359	4768	1.17164	Th17 cells	CD4+ T cells
GGAATAATCATATCGG	pbmc8k	4573	1440	4573	1440	113	14	2.47103	4573	1.12372	Naive CD4 T cells	CD4+ T cells
CTTGGCTGTGGCCCTA	pbmc8k	5007	1540	5007	1540	137	13	2.73617	5007	1.23037	Non-switched memory B cells	B cells
CTCACACTCTAGAGTC	pbmc8k	4701	1441	4701	1441	94	12	1.99957	4701	1.15517	Th2 cells	CD4+ T cells
ACTGAGTGTGACCAAG	pbmc8k	4822	1423	4822	1423	176	14	3.64994	4822	1.18491	Non-switched memory B cells	B cells
CACAGTAAGTGAACGC	pbmc8k	4912	1449	4912	1449	129	12	2.62622	4912	1.20702	Naive CD4 T cells	CD4+ T cells
TGAGCCGTCACAAACC	pbmc8k	4800	1411	4800	1411	127	12	2.64583	4800	1.1795	Naive CD8 T cells	CD8+ T cells
CTACACCGTGATAAAC	pbmc8k	4427	1463	4427	1463	110	11	2.48475	4427	1.08784	Naive CD8 T cells	CD8+ T cells
GATGCTAAGTGGGCTA	pbmc8k	5154	1550	5154	1550	119	13	2.30889	5154	1.26649	Th17 cells	CD4+ T cells
GGACAGAAGCTGAAAT	pbmc8k	4862	1658	4862	1658	134	12	2.75607	4862	1.19474	Th17 cells	CD4+ T cells
GCTTGAACAAGGACTG	pbmc8k	5182	1739	5182	1739	234	12	4.51563	5182	1.27337	Classical monocytes	Monocytes
TGCGCAGAGGTGCAAC	pbmc8k	5194	1620	5194	1620	129	13	2.48363	5194	1.27632	Th17 cells	CD4+ T cells
AGGTCATTCGGATGGA	pbmc8k	5159	1632	5159	1632	104	11	2.01589	5159	1.26772	Th1/Th17 cells	CD4+ T cells
CGTAGGCGTACGACCC	pbmc8k	5762	1805	5762	1805	224	13	3.88754	5762	1.41589	Intermediate monocytes	Monocytes
GTAACTGCACTCGACG	pbmc8k	5388	1852	5388	1852	221	15	4.10171	5388	1.32399	Classical monocytes	Monocytes
CGTGTCTCAGCGATCC	pbmc8k	5381	1925	5381	1925	226	14	4.19996	5381	1.32227	Vd2 gd T cells	NA
CCTCTGACACCTTGTC	pbmc8k	5482	1671	5482	1671	167	12	3.04633	5482	1.34709	Classical monocytes	Monocytes
TACCTTAAGACCACGA	pbmc8k	5225	1790	5225	1790	301	14	5.76077	5225	1.28393	Classical monocytes	Monocytes
TCCCGATAGCTGATAA	pbmc8k	4378	1764	4378	1764	115	14	2.62677	4378	1.0758	MAIT cells	T cells
CGGACGTAGTAACCCT	pbmc8k	4953	1476	4953	1476	129	12	2.60448	4953	1.2171	Naive CD8 T cells	CD8+ T cells
CACCAGGCAGTCTTCC	pbmc8k	4591	1507	4591	1507	112	13	2.43956	4591	1.12814	Exhausted B cells	B cells
ATCTGCCTCTTCAACT	pbmc8k	4594	1421	4594	1421	130	13	2.82978	4594	1.12888	Naive CD4 T cells	CD4+ T cells
TGAAAGAAGAGCCCAA	pbmc8k	5277	1585	5277	1585	90	11	1.70551	5277	1.29671	Th17 cells	CD4+ T cells
CGGAGTCCAAGCCGCT	pbmc8k	4888	1503	4888	1503	158	14	3.23241	4888	1.20112	Non-switched memory B cells	B cells
CGGTTAATCGAGCCCA	pbmc8k	4908	1594	4908	1594	161	13	3.28036	4908	1.20604	Non-switched memory B cells	B cells
CACAGGCAGCCACGTC	pbmc8k	5656	1840	5656	1840	200	12	3.53607	5656	1.38984	Classical monocytes	Monocytes
TTGGCAAGTTCGGCAC	pbmc8k	4889	1556	4889	1556	164	13	3.35447	4889	1.20137	Non-switched memory B cells	B cells
TCTATTGCACAGGTTT	pbmc8k	5173	1546	5173	1546	81	12	1.56582	5173	1.27116	Th1/Th17 cells	CD4+ T cells
CTGTGCTGTTACAGAA	pbmc8k	4867	1611	4867	1611	163	14	3.34909	4867	1.19596	MAIT cells	T cells
CTAGTGATCTTGTACT	pbmc8k	4326	1497	4326	1497	157	13	3.62922	4326	1.06302	Naive CD8 T cells	CD8+ T cells
ATTCTACGTACCAGTT	pbmc8k	4651	1473	4651	1473	128	13	2.7521	4651	1.14289	Naive CD8 T cells	CD8+ T cells
CTGTTTATCAACGGCC	pbmc8k	4926	1405	4926	1405	137	11	2.78116	4926	1.21046	Naive CD8 T cells	CD8+ T cells
AAAGCAAAGCTAAGAT	pbmc8k	5145	1795	5145	1795	218	15	4.23712	5145	1.26428	Classical monocytes	Monocytes
ATCTACTCAGGCAGTA	pbmc8k	4558	1577	4558	1577	164	13	3.59807	4558	1.12003	Classical monocytes	Monocytes
GCGAGAAAGTTAGCGG	pbmc8k	5302	1603	5302	1603	124	13	2.33874	5302	1.30286	Th2 cells	CD4+ T cells
TACTCATCATGTCTCC	pbmc8k	4866	1586	4866	1586	157	14	3.22647	4866	1.19572	Th2 cells	CD4+ T cells
ACACCCTGTCATTAGC	pbmc8k	4155	1646	4155	1646	128	11	3.08063	4155	1.021	Th2 cells	CD4+ T cells
CATTCGCTCTCGCTTG	pbmc8k	4914	1564	4914	1564	118	12	2.4013	4914	1.20751	Non-switched memory B cells	B cells
ATGGGAGAGTACGTTC	pbmc8k	5121	1790	5121	1790	249	12	4.86233	5121	1.25838	Classical monocytes	Monocytes
ACTATCTAGGAATTAC	pbmc8k	4192	1362	4192	1362	92	14	2.19466	4192	1.0301	Non-switched memory B cells	B cells
TCAGGTACACATGGGA	pbmc8k	4743	1541	4743	1541	139	12	2.93063	4743	1.16549	Naive B cells	B cells
ATTATCCCAGACAGGT	pbmc8k	4280	1478	4280	1478	137	12	3.20093	4280	1.05172	Naive CD4 T cells	CD4+ T cells
GACACGCGTGACAAAT	pbmc8k	4687	1592	4687	1592	170	14	3.62705	4687	1.15173	NA	NA
GAAGCAGAGAACTGTA	pbmc8k	5253	1745	5253	1745	250	15	4.75919	5253	1.29082	Classical monocytes	Monocytes
GATCTAGAGCTACCTA	pbmc8k	4700	1529	4700	1529	129	12	2.74468	4700	1.15493	Central memory CD8 T cells	T cells
ACGCCGATCCCATTAT	pbmc8k	5026	1518	5026	1518	100	12	1.98965	5026	1.23503	Naive CD8 T cells	CD8+ T cells
ACACTGATCCATTCTA	pbmc8k	3796	1344	3796	1344	91	14	2.39726	3796	0.932788	Naive CD4 T cells	CD4+ T cells
AGCTTGACATTCCTCG	pbmc8k	3780	1595	3780	1595	164	15	4.33862	3780	0.928856	Naive CD4 T cells	CD4+ T cells
GGAATAAGTACGCTGC	pbmc8k	4955	1594	4955	1594	192	14	3.87487	4955	1.21759	Non-switched memory B cells	B cells
CATATGGAGAACAACT	pbmc8k	4106	1369	4106	1369	69	13	1.68047	4106	1.00896	Th1/Th17 cells	CD4+ T cells
AAGGCAGGTACTCGCG	pbmc8k	5356	1675	5356	1675	262	13	4.89171	5356	1.31613	Intermediate monocytes	Monocytes
GGGACCTGTTGGTTTG	pbmc8k	4920	1559	4920	1559	75	12	1.52439	4920	1.20899	Th2 cells	CD4+ T cells
ACGGGTCTCTGAGGGA	pbmc8k	5086	1512	5086	1512	97	13	1.9072	5086	1.24978	Th1/Th17 cells	CD4+ T cells
CGCGTTTGTCGCTTCT	pbmc8k	5098	1450	5098	1450	144	13	2.82464	5098	1.25273	Th1/Th17 cells	CD4+ T cells
ATCCGAAAGTAGTGCG	pbmc8k	4555	1448	4555	1448	142	14	3.11745	4555	1.1193	Naive CD8 T cells	CD8+ T cells
ACTTTCACACTGAAGG	pbmc8k	4953	1508	4953	1508	112	12	2.26126	4953	1.2171	T regulatory cells	CD4+ T cells
GACAGAGGTTCGGGCT	pbmc8k	5345	1780	5345	1780	221	13	4.13471	5345	1.31342	Classical monocytes	Monocytes
TACACGAGTGATGATA	pbmc8k	4796	1479	4796	1479	165	13	3.44037	4796	1.17852	Th1/Th17 cells	CD4+ T cells
CGGCTAGGTGATGATA	pbmc8k	4497	1594	4497	1594	83	12	1.84567	4497	1.10504	Naive CD4 T cells	CD4+ T cells
GTCTTCGAGATACACA	pbmc8k	4873	1536	4873	1536	127	13	2.6062	4873	1.19744	Th1/Th17 cells	CD4+ T cells
GCGCAACTCTGGGCCA	pbmc8k	5420	1481	5420	1481	122	13	2.25092	5420	1.33185	Th17 cells	CD4+ T cells
AGTGTCATCTGCGTAA	pbmc8k	4424	1635	4424	1635	140	13	3.16456	4424	1.08711	Non-switched memory B cells	B cells
TGAGGGAAGTTTGCGT	pbmc8k	5182	1663	5182	1663	228	12	4.39985	5182	1.27337	Classical monocytes	Monocytes
GAAACTCGTTACGGAG	pbmc8k	4719	1622	4719	1622	161	12	3.41174	4719	1.1596	Th1 cells	CD4+ T cells
CTTTGCGTCATCTGCC	pbmc8k	5196	1444	5196	1444	129	13	2.48268	5196	1.27681	Non-switched memory B cells	B cells
CGAGCCATCGCTTGTC	pbmc8k	5054	1438	5054	1438	128	13	2.53265	5054	1.24192	Naive CD8 T cells	CD8+ T cells
GATGCTATCATACGGT	pbmc8k	4684	1441	4684	1441	144	12	3.0743	4684	1.151	Naive CD8 T cells	CD8+ T cells
AACTCTTTCAATCACG	pbmc8k	4255	1431	4255	1431	145	14	3.40776	4255	1.04558	Naive CD4 T cells	CD4+ T cells
ATGCGATAGACATAAC	pbmc8k	4449	1485	4449	1485	118	12	2.65228	4449	1.09325	Th17 cells	CD4+ T cells
GATCAGTGTGTAATGA	pbmc8k	4186	1502	4186	1502	124	12	2.96226	4186	1.02862	Naive CD8 T cells	CD8+ T cells
GACGCGTTCGTTTAGG	pbmc8k	5681	1658	5681	1658	147	14	2.58757	5681	1.39599	Naive CD8 T cells	CD8+ T cells
GAATGAATCTTGAGAC	pbmc8k	4119	1709	4119	1709	106	13	2.57344	4119	1.01216	Vd2 gd T cells	T cells
GTGTGCGAGCGTGAAC	pbmc8k	5437	1795	5437	1795	308	13	5.66489	5437	1.33603	Classical monocytes	Monocytes
GTTTCTAAGGTGATTA	pbmc8k	5193	1794	5193	1794	201	13	3.8706	5193	1.27607	NA	NA
TCAACGATCATGTCCC	pbmc8k	4709	1653	4709	1653	115	14	2.44213	4709	1.15714	Th17 cells	CD4+ T cells
GCGAGAAGTACGCACC	pbmc8k	5672	1883	5672	1883	244	13	4.30183	5672	1.39378	Intermediate monocytes	Monocytes
CCGGTAGAGGCTAGAC	pbmc8k	5328	1568	5328	1568	66	11	1.23874	5328	1.30924	Th17 cells	CD4+ T cells
ATTCTACCAAGCGTAG	pbmc8k	4681	1499	4681	1499	144	13	3.07627	4681	1.15026	Naive CD8 T cells	CD8+ T cells
ACTTTCATCACTGGGC	pbmc8k	4567	1670	4567	1670	112	13	2.45238	4567	1.12224	NA	CD8+ T cells
ATCTGCCCATCTATGG	pbmc8k	4693	1391	4693	1391	126	13	2.68485	4693	1.15321	Naive CD8 T cells	CD8+ T cells
AAACCTGTCCGTTGCT	pbmc8k	4325	1409	4325	1409	108	14	2.49711	4325	1.06278	Non-switched memory B cells	B cells
CAAGATCTCACATAGC	pbmc8k	4910	1703	4910	1703	299	15	6.08961	4910	1.20653	Classical monocytes	Monocytes
CCCTCCTTCAGTCAGT	pbmc8k	5241	1756	5241	1756	203	14	3.87331	5241	1.28787	Classical monocytes	Monocytes
CAACCAACATTTGCTT	pbmc8k	4299	1422	4299	1422	110	12	2.55873	4299	1.05639	Non-switched memory B cells	B cells
CAGCTGGGTCTCATCC	pbmc8k	5017	1752	5017	1752	168	12	3.34861	5017	1.23282	Classical monocytes	Monocytes
CAGCCGAGTCGTCTTC	pbmc8k	5062	1599	5062	1599	148	14	2.92375	5062	1.24388	Naive CD8 T cells	CD8+ T cells
CACCTTGTCAGCTGGC	pbmc8k	4860	1603	4860	1603	87	13	1.79012	4860	1.19424	Th2 cells	CD4+ T cells
TGTGGTAAGTCCATAC	pbmc8k	4805	1594	4805	1594	234	14	4.86993	4805	1.18073	Classical monocytes	Monocytes
CACTCCACACAAGCCC	pbmc8k	4846	1602	4846	1602	218	16	4.49856	4846	1.1908	Classical monocytes	Monocytes
TACTCATTCCACGAAT	pbmc8k	4084	1417	4084	1417	103	12	2.52204	4084	1.00356	Non-switched memory B cells	B cells
GAAATGAGTAGGGACT	pbmc8k	4177	1593	4177	1593	129	15	3.08834	4177	1.02641	Naive CD8 T cells	CD8+ T cells
GTCAAGTCACAGGTTT	pbmc8k	4856	1548	4856	1548	86	13	1.771	4856	1.19326	Follicular helper T cells	CD4+ T cells
CTCGTCAGTCTTTCAT	pbmc8k	4383	1489	4383	1489	119	12	2.71504	4383	1.07703	Non-switched memory B cells	B cells
AGCTCTCCAGCTGGCT	pbmc8k	4126	1596	4126	1596	246	15	5.96219	4126	1.01388	Non-switched memory B cells	B cells
AATCCAGTCAAACCGT	pbmc8k	5022	1599	5022	1599	191	12	3.80327	5022	1.23405	Classical monocytes	Monocytes
CCATGTCAGGCGTACA	pbmc8k	5151	1844	5151	1844	180	14	3.49447	5151	1.26575	T regulatory cells	CD4+ T cells
CTCTAATTCATCGCTC	pbmc8k	4206	1489	4206	1489	144	13	3.42368	4206	1.03354	Naive CD4 T cells	CD4+ T cells
CAGATCATCATCACCC	pbmc8k	4652	1485	4652	1485	140	14	3.00946	4652	1.14313	Naive CD8 T cells	CD8+ T cells
GAAACTCGTTGTCTTT	pbmc8k	4043	1470	4043	1470	197	14	4.87262	4043	0.993483	Non-switched memory B cells	B cells
GTGCTTCAGTCATGCT	pbmc8k	4915	1706	4915	1706	207	12	4.2116	4915	1.20776	Classical monocytes	Monocytes
CTACGTCAGTATGACA	pbmc8k	4318	1605	4318	1605	83	13	1.92219	4318	1.06106	Th2 cells	CD4+ T cells
GCATACAAGTTACCCA	pbmc8k	4428	1485	4428	1485	135	12	3.04878	4428	1.08809	Th2 cells	CD4+ T cells
AGCTTGAGTGACGGTA	pbmc8k	5218	1472	5218	1472	110	12	2.10809	5218	1.28221	Th1/Th17 cells	CD4+ T cells
GAGTCCGCATGAGCGA	pbmc8k	5051	1733	5051	1733	75	12	1.48485	5051	1.24118	T regulatory cells	CD4+ T cells
AAAGCAATCCCTGACT	pbmc8k	3927	1608	3927	1608	94	13	2.39368	3927	0.964978	T regulatory cells	CD4+ T cells
AAACCTGGTAAGAGGA	pbmc8k	4729	1476	4729	1476	163	13	3.44682	4729	1.16205	Naive CD8 T cells	CD8+ T cells
CGTCCATGTGCAACGA	pbmc8k	4968	1451	4968	1451	104	12	2.0934	4968	1.22078	Naive CD8 T cells	CD8+ T cells
CAGCTAATCAGCACAT	pbmc8k	4333	1969	4333	1969	89	13	2.054	4333	1.06474	Natural killer cells	NK cells
CACTCCAGTACAGTGG	pbmc8k	5261	1768	5261	1768	322	13	6.12051	5261	1.29278	Classical monocytes	Monocytes
ATCACGAGTTTCGCTC	pbmc8k	4981	1419	4981	1419	119	13	2.38908	4981	1.22398	Naive CD4 T cells	CD4+ T cells
CCTTCGATCGGCGCTA	pbmc8k	5559	1792	5559	1792	123	13	2.21263	5559	1.36601	Th2 cells	CD4+ T cells
ATTATCCCAGTGGAGT	pbmc8k	3300	1346	3300	1346	176	13	5.33333	3300	0.810906	Naive B cells	B cells
GGAATAAAGTGGTAAT	pbmc8k	4829	1589	4829	1589	268	14	5.5498	4829	1.18663	Classical monocytes	Monocytes
CCTACCACAAGTAGTA	pbmc8k	4270	1325	4270	1325	109	13	2.55269	4270	1.04926	Naive CD4 T cells	CD4+ T cells
TGGCCAGAGAGCTGGT	pbmc8k	5016	1497	5016	1497	170	14	3.38915	5016	1.23258	Central memory CD8 T cells	T cells
CGATTGAAGGTGTTAA	pbmc8k	4632	1676	4632	1676	145	12	3.1304	4632	1.13822	Th1/Th17 cells	CD4+ T cells
AACTCCCAGGTGATTA	pbmc8k	4954	1638	4954	1638	162	12	3.27008	4954	1.21734	Classical monocytes	Monocytes
CAGTAACAGAGCCCAA	pbmc8k	4490	1540	4490	1540	120	13	2.67261	4490	1.10332	Th2 cells	CD4+ T cells
GAACGGACAGCCAATT	pbmc8k	5395	1766	5395	1766	246	15	4.55978	5395	1.32571	Classical monocytes	Monocytes
CAGCCGAGTCTTGATG	pbmc8k	5121	1712	5121	1712	187	12	3.65163	5121	1.25838	Classical monocytes	Monocytes
CACACTCCATATGGTC	pbmc8k	4907	1648	4907	1648	330	14	6.72509	4907	1.20579	Classical monocytes	Monocytes
CCAATCCTCCGCATCT	pbmc8k	4246	1504	4246	1504	141	13	3.32077	4246	1.04337	Naive CD8 T cells	CD8+ T cells
ATCACGAAGACACTAA	pbmc8k	4204	1575	4204	1575	154	12	3.66318	4204	1.03305	Th1/Th17 cells	T cells
AAAGTAGTCCCACTTG	pbmc8k	4370	1449	4370	1449	119	14	2.72311	4370	1.07384	Naive CD8 T cells	CD8+ T cells
CAAGATCCACGTTGGC	pbmc8k	5103	1641	5103	1641	137	13	2.6847	5103	1.25396	Th1/Th17 cells	CD4+ T cells
TCGAGGCGTCGCATCG	pbmc8k	5696	1886	5696	1886	269	13	4.72261	5696	1.39967	Classical monocytes	Monocytes
CCTATTATCGCGCCAA	pbmc8k	5200	1530	5200	1530	136	12	2.61538	5200	1.27779	Naive CD8 T cells	CD8+ T cells
CGTTGGGAGAGCCTAG	pbmc8k	4549	1657	4549	1657	255	13	5.60563	4549	1.11782	Classical monocytes	Monocytes
AGCTCTCTCCGATATG	pbmc8k	5346	1607	5346	1607	248	14	4.63898	5346	1.31367	NA	NA
CCTAGCTCAATCGGTT	pbmc8k	4474	1539	4474	1539	133	12	2.97273	4474	1.09939	Natural killer cells	NK cells
CGAGCACCACGGTAAG	pbmc8k	4397	1578	4397	1578	206	14	4.68501	4397	1.08047	Non-switched memory B cells	B cells
CACCAGGCAGTCAGAG	pbmc8k	4840	1457	4840	1457	89	12	1.83884	4840	1.18933	Naive CD4 T cells	CD4+ T cells
TCTTTCCCAGTGACAG	pbmc8k	4502	1440	4502	1440	129	13	2.86539	4502	1.10627	Naive CD4 T cells	CD4+ T cells
AGGGATGGTCAATACC	pbmc8k	4818	1481	4818	1481	161	13	3.34164	4818	1.18392	Naive CD8 T cells	CD8+ T cells
CACCTTGCAGCTGCTG	pbmc8k	4707	1533	4707	1533	139	14	2.95305	4707	1.15665	Non-switched memory B cells	B cells
CCCAATCGTTGTACAC	pbmc8k	4163	1561	4163	1561	347	14	8.33534	4163	1.02297	Classical monocytes	Monocytes
TATTACCGTTGTTTGG	pbmc8k	4901	1721	4901	1721	240	14	4.89696	4901	1.20432	Intermediate monocytes	Monocytes
GAACCTATCAGTGCAT	pbmc8k	4009	1612	4009	1612	118	13	2.94338	4009	0.985128	Central memory CD8 T cells	CD8+ T cells
CTCTACGTCAGGATCT	pbmc8k	4822	1498	4822	1498	133	11	2.75819	4822	1.18491	Naive CD8 T cells	CD8+ T cells
TGGGCGTAGGGCACTA	pbmc8k	4897	1655	4897	1655	124	13	2.53216	4897	1.20334	Vd2 gd T cells	T cells
TCAATCTGTCATCGGC	pbmc8k	4718	1471	4718	1471	113	12	2.39508	4718	1.15935	Non-switched memory B cells	B cells
ACTATCTAGATGGGTC	pbmc8k	4430	1814	4430	1814	166	13	3.74718	4430	1.08858	Natural killer cells	NA
AGCATACAGCCTTGAT	pbmc8k	4647	1526	4647	1526	116	12	2.49623	4647	1.1419	Naive CD8 T cells	CD8+ T cells
CATATGGAGGTCATCT	pbmc8k	4702	1586	4702	1586	138	14	2.93492	4702	1.15542	Th1/Th17 cells	CD4+ T cells
TCTCTAACAAGCGTAG	pbmc8k	4743	1471	4743	1471	156	14	3.28906	4743	1.16549	Naive CD8 T cells	CD8+ T cells
TGGTTAGGTTTCCACC	pbmc8k	4572	1403	4572	1403	116	13	2.53718	4572	1.12347	Naive CD8 T cells	CD8+ T cells
TGAGGGACATCCAACA	pbmc8k	4719	1655	4719	1655	294	16	6.23013	4719	1.1596	Classical monocytes	Monocytes
GGTGTTATCAATAAGG	pbmc8k	4128	1576	4128	1576	105	12	2.5436	4128	1.01437	T regulatory cells	CD4+ T cells
GGGCACTTCTAGCACA	pbmc8k	4626	1522	4626	1522	107	12	2.31301	4626	1.13674	Th2 cells	CD4+ T cells
CTCTAATGTCAATGTC	pbmc8k	3873	1378	3873	1378	68	12	1.75574	3873	0.951709	Non-switched memory B cells	B cells
GAATAAGAGTGCGATG	pbmc8k	5216	1429	5216	1429	179	13	3.43175	5216	1.28172	Naive CD8 T cells	CD8+ T cells
TGAGCATTCACGACTA	pbmc8k	4383	1543	4383	1543	106	14	2.41843	4383	1.07703	Th1/Th17 cells	CD4+ T cells
GACACGCTCGTTTATC	pbmc8k	4844	1654	4844	1654	136	12	2.8076	4844	1.19031	MAIT cells	T cells
CACACTCTCCCTAACC	pbmc8k	4291	1431	4291	1431	133	14	3.09951	4291	1.05442	Th2 cells	CD4+ T cells
TCTTCGGGTCTCCATC	pbmc8k	4333	1499	4333	1499	119	15	2.74637	4333	1.06474	Th2 cells	CD4+ T cells
CGTAGGCCACAGGTTT	pbmc8k	5780	2007	5780	2007	248	14	4.29066	5780	1.42031	Classical monocytes	Monocytes
ATTGGTGGTCACCCAG	pbmc8k	4545	1540	4545	1540	79	12	1.73817	4545	1.11684	Th17 cells	CD4+ T cells
CCAATCCAGGCACATG	pbmc8k	4963	1631	4963	1631	225	13	4.53355	4963	1.21955	Classical monocytes	Monocytes
TGACGGCGTGGCGAAT	pbmc8k	4940	1499	4940	1499	160	13	3.23887	4940	1.2139	Non-switched memory B cells	B cells
CACCTTGGTTGCCTCT	pbmc8k	3855	1801	3855	1801	115	13	2.98314	3855	0.947286	Natural killer cells	NK cells
GTGAAGGAGTACATGA	pbmc8k	4957	1745	4957	1745	137	12	2.76377	4957	1.21808	Classical monocytes	Monocytes
TACGGTAAGGCATGGT	pbmc8k	3681	1654	3681	1654	128	15	3.47732	3681	0.904529	Natural killer cells	NK cells
CATCAGAGTAATAGCA	pbmc8k	4034	1313	4034	1313	113	11	2.80119	4034	0.991271	Naive CD4 T cells	CD4+ T cells
TTGTAGGCACCAGATT	pbmc8k	5048	1499	5048	1499	97	13	1.92155	5048	1.24044	Th1/Th17 cells	CD4+ T cells
CCTATTAGTGTGGTTT	pbmc8k	4936	1716	4936	1716	243	16	4.92301	4936	1.21292	Classical monocytes	Monocytes
GATCGATTCACCGTAA	pbmc8k	4581	1386	4581	1386	93	12	2.03012	4581	1.12569	Naive CD4 T cells	CD4+ T cells
CTGCGGACATCCCACT	pbmc8k	5102	1541	5102	1541	207	14	4.05723	5102	1.25371	Intermediate monocytes	Monocytes
GGGACCTTCTCTAGGA	pbmc8k	4834	1653	4834	1653	207	14	4.28217	4834	1.18785	Classical monocytes	Monocytes
GCTTCCAGTAAAGTCA	pbmc8k	4409	1464	4409	1464	80	12	1.81447	4409	1.08342	Naive CD8 T cells	CD8+ T cells
CATGGCGCAGCTGTAT	pbmc8k	5103	1564	5103	1564	78	14	1.52851	5103	1.25396	Naive CD4 T cells	CD4+ T cells
AAGGCAGTCAGGCAAG	pbmc8k	4334	1901	4334	1901	111	11	2.56114	4334	1.06499	Natural killer cells	NK cells
CGGCTAGAGTGATCGG	pbmc8k	5187	1424	5187	1424	243	13	4.68479	5187	1.2746	Non-switched memory B cells	B cells
CGAATGTGTGAGGCTA	pbmc8k	5168	1341	5168	1341	144	12	2.78638	5168	1.26993	Naive CD4 T cells	CD4+ T cells
TGAAAGATCAGCAACT	pbmc8k	5009	1703	5009	1703	190	12	3.79317	5009	1.23086	Classical monocytes	Monocytes
TACTTACTCCCTGACT	pbmc8k	4380	1435	4380	1435	92	13	2.10046	4380	1.07629	Naive CD8 T cells	CD8+ T cells
GGACAAGAGAGAACAG	pbmc8k	4857	1627	4857	1627	257	14	5.29133	4857	1.19351	Classical monocytes	Monocytes
GCTCCTACAGCCTGTG	pbmc8k	5099	1663	5099	1663	169	15	3.31438	5099	1.25297	Classical monocytes	Monocytes
ACGATACAGCCACCTG	pbmc8k	4637	1449	4637	1449	141	13	3.04076	4637	1.13945	Naive CD4 T cells	CD4+ T cells
TGGCGCATCAGTTTGG	pbmc8k	4636	1557	4636	1557	79	12	1.70406	4636	1.1392	Naive CD8 T cells	CD8+ T cells
GGGCATCCATAAAGGT	pbmc8k	4811	1436	4811	1436	92	12	1.91228	4811	1.1822	Th2 cells	CD4+ T cells
GGGACCTCAAACTGTC	pbmc8k	5200	1787	5200	1787	189	14	3.63462	5200	1.27779	Classical monocytes	Monocytes
AGCTTGAGTTAAGAAC	pbmc8k	4404	1390	4404	1390	186	13	4.22343	4404	1.08219	NA	T cells
AACTCCCAGAAGGGTA	pbmc8k	4554	1389	4554	1389	154	13	3.38164	4554	1.11905	Non-switched memory B cells	B cells
TGTGTTTCACTCGACG	pbmc8k	4872	1488	4872	1488	100	12	2.05255	4872	1.19719	Th1/Th17 cells	CD4+ T cells
ATCACGAGTGAGGCTA	pbmc8k	4663	1603	4663	1603	153	13	3.28115	4663	1.14583	Th1/Th17 cells	CD4+ T cells
TCGAGGCCACGAAATA	pbmc8k	5158	1592	5158	1592	285	15	5.5254	5158	1.26747	Classical monocytes	Monocytes
TTCTTAGGTGACTACT	pbmc8k	4362	1670	4362	1670	68	11	1.55892	4362	1.07187	T regulatory cells	CD4+ T cells
TAAACCGGTCGTGGCT	pbmc8k	5421	1743	5421	1743	250	14	4.6117	5421	1.3321	Classical monocytes	Monocytes
AACCATGTCATGGTCA	pbmc8k	4179	1451	4179	1451	90	12	2.15363	4179	1.0269	Th2 cells	CD4+ T cells
GTTAAGCCATTGGTAC	pbmc8k	4809	1394	4809	1394	112	13	2.32897	4809	1.18171	Naive CD8 T cells	CD8+ T cells
CCTTCGAGTCGAGTTT	pbmc8k	4848	1494	4848	1494	178	13	3.67162	4848	1.19129	Naive CD8 T cells	CD8+ T cells
CATCAAGAGCCACCTG	pbmc8k	5095	1630	5095	1630	168	15	3.29735	5095	1.25199	MAIT cells	T cells
GGGACCTCATGATCCA	pbmc8k	4666	1432	4666	1432	126	11	2.70039	4666	1.14657	Naive CD8 T cells	CD8+ T cells
TTCTACAAGCTGTTCA	pbmc8k	4293	1508	4293	1508	147	12	3.42418	4293	1.05492	Naive CD8 T cells	CD8+ T cells
TGACAACCAACTGCGC	pbmc8k	4946	1558	4946	1558	107	12	2.16336	4946	1.21538	Naive CD8 T cells	CD8+ T cells
TATCTCAGTCGCATAT	pbmc8k	4873	1469	4873	1469	115	11	2.35994	4873	1.19744	Naive CD4 T cells	CD4+ T cells
TAAGAGACAGGTTTCA	pbmc8k	4450	1344	4450	1344	61	12	1.37079	4450	1.09349	Naive CD4 T cells	CD4+ T cells
ACGAGCCTCAATCTCT	pbmc8k	4778	1514	4778	1514	125	15	2.61616	4778	1.17409	Naive CD8 T cells	CD8+ T cells
CAAGGCCGTCGAGTTT	pbmc8k	5569	1755	5569	1755	248	16	4.45322	5569	1.36847	Classical monocytes	Monocytes
CTCACACAGTGTCCCG	pbmc8k	4746	1533	4746	1533	106	12	2.23346	4746	1.16623	Follicular helper T cells	CD4+ T cells
CCGTACTGTTCCTCCA	pbmc8k	3839	1757	3839	1757	121	12	3.15186	3839	0.943354	Natural killer cells	NK cells
GTGCAGCCAAAGCGGT	pbmc8k	4854	1508	4854	1508	171	15	3.52287	4854	1.19277	Naive CD8 T cells	CD8+ T cells
ACCTTTATCCAAGCCG	pbmc8k	4145	1506	4145	1506	122	14	2.94331	4145	1.01855	Naive B cells	B cells
TTGACTTTCTTTACAC	pbmc8k	4428	1519	4428	1519	130	14	2.93586	4428	1.08809	Th17 cells	CD4+ T cells
CTGGTCTGTTGTCTTT	pbmc8k	4002	1661	4002	1661	105	13	2.62369	4002	0.983408	T regulatory cells	CD4+ T cells
GAACCTACAAACAACA	pbmc8k	4118	1204	4118	1204	148	13	3.59398	4118	1.01191	Naive CD4 T cells	CD4+ T cells
AATCCAGAGCCACGCT	pbmc8k	4828	1515	4828	1515	97	13	2.00911	4828	1.18638	Naive CD4 T cells	CD4+ T cells
TCGAGGCGTTATGTGC	pbmc8k	6435	1889	6435	1889	1279	17	19.8757	6435	1.58127	NA	NA
ACGCCAGAGGGAGTAA	pbmc8k	5168	1594	5168	1594	103	15	1.99303	5168	1.26993	Th17 cells	CD4+ T cells
TCATTTGTCTACTATC	pbmc8k	3666	1499	3666	1499	89	12	2.42771	3666	0.900843	Non-switched memory B cells	B cells
GAAGCAGAGAGCAATT	pbmc8k	5452	1728	5452	1728	232	13	4.25532	5452	1.33972	Classical monocytes	Monocytes
AACACGTGTCTCTCTG	pbmc8k	4767	1698	4767	1698	159	12	3.33543	4767	1.17139	MAIT cells	T cells
AAATGCCGTCAAAGAT	pbmc8k	4280	1556	4280	1556	180	15	4.20561	4280	1.05172	Th1/Th17 cells	CD4+ T cells
ACTATCTGTGTCAATC	pbmc8k	4184	1604	4184	1604	156	11	3.72849	4184	1.02813	Non-Vd2 gd T cells	NK cells
TAGCCGGCACCACCAG	pbmc8k	4534	1420	4534	1420	127	12	2.80106	4534	1.11414	Naive CD4 T cells	CD4+ T cells
CAGAATCAGCGGCTTC	pbmc8k	4371	1566	4371	1566	126	12	2.88264	4371	1.07408	Non-switched memory B cells	B cells
TACTTGTTCCTTGGTC	pbmc8k	4554	1615	4554	1615	222	14	4.87484	4554	1.11905	Classical monocytes	Monocytes
GATTCAGCATTCCTCG	pbmc8k	4205	1414	4205	1414	85	13	2.0214	4205	1.03329	Naive CD4 T cells	CD4+ T cells
TCACGAAAGATCTGCT	pbmc8k	4486	1482	4486	1482	115	13	2.56353	4486	1.10234	Naive CD4 T cells	CD8+ T cells
GCAGTTATCGAACGGA	pbmc8k	4612	1410	4612	1410	116	13	2.51518	4612	1.1333	Naive CD8 T cells	CD8+ T cells
CCGTTCAGTGCTCTTC	pbmc8k	4734	1474	4734	1474	108	12	2.28137	4734	1.16328	Naive CD4 T cells	CD4+ T cells
GCGGGTTGTCATGCCG	pbmc8k	5440	1619	5440	1619	374	16	6.875	5440	1.33677	Classical monocytes	Monocytes
GCGCAGTCATTTGCTT	pbmc8k	3853	1538	3853	1538	161	12	4.17856	3853	0.946794	Naive B cells	B cells
CTGAAACAGAGGACGG	pbmc8k	4838	1437	4838	1437	187	14	3.86523	4838	1.18884	Th1/Th17 cells	CD4+ T cells
CAGCATATCAGTGTTG	pbmc8k	4170	1457	4170	1457	130	12	3.11751	4170	1.02469	Naive CD8 T cells	CD8+ T cells
GACGGCTCATTAGCCA	pbmc8k	4819	1443	4819	1443	161	12	3.34094	4819	1.18417	Naive CD8 T cells	CD8+ T cells
CCACTACAGCCCAACC	pbmc8k	5139	1778	5139	1778	279	12	5.42907	5139	1.2628	Classical monocytes	Monocytes
AAACGGGAGCCTCGTG	pbmc8k	8079	2146	8079	2146	288	12	3.5648	8079	1.98525	Myeloid dendritic cells	Dendritic cells
CTTACCGGTAAACACA	pbmc8k	4317	1454	4317	1454	131	13	3.03451	4317	1.06081	Naive CD8 T cells	CD8+ T cells
AAAGTAGTCTATCCCG	pbmc8k	4423	1654	4423	1654	183	13	4.13746	4423	1.08686	Classical monocytes	Monocytes
AGCATACCATGACGGA	pbmc8k	4854	1581	4854	1581	190	15	3.9143	4854	1.19277	Classical monocytes	Monocytes
TGGCTGGTCAGTCAGT	pbmc8k	4895	1517	4895	1517	88	12	1.79775	4895	1.20284	Naive CD4 T cells	CD4+ T cells
TTTGCGCAGACTGTAA	pbmc8k	5291	1800	5291	1800	190	13	3.591	5291	1.30015	Intermediate monocytes	Monocytes
AAGTCTGGTAAGTGTA	pbmc8k	5339	1678	5339	1678	313	15	5.86252	5339	1.31195	Classical monocytes	Monocytes
ACGCCGATCTCCCTGA	pbmc8k	4850	1530	4850	1530	130	13	2.68041	4850	1.19179	Th1/Th17 cells	CD4+ T cells
AGTCTTTTCTTCTGGC	pbmc8k	4621	1656	4621	1656	305	14	6.6003	4621	1.13551	Classical monocytes	Monocytes
ATTGGACTCTCGAGTA	pbmc8k	4611	1460	4611	1460	116	13	2.51572	4611	1.13306	Naive CD8 T cells	CD8+ T cells
AGAGCTTGTGCTAGCC	pbmc8k	5052	1431	5052	1431	162	13	3.20665	5052	1.24142	Naive CD8 T cells	CD8+ T cells
CTACATTAGAATAGGG	pbmc8k	4177	1372	4177	1372	68	13	1.62796	4177	1.02641	Naive CD4 T cells	CD4+ T cells
TACCTATAGAAGGCCT	pbmc8k	4910	1677	4910	1677	188	15	3.82892	4910	1.20653	Vd2 gd T cells	T cells
TCGAGGCCAGGCGATA	pbmc8k	5517	1496	5517	1496	93	14	1.6857	5517	1.35569	Naive CD8 T cells	CD8+ T cells
GTTAAGCGTATATGAG	pbmc8k	4589	1444	4589	1444	93	14	2.02659	4589	1.12765	Non-switched memory B cells	B cells
CGAGAAGTCATCTGTT	pbmc8k	4467	1292	4467	1292	73	12	1.63421	4467	1.09767	Naive CD4 T cells	CD4+ T cells
TCGAGGCCAAGGACTG	pbmc8k	5108	1704	5108	1704	283	17	5.54033	5108	1.25518	Intermediate monocytes	Monocytes
CGCGTTTGTCAAACTC	pbmc8k	4773	1644	4773	1644	199	14	4.16929	4773	1.17287	Vd2 gd T cells	T cells
CCTACACTCAACGGCC	pbmc8k	4447	1448	4447	1448	135	14	3.03575	4447	1.09276	Naive CD8 T cells	CD8+ T cells
TCTTTCCGTAGCGATG	pbmc8k	5237	1698	5237	1698	257	14	4.90739	5237	1.28688	Classical monocytes	Monocytes
CAACCAAGTCACTGGC	pbmc8k	4395	1348	4395	1348	150	12	3.41297	4395	1.07998	Naive CD8 T cells	CD8+ T cells
CTAATGGCAGCCAATT	pbmc8k	4642	1525	4642	1525	157	13	3.38216	4642	1.14067	Naive CD8 T cells	CD8+ T cells
AGACGTTAGTGAAGTT	pbmc8k	4405	1409	4405	1409	99	13	2.24745	4405	1.08244	Naive CD4 T cells	CD4+ T cells
CGGACGTTCCTCATTA	pbmc8k	4555	1574	4555	1574	85	11	1.86608	4555	1.1193	Th1/Th17 cells	CD4+ T cells
GAGGTGATCAGCACAT	pbmc8k	3876	1421	3876	1421	69	12	1.78019	3876	0.952446	T regulatory cells	CD4+ T cells
TCGGGACAGGTGCAAC	pbmc8k	4962	1632	4962	1632	158	14	3.1842	4962	1.21931	Th1/Th17 cells	T cells
CGTTGGGAGAAGGTGA	pbmc8k	5076	1510	5076	1510	149	12	2.93538	5076	1.24732	Th1/Th17 cells	CD4+ T cells
AGAATAGAGGCTATCT	pbmc8k	4630	1495	4630	1495	135	13	2.91577	4630	1.13773	Th2 cells	CD4+ T cells
GAACCTACATTACCTT	pbmc8k	4726	1677	4726	1677	224	14	4.73974	4726	1.16132	Classical monocytes	NA
AAATGCCTCAACACAC	pbmc8k	4713	1607	4713	1607	145	13	3.0766	4713	1.15812	Intermediate monocytes	Monocytes
AGTCTTTTCGTAGGTT	pbmc8k	5332	1733	5332	1733	164	13	3.07577	5332	1.31023	Classical monocytes	Monocytes
GGCAATTTCTGTTGAG	pbmc8k	4634	1777	4634	1777	136	13	2.93483	4634	1.13871	Terminal effector CD8 T cells	T cells
TCAGATGCAGGCTGAA	pbmc8k	5082	1628	5082	1628	121	13	2.38095	5082	1.2488	Naive CD8 T cells	CD8+ T cells
CTCGGAGTCGGCGCAT	pbmc8k	5108	1484	5108	1484	114	12	2.23179	5108	1.25518	Non-switched memory B cells	B cells
CCTATTATCGATGAGG	pbmc8k	4164	1787	4164	1787	126	14	3.02594	4164	1.02322	Natural killer cells	NK cells
CTACCCAGTCAGGACA	pbmc8k	4493	1506	4493	1506	109	13	2.426	4493	1.10406	Vd2 gd T cells	T cells
TCAACGAGTGCTAGCC	pbmc8k	4713	1664	4713	1664	214	14	4.54063	4713	1.15812	Classical monocytes	Monocytes
CCCAGTTAGAAACCTA	pbmc8k	4138	1411	4138	1411	108	14	2.60996	4138	1.01683	T regulatory cells	CD4+ T cells
CGTCTACGTAATTGGA	pbmc8k	4652	1478	4652	1478	93	11	1.99914	4652	1.14313	Follicular helper T cells	CD4+ T cells
GTACTCCTCTTAACCT	pbmc8k	4233	1500	4233	1500	107	12	2.52776	4233	1.04017	MAIT cells	T cells
GCTGGGTAGTCGTACT	pbmc8k	5026	1417	5026	1417	123	12	2.44727	5026	1.23503	Naive CD8 T cells	CD8+ T cells
TTTGGTTGTGTAATGA	pbmc8k	4893	1694	4893	1694	212	13	4.33272	4893	1.20235	Classical monocytes	Monocytes
ACATACGCATATGGTC	pbmc8k	4042	1370	4042	1370	71	13	1.75656	4042	0.993237	Naive CD4 T cells	CD4+ T cells
CCTCAGTTCTGAGGGA	pbmc8k	4950	1439	4950	1439	132	13	2.66667	4950	1.21636	Naive CD8 T cells	CD8+ T cells
CATGCCTTCGATAGAA	pbmc8k	4126	1364	4126	1364	50	12	1.21183	4126	1.01388	Naive B cells	B cells
ACTATCTAGACTAAGT	pbmc8k	3751	1550	3751	1550	109	13	2.90589	3751	0.92173	T regulatory cells	CD4+ T cells
ACGAGCCCACGGTGTC	pbmc8k	4848	1609	4848	1609	145	11	2.99092	4848	1.19129	Th1/Th17 cells	CD4+ T cells
CGAGCACAGGCTCATT	pbmc8k	5130	1754	5130	1754	330	13	6.43275	5130	1.26059	Classical monocytes	Monocytes
CTGATCCAGAAGGCCT	pbmc8k	4764	1344	4764	1344	114	12	2.39295	4764	1.17065	Naive CD8 T cells	CD8+ T cells
ACCCACTAGAGTGACC	pbmc8k	4461	1619	4461	1619	82	14	1.83815	4461	1.0962	Th17 cells	CD4+ T cells
ATTACTCAGCTGATAA	pbmc8k	4506	1612	4506	1612	200	14	4.43853	4506	1.10726	NA	NA
ACATACGTCTCTTGAT	pbmc8k	3739	1362	3739	1362	118	12	3.15592	3739	0.918781	Naive CD8 T cells	CD8+ T cells
AACTCTTCACTATCTT	pbmc8k	4196	1548	4196	1548	88	14	2.09724	4196	1.03108	Th1/Th17 cells	CD4+ T cells
[truncated: 6,366 more rows]

## Sheet: B. MSC clusters
B. Multi-scale clusters identified MSC in .GMT format.
M1	ACTTACTCAAGTAATG	CCTCAGTTCTGACCTC	ACGGGTCTCTTTAGGG	TCAATCTTCAGCTTAG	AACTCAGTCCTTTCTC	TCATTACGTACACCGC
M2	AGGTCCGAGCTAACTC	AGCTTGACAACTGCTA	CTCGAAACACTGTGTA	CTAACTTAGACTTTCG	TATGCCCTCTCATTCA	CCTAAAGCAGGTTTCA	AGCAGCCGTTTGGCGC	ACGGGCTCAGTCAGAG	TTAGGACCAGGGCATA	AGCGTATAGAAACGAG	CCTAGCTAGTTTGCGT	GTCCTCATCAGTTGAC	GTGCAGCCACTTACGA	ATGAGGGAGACCCACC	TAGGCATAGGTGCACA	CATCAAGCATGCCACG	CACAAACGTTAAAGTG	CTTAGGATCTCCCTGA	TGCGGGTGTACCAGTT	TCAGCTCTCCTGCAGG	ACCCACTAGATCGATA	CCTTCCCTCATCTGTT	ACTGATGGTACGAAAT	GAATAAGAGTCCATAC	GAATGAACAAATCCGT	GCAATCACATGGATGG	CCAATCCAGAAACCAT	CGGGTCAAGTATCGAA	CTCTACGTCGGTTAAC	TTGGAACAGACTTTCG	GGGTCTGGTGATAAAC	GGGTCTGCAGACACTT	GGCGTGTCATCCGTGG	ACTTGTTCATCCTTGC	GATTCAGTCCCAAGTA	GGGAGATTCGCGGATC	CTCTAATCAGGATCGA	TAGGCATAGTCAAGGC	ACCCACTTCAGTCAGT	AGGGTGACACCAACCG	GAGTCCGCATTAGCCA	GTCGGGTTCAAGGCTT	TGAAAGACAGACAGGT	AGGCCACTCATCTGCC	CGAACATGTGCAGTAG	AGTGAGGCACAGGTTT	GTTCGGGAGTAAGTAC	TCTGAGATCTTATCTG	TATTACCCACAAGTAA
M3	TTTATGCTCCTACAGA	TGGCGCAGTTCTGGTA
M4	GAGTCCGCAGCCACCA	TTCGAAGGTATAATGG
M5	GAACCTAAGGTTACCT	ATCACGATCGCATGAT
M6	GTTCGGGTCGTCCAGG	AGCCTAACATGCCCGA	ATAACGCGTCTGCAAT	GTTAAGCCAATGGTCT	TCAGGATAGTAGGCCA	TCAGGTAAGCGTTCCG	CACACCTTCTCTGCTG	TCAGCTCCATTGGGCC	AATCGGTGTCCATGAT
M7	TATCTCACATGCATGT	GTCACAATCAAACCGT
M8	ATCTGCCTCACCCGAG	CCCTCCTAGTCGCCGT
M9	CTTAACTCATACAGCT	TTAGGACAGATATGGT	TCAGGATGTGACGCCT
M10	CGCTATCTCTTTAGTC	CTGGTCTCAACTTGAC
M11	CATATTCAGCAGGCTA	CGTCCATGTTGGTAAA
M12	AAAGATGAGCGCTCCA	AGTGAGGTCACTTCAT
M13	AGGTCCGAGCTAACTC	CTAACTTAGACTTTCG	CCTTCCCTCATCTGTT	TTTGCGCCACCATCCT	AACCGCGGTCCTAGCG	AACTTTCGTAGAGCTG	TTAGGCATCATGCAAC	TGGACGCGTGTCCTCT	ATTACTCCAACGATCT	AGACGTTAGCGATTCT	AGAGCGAAGTGAACGC	TGATTTCTCTGATTCT	TGCCCATTCTCCCTGA	CATATGGAGAACAACT	CATGACACAAGCCGCT	CGTCACTGTGATAAGT	GGCTCGACATTAGGCT	CAGCTAACATGCAACT	GTTCTCGCACAGATTC	CCGTACTGTACCGGCT	CAGCAGCAGGTGCACA	GGGAGATCACATCCGG	GCGAGAATCGCTTGTC	TGCGCAGCATCGACGC	ACGGCCAAGGTACTCT	CTTAACTCAGTGGGAT	GTGCATAGTAGTACCT	AAAGCAATCCCTGACT	ACTGATGAGCTAGTCT	TAAGTGCTCACCCGAG	CATGCCTGTGCCTGTG	CCATGTCAGGCGTACA	AGAGCTTCATGTCTCC	TGACGGCGTTCAGTAC	ATCATCTAGTGAACGC	CTCGTCACAAAGGTGC	TGCACCTTCAGCTGGC	AGCGTATCACATAACC	AACTCCCTCTGGGCCA	AGCTTGACATTCCTCG	CACCTTGAGCAGACTG	AAAGCAAAGCCCTAAT	AGGGTGAAGTGGGATC	TCCACACCAATAAGCA	TGAGCATTCGACCAGC	ACATGGTAGATATGGT	ACTTGTTCACCAGATT	CCTTCCCTCACGAAGG	GTGCATACAAAGAATC
M14	ACGGGCTCAGTCAGAG	CCTAGCTAGTTTGCGT	TAGGCATAGTCAAGGC	AGGCCACTCATCTGCC	TATTACCCACAAGTAA	CGTCCATTCCACTGGG	AAACGGGTCTTCTGGC	CTGCGGACAGATAATG	GGCCGATAGGCTAGGT	CTACATTTCACTCTTA	TGCACCTTCCACGTGG	ACATACGGTTCTGAAC	GCGCAACCATGACGGA	GCGCAGTTCTCGTTTA	AACTCAGTCGCTTGTC	CGGACACTCCCTCAGT	ACCGTAAGTTATCGGT	TCTATTGCATCCGTGG	AGGTCATGTCAAAGAT	AAGGTTCAGTGGGCTA	AGTAGTCAGCAATATG	CTCGGGAGTTAAAGAC	TGGGCGTCAGCTGTTA	AGTGGGACATCCGGGT	CGTCAGGCACTGTCGG	TGCCCTATCTTCAACT	TGGGCGTTCCTAGTGA	GTGCATAGTTCCGGCA	GCGCCAAGTTCGCTAA	AGAATAGCAATTCCTT	TGTGGTATCTGATTCT	GTCACAACATACTCTT	TGAGAGGAGATGTAAC	TGGCGCATCGTCGTTC	CTTAACTTCTGCGGCA	CCCATACGTGAGGGAG	CGGAGCTCAAACCCAT	GTGCATATCCTTTACA	GAGTCCGGTCTGCCAG	GACGGCTCATCACGAT	CATTATCCAGTTCATG	GGACGTCGTAGAAAGG	CTGGTCTAGAGAGCTC	TCACAAGAGTCGCCGT	TGCTGCTTCGGCCGAT	ATCACGAGTCCATCCT	TGCCCTAAGTACATGA	TATGCCCTCAGGATCT	TAAGAGAAGCTGAACG
M15	GTCACGGGTCCATCCT	AAGTCTGGTTCCGTCT	GCGACCACAGGCAGTA	GGAAAGCAGCTATGCT	CTGGTCTCAAAGCAAT	CGACCTTCATCTGGTA	CTGAAGTAGGCTACGA	GGGAGATCAGTGACAG	CCTTTCTCACATAACC	GACTAACGTTGTGGCC	CCCAATCCATTTCACT	CAGTCCTCAATGGATA	TAGTGGTGTGCATCTA	CAGAATCGTATCGCAT	GAATGAACATGCTAGT	TCAGGATAGAGTTGGC	CGTAGGCAGCTCCCAG	CGCGGTAAGAAACCAT	ACGGAGATCAGCGATT	CTAGAGTCACTTCGAA	CTCTAATGTGTAATGA	GTCACGGTCAGTTGAC	TCGGGACTCTGTACGA	AAGGCAGGTATGAAAC	GATGCTATCATACGGT	GGAATAAGTATGAATG	AACCATGCATATGAGA	ACCCACTCAGGAATGC	GGATGTTAGGGAGTAA	ATCTACTAGGCTCAGA	CTTAACTTCGTGGGAA	GGATGTTGTAGCGATG	ACTGCTCGTGTGACCC	AACTTTCCACGTGAGA	GACAGAGAGACGCAAC	CCTTCGACAACAACCT	TCGGTAAGTGTAAGTA	GGAACTTTCAGCTCGG	CCGGTAGAGCTTATCG	GGACGTCGTGACCAAG	GTGCAGCAGACTGTAA	GAACCTATCGCCTGTT	CGGTTAAGTGGTCCGT	GATCTAGGTGCAACTT	AATCGGTCAATCGGTT	TTTATGCCATGACATC	TTGGCAATCTTACCTA	AACTCTTTCAATCACG	CCAGCGAAGTCACGCC
M16	AGCTTGACAACTGCTA	CTCGAAACACTGTGTA	AGCAGCCGTTTGGCGC	GTCCTCATCAGTTGAC	GAATAAGAGTCCATAC	CCAATCCAGAAACCAT	CGGGTCAAGTATCGAA	GGGTCTGGTGATAAAC	GTTCGGGAGTAAGTAC	ACGGGCTTCTTTACGT	AACTCTTGTCATATGC	TCAACGAGTGCAGACA	ATTATCCGTAGAAAGG	ACGTCAAGTGGAAAGA	CATCAAGGTCGACTGC	AACTGGTTCACTTATC	GAATAAGCACGTGAGA	CCTTACGTCAATCTCT	CATCGGGTCACATGCA	CCGGTAGTCGTCTGAA	CTCGAGGTCCTGTACC	GCTCTGTCATTTCAGG	GTAGTCAGTACGACCC	GCGCCAACAACTTGAC	CTGAAACTCCCTTGCA	TTCTCAATCATCGGAT	GCTGCAGAGCCAGGAT	GATTCAGCACAGGCCT	ACGGAGAGTGGCTCCA	GAATGAATCAGCATGT	CACCACTCATGTCCTC	TGGCGCAAGTACCGGA	GCTGCTTCAAGTCATC	CAAGAAACACATGTGT	TGCCCATAGGGATACC	CGTCACTAGGAGTAGA	GACCAATTCTCTGTCG	GTATCTTGTGAACCTT	GTGTGCGGTCTCCACT	AGATTGCCACCCATTC	TCGCGTTCAGTTCCCT	ATCACGAGTACCGGCT	CACACAAGTAAGGGAA	CATGCCTTCAGCTCGG	CTGTTTAAGTCACGCC	GATCGCGGTGAAAGAG	GCAATCAGTATTACCG	CATGACATCTGTCTCG	GCATGATCAGGTCCAC
M17	TATGCCCTCTCATTCA	TGCGGGTGTACCAGTT	TCAGCTCTCCTGCAGG	ACCCACTAGATCGATA	ACTGATGGTACGAAAT	GAATGAACAAATCCGT	GCAATCACATGGATGG	GATTCAGTCCCAAGTA	GGGAGATTCGCGGATC	CGAACATGTGCAGTAG	AGTGAGGCACAGGTTT	AAGTCTGAGGCACATG	AGAATAGGTAGCAAAT	TCACAAGTCACATAGC	ATGCGATGTCACAAGG	GCAGCCAAGTCCGTAT	CTCTAATGTGTGAAAT	GATGCTAAGAAGGACA	GGTGTTAAGTGAAGTT	AATCCAGCAGAGCCAA	GGACAAGAGCATGGCA	ACTGAGTCAACACCTA	CAACCAAGTCAAACTC	GGAGCAAGTCGCTTCT	GTATCTTTCAGGATCT	GCTCCTACAGGTCTCG	TTAGGCAGTTATGTGC	GGACATTCATGGATGG	ACGAGGAGTGCTAGCC	GATCGATCACAACGCC	GTGTGCGCATGCCACG	CGGTTAATCCATGAGT	CGGACGTAGTGGGCTA	CTCTACGTCGTCGTTC	GTTAAGCGTACCTACA	CTGATAGTCACCCGAG	TACGGATAGTGCCATT	TCAGATGAGCCGATTT	AAAGCAAAGTGTCTCA	TGCGGGTAGACAGAGA	ACGTCAATCCCGGATG	TACGGGCCACGTCAGC	CGCGGTATCTGCAAGT	ATCGAGTTCAGGCAAG	GAGGTGAGTTCAGGCC	CTTTGCGCAGCGATCC	TTAACTCGTCTACCTC	TGCGCAGCATCCTTGC	GAAACTCTCTATCCCG
M18	CCTAAAGCAGGTTTCA	AGCGTATAGAAACGAG	CATCAAGCATGCCACG	TGCCAAATCCAGTAGT	AGCCTAAGTATATGAG	TTCTACACACGTAAGG	TACCTATGTATCAGTC	CTGTGCTGTATGGTTC	GTGTTAGAGACAGACC	TACTTGTGTTAAGGGC	TTTGGTTTCAGCGATT	ATGCGATCACGTTGGC	AACCGCGTCTCGCATC	ACTATCTTCAGATAAG	TTCTCCTAGTCAATAG	TCATTACAGTTACGGG	GTGTGCGAGTCGAGTG	CTAACTTAGCTTATCG	CGCGTTTTCGCTGATA	CCACGGAGTTAGGGTG	TCATTTGAGATGAGAG	CAAGATCGTCAACTGT	ACGCAGCCAACACCTA	GATCGTAAGGCCCTTG	TCAACGACAGTGACAG	TAAGAGATCAAAGTAG	AAATGCCGTAAATGTG	TCAGATGGTATATGAG	ACTTGTTAGGATTCGG	CTCCTAGGTGAGTGAC	GCATGATCACTACAGT	CGAACATGTCTTGATG	TCCCGATTCCAAACTG	ATTTCTGCATTTGCTT	ATCATGGGTACAGCAG	CACTCCAGTCGCGGTT	AGGGATGCAAGGTTCT	CAGAATCTCTTCGGTC	GGCGACTGTGAGTATA	GTTCGGGAGCCATCGC	CATATGGCAGGGTATG	TTTGGTTTCCAAGCCG	CTAACTTGTCTCGTTC	CTGCGGACATCCCACT	ATCATGGTCCACGAAT	AAGGCAGGTATATGGA	TGCGGGTTCCTCATTA	AGGCCACGTACATCCA	TGAAAGAGTCCCTACT
M19	TTAGGACCAGGGCATA	GTGCAGCCACTTACGA	CTCTACGTCGGTTAAC	GGGTCTGCAGACACTT	GGCGTGTCATCCGTGG	ACTGAACCAACTGGCC	AGCTCCTGTTCGGGCT	TTCGAAGTCTGGTTCC	TCTCATATCTTGACGA	GACGTTAAGACACTAA	CATCGAAAGGCGCTCT	ATTTCTGTCCGAATGT	CCGTTCAAGGTAGCTG	CATATGGAGTGTTAGA	ATCTGCCAGGTAGCTG	CGCGGTAAGCAAATCA	AGGCCACAGCCTCGTG	GAGCAGATCAAGGCTT	AACTCTTTCTCATTCA	GTTACAGTCCAGGGCT	AGGTCCGAGCTACCTA	GGGCATCGTCGCATAT	AGTGAGGCACGCTTTC	TGACTAGTCCTCAATT	CGATCGGCACACCGCA	CTCACACGTACTTAGC	GCCAAATAGATAGTCA	GCTCTGTGTGTGACGA	CCTACCAGTATCGCAT	GCAATCACAATGTTGC	AGTGTCAAGACGACGT	AAGTCTGAGCTAGTTC	TATTACCCAATAGCGG	ACTATCTCATCTATGG	TACTCGCAGCTCCCAG	CAGAGAGGTAAGTAGT	TGACAACAGGGATGGG	CTAGCCTGTCATATGC	TTCGAAGGTCGGGTCT	AAGGAGCGTCTTCAAG	AGAGTGGCAGGTGCCT	GGAACTTGTACTCAAC	TTTACTGTCGTGGTCG	GCTGCTTCACCGTTGG	GCGACCAGTGCGATAG	AGAGTGGCAAGCCCAC	GACTGCGCAAGTTCTG	GTGGGTCAGCTAGTCT	CGGACGTCACCTGGTG
M20	ATGAGGGAGACCCACC	TAGGCATAGGTGCACA	TTGGAACAGACTTTCG	CTGCCTAAGAAACGCC	CTCGTACAGAAACCTA	GCTTGAAGTACCGTTA	TGGGCGTGTTATTCTC	CTACATTCAAGACGTG	TTTCCTCAGTGCGATG	GTGCGGTCAGTCGATT	ACATACGTCTCGCTTG	TTCTCAAGTACTTCTT	ACAGCTAGTGCGAAAC	TTCTTAGTCGCTTGTC	CCTACACGTCTAAAGA	CACAAACTCCGGCACA	GAATGAACATATGGTC	TACTTGTCATCAGTCA	CCTAGCTAGTGTACGG	ACGGAGACACCACCAG	GTTCATTAGGCTATCT	AACTGGTAGTACGCCC	GTATCTTGTCTCTTTA	GTGCGGTGTGATGTCT	GTTTCTAAGGTGATTA	CTCGGAGAGACAAAGG	TACACGACAAGTAATG	TAGGCATTCCTTGACC	ACTGAGTAGTATCGAA	ACTTGTTAGACTTGAA	CCTAGCTCACCTCGTT	ACCAGTAGTGCTGTAT	CCTACACGTTCGAATC	GCTGCAGTCGGAGGTA	TGTTCCGTCGAATGGG	TGACGGCGTACCGAGA	CCGTACTTCATAACCG	ACTGAACTCCACTGGG	ATCATGGCAATGGATA	CTAAGACTCCGTAGGC	TGAGAGGAGAAGCCCA	ACGCCGACATTGGGCC	GATCTAGAGCCCAACC	GTTACAGCAGGATTGG	GCTCCTACAGCGTAAG	CCCATACGTCCGTCAG	ACACTGAGTCACTTCC	CTAACTTTCGAGGTAG	AGCCTAAAGTCGATAA
M21	CACAAACGTTAAAGTG	ACCCACTTCAGTCAGT	AGGGTGACACCAACCG	AAGACCTAGCACAGGT	CTACGTCGTTGTCGCG	TATTACCCAGCGAACA	TTAGGCATCCAAACAC	AGGTCATTCATTGCGA	GAACGGAGTAGAAAGG	ATGCGATCAATGGAAT	TAAACCGGTTCCACGG	GGCCGATGTTGAACTC	CAGATCACAATGTTGC	CCATTCGAGATGCCAG	TATTACCAGGTGTTAA	CAGCTAATCAGCACAT	TACTTGTTCCTCCTAG	GAACCTAGTATAGGTA	TGCGGGTAGACTTGAA	TTCTCCTGTTACAGAA	TTAACTCTCCTAGGGC	ATCTACTAGTTTCCTT	AGATTGCTCTTCGAGA	TGGGCGTGTCTTCGTC	ACTGAGTGTTACTGAC	ACATGGTAGACTAGGC	AGTTGGTGTCCGAAGA	CATTATCAGTCTTGCA	TCTCTAAGTAGCAAAT	ACGATGTGTCAGTGGA	TCGTACCCATGCAATC	GACGCGTAGTTAACGA	CAGCTGGGTCGGCACT	CTGCCTACAACACCTA	GTACTTTCACCGAAAG	AGTTGGTTCCGTAGTA	CATCCACTCATTGCCC	TCTTCGGAGTTTCCTT	GCTCTGTCACAACTGT	TGACTTTGTTTAGCTG	CCTAGCTCAATCGGTT	TACGGTAAGGCATGGT	TCAGCTCGTCAGATAA	TACGGGCGTCTCACCT	ACTTGTTAGAGACTAT	CACCTTGGTGTGGCTC	ATTTCTGCATGCGCAC	TAGACCACACGGTGTC	GCATGTACAGGCTGAA
M22	CTTAGGATCTCCCTGA	GAGTCCGCATTAGCCA	TGAAAGACAGACAGGT	GCTGCAGCAAAGTCAA	ATTATCCCAAGTAATG	AGTGAGGCAACTGCTA	TAAACCGTCCTCTAGC	GGACAAGGTTCGCTAA	TAGTTGGAGAAACCTA	GCGCAGTTCGAGGTAG	ATAGACCCAGCTGTTA	TTGTAGGAGGTGATAT	GATCGTACACCGAAAG	TCGGTAAAGGAGTTGC	GGTATTGAGTGGGTTG	TGTCCCAGTGCACCAC	TTTGCGCGTAAATGAC	AACTCAGCAAGAAAGG	TCAGATGCACTCAGGC	GGAATAAGTAGTACCT	CACCAGGCAGTCTTCC	CGATGTAAGCTAGTGG	CCGGTAGGTTGAGTTC	AGCGTCGGTCCAAGTT	GCAGCCACAAAGAATC	AGTGTCATCTGCGTAA	GGCAATTCACGGCGTT	ACCCACTTCCCTGACT	AAACCTGAGCATCATC	CGCTATCGTCAGAGGT	GTCTTCGAGCAGCCTC	CGAACATGTAAGTTCC	CGATGTAAGAAACCAT	TCTCTAACAGGCTCAC	CACAAACCACTGTGTA	GGAACTTTCAATCTCT	GGTATTGGTGGTCTCG	TCGGGACTCTGCCCTA	CATCCACGTCGCTTCT	GCATGCGGTTATGCGT	TGCCAAAGTCTTGTCC	TTGGCAAGTGTTAAGA	GGTGCGTCACTCGACG	CTAATGGCAATGAAAC	ACGCAGCGTTAAAGAC	CTCTGGTCATGGTCAT	ACCTTTATCCAAGCCG	TTATGCTAGTCTCAAC	TGAGCATTCTGAAAGA
M23	ACTTGTTCATCCTTGC	CTCTAATCAGGATCGA	GTCGGGTTCAAGGCTT	TCTGAGATCTTATCTG	TCGAGGCGTTATGTGC	ATCGAGTTCGGACAAG	TATCAGGTCGAGAGCA	TCTATTGTCGATGAGG	CTAAGACGTTAGTGGG	CATGACATCTCCTATA	GACCAATGTCTTGTCC	GCTGCGACAGGCTCAC	GTACTTTCATACTACG	TCAGGATAGTCCTCCT	TTCCCAGGTAAGTGTA	AAGGTTCGTGGTGTAG	GAGTCCGTCCGATATG	AGAGCTTTCATGTAGC	TCAACGAGTGTTCGAT	GGAACTTCAACGATCT	CTGAAGTCATGTTCCC	ACGGCCACACGAGGTA	CAGAATCCATCGGGTC	GACGTGCGTTCTGTTT	AAGACCTAGTGGCACA	GGAGCAACAGGCAGTA	TGACAACTCCGGGTGT	AACTCCCAGGTGATTA	ACGATGTAGCAGACTG	ATCGAGTTCGGTGTTA	TTAGTTCCAAGGACAC	ATTACTCCACGAGAGT	ACCAGTAGTTGCGTTA	CATCGGGTCCGCAGTG	TTCCCAGAGTACGACG	GCAGCCAAGTTAAGTG	GGTGAAGTCACCCTCA	AGGGAGTGTAATAGCA	AGGGTGACACTACAGT	CACATAGAGTAATCCC	TGATTTCAGCAATATG	GCTCTGTCAAGAGTCG	TTGAACGCATCCCATC	CGTTGGGAGAGCCTAG	AGTCTTTTCTTCTGGC	TTCTACAGTATGAAAC	AACTGGTCAGTCCTTC	GCGCAGTGTGCGCTTG	TTGCCGTGTCTCTTTA
M24	AGGTCCGAGCTAACTC	CTAACTTAGACTTTCG	CCTTCCCTCATCTGTT	TTTGCGCCACCATCCT	AACTTTCGTAGAGCTG	TTAGGCATCATGCAAC	TGGACGCGTGTCCTCT	AGACGTTAGCGATTCT	AGAGCGAAGTGAACGC	TGATTTCTCTGATTCT	TGCCCATTCTCCCTGA	CATGACACAAGCCGCT	CGTCACTGTGATAAGT	GGCTCGACATTAGGCT	CAGCTAACATGCAACT	CAGCAGCAGGTGCACA	GGGAGATCACATCCGG	GCGAGAATCGCTTGTC	CTTAACTCAGTGGGAT	GTGCATAGTAGTACCT	AAAGCAATCCCTGACT	ACTGATGAGCTAGTCT	CCATGTCAGGCGTACA	AGAGCTTCATGTCTCC	TGACGGCGTTCAGTAC	ATCATCTAGTGAACGC	CTCGTCACAAAGGTGC	TGCACCTTCAGCTGGC	AGCGTATCACATAACC	AACTCCCTCTGGGCCA	TGAGCATTCGACCAGC	ACATGGTAGATATGGT	AGCGTCGAGTTCGCAT	ACGCCAGGTGGTAACG	TTCTTAGAGCGTGAAC	ACGCAGCGTGTGACCC	ACGTCAACACGTGAGA	TGACAACTCTACTCAT	CACATTTCAGATTGCT	TCTCATACAGAAGCAC	TTCGAAGCACGCCAGT	CAGCCGATCATTATCC	CTCGTCACAATAGCAA	ACACTGAGTTAGGGTG	TCGTAGATCGGTGTTA	CCTCAGTAGTCCATAC	GTTCGGGAGCAGCGTA	AGATCTGCAACTGCTA	CTTAGGATCCACTCCA
M25	AACCGCGGTCCTAGCG	ATTACTCCAACGATCT	CATATGGAGAACAACT	GTTCTCGCACAGATTC	CCGTACTGTACCGGCT	TGCGCAGCATCGACGC	ACGGCCAAGGTACTCT	TAAGTGCTCACCCGAG	CATGCCTGTGCCTGTG	AGCTTGACATTCCTCG	CACCTTGAGCAGACTG	AAAGCAAAGCCCTAAT	AGGGTGAAGTGGGATC	TCCACACCAATAAGCA	ACTTGTTCACCAGATT	CCTTCCCTCACGAAGG	GTGCATACAAAGAATC	AGGTCATTCGGATGGA	CTGGTCTGTTGTCTTT	CGAGCCATCTTACCTA	TTGAACGGTCTAGGTT	CTAACTTAGTGTACGG	TACTTGTTCTCGTATT	TTGCCGTGTGGCAAAC	GTCATTTGTCCAGTTA	TACTTGTCATACAGCT	ACTATCTAGACTAAGT	ACTGAACAGACCTAGG	GAGGTGAAGATCACGG	TTTATGCAGCGATGAC	TTGCCGTTCCCAGGTG	TTGAACGGTGAACCTT	CGGCTAGTCACCTCGT	GGGTTGCTCTATCCTA	CTTGGCTGTTAAGTAG	CATATGGTCTTGTCAT	AGCTTGAGTGACGGTA	CTACACCTCTTGACGA	CCAGCGACAAAGTGCG	TGAAAGAGTGTATGGG	CTGAAACGTGGTGTAG	ACGTCAAAGTTATCGC	TGCTACCCAAGGCTCC	CGGGTCATCATCACCC	GGGAGATAGAGGACGG	CCTACCAGTTTAAGCC	GCCAAATCACGAAGCA	TGACTAGAGCAGATCG	TGACAACAGGAGTAGA
M26	ACGGGCTCAGTCAGAG	AGGCCACTCATCTGCC	CGTCCATTCCACTGGG	AAACGGGTCTTCTGGC	CTGCGGACAGATAATG	GGCCGATAGGCTAGGT	AACTCAGTCGCTTGTC	AGAATAGCAATTCCTT	TGTGGTATCTGATTCT	CGGAGCTCAAACCCAT	GATGAAACAGACGCTC	GCGCAGTCAGTTCCCT	CGTCAGGGTCTCTTTA	TCTTTCCGTTTCGCTC	CTGAAGTTCCCATTTA	GTCGGGTAGACAAAGG	CTAATGGGTCCGTTAA	GCAAACTCAAGGCTCC	GAATGAAGTTGCGCAC	TGGGAAGAGTGTACCT
M27	CCTAGCTAGTTTGCGT	CTACATTTCACTCTTA	TGCACCTTCCACGTGG	TCTATTGCATCCGTGG	CTCGGGAGTTAAAGAC	TGGGCGTTCCTAGTGA	GCGCCAAGTTCGCTAA	GGACGTCGTAGAAAGG	TGCTGCTTCGGCCGAT	TAAGAGAAGCTGAACG	ACGCAGCGTTCAACCA	CTACGTCTCCCAACGG	TATTACCAGTCAAGGC	TCCCGATAGCTGATAA	GAATGAATCTTGAGAC	GTGCAGCGTGTGAATA	TCTCTAACACGCCAGT	TGCACCTAGCTCCCAG	CTACACCAGCACCGCT	CTTTGCGAGCATCATC	TTAGTTCGTTGACGTT	TCGGTAAAGGTCATCT	CACTCCAAGAGCTTCT	GGATGTTTCAACGGGA	TGCACCTAGATCCCAT	GTCACAACAACGATGG	CACCACTAGAGGACGG	CGGACACAGTACGTTC	TAGTTGGGTTACGTCA	GGACGTCTCGACCAGC	TGGCTGGTCGTCCAGG	GCCTCTAGTGCATCTA	AAGTCTGTCAAGATCC	TACTCATGTCAGCTAT	CCATTCGAGTAATCCC	ATCACGATCCACGTGG	TACCTTATCTAACGGT	CCCTCCTAGGCGCTCT	AGCTCTCGTGCCTGCA	TCAACGATCTGGTATG	GCGCCAAAGCTGCGAA	ACACCCTAGCCGGTAA	GGGAGATAGTGGGATC	GAGCAGAAGTTTAGGA	GTGCAGCCATCTGGTA	GCAGCCACATCCGCGA	CTTGGCTCACTAAGTC	CCTTCGAAGTCCAGGA	CATTCGCAGCTAACAA
M28	TAGGCATAGTCAAGGC	TATTACCCACAAGTAA	GCGCAACCATGACGGA	AAGGTTCAGTGGGCTA	CTTAACTTCTGCGGCA	CTGGTCTAGAGAGCTC	ATCACGAGTCCATCCT	TGCCCTAAGTACATGA	TGAGAGGAGGTGTGGT	CCGTTCATCACCACCT	ACCTTTAAGACTTGAA	CCCTCCTAGACTGGGT	TACCTTAAGATGCCTT	GTACGTACAATCCGAT	GGAACTTTCGCCATAA	GACGCGTGTGCACTTA	CGACCTTCACGTTGGC	ATGTGTGAGCCCAGCT	GACACGCAGGCATTGG	TTTGCGCTCGCTTAGA	CACACCTAGGCCGAAT	CATCGGGCAAGAAGAG	GCTCCTAGTCACTGGC	AACTCAGGTTACGTCA	TTCTCCTGTGGAAAGA	AAGGAGCGTGTTCGAT	TTGCGTCCAAGACACG	CCTACACCAGTTCCCT	CTCGGAGGTAACGCGA	GGATGTTAGAGGTACC	CGCGGTACAGTACACT	GTACGTACAAGCCATT	TCTCTAACAGCTTCGG	GCATACACAGATGAGC	GCGAGAAAGACTAAGT	GTGGGTCTCTACTTAC	GCGCCAATCATTGCGA	CATCAAGAGCCACCTG	AGTGTCAGTTAAAGTG	CAGCATAGTACGAAAT	GGGTTGCTCAGCATGT	GCGCGATCAGCTGCAC	GGTGAAGAGACTCGGA	GGACAGAAGTCGTACT	CAGCTGGGTCGTTGTA	AAGGCAGCATAAAGGT	GACACGCTCGTTTATC	CAACTAGCAAGCGATG	GAATGAATCCAAGTAC
M29	ACATACGGTTCTGAAC	GCGCAGTTCTCGTTTA	GAGTCCGGTCTGCCAG	TCACAAGAGTCGCCGT	AGAGCTTAGCTGTCTA	ACGTCAACAAGTTCTG	AGGGATGTCTTCGGTC	TGTATTCTCTATCCTA	CGTTCTGAGTAGCGGT	TGGACGCTCGCATGGC	GTGCTTCGTGTTTGTG	CTCGAGGTCGCCAGCA	TGTTCCGAGTATCTCG	TACGGTACAGCGATCC	GCATGTATCACCGGGT	TACGGTAAGTGGGTTG	GTCTCGTGTATTACCG	ATTGGTGTCGTACCGG	TGCCCTAGTATTCGTG	GTAACTGAGAAGGTGA	ACGGAGACATTATCTC	CATCAGATCATGCATG	TTTGCGCAGAGTGACC	TGCTACCCAGCTCGAC	AAAGTAGAGCAATCTC	CTAAGACTCCACGTTC	CGGACACTCGCCCTTA	TAGCCGGAGTAATCCC	CGATGTAGTATCAGTC	ACGGGCTCAAACCCAT	TAGGCATGTCATGCAT	TTCGAAGAGCTACCGC	GTACTCCCACCGCTAG	AGCGGTCCACAGTCGC	GTGTTAGTCGTTGCCT	CGACCTTAGCCTTGAT	AGCTTGATCCTCCTAG	ACAGCTATCTGTTGAG	ATCCACCAGCGGATCA	ATTCTACCAAGAGGCT	TGTGTTTTCTGTGCAA	CCTTTCTAGCCAGTTT	TAGTTGGTCTCAACTT	AACTCAGGTATAGGGC	CTCTAATGTTGAGTTC	CCTACCATCCTCCTAG	CACACCTCAGAAGCAC	AGTGTCAGTTCAGACT	CTGAAGTCATCATCCC
M30	CGGACACTCCCTCAGT	ACCGTAAGTTATCGGT	AGGTCATGTCAAAGAT	AGTAGTCAGCAATATG	GTCACAACATACTCTT	GACGGCTCATCACGAT	TATGCCCTCAGGATCT	CGTGTAAAGACTACAA	TTATGCTCATAAGACA	TCATTACGTTATCCGA	TAAGAGACATGACGGA	TCTGGAATCATGTCCC	CCCATACGTGTTCGAT	ATGAGGGAGGACTGGT	CATCGAACATTTGCTT	TCGGGACGTTAGATGA	CCGTTCAAGAGAACAG	TCAGCTCTCAGAAATG	TTCGGTCGTATTCTCT	TTATGCTCAAGAAAGG	CCGTTCATCTTCTGGC	CTCGAAAAGGCCCGTT	GAAACTCTCCAGATCA	CGAGCCAGTAGCCTCG	TGTGGTAAGATGCGAC	GCACATATCGTTTGCC	GTTCATTTCAGCATGT	GGGTTGCTCAGGTAAA	AAGACCTCATAAGACA	TGGTTAGTCAAAGACA	AAGGTTCTCTGTACGA	GTGCATATCACGAAGG	CACCAGGGTTCGCGAC	ACGCCAGGTGCGATAG	ACGGCCACAATCTGCA	GTACTCCAGAGGACGG	ACTTTCATCACTGGGC	GGAACTTTCTGTCTCG	CGGACGTTCGCGGATC	ATTTCTGGTGAACCTT	GAGTCCGAGAGCAATT	CACAGGCCACCAGGTC	CGGTTAATCCCTAATT	CGTTGGGAGAAACCTA	GGCTGGTGTGCGAAAC	GTTAAGCAGCCAGAAC	TCGTAGACAGGTTTCA	ACGAGGACAATCTACG	CGGAGTCTCATGCATG
M31	TGGGCGTCAGCTGTTA	AGTGGGACATCCGGGT	CGTCAGGCACTGTCGG	TGCCCTATCTTCAACT	GTGCATAGTTCCGGCA	TGAGAGGAGATGTAAC	TGGCGCATCGTCGTTC	CCCATACGTGAGGGAG	GTGCATATCCTTTACA	CATTATCCAGTTCATG	TTTGCGCTCTCTTATG	TACTCATGTCATGCAT	TCAGGATAGATCTGAA	GCATGATCAAGTTAAG	CACTCCATCTCTTATG	CTGAAACAGATGTTAG	ATAAGAGCATTGAGCT	TTAGGCATCAGTTAGC	TCTTCGGAGACGCACA	CTCTGGTTCTCTAGGA	AGCTCTCGTAGGGACT	CTCAGAAAGACAATAC	AGTGGGACAGACAGGT	GTCGTAATCACCCTCA	CGTTGGGCATCCGTGG	GTACTTTAGATGTAAC	GGGTTGCGTCATATGC	CGGTTAAGTAGTGAAT	TCAGATGGTAGCGTCC	CACCACTTCTTCATGT	TCGTAGAGTCAGGACA	AGCGTATTCTCACATT	TAGCCGGCAAGACACG	AGGCCGTGTCGCGAAA	ACTATCTCAGTCAGAG	GGATTACTCCATGCTC	TTAGTTCCACTACAGT	CTGATCCGTTTGTTGG	GGTGCGTCAGTAAGAT	GTACTTTAGCACCGCT	AACACGTCACTCTGTC	ACGCAGCCATGGGACA	GGCTGGTCAACGATGG	AAAGATGAGGGTTTCT	ACTGAGTGTACCGTTA	CTAGTGATCTCGAGTA	AGAATAGAGCTGCAAG	CGTTCTGGTCTGGTCG	CGGACGTCAAATTGCC
M32	GTCACGGGTCCATCCT	AAGTCTGGTTCCGTCT	GCGACCACAGGCAGTA	GGGAGATCAGTGACAG	CAGTCCTCAATGGATA	CAGAATCGTATCGCAT	TCAGGATAGAGTTGGC	CTAGAGTCACTTCGAA	TCGGGACTCTGTACGA	GATGCTATCATACGGT	ACCCACTCAGGAATGC	ATCTACTAGGCTCAGA	GGATGTTGTAGCGATG	GACAGAGAGACGCAAC	CCAGCGAAGTCACGCC	ACACCCTAGAGGTACC	TCGGGACGTGCACGAA	ATAAGAGGTCATACTG	ACAGCCGCAGGGTATG	TCGCGTTAGATATGCA	CCATGTCCACCACCAG	GACGCGTTCATGTAGC	CCTACACCACGCCAGT	AGCCTAAAGATAGTCA	ACTGAACAGAAGCCCA	ATCATCTTCACAATGC	TACGGATGTTCTGAAC	CGATGGCCATCACGAT	GTATTCTAGGACGAAA	TGGCCAGTCGGACAAG	TTTGCGCCAAGCGTAG	GGTATTGAGAGTACAT	CGTCAGGCACGGCCAT	TCTATTGGTACCAGTT	GGAACTTTCATGTGGT	ACACTGATCCCAAGAT	TCTTTCCTCGACGGAA	CAGCATATCAGTGTTG	GGTGAAGGTAAGTAGT	CCTCAGTTCTGAGGGA	GATGCTAGTCGCATCG	GCAGCCAAGATATACG	GTGCATATCGTTACAG	CATCAGAAGCGTAGTG	GTGCATATCCAACCAA	TCAGCTCGTTTGACTG	TTTCCTCGTCCTCCAT	AGGGTGAGTAAACGCG	CGTCAGGCAAGGCTCC
M33	GGAAAGCAGCTATGCT	CTGGTCTCAAAGCAAT	CGACCTTCATCTGGTA	CTGAAGTAGGCTACGA	CCTTTCTCACATAACC	GACTAACGTTGTGGCC	CCCAATCCATTTCACT	TAGTGGTGTGCATCTA	GAATGAACATGCTAGT	CGTAGGCAGCTCCCAG	CGCGGTAAGAAACCAT	GTCACGGTCAGTTGAC	AAGGCAGGTATGAAAC	GGAATAAGTATGAATG	AACCATGCATATGAGA	GGATGTTAGGGAGTAA	CTTAACTTCGTGGGAA	ACTGCTCGTGTGACCC	AACTTTCCACGTGAGA	CCTTCGACAACAACCT	TCGGTAAGTGTAAGTA	GGAACTTTCAGCTCGG	CCGGTAGAGCTTATCG	GTGCAGCAGACTGTAA	GAACCTATCGCCTGTT	CGGTTAAGTGGTCCGT	AATCGGTCAATCGGTT	TTGGCAATCTTACCTA	AACTCTTTCAATCACG	TGCGCAGAGGTGGGTT	ACACTGACATGATCCA	CCTAAAGCATGAACCT	ACTGAACGTCCAGTAT	AGCAGCCCAAGTCTGT	GGCCGATCATGAAGTA	TGCCCATGTGTTTGTG	CTACACCCAATGTTGC	GGGCACTAGTACGACG	TGGCTGGGTCGTTGTA	TTGCGTCGTTAGAACA	TAGACCAAGGGCACTA	GGGATGATCAGAGGTG	GTCCTCAAGTACGATA	CGGACGTGTCACCCAG	ATCCGAAAGCACAGGT	CTAGCCTCACCGATAT	CCTTTCTAGTAGATGT	CAACTAGTCACCTTAT	TTTATGCGTAGTAGTA
M34	ACGGAGATCAGCGATT	CTCTAATGTGTAATGA	GGACGTCGTGACCAAG	GATCTAGGTGCAACTT	TTTATGCCATGACATC	GTAGGCCCAATGCCAT	CATCGGGTCTGTCAAG	TGCCCTAAGTTAGCGG	CCATTCGTCTCAACTT	ATTCTACGTCTCACCT	CAGAATCCACTGTGTA	CGTTCTGTCGCCCTTA	CGCCAAGGTTACGCGC	GCAAACTGTGCATCTA	GCTCTGTGTCGCGGTT	CGGACGTAGTAACCCT	TGTTCCGTCACAATGC	CGTTAGATCATGCTCC	TATTACCCAAGCTGAG	GACGTTATCACTCTTA	CGATTGACATAGAAAC	GTAGTCAAGTCATCCA	TGCTGCTCACTGAAGG	GTGGGTCGTTTCGCTC	CAGAGAGTCGGCGCTA	CTCGTCAGTCATCCCT	CCGGGATGTCCGTTAA	ACTTACTGTCGTTGTA	ACGGAGATCGCGTAGC	CCTTCCCAGCTTATCG	CTCGGAGCAGTTCATG	GGGTCTGAGGGAGTAA	TTGAACGGTCGACTAT	ACGGGCTTCCTCATTA	CGAGCCACATGTTGAC	TGCACCTAGATACACA	CTCGGAGAGGACATTA	TTTGTCATCCGATATG	ATCACGAGTACCGAGA	TCAGGTAAGCGCTTAT	GATCGCGGTCGAAAGC	AAAGTAGCAAGGGTCA	TATTACCAGGATTCGG	AACACGTCATGTCGAT	GATGAGGGTTAAGAAC	TTTATGCGTTGGGACA	TCACGAACAAGTCATC	CTCTACGTCTGCGGCA	CGATCGGTCTCTGCTG
M35	AGCTTGACAACTGCTA	CTCGAAACACTGTGTA	AGCAGCCGTTTGGCGC	GTCCTCATCAGTTGAC	CCAATCCAGAAACCAT	ACGGGCTTCTTTACGT	ACGTCAAGTGGAAAGA	CATCAAGGTCGACTGC	CCTTACGTCAATCTCT	CATCGGGTCACATGCA	CCGGTAGTCGTCTGAA	CTCGAGGTCCTGTACC	GCTCTGTCATTTCAGG	GCGCCAACAACTTGAC	TTCTCAATCATCGGAT	GCTGCTTCAAGTCATC	GACCAATTCTCTGTCG	ATCACGAGTACCGGCT	GATCGCGGTGAAAGAG	GCATGATCAGGTCCAC	CTCAGAACAAATACAG	ACATACGGTAAGTGGC	CCTTCCCAGGCAATTA	CTCATTATCTTCGGTC	GGCTCGAGTCTTCTCG	TCATTTGCACTGTCGG	TTTATGCGTGTCGCTG	CATTATCCATCTACGA	TAGAGCTAGCCACGTC	CGAATGTTCAACGAAA	CTAAGACGTCGAGATG	GTAGGCCGTATAGGGC	GTACGTAGTTGGTGGA	GGCTCGACAGTCGATT	AAGACCTTCACTTACT	AAGTCTGCATGAAGTA	CGCGGTAAGAGTACCG	CGTGTCTCAGCGATCC	TCGGTAACATTGCGGC	TGCGGGTCACGGATAG
M36	GAATAAGAGTCCATAC	CGGGTCAAGTATCGAA	GGGTCTGGTGATAAAC	GTTCGGGAGTAAGTAC	AACTCTTGTCATATGC	TCAACGAGTGCAGACA	ATTATCCGTAGAAAGG	AACTGGTTCACTTATC	GAATAAGCACGTGAGA	GTAGTCAGTACGACCC	CTGAAACTCCCTTGCA	GCTGCAGAGCCAGGAT	GATTCAGCACAGGCCT	ACGGAGAGTGGCTCCA	GAATGAATCAGCATGT	CACCACTCATGTCCTC	TGGCGCAAGTACCGGA	CAAGAAACACATGTGT	TGCCCATAGGGATACC	CGTCACTAGGAGTAGA	GTATCTTGTGAACCTT	GTGTGCGGTCTCCACT	AGATTGCCACCCATTC	TCGCGTTCAGTTCCCT	CACACAAGTAAGGGAA	CATGCCTTCAGCTCGG	CTGTTTAAGTCACGCC	GCAATCAGTATTACCG	CATGACATCTGTCTCG	CAACCTCTCTGCGTAA	ATTACTCCATTACGAC	CCGGGATTCATAGCAC	GGACATTGTCTCAACA	GCAATCAAGGCCATAG	CCCAATCAGATCACGG	CCTAGCTCATGCGCAC	CCTTACGGTCAATACC	ACTGATGAGGAGTCTG	CAACCTCCAAGCCTAT	GACGGCTCATTGGTAC	ATGCGATAGATCACGG	CGTTCTGGTCGTTGTA	GTCCTCAGTCTCAACA	AGGGTGAAGAGGGCTT	ACGCCGAGTCATCCCT	TTCGGTCTCGCGATCG	GCATACACAAGAGGCT	GCGAGAACACCTCGGA	CAAGATCAGACCACGA
M37	TATGCCCTCTCATTCA	TGCGGGTGTACCAGTT	ACCCACTAGATCGATA	GCAATCACATGGATGG	TCACAAGTCACATAGC	CTCTAATGTGTGAAAT	GCTCCTACAGGTCTCG	TTAGGCAGTTATGTGC	ACGAGGAGTGCTAGCC	GATCGATCACAACGCC	CGGACGTAGTGGGCTA	CTCTACGTCGTCGTTC	GTTAAGCGTACCTACA	TACGGATAGTGCCATT	TACGGGCCACGTCAGC	ATCGAGTTCAGGCAAG	GAGGTGAGTTCAGGCC	CTTTGCGCAGCGATCC	TGCGCAGCATCCTTGC	GAAACTCTCTATCCCG	GGCTCGAAGAGGTAGA	CCTTCCCGTTTACTCT	AAAGTAGAGGACTGGT	ACGGGCTAGCGCTTAT	TACGGGCGTGATAAAC	GTCGTAAGTCTCCCTA	CAGCCGACATGTTGAC	GATCGCGTCCTGCTTG	CGGCTAGCAGCATGAG	GACCAATGTGGTCCGT	CATGCCTTCACCCGAG	TAGACCAGTGCAGGTA	TATCTCACATCGGAAG	GACGCGTCAGGGTACA	TGACAACTCTAACTGG	CGGCTAGGTTAAAGAC	TCGGGACAGTCTCGGC	CACACCTTCAGTCCCT	GAAACTCAGTTGCAGG	GCAGTTAGTTCCATGA	CAGTAACCAGTCAGAG	AAGGAGCGTGTTGAGG	AGATCTGCACCAGCAC	CACACCTTCGAGGTAG	TGCTGCTAGTCATGCT	AGGTCATAGCTAAGAT	CGTGTAACATGGTAGG	CACTCCAAGTGGTAGC	GTTCATTTCTTAACCT
M38	TCAGCTCTCCTGCAGG	GAATGAACAAATCCGT	AGAATAGGTAGCAAAT	GATGCTAAGAAGGACA	GGTGTTAAGTGAAGTT	ACTGAGTCAACACCTA	GGAGCAAGTCGCTTCT	GTATCTTTCAGGATCT	GTGTGCGCATGCCACG	CTGATAGTCACCCGAG	TCAGATGAGCCGATTT	ACGTCAATCCCGGATG	CTGCGGAGTACTCAAC	CAGAATCCACGGTGTC	CGGACACAGAATAGGG	CGTGAGCTCGCATGGC	GGCCGATGTGATGTGG	AGAGTGGTCGGAGCAA	CTCGTACCAGTAAGAT	GCGCGATAGGACACCA	AGAGCTTCACCAGATT	CAGCTGGTCAGAAATG	CCCATACCAAGCGATG	CAGATCAAGCGTAATA	AAGCCGCCAGTCGTGC	GCTTCCATCCATTCTA	TGAAAGAGTCCGAAGA	ATTGGTGTCCTGTAGA	CGTAGGCCATAGAAAC	AGAGCTTCACATTAGC	GACCAATGTGGTCTCG	CAAGGCCCATCCCACT	GACACGCGTAGAGCTG	CCGTTCACATGCCTAA	TTTGCGCGTTCCGTCT	ATTCTACCATCGATGT	ACTTACTTCCCACTTG	ATCACGAGTATGAATG
M39	ACTGATGGTACGAAAT	GATTCAGTCCCAAGTA	GGGAGATTCGCGGATC	CGAACATGTGCAGTAG	AGTGAGGCACAGGTTT	AAGTCTGAGGCACATG	ATGCGATGTCACAAGG	AATCCAGCAGAGCCAA	GGACATTCATGGATGG	CGGTTAATCCATGAGT	GCTCTGTTCCGAGCCA	AGGGATGCAAAGTCAA	TAGGCATGTCGGCACT	CGGCTAGGTCGAGTTT	TCTTCGGTCCATGCTC
M40	GCAGCCAAGTCCGTAT	CAACCAAGTCAAACTC	AAAGCAAAGTGTCTCA	TGCGGGTAGACAGAGA	TTAACTCGTCTACCTC	TCTGGAATCCAGTAGT	TGCCCTAGTTATGTGC	GCGCCAAAGCTACCGC	AGAGCTTTCTAACTGG	GTGGGTCAGAAGATTC	AATCGGTCATCGGACC	GCTGCAGTCGAGCCCA	ACGATGTAGGGTTTCT	CCACGGATCTCCAGGG	CAGATCATCTGCTGCT	ACGGCCACAAGTTAAG	AGAGCGAGTCCATGAT	TAGGCATTCCGAAGAG	AACGTTGTCGAATGGG	GGTGTTATCACATAGC	ATCCACCCAATCGGTT	TGACTTTTCCGCATCT	GAACCTAGTTGTTTGG	TTGCGTCCAATGAAAC	GGACAGAAGACAAGCC	GACTACATCGCGATCG	TAGACCAAGTACGCGA	ATCATCTCAAGCCATT	GACTGCGGTCCGACGT	CTTAGGATCGCGGATC	TGCTACCTCCTAGAAC	TTTATGCTCTCATTCA	ATTGGTGTCCTTAATC	TACGGATAGTCTCAAC	ATTGGTGCAAGTAATG	AGAGCTTGTGCACGAA	TAGAGCTAGAATTGTG	CAGGTGCGTATTACCG	AATCCAGGTCCCTACT	AACCATGCATCGATGT	TGAAAGAAGACTCGGA	TCAGATGGTTCCCGAG	TGTATTCAGAATGTGT	CTGAAACCATTTCACT	AAGGTTCCACATTTCT	AGAATAGAGAGTAATC	GTTTCTAGTCTTGTCC	CCTTCCCCAATAGCAA	GATCAGTCACCACCAG
M41	GGACAAGAGCATGGCA	CGCGGTATCTGCAAGT	CTGCGGAGTCGCTTTC	AAAGTAGGTAGCCTCG	AGCGTCGAGATGTAAC	AGCATACCATGCTGGC	CTAAGACTCACGCGGT	CCTACACTCGAATCCA	ACACCCTTCTCGATGA	CAGAGAGGTTTACTCT	CGAACATAGCCGATTT	AGAATAGTCGTGGGAA	CACATTTGTCACACGC	TGCTGCTGTAGCGTCC	GTCACAAGTGTCGCTG	CCAATCCCACTGTGTA	TGTTCCGCACCCATTC	TGACTTTCACGAAACG	GCGGGTTAGTACCGGA	TGTGTTTCATATACGC	CAGCAGCGTCAGAATA	TACCTATGTGCAGACA	CTAAGACGTCGACTGC	TAAGAGACAGGGCATA	CGGACGTTCTTCATGT	TATCTCATCCACTGGG	AACTCCCCAATGTAAG	TCTCATAGTGGCGAAT	CACACAACATGGTTGT	GATGAAAGTGTCTGAT	GATGAGGAGTACGTAA	TTGACTTGTTTGTTGG	ACATCAGCAATGTAAG	GTGCAGCAGCTGCAAG	GCTTCCATCCCAGGTG	AGTGAGGAGCATGGCA	TCTCTAACAGTAGAGC	CTCGAGGGTTGAGTTC	CCTTTCTAGTGTGAAT	GCTTCCACAGATCTGT	CGCTTCACATGAGCGA	GGTATTGAGACCGGAT	GGTGTTACAAGAAAGG	ACCGTAAGTATAGTAG	CACACTCCATATGGTC	AAGTCTGAGGTTCCTA	GAACCTACATTACCTT	CGTGTAAGTAAACGCG	GATCGATCACTTACGA
M42	CCTAAAGCAGGTTTCA	TGCCAAATCCAGTAGT	TTCTACACACGTAAGG	GTGTTAGAGACAGACC	TACTTGTGTTAAGGGC	TTTGGTTTCAGCGATT	AACCGCGTCTCGCATC	GTGTGCGAGTCGAGTG	CCACGGAGTTAGGGTG	TCATTTGAGATGAGAG	ACGCAGCCAACACCTA	GATCGTAAGGCCCTTG	AAATGCCGTAAATGTG	ACTTGTTAGGATTCGG	CTCCTAGGTGAGTGAC	GCATGATCACTACAGT	CGAACATGTCTTGATG	TCCCGATTCCAAACTG	CTGCGGACATCCCACT	ATCATGGTCCACGAAT	AGGCCACGTACATCCA	TGACGGCCATAAGACA	CAGCGACAGTTGAGAT	CCTATTATCACGCGGT	CCTCTGATCTACCAGA	CTACACCAGGCAATTA	GGGTCTGTCAAACCAC	CTGATAGTCACAGGCC	CATATGGGTTGATTGC	AAAGATGAGTGCAAGC	GGTGAAGGTGGTACAG	AAACGGGTCCCTCAGT	TAGTTGGTCTGACCTC	TCGTAGAGTCAACTGT	TACTTACCATGGGAAC	TACAGTGTCACATGCA	CTGATAGGTTGAGGTG	CGACCTTCATCCCATC	CTCTAATCACCCATGG	CTCATTACACGTGAGA	CTTAGGAAGCTACCTA	GCTGGGTCACTTAAGC	GAACGGACAGTAAGAT	TGGCCAGCAATGAATG	CTGCGGAAGGGTTTCT	TAGGCATCACATGACT	ACTGATGTCGCCATAA	CTACCCAAGTGAACAT	AGATTGCCATCGACGC
M43	AGCGTATAGAAACGAG	CATCAAGCATGCCACG	AGCCTAAGTATATGAG	TACCTATGTATCAGTC	CTGTGCTGTATGGTTC	ATGCGATCACGTTGGC	ACTATCTTCAGATAAG	TTCTCCTAGTCAATAG	TCATTACAGTTACGGG	CTAACTTAGCTTATCG	CGCGTTTTCGCTGATA	CAAGATCGTCAACTGT	TCAACGACAGTGACAG	TAAGAGATCAAAGTAG	TCAGATGGTATATGAG	ATTTCTGCATTTGCTT	ATCATGGGTACAGCAG	CACTCCAGTCGCGGTT	AGGGATGCAAGGTTCT	CAGAATCTCTTCGGTC	GGCGACTGTGAGTATA	GTTCGGGAGCCATCGC	CATATGGCAGGGTATG	TTTGGTTTCCAAGCCG	CTAACTTGTCTCGTTC	AAGGCAGGTATATGGA	TGCGGGTTCCTCATTA	TGAAAGAGTCCCTACT	CCGTACTGTCTAAACC	ACTGTCCAGCAGACTG	AGGCCACGTTCGCGAC	AAGGCAGGTACTCGCG	TGCGCAGAGCGCCTTG	CCTCAGTAGGATGTAT	TGCGTGGGTGACCAAG	ACTGCTCTCCCGACTT	TCGTAGAAGTGGACGT	TACGGATAGCCCAACC	GGATTACTCTTTACGT	AGGTCATAGGATGTAT	TCTCATAAGTCGCCGT	ACTTGTTTCTTCGGTC	AGCATACGTCGCTTTC	GGCTGGTCAGTTCCCT	GCATGCGAGGGTCTCC	GCCTCTAAGAAGAAGC	GGACATTTCGAATGCT	ATGTGTGGTCAAACTC	GGCGACTTCTTTACGT
M44	ATGAGGGAGACCCACC	ACATACGTCTCGCTTG	TAGGCATTCCTTGACC	CCTACACGTTCGAATC	TGACGGCGTACCGAGA	TGAGAGGAGAAGCCCA	GTATTCTCAACTGCTA	TGGCCAGCATTACGAC	GTTTCTATCGATGAGG	TTCGGTCCACTAGTAC	CGTAGGCGTCAGGACA	TTATGCTTCGCCAAAT	CGGAGCTGTGGACGAT	CGAGCCACACGTGAGA	TCGCGAGAGAAGCCCA	CCCTCCTCAGGGTATG	GTCCTCATCAACACCA	TGATTTCGTGAAGGCT
M45	TAGGCATAGGTGCACA	CTGCCTAAGAAACGCC	CTCGTACAGAAACCTA	CTACATTCAAGACGTG	TTTCCTCAGTGCGATG	GTGCGGTCAGTCGATT	TTCTCAAGTACTTCTT	TTCTTAGTCGCTTGTC	CCTACACGTCTAAAGA	TACTTGTCATCAGTCA	CCTAGCTAGTGTACGG	ACGGAGACACCACCAG	GTTCATTAGGCTATCT	CCTAGCTCACCTCGTT	TGTTCCGTCGAATGGG	ACTGAACTCCACTGGG	ATCATGGCAATGGATA	CTAAGACTCCGTAGGC	ACGCCGACATTGGGCC	AGCCTAAAGTCGATAA	ACACTGATCATACGGT	CTTACCGCAGCCTATA	CTAACTTAGAGAGCTC	GATCGATGTCTGCCAG	ACTGATGTCACATGCA	TTTGGTTAGGTTACCT	CAGAGAGGTCAACTGT	GCTGCAGAGCTAAACA	ACGGAGATCACGGTTA	CCTCTGACATCGATGT	CTTTGCGGTCCAACTA	GTGAAGGTCCCTTGCA	AACCGCGCATGCAATC	TGCCAAAAGGCATTGG	GATGAGGGTCCGTTAA	ATCCACCCAATCTGCA	GTCTCGTGTGGCTCCA	GTATTCTAGCGTCAAG	ACTGCTCGTTCTGTTT	GTGGGTCCAGTATAAG	ACGTCAAGTCGACTGC	ATCGAGTTCTTACCTA
M46	TTGGAACAGACTTTCG	GCTTGAAGTACCGTTA	TGGGCGTGTTATTCTC	ACAGCTAGTGCGAAAC	CACAAACTCCGGCACA	GAATGAACATATGGTC	AACTGGTAGTACGCCC	GTATCTTGTCTCTTTA	GTGCGGTGTGATGTCT	GTTTCTAAGGTGATTA	CTCGGAGAGACAAAGG	TACACGACAAGTAATG	ACTGAGTAGTATCGAA	ACTTGTTAGACTTGAA	ACCAGTAGTGCTGTAT	GCTGCAGTCGGAGGTA	CCGTACTTCATAACCG	GATCTAGAGCCCAACC	GTTACAGCAGGATTGG	GCTCCTACAGCGTAAG	CCCATACGTCCGTCAG	ACACTGAGTCACTTCC	CTAACTTTCGAGGTAG	AAAGTAGCACCAACCG	TACTCATTCGCCATAA	TACCTATTCTTGAGGT	CACCTTGAGGCCCTCA	TCAGCTCCATCGGGTC	GGACATTTCACCATAG	CTCTACGCAGTGACAG	TTCGAAGGTAGCGATG	TCAACGAAGCTCTCGG	CCACGGAGTCGCTTTC	TAGACCAGTCTGATTG	ACGGAGAGTAGGACAC	GCTTGAACACCGCTAG	AGTGTCAGTTGAGTTC	ATTACTCAGCTGATAA	CCACCTACAGTCGTGC	ATGTGTGCAGGACGTA	CTTCTCTAGGCTCAGA	GTCCTCATCGTAGGAG	CACACCTCATGAGCGA	TCAGCAAGTGGGTCAA	CGGAGTCGTGTGTGCC	TCACAAGTCCTCATTA	TCAATCTTCACCACCT	CCCTCCTTCGCCTGAG	CACATAGAGACCCACC
M47	CACAAACGTTAAAGTG	CTACGTCGTTGTCGCG	GAACGGAGTAGAAAGG	TAAACCGGTTCCACGG	TACTTGTTCCTCCTAG	GAACCTAGTATAGGTA	TTAACTCTCCTAGGGC	ACTGAGTGTTACTGAC	AGTTGGTGTCCGAAGA	ACGATGTGTCAGTGGA	TCGTACCCATGCAATC	CTGCCTACAACACCTA	GTACTTTCACCGAAAG	AGTTGGTTCCGTAGTA	TCTTCGGAGTTTCCTT	CCTAGCTCAATCGGTT	TACGGTAAGGCATGGT	CATCGGGGTTCCGTCT	CCATGTCCAGGCTCAC	CGTCACTTCACCTTAT	GTAGTCACAGCCTTTC	TACGGATGTTTGGCGC	CGTGTAAGTATAATGG	TTGTAGGTCCGAACGC	CGTGTAATCCAAAGTC	TTGGCAATCTTCGAGA	CTCGGAGGTGGCCCTA	CGAGCCATCGGAGGTA	TAAGCGTCAGATTGCT	GGACATTGTTTCGCTC	TAGACCAGTCGCATAT	AGGCCACCACCGAAAG	CGCTATCGTGAGGGTT	GGGCACTTCTCGTATT	CGTCACTCACTGTGTA	GGACGTCGTGATAAGT	CTTTGCGTCTGACCTC	TTCTCAATCATTTGGG	TAGTTGGGTATCAGTC	AGTTGGTGTTGGTGGA	TTGGAACCATTGTGCA
M48	ACCCACTTCAGTCAGT	AGGGTGACACCAACCG	AAGACCTAGCACAGGT	TATTACCCAGCGAACA	TTAGGCATCCAAACAC	AGGTCATTCATTGCGA	ATGCGATCAATGGAAT	GGCCGATGTTGAACTC	CAGATCACAATGTTGC	CCATTCGAGATGCCAG	TATTACCAGGTGTTAA	CAGCTAATCAGCACAT	TGCGGGTAGACTTGAA	TTCTCCTGTTACAGAA	ATCTACTAGTTTCCTT	AGATTGCTCTTCGAGA	TGGGCGTGTCTTCGTC	ACATGGTAGACTAGGC	CATTATCAGTCTTGCA	TCTCTAAGTAGCAAAT	GACGCGTAGTTAACGA	CAGCTGGGTCGGCACT	CATCCACTCATTGCCC	GCTCTGTCACAACTGT	TGACTTTGTTTAGCTG	TCAGCTCGTCAGATAA	TACGGGCGTCTCACCT	ACTTGTTAGAGACTAT	CACCTTGGTGTGGCTC	ATTTCTGCATGCGCAC	TAGACCACACGGTGTC	GCATGTACAGGCTGAA	GTAACGTCAGACAAGC	CCAGCGACAAGCGCTC	CGTCAGGAGTCTTGCA	AACCATGAGACTGTAA	ACTTACTAGGATCGCA	GATCGCGCAAGCTGGA	CGCCAAGTCCATGCTC	GCTGCGAGTACTCTCC	TTATGCTTCAGCTTAG	TTCTACATCAGGCCCA	CGATCGGAGTCAAGCG	CTGCTGTTCTTTACGT	ATCGAGTGTCAAAGCG	CAACCTCAGGCACATG	TCTCTAATCTTCCTTC	TCTTCGGAGCTCCTTC	GGTGCGTTCACCATAG
M49	CTTAGGATCTCCCTGA	TGAAAGACAGACAGGT	TAAACCGTCCTCTAGC	GCGCAGTTCGAGGTAG	ATAGACCCAGCTGTTA	GGTATTGAGTGGGTTG	AACTCAGCAAGAAAGG	GGAATAAGTAGTACCT	CGATGTAAGCTAGTGG	GCAGCCACAAAGAATC	AGTGTCATCTGCGTAA	GGCAATTCACGGCGTT	ACCCACTTCCCTGACT	CGAACATGTAAGTTCC	TCTCTAACAGGCTCAC	GGAACTTTCAATCTCT	GGTATTGGTGGTCTCG	CATCCACGTCGCTTCT	TTGGCAAGTGTTAAGA	GGTGCGTCACTCGACG	ACGCAGCGTTAAAGAC	CTCTGGTCATGGTCAT	TAGTTGGAGACTGGGT	GTCGGGTCATATACCG	TACTTACGTTCGGGCT	CAACCAACATTTGCTT	TTTACTGTCTGCAAGT	CACAGTAGTCGGCATC	GGCTCGAGTACAAGTA	CTGTTTAGTTATCACG	ACTGCTCTCGTCGTTC	ACTTACTTCGTTGACA	TGCCAAAGTCAGCTAT	ACGGCCAAGGCCATAG	ACGGAGACAGGGTATG	TGGGAAGCATGTTGAC	ACACTGATCGGAAACG	GTATCTTCAGTGACAG	TGCGCAGAGGGTGTTG	CAAGGCCCAGCAGTTT	ACTTTCACAGACTCGC	ACTATCTAGGAATTAC	AACTCCCAGAAGGGTA	CAAGAAAAGAGCAATT	GGCGACTGTCCGAAGA	TAAGTGCCAACTGGCC	TCATTTGCACGCTTTC	CGAGAAGGTGTTTGGT	ACTTGTTCAGGACGTA
M50	GAGTCCGCATTAGCCA	ATTATCCCAAGTAATG	TAGTTGGAGAAACCTA	GATCGTACACCGAAAG	TCGGTAAAGGAGTTGC	TGTCCCAGTGCACCAC	CGCTATCGTCAGAGGT	GTCTTCGAGCAGCCTC	CGATGTAAGAAACCAT	ACCTTTATCCAAGCCG	TGAGCATTCTGAAAGA	CTTCTCTGTCAGATAA	CTCAGAAAGGTGCACA	GCTTGAAAGGTGATTA	TGATTTCAGCACAGGT	TTCGGTCAGGTGACCA	AGCCTAAAGCAATCTC	GCTTGAACACTTGGAT	GTCAAGTAGGCAATTA	TGACGGCGTAAGTGTA	ACATACGCAGTATAAG	GGGTCTGTCCCAAGAT	CTTACCGTCCTTTCTC	CGTTAGACATTCTCAT	ACTGTCCAGTGTTGAA	AACCATGTCTCGTATT	CGAGCCACACCCTATC	GAATAAGAGGCATTGG	GCGCAACCATCCGGGT	TCTTCGGAGCGTTTAC	GCTGCTTGTACAGACG	CAGCATACAGGTCCAC	ACTTTCAAGCCCAACC	CGCGTTTCATGTAAGA	CTCGTCAGTCAAACTC	CCTCAGTGTACATCCA	ACTGAGTGTGTATGGG	CCCATACCACGAGAGT	AGTGGGAAGAACAACT	GCGGGTTGTGTCAATC	GGGAGATAGTGGTCCC	AGCTCCTCAATGGAGC	CTACATTTCGTGGGAA	CTGATAGGTCATGCAT	CAGAATCTCTGAGGGA	AACTTTCCAAGCGCTC	GTAGTCATCTTGCAAG	GCCTCTACATCTCCCA	CATATGGAGTGCCAGA
M51	GCTGCAGCAAAGTCAA	GGACAAGGTTCGCTAA	TTGTAGGAGGTGATAT	AAACCTGAGCATCATC	CACAAACCACTGTGTA	TCGGGACTCTGCCCTA	TGCCAAAGTCTTGTCC	TGACTTTGTGATAAAC	ACGAGGATCGAATCCA	TTCTCCTTCCGCGCAA	GGCGTGTGTAAACGCG	ATAAGAGAGCGTCAAG	TCAATCTCAAGCGATG	ACAGCCGGTAGCGATG	TCAACGAAGCGGCTTC	CTCGGGATCTGTGCAA	GGATTACAGCCAACAG	CCACCTAAGTATCGAA	AACTGGTTCACAAACC	CGAACATTCAACACAC	GACGTTAAGTCATGCT	TGGTTCCTCCCTCAGT	ATTACTCGTCCAGTAT	ATTGGTGCAAAGTGCG	ACAGCTAAGGGTTCCC	CTGTTTAGTCAAAGCG	GATCGCGAGGTAAACT	GGGCACTGTGACCAAG	ACGCCAGGTTATCGGT	ACGATACGTCTACCTC	CCCAGTTCAAGAGGCT	ATAGACCCATATGAGA	GCGAGAATCGTTTATC	GGTGTTAAGCCACGTC	CAGGTGCAGAGGGCTT	GAATGAACAGGGTACA	CTACATTGTAATAGCA	ATCCGAATCCAGATCA	CATATTCAGGTGATTA	AGTGTCAGTCGCGTGT	CTACACCTCTTATCTG	TACGGTACATACTCTT	CCGTTCATCCATGAAC	CCCAATCCAAGAAGAG	ACCAGTATCCACTGGG	GGGACCTGTCTAGCGC	GTTCATTGTCTTCAAG	TCAGGATAGTGGGATC	GTCTCGTAGTGGGTTG
M52	AGTGAGGCAACTGCTA	TTTGCGCGTAAATGAC	TCAGATGCACTCAGGC	CACCAGGCAGTCTTCC	CCGGTAGGTTGAGTTC	AGCGTCGGTCCAAGTT	GCATGCGGTTATGCGT	CTAATGGCAATGAAAC	TTATGCTAGTCTCAAC	TGGTTCCTCAGAAATG	ATTTCTGCATAAAGGT	AGTTGGTGTTGAGGTG	TCAATCTGTCATCGGC	GTCGGGTTCGCTAGCG	TGCCCATGTCTCATCC	TGCACCTAGGTGTGGT	CGGAGCTAGAATTCCC	CTCGAGGAGTGTCTCA	AGGTCATCATTCACTT	TCTCTAATCCTTCAAT	GGTGAAGTCCACTCCA	GATCGATCAACTGGCC	TATCTCATCCCTCAGT	GCTGGGTGTCGGCATC	CACCTTGGTATGGTTC	TCAGGATAGCTAGCCC	TACACGACATCACGTA	GGAATAACACTCAGGC	CGGACGTTCACAATGC	TACTTACCACCACCAG	CTCTAATGTTTGTTGG	GGGAATGAGCCTATGT	ACACCCTTCGGCCGAT	TACTCATCATATACGC	AACCATGAGGTAGCTG	GCTCCTAAGGACAGAA	GCCTCTATCCCTGACT	GTTACAGAGCAATATG	GTATCTTAGTATCTCG	AGTAGTCGTATAGTAG	GCCTCTAAGCTAGTTC	CTCGGGAAGTGCGATG	CGTGTCTTCATCGATG	CTAGCCTAGCTTCGCG	AACACGTGTTGTCTTT	CGAGAAGAGGTACTCT	CATGGCGCACACGCTG	CACTCCATCTGTCAAG	ACGCAGCTCTACTCAT
M53	AACCGCGGTCCTAGCG	ATTACTCCAACGATCT	CATATGGAGAACAACT	GTTCTCGCACAGATTC	ACGGCCAAGGTACTCT	TAAGTGCTCACCCGAG	CATGCCTGTGCCTGTG	AGCTTGACATTCCTCG	CACCTTGAGCAGACTG	AAAGCAAAGCCCTAAT	AGGGTGAAGTGGGATC	GTGCATACAAAGAATC	AGGTCATTCGGATGGA	CTGGTCTGTTGTCTTT	CGAGCCATCTTACCTA	GTCATTTGTCCAGTTA	TACTTGTCATACAGCT	ACTATCTAGACTAAGT	ACTGAACAGACCTAGG	GAGGTGAAGATCACGG	TTTATGCAGCGATGAC	TTGCCGTTCCCAGGTG	CGGCTAGTCACCTCGT	GGGTTGCTCTATCCTA	CTTGGCTGTTAAGTAG	CATATGGTCTTGTCAT	AGCTTGAGTGACGGTA	CTACACCTCTTGACGA	CCAGCGACAAAGTGCG	CTGAAACGTGGTGTAG	ACGTCAAAGTTATCGC	TGCTACCCAAGGCTCC	CGGGTCATCATCACCC	GGGAGATAGAGGACGG	GCCAAATCACGAAGCA	TGACTAGAGCAGATCG	TGACAACAGGAGTAGA	GAGGTGATCAGCACAT	CACTCCACACCTATCC	ACAGCCGAGTGGTAGC	ATCATCTTCACGAAGG	AGTGGGACAGTAACGG	GGGTTGCAGTTCGATC	TGTATTCTCGAACTGT	CGATGGCTCTTGACGA	ACATGGTAGTGGTAAT	GTGCGGTTCGAGGTAG	AGTAGTCCACCTGGTG	TACGGATGTAAGTAGT
M54	CCGTACTGTACCGGCT	TGCGCAGCATCGACGC	TCCACACCAATAAGCA	ACTTGTTCACCAGATT	CCTTCCCTCACGAAGG	TTGAACGGTCTAGGTT	CTAACTTAGTGTACGG	TACTTGTTCTCGTATT	TTGCCGTGTGGCAAAC	TTGAACGGTGAACCTT	TGAAAGAGTGTATGGG	CCTACCAGTTTAAGCC	TTAGTTCAGGCAGGTT	CGACTTCTCGTGGTCG	CCTTTCTAGGCAAAGA	TCGGGACCATCTACGA	CTCGGGATCTGCTGCT	TGAGGGAGTTCACGGC	GATGAGGAGCAATCTC	CTGAAACGTCTCACCT	AAGCCGCAGCGATAGC	TTGCCGTCATTCTTAC	GGAGCAAAGACCGGAT	CCTCAGTGTGCAGGTA	CGATGGCCAGGGAGAG	AGAGCTTAGCAGGTCA	TAAACCGGTGTTAAGA	CATGGCGCAGATGGGT	CCTAGCTAGAGACGAA	TCGTACCTCGACAGCC	TAGACCAGTCAACATC	AATCGGTCAGATCTGT	GGGTTGCTCATGTGGT	TACTTGTGTGATGATA	AGCTTGAAGAAGGTGA	GAAGCAGTCTTGTATC	TCTATTGCACAGGTTT	GCGCAACTCTGGGCCA	TTGGCAAAGTACATGA	GCACATAGTTTGTTTC	AGTGAGGAGTCTCCTC	TGGGCGTAGATCTGAA	TATCAGGAGAAAGTGG	CAGATCAAGTGTCCAT	CAACTAGCACAGACTT	TCCACACCATTGAGCT	CGGGTCAGTCTGATCA	CGTTCTGTCAGGCGAA	TTCTCAATCTATCCCG
M55	CCTAGCTAGTTTGCGT	CTACATTTCACTCTTA	CTCGGGAGTTAAAGAC	TGGGCGTTCCTAGTGA	TATTACCAGTCAAGGC	GTGCAGCGTGTGAATA	TGCACCTAGCTCCCAG	TGCACCTAGATCCCAT	GGACGTCTCGACCAGC	TGGCTGGTCGTCCAGG	GCCTCTAGTGCATCTA	TACTCATGTCAGCTAT	TACCTTATCTAACGGT	CCCTCCTAGGCGCTCT	AGCTCTCGTGCCTGCA	GAGCAGAAGTTTAGGA	GTGCAGCCATCTGGTA	CCTTCGAAGTCCAGGA	TAGTTGGAGTGAATTG	ACTATCTGTGTCAATC	GCGGGTTTCATGCAAC	CTGTTTAGTCCCGACA	AGCTCTCAGTACGTTC	CCAGCGATCCTAGTGA	CGAGCCATCCCTGACT	GTACTTTAGCTAAGAT	ATAACGCCACGGTAGA	CGCGTTTAGGTGTTAA	ACAGCCGGTGCACTTA	TAGGCATAGTGTCTCA	CACCACTAGACTTGAA	AAGGCAGTCAGGTAAA	AGAGCTTTCCAAACTG	AAGCCGCGTTGATTGC	AACCGCGAGGAGTCTG	GTGCTTCAGTCCGTAT	CTGGTCTAGGAGCGAG	CGCCAAGAGGCATGTG	GGCGTGTCACGGCCAT	AGTGTCATCTCTGAGA	TCTCTAACATCGATGT	TCACGAAAGCTATGCT	ATTACTCAGGAGTTTA	CATATGGCAAGCCGTC	CATCAAGTCTCTGAGA	ACCAGTATCCTGCTTG	GTTAAGCGTCCATGAT	CGCGGTAGTATCTGCA	GCAGCCACATTAGGCT
M56	TGCACCTTCCACGTGG	GCGCCAAGTTCGCTAA	GGACGTCGTAGAAAGG	TGCTGCTTCGGCCGAT	TAAGAGAAGCTGAACG	ACGCAGCGTTCAACCA	TCCCGATAGCTGATAA	GAATGAATCTTGAGAC	CTTTGCGAGCATCATC	TTAGTTCGTTGACGTT	TCGGTAAAGGTCATCT	CACCACTAGAGGACGG	CGGACACAGTACGTTC	TAGTTGGGTTACGTCA	CCATTCGAGTAATCCC	ATCACGATCCACGTGG	TCAACGATCTGGTATG	GCGCCAAAGCTGCGAA	ACACCCTAGCCGGTAA	GGGAGATAGTGGGATC	CATTCGCAGCTAACAA	ACGCCGAGTGTCTGAT	CAGATCAGTACCGTAT	CGCCAAGCATGAAGTA	TGTTCCGCAGCGTTCG	CTCATTAGTCGGCTCA	TTGGAACCAAGCCCAC	CGTAGGCAGTCTCAAC	GCCTCTAAGACACGAC	TCACGAACATGGTCTA	TGAGAGGGTAGCACGA	TCACAAGCAGTATGCT	TACCTTACACAGATTC	GTGTGCGCAGGATTGG	GTCTCGTAGTACGCCC	CTTTGCGGTACATCCA	CCTAAAGTCTCAAACG	GTAGTCAGTTTGTTTC	CTAGAGTCAATGGTCT	CCTTCGAGTCGAGATG	ATTGGACTCACAAACC	GATCAGTGTACCTACA	GTGCATAAGTAGTGCG	GTAGGCCGTAGCTTGT	AGAATAGCACACCGAC	CTTAACTTCGACGGAA	ATGAGGGAGTCCTCCT	GTGTTAGGTAGAAAGG	CTTACCGTCAGCTCGG
M57	TCTATTGCATCCGTGG	CTACGTCTCCCAACGG	TCTCTAACACGCCAGT	CTACACCAGCACCGCT	CACTCCAAGAGCTTCT	GGATGTTTCAACGGGA	GTCACAACAACGATGG	AAGTCTGTCAAGATCC	GCAGCCACATCCGCGA	CTTGGCTCACTAAGTC	GCAGCCACAAGGACAC	AGATCTGGTTAAAGAC	AATCGGTAGGTGCTAG	TGCTACCGTGTTCGAT	CCGTTCACAAGGCTCC	GCTGCTTTCCTTGGTC	CCTACACCAAGCCGTC	TTCGAAGGTGCTAGCC	TGAGAGGGTCCAGTGC	TCGCGAGGTGATGCCC	AACTCTTGTGTGCCTG	CAGTAACCAGGACGTA	AAGGCAGAGCTACCGC	CCATTCGCATACTACG	CTGGTCTAGGGATCTG	CGTAGGCCACCAACCG	TCTATTGTCGGTCTAA	GCGCAGTAGACCGGAT	AGTGTCATCGACGGAA	AAACCTGTCCTGTAGA	CGACTTCCACGACGAA	ATCCACCCATAACCTG	TGGTTCCGTCGAACAG	TCTATTGAGTTGAGTA	AGCGGTCAGCTGGAAC	GTATCTTAGTGCGTGA	CCTCAGTCACCATCCT	TCACGAAGTCGAATCT	AGCTCCTCACCTATCC	CGGTTAACAAGTCTAC	TCAGGATCATCATCCC	AGCTTGAGTGTCTGAT	TGGGCGTCACTTCTGC	GTCAAGTTCATCGGAT	TTTGCGCAGCTGAACG	ACACCCTAGATGTGGC	CGTTCTGTCCTGTACC	GTGTGCGTCTGGTTCC	AAAGCAAGTCAATACC
M58	TAGGCATAGTCAAGGC	TATTACCCACAAGTAA	GCGCAACCATGACGGA	AAGGTTCAGTGGGCTA	CTGGTCTAGAGAGCTC	ACCTTTAAGACTTGAA	TACCTTAAGATGCCTT	GTACGTACAATCCGAT	GGAACTTTCGCCATAA	CGACCTTCACGTTGGC	GACACGCAGGCATTGG	CACACCTAGGCCGAAT	CATCGGGCAAGAAGAG	AACTCAGGTTACGTCA	TTCTCCTGTGGAAAGA	CCTACACCAGTTCCCT	GGATGTTAGAGGTACC	CGCGGTACAGTACACT	GTACGTACAAGCCATT	TCTCTAACAGCTTCGG	GCATACACAGATGAGC	GCGAGAAAGACTAAGT	GTGGGTCTCTACTTAC	GCGCCAATCATTGCGA	CATCAAGAGCCACCTG	GGGTTGCTCAGCATGT	GCGCGATCAGCTGCAC	GGTGAAGAGACTCGGA	GGACAGAAGTCGTACT	CAGCTGGGTCGTTGTA	GACACGCTCGTTTATC	GAATGAATCCAAGTAC	CGTCCATAGTTTGCGT	GCCAAATCAATCGAAA	GTTACAGTCTATCCTA	TAGACCAGTGGCAAAC	TGGCTGGAGCTAAACA	CACACCTAGGCACATG	TAAACCGAGCGTGAGT	GTACTCCTCTTAACCT	GCGCAGTGTCTGCGGT	AAGACCTTCCGCGGTA	CTCGGAGTCTATCCCG	CTACACCTCAGCTTAG	CCAATCCGTCGACTGC	CCAATCCGTGCTTCTC	CGTAGGCCATATACGC	ACCCACTTCAATCACG	GTGAAGGCACACAGAG
M59	CTTAACTTCTGCGGCA	ATCACGAGTCCATCCT	TGCCCTAAGTACATGA	TGAGAGGAGGTGTGGT	CCGTTCATCACCACCT	CCCTCCTAGACTGGGT	GACGCGTGTGCACTTA	ATGTGTGAGCCCAGCT	TTTGCGCTCGCTTAGA	GCTCCTAGTCACTGGC	AAGGAGCGTGTTCGAT	TTGCGTCCAAGACACG	CTCGGAGGTAACGCGA	AGTGTCAGTTAAAGTG	CAGCATAGTACGAAAT	AAGGCAGCATAAAGGT	CAACTAGCAAGCGATG	AACTCAGAGCTAGTGG	CGAGAAGGTTATCACG	ATGGGAGTCTCCAGGG	GAACCTACAATCAGAA	CCATTCGCACAGGAGT	CATCGGGGTTGGGACA	TCACGAAAGCACCGCT	GGTGAAGTCGGCGGTT	TGAGAGGGTACTCGCG	TACTTGTAGTCTTGCA	GAGTCCGCAGCAGTTT	CTGCCTAAGCTGAAAT	ACCGTAAAGCGTAATA	CCGTTCAAGACTTGAA	GGAACTTAGTTGCAGG	GTCATTTTCAGCGACC	TGCTACCAGCTACCTA	CACTCCAAGAGGTACC	CGGACGTGTACCATCA	CGCGTTTTCCGCGGTA	GATGAGGAGACAAGCC	GAATAAGGTGACGCCT	CAAGAAACACACCGCA	CTACACCGTCTAAACC	CGCTTCACAGGTCCAC	AGGTCCGCATCGGGTC	TGACAACAGGAATCGC	GTGGGTCTCTTTACAC	GAAATGACAAACGCGA	GCGCAGTAGTAGGCCA	CATCCACAGAAACCGC	TTAGTTCAGAGTTGGC
M60	GAGTCCGCATTAGCCA	GATCGTACACCGAAAG	CGCTATCGTCAGAGGT	CTCAGAAAGGTGCACA	TTCGGTCAGGTGACCA	GCTTGAACACTTGGAT	GTCAAGTAGGCAATTA	TGACGGCGTAAGTGTA	GGGTCTGTCCCAAGAT	CGTTAGACATTCTCAT	AACCATGTCTCGTATT	CGAGCCACACCCTATC	GAATAAGAGGCATTGG	GCGCAACCATCCGGGT	TCTTCGGAGCGTTTAC	CAGCATACAGGTCCAC	ACTTTCAAGCCCAACC	CTCGTCAGTCAAACTC	CCTCAGTGTACATCCA	GGGAGATAGTGGTCCC	AGCTCCTCAATGGAGC	CTACATTTCGTGGGAA	CAGAATCTCTGAGGGA	AACTTTCCAAGCGCTC	GTAGTCATCTTGCAAG	GCCTCTACATCTCCCA	CATATGGAGTGCCAGA	GTAGTCAAGGGCATGT	CATATGGAGTCACGCC	CAACCTCCAGTAACGG	AACACGTAGAGGTTGC	TTAGGCATCAGCTCGG	ATTGGACAGCTAGTTC	AGCATACTCCATTCTA	ACAGCTACATGGATGG	CCTACACCATCTCCCA	GGACATTCACCATCCT	ACATCAGCAGTATAAG	AGGTCATTCAGAGGTG	TTATGCTAGAAACCGC	ACCCACTCATGGAATA	GGAGCAAAGCTATGCT	AAGCCGCCACTGCCAG	TGGTTAGAGGGTGTTG	CACCTTGAGTGGAGAA	CTTGGCTTCAGAGCTT	GGCTCGATCTCTGCTG	AAAGCAATCACGATGT	TCCCGATCAAGGGTCA
M61	TAGTTGGAGAAACCTA	TCGGTAAAGGAGTTGC	GTCTTCGAGCAGCCTC	ACCTTTATCCAAGCCG	CTTCTCTGTCAGATAA	GCTTGAAAGGTGATTA	AGCCTAAAGCAATCTC	CTTACCGTCCTTTCTC	GCTGCTTGTACAGACG	CGCGTTTCATGTAAGA	ACTGAGTGTGTATGGG	CCCATACCACGAGAGT	CGGAGCTGTCTCAACA	GCAATCATCGTAGATC	AGCATACTCTACTCAT	AACACGTTCTCTGAGA	TCGCGAGCACCGAATT	GGAATAACAGCATACT	CACACAAGTAGCGATG	ACTTGTTAGCGTGAGT	ATTGGTGAGTACGACG	CAGCATAGTACCGCTG	GAACATCCAACTGCGC	GTGCTTCTCAAGCCTA	TTCTCCTCAAACGTGG	AACTTTCCAGTCAGAG	GGCTGGTGTACAAGTA	AGGGATGGTCATATGC	CGACCTTCAGCGATCC	GACTGCGAGACTAAGT	TGTCCCATCTTAGCCC	GGGTCTGTCGAGAACG	AGTCTTTGTCCAGTAT	GTGCATATCGTATCAG	CTTTGCGAGTGTGAAT	CGTTCTGGTACAGTGG	CTGTTTAAGGGTCGAT	TCACGAAGTTCCCTTG	GACTAACCAATCTGCA	GATCGTAGTCTAACGT	TATCTCACATGCTAGT	GTCCTCACAGGTCCAC	TGAGAGGGTGATGCCC	GTCGTAACATACTACG	TGCTGCTAGGATATAC	TTATGCTCAAGGACTG	GATCTAGGTAAGTTCC	TGATTTCGTCCGACGT	GTACTCCTCTGAGGGA
M62	ATTATCCCAAGTAATG	TGTCCCAGTGCACCAC	CGATGTAAGAAACCAT	TGAGCATTCTGAAAGA	TGATTTCAGCACAGGT	ACATACGCAGTATAAG	ACTGTCCAGTGTTGAA	AGTGGGAAGAACAACT	GCGGGTTGTGTCAATC	CTGATAGGTCATGCAT	AGAGTGGCAGGATCGA	GATCTAGCATTGGCGC	TCAGGTACACATGGGA	ATTATCCAGGCTAGGT	ATCGAGTGTCATGCAT	CACCAGGTCGTACCGG	GTAACGTGTCTTGATG	GTCTTCGTCAGTACGT	GTAACTGCACCAGGCT	GGTGTTAGTACAGACG	TGATTTCTCTTGTATC	TCGAGGCTCCGTACAA	ATCATCTAGCCAACAG	TATCAGGGTCTCAACA
[truncated: 5,000 more columns]

## Sheet: C. MSC cluster table
C. Table of MSC identified clusters. For each cluster in each row, it specifies its parent cluster, cluster compactness and size.
cluster.name	module.size	cluster.resolution	compactness.resolution	parent.cluster	compactness.parent	compactness.module	compactness.pvalue	intra.link.ratio	intra.link.pvalue	compactness.parent.infimum	is.compact	is.coherent	is.valid
M1	6	NA	1.81116	M0	Inf	0.164136	0	1	0	Inf	TRUE	TRUE	FALSE
M2	8147	NA	1.81116	M0	Inf	0.217004	0	1	0	Inf	TRUE	TRUE	TRUE
M3	2	NA	1.81116	M0	Inf	1.00436	0	1	0	Inf	TRUE	TRUE	FALSE
M4	2	NA	1.81116	M0	Inf	0.992725	0	1	0	Inf	TRUE	TRUE	FALSE
M5	2	NA	1.81116	M0	Inf	0.989218	0	1	0	Inf	TRUE	TRUE	FALSE
M6	9	NA	1.81116	M0	Inf	0.299678	0	1	0	Inf	TRUE	TRUE	FALSE
M7	2	NA	1.81116	M0	Inf	0.942347	0	1	0	Inf	TRUE	TRUE	FALSE
M8	2	NA	1.81116	M0	Inf	1.00752	0	1	0	Inf	TRUE	TRUE	FALSE
M9	3	NA	1.81116	M0	Inf	0.586237	0	1	0	Inf	TRUE	TRUE	FALSE
M10	2	NA	1.81116	M0	Inf	1.00946	0	1	0	Inf	TRUE	TRUE	FALSE
M11	2	NA	1.81116	M0	Inf	1.02375	0	1	0	Inf	TRUE	TRUE	FALSE
M12	2	NA	1.81116	M0	Inf	1.04998	0	1	0	Inf	TRUE	TRUE	FALSE
M13	1045	0.425	1.81116	M2	0.217004	0.121913	0	0.859975	0	0.217004	TRUE	TRUE	TRUE
M14	1109	0.425	1.81116	M2	0.217004	0.152241	0	0.973742	0	0.217004	TRUE	TRUE	TRUE
M15	2222	0.425	1.81116	M2	0.217004	0.107164	0	0.90785	0	0.217004	TRUE	TRUE	TRUE
M16	97	0.425	1.81116	M2	0.217004	0.162387	0	0.914554	0	0.217004	TRUE	TRUE	TRUE
M17	241	0.425	1.81116	M2	0.217004	0.0925634	0	0.917622	0	0.217004	TRUE	TRUE	TRUE
M18	213	0.425	1.81116	M2	0.217004	0.115402	0	0.974895	0	0.217004	TRUE	TRUE	TRUE
M19	64	0.425	1.81116	M2	0.217004	0.0734346	0	0.857523	0	0.217004	TRUE	TRUE	TRUE
M20	172	0.425	1.81116	M2	0.217004	0.16829	0	0.972699	0	0.217004	TRUE	TRUE	TRUE
M21	286	0.425	1.81116	M2	0.217004	0.106766	0	0.998807	0	0.217004	TRUE	TRUE	TRUE
M22	1126	0.425	1.81116	M2	0.217004	0.113863	0	0.959929	0	0.217004	TRUE	TRUE	TRUE
M23	1572	0.425	1.81116	M2	0.217004	0.0661358	0	0.945726	0	0.217004	TRUE	TRUE	TRUE
M24	79	0.3125	1.81116	M13	0.109071	0.284223	0.99	0.735751	0	0.121913	FALSE	TRUE	FALSE
M25	966	0.3125	1.81116	M13	0.109071	0.105927	0	0.973417	0	0.121913	TRUE	TRUE	TRUE
M26	20	0.675	1.81116	M14	0.139657	0.250054	0	0.666667	0	0.152241	FALSE	TRUE	FALSE
M27	210	0.675	1.81116	M14	0.139657	0.145207	0	0.754266	0	0.152241	TRUE	TRUE	TRUE
M28	140	0.675	1.81116	M14	0.139657	0.129099	0	0.779202	0	0.152241	TRUE	TRUE	TRUE
M29	211	0.675	1.81116	M14	0.139657	0.210841	0	0.618492	0	0.152241	FALSE	TRUE	FALSE
M30	303	0.675	1.81116	M14	0.139657	0.17974	0	0.754499	0	0.152241	FALSE	TRUE	FALSE
M31	225	0.675	1.81116	M14	0.139657	0.194318	0	0.737645	0	0.152241	FALSE	TRUE	FALSE
M32	838	0.45	1.81116	M15	0.0970572	0.0962876	0	0.853929	0	0.107164	TRUE	TRUE	TRUE
M33	1104	0.45	1.81116	M15	0.0970572	0.103244	0	0.865077	0	0.107164	TRUE	TRUE	TRUE
M34	280	0.45	1.81116	M15	0.0970572	0.218124	1	0.79661	0	0.107164	FALSE	TRUE	FALSE
M35	40	0.3875	1.81116	M16	0.162387	0.270734	0.99	0.786885	0	0.162387	FALSE	TRUE	FALSE
M36	57	0.3875	1.81116	M16	0.162387	0.143182	0	0.870432	0	0.162387	TRUE	TRUE	TRUE
M37	50	0.6875	1.81116	M17	0.0835469	0.10984	0	0.65625	0	0.0925634	FALSE	TRUE	FALSE
M38	38	0.6875	1.81116	M17	0.0835469	0.12686	0	0.693069	0	0.0925634	FALSE	TRUE	FALSE
M39	15	0.6875	1.81116	M17	0.0835469	0.218273	0.06	0.95122	0	0.0925634	FALSE	TRUE	FALSE
M40	79	0.6875	1.81116	M17	0.0835469	0.0689173	0	0.696121	0	0.0925634	TRUE	TRUE	TRUE
M41	59	0.6875	1.81116	M17	0.0835469	0.0950779	0	0.806569	0	0.0925634	FALSE	TRUE	FALSE
M42	74	0.3875	1.81116	M18	0.0828494	0.141296	1	0.752239	0	0.115402	FALSE	TRUE	FALSE
M43	139	0.3875	1.81116	M18	0.0828494	0.0722436	0	0.885042	0	0.115402	TRUE	TRUE	TRUE
M44	18	0.3375	1.81116	M20	0.136587	0.180352	0	0.813953	0	0.16829	FALSE	TRUE	FALSE
M45	42	0.3375	1.81116	M20	0.136587	0.223943	0.06	0.719212	0	0.16829	FALSE	TRUE	FALSE
M46	112	0.3375	1.81116	M20	0.136587	0.116603	0	0.879913	0	0.16829	TRUE	TRUE	TRUE
M47	41	0.2625	1.81116	M21	0.104546	0.145376	0	0.845679	0	0.106766	FALSE	TRUE	FALSE
M48	245	0.2625	1.81116	M21	0.104546	0.0916578	0	0.977477	0	0.106766	TRUE	TRUE	TRUE
M49	250	0.3625	1.81116	M22	0.113755	0.115414	0	0.823575	0	0.113863	FALSE	TRUE	FALSE
M50	506	0.3625	1.81116	M22	0.113755	0.110264	0	0.87956	0	0.113863	TRUE	TRUE	TRUE
M51	249	0.3625	1.81116	M22	0.113755	0.126831	0	0.824219	0	0.113863	FALSE	TRUE	FALSE
M52	121	0.3625	1.81116	M22	0.113755	0.116913	0	0.778675	0	0.113863	FALSE	TRUE	FALSE
M53	696	0.55	1.81116	M25	0.104835	0.0971863	0	0.896825	0	0.105927	TRUE	TRUE	TRUE
M54	270	0.55	1.81116	M25	0.104835	0.18838	1	0.736796	0	0.105927	FALSE	TRUE	FALSE
M55	67	0.525	1.81116	M27	0.111667	0.133258	0	0.678947	0	0.145207	TRUE	TRUE	TRUE
M56	69	0.525	1.81116	M27	0.111667	0.0992059	0	0.728125	0	0.145207	TRUE	TRUE	TRUE
M57	74	0.525	1.81116	M27	0.111667	0.212822	1	0.697059	0	0.145207	FALSE	TRUE	FALSE
M58	86	0.5	1.81116	M28	0.112643	0.11213	0	0.858639	0	0.129099	TRUE	TRUE	TRUE
M59	54	0.5	1.81116	M28	0.112643	0.141587	0	0.753425	0	0.129099	FALSE	TRUE	FALSE
M60	338	0.675	1.81116	M50	0.0957041	0.0895413	0	0.84	0	0.110264	TRUE	TRUE	TRUE
M61	144	0.675	1.81116	M50	0.0957041	0.169659	1	0.409449	0	0.110264	FALSE	TRUE	FALSE
M62	24	0.675	1.81116	M50	0.0957041	0.299194	0.23	0.674016	0	0.110264	FALSE	TRUE	FALSE
