# Supplementary material for: Unsupervised multi-scale clustering of single-cell transcriptomes to identify hierarchical structures of cell subtypes
Source: Research Square preprint supplement (doi:10.21203/rs.3.rs-5671748/v1), 2024-12-23
Supplement: Supplementary file 4 [file fa6d971f3b5d6ff4f1b8acdb.xlsx]

## Sheet: A. Lee et al. 2020 meta data
A. Meta data for individual cells from PBMC 8k data set. It includes inferred cell types in column, “inferred.cell.type.broad”, for major cell types from PBMC, and more specific subtypes in “inferred.cell.type.fine”.
orig.ident	nCount_RNA	nFeature_RNA	sample	barcode	title	geo_accession	age	cell.type	gender	subject.group	subject.status	percent.mt	nCount_SCT	nFeature_SCT	inferred.cell.type.fine	inferred.cell.type.broad	subject.group.name
toy	15679	3311	S1	AAACCCAAGGGCAATC-1	Sample 1_nCoV 1 scRNA-seq [SW103]	GSM4509011	63	PBMC	M	COVID-19 patient	severe COVID-19 patient	7.29638	2495	885	Non-switched memory B cells	B cells	severe COVID-19 patient
toy	3630	1146	S1	AAACCCACAGCTGAAG-1	Sample 1_nCoV 1 scRNA-seq [SW103]	GSM4509011	63	PBMC	M	COVID-19 patient	severe COVID-19 patient	13.168	2791	1139	Naive B cells	B cells	severe COVID-19 patient
toy	6796	1785	S1	AAACCCAGTCTTCGAA-1	Sample 1_nCoV 1 scRNA-seq [SW103]	GSM4509011	63	PBMC	M	COVID-19 patient	severe COVID-19 patient	3.5462	2744	1100	Th2 cells	CD8+ T cells	severe COVID-19 patient
toy	6803	2147	S1	AAACCCAGTTCCGCTT-1	Sample 1_nCoV 1 scRNA-seq [SW103]	GSM4509011	63	PBMC	M	COVID-19 patient	severe COVID-19 patient	7.3938	2757	1355	Classical monocytes	Monocytes	severe COVID-19 patient
toy	819	332	S1	AAACGAAAGGGAGGTG-1	Sample 1_nCoV 1 scRNA-seq [SW103]	GSM4509011	63	PBMC	M	COVID-19 patient	severe COVID-19 patient	2.3199	2049	382	HSC_-G-CSF	HSC_-G-CSF	severe COVID-19 patient
toy	1188	488	S1	AAACGAACAAGGTTGG-1	Sample 1_nCoV 1 scRNA-seq [SW103]	GSM4509011	63	PBMC	M	COVID-19 patient	severe COVID-19 patient	5.30303	2151	554	Platelets	Platelets	severe COVID-19 patient
toy	5444	1958	S1	AAACGAAGTCTACAAC-1	Sample 1_nCoV 1 scRNA-seq [SW103]	GSM4509011	63	PBMC	M	COVID-19 patient	severe COVID-19 patient	5.18001	3137	1766	Natural killer cells	NK cells	severe COVID-19 patient
toy	11649	2946	S1	AAACGCTAGGCTTAAA-1	Sample 1_nCoV 1 scRNA-seq [SW103]	GSM4509011	63	PBMC	M	COVID-19 patient	severe COVID-19 patient	9.22826	2574	1130	Classical monocytes	Monocytes	severe COVID-19 patient
toy	4568	1654	S1	AAACGCTCATGACCCG-1	Sample 1_nCoV 1 scRNA-seq [SW103]	GSM4509011	63	PBMC	M	COVID-19 patient	severe COVID-19 patient	11.2084	3012	1596	Non-Vd2 gd T cells	T cells	severe COVID-19 patient
toy	6303	2078	S1	AAACGCTGTACCGTGC-1	Sample 1_nCoV 1 scRNA-seq [SW103]	GSM4509011	63	PBMC	M	COVID-19 patient	severe COVID-19 patient	6.13993	2972	1524	Non-Vd2 gd T cells	T cells	severe COVID-19 patient
toy	5596	1932	S1	AAACGCTGTGAATGAT-1	Sample 1_nCoV 1 scRNA-seq [SW103]	GSM4509011	63	PBMC	M	COVID-19 patient	severe COVID-19 patient	9.81058	3098	1692	Classical monocytes	Monocytes	severe COVID-19 patient
toy	7130	2178	S1	AAACGCTTCACTGTTT-1	Sample 1_nCoV 1 scRNA-seq [SW103]	GSM4509011	63	PBMC	M	COVID-19 patient	severe COVID-19 patient	7.13885	2690	1231	Classical monocytes	Monocytes	severe COVID-19 patient
toy	8174	2472	S1	AAAGAACAGAAATTCG-1	Sample 1_nCoV 1 scRNA-seq [SW103]	GSM4509011	63	PBMC	M	COVID-19 patient	severe COVID-19 patient	7.02227	2356	984	Classical monocytes	Dendritic cells	severe COVID-19 patient
toy	4037	1391	S1	AAAGAACAGCCAAGTG-1	Sample 1_nCoV 1 scRNA-seq [SW103]	GSM4509011	63	PBMC	M	COVID-19 patient	severe COVID-19 patient	10.1065	2845	1379	Terminal effector CD4 T cells	T cells	severe COVID-19 patient
toy	1147	556	S1	AAAGAACAGGAGAGGC-1	Sample 1_nCoV 1 scRNA-seq [SW103]	GSM4509011	63	PBMC	M	COVID-19 patient	severe COVID-19 patient	3.74891	2152	616	Platelets	Platelets	severe COVID-19 patient
toy	1231	697	S1	AAAGAACAGGTAGTCG-1	Sample 1_nCoV 1 scRNA-seq [SW103]	GSM4509011	63	PBMC	M	COVID-19 patient	severe COVID-19 patient	11.6166	2173	712	Classical monocytes	Monocytes	severe COVID-19 patient
toy	4264	1589	S1	AAAGAACAGGTTCCAT-1	Sample 1_nCoV 1 scRNA-seq [SW103]	GSM4509011	63	PBMC	M	COVID-19 patient	severe COVID-19 patient	6.16792	2907	1568	Classical monocytes	Monocytes	severe COVID-19 patient
toy	5319	1772	S1	AAAGAACCAAGGTCTT-1	Sample 1_nCoV 1 scRNA-seq [SW103]	GSM4509011	63	PBMC	M	COVID-19 patient	severe COVID-19 patient	6.84339	3017	1575	Classical monocytes	Monocytes	severe COVID-19 patient
toy	10904	2159	S1	AAAGAACCACACGTGC-1	Sample 1_nCoV 1 scRNA-seq [SW103]	GSM4509011	63	PBMC	M	COVID-19 patient	severe COVID-19 patient	5.18158	2403	651	Th17 cells	CD4+ T cells	severe COVID-19 patient
toy	10544	2013	S1	AAAGAACCAGTTAAAG-1	Sample 1_nCoV 1 scRNA-seq [SW103]	GSM4509011	63	PBMC	M	COVID-19 patient	severe COVID-19 patient	2.65554	2422	614	Th1/Th17 cells	CD4+ T cells	severe COVID-19 patient
toy	6190	1660	S1	AAAGAACGTGATAGTA-1	Sample 1_nCoV 1 scRNA-seq [SW103]	GSM4509011	63	PBMC	M	COVID-19 patient	severe COVID-19 patient	8.86914	2898	1199	Terminal effector CD4 T cells	NK cells	severe COVID-19 patient
toy	14412	3477	S1	AAAGAACGTGGCACTC-1	Sample 1_nCoV 1 scRNA-seq [SW103]	GSM4509011	63	PBMC	M	COVID-19 patient	severe COVID-19 patient	6.01582	2625	1115	Classical monocytes	Monocytes	severe COVID-19 patient
toy	5648	1587	S1	AAAGAACTCATACGAC-1	Sample 1_nCoV 1 scRNA-seq [SW103]	GSM4509011	63	PBMC	M	COVID-19 patient	severe COVID-19 patient	2.03612	3177	1383	Platelets	Platelets	severe COVID-19 patient
toy	3742	1521	S1	AAAGGATAGAGTTCGG-1	Sample 1_nCoV 1 scRNA-seq [SW103]	GSM4509011	63	PBMC	M	COVID-19 patient	severe COVID-19 patient	9.54035	2876	1512	Natural killer cells	NK cells	severe COVID-19 patient
toy	6102	2057	S1	AAAGGATCAACAAGTA-1	Sample 1_nCoV 1 scRNA-seq [SW103]	GSM4509011	63	PBMC	M	COVID-19 patient	severe COVID-19 patient	6.70272	2978	1589	Classical monocytes	Monocytes	severe COVID-19 patient
toy	6165	1569	S1	AAAGGATCAAGACAAT-1	Sample 1_nCoV 1 scRNA-seq [SW103]	GSM4509011	63	PBMC	M	COVID-19 patient	severe COVID-19 patient	8.32117	2825	1121	Central memory CD8 T cells	CD8+ T cells	severe COVID-19 patient
toy	8519	2505	S1	AAAGGATCACATCATG-1	Sample 1_nCoV 1 scRNA-seq [SW103]	GSM4509011	63	PBMC	M	COVID-19 patient	severe COVID-19 patient	7.10177	2450	1050	Classical monocytes	Monocytes	severe COVID-19 patient
toy	4487	1639	S1	AAAGGATCAGCTGTAT-1	Sample 1_nCoV 1 scRNA-seq [SW103]	GSM4509011	63	PBMC	M	COVID-19 patient	severe COVID-19 patient	7.91175	2980	1603	Classical monocytes	Monocytes	severe COVID-19 patient
toy	6892	2332	S1	AAAGGATGTGATACCT-1	Sample 1_nCoV 1 scRNA-seq [SW103]	GSM4509011	63	PBMC	M	COVID-19 patient	severe COVID-19 patient	8.00929	2839	1516	Effector memory CD8 T cells	T cells	severe COVID-19 patient
toy	8902	2462	S1	AAAGGATTCTTCGACC-1	Sample 1_nCoV 1 scRNA-seq [SW103]	GSM4509011	63	PBMC	M	COVID-19 patient	severe COVID-19 patient	8.72838	2415	904	Switched memory B cells	B cells	severe COVID-19 patient
toy	8392	1754	S1	AAAGGGCAGAGCTTTC-1	Sample 1_nCoV 1 scRNA-seq [SW103]	GSM4509011	63	PBMC	M	COVID-19 patient	severe COVID-19 patient	5.6959	2409	641	T regulatory cells	CD4+ T cells	severe COVID-19 patient
toy	633	340	S1	AAAGGGCAGCACTCGC-1	Sample 1_nCoV 1 scRNA-seq [SW103]	GSM4509011	63	PBMC	M	COVID-19 patient	severe COVID-19 patient	15.6398	1905	442	HSC_-G-CSF	HSC_-G-CSF	severe COVID-19 patient
toy	5042	1717	S1	AAAGGGCAGTCTGCGC-1	Sample 1_nCoV 1 scRNA-seq [SW103]	GSM4509011	63	PBMC	M	COVID-19 patient	severe COVID-19 patient	12.5744	3026	1589	Classical monocytes	Monocytes	severe COVID-19 patient
toy	4265	1384	S1	AAAGGGCCACTCTCGT-1	Sample 1_nCoV 1 scRNA-seq [SW103]	GSM4509011	63	PBMC	M	COVID-19 patient	severe COVID-19 patient	10.8324	2896	1362	Terminal effector CD4 T cells	T cells	severe COVID-19 patient
toy	512	250	S1	AAAGGGCTCCCAGGCA-1	Sample 1_nCoV 1 scRNA-seq [SW103]	GSM4509011	63	PBMC	M	COVID-19 patient	severe COVID-19 patient	5.85938	1851	373	HSC_-G-CSF	HSC_-G-CSF	severe COVID-19 patient
toy	8279	1992	S1	AAAGGTAAGCCTAACT-1	Sample 1_nCoV 1 scRNA-seq [SW103]	GSM4509011	63	PBMC	M	COVID-19 patient	severe COVID-19 patient	7.76664	2401	733	Naive B cells	B cells	severe COVID-19 patient
toy	4739	1427	S1	AAAGGTACAGAGAATT-1	Sample 1_nCoV 1 scRNA-seq [SW103]	GSM4509011	63	PBMC	M	COVID-19 patient	severe COVID-19 patient	6.58367	2933	1346	Naive B cells	B cells	severe COVID-19 patient
toy	593	305	S1	AAAGGTAGTACGACAG-1	Sample 1_nCoV 1 scRNA-seq [SW103]	GSM4509011	63	PBMC	M	COVID-19 patient	severe COVID-19 patient	11.2985	1831	434	Platelets	Platelets	severe COVID-19 patient
toy	7499	1811	S1	AAAGTCCAGCAGGCAT-1	Sample 1_nCoV 1 scRNA-seq [SW103]	GSM4509011	63	PBMC	M	COVID-19 patient	severe COVID-19 patient	7.94773	2438	743	Switched memory B cells	B cells	severe COVID-19 patient
toy	5012	1622	S1	AAAGTCCCAGTTAGGG-1	Sample 1_nCoV 1 scRNA-seq [SW103]	GSM4509011	63	PBMC	M	COVID-19 patient	severe COVID-19 patient	6.50439	3007	1495	Natural killer cells	NK cells	severe COVID-19 patient
toy	818	326	S1	AAAGTCCCATATGGCT-1	Sample 1_nCoV 1 scRNA-seq [SW103]	GSM4509011	63	PBMC	M	COVID-19 patient	severe COVID-19 patient	4.40098	2000	405	HSC_-G-CSF	HSC_-G-CSF	severe COVID-19 patient
toy	4227	1420	S1	AAAGTCCGTCGTTATG-1	Sample 1_nCoV 1 scRNA-seq [SW103]	GSM4509011	63	PBMC	M	COVID-19 patient	severe COVID-19 patient	11.2609	2885	1393	Terminal effector CD8 T cells	T cells	severe COVID-19 patient
toy	12884	2461	S1	AAAGTGAAGCCGATTT-1	Sample 1_nCoV 1 scRNA-seq [SW103]	GSM4509011	63	PBMC	M	COVID-19 patient	severe COVID-19 patient	10.8196	2498	735	Naive B cells	B cells	severe COVID-19 patient
toy	4263	1627	S1	AAAGTGAAGTACGAGC-1	Sample 1_nCoV 1 scRNA-seq [SW103]	GSM4509011	63	PBMC	M	COVID-19 patient	severe COVID-19 patient	9.68801	2910	1602	Classical monocytes	Monocytes	severe COVID-19 patient
toy	17054	3817	S1	AAAGTGAAGTCATCCA-1	Sample 1_nCoV 1 scRNA-seq [SW103]	GSM4509011	63	PBMC	M	COVID-19 patient	severe COVID-19 patient	4.94899	2519	1161	Classical monocytes	Monocytes	severe COVID-19 patient
toy	364	280	S1	AAAGTGAAGTCTCTGA-1	Sample 1_nCoV 1 scRNA-seq [SW103]	GSM4509011	63	PBMC	M	COVID-19 patient	severe COVID-19 patient	4.94505	1729	429	NA	NA	severe COVID-19 patient
toy	851	298	S1	AAAGTGACAACCAACT-1	Sample 1_nCoV 1 scRNA-seq [SW103]	GSM4509011	63	PBMC	M	COVID-19 patient	severe COVID-19 patient	6.81551	2062	371	HSC_-G-CSF	HSC_-G-CSF	severe COVID-19 patient
toy	706	261	S1	AAAGTGAGTGAAGCTG-1	Sample 1_nCoV 1 scRNA-seq [SW103]	GSM4509011	63	PBMC	M	COVID-19 patient	severe COVID-19 patient	9.91501	1995	352	Platelets	Platelets	severe COVID-19 patient
toy	6008	1769	S1	AAAGTGAGTTTCGTAG-1	Sample 1_nCoV 1 scRNA-seq [SW103]	GSM4509011	63	PBMC	M	COVID-19 patient	severe COVID-19 patient	7.0739	2940	1388	T regulatory cells	CD4+ T cells	severe COVID-19 patient
toy	17108	4053	S1	AAAGTGATCTTGAACG-1	Sample 1_nCoV 1 scRNA-seq [SW103]	GSM4509011	63	PBMC	M	COVID-19 patient	severe COVID-19 patient	7.63386	2651	1353	Non-Vd2 gd T cells	T cells	severe COVID-19 patient
toy	6305	2160	S1	AAATGGACAAATCGTC-1	Sample 1_nCoV 1 scRNA-seq [SW103]	GSM4509011	63	PBMC	M	COVID-19 patient	severe COVID-19 patient	6.51864	2943	1585	Classical monocytes	Monocytes	severe COVID-19 patient
toy	8458	1989	S1	AAATGGACACAGCTTA-1	Sample 1_nCoV 1 scRNA-seq [SW103]	GSM4509011	63	PBMC	M	COVID-19 patient	severe COVID-19 patient	6.30173	2395	712	Naive B cells	B cells	severe COVID-19 patient
toy	7074	1771	S1	AAATGGATCGTGCATA-1	Sample 1_nCoV 1 scRNA-seq [SW103]	GSM4509011	63	PBMC	M	COVID-19 patient	severe COVID-19 patient	7.46395	2625	959	Naive B cells	B cells	severe COVID-19 patient
toy	679	297	S1	AACAAAGAGCTAGATA-1	Sample 1_nCoV 1 scRNA-seq [SW103]	GSM4509011	63	PBMC	M	COVID-19 patient	severe COVID-19 patient	5.00736	1924	408	HSC_-G-CSF	HSC_-G-CSF	severe COVID-19 patient
toy	1846	815	S1	AACAAAGGTATGGAAT-1	Sample 1_nCoV 1 scRNA-seq [SW103]	GSM4509011	63	PBMC	M	COVID-19 patient	severe COVID-19 patient	10.2384	2189	813	Non-switched memory B cells	B cells	severe COVID-19 patient
toy	12065	3118	S1	AACAAAGTCTACAGGT-1	Sample 1_nCoV 1 scRNA-seq [SW103]	GSM4509011	63	PBMC	M	COVID-19 patient	severe COVID-19 patient	9.33278	2618	1198	Vd2 gd T cells	CD8+ T cells	severe COVID-19 patient
toy	884	374	S1	AACAACCAGCCTAGGA-1	Sample 1_nCoV 1 scRNA-seq [SW103]	GSM4509011	63	PBMC	M	COVID-19 patient	severe COVID-19 patient	2.94118	2044	453	Platelets	Platelets	severe COVID-19 patient
toy	3064	1275	S1	AACAACCGTTCATCTT-1	Sample 1_nCoV 1 scRNA-seq [SW103]	GSM4509011	63	PBMC	M	COVID-19 patient	severe COVID-19 patient	5.90731	2734	1275	Classical monocytes	Monocytes	severe COVID-19 patient
toy	4178	1631	S1	AACAAGAAGAGGGCGA-1	Sample 1_nCoV 1 scRNA-seq [SW103]	GSM4509011	63	PBMC	M	COVID-19 patient	severe COVID-19 patient	8.09	2938	1615	Natural killer cells	NK cells	severe COVID-19 patient
toy	8593	2202	S1	AACAAGAAGGTCGTCC-1	Sample 1_nCoV 1 scRNA-seq [SW103]	GSM4509011	63	PBMC	M	COVID-19 patient	severe COVID-19 patient	8.23926	2364	764	Exhausted B cells	B cells	severe COVID-19 patient
toy	5751	2022	S1	AACAAGAAGTCATAGA-1	Sample 1_nCoV 1 scRNA-seq [SW103]	GSM4509011	63	PBMC	M	COVID-19 patient	severe COVID-19 patient	11.0937	3070	1722	Classical monocytes	Monocytes	severe COVID-19 patient
toy	4995	1709	S1	AACAAGAAGTCTCCTC-1	Sample 1_nCoV 1 scRNA-seq [SW103]	GSM4509011	63	PBMC	M	COVID-19 patient	severe COVID-19 patient	18.1381	3028	1588	Terminal effector CD4 T cells	T cells	severe COVID-19 patient
toy	8492	2092	S1	AACAAGAAGTGCTCGC-1	Sample 1_nCoV 1 scRNA-seq [SW103]	GSM4509011	63	PBMC	M	COVID-19 patient	severe COVID-19 patient	5.91145	2370	735	Switched memory B cells	B cells	severe COVID-19 patient
toy	16195	3595	S1	AACAAGAAGTTTGGCT-1	Sample 1_nCoV 1 scRNA-seq [SW103]	GSM4509011	63	PBMC	M	COVID-19 patient	severe COVID-19 patient	5.5017	2623	1189	Classical monocytes	Monocytes	severe COVID-19 patient
toy	12586	3129	S1	AACAAGAGTACAGAGC-1	Sample 1_nCoV 1 scRNA-seq [SW103]	GSM4509011	63	PBMC	M	COVID-19 patient	severe COVID-19 patient	6.19736	2729	1254	Vd2 gd T cells	T cells	severe COVID-19 patient
toy	749	265	S1	AACAAGAGTAGAATAC-1	Sample 1_nCoV 1 scRNA-seq [SW103]	GSM4509011	63	PBMC	M	COVID-19 patient	severe COVID-19 patient	12.283	2011	358	HSC_-G-CSF	HSC_-G-CSF	severe COVID-19 patient
toy	2564	1071	S1	AACAAGAGTGGCGTAA-1	Sample 1_nCoV 1 scRNA-seq [SW103]	GSM4509011	63	PBMC	M	COVID-19 patient	severe COVID-19 patient	7.6053	2522	1070	Classical monocytes	Monocytes	severe COVID-19 patient
toy	7024	2261	S1	AACAAGATCCCTAGGG-1	Sample 1_nCoV 1 scRNA-seq [SW103]	GSM4509011	63	PBMC	M	COVID-19 patient	severe COVID-19 patient	13.3827	2711	1314	Classical monocytes	Monocytes	severe COVID-19 patient
toy	4291	229	S1	AACAAGATCCTCACCA-1	Sample 1_nCoV 1 scRNA-seq [SW103]	GSM4509011	63	PBMC	M	COVID-19 patient	severe COVID-19 patient	0.605919	2931	186	Non-switched memory B cells	NA	severe COVID-19 patient
toy	2874	1171	S1	AACACACAGCAGGTCA-1	Sample 1_nCoV 1 scRNA-seq [SW103]	GSM4509011	63	PBMC	M	COVID-19 patient	severe COVID-19 patient	6.71538	2646	1170	Classical monocytes	Monocytes	severe COVID-19 patient
toy	12886	3133	S1	AACACACAGCGCAATG-1	Sample 1_nCoV 1 scRNA-seq [SW103]	GSM4509011	63	PBMC	M	COVID-19 patient	severe COVID-19 patient	9.30467	2653	1187	Intermediate monocytes	Monocytes	severe COVID-19 patient
toy	1578	405	S1	AACACACGTCCCTGAG-1	Sample 1_nCoV 1 scRNA-seq [SW103]	GSM4509011	63	PBMC	M	COVID-19 patient	severe COVID-19 patient	7.41445	2202	415	Platelets	Platelets	severe COVID-19 patient
toy	18073	4248	S1	AACACACTCAACACGT-1	Sample 1_nCoV 1 scRNA-seq [SW103]	GSM4509011	63	PBMC	M	COVID-19 patient	severe COVID-19 patient	6.81127	2531	1245	Classical monocytes	Monocytes	severe COVID-19 patient
toy	2834	213	S1	AACACACTCATCCTGC-1	Sample 1_nCoV 1 scRNA-seq [SW103]	GSM4509011	63	PBMC	M	COVID-19 patient	severe COVID-19 patient	3.17572	2590	211	Plasmablasts	NA	severe COVID-19 patient
toy	12029	3081	S1	AACACACTCGGAGTAG-1	Sample 1_nCoV 1 scRNA-seq [SW103]	GSM4509011	63	PBMC	M	COVID-19 patient	severe COVID-19 patient	6.10192	2693	1276	Classical monocytes	Monocytes	severe COVID-19 patient
toy	826	462	S1	AACACACTCTGAGGCC-1	Sample 1_nCoV 1 scRNA-seq [SW103]	GSM4509011	63	PBMC	M	COVID-19 patient	severe COVID-19 patient	4.84262	2038	506	MEP	MEP	severe COVID-19 patient
toy	1337	551	S1	AACAGGGCAAGGGCAT-1	Sample 1_nCoV 1 scRNA-seq [SW103]	GSM4509011	63	PBMC	M	COVID-19 patient	severe COVID-19 patient	8.07779	2062	605	Platelets	Platelets	severe COVID-19 patient
toy	9005	2489	S1	AACAGGGTCATGTCAG-1	Sample 1_nCoV 1 scRNA-seq [SW103]	GSM4509011	63	PBMC	M	COVID-19 patient	severe COVID-19 patient	8.5286	2482	1011	Classical monocytes	Monocytes	severe COVID-19 patient
toy	9352	2865	S1	AACCAACAGTCCTACA-1	Sample 1_nCoV 1 scRNA-seq [SW103]	GSM4509011	63	PBMC	M	COVID-19 patient	severe COVID-19 patient	5.30368	2452	1180	Classical monocytes	Monocytes	severe COVID-19 patient
toy	5612	1887	S1	AACCAACAGTGGATTA-1	Sample 1_nCoV 1 scRNA-seq [SW103]	GSM4509011	63	PBMC	M	COVID-19 patient	severe COVID-19 patient	6.89594	3050	1613	Classical monocytes	Monocytes	severe COVID-19 patient
toy	7321	1749	S1	AACCAACAGTGGCGAT-1	Sample 1_nCoV 1 scRNA-seq [SW103]	GSM4509011	63	PBMC	M	COVID-19 patient	severe COVID-19 patient	5.75058	2521	805	Non-switched memory B cells	B cells	severe COVID-19 patient
toy	11474	3196	S1	AACCAACCAATAACCC-1	Sample 1_nCoV 1 scRNA-seq [SW103]	GSM4509011	63	PBMC	M	COVID-19 patient	severe COVID-19 patient	8.57591	2554	1247	Classical monocytes	Monocytes	severe COVID-19 patient
toy	7226	1861	S1	AACCAACCACATAGCT-1	Sample 1_nCoV 1 scRNA-seq [SW103]	GSM4509011	63	PBMC	M	COVID-19 patient	severe COVID-19 patient	8.12344	2578	922	Naive B cells	B cells	severe COVID-19 patient
toy	4301	1346	S1	AACCAACGTCGGTACC-1	Sample 1_nCoV 1 scRNA-seq [SW103]	GSM4509011	63	PBMC	M	COVID-19 patient	severe COVID-19 patient	6.64962	2881	1321	Naive B cells	B cells	severe COVID-19 patient
toy	593	344	S1	AACCAACGTGTACATC-1	Sample 1_nCoV 1 scRNA-seq [SW103]	GSM4509011	63	PBMC	M	COVID-19 patient	severe COVID-19 patient	3.87858	1751	473	Platelets	Platelets	severe COVID-19 patient
toy	520	303	S1	AACCAACTCGACACTA-1	Sample 1_nCoV 1 scRNA-seq [SW103]	GSM4509011	63	PBMC	M	COVID-19 patient	severe COVID-19 patient	6.15385	1748	431	HSC_-G-CSF	HSC_-G-CSF	severe COVID-19 patient
toy	6274	2077	S1	AACCACAAGAATCTAG-1	Sample 1_nCoV 1 scRNA-seq [SW103]	GSM4509011	63	PBMC	M	COVID-19 patient	severe COVID-19 patient	7.85783	2943	1561	Classical monocytes	Monocytes	severe COVID-19 patient
toy	5600	1448	S1	AACCACAAGTTCCATG-1	Sample 1_nCoV 1 scRNA-seq [SW103]	GSM4509011	63	PBMC	M	COVID-19 patient	severe COVID-19 patient	9.03571	2915	1207	Non-switched memory B cells	B cells	severe COVID-19 patient
toy	4741	1734	S1	AACCACATCGCCTCTA-1	Sample 1_nCoV 1 scRNA-seq [SW103]	GSM4509011	63	PBMC	M	COVID-19 patient	severe COVID-19 patient	8.14174	3035	1665	Classical monocytes	Monocytes	severe COVID-19 patient
toy	1386	724	S1	AACCATGAGTAACGAT-1	Sample 1_nCoV 1 scRNA-seq [SW103]	GSM4509011	63	PBMC	M	COVID-19 patient	severe COVID-19 patient	9.30736	2047	757	Low-density neutrophils	Monocytes	severe COVID-19 patient
toy	2745	1138	S1	AACCATGCACACGCCA-1	Sample 1_nCoV 1 scRNA-seq [SW103]	GSM4509011	63	PBMC	M	COVID-19 patient	severe COVID-19 patient	9.79964	2606	1138	Classical monocytes	Monocytes	severe COVID-19 patient
toy	749	311	S1	AACCATGCAGAATCGG-1	Sample 1_nCoV 1 scRNA-seq [SW103]	GSM4509011	63	PBMC	M	COVID-19 patient	severe COVID-19 patient	5.74099	1959	413	HSC_-G-CSF	HSC_-G-CSF	severe COVID-19 patient
toy	4653	1751	S1	AACCATGCATGTCGTA-1	Sample 1_nCoV 1 scRNA-seq [SW103]	GSM4509011	63	PBMC	M	COVID-19 patient	severe COVID-19 patient	14.6142	3036	1689	Classical monocytes	Monocytes	severe COVID-19 patient
toy	13619	3164	S1	AACCATGGTGGATCGA-1	Sample 1_nCoV 1 scRNA-seq [SW103]	GSM4509011	63	PBMC	M	COVID-19 patient	severe COVID-19 patient	8.31192	2580	1148	Classical monocytes	Monocytes	severe COVID-19 patient
toy	5352	1407	S1	AACCATGTCACCCTGT-1	Sample 1_nCoV 1 scRNA-seq [SW103]	GSM4509011	63	PBMC	M	COVID-19 patient	severe COVID-19 patient	6.63303	2932	1236	Naive B cells	B cells	severe COVID-19 patient
toy	505	203	S1	AACCATGTCCACTTTA-1	Sample 1_nCoV 1 scRNA-seq [SW103]	GSM4509011	63	PBMC	M	COVID-19 patient	severe COVID-19 patient	14.8515	1907	341	HSC_-G-CSF	HSC_-G-CSF	severe COVID-19 patient
toy	5479	1974	S1	AACCCAAAGTCACACT-1	Sample 1_nCoV 1 scRNA-seq [SW103]	GSM4509011	63	PBMC	M	COVID-19 patient	severe COVID-19 patient	5.87698	3102	1749	Classical monocytes	Monocytes	severe COVID-19 patient
toy	1094	456	S1	AACCCAATCCGATGTA-1	Sample 1_nCoV 1 scRNA-seq [SW103]	GSM4509011	63	PBMC	M	COVID-19 patient	severe COVID-19 patient	10.6033	2170	527	Platelets	Platelets	severe COVID-19 patient
toy	8385	2262	S1	AACCCAATCGCCTATC-1	Sample 1_nCoV 1 scRNA-seq [SW103]	GSM4509011	63	PBMC	M	COVID-19 patient	severe COVID-19 patient	4.29338	2372	828	Th2 cells	CD8+ T cells	severe COVID-19 patient
toy	6613	1490	S1	AACCTGAAGTCATGAA-1	Sample 1_nCoV 1 scRNA-seq [SW103]	GSM4509011	63	PBMC	M	COVID-19 patient	severe COVID-19 patient	4.88432	3001	1052	Platelets	Platelets	severe COVID-19 patient
toy	4120	1363	S1	AACCTTTGTGTTACAC-1	Sample 1_nCoV 1 scRNA-seq [SW103]	GSM4509011	63	PBMC	M	COVID-19 patient	severe COVID-19 patient	10.7039	2868	1335	Vd2 gd T cells	NK cells	severe COVID-19 patient
toy	9829	1920	S1	AACCTTTTCGCCCAGA-1	Sample 1_nCoV 1 scRNA-seq [SW103]	GSM4509011	63	PBMC	M	COVID-19 patient	severe COVID-19 patient	3.82541	2858	811	Platelets	Platelets	severe COVID-19 patient
toy	3961	1446	S1	AACGAAAGTACTTCCC-1	Sample 1_nCoV 1 scRNA-seq [SW103]	GSM4509011	63	PBMC	M	COVID-19 patient	severe COVID-19 patient	8.48271	2862	1428	Natural killer cells	NK cells	severe COVID-19 patient
toy	13799	3213	S1	AACGAAAGTAGGACTG-1	Sample 1_nCoV 1 scRNA-seq [SW103]	GSM4509011	63	PBMC	M	COVID-19 patient	severe COVID-19 patient	9.21806	2510	1058	Classical monocytes	Monocytes	severe COVID-19 patient
toy	4004	1474	S1	AACGAAAGTGAATGTA-1	Sample 1_nCoV 1 scRNA-seq [SW103]	GSM4509011	63	PBMC	M	COVID-19 patient	severe COVID-19 patient	6.69331	2844	1463	Classical monocytes	Monocytes	severe COVID-19 patient
toy	1702	689	S1	AACGAAATCAAGTGTC-1	Sample 1_nCoV 1 scRNA-seq [SW103]	GSM4509011	63	PBMC	M	COVID-19 patient	severe COVID-19 patient	8.16686	2118	688	Platelets	Platelets	severe COVID-19 patient
toy	9701	2086	S1	AACGGGACAACCAGAG-1	Sample 1_nCoV 1 scRNA-seq [SW103]	GSM4509011	63	PBMC	M	COVID-19 patient	severe COVID-19 patient	9.62787	2384	652	Naive B cells	B cells	severe COVID-19 patient
toy	5807	1963	S1	AACGGGAGTCTAGGCC-1	Sample 1_nCoV 1 scRNA-seq [SW103]	GSM4509011	63	PBMC	M	COVID-19 patient	severe COVID-19 patient	6.02721	3069	1650	Natural killer cells	NK cells	severe COVID-19 patient
toy	12431	2251	S1	AACGGGAGTGTTCCTC-1	Sample 1_nCoV 1 scRNA-seq [SW103]	GSM4509011	63	PBMC	M	COVID-19 patient	severe COVID-19 patient	6.87797	2420	595	Non-switched memory B cells	B cells	severe COVID-19 patient
toy	8648	1897	S1	AACGGGATCACATTGG-1	Sample 1_nCoV 1 scRNA-seq [SW103]	GSM4509011	63	PBMC	M	COVID-19 patient	severe COVID-19 patient	4.40564	2385	667	Naive CD8 T cells	CD8+ T cells	severe COVID-19 patient
toy	498	242	S1	AACGTCAAGTTTCAGC-1	Sample 1_nCoV 1 scRNA-seq [SW103]	GSM4509011	63	PBMC	M	COVID-19 patient	severe COVID-19 patient	8.43373	1858	387	HSC_-G-CSF	HSC_-G-CSF	severe COVID-19 patient
toy	4019	1562	S1	AACGTCAGTATGAAGT-1	Sample 1_nCoV 1 scRNA-seq [SW103]	GSM4509011	63	PBMC	M	COVID-19 patient	severe COVID-19 patient	9.75367	2898	1545	Natural killer cells	NK cells	severe COVID-19 patient
toy	5193	1769	S1	AACGTCAGTGGCTCTG-1	Sample 1_nCoV 1 scRNA-seq [SW103]	GSM4509011	63	PBMC	M	COVID-19 patient	severe COVID-19 patient	8.26112	3023	1597	Classical monocytes	Monocytes	severe COVID-19 patient
toy	493	305	S1	AACGTCATCCCTCATG-1	Sample 1_nCoV 1 scRNA-seq [SW103]	GSM4509011	63	PBMC	M	COVID-19 patient	severe COVID-19 patient	6.28803	1767	438	HSC_-G-CSF	HSC_-G-CSF	severe COVID-19 patient
toy	5944	1788	S1	AACTTCTCACGGTGCT-1	Sample 1_nCoV 1 scRNA-seq [SW103]	GSM4509011	63	PBMC	M	COVID-19 patient	severe COVID-19 patient	6.69583	2967	1415	Natural killer cells	NK cells	severe COVID-19 patient
toy	8431	2482	S1	AACTTCTCATAATGAG-1	Sample 1_nCoV 1 scRNA-seq [SW103]	GSM4509011	63	PBMC	M	COVID-19 patient	severe COVID-19 patient	5.91863	2453	1032	Effector memory CD8 T cells	T cells	severe COVID-19 patient
toy	2208	1003	S1	AACTTCTGTCAGTCGC-1	Sample 1_nCoV 1 scRNA-seq [SW103]	GSM4509011	63	PBMC	M	COVID-19 patient	severe COVID-19 patient	6.20471	2314	1003	Classical monocytes	Monocytes	severe COVID-19 patient
toy	4234	1655	S1	AACTTCTGTGATACTC-1	Sample 1_nCoV 1 scRNA-seq [SW103]	GSM4509011	63	PBMC	M	COVID-19 patient	severe COVID-19 patient	8.45536	2943	1639	Classical monocytes	Monocytes	severe COVID-19 patient
toy	6340	1588	S1	AAGAACAAGTAGACAT-1	Sample 1_nCoV 1 scRNA-seq [SW103]	GSM4509011	63	PBMC	M	COVID-19 patient	severe COVID-19 patient	7.46057	2812	1093	Naive B cells	B cells	severe COVID-19 patient
toy	7696	1918	S1	AAGAACACACCGTCTT-1	Sample 1_nCoV 1 scRNA-seq [SW103]	GSM4509011	63	PBMC	M	COVID-19 patient	severe COVID-19 patient	6.26299	2433	799	Th2 cells	CD4+ T cells	severe COVID-19 patient
toy	8201	2228	S1	AAGAACAGTAGTCTTG-1	Sample 1_nCoV 1 scRNA-seq [SW103]	GSM4509011	63	PBMC	M	COVID-19 patient	severe COVID-19 patient	4.91403	2379	883	Classical monocytes	Monocytes	severe COVID-19 patient
toy	587	338	S1	AAGAACAGTTAGAAGT-1	Sample 1_nCoV 1 scRNA-seq [SW103]	GSM4509011	63	PBMC	M	COVID-19 patient	severe COVID-19 patient	2.04429	1877	429	NA	NA	severe COVID-19 patient
toy	12423	3254	S1	AAGAACATCACGGTCG-1	Sample 1_nCoV 1 scRNA-seq [SW103]	GSM4509011	63	PBMC	M	COVID-19 patient	severe COVID-19 patient	5.94059	2609	1288	Classical monocytes	Monocytes	severe COVID-19 patient
toy	12960	3326	S1	AAGAACATCCAAAGGG-1	Sample 1_nCoV 1 scRNA-seq [SW103]	GSM4509011	63	PBMC	M	COVID-19 patient	severe COVID-19 patient	7.33796	2548	1202	Classical monocytes	Monocytes	severe COVID-19 patient
toy	621	317	S1	AAGAACATCCTACGAA-1	Sample 1_nCoV 1 scRNA-seq [SW103]	GSM4509011	63	PBMC	M	COVID-19 patient	severe COVID-19 patient	12.3994	1852	436	Platelets	Platelets	severe COVID-19 patient
toy	8296	2448	S1	AAGACAAGTATCGTAC-1	Sample 1_nCoV 1 scRNA-seq [SW103]	GSM4509011	63	PBMC	M	COVID-19 patient	severe COVID-19 patient	11.5116	2426	1022	Classical monocytes	Monocytes	severe COVID-19 patient
toy	7727	2256	S1	AAGACTCCAGGCTCTG-1	Sample 1_nCoV 1 scRNA-seq [SW103]	GSM4509011	63	PBMC	M	COVID-19 patient	severe COVID-19 patient	7.54497	2424	1001	Classical monocytes	Monocytes	severe COVID-19 patient
toy	8551	2092	S1	AAGACTCGTACTGTTG-1	Sample 1_nCoV 1 scRNA-seq [SW103]	GSM4509011	63	PBMC	M	COVID-19 patient	severe COVID-19 patient	9.2153	2391	722	Non-switched memory B cells	B cells	severe COVID-19 patient
toy	573	383	S1	AAGACTCGTTGGGTAG-1	Sample 1_nCoV 1 scRNA-seq [SW103]	GSM4509011	63	PBMC	M	COVID-19 patient	severe COVID-19 patient	10.9948	1828	480	Natural killer cells	NA	severe COVID-19 patient
toy	6476	2111	S1	AAGACTCGTTTCGACA-1	Sample 1_nCoV 1 scRNA-seq [SW103]	GSM4509011	63	PBMC	M	COVID-19 patient	severe COVID-19 patient	8.13774	2859	1478	Classical monocytes	Monocytes	severe COVID-19 patient
toy	6587	2062	S1	AAGCATCAGCATGCGA-1	Sample 1_nCoV 1 scRNA-seq [SW103]	GSM4509011	63	PBMC	M	COVID-19 patient	severe COVID-19 patient	8.42569	2914	1405	Naive B cells	B cells	severe COVID-19 patient
toy	944	473	S1	AAGCATCAGCTGAAGC-1	Sample 1_nCoV 1 scRNA-seq [SW103]	GSM4509011	63	PBMC	M	COVID-19 patient	severe COVID-19 patient	7.09746	2146	499	NA	NA	severe COVID-19 patient
toy	8512	1884	S1	AAGCATCAGGAACTCG-1	Sample 1_nCoV 1 scRNA-seq [SW103]	GSM4509011	63	PBMC	M	COVID-19 patient	severe COVID-19 patient	8.48214	2393	658	Naive B cells	B cells	severe COVID-19 patient
toy	9067	618	S1	AAGCATCAGTCACAGG-1	Sample 1_nCoV 1 scRNA-seq [SW103]	GSM4509011	63	PBMC	M	COVID-19 patient	severe COVID-19 patient	0.275725	3347	188	Erythroblast	Erythroblast	severe COVID-19 patient
toy	489	252	S1	AAGCATCCAACACAGG-1	Sample 1_nCoV 1 scRNA-seq [SW103]	GSM4509011	63	PBMC	M	COVID-19 patient	severe COVID-19 patient	9.40695	1848	392	HSC_-G-CSF	HSC_-G-CSF	severe COVID-19 patient
toy	493	238	S1	AAGCATCCACATTCGA-1	Sample 1_nCoV 1 scRNA-seq [SW103]	GSM4509011	63	PBMC	M	COVID-19 patient	severe COVID-19 patient	16.6329	1843	377	HSC_-G-CSF	HSC_-G-CSF	severe COVID-19 patient
toy	12636	2984	S1	AAGCATCGTCTACTGA-1	Sample 1_nCoV 1 scRNA-seq [SW103]	GSM4509011	63	PBMC	M	COVID-19 patient	severe COVID-19 patient	7.44698	2552	997	Non-switched memory B cells	B cells	severe COVID-19 patient
toy	5039	1442	S1	AAGCATCGTGCCTATA-1	Sample 1_nCoV 1 scRNA-seq [SW103]	GSM4509011	63	PBMC	M	COVID-19 patient	severe COVID-19 patient	6.50923	2937	1298	Terminal effector CD4 T cells	T cells	severe COVID-19 patient
toy	4484	1304	S1	AAGCATCGTTGTGGCC-1	Sample 1_nCoV 1 scRNA-seq [SW103]	GSM4509011	63	PBMC	M	COVID-19 patient	severe COVID-19 patient	6.44514	2885	1252	Naive B cells	B cells	severe COVID-19 patient
toy	16857	3721	S1	AAGCCATAGAAGCCTG-1	Sample 1_nCoV 1 scRNA-seq [SW103]	GSM4509011	63	PBMC	M	COVID-19 patient	severe COVID-19 patient	6.81616	2499	1045	Intermediate monocytes	Monocytes	severe COVID-19 patient
toy	7101	2012	S1	AAGCCATAGATGCTAA-1	Sample 1_nCoV 1 scRNA-seq [SW103]	GSM4509011	63	PBMC	M	COVID-19 patient	severe COVID-19 patient	8.19603	2577	1064	Naive B cells	NA	severe COVID-19 patient
toy	9941	2799	S1	AAGCCATCACGACCTG-1	Sample 1_nCoV 1 scRNA-seq [SW103]	GSM4509011	63	PBMC	M	COVID-19 patient	severe COVID-19 patient	4.83855	2441	1079	Classical monocytes	Monocytes	severe COVID-19 patient
toy	4393	1590	S1	AAGCCATCAGAGCTAG-1	Sample 1_nCoV 1 scRNA-seq [SW103]	GSM4509011	63	PBMC	M	COVID-19 patient	severe COVID-19 patient	7.87617	2973	1558	Natural killer cells	NK cells	severe COVID-19 patient
toy	6199	1950	S1	AAGCCATCAGTCGCAC-1	Sample 1_nCoV 1 scRNA-seq [SW103]	GSM4509011	63	PBMC	M	COVID-19 patient	severe COVID-19 patient	12.3568	2892	1425	Classical monocytes	Monocytes	severe COVID-19 patient
toy	7061	2014	S1	AAGCCATGTAAGATCA-1	Sample 1_nCoV 1 scRNA-seq [SW103]	GSM4509011	63	PBMC	M	COVID-19 patient	severe COVID-19 patient	7.19445	2726	1135	Switched memory B cells	B cells	severe COVID-19 patient
toy	6900	1472	S1	AAGCCATGTATCGATC-1	Sample 1_nCoV 1 scRNA-seq [SW103]	GSM4509011	63	PBMC	M	COVID-19 patient	severe COVID-19 patient	5.85507	2668	865	Naive CD4 T cells	CD4+ T cells	severe COVID-19 patient
toy	5468	1605	S1	AAGCCATGTGAGGAAA-1	Sample 1_nCoV 1 scRNA-seq [SW103]	GSM4509011	63	PBMC	M	COVID-19 patient	severe COVID-19 patient	7.58961	2985	1389	Naive B cells	B cells	severe COVID-19 patient
toy	731	372	S1	AAGCCATGTGGAACCA-1	Sample 1_nCoV 1 scRNA-seq [SW103]	GSM4509011	63	PBMC	M	COVID-19 patient	severe COVID-19 patient	6.56635	1878	464	Platelets	Platelets	severe COVID-19 patient
toy	5848	1458	S1	AAGCCATGTGTCCCTT-1	Sample 1_nCoV 1 scRNA-seq [SW103]	GSM4509011	63	PBMC	M	COVID-19 patient	severe COVID-19 patient	6.17305	2874	1126	Naive B cells	B cells	severe COVID-19 patient
toy	7760	1927	S1	AAGCCATGTTAGGGTG-1	Sample 1_nCoV 1 scRNA-seq [SW103]	GSM4509011	63	PBMC	M	COVID-19 patient	severe COVID-19 patient	4.48454	2415	768	Th2 cells	CD4+ T cells	severe COVID-19 patient
toy	10363	2051	S1	AAGCGAGAGGCGAAGG-1	Sample 1_nCoV 1 scRNA-seq [SW103]	GSM4509011	63	PBMC	M	COVID-19 patient	severe COVID-19 patient	5.45209	2380	610	Th2 cells	CD4+ T cells	severe COVID-19 patient
toy	4327	1561	S1	AAGCGAGAGTTCCGTA-1	Sample 1_nCoV 1 scRNA-seq [SW103]	GSM4509011	63	PBMC	M	COVID-19 patient	severe COVID-19 patient	10.3305	2945	1535	Natural killer cells	NK cells	severe COVID-19 patient
toy	597	349	S1	AAGCGAGCAAGCACCC-1	Sample 1_nCoV 1 scRNA-seq [SW103]	GSM4509011	63	PBMC	M	COVID-19 patient	severe COVID-19 patient	10.0503	1871	442	NA	NA	severe COVID-19 patient
toy	8309	1901	S1	AAGCGAGCAGCGGTCT-1	Sample 1_nCoV 1 scRNA-seq [SW103]	GSM4509011	63	PBMC	M	COVID-19 patient	severe COVID-19 patient	10.1697	2391	689	Exhausted B cells	B cells	severe COVID-19 patient
toy	1587	785	S1	AAGCGAGCATGTCAGT-1	Sample 1_nCoV 1 scRNA-seq [SW103]	GSM4509011	63	PBMC	M	COVID-19 patient	severe COVID-19 patient	17.5803	2112	785	Classical monocytes	Monocytes	severe COVID-19 patient
toy	6183	2188	S1	AAGCGAGCATTAGGCT-1	Sample 1_nCoV 1 scRNA-seq [SW103]	GSM4509011	63	PBMC	M	COVID-19 patient	severe COVID-19 patient	11.9845	2970	1653	Classical monocytes	Monocytes	severe COVID-19 patient
toy	573	325	S1	AAGCGAGGTATTAAGG-1	Sample 1_nCoV 1 scRNA-seq [SW103]	GSM4509011	63	PBMC	M	COVID-19 patient	severe COVID-19 patient	9.24956	1787	464	Platelets	Platelets	severe COVID-19 patient
toy	708	391	S1	AAGCGAGGTTAACCTG-1	Sample 1_nCoV 1 scRNA-seq [SW103]	GSM4509011	63	PBMC	M	COVID-19 patient	severe COVID-19 patient	0.988701	1949	446	NA	NA	severe COVID-19 patient
toy	11826	2794	S1	AAGCGTTAGCATGGGT-1	Sample 1_nCoV 1 scRNA-seq [SW103]	GSM4509011	63	PBMC	M	COVID-19 patient	severe COVID-19 patient	5.7585	2449	899	Th2 cells	CD4+ T cells	severe COVID-19 patient
toy	951	435	S1	AAGCGTTCAAAGGCTG-1	Sample 1_nCoV 1 scRNA-seq [SW103]	GSM4509011	63	PBMC	M	COVID-19 patient	severe COVID-19 patient	3.04942	2052	512	Platelets	Platelets	severe COVID-19 patient
toy	6647	1651	S1	AAGCGTTCATGAAAGT-1	Sample 1_nCoV 1 scRNA-seq [SW103]	GSM4509011	63	PBMC	M	COVID-19 patient	severe COVID-19 patient	7.80803	2750	1052	Non-switched memory B cells	B cells	severe COVID-19 patient
toy	15334	3777	S1	AAGGAATAGACCATTC-1	Sample 1_nCoV 1 scRNA-seq [SW103]	GSM4509011	63	PBMC	M	COVID-19 patient	severe COVID-19 patient	10.9365	2505	1180	Classical monocytes	Monocytes	severe COVID-19 patient
toy	16038	3487	S1	AAGGAATCAGGTTTAC-1	Sample 1_nCoV 1 scRNA-seq [SW103]	GSM4509011	63	PBMC	M	COVID-19 patient	severe COVID-19 patient	5.11286	2530	1107	Classical monocytes	Monocytes	severe COVID-19 patient
toy	4282	256	S1	AAGGAATCATTGGATC-1	Sample 1_nCoV 1 scRNA-seq [SW103]	GSM4509011	63	PBMC	M	COVID-19 patient	severe COVID-19 patient	0.934143	2919	214	Erythroblast	Erythroblast	severe COVID-19 patient
toy	755	332	S1	AAGGAATGTTCTAACG-1	Sample 1_nCoV 1 scRNA-seq [SW103]	GSM4509011	63	PBMC	M	COVID-19 patient	severe COVID-19 patient	14.4371	1967	431	Platelets	Platelets	severe COVID-19 patient
toy	4937	1443	S1	AAGGAATGTTTCGGCG-1	Sample 1_nCoV 1 scRNA-seq [SW103]	GSM4509011	63	PBMC	M	COVID-19 patient	severe COVID-19 patient	11.2416	2930	1320	Vd2 gd T cells	T cells	severe COVID-19 patient
toy	8010	1897	S1	AAGGAATTCCCAGGAC-1	Sample 1_nCoV 1 scRNA-seq [SW103]	GSM4509011	63	PBMC	M	COVID-19 patient	severe COVID-19 patient	7.39076	2381	680	Naive B cells	B cells	severe COVID-19 patient
toy	1112	477	S1	AAGGTAAAGTTTGAGA-1	Sample 1_nCoV 1 scRNA-seq [SW103]	GSM4509011	63	PBMC	M	COVID-19 patient	severe COVID-19 patient	5.39568	2170	542	Platelets	Platelets	severe COVID-19 patient
toy	10611	2949	S1	AAGGTAACAGCTCATA-1	Sample 1_nCoV 1 scRNA-seq [SW103]	GSM4509011	63	PBMC	M	COVID-19 patient	severe COVID-19 patient	7.57704	2464	1129	Classical monocytes	Monocytes	severe COVID-19 patient
toy	10060	2574	S1	AAGGTAATCCAAACCA-1	Sample 1_nCoV 1 scRNA-seq [SW103]	GSM4509011	63	PBMC	M	COVID-19 patient	severe COVID-19 patient	8.75746	2511	1043	Classical monocytes	Monocytes	severe COVID-19 patient
toy	568	261	S1	AAGTACCAGGCGCTCT-1	Sample 1_nCoV 1 scRNA-seq [SW103]	GSM4509011	63	PBMC	M	COVID-19 patient	severe COVID-19 patient	5.80986	1881	384	HSC_-G-CSF	HSC_-G-CSF	severe COVID-19 patient
toy	9350	2762	S1	AAGTACCCAATTTCCT-1	Sample 1_nCoV 1 scRNA-seq [SW103]	GSM4509011	63	PBMC	M	COVID-19 patient	severe COVID-19 patient	4.52406	2455	1093	Classical monocytes	Monocytes	severe COVID-19 patient
toy	519	236	S1	AAGTACCCATAATCGC-1	Sample 1_nCoV 1 scRNA-seq [SW103]	GSM4509011	63	PBMC	M	COVID-19 patient	severe COVID-19 patient	17.341	1872	374	HSC_-G-CSF	HSC_-G-CSF	severe COVID-19 patient
toy	6083	1547	S1	AAGTACCGTACAGGTG-1	Sample 1_nCoV 1 scRNA-seq [SW103]	GSM4509011	63	PBMC	M	COVID-19 patient	severe COVID-19 patient	6.52639	2866	1169	Naive B cells	B cells	severe COVID-19 patient
toy	5664	1781	S1	AAGTACCGTTCTGAGT-1	Sample 1_nCoV 1 scRNA-seq [SW103]	GSM4509011	63	PBMC	M	COVID-19 patient	severe COVID-19 patient	11.6525	3025	1513	Vd2 gd T cells	T cells	severe COVID-19 patient
toy	4009	1590	S1	AAGTACCTCCTTGAAG-1	Sample 1_nCoV 1 scRNA-seq [SW103]	GSM4509011	63	PBMC	M	COVID-19 patient	severe COVID-19 patient	11.4243	2905	1567	Natural killer cells	NK cells	severe COVID-19 patient
toy	7102	1666	S1	AAGTCGTCAAACGGCA-1	Sample 1_nCoV 1 scRNA-seq [SW103]	GSM4509011	63	PBMC	M	COVID-19 patient	severe COVID-19 patient	10.0113	2607	876	Switched memory B cells	B cells	severe COVID-19 patient
toy	9744	2544	S1	AAGTCGTGTATGCGGA-1	Sample 1_nCoV 1 scRNA-seq [SW103]	GSM4509011	63	PBMC	M	COVID-19 patient	severe COVID-19 patient	7.461	2474	1016	Classical monocytes	Monocytes	severe COVID-19 patient
toy	5499	1487	S1	AAGTCGTGTCGAGCAA-1	Sample 1_nCoV 1 scRNA-seq [SW103]	GSM4509011	63	PBMC	M	COVID-19 patient	severe COVID-19 patient	7.21949	2899	1250	Th2 cells	CD4+ T cells	severe COVID-19 patient
toy	11254	2876	S1	AAGTCGTTCAGCACCG-1	Sample 1_nCoV 1 scRNA-seq [SW103]	GSM4509011	63	PBMC	M	COVID-19 patient	severe COVID-19 patient	8.4681	2565	1132	Classical monocytes	Monocytes	severe COVID-19 patient
toy	12946	3095	S1	AAGTGAACACAGCGCT-1	Sample 1_nCoV 1 scRNA-seq [SW103]	GSM4509011	63	PBMC	M	COVID-19 patient	severe COVID-19 patient	5.07493	2611	1158	Classical monocytes	Monocytes	severe COVID-19 patient
toy	5062	1741	S1	AAGTGAACATCGATCA-1	Sample 1_nCoV 1 scRNA-seq [SW103]	GSM4509011	63	PBMC	M	COVID-19 patient	severe COVID-19 patient	7.90202	3037	1611	Classical monocytes	Monocytes	severe COVID-19 patient
toy	9374	2578	S1	AAGTGAATCATGAGGG-1	Sample 1_nCoV 1 scRNA-seq [SW103]	GSM4509011	63	PBMC	M	COVID-19 patient	severe COVID-19 patient	8.21421	2476	1025	Effector memory CD8 T cells	T cells	severe COVID-19 patient
toy	2383	209	S1	AAGTTCGAGCATACTC-1	Sample 1_nCoV 1 scRNA-seq [SW103]	GSM4509011	63	PBMC	M	COVID-19 patient	severe COVID-19 patient	1.63659	2417	209	Plasmablasts	B cells	severe COVID-19 patient
toy	6141	2026	S1	AAGTTCGAGGCACTCC-1	Sample 1_nCoV 1 scRNA-seq [SW103]	GSM4509011	63	PBMC	M	COVID-19 patient	severe COVID-19 patient	9.73783	2950	1511	Classical monocytes	Monocytes	severe COVID-19 patient
toy	4884	1607	S1	AAGTTCGAGGTTAGTA-1	Sample 1_nCoV 1 scRNA-seq [SW103]	GSM4509011	63	PBMC	M	COVID-19 patient	severe COVID-19 patient	10.3604	2994	1496	Terminal effector CD8 T cells	T cells	severe COVID-19 patient
toy	583	279	S1	AAGTTCGCACATCCCT-1	Sample 1_nCoV 1 scRNA-seq [SW103]	GSM4509011	63	PBMC	M	COVID-19 patient	severe COVID-19 patient	6.86106	1866	396	HSC_-G-CSF	HSC_-G-CSF	severe COVID-19 patient
toy	3659	1330	S1	AAGTTCGGTCCCGTGA-1	Sample 1_nCoV 1 scRNA-seq [SW103]	GSM4509011	63	PBMC	M	COVID-19 patient	severe COVID-19 patient	8.9642	2838	1322	Classical monocytes	Monocytes	severe COVID-19 patient
toy	2435	728	S1	AAGTTCGTCACCATCC-1	Sample 1_nCoV 1 scRNA-seq [SW103]	GSM4509011	63	PBMC	M	COVID-19 patient	severe COVID-19 patient	3.86037	2433	725	Platelets	Platelets	severe COVID-19 patient
toy	16591	4063	S1	AAGTTCGTCACGACTA-1	Sample 1_nCoV 1 scRNA-seq [SW103]	GSM4509011	63	PBMC	M	COVID-19 patient	severe COVID-19 patient	7.12434	2545	1272	NA	Monocytes	severe COVID-19 patient
toy	23629	4432	S1	AAGTTCGTCTGTCCCA-1	Sample 1_nCoV 1 scRNA-seq [SW103]	GSM4509011	63	PBMC	M	COVID-19 patient	severe COVID-19 patient	6.12806	2330	862	Myeloid dendritic cells	Monocytes	severe COVID-19 patient
toy	937	392	S1	AATAGAGAGGGTTAGC-1	Sample 1_nCoV 1 scRNA-seq [SW103]	GSM4509011	63	PBMC	M	COVID-19 patient	severe COVID-19 patient	6.72359	2076	452	HSC_-G-CSF	HSC_-G-CSF	severe COVID-19 patient
toy	8605	2211	S1	AATAGAGCACAATCTG-1	Sample 1_nCoV 1 scRNA-seq [SW103]	GSM4509011	63	PBMC	M	COVID-19 patient	severe COVID-19 patient	6.77513	2350	748	Exhausted B cells	B cells	severe COVID-19 patient
toy	870	314	S1	AATAGAGCATTACGGT-1	Sample 1_nCoV 1 scRNA-seq [SW103]	GSM4509011	63	PBMC	M	COVID-19 patient	severe COVID-19 patient	7.81609	2061	387	Platelets	Platelets	severe COVID-19 patient
toy	15315	3585	S1	AATAGAGGTCCTACGG-1	Sample 1_nCoV 1 scRNA-seq [SW103]	GSM4509011	63	PBMC	M	COVID-19 patient	severe COVID-19 patient	7.45674	2553	1153	Classical monocytes	Monocytes	severe COVID-19 patient
toy	4736	1285	S1	AATAGAGGTGTGAGCA-1	Sample 1_nCoV 1 scRNA-seq [SW103]	GSM4509011	63	PBMC	M	COVID-19 patient	severe COVID-19 patient	12.8167	2889	1205	Switched memory B cells	B cells	severe COVID-19 patient
toy	12165	2919	S1	AATAGAGTCAAGGACG-1	Sample 1_nCoV 1 scRNA-seq [SW103]	GSM4509011	63	PBMC	M	COVID-19 patient	severe COVID-19 patient	6.19811	2418	850	MEP	MEP	severe COVID-19 patient
toy	7438	2219	S1	AATAGAGTCAGGAAGC-1	Sample 1_nCoV 1 scRNA-seq [SW103]	GSM4509011	63	PBMC	M	COVID-19 patient	severe COVID-19 patient	7.71713	2499	1043	Classical monocytes	Monocytes	severe COVID-19 patient
toy	3534	1504	S1	AATAGAGTCCATTGGA-1	Sample 1_nCoV 1 scRNA-seq [SW103]	GSM4509011	63	PBMC	M	COVID-19 patient	severe COVID-19 patient	7.97963	2878	1500	Natural killer cells	NK cells	severe COVID-19 patient
toy	688	324	S1	AATCACGAGATGACCG-1	Sample 1_nCoV 1 scRNA-seq [SW103]	GSM4509011	63	PBMC	M	COVID-19 patient	severe COVID-19 patient	13.3721	1897	427	Platelets	Platelets	severe COVID-19 patient
toy	5340	1410	S1	AATCACGAGTAACCTC-1	Sample 1_nCoV 1 scRNA-seq [SW103]	GSM4509011	63	PBMC	M	COVID-19 patient	severe COVID-19 patient	8.85768	2943	1243	Naive CD4 T cells	CD4+ T cells	severe COVID-19 patient
toy	19583	3835	S1	AATCACGCATGTGACT-1	Sample 1_nCoV 1 scRNA-seq [SW103]	GSM4509011	63	PBMC	M	COVID-19 patient	severe COVID-19 patient	6.83246	2369	817	NA	NA	severe COVID-19 patient
toy	6982	2251	S1	AATCACGGTCTAACTG-1	Sample 1_nCoV 1 scRNA-seq [SW103]	GSM4509011	63	PBMC	M	COVID-19 patient	severe COVID-19 patient	10.7706	2734	1369	Classical monocytes	Monocytes	severe COVID-19 patient
toy	5074	1803	S1	AATCGACAGGTAGATT-1	Sample 1_nCoV 1 scRNA-seq [SW103]	GSM4509011	63	PBMC	M	COVID-19 patient	severe COVID-19 patient	13.4214	3064	1675	Classical monocytes	Monocytes	severe COVID-19 patient
toy	2327	837	S1	AATCGACCAACTGATC-1	Sample 1_nCoV 1 scRNA-seq [SW103]	GSM4509011	63	PBMC	M	COVID-19 patient	severe COVID-19 patient	3.09411	2361	835	Platelets	Platelets	severe COVID-19 patient
toy	849	334	S1	AATCGACGTACCAATC-1	Sample 1_nCoV 1 scRNA-seq [SW103]	GSM4509011	63	PBMC	M	COVID-19 patient	severe COVID-19 patient	10.0118	2031	421	Platelets	Platelets	severe COVID-19 patient
toy	973	202	S1	AATCGACTCGGTGAAG-1	Sample 1_nCoV 1 scRNA-seq [SW103]	GSM4509011	63	PBMC	M	COVID-19 patient	severe COVID-19 patient	5.54985	1926	288	NA	NA	severe COVID-19 patient
toy	2264	950	S1	AATCGACTCTCGTCAC-1	Sample 1_nCoV 1 scRNA-seq [SW103]	GSM4509011	63	PBMC	M	COVID-19 patient	severe COVID-19 patient	17.0936	2342	950	Classical monocytes	Monocytes	severe COVID-19 patient
toy	9610	2658	S1	AATCGTGAGCAGAAAG-1	Sample 1_nCoV 1 scRNA-seq [SW103]	GSM4509011	63	PBMC	M	COVID-19 patient	severe COVID-19 patient	8.37669	2460	1060	Classical monocytes	Monocytes	severe COVID-19 patient
toy	26385	4096	S1	AATCGTGAGTGCAGGT-1	Sample 1_nCoV 1 scRNA-seq [SW103]	GSM4509011	63	PBMC	M	COVID-19 patient	severe COVID-19 patient	5.41975	2321	683	Switched memory B cells	B cells	severe COVID-19 patient
toy	6783	2109	S1	AATCGTGCACTCCTTG-1	Sample 1_nCoV 1 scRNA-seq [SW103]	GSM4509011	63	PBMC	M	COVID-19 patient	severe COVID-19 patient	5.63173	2748	1329	Classical monocytes	Monocytes	severe COVID-19 patient
toy	550	226	S1	AATCGTGTCACGACTA-1	Sample 1_nCoV 1 scRNA-seq [SW103]	GSM4509011	63	PBMC	M	COVID-19 patient	severe COVID-19 patient	14.7273	1892	358	HSC_-G-CSF	HSC_-G-CSF	severe COVID-19 patient
toy	541	231	S1	AATCGTGTCCCTTGGT-1	Sample 1_nCoV 1 scRNA-seq [SW103]	GSM4509011	63	PBMC	M	COVID-19 patient	severe COVID-19 patient	13.1238	1877	371	HSC_-G-CSF	HSC_-G-CSF	severe COVID-19 patient
toy	12037	2995	S1	AATCGTGTCTCGACGG-1	Sample 1_nCoV 1 scRNA-seq [SW103]	GSM4509011	63	PBMC	M	COVID-19 patient	severe COVID-19 patient	11.772	2527	1095	Classical monocytes	Monocytes	severe COVID-19 patient
toy	7360	1692	S1	AATGAAGAGATGTAGT-1	Sample 1_nCoV 1 scRNA-seq [SW103]	GSM4509011	63	PBMC	M	COVID-19 patient	severe COVID-19 patient	4.71467	2493	744	Naive CD4 T cells	CD4+ T cells	severe COVID-19 patient
toy	307	240	S1	AATGAAGAGTTGCCTA-1	Sample 1_nCoV 1 scRNA-seq [SW103]	GSM4509011	63	PBMC	M	COVID-19 patient	severe COVID-19 patient	7.81759	1666	405	Exhausted B cells	NA	severe COVID-19 patient
toy	4872	1325	S1	AATGAAGCAATTTCCT-1	Sample 1_nCoV 1 scRNA-seq [SW103]	GSM4509011	63	PBMC	M	COVID-19 patient	severe COVID-19 patient	6.46552	2901	1223	Naive B cells	B cells	severe COVID-19 patient
toy	16360	3571	S1	AATGAAGCACGTCATA-1	Sample 1_nCoV 1 scRNA-seq [SW103]	GSM4509011	63	PBMC	M	COVID-19 patient	severe COVID-19 patient	8.34352	2528	1084	Classical monocytes	Monocytes	severe COVID-19 patient
toy	403	304	S1	AATGAAGTCGTGCGAC-1	Sample 1_nCoV 1 scRNA-seq [SW103]	GSM4509011	63	PBMC	M	COVID-19 patient	severe COVID-19 patient	6.45161	1764	445	NA	NA	severe COVID-19 patient
toy	4568	1583	S1	AATGACCAGAAGCTCG-1	Sample 1_nCoV 1 scRNA-seq [SW103]	GSM4509011	63	PBMC	M	COVID-19 patient	severe COVID-19 patient	7.9028	2973	1530	Vd2 gd T cells	T cells	severe COVID-19 patient
toy	14742	3486	S1	AATGACCAGGTCCCTG-1	Sample 1_nCoV 1 scRNA-seq [SW103]	GSM4509011	63	PBMC	M	COVID-19 patient	severe COVID-19 patient	7.50916	2573	1182	Classical monocytes	Monocytes	severe COVID-19 patient
toy	1156	462	S1	AATGACCCAGAAGCGT-1	Sample 1_nCoV 1 scRNA-seq [SW103]	GSM4509011	63	PBMC	M	COVID-19 patient	severe COVID-19 patient	7.78547	2185	521	HSC_-G-CSF	HSC_-G-CSF	severe COVID-19 patient
toy	9822	2738	S1	AATGACCCATGTTTGG-1	Sample 1_nCoV 1 scRNA-seq [SW103]	GSM4509011	63	PBMC	M	COVID-19 patient	severe COVID-19 patient	5.9662	2471	1071	Classical monocytes	Monocytes	severe COVID-19 patient
toy	740	431	S1	AATGACCGTGCAATAA-1	Sample 1_nCoV 1 scRNA-seq [SW103]	GSM4509011	63	PBMC	M	COVID-19 patient	severe COVID-19 patient	3.78378	1863	540	Platelets	Platelets	severe COVID-19 patient
toy	9096	2661	S1	AATGACCGTGTCATCA-1	Sample 1_nCoV 1 scRNA-seq [SW103]	GSM4509011	63	PBMC	M	COVID-19 patient	severe COVID-19 patient	7.10202	2403	1024	Intermediate monocytes	Monocytes	severe COVID-19 patient
toy	4977	1408	S1	AATGACCTCTAAGAAG-1	Sample 1_nCoV 1 scRNA-seq [SW103]	GSM4509011	63	PBMC	M	COVID-19 patient	severe COVID-19 patient	6.55013	2946	1292	Naive B cells	B cells	severe COVID-19 patient
toy	641	253	S1	AATGCCAGTGTTAGCT-1	Sample 1_nCoV 1 scRNA-seq [SW103]	GSM4509011	63	PBMC	M	COVID-19 patient	severe COVID-19 patient	17.6287	1928	366	HSC_-G-CSF	HSC_-G-CSF	severe COVID-19 patient
toy	2272	994	S1	AATGCCATCCTCTTTC-1	Sample 1_nCoV 1 scRNA-seq [SW103]	GSM4509011	63	PBMC	M	COVID-19 patient	severe COVID-19 patient	9.72711	2338	993	Classical monocytes	Monocytes	severe COVID-19 patient
toy	7103	1598	S1	AATGGAAAGAAGCCTG-1	Sample 1_nCoV 1 scRNA-seq [SW103]	GSM4509011	63	PBMC	M	COVID-19 patient	severe COVID-19 patient	11.4599	2598	830	Naive B cells	B cells	severe COVID-19 patient
toy	479	291	S1	AATGGAAAGAGTCACG-1	Sample 1_nCoV 1 scRNA-seq [SW103]	GSM4509011	63	PBMC	M	COVID-19 patient	severe COVID-19 patient	1.67015	1762	444	Myeloid dendritic cells	NA	severe COVID-19 patient
toy	10943	2383	S1	AATGGAAAGCAATAGT-1	Sample 1_nCoV 1 scRNA-seq [SW103]	GSM4509011	63	PBMC	M	COVID-19 patient	severe COVID-19 patient	5.73883	2404	738	Central memory CD8 T cells	CD8+ T cells	severe COVID-19 patient
toy	12752	3214	S1	AATGGAAAGTAACGAT-1	Sample 1_nCoV 1 scRNA-seq [SW103]	GSM4509011	63	PBMC	M	COVID-19 patient	severe COVID-19 patient	8.12422	2560	1197	Classical monocytes	Monocytes	severe COVID-19 patient
toy	611	246	S1	AATGGAACAAAGGATT-1	Sample 1_nCoV 1 scRNA-seq [SW103]	GSM4509011	63	PBMC	M	COVID-19 patient	severe COVID-19 patient	15.8756	1957	349	HSC_-G-CSF	HSC_-G-CSF	severe COVID-19 patient
toy	6935	1919	S1	AATGGAACAATAGGGC-1	Sample 1_nCoV 1 scRNA-seq [SW103]	GSM4509011	63	PBMC	M	COVID-19 patient	severe COVID-19 patient	11.6655	2699	1109	Th1/Th17 cells	T cells	severe COVID-19 patient
toy	1865	810	S1	AATGGAACACATACTG-1	Sample 1_nCoV 1 scRNA-seq [SW103]	GSM4509011	63	PBMC	M	COVID-19 patient	severe COVID-19 patient	1.60858	2197	810	Low-density neutrophils	Neutrophils	severe COVID-19 patient
toy	5341	231	S1	AATGGAACATCGTTCC-1	Sample 1_nCoV 1 scRNA-seq [SW103]	GSM4509011	63	PBMC	M	COVID-19 patient	severe COVID-19 patient	1.01105	3116	160	Erythroblast	Erythroblast	severe COVID-19 patient
toy	11448	3037	S1	AATGGAAGTCCTCCAT-1	Sample 1_nCoV 1 scRNA-seq [SW103]	GSM4509011	63	PBMC	M	COVID-19 patient	severe COVID-19 patient	4.66457	2527	1162	Classical monocytes	Monocytes	severe COVID-19 patient
toy	478	310	S1	AATGGAAGTGCCCGTA-1	Sample 1_nCoV 1 scRNA-seq [SW103]	GSM4509011	63	PBMC	M	COVID-19 patient	severe COVID-19 patient	11.5063	1866	428	NA	NA	severe COVID-19 patient
toy	650	303	S1	AATGGAAGTGCCGAAA-1	Sample 1_nCoV 1 scRNA-seq [SW103]	GSM4509011	63	PBMC	M	COVID-19 patient	severe COVID-19 patient	6.92308	1845	436	Platelets	Platelets	severe COVID-19 patient
toy	3341	1328	S1	AATGGCTCACTGTCGG-1	Sample 1_nCoV 1 scRNA-seq [SW103]	GSM4509011	63	PBMC	M	COVID-19 patient	severe COVID-19 patient	12.0323	2784	1326	Classical monocytes	Monocytes	severe COVID-19 patient
toy	5626	1972	S1	AATGGCTCAGTCGCTG-1	Sample 1_nCoV 1 scRNA-seq [SW103]	GSM4509011	63	PBMC	M	COVID-19 patient	severe COVID-19 patient	9.26058	3089	1716	Classical monocytes	Monocytes	severe COVID-19 patient
toy	648	289	S1	AATTCCTAGGATGGCT-1	Sample 1_nCoV 1 scRNA-seq [SW103]	GSM4509011	63	PBMC	M	COVID-19 patient	severe COVID-19 patient	12.3457	1915	393	Platelets	Platelets	severe COVID-19 patient
toy	802	355	S1	AATTCCTAGTGAATAC-1	Sample 1_nCoV 1 scRNA-seq [SW103]	GSM4509011	63	PBMC	M	COVID-19 patient	severe COVID-19 patient	6.48379	1968	439	Platelets	Platelets	severe COVID-19 patient
toy	683	292	S1	AATTCCTCAGTACTAC-1	Sample 1_nCoV 1 scRNA-seq [SW103]	GSM4509011	63	PBMC	M	COVID-19 patient	severe COVID-19 patient	16.3982	1935	401	Platelets	Platelets	severe COVID-19 patient
toy	5899	1846	S1	AATTCCTTCCGCGAGT-1	Sample 1_nCoV 1 scRNA-seq [SW103]	GSM4509011	63	PBMC	M	COVID-19 patient	severe COVID-19 patient	5.62807	2966	1471	Th1 cells	CD4+ T cells	severe COVID-19 patient
toy	7408	2311	S1	AATTTCCGTAGCGTTT-1	Sample 1_nCoV 1 scRNA-seq [SW103]	GSM4509011	63	PBMC	M	COVID-19 patient	severe COVID-19 patient	5.38607	2576	1138	Vd2 gd T cells	T cells	severe COVID-19 patient
toy	7345	2385	S1	AATTTCCGTATCTCTT-1	Sample 1_nCoV 1 scRNA-seq [SW103]	GSM4509011	63	PBMC	M	COVID-19 patient	severe COVID-19 patient	6.49421	2533	1194	Classical monocytes	Monocytes	severe COVID-19 patient
toy	7005	1619	S1	ACAAAGACAGAACTCT-1	Sample 1_nCoV 1 scRNA-seq [SW103]	GSM4509011	63	PBMC	M	COVID-19 patient	severe COVID-19 patient	4.71092	2853	882	Naive B cells	B cells	severe COVID-19 patient
toy	8947	2215	S1	ACAAAGACATCCGTTC-1	Sample 1_nCoV 1 scRNA-seq [SW103]	GSM4509011	63	PBMC	M	COVID-19 patient	severe COVID-19 patient	7.32089	2368	737	Naive B cells	B cells	severe COVID-19 patient
toy	7253	2317	S1	ACAAAGACATTGACTG-1	Sample 1_nCoV 1 scRNA-seq [SW103]	GSM4509011	63	PBMC	M	COVID-19 patient	severe COVID-19 patient	6.48008	2553	1197	Classical monocytes	Monocytes	severe COVID-19 patient
toy	277	201	S1	ACAAAGAGTACGGCAA-1	Sample 1_nCoV 1 scRNA-seq [SW103]	GSM4509011	63	PBMC	M	COVID-19 patient	severe COVID-19 patient	2.16606	1681	387	NA	Dendritic cells	severe COVID-19 patient
toy	1815	640	S1	ACAAAGAGTGACAGCA-1	Sample 1_nCoV 1 scRNA-seq [SW103]	GSM4509011	63	PBMC	M	COVID-19 patient	severe COVID-19 patient	2.92011	2184	640	Platelets	Platelets	severe COVID-19 patient
toy	3109	1093	S1	ACAAAGAGTGCCCAGT-1	Sample 1_nCoV 1 scRNA-seq [SW103]	GSM4509011	63	PBMC	M	COVID-19 patient	severe COVID-19 patient	9.71373	2689	1093	Naive CD4 T cells	CD4+ T cells	severe COVID-19 patient
toy	23184	4010	S1	ACAAAGAGTTGCTAGT-1	Sample 1_nCoV 1 scRNA-seq [SW103]	GSM4509011	63	PBMC	M	COVID-19 patient	severe COVID-19 patient	8.26432	2474	896	Myeloid dendritic cells	Dendritic cells	severe COVID-19 patient
toy	818	405	S1	ACAAAGATCCATCAGA-1	Sample 1_nCoV 1 scRNA-seq [SW103]	GSM4509011	63	PBMC	M	COVID-19 patient	severe COVID-19 patient	6.47922	1923	508	Platelets	Platelets	severe COVID-19 patient
toy	4268	1672	S1	ACAAAGATCTAGTACG-1	Sample 1_nCoV 1 scRNA-seq [SW103]	GSM4509011	63	PBMC	M	COVID-19 patient	severe COVID-19 patient	4.75633	2946	1654	Classical monocytes	Monocytes	severe COVID-19 patient
toy	32021	5124	S1	ACAACCAGTCACGCTG-1	Sample 1_nCoV 1 scRNA-seq [SW103]	GSM4509011	63	PBMC	M	COVID-19 patient	severe COVID-19 patient	6.91109	2734	1292	Effector memory CD8 T cells	CD8+ T cells	severe COVID-19 patient
toy	7057	1799	S1	ACAACCAGTGCCGTAC-1	Sample 1_nCoV 1 scRNA-seq [SW103]	GSM4509011	63	PBMC	M	COVID-19 patient	severe COVID-19 patient	5.35638	2672	999	Exhausted B cells	B cells	severe COVID-19 patient
toy	426	277	S1	ACAACCAGTTCCAGGC-1	Sample 1_nCoV 1 scRNA-seq [SW103]	GSM4509011	63	PBMC	M	COVID-19 patient	severe COVID-19 patient	6.33803	1858	407	Intermediate monocytes	NA	severe COVID-19 patient
toy	6119	2121	S1	ACAACCATCCTGTACC-1	Sample 1_nCoV 1 scRNA-seq [SW103]	GSM4509011	63	PBMC	M	COVID-19 patient	severe COVID-19 patient	9.29891	3044	1639	Natural killer cells	NK cells	severe COVID-19 patient
toy	4942	232	S1	ACAAGCTAGCTAAGTA-1	Sample 1_nCoV 1 scRNA-seq [SW103]	GSM4509011	63	PBMC	M	COVID-19 patient	severe COVID-19 patient	0.38446	3059	178	Erythroblast	Erythroblast	severe COVID-19 patient
toy	5133	1611	S1	ACAAGCTAGTGCGTCC-1	Sample 1_nCoV 1 scRNA-seq [SW103]	GSM4509011	63	PBMC	M	COVID-19 patient	severe COVID-19 patient	9.1954	3011	1468	Naive B cells	B cells	severe COVID-19 patient
toy	15510	3488	S1	ACAAGCTCACCCTCTA-1	Sample 1_nCoV 1 scRNA-seq [SW103]	GSM4509011	63	PBMC	M	COVID-19 patient	severe COVID-19 patient	4.70019	2494	969	Central memory CD8 T cells	NA	severe COVID-19 patient
toy	1938	839	S1	ACAAGCTTCAGACCGC-1	Sample 1_nCoV 1 scRNA-seq [SW103]	GSM4509011	63	PBMC	M	COVID-19 patient	severe COVID-19 patient	8.15273	2227	839	NA	NA	severe COVID-19 patient
toy	12801	3144	S1	ACAAGCTTCATACGAC-1	Sample 1_nCoV 1 scRNA-seq [SW103]	GSM4509011	63	PBMC	M	COVID-19 patient	severe COVID-19 patient	6.39794	2464	960	Vd2 gd T cells	NA	severe COVID-19 patient
toy	572	283	S1	ACAAGCTTCCCTGTTG-1	Sample 1_nCoV 1 scRNA-seq [SW103]	GSM4509011	63	PBMC	M	COVID-19 patient	severe COVID-19 patient	4.8951	1821	422	HSC_-G-CSF	HSC_-G-CSF	severe COVID-19 patient
toy	9270	2763	S1	ACAAGCTTCGGTCAGC-1	Sample 1_nCoV 1 scRNA-seq [SW103]	GSM4509011	63	PBMC	M	COVID-19 patient	severe COVID-19 patient	7.72384	2391	1045	Classical monocytes	Monocytes	severe COVID-19 patient
toy	1962	269	S1	ACAAGCTTCTTTGCGC-1	Sample 1_nCoV 1 scRNA-seq [SW103]	GSM4509011	63	PBMC	M	COVID-19 patient	severe COVID-19 patient	9.42915	2239	269	Erythroblast	Erythroblast	severe COVID-19 patient
toy	9599	2668	S1	ACACAGTAGCCTGTCG-1	Sample 1_nCoV 1 scRNA-seq [SW103]	GSM4509011	63	PBMC	M	COVID-19 patient	severe COVID-19 patient	9.98021	2431	1030	Classical monocytes	Monocytes	severe COVID-19 patient
toy	3532	1508	S1	ACACAGTAGTGTAGAT-1	Sample 1_nCoV 1 scRNA-seq [SW103]	GSM4509011	63	PBMC	M	COVID-19 patient	severe COVID-19 patient	19.7055	2888	1500	Classical monocytes	Monocytes	severe COVID-19 patient
toy	9922	2764	S1	ACACAGTCAATCGAAA-1	Sample 1_nCoV 1 scRNA-seq [SW103]	GSM4509011	63	PBMC	M	COVID-19 patient	severe COVID-19 patient	6.67204	2433	1060	Classical monocytes	Monocytes	severe COVID-19 patient
toy	9618	2495	S1	ACACAGTGTTGCCGCA-1	Sample 1_nCoV 1 scRNA-seq [SW103]	GSM4509011	63	PBMC	M	COVID-19 patient	severe COVID-19 patient	3.57663	2391	879	Th1 cells	CD4+ T cells	severe COVID-19 patient
toy	11302	2910	S1	ACACAGTTCATTACCT-1	Sample 1_nCoV 1 scRNA-seq [SW103]	GSM4509011	63	PBMC	M	COVID-19 patient	severe COVID-19 patient	6.90143	2557	1106	Classical monocytes	Monocytes	severe COVID-19 patient
toy	12230	2577	S1	ACACCAAAGGGAGGCA-1	Sample 1_nCoV 1 scRNA-seq [SW103]	GSM4509011	63	PBMC	M	COVID-19 patient	severe COVID-19 patient	7.0646	2514	851	Non-switched memory B cells	B cells	severe COVID-19 patient
toy	2015	920	S1	ACACCAACACAAGCCC-1	Sample 1_nCoV 1 scRNA-seq [SW103]	GSM4509011	63	PBMC	M	COVID-19 patient	severe COVID-19 patient	14.6898	2238	920	Classical monocytes	Monocytes	severe COVID-19 patient
toy	3952	1312	S1	ACACCAAGTACTGAGG-1	Sample 1_nCoV 1 scRNA-seq [SW103]	GSM4509011	63	PBMC	M	COVID-19 patient	severe COVID-19 patient	5.5415	2845	1306	Naive B cells	B cells	severe COVID-19 patient
toy	922	494	S1	ACACCAAGTTGCTGAT-1	Sample 1_nCoV 1 scRNA-seq [SW103]	GSM4509011	63	PBMC	M	COVID-19 patient	severe COVID-19 patient	18.7636	2083	569	Classical monocytes	Monocytes	severe COVID-19 patient
toy	32886	5431	S1	ACACCAATCAGAGTGG-1	Sample 1_nCoV 1 scRNA-seq [SW103]	GSM4509011	63	PBMC	M	COVID-19 patient	severe COVID-19 patient	7.79359	2533	1081	MEP	MEP	severe COVID-19 patient
toy	4146	1209	S1	ACACGCGAGAGGTATT-1	Sample 1_nCoV 1 scRNA-seq [SW103]	GSM4509011	63	PBMC	M	COVID-19 patient	severe COVID-19 patient	10.3473	2817	1186	Naive B cells	B cells	severe COVID-19 patient
toy	12404	3046	S1	ACACGCGAGCAGGCAT-1	Sample 1_nCoV 1 scRNA-seq [SW103]	GSM4509011	63	PBMC	M	COVID-19 patient	severe COVID-19 patient	6.62689	2584	1152	Classical monocytes	Monocytes	severe COVID-19 patient
toy	4695	1701	S1	ACACGCGAGTTGGCTT-1	Sample 1_nCoV 1 scRNA-seq [SW103]	GSM4509011	63	PBMC	M	COVID-19 patient	severe COVID-19 patient	6.49627	3041	1632	Natural killer cells	NK cells	severe COVID-19 patient
toy	12961	3312	S1	ACACGCGCAAAGGCTG-1	Sample 1_nCoV 1 scRNA-seq [SW103]	GSM4509011	63	PBMC	M	COVID-19 patient	severe COVID-19 patient	8.487	2545	1130	Intermediate monocytes	Monocytes	severe COVID-19 patient
toy	1293	677	S1	ACACGCGCATCGTGCG-1	Sample 1_nCoV 1 scRNA-seq [SW103]	GSM4509011	63	PBMC	M	COVID-19 patient	severe COVID-19 patient	18.4841	2090	695	Classical monocytes	Monocytes	severe COVID-19 patient
toy	3531	267	S1	ACACGCGGTAACTTCG-1	Sample 1_nCoV 1 scRNA-seq [SW103]	GSM4509011	63	PBMC	M	COVID-19 patient	severe COVID-19 patient	1.33107	2770	232	Erythroblast	Erythroblast	severe COVID-19 patient
toy	6866	2235	S1	ACACGCGGTTAAAGTG-1	Sample 1_nCoV 1 scRNA-seq [SW103]	GSM4509011	63	PBMC	M	COVID-19 patient	severe COVID-19 patient	5.92776	2806	1414	Central memory CD8 T cells	T cells	severe COVID-19 patient
toy	2248	271	S1	ACACGCGTCATTTACC-1	Sample 1_nCoV 1 scRNA-seq [SW103]	GSM4509011	63	PBMC	M	COVID-19 patient	severe COVID-19 patient	0.88968	2353	270	Erythroblast	Erythroblast	severe COVID-19 patient
toy	7184	1668	S1	ACACGCGTCCTGTACC-1	Sample 1_nCoV 1 scRNA-seq [SW103]	GSM4509011	63	PBMC	M	COVID-19 patient	severe COVID-19 patient	9.86915	2593	846	Naive B cells	B cells	severe COVID-19 patient
toy	7941	1862	S1	ACACTGAAGAAGTCAT-1	Sample 1_nCoV 1 scRNA-seq [SW103]	GSM4509011	63	PBMC	M	COVID-19 patient	severe COVID-19 patient	14.104	2487	742	Naive B cells	B cells	severe COVID-19 patient
toy	641	278	S1	ACACTGAAGAGCCGAT-1	Sample 1_nCoV 1 scRNA-seq [SW103]	GSM4509011	63	PBMC	M	COVID-19 patient	severe COVID-19 patient	8.73635	1922	397	Platelets	Platelets	severe COVID-19 patient
toy	8817	1950	S1	ACACTGACAGCACAGA-1	Sample 1_nCoV 1 scRNA-seq [SW103]	GSM4509011	63	PBMC	M	COVID-19 patient	severe COVID-19 patient	6.306	2423	671	Non-switched memory B cells	B cells	severe COVID-19 patient
toy	5731	1928	S1	ACACTGATCTCTCAAT-1	Sample 1_nCoV 1 scRNA-seq [SW103]	GSM4509011	63	PBMC	M	COVID-19 patient	severe COVID-19 patient	6.75275	3047	1620	Classical monocytes	Monocytes	severe COVID-19 patient
toy	4131	1294	S1	ACAGAAAAGAGATTCA-1	Sample 1_nCoV 1 scRNA-seq [SW103]	GSM4509011	63	PBMC	M	COVID-19 patient	severe COVID-19 patient	10.5301	2846	1270	Follicular helper T cells	CD4+ T cells	severe COVID-19 patient
toy	5022	1312	S1	ACAGAAAAGGAAAGTG-1	Sample 1_nCoV 1 scRNA-seq [SW103]	GSM4509011	63	PBMC	M	COVID-19 patient	severe COVID-19 patient	9.17961	2909	1176	Non-switched memory B cells	B cells	severe COVID-19 patient
toy	9694	2732	S1	ACAGAAAAGTCAAGCG-1	Sample 1_nCoV 1 scRNA-seq [SW103]	GSM4509011	63	PBMC	M	COVID-19 patient	severe COVID-19 patient	7.27254	2419	1022	Classical monocytes	Monocytes	severe COVID-19 patient
toy	574	224	S1	ACAGAAACACATAGCT-1	Sample 1_nCoV 1 scRNA-seq [SW103]	GSM4509011	63	PBMC	M	COVID-19 patient	severe COVID-19 patient	8.7108	1905	360	Progenitor cells	NA	severe COVID-19 patient
toy	1972	554	S1	ACAGAAACATGCGGTC-1	Sample 1_nCoV 1 scRNA-seq [SW103]	GSM4509011	63	PBMC	M	COVID-19 patient	severe COVID-19 patient	2.68763	2286	554	Platelets	Platelets	severe COVID-19 patient
toy	9871	2722	S1	ACAGAAAGTTGCATAC-1	Sample 1_nCoV 1 scRNA-seq [SW103]	GSM4509011	63	PBMC	M	COVID-19 patient	severe COVID-19 patient	7.24344	2460	998	Intermediate monocytes	Monocytes	severe COVID-19 patient
toy	5617	1435	S1	ACAGAAATCGCCACTT-1	Sample 1_nCoV 1 scRNA-seq [SW103]	GSM4509011	63	PBMC	M	COVID-19 patient	severe COVID-19 patient	6.58715	2921	1192	Naive B cells	B cells	severe COVID-19 patient
toy	10546	2716	S1	ACAGCCGAGACAGCGT-1	Sample 1_nCoV 1 scRNA-seq [SW103]	GSM4509011	63	PBMC	M	COVID-19 patient	severe COVID-19 patient	10.1081	2515	1051	Classical monocytes	Monocytes	severe COVID-19 patient
toy	12778	3145	S1	ACAGCCGAGTAAACAC-1	Sample 1_nCoV 1 scRNA-seq [SW103]	GSM4509011	63	PBMC	M	COVID-19 patient	severe COVID-19 patient	8.6242	2544	1106	Classical monocytes	Monocytes	severe COVID-19 patient
toy	4619	1431	S1	ACAGCCGCACACGTGC-1	Sample 1_nCoV 1 scRNA-seq [SW103]	GSM4509011	63	PBMC	M	COVID-19 patient	severe COVID-19 patient	3.63715	2949	1375	Naive B cells	B cells	severe COVID-19 patient
toy	522	255	S1	ACAGCCGGTAACACCT-1	Sample 1_nCoV 1 scRNA-seq [SW103]	GSM4509011	63	PBMC	M	COVID-19 patient	severe COVID-19 patient	8.23755	1817	393	Platelets	Platelets	severe COVID-19 patient
toy	9305	2669	S1	ACAGCCGGTTCGTTCC-1	Sample 1_nCoV 1 scRNA-seq [SW103]	GSM4509011	63	PBMC	M	COVID-19 patient	severe COVID-19 patient	10.7684	2432	1024	Classical monocytes	Monocytes	severe COVID-19 patient
toy	5491	1537	S1	ACAGGGAAGAGTTGTA-1	Sample 1_nCoV 1 scRNA-seq [SW103]	GSM4509011	63	PBMC	M	COVID-19 patient	severe COVID-19 patient	6.28301	2957	1318	T regulatory cells	CD8+ T cells	severe COVID-19 patient
toy	1119	533	S1	ACAGGGAAGTATTCCG-1	Sample 1_nCoV 1 scRNA-seq [SW103]	GSM4509011	63	PBMC	M	COVID-19 patient	severe COVID-19 patient	5.80876	2272	549	Non-switched memory B cells	B cells	severe COVID-19 patient
toy	12890	3226	S1	ACAGGGACAAGGACAC-1	Sample 1_nCoV 1 scRNA-seq [SW103]	GSM4509011	63	PBMC	M	COVID-19 patient	severe COVID-19 patient	6.08999	2576	1215	Classical monocytes	Monocytes	severe COVID-19 patient
toy	3719	467	S1	ACAGGGATCCTTACCG-1	Sample 1_nCoV 1 scRNA-seq [SW103]	GSM4509011	63	PBMC	M	COVID-19 patient	severe COVID-19 patient	1.98978	2843	441	Erythroblast	Erythroblast	severe COVID-19 patient
toy	6898	1709	S1	ACAGGGATCGAGGCAA-1	Sample 1_nCoV 1 scRNA-seq [SW103]	GSM4509011	63	PBMC	M	COVID-19 patient	severe COVID-19 patient	4.63903	2678	986	Th2 cells	CD4+ T cells	severe COVID-19 patient
toy	8159	1958	S1	ACATCCCAGAATAGTC-1	Sample 1_nCoV 1 scRNA-seq [SW103]	GSM4509011	63	PBMC	M	COVID-19 patient	severe COVID-19 patient	4.00784	2380	719	T regulatory cells	CD4+ T cells	severe COVID-19 patient
toy	491	272	S1	ACATCCCAGTGCGACA-1	Sample 1_nCoV 1 scRNA-seq [SW103]	GSM4509011	63	PBMC	M	COVID-19 patient	severe COVID-19 patient	6.51731	1819	406	HSC_-G-CSF	HSC_-G-CSF	severe COVID-19 patient
toy	13105	3144	S1	ACATCCCCACGGAAGT-1	Sample 1_nCoV 1 scRNA-seq [SW103]	GSM4509011	63	PBMC	M	COVID-19 patient	severe COVID-19 patient	5.73827	2688	1109	Intermediate monocytes	Monocytes	severe COVID-19 patient
toy	531	241	S1	ACATCCCCACTCTCGT-1	Sample 1_nCoV 1 scRNA-seq [SW103]	GSM4509011	63	PBMC	M	COVID-19 patient	severe COVID-19 patient	12.9944	1863	378	Myeloid dendritic cells	NA	severe COVID-19 patient
toy	6673	1929	S1	ACATCCCGTAATGCTC-1	Sample 1_nCoV 1 scRNA-seq [SW103]	GSM4509011	63	PBMC	M	COVID-19 patient	severe COVID-19 patient	6.32399	2826	1265	Switched memory B cells	B cells	severe COVID-19 patient
toy	6086	1820	S1	ACATCCCGTGGATACG-1	Sample 1_nCoV 1 scRNA-seq [SW103]	GSM4509011	63	PBMC	M	COVID-19 patient	severe COVID-19 patient	8.21558	2909	1360	Non-Vd2 gd T cells	T cells	severe COVID-19 patient
toy	2179	262	S1	ACATCCCTCACTAGCA-1	Sample 1_nCoV 1 scRNA-seq [SW103]	GSM4509011	63	PBMC	M	COVID-19 patient	severe COVID-19 patient	12.9417	2335	262	Erythroblast	Erythroblast	severe COVID-19 patient
toy	2684	901	S1	ACATCCCTCAGAGTTC-1	Sample 1_nCoV 1 scRNA-seq [SW103]	GSM4509011	63	PBMC	M	COVID-19 patient	severe COVID-19 patient	18.8897	2545	899	Follicular helper T cells	CD4+ T cells	severe COVID-19 patient
toy	9819	2137	S1	ACATCGAGTAATGTGA-1	Sample 1_nCoV 1 scRNA-seq [SW103]	GSM4509011	63	PBMC	M	COVID-19 patient	severe COVID-19 patient	11.1111	2360	641	Switched memory B cells	B cells	severe COVID-19 patient
toy	1322	540	S1	ACATCGAGTATGTCAC-1	Sample 1_nCoV 1 scRNA-seq [SW103]	GSM4509011	63	PBMC	M	COVID-19 patient	severe COVID-19 patient	2.72315	2052	592	Platelets	Platelets	severe COVID-19 patient
toy	5167	1179	S1	ACATCGAGTTGCATCA-1	Sample 1_nCoV 1 scRNA-seq [SW103]	GSM4509011	63	PBMC	M	COVID-19 patient	severe COVID-19 patient	3.30946	3036	1065	Platelets	Platelets	severe COVID-19 patient
toy	556	291	S1	ACATGCAAGTCTTCCC-1	Sample 1_nCoV 1 scRNA-seq [SW103]	GSM4509011	63	PBMC	M	COVID-19 patient	severe COVID-19 patient	8.09353	1828	410	HSC_-G-CSF	HSC_-G-CSF	severe COVID-19 patient
toy	10439	2494	S1	ACATGCACAAGTGGGT-1	Sample 1_nCoV 1 scRNA-seq [SW103]	GSM4509011	63	PBMC	M	COVID-19 patient	severe COVID-19 patient	11.1984	2420	792	Non-switched memory B cells	B cells	severe COVID-19 patient
toy	6957	1970	S1	ACATGCACAGTTAGAA-1	Sample 1_nCoV 1 scRNA-seq [SW103]	GSM4509011	63	PBMC	M	COVID-19 patient	severe COVID-19 patient	8.63878	2714	1151	Vd2 gd T cells	T cells	severe COVID-19 patient
toy	3469	242	S1	ACATGCAGTAGCGCCT-1	Sample 1_nCoV 1 scRNA-seq [SW103]	GSM4509011	63	PBMC	M	COVID-19 patient	severe COVID-19 patient	1.15307	2768	221	Erythroblast	Erythroblast	severe COVID-19 patient
toy	5134	1857	S1	ACATGCAGTTCATCTT-1	Sample 1_nCoV 1 scRNA-seq [SW103]	GSM4509011	63	PBMC	M	COVID-19 patient	severe COVID-19 patient	8.08337	3104	1704	Non-Vd2 gd T cells	NK cells	severe COVID-19 patient
toy	5439	1775	S1	ACATGCAGTTCTCACC-1	Sample 1_nCoV 1 scRNA-seq [SW103]	GSM4509011	63	PBMC	M	COVID-19 patient	severe COVID-19 patient	4.94576	3051	1562	Central memory CD8 T cells	CD8+ T cells	severe COVID-19 patient
toy	10627	2786	S1	ACATGCATCGGTTGTA-1	Sample 1_nCoV 1 scRNA-seq [SW103]	GSM4509011	63	PBMC	M	COVID-19 patient	severe COVID-19 patient	8.06436	2487	1063	Classical monocytes	Monocytes	severe COVID-19 patient
toy	1695	673	S1	ACATTTCCACTCACTC-1	Sample 1_nCoV 1 scRNA-seq [SW103]	GSM4509011	63	PBMC	M	COVID-19 patient	severe COVID-19 patient	12.5664	2125	672	Platelets	Platelets	severe COVID-19 patient
toy	6542	1966	S1	ACATTTCGTTTCCCAC-1	Sample 1_nCoV 1 scRNA-seq [SW103]	GSM4509011	63	PBMC	M	COVID-19 patient	severe COVID-19 patient	10.3332	2873	1338	Vd2 gd T cells	T cells	severe COVID-19 patient
toy	10624	2871	S1	ACCAAACAGCACCGTC-1	Sample 1_nCoV 1 scRNA-seq [SW103]	GSM4509011	63	PBMC	M	COVID-19 patient	severe COVID-19 patient	6.4006	2452	1066	Classical monocytes	Monocytes	severe COVID-19 patient
toy	4718	1420	S1	ACCAAACAGCCATCCG-1	Sample 1_nCoV 1 scRNA-seq [SW103]	GSM4509011	63	PBMC	M	COVID-19 patient	severe COVID-19 patient	6.86732	2955	1350	Naive B cells	B cells	severe COVID-19 patient
toy	7134	2098	S1	ACCAAACCATGACTAC-1	Sample 1_nCoV 1 scRNA-seq [SW103]	GSM4509011	63	PBMC	M	COVID-19 patient	severe COVID-19 patient	10.0925	2689	1170	Natural killer cells	NK cells	severe COVID-19 patient
toy	735	316	S1	ACCAAACGTTGCATGT-1	Sample 1_nCoV 1 scRNA-seq [SW103]	GSM4509011	63	PBMC	M	COVID-19 patient	severe COVID-19 patient	17.2789	1934	431	Platelets	Platelets	severe COVID-19 patient
toy	10264	2816	S1	ACCAAACTCACCATGA-1	Sample 1_nCoV 1 scRNA-seq [SW103]	GSM4509011	63	PBMC	M	COVID-19 patient	severe COVID-19 patient	10.5709	2493	1097	Classical monocytes	Monocytes	severe COVID-19 patient
toy	5354	1327	S1	ACCAAACTCGTGTGGC-1	Sample 1_nCoV 1 scRNA-seq [SW103]	GSM4509011	63	PBMC	M	COVID-19 patient	severe COVID-19 patient	7.52708	2909	1165	Naive B cells	B cells	severe COVID-19 patient
toy	3180	444	S1	ACCAACACAGTGTGCC-1	Sample 1_nCoV 1 scRNA-seq [SW103]	GSM4509011	63	PBMC	M	COVID-19 patient	severe COVID-19 patient	15.7233	2672	444	Platelets	Platelets	severe COVID-19 patient
toy	552	225	S1	ACCAACACATAAGATG-1	Sample 1_nCoV 1 scRNA-seq [SW103]	GSM4509011	63	PBMC	M	COVID-19 patient	severe COVID-19 patient	3.62319	1928	335	HSC_-G-CSF	HSC_-G-CSF	severe COVID-19 patient
toy	11022	2659	S1	ACCAACACATTGTCGA-1	Sample 1_nCoV 1 scRNA-seq [SW103]	GSM4509011	63	PBMC	M	COVID-19 patient	severe COVID-19 patient	7.11305	2541	1027	Intermediate monocytes	Monocytes	severe COVID-19 patient
toy	8591	2529	S1	ACCAACAGTACAGTAA-1	Sample 1_nCoV 1 scRNA-seq [SW103]	GSM4509011	63	PBMC	M	COVID-19 patient	severe COVID-19 patient	7.11209	2431	1054	Classical monocytes	Monocytes	severe COVID-19 patient
toy	8718	2236	S1	ACCAACATCCTACCGT-1	Sample 1_nCoV 1 scRNA-seq [SW103]	GSM4509011	63	PBMC	M	COVID-19 patient	severe COVID-19 patient	5.98761	2370	786	Th2 cells	CD4+ T cells	severe COVID-19 patient
toy	4347	1578	S1	ACCAACATCTGACCCT-1	Sample 1_nCoV 1 scRNA-seq [SW103]	GSM4509011	63	PBMC	M	COVID-19 patient	severe COVID-19 patient	9.84587	2956	1542	Natural killer cells	NK cells	severe COVID-19 patient
toy	27216	5114	S1	ACCACAAAGGACTGGT-1	Sample 1_nCoV 1 scRNA-seq [SW103]	GSM4509011	63	PBMC	M	COVID-19 patient	severe COVID-19 patient	6.98486	2382	1072	Intermediate monocytes	NA	severe COVID-19 patient
toy	1414	753	S1	ACCACAACAAGTGCAG-1	Sample 1_nCoV 1 scRNA-seq [SW103]	GSM4509011	63	PBMC	M	COVID-19 patient	severe COVID-19 patient	10.7496	2022	756	Plasmablasts	NA	severe COVID-19 patient
toy	10230	2637	S1	ACCACAACATGTACGT-1	Sample 1_nCoV 1 scRNA-seq [SW103]	GSM4509011	63	PBMC	M	COVID-19 patient	severe COVID-19 patient	6.50049	2449	997	Classical monocytes	Monocytes	severe COVID-19 patient
toy	1708	216	S1	ACCACAATCCGCACGA-1	Sample 1_nCoV 1 scRNA-seq [SW103]	GSM4509011	63	PBMC	M	COVID-19 patient	severe COVID-19 patient	3.16159	2151	217	HSC_-G-CSF	HSC_-G-CSF	severe COVID-19 patient
toy	8884	2591	S1	ACCACAATCTATTTCG-1	Sample 1_nCoV 1 scRNA-seq [SW103]	GSM4509011	63	PBMC	M	COVID-19 patient	severe COVID-19 patient	7.74426	2441	1059	Classical monocytes	Monocytes	severe COVID-19 patient
toy	7595	2277	S1	ACCATTTAGTAATCCC-1	Sample 1_nCoV 1 scRNA-seq [SW103]	GSM4509011	63	PBMC	M	COVID-19 patient	severe COVID-19 patient	11.9421	2451	1010	Classical monocytes	Monocytes	severe COVID-19 patient
toy	318	211	S1	ACCATTTAGTTGCCTA-1	Sample 1_nCoV 1 scRNA-seq [SW103]	GSM4509011	63	PBMC	M	COVID-19 patient	severe COVID-19 patient	3.14465	1708	392	Intermediate monocytes	NA	severe COVID-19 patient
toy	887	347	S1	ACCATTTCACACGGTC-1	Sample 1_nCoV 1 scRNA-seq [SW103]	GSM4509011	63	PBMC	M	COVID-19 patient	severe COVID-19 patient	13.5287	2069	424	Platelets	Platelets	severe COVID-19 patient
toy	2321	1064	S1	ACCATTTCATGCAGGA-1	Sample 1_nCoV 1 scRNA-seq [SW103]	GSM4509011	63	PBMC	M	COVID-19 patient	severe COVID-19 patient	8.31538	2360	1064	Classical monocytes	Monocytes	severe COVID-19 patient
toy	606	266	S1	ACCATTTTCCGTTGAA-1	Sample 1_nCoV 1 scRNA-seq [SW103]	GSM4509011	63	PBMC	M	COVID-19 patient	severe COVID-19 patient	1.9802	1888	390	HSC_-G-CSF	HSC_-G-CSF	severe COVID-19 patient
toy	4258	1644	S1	ACCATTTTCGCTACAA-1	Sample 1_nCoV 1 scRNA-seq [SW103]	GSM4509011	63	PBMC	M	COVID-19 patient	severe COVID-19 patient	5.98873	2942	1618	Natural killer cells	NK cells	severe COVID-19 patient
toy	7135	1732	S1	ACCCAAACAACCGCTG-1	Sample 1_nCoV 1 scRNA-seq [SW103]	GSM4509011	63	PBMC	M	COVID-19 patient	severe COVID-19 patient	7.00771	2612	903	Central memory CD8 T cells	CD8+ T cells	severe COVID-19 patient
toy	4995	1381	S1	ACCCAAACAAGTCGTT-1	Sample 1_nCoV 1 scRNA-seq [SW103]	GSM4509011	63	PBMC	M	COVID-19 patient	severe COVID-19 patient	8.20821	2937	1253	Naive B cells	B cells	severe COVID-19 patient
toy	8484	2480	S1	ACCCAAACATACTGAC-1	Sample 1_nCoV 1 scRNA-seq [SW103]	GSM4509011	63	PBMC	M	COVID-19 patient	severe COVID-19 patient	6.1174	2397	1005	Classical monocytes	Monocytes	severe COVID-19 patient
toy	4906	1488	S1	ACCCAAAGTGCCTAAT-1	Sample 1_nCoV 1 scRNA-seq [SW103]	GSM4509011	63	PBMC	M	COVID-19 patient	severe COVID-19 patient	3.56706	2967	1365	Naive B cells	B cells	severe COVID-19 patient
toy	6260	2058	S1	ACCCAAAGTGTTTACG-1	Sample 1_nCoV 1 scRNA-seq [SW103]	GSM4509011	63	PBMC	M	COVID-19 patient	severe COVID-19 patient	10.5751	2915	1515	Classical monocytes	Monocytes	severe COVID-19 patient
toy	6893	1752	S1	ACCCAAATCGCGATCG-1	Sample 1_nCoV 1 scRNA-seq [SW103]	GSM4509011	63	PBMC	M	COVID-19 patient	severe COVID-19 patient	5.41129	2720	1061	Non-switched memory B cells	B cells	severe COVID-19 patient
toy	4315	1172	S1	ACCCTCAAGCGACTGA-1	Sample 1_nCoV 1 scRNA-seq [SW103]	GSM4509011	63	PBMC	M	COVID-19 patient	severe COVID-19 patient	4.98262	2841	1147	Naive CD4 T cells	CD4+ T cells	severe COVID-19 patient
toy	8720	2293	S1	ACCCTCACAGCTACCG-1	Sample 1_nCoV 1 scRNA-seq [SW103]	GSM4509011	63	PBMC	M	COVID-19 patient	severe COVID-19 patient	3.93349	2412	881	Th2 cells	CD4+ T cells	severe COVID-19 patient
toy	5508	1908	S1	ACCCTCACATCACAGT-1	Sample 1_nCoV 1 scRNA-seq [SW103]	GSM4509011	63	PBMC	M	COVID-19 patient	severe COVID-19 patient	7.98838	3094	1667	Natural killer cells	NK cells	severe COVID-19 patient
toy	14474	3375	S1	ACCCTCATCTCGAGTA-1	Sample 1_nCoV 1 scRNA-seq [SW103]	GSM4509011	63	PBMC	M	COVID-19 patient	severe COVID-19 patient	8.55327	2545	1113	Classical monocytes	Monocytes	severe COVID-19 patient
toy	3167	1066	S1	ACCCTTGAGGTCACAG-1	Sample 1_nCoV 1 scRNA-seq [SW103]	GSM4509011	63	PBMC	M	COVID-19 patient	severe COVID-19 patient	14.6511	2697	1065	Naive B cells	B cells	severe COVID-19 patient
toy	9247	2660	S1	ACCCTTGCATGTTCAG-1	Sample 1_nCoV 1 scRNA-seq [SW103]	GSM4509011	63	PBMC	M	COVID-19 patient	severe COVID-19 patient	9.84103	2420	1019	Classical monocytes	Monocytes	severe COVID-19 patient
toy	6947	1494	S1	ACCCTTGGTTGGATCT-1	Sample 1_nCoV 1 scRNA-seq [SW103]	GSM4509011	63	PBMC	M	COVID-19 patient	severe COVID-19 patient	5.95941	2658	840	Naive B cells	B cells	severe COVID-19 patient
toy	5566	1771	S1	ACCCTTGTCCCAAGTA-1	Sample 1_nCoV 1 scRNA-seq [SW103]	GSM4509011	63	PBMC	M	COVID-19 patient	severe COVID-19 patient	8.33633	3015	1512	Classical monocytes	Monocytes	severe COVID-19 patient
toy	489	245	S1	ACCGTTCAGCACCGTC-1	Sample 1_nCoV 1 scRNA-seq [SW103]	GSM4509011	63	PBMC	M	COVID-19 patient	severe COVID-19 patient	8.17996	1822	388	HSC_-G-CSF	HSC_-G-CSF	severe COVID-19 patient
toy	4386	1455	S1	ACCGTTCCAATCAAGA-1	Sample 1_nCoV 1 scRNA-seq [SW103]	GSM4509011	63	PBMC	M	COVID-19 patient	severe COVID-19 patient	9.55312	2940	1414	Naive B cells	B cells	severe COVID-19 patient
toy	6073	1566	S1	ACCGTTCCACCCAAGC-1	Sample 1_nCoV 1 scRNA-seq [SW103]	GSM4509011	63	PBMC	M	COVID-19 patient	severe COVID-19 patient	6.75119	2884	1179	Non-switched memory B cells	B cells	severe COVID-19 patient
toy	3662	1445	S1	ACCGTTCCATGGAAGC-1	Sample 1_nCoV 1 scRNA-seq [SW103]	GSM4509011	63	PBMC	M	COVID-19 patient	severe COVID-19 patient	12.6161	2839	1435	Classical monocytes	Monocytes	severe COVID-19 patient
toy	659	259	S1	ACCGTTCGTTGTCATG-1	Sample 1_nCoV 1 scRNA-seq [SW103]	GSM4509011	63	PBMC	M	COVID-19 patient	severe COVID-19 patient	7.13202	1917	372	HSC_-G-CSF	HSC_-G-CSF	severe COVID-19 patient
toy	1339	682	S1	ACCGTTCTCGTTGCCT-1	Sample 1_nCoV 1 scRNA-seq [SW103]	GSM4509011	63	PBMC	M	COVID-19 patient	severe COVID-19 patient	11.8745	2089	700	Classical monocytes	Monocytes	severe COVID-19 patient
toy	5842	1601	S1	ACCTACCAGATACGAT-1	Sample 1_nCoV 1 scRNA-seq [SW103]	GSM4509011	63	PBMC	M	COVID-19 patient	severe COVID-19 patient	8.59295	2924	1295	Th17 cells	CD4+ T cells	severe COVID-19 patient
toy	9664	2668	S1	ACCTACCGTATATGGA-1	Sample 1_nCoV 1 scRNA-seq [SW103]	GSM4509011	63	PBMC	M	COVID-19 patient	severe COVID-19 patient	7.91598	2455	1026	Classical monocytes	Monocytes	severe COVID-19 patient
toy	11180	2454	S1	ACCTACCGTCACAGTT-1	Sample 1_nCoV 1 scRNA-seq [SW103]	GSM4509011	63	PBMC	M	COVID-19 patient	severe COVID-19 patient	5.95707	2436	790	Th1 cells	CD4+ T cells	severe COVID-19 patient
toy	7315	2411	S1	ACCTACCTCCATTTCA-1	Sample 1_nCoV 1 scRNA-seq [SW103]	GSM4509011	63	PBMC	M	COVID-19 patient	severe COVID-19 patient	11.7977	2689	1253	Natural killer cells	NK cells	severe COVID-19 patient
toy	4003	1415	S1	ACCTGAAAGTAGTCAA-1	Sample 1_nCoV 1 scRNA-seq [SW103]	GSM4509011	63	PBMC	M	COVID-19 patient	severe COVID-19 patient	8.36872	2816	1405	Classical monocytes	Monocytes	severe COVID-19 patient
toy	1461	711	S1	ACCTGAACATGCCGAC-1	Sample 1_nCoV 1 scRNA-seq [SW103]	GSM4509011	63	PBMC	M	COVID-19 patient	severe COVID-19 patient	14.9213	2083	714	Terminal effector CD4 T cells	NK cells	severe COVID-19 patient
toy	2766	1125	S1	ACCTGAAGTACCAGAG-1	Sample 1_nCoV 1 scRNA-seq [SW103]	GSM4509011	63	PBMC	M	COVID-19 patient	severe COVID-19 patient	10.7737	2606	1125	Classical monocytes	Monocytes	severe COVID-19 patient
toy	10331	2962	S1	ACCTGAATCGCTCCTA-1	Sample 1_nCoV 1 scRNA-seq [SW103]	GSM4509011	63	PBMC	M	COVID-19 patient	severe COVID-19 patient	7.44362	2463	1111	Non classical monocytes	Monocytes	severe COVID-19 patient
toy	2691	1247	S1	ACCTGAATCGGTCTAA-1	Sample 1_nCoV 1 scRNA-seq [SW103]	GSM4509011	63	PBMC	M	COVID-19 patient	severe COVID-19 patient	5.05388	2591	1247	Classical monocytes	Monocytes	severe COVID-19 patient
toy	4315	1536	S1	ACCTGTCCAATAAGGT-1	Sample 1_nCoV 1 scRNA-seq [SW103]	GSM4509011	63	PBMC	M	COVID-19 patient	severe COVID-19 patient	7.41599	2926	1510	Classical monocytes	Monocytes	severe COVID-19 patient
toy	2693	911	S1	ACCTGTCCAGGACGAT-1	Sample 1_nCoV 1 scRNA-seq [SW103]	GSM4509011	63	PBMC	M	COVID-19 patient	severe COVID-19 patient	4.27033	2581	908	Platelets	Platelets	severe COVID-19 patient
toy	1073	449	S1	ACCTGTCGTAGAAACT-1	Sample 1_nCoV 1 scRNA-seq [SW103]	GSM4509011	63	PBMC	M	COVID-19 patient	severe COVID-19 patient	10.438	2144	517	Platelets	Platelets	severe COVID-19 patient
toy	9379	2014	S1	ACCTGTCGTGCGTGCT-1	Sample 1_nCoV 1 scRNA-seq [SW103]	GSM4509011	63	PBMC	M	COVID-19 patient	severe COVID-19 patient	8.47638	2371	632	Exhausted B cells	B cells	severe COVID-19 patient
toy	26502	4906	S1	ACCTGTCGTGGCTAGA-1	Sample 1_nCoV 1 scRNA-seq [SW103]	GSM4509011	63	PBMC	M	COVID-19 patient	severe COVID-19 patient	8.7616	2894	1462	MEP	MEP	severe COVID-19 patient
toy	13676	3395	S1	ACGATCAAGCCTAACT-1	Sample 1_nCoV 1 scRNA-seq [SW103]	GSM4509011	63	PBMC	M	COVID-19 patient	severe COVID-19 patient	9.33753	2555	1191	Classical monocytes	Monocytes	severe COVID-19 patient
toy	5114	1231	S1	ACGATCACAGCTACTA-1	Sample 1_nCoV 1 scRNA-seq [SW103]	GSM4509011	63	PBMC	M	COVID-19 patient	severe COVID-19 patient	4.65389	2872	1100	Naive B cells	B cells	severe COVID-19 patient
toy	9091	2301	S1	ACGATCACAGGTCCGT-1	Sample 1_nCoV 1 scRNA-seq [SW103]	GSM4509011	63	PBMC	M	COVID-19 patient	severe COVID-19 patient	10.4609	2382	813	Follicular helper T cells	CD4+ T cells	severe COVID-19 patient
toy	10851	2840	S1	ACGATCACAGGTGTTT-1	Sample 1_nCoV 1 scRNA-seq [SW103]	GSM4509011	63	PBMC	M	COVID-19 patient	severe COVID-19 patient	5.11474	2542	1111	Classical monocytes	Monocytes	severe COVID-19 patient
toy	657	312	S1	ACGATCACATTAAGCC-1	Sample 1_nCoV 1 scRNA-seq [SW103]	GSM4509011	63	PBMC	M	COVID-19 patient	severe COVID-19 patient	4.56621	1888	430	Platelets	Platelets	severe COVID-19 patient
toy	9340	2485	S1	ACGATCATCAAGCCGC-1	Sample 1_nCoV 1 scRNA-seq [SW103]	GSM4509011	63	PBMC	M	COVID-19 patient	severe COVID-19 patient	19.5396	2406	928	Classical monocytes	Monocytes	severe COVID-19 patient
toy	6032	2038	S1	ACGATCATCGCCTTTG-1	Sample 1_nCoV 1 scRNA-seq [SW103]	GSM4509011	63	PBMC	M	COVID-19 patient	severe COVID-19 patient	6.08422	3006	1599	Classical monocytes	Monocytes	severe COVID-19 patient
toy	6509	1640	S1	ACGATGTAGGGTCTTT-1	Sample 1_nCoV 1 scRNA-seq [SW103]	GSM4509011	63	PBMC	M	COVID-19 patient	severe COVID-19 patient	4.24028	2787	1098	Naive CD4 T cells	CD4+ T cells	severe COVID-19 patient
toy	24439	4738	S1	ACGATGTAGTTCATGC-1	Sample 1_nCoV 1 scRNA-seq [SW103]	GSM4509011	63	PBMC	M	COVID-19 patient	severe COVID-19 patient	5.94132	2471	1168	Classical monocytes	Monocytes	severe COVID-19 patient
toy	10648	2850	S1	ACGATGTGTTCTCCAC-1	Sample 1_nCoV 1 scRNA-seq [SW103]	GSM4509011	63	PBMC	M	COVID-19 patient	severe COVID-19 patient	7.71037	2481	1078	Classical monocytes	Monocytes	severe COVID-19 patient
toy	6600	2064	S1	ACGCACGAGTGATTCC-1	Sample 1_nCoV 1 scRNA-seq [SW103]	GSM4509011	63	PBMC	M	COVID-19 patient	severe COVID-19 patient	10.0758	2803	1353	Classical monocytes	Monocytes	severe COVID-19 patient
toy	1984	552	S1	ACGCACGCAAAGCTAA-1	Sample 1_nCoV 1 scRNA-seq [SW103]	GSM4509011	63	PBMC	M	COVID-19 patient	severe COVID-19 patient	14.4657	2274	552	Platelets	Platelets	severe COVID-19 patient
toy	1428	438	S1	ACGCACGTCACATTGG-1	Sample 1_nCoV 1 scRNA-seq [SW103]	GSM4509011	63	PBMC	M	COVID-19 patient	severe COVID-19 patient	9.2437	2167	460	Platelets	Platelets	severe COVID-19 patient
toy	3771	213	S1	ACGGAAGAGAGAACCC-1	Sample 1_nCoV 1 scRNA-seq [SW103]	GSM4509011	63	PBMC	M	COVID-19 patient	severe COVID-19 patient	1.03421	2826	188	Plasmablasts	NA	severe COVID-19 patient
toy	2994	1190	S1	ACGGAAGAGCCAAGCA-1	Sample 1_nCoV 1 scRNA-seq [SW103]	GSM4509011	63	PBMC	M	COVID-19 patient	severe COVID-19 patient	3.13961	2685	1190	Classical monocytes	Monocytes	severe COVID-19 patient
toy	864	373	S1	ACGGAAGGTGTGTTTG-1	Sample 1_nCoV 1 scRNA-seq [SW103]	GSM4509011	63	PBMC	M	COVID-19 patient	severe COVID-19 patient	4.16667	2024	451	HSC_-G-CSF	HSC_-G-CSF	severe COVID-19 patient
toy	6809	1508	S1	ACGGAAGGTTCTATCT-1	Sample 1_nCoV 1 scRNA-seq [SW103]	GSM4509011	63	PBMC	M	COVID-19 patient	severe COVID-19 patient	5.4193	2685	896	Naive B cells	B cells	severe COVID-19 patient
toy	1871	508	S1	ACGGAAGTCATTACTC-1	Sample 1_nCoV 1 scRNA-seq [SW103]	GSM4509011	63	PBMC	M	COVID-19 patient	severe COVID-19 patient	9.83431	2268	507	Platelets	Platelets	severe COVID-19 patient
toy	540	204	S1	ACGGAAGTCCTTATCA-1	Sample 1_nCoV 1 scRNA-seq [SW103]	GSM4509011	63	PBMC	M	COVID-19 patient	severe COVID-19 patient	7.96296	1913	343	Progenitor cells	NA	severe COVID-19 patient
toy	15874	3489	S1	ACGGGTCAGCGCACAA-1	Sample 1_nCoV 1 scRNA-seq [SW103]	GSM4509011	63	PBMC	M	COVID-19 patient	severe COVID-19 patient	5.23498	2589	1169	Classical monocytes	Monocytes	severe COVID-19 patient
toy	10284	2868	S1	ACGGGTCAGTGGAATT-1	Sample 1_nCoV 1 scRNA-seq [SW103]	GSM4509011	63	PBMC	M	COVID-19 patient	severe COVID-19 patient	5.4259	2467	1086	Classical monocytes	Monocytes	severe COVID-19 patient
toy	9649	2072	S1	ACGGGTCCAAGAAATC-1	Sample 1_nCoV 1 scRNA-seq [SW103]	GSM4509011	63	PBMC	M	COVID-19 patient	severe COVID-19 patient	5.85553	2376	673	Vd2 gd T cells	T cells	severe COVID-19 patient
toy	7130	1715	S1	ACGGGTCGTAGCGAGT-1	Sample 1_nCoV 1 scRNA-seq [SW103]	GSM4509011	63	PBMC	M	COVID-19 patient	severe COVID-19 patient	5.63815	2611	919	Central memory CD8 T cells	CD8+ T cells	severe COVID-19 patient
toy	11460	2688	S1	ACGGGTCGTGTCCACG-1	Sample 1_nCoV 1 scRNA-seq [SW103]	GSM4509011	63	PBMC	M	COVID-19 patient	severe COVID-19 patient	8.95288	2458	893	Switched memory B cells	B cells	severe COVID-19 patient
toy	7955	1739	S1	ACGGGTCGTTCTATCT-1	Sample 1_nCoV 1 scRNA-seq [SW103]	GSM4509011	63	PBMC	M	COVID-19 patient	severe COVID-19 patient	6.17222	2533	655	Non-switched memory B cells	B cells	severe COVID-19 patient
toy	6886	1992	S1	ACGGGTCGTTTACCAG-1	Sample 1_nCoV 1 scRNA-seq [SW103]	GSM4509011	63	PBMC	M	COVID-19 patient	severe COVID-19 patient	15.1322	2716	1209	Classical monocytes	Monocytes	severe COVID-19 patient
toy	5229	1359	S1	ACGGTCGGTCAGGTGA-1	Sample 1_nCoV 1 scRNA-seq [SW103]	GSM4509011	63	PBMC	M	COVID-19 patient	severe COVID-19 patient	8.0895	2908	1206	Naive B cells	B cells	severe COVID-19 patient
toy	6609	1405	S1	ACGGTCGGTCCAAGAG-1	Sample 1_nCoV 1 scRNA-seq [SW103]	GSM4509011	63	PBMC	M	COVID-19 patient	severe COVID-19 patient	15.842	2692	857	Non-switched memory B cells	B cells	severe COVID-19 patient
toy	502	259	S1	ACGGTTAGTAACCCGC-1	Sample 1_nCoV 1 scRNA-seq [SW103]	GSM4509011	63	PBMC	M	COVID-19 patient	severe COVID-19 patient	10.9562	1833	392	HSC_-G-CSF	HSC_-G-CSF	severe COVID-19 patient
toy	7374	1913	S1	ACGGTTAGTAGTGATA-1	Sample 1_nCoV 1 scRNA-seq [SW103]	GSM4509011	63	PBMC	M	COVID-19 patient	severe COVID-19 patient	6.63141	2490	856	Non-switched memory B cells	B cells	severe COVID-19 patient
toy	3553	1424	S1	ACGGTTAGTTAACAGA-1	Sample 1_nCoV 1 scRNA-seq [SW103]	GSM4509011	63	PBMC	M	COVID-19 patient	severe COVID-19 patient	8.49986	2847	1419	Classical monocytes	Monocytes	severe COVID-19 patient
toy	29705	3920	S1	ACGGTTATCTTTGATC-1	Sample 1_nCoV 1 scRNA-seq [SW103]	GSM4509011	63	PBMC	M	COVID-19 patient	severe COVID-19 patient	14.8897	2930	1109	Erythroblast	Erythroblast	severe COVID-19 patient
toy	8301	2402	S1	ACGTAACAGCATCGAG-1	Sample 1_nCoV 1 scRNA-seq [SW103]	GSM4509011	63	PBMC	M	COVID-19 patient	severe COVID-19 patient	9.28804	2409	993	Classical monocytes	Monocytes	severe COVID-19 patient
toy	2226	940	S1	ACGTAACAGTCGGCCT-1	Sample 1_nCoV 1 scRNA-seq [SW103]	GSM4509011	63	PBMC	M	COVID-19 patient	severe COVID-19 patient	6.42408	2329	940	Classical monocytes	Monocytes	severe COVID-19 patient
toy	18504	4095	S1	ACGTAACGTAATGATG-1	Sample 1_nCoV 1 scRNA-seq [SW103]	GSM4509011	63	PBMC	M	COVID-19 patient	severe COVID-19 patient	5.49611	2466	1104	Classical monocytes	Monocytes	severe COVID-19 patient
toy	1917	956	S1	ACGTAACGTGACACGA-1	Sample 1_nCoV 1 scRNA-seq [SW103]	GSM4509011	63	PBMC	M	COVID-19 patient	severe COVID-19 patient	11.2154	2189	955	Classical monocytes	Monocytes	severe COVID-19 patient
toy	5192	1857	S1	ACGTACACATAACCCA-1	Sample 1_nCoV 1 scRNA-seq [SW103]	GSM4509011	63	PBMC	M	COVID-19 patient	severe COVID-19 patient	8.82126	3094	1691	Natural killer cells	NK cells	severe COVID-19 patient
toy	8326	2545	S1	ACGTACACATTGACCA-1	Sample 1_nCoV 1 scRNA-seq [SW103]	GSM4509011	63	PBMC	M	COVID-19 patient	severe COVID-19 patient	5.29666	2409	1044	Classical monocytes	Monocytes	severe COVID-19 patient
toy	8231	2318	S1	ACGTACATCCATACTT-1	Sample 1_nCoV 1 scRNA-seq [SW103]	GSM4509011	63	PBMC	M	COVID-19 patient	severe COVID-19 patient	8.92966	2432	964	Classical monocytes	Monocytes	severe COVID-19 patient
toy	1755	662	S1	ACGTAGTAGTCAGAGC-1	Sample 1_nCoV 1 scRNA-seq [SW103]	GSM4509011	63	PBMC	M	COVID-19 patient	severe COVID-19 patient	16.9231	2193	661	Naive B cells	B cells	severe COVID-19 patient
toy	5118	1761	S1	ACGTAGTCATACATCG-1	Sample 1_nCoV 1 scRNA-seq [SW103]	GSM4509011	63	PBMC	M	COVID-19 patient	severe COVID-19 patient	7.67878	3069	1608	Non-Vd2 gd T cells	T cells	severe COVID-19 patient
toy	4253	1312	S1	ACGTAGTGTCTGCATA-1	Sample 1_nCoV 1 scRNA-seq [SW103]	GSM4509011	63	PBMC	M	COVID-19 patient	severe COVID-19 patient	10.4867	2872	1286	Vd2 gd T cells	T cells	severe COVID-19 patient
toy	4942	1689	S1	ACGTAGTTCGTCGCTT-1	Sample 1_nCoV 1 scRNA-seq [SW103]	GSM4509011	63	PBMC	M	COVID-19 patient	severe COVID-19 patient	12.4444	3020	1572	Terminal effector CD8 T cells	T cells	severe COVID-19 patient
toy	10733	3006	S1	ACGTCCTAGCGTGCCT-1	Sample 1_nCoV 1 scRNA-seq [SW103]	GSM4509011	63	PBMC	M	COVID-19 patient	severe COVID-19 patient	5.31072	2475	1145	Classical monocytes	Monocytes	severe COVID-19 patient
toy	15798	3124	S1	ACGTCCTGTTTAGTCG-1	Sample 1_nCoV 1 scRNA-seq [SW103]	GSM4509011	63	PBMC	M	COVID-19 patient	severe COVID-19 patient	9.83036	2459	843	Th1 cells	CD4+ T cells	severe COVID-19 patient
toy	10358	2935	S1	ACGTCCTTCGCACGGT-1	Sample 1_nCoV 1 scRNA-seq [SW103]	GSM4509011	63	PBMC	M	COVID-19 patient	severe COVID-19 patient	7.10562	2484	1137	Classical monocytes	Monocytes	severe COVID-19 patient
toy	706	262	S1	ACGTTCCCAAGACGGT-1	Sample 1_nCoV 1 scRNA-seq [SW103]	GSM4509011	63	PBMC	M	COVID-19 patient	severe COVID-19 patient	7.2238	2009	352	HSC_-G-CSF	HSC_-G-CSF	severe COVID-19 patient
toy	820	252	S1	ACGTTCCCAAGAGATT-1	Sample 1_nCoV 1 scRNA-seq [SW103]	GSM4509011	63	PBMC	M	COVID-19 patient	severe COVID-19 patient	5.73171	2073	330	HSC_-G-CSF	HSC_-G-CSF	severe COVID-19 patient
toy	540	233	S1	ACGTTCCCAAGCGATG-1	Sample 1_nCoV 1 scRNA-seq [SW103]	GSM4509011	63	PBMC	M	COVID-19 patient	severe COVID-19 patient	17.963	1887	379	HSC_-G-CSF	HSC_-G-CSF	severe COVID-19 patient
toy	4446	1449	S1	ACGTTCCGTGCTATTG-1	Sample 1_nCoV 1 scRNA-seq [SW103]	GSM4509011	63	PBMC	M	COVID-19 patient	severe COVID-19 patient	6.32029	2945	1410	Naive B cells	B cells	severe COVID-19 patient
toy	5993	1826	S1	ACGTTCCTCCTAAACG-1	Sample 1_nCoV 1 scRNA-seq [SW103]	GSM4509011	63	PBMC	M	COVID-19 patient	severe COVID-19 patient	7.27515	2926	1399	Terminal effector CD8 T cells	T cells	severe COVID-19 patient
toy	458	222	S1	ACGTTCCTCTCCCAAC-1	Sample 1_nCoV 1 scRNA-seq [SW103]	GSM4509011	63	PBMC	M	COVID-19 patient	severe COVID-19 patient	3.93013	1843	371	Progenitor cells	NA	severe COVID-19 patient
toy	1781	709	S1	ACTACGACAATTGGTC-1	Sample 1_nCoV 1 scRNA-seq [SW103]	GSM4509011	63	PBMC	M	COVID-19 patient	severe COVID-19 patient	6.06401	2196	708	Naive B cells	B cells	severe COVID-19 patient
toy	16363	3564	S1	ACTACGAGTTCGGTCG-1	Sample 1_nCoV 1 scRNA-seq [SW103]	GSM4509011	63	PBMC	M	COVID-19 patient	severe COVID-19 patient	6.6247	2617	1190	Central memory CD8 T cells	CD8+ T cells	severe COVID-19 patient
toy	4245	1589	S1	ACTACGATCCGAAATC-1	Sample 1_nCoV 1 scRNA-seq [SW103]	GSM4509011	63	PBMC	M	COVID-19 patient	severe COVID-19 patient	10.1296	2911	1552	Classical monocytes	Monocytes	severe COVID-19 patient
toy	9521	2190	S1	ACTATCTCAATGCTCA-1	Sample 1_nCoV 1 scRNA-seq [SW103]	GSM4509011	63	PBMC	M	COVID-19 patient	severe COVID-19 patient	3.41351	2358	712	Th17 cells	CD4+ T cells	severe COVID-19 patient
toy	4441	1615	S1	ACTATCTTCACCCTTG-1	Sample 1_nCoV 1 scRNA-seq [SW103]	GSM4509011	63	PBMC	M	COVID-19 patient	severe COVID-19 patient	5.89957	2977	1572	Natural killer cells	NK cells	severe COVID-19 patient
toy	11770	2764	S1	ACTATCTTCCACGAAT-1	Sample 1_nCoV 1 scRNA-seq [SW103]	GSM4509011	63	PBMC	M	COVID-19 patient	severe COVID-19 patient	7.03483	2525	1047	Classical monocytes	Monocytes	severe COVID-19 patient
toy	6760	2093	S1	ACTATCTTCGCTCCTA-1	Sample 1_nCoV 1 scRNA-seq [SW103]	GSM4509011	63	PBMC	M	COVID-19 patient	severe COVID-19 patient	7.7071	2799	1365	Classical monocytes	Monocytes	severe COVID-19 patient
toy	7813	2442	S1	ACTATGGAGACTTCGT-1	Sample 1_nCoV 1 scRNA-seq [SW103]	GSM4509011	63	PBMC	M	COVID-19 patient	severe COVID-19 patient	6.74517	2452	1068	Effector memory CD8 T cells	T cells	severe COVID-19 patient
toy	5496	1922	S1	ACTATGGGTAAGGAGA-1	Sample 1_nCoV 1 scRNA-seq [SW103]	GSM4509011	63	PBMC	M	COVID-19 patient	severe COVID-19 patient	5.96798	3075	1695	Classical monocytes	Monocytes	severe COVID-19 patient
toy	2921	1081	S1	ACTATTCAGCTGTACT-1	Sample 1_nCoV 1 scRNA-seq [SW103]	GSM4509011	63	PBMC	M	COVID-19 patient	severe COVID-19 patient	1.91715	2643	1079	Th1 cells	CD4+ T cells	severe COVID-19 patient
toy	708	326	S1	ACTATTCAGGACAGTC-1	Sample 1_nCoV 1 scRNA-seq [SW103]	GSM4509011	63	PBMC	M	COVID-19 patient	severe COVID-19 patient	1.69492	1919	413	Progenitor cells	Dendritic cells	severe COVID-19 patient
toy	13663	2010	S1	ACTATTCCACAAAGCG-1	Sample 1_nCoV 1 scRNA-seq [SW103]	GSM4509011	63	PBMC	M	COVID-19 patient	severe COVID-19 patient	8.87799	2797	477	Plasmablasts	B cells	severe COVID-19 patient
toy	8884	2720	S1	ACTATTCCATGGCTAT-1	Sample 1_nCoV 1 scRNA-seq [SW103]	GSM4509011	63	PBMC	M	COVID-19 patient	severe COVID-19 patient	9.18505	2415	1086	Classical monocytes	Monocytes	severe COVID-19 patient
toy	9258	2602	S1	ACTATTCGTGCATCTA-1	Sample 1_nCoV 1 scRNA-seq [SW103]	GSM4509011	63	PBMC	M	COVID-19 patient	severe COVID-19 patient	8.73839	2427	1019	Classical monocytes	Monocytes	severe COVID-19 patient
toy	6472	1936	S1	ACTATTCGTTCCGCAG-1	Sample 1_nCoV 1 scRNA-seq [SW103]	GSM4509011	63	PBMC	M	COVID-19 patient	severe COVID-19 patient	7.78739	2878	1353	Vd2 gd T cells	T cells	severe COVID-19 patient
toy	8095	2489	S1	ACTATTCTCAGACCTA-1	Sample 1_nCoV 1 scRNA-seq [SW103]	GSM4509011	63	PBMC	M	COVID-19 patient	severe COVID-19 patient	7.72082	2388	1028	Classical monocytes	Monocytes	severe COVID-19 patient
toy	2732	942	S1	ACTATTCTCGGTCGGT-1	Sample 1_nCoV 1 scRNA-seq [SW103]	GSM4509011	63	PBMC	M	COVID-19 patient	severe COVID-19 patient	11.2738	2568	942	Naive B cells	B cells	severe COVID-19 patient
toy	7616	2031	S1	ACTCCCAAGATGCGAC-1	Sample 1_nCoV 1 scRNA-seq [SW103]	GSM4509011	63	PBMC	M	COVID-19 patient	severe COVID-19 patient	7.89128	2470	888	Exhausted B cells	B cells	severe COVID-19 patient
toy	5130	1764	S1	ACTCCCAAGGGAGGCA-1	Sample 1_nCoV 1 scRNA-seq [SW103]	GSM4509011	63	PBMC	M	COVID-19 patient	severe COVID-19 patient	5.69201	3046	1621	Classical monocytes	Monocytes	severe COVID-19 patient
toy	2348	237	S1	ACTCCCAAGTGCTCGC-1	Sample 1_nCoV 1 scRNA-seq [SW103]	GSM4509011	63	PBMC	M	COVID-19 patient	severe COVID-19 patient	0.425894	2401	237	Naive B cells	Neutrophils	severe COVID-19 patient
toy	2473	1088	S1	ACTCCCACACAGAGCA-1	Sample 1_nCoV 1 scRNA-seq [SW103]	GSM4509011	63	PBMC	M	COVID-19 patient	severe COVID-19 patient	8.16822	2472	1087	Classical monocytes	Monocytes	severe COVID-19 patient
toy	14568	3111	S1	ACTCCCACACAGCCTG-1	Sample 1_nCoV 1 scRNA-seq [SW103]	GSM4509011	63	PBMC	M	COVID-19 patient	severe COVID-19 patient	5.62878	2476	869	Vd2 gd T cells	T cells	severe COVID-19 patient
toy	6944	1853	S1	ACTCCCAGTAGGGTAC-1	Sample 1_nCoV 1 scRNA-seq [SW103]	GSM4509011	63	PBMC	M	COVID-19 patient	severe COVID-19 patient	8.58295	2694	1074	Non-Vd2 gd T cells	T cells	severe COVID-19 patient
toy	11920	3153	S1	ACTCCCAGTCGAGCAA-1	Sample 1_nCoV 1 scRNA-seq [SW103]	GSM4509011	63	PBMC	M	COVID-19 patient	severe COVID-19 patient	6.10738	2608	1226	Classical monocytes	Monocytes	severe COVID-19 patient
toy	381	264	S1	ACTCCCAGTTTCACTT-1	Sample 1_nCoV 1 scRNA-seq [SW103]	GSM4509011	63	PBMC	M	COVID-19 patient	severe COVID-19 patient	11.811	1756	416	NA	NA	severe COVID-19 patient
toy	2797	1125	S1	ACTCCCATCTCGTGGG-1	Sample 1_nCoV 1 scRNA-seq [SW103]	GSM4509011	63	PBMC	M	COVID-19 patient	severe COVID-19 patient	15.6596	2621	1124	Classical monocytes	Monocytes	severe COVID-19 patient
toy	455	238	S1	ACTCCCATCTGGCTGG-1	Sample 1_nCoV 1 scRNA-seq [SW103]	GSM4509011	63	PBMC	M	COVID-19 patient	severe COVID-19 patient	10.7692	1842	380	Progenitor cells	NA	severe COVID-19 patient
toy	8880	2378	S1	ACTCTCGAGAAACTCA-1	Sample 1_nCoV 1 scRNA-seq [SW103]	GSM4509011	63	PBMC	M	COVID-19 patient	severe COVID-19 patient	9.11036	2374	836	Switched memory B cells	B cells	severe COVID-19 patient
toy	7187	2335	S1	ACTCTCGAGAATCGCG-1	Sample 1_nCoV 1 scRNA-seq [SW103]	GSM4509011	63	PBMC	M	COVID-19 patient	severe COVID-19 patient	7.1518	2600	1241	Classical monocytes	Monocytes	severe COVID-19 patient
toy	1308	367	S1	ACTCTCGAGAGTGACC-1	Sample 1_nCoV 1 scRNA-seq [SW103]	GSM4509011	63	PBMC	M	COVID-19 patient	severe COVID-19 patient	4.43425	2165	414	Platelets	Platelets	severe COVID-19 patient
toy	11812	2917	S1	ACTCTCGCAGGTACGA-1	Sample 1_nCoV 1 scRNA-seq [SW103]	GSM4509011	63	PBMC	M	COVID-19 patient	severe COVID-19 patient	9.43109	2537	1052	Intermediate monocytes	Monocytes	severe COVID-19 patient
toy	1810	636	S1	ACTCTCGTCAAGCCTA-1	Sample 1_nCoV 1 scRNA-seq [SW103]	GSM4509011	63	PBMC	M	COVID-19 patient	severe COVID-19 patient	5.52486	2184	636	Platelets	Platelets	severe COVID-19 patient
toy	11729	2804	S1	ACTCTCGTCCATTCAT-1	Sample 1_nCoV 1 scRNA-seq [SW103]	GSM4509011	63	PBMC	M	COVID-19 patient	severe COVID-19 patient	8.55998	2461	896	Naive B cells	B cells	severe COVID-19 patient
toy	4397	1786	S1	ACTGATGAGGACACTG-1	Sample 1_nCoV 1 scRNA-seq [SW103]	GSM4509011	63	PBMC	M	COVID-19 patient	severe COVID-19 patient	8.5058	3014	1749	Terminal effector CD4 T cells	CD8+ T cells	severe COVID-19 patient
toy	595	328	S1	ACTGATGCAAAGCTCT-1	Sample 1_nCoV 1 scRNA-seq [SW103]	GSM4509011	63	PBMC	M	COVID-19 patient	severe COVID-19 patient	6.05042	1806	454	Platelets	Platelets	severe COVID-19 patient
toy	12181	3116	S1	ACTGATGTCGGAAACG-1	Sample 1_nCoV 1 scRNA-seq [SW103]	GSM4509011	63	PBMC	M	COVID-19 patient	severe COVID-19 patient	8.45579	2576	1186	Classical monocytes	Monocytes	severe COVID-19 patient
toy	6039	1934	S1	ACTGATGTCTGGCTGG-1	Sample 1_nCoV 1 scRNA-seq [SW103]	GSM4509011	63	PBMC	M	COVID-19 patient	severe COVID-19 patient	9.32274	2996	1511	Vd2 gd T cells	T cells	severe COVID-19 patient
toy	7340	1766	S1	ACTGCAAAGTGTTGTC-1	Sample 1_nCoV 1 scRNA-seq [SW103]	GSM4509011	63	PBMC	M	COVID-19 patient	severe COVID-19 patient	4.44142	2482	794	Follicular helper T cells	CD8+ T cells	severe COVID-19 patient
toy	1235	468	S1	ACTGCAACACTAGGTT-1	Sample 1_nCoV 1 scRNA-seq [SW103]	GSM4509011	63	PBMC	M	COVID-19 patient	severe COVID-19 patient	2.42915	2105	516	Platelets	Platelets	severe COVID-19 patient
toy	509	219	S1	ACTGCAACATTCTGTT-1	Sample 1_nCoV 1 scRNA-seq [SW103]	GSM4509011	63	PBMC	M	COVID-19 patient	severe COVID-19 patient	4.91159	1876	341	HSC_-G-CSF	HSC_-G-CSF	severe COVID-19 patient
toy	13087	2648	S1	ACTGCAATCGCTGTTC-1	Sample 1_nCoV 1 scRNA-seq [SW103]	GSM4509011	63	PBMC	M	COVID-19 patient	severe COVID-19 patient	13.693	2471	784	Non-switched memory B cells	B cells	severe COVID-19 patient
toy	3200	1215	S1	ACTGCAATCTAGTGAC-1	Sample 1_nCoV 1 scRNA-seq [SW103]	GSM4509011	63	PBMC	M	COVID-19 patient	severe COVID-19 patient	11.4062	2728	1215	Classical monocytes	Monocytes	severe COVID-19 patient
toy	637	358	S1	ACTGCAATCTGTCTCG-1	Sample 1_nCoV 1 scRNA-seq [SW103]	GSM4509011	63	PBMC	M	COVID-19 patient	severe COVID-19 patient	4.23862	1788	479	Platelets	Platelets	severe COVID-19 patient
toy	13224	3364	S1	ACTGTCCAGCAGGTCA-1	Sample 1_nCoV 1 scRNA-seq [SW103]	GSM4509011	63	PBMC	M	COVID-19 patient	severe COVID-19 patient	5.55808	2603	1234	Classical monocytes	Monocytes	severe COVID-19 patient
toy	7662	2071	S1	ACTGTCCCACAGCCAC-1	Sample 1_nCoV 1 scRNA-seq [SW103]	GSM4509011	63	PBMC	M	COVID-19 patient	severe COVID-19 patient	11.7463	2446	853	Non-switched memory B cells	B cells	severe COVID-19 patient
toy	45540	4666	S1	ACTGTCCCAGATTTCG-1	Sample 1_nCoV 1 scRNA-seq [SW103]	GSM4509011	63	PBMC	M	COVID-19 patient	severe COVID-19 patient	7.10804	2875	505	Plasmablasts	B cells	severe COVID-19 patient
toy	6032	1575	S1	ACTGTCCCATCTAACG-1	Sample 1_nCoV 1 scRNA-seq [SW103]	GSM4509011	63	PBMC	M	COVID-19 patient	severe COVID-19 patient	5.52056	2889	1211	Naive B cells	B cells	severe COVID-19 patient
toy	2454	1122	S1	ACTGTCCGTATCTCTT-1	Sample 1_nCoV 1 scRNA-seq [SW103]	GSM4509011	63	PBMC	M	COVID-19 patient	severe COVID-19 patient	10.8802	2454	1122	Naive B cells	B cells	severe COVID-19 patient
toy	8687	2626	S1	ACTGTCCTCAGGTGTT-1	Sample 1_nCoV 1 scRNA-seq [SW103]	GSM4509011	63	PBMC	M	COVID-19 patient	severe COVID-19 patient	5.88235	2418	1070	Classical monocytes	Monocytes	severe COVID-19 patient
toy	9331	2743	S1	ACTGTCCTCCTTCGAC-1	Sample 1_nCoV 1 scRNA-seq [SW103]	GSM4509011	63	PBMC	M	COVID-19 patient	severe COVID-19 patient	6.68739	2438	1085	Classical monocytes	Monocytes	severe COVID-19 patient
toy	5562	1323	S1	ACTGTCCTCGACCTAA-1	Sample 1_nCoV 1 scRNA-seq [SW103]	GSM4509011	63	PBMC	M	COVID-19 patient	severe COVID-19 patient	10.9493	2883	1099	Naive CD4 T cells	CD4+ T cells	severe COVID-19 patient
toy	3162	634	S1	ACTGTCCTCTATCGCC-1	Sample 1_nCoV 1 scRNA-seq [SW103]	GSM4509011	63	PBMC	M	COVID-19 patient	severe COVID-19 patient	8.91841	2641	631	Platelets	Platelets	severe COVID-19 patient
toy	5052	1781	S1	ACTGTGACAGACTCTA-1	Sample 1_nCoV 1 scRNA-seq [SW103]	GSM4509011	63	PBMC	M	COVID-19 patient	severe COVID-19 patient	7.46239	3086	1642	Natural killer cells	NK cells	severe COVID-19 patient
toy	1446	510	S1	ACTGTGACATATTCGG-1	Sample 1_nCoV 1 scRNA-seq [SW103]	GSM4509011	63	PBMC	M	COVID-19 patient	severe COVID-19 patient	5.80913	2104	541	Platelets	Platelets	severe COVID-19 patient
toy	2872	964	S1	ACTGTGACATGAAGCG-1	Sample 1_nCoV 1 scRNA-seq [SW103]	GSM4509011	63	PBMC	M	COVID-19 patient	severe COVID-19 patient	18.9415	2608	963	Naive CD4 T cells	CD4+ T cells	severe COVID-19 patient
toy	12285	3214	S1	ACTGTGAGTTAGGAGC-1	Sample 1_nCoV 1 scRNA-seq [SW103]	GSM4509011	63	PBMC	M	COVID-19 patient	severe COVID-19 patient	7.18763	2588	1231	Classical monocytes	Monocytes	severe COVID-19 patient
toy	493	230	S1	ACTTAGGCACATACTG-1	Sample 1_nCoV 1 scRNA-seq [SW103]	GSM4509011	63	PBMC	M	COVID-19 patient	severe COVID-19 patient	4.46247	1897	367	HSC_-G-CSF	HSC_-G-CSF	severe COVID-19 patient
toy	10450	2916	S1	ACTTAGGCACTGTTCC-1	Sample 1_nCoV 1 scRNA-seq [SW103]	GSM4509011	63	PBMC	M	COVID-19 patient	severe COVID-19 patient	8.03828	2479	1104	Classical monocytes	Monocytes	severe COVID-19 patient
toy	2435	1129	S1	ACTTAGGGTCGATGCC-1	Sample 1_nCoV 1 scRNA-seq [SW103]	GSM4509011	63	PBMC	M	COVID-19 patient	severe COVID-19 patient	8.45996	2435	1129	Classical monocytes	Monocytes	severe COVID-19 patient
toy	5241	1668	S1	ACTTAGGGTGAGACCA-1	Sample 1_nCoV 1 scRNA-seq [SW103]	GSM4509011	63	PBMC	M	COVID-19 patient	severe COVID-19 patient	7.19328	2988	1484	Terminal effector CD8 T cells	T cells	severe COVID-19 patient
toy	558	327	S1	ACTTAGGTCCAGCTCT-1	Sample 1_nCoV 1 scRNA-seq [SW103]	GSM4509011	63	PBMC	M	COVID-19 patient	severe COVID-19 patient	2.15054	1878	423	NA	NA	severe COVID-19 patient
toy	3222	1322	S1	ACTTAGGTCGCAATTG-1	Sample 1_nCoV 1 scRNA-seq [SW103]	GSM4509011	63	PBMC	M	COVID-19 patient	severe COVID-19 patient	17.3805	2782	1321	Natural killer cells	NK cells	severe COVID-19 patient
toy	6904	1714	S1	ACTTATCAGAGGTATT-1	Sample 1_nCoV 1 scRNA-seq [SW103]	GSM4509011	63	PBMC	M	COVID-19 patient	severe COVID-19 patient	8.18366	2658	973	Naive CD8 T cells	CD4+ T cells	severe COVID-19 patient
toy	12175	3178	S1	ACTTATCAGATGCTAA-1	Sample 1_nCoV 1 scRNA-seq [SW103]	GSM4509011	63	PBMC	M	COVID-19 patient	severe COVID-19 patient	6.73511	2535	1177	Classical monocytes	Monocytes	severe COVID-19 patient
toy	5925	1600	S1	ACTTATCCATATTCGG-1	Sample 1_nCoV 1 scRNA-seq [SW103]	GSM4509011	63	PBMC	M	COVID-19 patient	severe COVID-19 patient	6.58228	2921	1254	Naive B cells	B cells	severe COVID-19 patient
toy	3482	1176	S1	ACTTATCCATGCACTA-1	Sample 1_nCoV 1 scRNA-seq [SW103]	GSM4509011	63	PBMC	M	COVID-19 patient	severe COVID-19 patient	10.3963	2788	1173	Non-switched memory B cells	B cells	severe COVID-19 patient
toy	8205	1847	S1	ACTTATCGTGTGCTTA-1	Sample 1_nCoV 1 scRNA-seq [SW103]	GSM4509011	63	PBMC	M	COVID-19 patient	severe COVID-19 patient	3.14442	2429	693	Th2 cells	CD4+ T cells	severe COVID-19 patient
toy	13410	3398	S1	ACTTATCTCCCGTGTT-1	Sample 1_nCoV 1 scRNA-seq [SW103]	GSM4509011	63	PBMC	M	COVID-19 patient	severe COVID-19 patient	6.89038	2546	1178	Classical monocytes	Monocytes	severe COVID-19 patient
toy	7583	2357	S1	ACTTATCTCTGGGAGA-1	Sample 1_nCoV 1 scRNA-seq [SW103]	GSM4509011	63	PBMC	M	COVID-19 patient	severe COVID-19 patient	8.96743	2461	1062	Classical monocytes	Monocytes	severe COVID-19 patient
toy	797	232	S1	ACTTCCGGTGGGCTCT-1	Sample 1_nCoV 1 scRNA-seq [SW103]	GSM4509011	63	PBMC	M	COVID-19 patient	severe COVID-19 patient	5.14429	1848	332	Erythroblast	Erythroblast	severe COVID-19 patient
toy	772	347	S1	ACTTCCGTCACTTTGT-1	Sample 1_nCoV 1 scRNA-seq [SW103]	GSM4509011	63	PBMC	M	COVID-19 patient	severe COVID-19 patient	12.5648	1981	438	Platelets	Platelets	severe COVID-19 patient
toy	7423	1784	S1	ACTTCCGTCCGCACGA-1	Sample 1_nCoV 1 scRNA-seq [SW103]	GSM4509011	63	PBMC	M	COVID-19 patient	severe COVID-19 patient	12.9732	2488	767	Naive B cells	B cells	severe COVID-19 patient
toy	9237	2467	S1	ACTTCCGTCGGTCGAC-1	Sample 1_nCoV 1 scRNA-seq [SW103]	GSM4509011	63	PBMC	M	COVID-19 patient	severe COVID-19 patient	12.3525	2357	869	Myeloid dendritic cells	Dendritic cells	severe COVID-19 patient
toy	5679	1670	S1	ACTTCGCCAAGAGTGC-1	Sample 1_nCoV 1 scRNA-seq [SW103]	GSM4509011	63	PBMC	M	COVID-19 patient	severe COVID-19 patient	7.62458	2972	1397	Central memory CD8 T cells	T cells	severe COVID-19 patient
toy	510	211	S1	ACTTCGCCAGACACAG-1	Sample 1_nCoV 1 scRNA-seq [SW103]	GSM4509011	63	PBMC	M	COVID-19 patient	severe COVID-19 patient	6.27451	1894	342	HSC_-G-CSF	HSC_-G-CSF	severe COVID-19 patient
toy	5924	1930	S1	ACTTCGCTCGCTCTAC-1	Sample 1_nCoV 1 scRNA-seq [SW103]	GSM4509011	63	PBMC	M	COVID-19 patient	severe COVID-19 patient	12.2215	2986	1546	Classical monocytes	Monocytes	severe COVID-19 patient
toy	16080	3522	S1	ACTTTCAAGGCTCTCG-1	Sample 1_nCoV 1 scRNA-seq [SW103]	GSM4509011	63	PBMC	M	COVID-19 patient	severe COVID-19 patient	7.8296	2592	1178	Classical monocytes	Monocytes	severe COVID-19 patient
toy	3702	1449	S1	ACTTTCAGTTGGTGTT-1	Sample 1_nCoV 1 scRNA-seq [SW103]	GSM4509011	63	PBMC	M	COVID-19 patient	severe COVID-19 patient	7.07726	2846	1438	Classical monocytes	Monocytes	severe COVID-19 patient
toy	458	232	S1	ACTTTCATCAAGCCAT-1	Sample 1_nCoV 1 scRNA-seq [SW103]	GSM4509011	63	PBMC	M	COVID-19 patient	severe COVID-19 patient	11.3537	1909	366	HSC_-G-CSF	HSC_-G-CSF	severe COVID-19 patient
toy	4261	1621	S1	ACTTTCATCCTACCGT-1	Sample 1_nCoV 1 scRNA-seq [SW103]	GSM4509011	63	PBMC	M	COVID-19 patient	severe COVID-19 patient	8.04975	2927	1589	Classical monocytes	Monocytes	severe COVID-19 patient
toy	8754	2176	S1	ACTTTCATCTATCGCC-1	Sample 1_nCoV 1 scRNA-seq [SW103]	GSM4509011	63	PBMC	M	COVID-19 patient	severe COVID-19 patient	5.66598	2427	855	Th2 cells	CD4+ T cells	severe COVID-19 patient
toy	2446	1230	S1	ACTTTGTAGGACAGCT-1	Sample 1_nCoV 1 scRNA-seq [SW103]	GSM4509011	63	PBMC	M	COVID-19 patient	severe COVID-19 patient	5.19215	2444	1228	Natural killer cells	NK cells	severe COVID-19 patient
toy	1317	667	S1	ACTTTGTCAGAGCTAG-1	Sample 1_nCoV 1 scRNA-seq [SW103]	GSM4509011	63	PBMC	M	COVID-19 patient	severe COVID-19 patient	16.0972	2108	677	Classical monocytes	NA	severe COVID-19 patient
toy	4762	1648	S1	ACTTTGTGTTTGATCG-1	Sample 1_nCoV 1 scRNA-seq [SW103]	GSM4509011	63	PBMC	M	COVID-19 patient	severe COVID-19 patient	11.3608	2985	1572	Classical monocytes	Monocytes	severe COVID-19 patient
toy	623	296	S1	ACTTTGTTCCATCTGC-1	Sample 1_nCoV 1 scRNA-seq [SW103]	GSM4509011	63	PBMC	M	COVID-19 patient	severe COVID-19 patient	5.45746	1850	416	Platelets	Platelets	severe COVID-19 patient
toy	6847	1814	S1	ACTTTGTTCTTCTGGC-1	Sample 1_nCoV 1 scRNA-seq [SW103]	GSM4509011	63	PBMC	M	COVID-19 patient	severe COVID-19 patient	7.90127	2734	1113	Th1/Th17 cells	T cells	severe COVID-19 patient
toy	485	236	S1	ACTTTGTTCTTGTGCC-1	Sample 1_nCoV 1 scRNA-seq [SW103]	GSM4509011	63	PBMC	M	COVID-19 patient	severe COVID-19 patient	7.21649	1846	382	HSC_-G-CSF	HSC_-G-CSF	severe COVID-19 patient
toy	762	437	S1	AGAAATGCAGCATTGT-1	Sample 1_nCoV 1 scRNA-seq [SW103]	GSM4509011	63	PBMC	M	COVID-19 patient	severe COVID-19 patient	4.46194	1899	514	HSC_-G-CSF	HSC_-G-CSF	severe COVID-19 patient
toy	5343	1928	S1	AGAAATGTCCGGACTG-1	Sample 1_nCoV 1 scRNA-seq [SW103]	GSM4509011	63	PBMC	M	COVID-19 patient	severe COVID-19 patient	9.26446	3099	1721	Natural killer cells	NK cells	severe COVID-19 patient
toy	7724	1925	S1	AGAACAAAGTAGAATC-1	Sample 1_nCoV 1 scRNA-seq [SW103]	GSM4509011	63	PBMC	M	COVID-19 patient	severe COVID-19 patient	5.19161	2387	719	Non-switched memory B cells	B cells	severe COVID-19 patient
toy	6092	1662	S1	AGAACAACACTGCACG-1	Sample 1_nCoV 1 scRNA-seq [SW103]	GSM4509011	63	PBMC	M	COVID-19 patient	severe COVID-19 patient	6.45108	2875	1230	Non-switched memory B cells	B cells	severe COVID-19 patient
toy	4840	1409	S1	AGAACAACAGAGTAAT-1	Sample 1_nCoV 1 scRNA-seq [SW103]	GSM4509011	63	PBMC	M	COVID-19 patient	severe COVID-19 patient	5.61983	2942	1317	Naive B cells	B cells	severe COVID-19 patient
toy	5851	1979	S1	AGAACAAGTTTACGAC-1	Sample 1_nCoV 1 scRNA-seq [SW103]	GSM4509011	63	PBMC	M	COVID-19 patient	severe COVID-19 patient	7.60554	3026	1605	Classical monocytes	Monocytes	severe COVID-19 patient
toy	9206	2546	S1	AGAACAATCGAGCACC-1	Sample 1_nCoV 1 scRNA-seq [SW103]	GSM4509011	63	PBMC	M	COVID-19 patient	severe COVID-19 patient	8.41842	2444	1017	Classical monocytes	Monocytes	severe COVID-19 patient
toy	22266	4516	S1	AGAACCTAGCAGGTCA-1	Sample 1_nCoV 1 scRNA-seq [SW103]	GSM4509011	63	PBMC	M	COVID-19 patient	severe COVID-19 patient	6.02713	2431	1088	Classical monocytes	Monocytes	severe COVID-19 patient
toy	9501	2747	S1	AGAACCTCACAATGAA-1	Sample 1_nCoV 1 scRNA-seq [SW103]	GSM4509011	63	PBMC	M	COVID-19 patient	severe COVID-19 patient	11.2304	2404	1032	Classical monocytes	Monocytes	severe COVID-19 patient
toy	5585	2088	S1	AGAACCTCACTTTATC-1	Sample 1_nCoV 1 scRNA-seq [SW103]	GSM4509011	63	PBMC	M	COVID-19 patient	severe COVID-19 patient	7.3769	3176	1821	Natural killer cells	NK cells	severe COVID-19 patient
toy	10503	2963	S1	AGAACCTTCGGAATGG-1	Sample 1_nCoV 1 scRNA-seq [SW103]	GSM4509011	63	PBMC	M	COVID-19 patient	severe COVID-19 patient	6.25536	2461	1126	Classical monocytes	Monocytes	severe COVID-19 patient
toy	1891	712	S1	AGAACCTTCTCTCTTC-1	Sample 1_nCoV 1 scRNA-seq [SW103]	GSM4509011	63	PBMC	M	COVID-19 patient	severe COVID-19 patient	3.64886	2175	710	Platelets	Platelets	severe COVID-19 patient
toy	640	347	S1	AGAAGCGAGTGGAAAG-1	Sample 1_nCoV 1 scRNA-seq [SW103]	GSM4509011	63	PBMC	M	COVID-19 patient	severe COVID-19 patient	5.78125	1822	470	Platelets	Platelets	severe COVID-19 patient
toy	1185	730	S1	AGAAGCGTCGTAATGC-1	Sample 1_nCoV 1 scRNA-seq [SW103]	GSM4509011	63	PBMC	M	COVID-19 patient	severe COVID-19 patient	2.53165	2126	802	Platelets	Platelets	severe COVID-19 patient
toy	1136	435	S1	AGAAGCGTCTTCGACC-1	Sample 1_nCoV 1 scRNA-seq [SW103]	GSM4509011	63	PBMC	M	COVID-19 patient	severe COVID-19 patient	4.66549	2199	489	Platelets	Platelets	severe COVID-19 patient
toy	6566	1773	S1	AGAAGTAAGCAACCAG-1	Sample 1_nCoV 1 scRNA-seq [SW103]	GSM4509011	63	PBMC	M	COVID-19 patient	severe COVID-19 patient	4.00548	2802	1168	Switched memory B cells	B cells	severe COVID-19 patient
toy	1164	495	S1	AGAAGTAAGTACCATC-1	Sample 1_nCoV 1 scRNA-seq [SW103]	GSM4509011	63	PBMC	M	COVID-19 patient	severe COVID-19 patient	3.52234	2164	552	Platelets	Platelets	severe COVID-19 patient
toy	1728	839	S1	AGAAGTACACATACTG-1	Sample 1_nCoV 1 scRNA-seq [SW103]	GSM4509011	63	PBMC	M	COVID-19 patient	severe COVID-19 patient	6.25	2144	839	Classical monocytes	Monocytes	severe COVID-19 patient
toy	6978	2303	S1	AGAAGTATCTCAAAGC-1	Sample 1_nCoV 1 scRNA-seq [SW103]	GSM4509011	63	PBMC	M	COVID-19 patient	severe COVID-19 patient	15.5489	2770	1396	Classical monocytes	Monocytes	severe COVID-19 patient
toy	6282	1529	S1	AGACAAAGTCTTCCGT-1	Sample 1_nCoV 1 scRNA-seq [SW103]	GSM4509011	63	PBMC	M	COVID-19 patient	severe COVID-19 patient	12.2572	2814	1065	T regulatory cells	CD4+ T cells	severe COVID-19 patient
toy	3801	1587	S1	AGACAAAGTTTATGCG-1	Sample 1_nCoV 1 scRNA-seq [SW103]	GSM4509011	63	PBMC	M	COVID-19 patient	severe COVID-19 patient	8.36622	2924	1575	Natural killer cells	NK cells	severe COVID-19 patient
toy	6337	1752	S1	AGACAAATCGATTCCC-1	Sample 1_nCoV 1 scRNA-seq [SW103]	GSM4509011	63	PBMC	M	COVID-19 patient	severe COVID-19 patient	14.5021	2900	1278	Naive B cells	B cells	severe COVID-19 patient
toy	3700	1415	S1	AGACACTGTCAGGTAG-1	Sample 1_nCoV 1 scRNA-seq [SW103]	GSM4509011	63	PBMC	M	COVID-19 patient	severe COVID-19 patient	6.24324	2834	1410	Classical monocytes	Monocytes	severe COVID-19 patient
toy	11276	2970	S1	AGACACTGTGTTGAGG-1	Sample 1_nCoV 1 scRNA-seq [SW103]	GSM4509011	63	PBMC	M	COVID-19 patient	severe COVID-19 patient	9.45371	2605	1161	Non classical monocytes	Monocytes	severe COVID-19 patient
toy	3834	1087	S1	AGACACTTCACCTCAC-1	Sample 1_nCoV 1 scRNA-seq [SW103]	GSM4509011	63	PBMC	M	COVID-19 patient	severe COVID-19 patient	8.29421	2867	1053	Platelets	Platelets	severe COVID-19 patient
toy	8568	1953	S1	AGACAGGAGGACAACC-1	Sample 1_nCoV 1 scRNA-seq [SW103]	GSM4509011	63	PBMC	M	COVID-19 patient	severe COVID-19 patient	5.32213	2361	664	Central memory CD8 T cells	CD8+ T cells	severe COVID-19 patient
toy	877	394	S1	AGACAGGCACCTGAAT-1	Sample 1_nCoV 1 scRNA-seq [SW103]	GSM4509011	63	PBMC	M	COVID-19 patient	severe COVID-19 patient	8.32383	2026	472	Platelets	Platelets	severe COVID-19 patient
toy	847	476	S1	AGACAGGCATAATCGC-1	Sample 1_nCoV 1 scRNA-seq [SW103]	GSM4509011	63	PBMC	M	COVID-19 patient	severe COVID-19 patient	2.83353	2035	523	NA	NA	severe COVID-19 patient
toy	2989	1221	S1	AGACAGGGTAGGTTTC-1	Sample 1_nCoV 1 scRNA-seq [SW103]	GSM4509011	63	PBMC	M	COVID-19 patient	severe COVID-19 patient	3.24523	2692	1219	NA	Monocytes	severe COVID-19 patient
toy	2135	879	S1	AGACCATAGCACACAG-1	Sample 1_nCoV 1 scRNA-seq [SW103]	GSM4509011	63	PBMC	M	COVID-19 patient	severe COVID-19 patient	10.3044	2288	879	Classical monocytes	Monocytes	severe COVID-19 patient
toy	428	307	S1	AGACCATAGCGTTACT-1	Sample 1_nCoV 1 scRNA-seq [SW103]	GSM4509011	63	PBMC	M	COVID-19 patient	severe COVID-19 patient	4.6729	1818	433	NA	NA	severe COVID-19 patient
toy	1207	429	S1	AGACCATCACTCAAGT-1	Sample 1_nCoV 1 scRNA-seq [SW103]	GSM4509011	63	PBMC	M	COVID-19 patient	severe COVID-19 patient	8.1193	2197	467	Platelets	Platelets	severe COVID-19 patient
toy	5036	1772	S1	AGACCATCAGTGACCC-1	Sample 1_nCoV 1 scRNA-seq [SW103]	GSM4509011	63	PBMC	M	COVID-19 patient	severe COVID-19 patient	5.38125	3071	1644	Classical monocytes	Monocytes	severe COVID-19 patient
toy	566	380	S1	AGACCATGTCAGGAGT-1	Sample 1_nCoV 1 scRNA-seq [SW103]	GSM4509011	63	PBMC	M	COVID-19 patient	severe COVID-19 patient	3.18021	1818	463	Myeloid dendritic cells	NA	severe COVID-19 patient
toy	5991	1679	S1	AGACCATGTTCACGAT-1	Sample 1_nCoV 1 scRNA-seq [SW103]	GSM4509011	63	PBMC	M	COVID-19 patient	severe COVID-19 patient	10.3489	2945	1307	Naive B cells	B cells	severe COVID-19 patient
toy	7594	2388	S1	AGACCCGAGATGCTAA-1	Sample 1_nCoV 1 scRNA-seq [SW103]	GSM4509011	63	PBMC	M	COVID-19 patient	severe COVID-19 patient	7.41375	2440	1076	Classical monocytes	Monocytes	severe COVID-19 patient
toy	1091	370	S1	AGACCCGCATGAATAG-1	Sample 1_nCoV 1 scRNA-seq [SW103]	GSM4509011	63	PBMC	M	COVID-19 patient	severe COVID-19 patient	15.0321	2174	427	Platelets	Platelets	severe COVID-19 patient
toy	7797	1665	S1	AGACCCGGTTAGGGTG-1	Sample 1_nCoV 1 scRNA-seq [SW103]	GSM4509011	63	PBMC	M	COVID-19 patient	severe COVID-19 patient	8.28524	2400	595	Naive B cells	B cells	severe COVID-19 patient
toy	14002	3340	S1	AGACCCGTCCAAGCCG-1	Sample 1_nCoV 1 scRNA-seq [SW103]	GSM4509011	63	PBMC	M	COVID-19 patient	severe COVID-19 patient	11.3984	2580	1196	Classical monocytes	Monocytes	severe COVID-19 patient
toy	5278	1505	S1	AGACCCGTCCACAGCG-1	Sample 1_nCoV 1 scRNA-seq [SW103]	GSM4509011	63	PBMC	M	COVID-19 patient	severe COVID-19 patient	14.1341	2956	1315	Vd2 gd T cells	T cells	severe COVID-19 patient
toy	260	204	S1	AGACCCGTCGAAGGAC-1	Sample 1_nCoV 1 scRNA-seq [SW103]	GSM4509011	63	PBMC	M	COVID-19 patient	severe COVID-19 patient	10.3846	1705	389	Intermediate monocytes	NA	severe COVID-19 patient
toy	632	286	S1	AGACTCACAGATCCTA-1	Sample 1_nCoV 1 scRNA-seq [SW103]	GSM4509011	63	PBMC	M	COVID-19 patient	severe COVID-19 patient	4.11392	1911	403	HSC_-G-CSF	HSC_-G-CSF	severe COVID-19 patient
toy	4473	1518	S1	AGACTCACATGTGTCA-1	Sample 1_nCoV 1 scRNA-seq [SW103]	GSM4509011	63	PBMC	M	COVID-19 patient	severe COVID-19 patient	17.4827	2945	1477	Classical monocytes	Monocytes	severe COVID-19 patient
toy	5089	1825	S1	AGACTCAGTAGGGAGG-1	Sample 1_nCoV 1 scRNA-seq [SW103]	GSM4509011	63	PBMC	M	COVID-19 patient	severe COVID-19 patient	10.1002	3071	1669	Natural killer cells	NK cells	severe COVID-19 patient
toy	6887	1748	S1	AGACTCATCCGTAGTA-1	Sample 1_nCoV 1 scRNA-seq [SW103]	GSM4509011	63	PBMC	M	COVID-19 patient	severe COVID-19 patient	3.38319	2733	1068	Follicular helper T cells	CD4+ T cells	severe COVID-19 patient
toy	6097	1672	S1	AGAGAATAGGACAGCT-1	Sample 1_nCoV 1 scRNA-seq [SW103]	GSM4509011	63	PBMC	M	COVID-19 patient	severe COVID-19 patient	7.47909	2863	1226	Naive CD8 T cells	CD8+ T cells	severe COVID-19 patient
toy	1285	630	S1	AGAGAATAGTCATCGT-1	Sample 1_nCoV 1 scRNA-seq [SW103]	GSM4509011	63	PBMC	M	COVID-19 patient	severe COVID-19 patient	12.7626	2014	701	NA	NA	severe COVID-19 patient
toy	6372	1566	S1	AGAGAATAGTCCGTCG-1	Sample 1_nCoV 1 scRNA-seq [SW103]	GSM4509011	63	PBMC	M	COVID-19 patient	severe COVID-19 patient	4.97489	2796	1064	Non-switched memory B cells	B cells	severe COVID-19 patient
toy	22152	4315	S1	AGAGAATCAACTCCCT-1	Sample 1_nCoV 1 scRNA-seq [SW103]	GSM4509011	63	PBMC	M	COVID-19 patient	severe COVID-19 patient	9.26779	2652	1226	Effector memory CD8 T cells	T cells	severe COVID-19 patient
toy	780	323	S1	AGAGAATCACTCCGGA-1	Sample 1_nCoV 1 scRNA-seq [SW103]	GSM4509011	63	PBMC	M	COVID-19 patient	severe COVID-19 patient	10	1987	420	Platelets	Platelets	severe COVID-19 patient
toy	525	267	S1	AGAGAATCAGGCTATT-1	Sample 1_nCoV 1 scRNA-seq [SW103]	GSM4509011	63	PBMC	M	COVID-19 patient	severe COVID-19 patient	14.2857	1819	405	HSC_-G-CSF	HSC_-G-CSF	severe COVID-19 patient
toy	4327	1474	S1	AGAGAATGTAACACGG-1	Sample 1_nCoV 1 scRNA-seq [SW103]	GSM4509011	63	PBMC	M	COVID-19 patient	severe COVID-19 patient	8.31985	2905	1441	Terminal effector CD4 T cells	T cells	severe COVID-19 patient
toy	10363	2457	S1	AGAGAATTCATTCTTG-1	Sample 1_nCoV 1 scRNA-seq [SW103]	GSM4509011	63	PBMC	M	COVID-19 patient	severe COVID-19 patient	8.81984	2459	886	Classical monocytes	Monocytes	severe COVID-19 patient
toy	2927	1260	S1	AGAGAGCAGCCTCGTG-1	Sample 1_nCoV 1 scRNA-seq [SW103]	GSM4509011	63	PBMC	M	COVID-19 patient	severe COVID-19 patient	5.67134	2678	1260	Classical monocytes	Monocytes	severe COVID-19 patient
toy	3743	1400	S1	AGAGAGCAGGTTCTTG-1	Sample 1_nCoV 1 scRNA-seq [SW103]	GSM4509011	63	PBMC	M	COVID-19 patient	severe COVID-19 patient	9.64467	2835	1391	Classical monocytes	Monocytes	severe COVID-19 patient
toy	10576	2738	S1	AGAGAGCAGTGTACCT-1	Sample 1_nCoV 1 scRNA-seq [SW103]	GSM4509011	63	PBMC	M	COVID-19 patient	severe COVID-19 patient	5.33283	2502	1050	Classical monocytes	Monocytes	severe COVID-19 patient
toy	3440	1525	S1	AGAGAGCGTAGCTTAC-1	Sample 1_nCoV 1 scRNA-seq [SW103]	GSM4509011	63	PBMC	M	COVID-19 patient	severe COVID-19 patient	6.30814	2871	1522	Classical monocytes	Monocytes	severe COVID-19 patient
toy	6588	982	S1	AGAGAGCGTGACCTGC-1	Sample 1_nCoV 1 scRNA-seq [SW103]	GSM4509011	63	PBMC	M	COVID-19 patient	severe COVID-19 patient	0.728597	3043	619	Platelets	Platelets	severe COVID-19 patient
toy	879	362	S1	AGAGAGCTCGACATAC-1	Sample 1_nCoV 1 scRNA-seq [SW103]	GSM4509011	63	PBMC	M	COVID-19 patient	severe COVID-19 patient	8.30489	2043	436	Platelets	Platelets	severe COVID-19 patient
toy	721	256	S1	AGAGCAGAGTCCGCGT-1	Sample 1_nCoV 1 scRNA-seq [SW103]	GSM4509011	63	PBMC	M	COVID-19 patient	severe COVID-19 patient	8.46047	2001	356	Platelets	Platelets	severe COVID-19 patient
toy	10088	2682	S1	AGAGCAGAGTGATGGC-1	Sample 1_nCoV 1 scRNA-seq [SW103]	GSM4509011	63	PBMC	M	COVID-19 patient	severe COVID-19 patient	4.15345	2508	1105	Classical monocytes	Monocytes	severe COVID-19 patient
toy	876	382	S1	AGAGCAGCAAGTGGTG-1	Sample 1_nCoV 1 scRNA-seq [SW103]	GSM4509011	63	PBMC	M	COVID-19 patient	severe COVID-19 patient	4.10959	2027	465	Platelets	Platelets	severe COVID-19 patient
toy	1915	972	S1	AGAGCAGGTTCTCGTC-1	Sample 1_nCoV 1 scRNA-seq [SW103]	GSM4509011	63	PBMC	M	COVID-19 patient	severe COVID-19 patient	10.4439	2178	971	Natural killer cells	NK cells	severe COVID-19 patient
toy	4446	1415	S1	AGAGCCCCACGCTGCA-1	Sample 1_nCoV 1 scRNA-seq [SW103]	GSM4509011	63	PBMC	M	COVID-19 patient	severe COVID-19 patient	10.1889	2915	1366	Terminal effector CD4 T cells	T cells	severe COVID-19 patient
toy	6168	1578	S1	AGAGCCCGTCGGTAAG-1	Sample 1_nCoV 1 scRNA-seq [SW103]	GSM4509011	63	PBMC	M	COVID-19 patient	severe COVID-19 patient	7.58755	2836	1144	Switched memory B cells	B cells	severe COVID-19 patient
toy	705	319	S1	AGATAGAAGATCGGTG-1	Sample 1_nCoV 1 scRNA-seq [SW103]	GSM4509011	63	PBMC	M	COVID-19 patient	severe COVID-19 patient	6.09929	1906	432	Platelets	Platelets	severe COVID-19 patient
toy	750	334	S1	AGATAGAAGTACCCTA-1	Sample 1_nCoV 1 scRNA-seq [SW103]	GSM4509011	63	PBMC	M	COVID-19 patient	severe COVID-19 patient	6.8	1950	426	HSC_-G-CSF	HSC_-G-CSF	severe COVID-19 patient
toy	6508	2101	S1	AGATAGACAACGGGTA-1	Sample 1_nCoV 1 scRNA-seq [SW103]	GSM4509011	63	PBMC	M	COVID-19 patient	severe COVID-19 patient	8.32821	2957	1509	Natural killer cells	NK cells	severe COVID-19 patient
toy	656	302	S1	AGATAGACACGATAGG-1	Sample 1_nCoV 1 scRNA-seq [SW103]	GSM4509011	63	PBMC	M	COVID-19 patient	severe COVID-19 patient	7.92683	1898	414	HSC_-G-CSF	HSC_-G-CSF	severe COVID-19 patient
toy	521	340	S1	AGATAGAGTTCTCACC-1	Sample 1_nCoV 1 scRNA-seq [SW103]	GSM4509011	63	PBMC	M	COVID-19 patient	severe COVID-19 patient	4.03071	1700	487	Platelets	Platelets	severe COVID-19 patient
toy	630	274	S1	AGATAGAGTTGAGGAC-1	Sample 1_nCoV 1 scRNA-seq [SW103]	GSM4509011	63	PBMC	M	COVID-19 patient	severe COVID-19 patient	11.1111	1890	402	HSC_-G-CSF	HSC_-G-CSF	severe COVID-19 patient
toy	770	390	S1	AGATAGATCGAGCTGC-1	Sample 1_nCoV 1 scRNA-seq [SW103]	GSM4509011	63	PBMC	M	COVID-19 patient	severe COVID-19 patient	5.45455	1908	492	Platelets	Platelets	severe COVID-19 patient
toy	506	251	S1	AGATAGATCGCGCCAA-1	Sample 1_nCoV 1 scRNA-seq [SW103]	GSM4509011	63	PBMC	M	COVID-19 patient	severe COVID-19 patient	3.35968	1804	387	HSC_-G-CSF	HSC_-G-CSF	severe COVID-19 patient
toy	4881	1733	S1	AGATAGATCTTGCAGA-1	Sample 1_nCoV 1 scRNA-seq [SW103]	GSM4509011	63	PBMC	M	COVID-19 patient	severe COVID-19 patient	8.66626	3047	1628	Non-Vd2 gd T cells	T cells	severe COVID-19 patient
toy	16705	3632	S1	AGATCCAAGCTAGAAT-1	Sample 1_nCoV 1 scRNA-seq [SW103]	GSM4509011	63	PBMC	M	COVID-19 patient	severe COVID-19 patient	8.03951	2625	1167	Non classical monocytes	Monocytes	severe COVID-19 patient
toy	6151	1924	S1	AGATCCACATGTACGT-1	Sample 1_nCoV 1 scRNA-seq [SW103]	GSM4509011	63	PBMC	M	COVID-19 patient	severe COVID-19 patient	8.01496	2898	1424	Classical monocytes	Monocytes	severe COVID-19 patient
toy	6595	1643	S1	AGATCCAGTCGCATGC-1	Sample 1_nCoV 1 scRNA-seq [SW103]	GSM4509011	63	PBMC	M	COVID-19 patient	severe COVID-19 patient	8.11221	2724	1046	Th17 cells	CD4+ T cells	severe COVID-19 patient
toy	12400	3284	S1	AGATCCAGTGTAGCAG-1	Sample 1_nCoV 1 scRNA-seq [SW103]	GSM4509011	63	PBMC	M	COVID-19 patient	severe COVID-19 patient	17	2536	1176	Classical monocytes	Monocytes	severe COVID-19 patient
toy	6472	2066	S1	AGATCCATCCTCTAGC-1	Sample 1_nCoV 1 scRNA-seq [SW103]	GSM4509011	63	PBMC	M	COVID-19 patient	severe COVID-19 patient	9.54883	2869	1429	Classical monocytes	Monocytes	severe COVID-19 patient
toy	4925	1743	S1	AGATCGTAGCGAGAAA-1	Sample 1_nCoV 1 scRNA-seq [SW103]	GSM4509011	63	PBMC	M	COVID-19 patient	severe COVID-19 patient	7.91878	3064	1640	Effector memory CD8 T cells	T cells	severe COVID-19 patient
toy	8419	2479	S1	AGATCGTGTAAGGAGA-1	Sample 1_nCoV 1 scRNA-seq [SW103]	GSM4509011	63	PBMC	M	COVID-19 patient	severe COVID-19 patient	9.47856	2452	1039	Intermediate monocytes	Monocytes	severe COVID-19 patient
toy	7133	2310	S1	AGATCGTGTCACCCTT-1	Sample 1_nCoV 1 scRNA-seq [SW103]	GSM4509011	63	PBMC	M	COVID-19 patient	severe COVID-19 patient	4.28992	2622	1283	Classical monocytes	Monocytes	severe COVID-19 patient
toy	463	249	S1	AGATCGTGTGACACAG-1	Sample 1_nCoV 1 scRNA-seq [SW103]	GSM4509011	63	PBMC	M	COVID-19 patient	severe COVID-19 patient	16.6307	1850	403	Progenitor cells	NA	severe COVID-19 patient
toy	3365	1227	S1	AGATCGTGTTGACGGA-1	Sample 1_nCoV 1 scRNA-seq [SW103]	GSM4509011	63	PBMC	M	COVID-19 patient	severe COVID-19 patient	3.06092	2803	1216	Platelets	Platelets	severe COVID-19 patient
toy	10972	2187	S1	AGATCGTTCATTGAGC-1	Sample 1_nCoV 1 scRNA-seq [SW103]	GSM4509011	63	PBMC	M	COVID-19 patient	severe COVID-19 patient	9.56981	2420	673	Th17 cells	CD4+ T cells	severe COVID-19 patient
toy	514	243	S1	AGATGAAAGAGCTGCA-1	Sample 1_nCoV 1 scRNA-seq [SW103]	GSM4509011	63	PBMC	M	COVID-19 patient	severe COVID-19 patient	9.92218	1839	389	HSC_-G-CSF	HSC_-G-CSF	severe COVID-19 patient
toy	2517	1025	S1	AGATGAAAGGTACCTT-1	Sample 1_nCoV 1 scRNA-seq [SW103]	GSM4509011	63	PBMC	M	COVID-19 patient	severe COVID-19 patient	15.0576	2495	1025	Low-density neutrophils	Neutrophils	severe COVID-19 patient
toy	2987	242	S1	AGATGAACAGACCAGA-1	Sample 1_nCoV 1 scRNA-seq [SW103]	GSM4509011	63	PBMC	M	COVID-19 patient	severe COVID-19 patient	0.703047	2646	242	Erythroblast	Erythroblast	severe COVID-19 patient
toy	4839	1481	S1	AGATGAATCCTTATAC-1	Sample 1_nCoV 1 scRNA-seq [SW103]	GSM4509011	63	PBMC	M	COVID-19 patient	severe COVID-19 patient	6.79893	2981	1392	Naive B cells	B cells	severe COVID-19 patient
toy	1158	491	S1	AGATGAATCTCATTGT-1	Sample 1_nCoV 1 scRNA-seq [SW103]	GSM4509011	63	PBMC	M	COVID-19 patient	severe COVID-19 patient	4.23143	2191	553	Platelets	Platelets	severe COVID-19 patient
toy	5184	1715	S1	AGATGAATCTGGGCAC-1	Sample 1_nCoV 1 scRNA-seq [SW103]	GSM4509011	63	PBMC	M	COVID-19 patient	severe COVID-19 patient	6.65509	3033	1557	Natural killer cells	NK cells	severe COVID-19 patient
toy	5554	1787	S1	AGATGCTGTTGGTACT-1	Sample 1_nCoV 1 scRNA-seq [SW103]	GSM4509011	63	PBMC	M	COVID-19 patient	severe COVID-19 patient	10.1728	3044	1557	Terminal effector CD8 T cells	T cells	severe COVID-19 patient
toy	1374	222	S1	AGATGCTTCCATCGTC-1	Sample 1_nCoV 1 scRNA-seq [SW103]	GSM4509011	63	PBMC	M	COVID-19 patient	severe COVID-19 patient	3.56623	2032	282	Erythroblast	Erythroblast	severe COVID-19 patient
toy	7702	2250	S1	AGATGCTTCCGCAGTG-1	Sample 1_nCoV 1 scRNA-seq [SW103]	GSM4509011	63	PBMC	M	COVID-19 patient	severe COVID-19 patient	8.37445	2481	1009	Vd2 gd T cells	T cells	severe COVID-19 patient
toy	3429	278	S1	AGCATCAAGGATCATA-1	Sample 1_nCoV 1 scRNA-seq [SW103]	GSM4509011	63	PBMC	M	COVID-19 patient	severe COVID-19 patient	1.3415	2750	261	Erythroblast	Erythroblast	severe COVID-19 patient
toy	9523	2721	S1	AGCATCAAGTTTCGGT-1	Sample 1_nCoV 1 scRNA-seq [SW103]	GSM4509011	63	PBMC	M	COVID-19 patient	severe COVID-19 patient	4.6729	2445	1010	Effector memory CD8 T cells	T cells	severe COVID-19 patient
toy	1598	524	S1	AGCATCACAGGTAGTG-1	Sample 1_nCoV 1 scRNA-seq [SW103]	GSM4509011	63	PBMC	M	COVID-19 patient	severe COVID-19 patient	3.06633	2168	527	Platelets	Platelets	severe COVID-19 patient
toy	5829	1966	S1	AGCATCAGTCATCAGT-1	Sample 1_nCoV 1 scRNA-seq [SW103]	GSM4509011	63	PBMC	M	COVID-19 patient	severe COVID-19 patient	6.19317	3035	1616	Classical monocytes	Monocytes	severe COVID-19 patient
toy	560	320	S1	AGCATCAGTGGACCTC-1	Sample 1_nCoV 1 scRNA-seq [SW103]	GSM4509011	63	PBMC	M	COVID-19 patient	severe COVID-19 patient	1.60714	1827	416	NA	NA	severe COVID-19 patient
toy	1385	769	S1	AGCATCATCATGGTAC-1	Sample 1_nCoV 1 scRNA-seq [SW103]	GSM4509011	63	PBMC	M	COVID-19 patient	severe COVID-19 patient	14.3682	2044	776	Classical monocytes	Monocytes	severe COVID-19 patient
toy	508	230	S1	AGCATCATCCCGTGTT-1	Sample 1_nCoV 1 scRNA-seq [SW103]	GSM4509011	63	PBMC	M	COVID-19 patient	severe COVID-19 patient	13.5827	1875	364	HSC_-G-CSF	HSC_-G-CSF	severe COVID-19 patient
toy	4645	284	S1	AGCCAATAGGGTTTCT-1	Sample 1_nCoV 1 scRNA-seq [SW103]	GSM4509011	63	PBMC	M	COVID-19 patient	severe COVID-19 patient	1.91604	3007	237	Erythroblast	Erythroblast	severe COVID-19 patient
toy	5366	1872	S1	AGCCAATCAAGAATGT-1	Sample 1_nCoV 1 scRNA-seq [SW103]	GSM4509011	63	PBMC	M	COVID-19 patient	severe COVID-19 patient	7.02572	3113	1695	Natural killer cells	NK cells	severe COVID-19 patient
toy	9378	2742	S1	AGCCAATGTACGCTAT-1	Sample 1_nCoV 1 scRNA-seq [SW103]	GSM4509011	63	PBMC	M	COVID-19 patient	severe COVID-19 patient	8.97846	2389	1028	Classical monocytes	Monocytes	severe COVID-19 patient
toy	2698	906	S1	AGCCAATTCATAGGCT-1	Sample 1_nCoV 1 scRNA-seq [SW103]	GSM4509011	63	PBMC	M	COVID-19 patient	severe COVID-19 patient	12.083	2546	906	Th1 cells	CD4+ T cells	severe COVID-19 patient
toy	4390	1578	S1	AGCCAATTCCTCGATC-1	Sample 1_nCoV 1 scRNA-seq [SW103]	GSM4509011	63	PBMC	M	COVID-19 patient	severe COVID-19 patient	5.96811	2923	1540	Classical monocytes	Monocytes	severe COVID-19 patient
toy	6838	2037	S1	AGCCAATTCGTGCAGC-1	Sample 1_nCoV 1 scRNA-seq [SW103]	GSM4509011	63	PBMC	M	COVID-19 patient	severe COVID-19 patient	12.7669	2770	1286	Effector memory CD8 T cells	T cells	severe COVID-19 patient
toy	2913	277	S1	AGCCACGAGCCAAGCA-1	Sample 1_nCoV 1 scRNA-seq [SW103]	GSM4509011	63	PBMC	M	COVID-19 patient	severe COVID-19 patient	0.892551	2623	275	Erythroblast	Erythroblast	severe COVID-19 patient
toy	5132	1681	S1	AGCCACGGTGAATGAT-1	Sample 1_nCoV 1 scRNA-seq [SW103]	GSM4509011	63	PBMC	M	COVID-19 patient	severe COVID-19 patient	10.9314	3060	1529	Natural killer cells	NK cells	severe COVID-19 patient
toy	4780	1507	S1	AGCCACGTCAGACAAA-1	Sample 1_nCoV 1 scRNA-seq [SW103]	GSM4509011	63	PBMC	M	COVID-19 patient	severe COVID-19 patient	3.95397	2964	1409	Naive CD4 T cells	CD4+ T cells	severe COVID-19 patient
toy	3399	1600	S1	AGCCACGTCGACGACC-1	Sample 1_nCoV 1 scRNA-seq [SW103]	GSM4509011	63	PBMC	M	COVID-19 patient	severe COVID-19 patient	5.14857	2876	1600	Natural killer cells	NK cells	severe COVID-19 patient
toy	12578	3103	S1	AGCCACGTCTTACGGA-1	Sample 1_nCoV 1 scRNA-seq [SW103]	GSM4509011	63	PBMC	M	COVID-19 patient	severe COVID-19 patient	9.74718	2545	1140	Classical monocytes	Monocytes	severe COVID-19 patient
toy	1396	649	S1	AGCCAGCAGGACTAAT-1	Sample 1_nCoV 1 scRNA-seq [SW103]	GSM4509011	63	PBMC	M	COVID-19 patient	severe COVID-19 patient	11.3181	2112	651	Non-Vd2 gd T cells	NA	severe COVID-19 patient
toy	5562	1578	S1	AGCCAGCAGGGAGTGG-1	Sample 1_nCoV 1 scRNA-seq [SW103]	GSM4509011	63	PBMC	M	COVID-19 patient	severe COVID-19 patient	8.98957	2971	1353	Non-Vd2 gd T cells	T cells	severe COVID-19 patient
toy	230	206	S1	AGCCAGCAGTAGTCCT-1	Sample 1_nCoV 1 scRNA-seq [SW103]	GSM4509011	63	PBMC	M	COVID-19 patient	severe COVID-19 patient	5.65217	1640	405	Myeloid dendritic cells	NA	severe COVID-19 patient
toy	1683	758	S1	AGCCAGCCAACTGAAA-1	Sample 1_nCoV 1 scRNA-seq [SW103]	GSM4509011	63	PBMC	M	COVID-19 patient	severe COVID-19 patient	3.92157	2169	756	Th1 cells	CD4+ T cells	severe COVID-19 patient
toy	4943	1612	S1	AGCGATTAGAAATCCA-1	Sample 1_nCoV 1 scRNA-seq [SW103]	GSM4509011	63	PBMC	M	COVID-19 patient	severe COVID-19 patient	3.4999	2995	1487	Non-Vd2 gd T cells	T cells	severe COVID-19 patient
toy	12354	3070	S1	AGCGATTAGCCTTCTC-1	Sample 1_nCoV 1 scRNA-seq [SW103]	GSM4509011	63	PBMC	M	COVID-19 patient	severe COVID-19 patient	7.99741	2581	1164	Classical monocytes	Monocytes	severe COVID-19 patient
toy	5970	1504	S1	AGCGATTAGCTAGCCC-1	Sample 1_nCoV 1 scRNA-seq [SW103]	GSM4509011	63	PBMC	M	COVID-19 patient	severe COVID-19 patient	6.93467	2876	1149	Naive B cells	B cells	severe COVID-19 patient
toy	4453	1741	S1	AGCGATTAGGCACTCC-1	Sample 1_nCoV 1 scRNA-seq [SW103]	GSM4509011	63	PBMC	M	COVID-19 patient	severe COVID-19 patient	7.88233	3005	1700	Classical monocytes	Monocytes	severe COVID-19 patient
toy	4049	1183	S1	AGCGATTGTAACTGCT-1	Sample 1_nCoV 1 scRNA-seq [SW103]	GSM4509011	63	PBMC	M	COVID-19 patient	severe COVID-19 patient	7.45863	2803	1165	Naive B cells	B cells	severe COVID-19 patient
toy	2451	257	S1	AGCGATTGTTCTCTAT-1	Sample 1_nCoV 1 scRNA-seq [SW103]	GSM4509011	63	PBMC	M	COVID-19 patient	severe COVID-19 patient	4.24317	2449	257	Erythroblast	Erythroblast	severe COVID-19 patient
toy	6417	1477	S1	AGCGCCAAGCAACCAG-1	Sample 1_nCoV 1 scRNA-seq [SW103]	GSM4509011	63	PBMC	M	COVID-19 patient	severe COVID-19 patient	5.9841	2775	1005	Naive B cells	B cells	severe COVID-19 patient
toy	934	377	S1	AGCGCCAAGCAGGGAG-1	Sample 1_nCoV 1 scRNA-seq [SW103]	GSM4509011	63	PBMC	M	COVID-19 patient	severe COVID-19 patient	7.70878	2059	455	Platelets	Platelets	severe COVID-19 patient
toy	6391	1530	S1	AGCGCCAAGGTCACTT-1	Sample 1_nCoV 1 scRNA-seq [SW103]	GSM4509011	63	PBMC	M	COVID-19 patient	severe COVID-19 patient	7.91738	2807	1063	Naive B cells	B cells	severe COVID-19 patient
toy	3390	1148	S1	AGCGCCACAACGATTC-1	Sample 1_nCoV 1 scRNA-seq [SW103]	GSM4509011	63	PBMC	M	COVID-19 patient	severe COVID-19 patient	6.10619	2765	1147	Naive B cells	B cells	severe COVID-19 patient
toy	4927	1454	S1	AGCGCCACACGTCTCT-1	Sample 1_nCoV 1 scRNA-seq [SW103]	GSM4509011	63	PBMC	M	COVID-19 patient	severe COVID-19 patient	5.48001	2940	1345	Naive CD4 T cells	CD4+ T cells	severe COVID-19 patient
toy	782	298	S1	AGCGCCAGTAGGTCAG-1	Sample 1_nCoV 1 scRNA-seq [SW103]	GSM4509011	63	PBMC	M	COVID-19 patient	severe COVID-19 patient	10.9974	2019	386	HSC_-G-CSF	HSC_-G-CSF	severe COVID-19 patient
toy	5632	1906	S1	AGCGCCATCAAGCGTT-1	Sample 1_nCoV 1 scRNA-seq [SW103]	GSM4509011	63	PBMC	M	COVID-19 patient	severe COVID-19 patient	9.26847	3103	1651	Natural killer cells	NK cells	severe COVID-19 patient
toy	1611	499	S1	AGCGCCATCACATTGG-1	Sample 1_nCoV 1 scRNA-seq [SW103]	GSM4509011	63	PBMC	M	COVID-19 patient	severe COVID-19 patient	5.27623	2194	500	Platelets	Platelets	severe COVID-19 patient
toy	836	339	S1	AGCGCCATCACCATCC-1	Sample 1_nCoV 1 scRNA-seq [SW103]	GSM4509011	63	PBMC	M	COVID-19 patient	severe COVID-19 patient	7.41627	2003	428	Platelets	Platelets	severe COVID-19 patient
toy	11595	2547	S1	AGCGCTGAGGATACCG-1	Sample 1_nCoV 1 scRNA-seq [SW103]	GSM4509011	63	PBMC	M	COVID-19 patient	severe COVID-19 patient	5.21777	2514	879	T regulatory cells	CD4+ T cells	severe COVID-19 patient
toy	1968	946	S1	AGCGCTGCATTGAGCT-1	Sample 1_nCoV 1 scRNA-seq [SW103]	GSM4509011	63	PBMC	M	COVID-19 patient	severe COVID-19 patient	11.2297	2199	946	Classical monocytes	Monocytes	severe COVID-19 patient
toy	6149	1731	S1	AGCGCTGGTGGTCAAG-1	Sample 1_nCoV 1 scRNA-seq [SW103]	GSM4509011	63	PBMC	M	COVID-19 patient	severe COVID-19 patient	5.64319	2876	1266	Non-switched memory B cells	B cells	severe COVID-19 patient
toy	4722	1793	S1	AGCGCTGTCTGGCTGG-1	Sample 1_nCoV 1 scRNA-seq [SW103]	GSM4509011	63	PBMC	M	COVID-19 patient	severe COVID-19 patient	7.94155	3062	1725	Natural killer cells	NK cells	severe COVID-19 patient
toy	292	203	S1	AGCGCTGTCTTCTAAC-1	Sample 1_nCoV 1 scRNA-seq [SW103]	GSM4509011	63	PBMC	M	COVID-19 patient	severe COVID-19 patient	7.87671	1722	385	Myeloid dendritic cells	Dendritic cells	severe COVID-19 patient
toy	4510	1636	S1	AGCGCTGTCTTGCGCT-1	Sample 1_nCoV 1 scRNA-seq [SW103]	GSM4509011	63	PBMC	M	COVID-19 patient	severe COVID-19 patient	13.459	2994	1583	Classical monocytes	Monocytes	severe COVID-19 patient
toy	21538	3931	S1	AGCGTATGTCCGGTCA-1	Sample 1_nCoV 1 scRNA-seq [SW103]	GSM4509011	63	PBMC	M	COVID-19 patient	severe COVID-19 patient	6.33764	2418	804	Switched memory B cells	B cells	severe COVID-19 patient
toy	3613	1399	S1	AGCGTCGAGATTGACA-1	Sample 1_nCoV 1 scRNA-seq [SW103]	GSM4509011	63	PBMC	M	COVID-19 patient	severe COVID-19 patient	5.95073	2824	1398	Classical monocytes	Monocytes	severe COVID-19 patient
toy	575	207	S1	AGCGTCGCAACTGCCG-1	Sample 1_nCoV 1 scRNA-seq [SW103]	GSM4509011	63	PBMC	M	COVID-19 patient	severe COVID-19 patient	19.3043	1944	342	HSC_-G-CSF	HSC_-G-CSF	severe COVID-19 patient
toy	8554	2575	S1	AGCGTCGCACTACCGG-1	Sample 1_nCoV 1 scRNA-seq [SW103]	GSM4509011	63	PBMC	M	COVID-19 patient	severe COVID-19 patient	6.73369	2366	1006	Classical monocytes	Monocytes	severe COVID-19 patient
toy	3657	1376	S1	AGCTACAAGACAGTCG-1	Sample 1_nCoV 1 scRNA-seq [SW103]	GSM4509011	63	PBMC	M	COVID-19 patient	severe COVID-19 patient	6.45338	2846	1364	Classical monocytes	Monocytes	severe COVID-19 patient
toy	11056	2420	S1	AGCTACAAGTGCAACG-1	Sample 1_nCoV 1 scRNA-seq [SW103]	GSM4509011	63	PBMC	M	COVID-19 patient	severe COVID-19 patient	7.67909	2402	713	Switched memory B cells	B cells	severe COVID-19 patient
toy	5304	1847	S1	AGCTACACAGGTACGA-1	Sample 1_nCoV 1 scRNA-seq [SW103]	GSM4509011	63	PBMC	M	COVID-19 patient	severe COVID-19 patient	8.25792	3079	1668	Natural killer cells	NK cells	severe COVID-19 patient
toy	5600	1280	S1	AGCTACACATTACTCT-1	Sample 1_nCoV 1 scRNA-seq [SW103]	GSM4509011	63	PBMC	M	COVID-19 patient	severe COVID-19 patient	5.03571	3042	1088	Platelets	Platelets	severe COVID-19 patient
toy	6421	1696	S1	AGCTCAAGTCCTCAGG-1	Sample 1_nCoV 1 scRNA-seq [SW103]	GSM4509011	63	PBMC	M	COVID-19 patient	severe COVID-19 patient	9.15745	2814	1178	Central memory CD8 T cells	CD8+ T cells	severe COVID-19 patient
toy	5088	1785	S1	AGCTCAAGTTCGAAGG-1	Sample 1_nCoV 1 scRNA-seq [SW103]	GSM4509011	63	PBMC	M	COVID-19 patient	severe COVID-19 patient	6.34827	3040	1635	Classical monocytes	Monocytes	severe COVID-19 patient
toy	4699	1540	S1	AGCTCAAGTTTGTTGG-1	Sample 1_nCoV 1 scRNA-seq [SW103]	GSM4509011	63	PBMC	M	COVID-19 patient	severe COVID-19 patient	8.02298	2968	1457	Natural killer cells	NK cells	severe COVID-19 patient
toy	6633	1628	S1	AGCTCAATCATAGAGA-1	Sample 1_nCoV 1 scRNA-seq [SW103]	GSM4509011	63	PBMC	M	COVID-19 patient	severe COVID-19 patient	5.29172	2768	1061	Non-switched memory B cells	B cells	severe COVID-19 patient
toy	6207	2055	S1	AGCTTCCAGACTCCGC-1	Sample 1_nCoV 1 scRNA-seq [SW103]	GSM4509011	63	PBMC	M	COVID-19 patient	severe COVID-19 patient	5.26825	2985	1551	Non-Vd2 gd T cells	T cells	severe COVID-19 patient
toy	14429	2991	S1	AGCTTCCGTGTGGACA-1	Sample 1_nCoV 1 scRNA-seq [SW103]	GSM4509011	63	PBMC	M	COVID-19 patient	severe COVID-19 patient	5.03153	2469	896	T regulatory cells	CD4+ T cells	severe COVID-19 patient
toy	8602	2540	S1	AGCTTCCGTTGCCGAC-1	Sample 1_nCoV 1 scRNA-seq [SW103]	GSM4509011	63	PBMC	M	COVID-19 patient	severe COVID-19 patient	13.6829	2461	1050	Classical monocytes	Monocytes	severe COVID-19 patient
toy	497	255	S1	AGCTTCCTCGCGTGAC-1	Sample 1_nCoV 1 scRNA-seq [SW103]	GSM4509011	63	PBMC	M	COVID-19 patient	severe COVID-19 patient	9.85915	1831	402	HSC_-G-CSF	HSC_-G-CSF	severe COVID-19 patient
toy	5928	2034	S1	AGGAAATAGTAAATGC-1	Sample 1_nCoV 1 scRNA-seq [SW103]	GSM4509011	63	PBMC	M	COVID-19 patient	severe COVID-19 patient	4.77395	2993	1617	NA	Monocytes	severe COVID-19 patient
toy	11546	3148	S1	AGGAAATCAGCATACT-1	Sample 1_nCoV 1 scRNA-seq [SW103]	GSM4509011	63	PBMC	M	COVID-19 patient	severe COVID-19 patient	11.1381	2557	1224	Classical monocytes	Monocytes	severe COVID-19 patient
toy	5904	1672	S1	AGGAAATCAGTGCGCT-1	Sample 1_nCoV 1 scRNA-seq [SW103]	GSM4509011	63	PBMC	M	COVID-19 patient	severe COVID-19 patient	4.77642	2938	1335	Naive CD4 T cells	CD4+ T cells	severe COVID-19 patient
toy	2423	777	S1	AGGAAATTCTCTTCAA-1	Sample 1_nCoV 1 scRNA-seq [SW103]	GSM4509011	63	PBMC	M	COVID-19 patient	severe COVID-19 patient	2.47627	2425	777	Non-switched memory B cells	B cells	severe COVID-19 patient
toy	13532	3203	S1	AGGAATAAGGTGCGAT-1	Sample 1_nCoV 1 scRNA-seq [SW103]	GSM4509011	63	PBMC	M	COVID-19 patient	severe COVID-19 patient	11.2918	2563	1048	Classical monocytes	Monocytes	severe COVID-19 patient
toy	3927	1510	S1	AGGAATACAGCAGTCC-1	Sample 1_nCoV 1 scRNA-seq [SW103]	GSM4509011	63	PBMC	M	COVID-19 patient	severe COVID-19 patient	10.7461	2881	1502	Natural killer cells	NK cells	severe COVID-19 patient
toy	442	277	S1	AGGAATACATCCTGTC-1	Sample 1_nCoV 1 scRNA-seq [SW103]	GSM4509011	63	PBMC	M	COVID-19 patient	severe COVID-19 patient	0.904977	1849	397	NA	Monocytes	severe COVID-19 patient
toy	481	223	S1	AGGAATATCGTAACAC-1	Sample 1_nCoV 1 scRNA-seq [SW103]	GSM4509011	63	PBMC	M	COVID-19 patient	severe COVID-19 patient	11.4345	1862	366	Progenitor cells	NA	severe COVID-19 patient
toy	2777	270	S1	AGGACGAAGAGGATCC-1	Sample 1_nCoV 1 scRNA-seq [SW103]	GSM4509011	63	PBMC	M	COVID-19 patient	severe COVID-19 patient	0.432121	2580	270	Progenitor cells	NA	severe COVID-19 patient
toy	10612	2421	S1	AGGACGAAGCATGCGA-1	Sample 1_nCoV 1 scRNA-seq [SW103]	GSM4509011	63	PBMC	M	COVID-19 patient	severe COVID-19 patient	7.87787	2432	822	Th1/Th17 cells	CD4+ T cells	severe COVID-19 patient
toy	719	285	S1	AGGACGAAGTTGGCGA-1	Sample 1_nCoV 1 scRNA-seq [SW103]	GSM4509011	63	PBMC	M	COVID-19 patient	severe COVID-19 patient	4.58971	1957	387	HSC_-G-CSF	HSC_-G-CSF	severe COVID-19 patient
toy	6637	1752	S1	AGGACGACACCCTATC-1	Sample 1_nCoV 1 scRNA-seq [SW103]	GSM4509011	63	PBMC	M	COVID-19 patient	severe COVID-19 patient	8.49782	2801	1145	Naive B cells	B cells	severe COVID-19 patient
toy	5851	1698	S1	AGGACGAGTATGGAGC-1	Sample 1_nCoV 1 scRNA-seq [SW103]	GSM4509011	63	PBMC	M	COVID-19 patient	severe COVID-19 patient	6.93898	2967	1386	Th1/Th17 cells	CD4+ T cells	severe COVID-19 patient
toy	2803	232	S1	AGGACGAGTTCTCACC-1	Sample 1_nCoV 1 scRNA-seq [SW103]	GSM4509011	63	PBMC	M	COVID-19 patient	severe COVID-19 patient	1.89083	2590	232	Erythroblast	Erythroblast	severe COVID-19 patient
toy	4183	249	S1	AGGACGATCGTCTACC-1	Sample 1_nCoV 1 scRNA-seq [SW103]	GSM4509011	63	PBMC	M	COVID-19 patient	severe COVID-19 patient	0.788907	2908	217	Erythroblast	Erythroblast	severe COVID-19 patient
toy	9974	2096	S1	AGGACTTAGAAGGGAT-1	Sample 1_nCoV 1 scRNA-seq [SW103]	GSM4509011	63	PBMC	M	COVID-19 patient	severe COVID-19 patient	4.06056	2399	676	Th1/Th17 cells	CD4+ T cells	severe COVID-19 patient
toy	6365	2096	S1	AGGACTTCAAAGGGCT-1	Sample 1_nCoV 1 scRNA-seq [SW103]	GSM4509011	63	PBMC	M	COVID-19 patient	severe COVID-19 patient	6.73998	2946	1499	Classical monocytes	Monocytes	severe COVID-19 patient
toy	5898	1945	S1	AGGACTTCAACGTATC-1	Sample 1_nCoV 1 scRNA-seq [SW103]	GSM4509011	63	PBMC	M	COVID-19 patient	severe COVID-19 patient	11.1563	3020	1557	Vd2 gd T cells	T cells	severe COVID-19 patient
toy	7027	2308	S1	AGGACTTCAGGTTCAT-1	Sample 1_nCoV 1 scRNA-seq [SW103]	GSM4509011	63	PBMC	M	COVID-19 patient	severe COVID-19 patient	11.4416	2678	1314	Classical monocytes	Monocytes	severe COVID-19 patient
toy	5058	1552	S1	AGGACTTCAGTTCCAA-1	Sample 1_nCoV 1 scRNA-seq [SW103]	GSM4509011	63	PBMC	M	COVID-19 patient	severe COVID-19 patient	5.33808	2981	1417	Vd2 gd T cells	CD8+ T cells	severe COVID-19 patient
toy	5977	1713	S1	AGGACTTTCGCAATTG-1	Sample 1_nCoV 1 scRNA-seq [SW103]	GSM4509011	63	PBMC	M	COVID-19 patient	severe COVID-19 patient	1.42212	3317	1453	Platelets	Platelets	severe COVID-19 patient
toy	4806	1797	S1	AGGAGGTAGTGTACAA-1	Sample 1_nCoV 1 scRNA-seq [SW103]	GSM4509011	63	PBMC	M	COVID-19 patient	severe COVID-19 patient	6.05493	3051	1703	Classical monocytes	Monocytes	severe COVID-19 patient
toy	6781	1690	S1	AGGAGGTCAATGTCTG-1	Sample 1_nCoV 1 scRNA-seq [SW103]	GSM4509011	63	PBMC	M	COVID-19 patient	severe COVID-19 patient	5.81035	2687	1021	Th2 cells	CD4+ T cells	severe COVID-19 patient
toy	5850	1988	S1	AGGAGGTCACATTCTT-1	Sample 1_nCoV 1 scRNA-seq [SW103]	GSM4509011	63	PBMC	M	COVID-19 patient	severe COVID-19 patient	7.36752	3029	1635	Classical monocytes	Monocytes	severe COVID-19 patient
toy	3431	209	S1	AGGAGGTCAGTCCGTG-1	Sample 1_nCoV 1 scRNA-seq [SW103]	GSM4509011	63	PBMC	M	COVID-19 patient	severe COVID-19 patient	2.594	2747	192	Erythroblast	Erythroblast	severe COVID-19 patient
toy	4717	1442	S1	AGGAGGTGTTTGACAC-1	Sample 1_nCoV 1 scRNA-seq [SW103]	GSM4509011	63	PBMC	M	COVID-19 patient	severe COVID-19 patient	8.28917	2965	1365	Naive B cells	B cells	severe COVID-19 patient
toy	10925	2814	S1	AGGATAACATAACAGA-1	Sample 1_nCoV 1 scRNA-seq [SW103]	GSM4509011	63	PBMC	M	COVID-19 patient	severe COVID-19 patient	8.19222	2488	1045	Classical monocytes	Monocytes	severe COVID-19 patient
toy	803	448	S1	AGGATAACATGTGACT-1	Sample 1_nCoV 1 scRNA-seq [SW103]	GSM4509011	63	PBMC	M	COVID-19 patient	severe COVID-19 patient	13.076	2003	498	NA	NA	severe COVID-19 patient
toy	15276	3144	S1	AGGATAAGTGTCCACG-1	Sample 1_nCoV 1 scRNA-seq [SW103]	GSM4509011	63	PBMC	M	COVID-19 patient	severe COVID-19 patient	16.2608	2530	996	Classical monocytes	Monocytes	severe COVID-19 patient
toy	5534	1647	S1	AGGATAAGTTGTTGAC-1	Sample 1_nCoV 1 scRNA-seq [SW103]	GSM4509011	63	PBMC	M	COVID-19 patient	severe COVID-19 patient	9.30611	2960	1392	Non-Vd2 gd T cells	T cells	severe COVID-19 patient
toy	4688	1907	S1	AGGATAATCATGTCTT-1	Sample 1_nCoV 1 scRNA-seq [SW103]	GSM4509011	63	PBMC	M	COVID-19 patient	severe COVID-19 patient	9.44966	3097	1830	Natural killer cells	NK cells	severe COVID-19 patient
toy	1296	445	S1	AGGATAATCGACGAGA-1	Sample 1_nCoV 1 scRNA-seq [SW103]	GSM4509011	63	PBMC	M	COVID-19 patient	severe COVID-19 patient	7.25309	2099	497	Platelets	Platelets	severe COVID-19 patient
toy	7027	2271	S1	AGGATAATCGTCTACC-1	Sample 1_nCoV 1 scRNA-seq [SW103]	GSM4509011	63	PBMC	M	COVID-19 patient	severe COVID-19 patient	6.75964	2691	1319	Classical monocytes	Monocytes	severe COVID-19 patient
toy	8694	2731	S1	AGGATCTAGGTCTACT-1	Sample 1_nCoV 1 scRNA-seq [SW103]	GSM4509011	63	PBMC	M	COVID-19 patient	severe COVID-19 patient	6.69427	2431	1097	Intermediate monocytes	Monocytes	severe COVID-19 patient
toy	4186	1032	S1	AGGATCTGTGAAGCGT-1	Sample 1_nCoV 1 scRNA-seq [SW103]	GSM4509011	63	PBMC	M	COVID-19 patient	severe COVID-19 patient	12.9001	2772	1007	Non-switched memory B cells	B cells	severe COVID-19 patient
toy	1493	658	S1	AGGATCTTCCGGCAGT-1	Sample 1_nCoV 1 scRNA-seq [SW103]	GSM4509011	63	PBMC	M	COVID-19 patient	severe COVID-19 patient	7.50167	2051	684	Platelets	Platelets	severe COVID-19 patient
toy	10243	2813	S1	AGGATCTTCGGTGTAT-1	Sample 1_nCoV 1 scRNA-seq [SW103]	GSM4509011	63	PBMC	M	COVID-19 patient	severe COVID-19 patient	8.58147	2483	1083	Classical monocytes	Monocytes	severe COVID-19 patient
toy	8033	2458	S1	AGGCATTAGCAAGTCG-1	Sample 1_nCoV 1 scRNA-seq [SW103]	GSM4509011	63	PBMC	M	COVID-19 patient	severe COVID-19 patient	7.49409	2423	1057	Classical monocytes	Monocytes	severe COVID-19 patient
toy	9125	2584	S1	AGGCATTCAGATTAAG-1	Sample 1_nCoV 1 scRNA-seq [SW103]	GSM4509011	63	PBMC	M	COVID-19 patient	severe COVID-19 patient	8.05479	2462	1041	Classical monocytes	Monocytes	severe COVID-19 patient
toy	9531	2767	S1	AGGCATTCATACCGTA-1	Sample 1_nCoV 1 scRNA-seq [SW103]	GSM4509011	63	PBMC	M	COVID-19 patient	severe COVID-19 patient	4.30175	2534	1094	Effector memory CD8 T cells	CD8+ T cells	severe COVID-19 patient
toy	7809	2325	S1	AGGCATTGTCTCAAGT-1	Sample 1_nCoV 1 scRNA-seq [SW103]	GSM4509011	63	PBMC	M	COVID-19 patient	severe COVID-19 patient	5.37841	2358	945	NA	NA	severe COVID-19 patient
toy	13086	3110	S1	AGGCATTGTTGGAGAC-1	Sample 1_nCoV 1 scRNA-seq [SW103]	GSM4509011	63	PBMC	M	COVID-19 patient	severe COVID-19 patient	5.96057	2596	1146	Classical monocytes	Monocytes	severe COVID-19 patient
toy	25925	2816	S1	AGGCCACAGCTCTGTA-1	Sample 1_nCoV 1 scRNA-seq [SW103]	GSM4509011	63	PBMC	M	COVID-19 patient	severe COVID-19 patient	2.22179	3517	537	Erythroblast	Erythroblast	severe COVID-19 patient
toy	294	235	S1	AGGCCACAGGACTGGT-1	Sample 1_nCoV 1 scRNA-seq [SW103]	GSM4509011	63	PBMC	M	COVID-19 patient	severe COVID-19 patient	4.7619	1639	415	NA	NA	severe COVID-19 patient
toy	8470	2428	S1	AGGCCACCATCATTGG-1	Sample 1_nCoV 1 scRNA-seq [SW103]	GSM4509011	63	PBMC	M	COVID-19 patient	severe COVID-19 patient	11.0862	2403	912	Exhausted B cells	B cells	severe COVID-19 patient
toy	6337	1897	S1	AGGCCACTCATCCTGC-1	Sample 1_nCoV 1 scRNA-seq [SW103]	GSM4509011	63	PBMC	M	COVID-19 patient	severe COVID-19 patient	4.51318	2897	1361	Follicular helper T cells	CD4+ T cells	severe COVID-19 patient
toy	327	212	S1	AGGCTGCAGTTTAGGA-1	Sample 1_nCoV 1 scRNA-seq [SW103]	GSM4509011	63	PBMC	M	COVID-19 patient	severe COVID-19 patient	6.72783	1652	390	NA	NA	severe COVID-19 patient
toy	2020	778	S1	AGGCTGCCACCGTCGA-1	Sample 1_nCoV 1 scRNA-seq [SW103]	GSM4509011	63	PBMC	M	COVID-19 patient	severe COVID-19 patient	5.69307	2275	775	Naive B cells	B cells	severe COVID-19 patient
toy	316	250	S1	AGGCTGCTCGCCGATG-1	Sample 1_nCoV 1 scRNA-seq [SW103]	GSM4509011	63	PBMC	M	COVID-19 patient	severe COVID-19 patient	7.27848	1653	411	NA	NA	severe COVID-19 patient
toy	11743	3141	S1	AGGGAGTGTCGCATTA-1	Sample 1_nCoV 1 scRNA-seq [SW103]	GSM4509011	63	PBMC	M	COVID-19 patient	severe COVID-19 patient	6.0717	2540	1181	Classical monocytes	Monocytes	severe COVID-19 patient
toy	612	355	S1	AGGGAGTGTCGCCTAG-1	Sample 1_nCoV 1 scRNA-seq [SW103]	GSM4509011	63	PBMC	M	COVID-19 patient	severe COVID-19 patient	3.26797	1736	488	Platelets	Platelets	severe COVID-19 patient
toy	4402	1428	S1	AGGGAGTGTTATAGAG-1	Sample 1_nCoV 1 scRNA-seq [SW103]	GSM4509011	63	PBMC	M	COVID-19 patient	severe COVID-19 patient	8.85961	2912	1385	Natural killer cells	NK cells	severe COVID-19 patient
toy	3977	1483	S1	AGGGAGTGTTGATCGT-1	Sample 1_nCoV 1 scRNA-seq [SW103]	GSM4509011	63	PBMC	M	COVID-19 patient	severe COVID-19 patient	9.37893	2849	1474	Classical monocytes	Monocytes	severe COVID-19 patient
toy	513	301	S1	AGGGCCTAGCGGGTAT-1	Sample 1_nCoV 1 scRNA-seq [SW103]	GSM4509011	63	PBMC	M	COVID-19 patient	severe COVID-19 patient	9.94152	1739	446	HSC_-G-CSF	HSC_-G-CSF	severe COVID-19 patient
toy	9151	2696	S1	AGGGCCTCACACCTTC-1	Sample 1_nCoV 1 scRNA-seq [SW103]	GSM4509011	63	PBMC	M	COVID-19 patient	severe COVID-19 patient	7.52923	2441	1083	Classical monocytes	Monocytes	severe COVID-19 patient
toy	28882	4548	S1	AGGGCCTCATCAGCGC-1	Sample 1_nCoV 1 scRNA-seq [SW103]	GSM4509011	63	PBMC	M	COVID-19 patient	severe COVID-19 patient	6.34998	2483	1004	Myeloid dendritic cells	Dendritic cells	severe COVID-19 patient
toy	5485	1588	S1	AGGGCCTGTCAGTCGC-1	Sample 1_nCoV 1 scRNA-seq [SW103]	GSM4509011	63	PBMC	M	COVID-19 patient	severe COVID-19 patient	4.72197	2986	1368	Th1/Th17 cells	CD4+ T cells	severe COVID-19 patient
toy	5462	1542	S1	AGGGCCTGTCCGGATC-1	Sample 1_nCoV 1 scRNA-seq [SW103]	GSM4509011	63	PBMC	M	COVID-19 patient	severe COVID-19 patient	6.3896	2956	1322	Naive B cells	B cells	severe COVID-19 patient
toy	1582	793	S1	AGGGCCTTCATCGTAG-1	Sample 1_nCoV 1 scRNA-seq [SW103]	GSM4509011	63	PBMC	M	COVID-19 patient	severe COVID-19 patient	11.4412	2099	793	Classical monocytes	Monocytes	severe COVID-19 patient
toy	11583	3244	S1	AGGGCCTTCATTCATC-1	Sample 1_nCoV 1 scRNA-seq [SW103]	GSM4509011	63	PBMC	M	COVID-19 patient	severe COVID-19 patient	5.62031	2490	1174	Myeloid dendritic cells	Monocytes	severe COVID-19 patient
toy	1974	941	S1	AGGGCTCAGGAGTATT-1	Sample 1_nCoV 1 scRNA-seq [SW103]	GSM4509011	63	PBMC	M	COVID-19 patient	severe COVID-19 patient	16.7173	2208	940	Classical monocytes	Monocytes	severe COVID-19 patient
toy	9420	2354	S1	AGGGCTCAGGATACCG-1	Sample 1_nCoV 1 scRNA-seq [SW103]	GSM4509011	63	PBMC	M	COVID-19 patient	severe COVID-19 patient	6.87898	2345	740	Th2 cells	CD4+ T cells	severe COVID-19 patient
toy	9978	2194	S1	AGGGCTCAGTACAGAT-1	Sample 1_nCoV 1 scRNA-seq [SW103]	GSM4509011	63	PBMC	M	COVID-19 patient	severe COVID-19 patient	4.36961	2359	661	Th2 cells	CD4+ T cells	severe COVID-19 patient
toy	13910	3438	S1	AGGGCTCCACCGCTGA-1	Sample 1_nCoV 1 scRNA-seq [SW103]	GSM4509011	63	PBMC	M	COVID-19 patient	severe COVID-19 patient	6.00288	2622	1269	Classical monocytes	Monocytes	severe COVID-19 patient
toy	4247	1584	S1	AGGGCTCCAGCTCGGT-1	Sample 1_nCoV 1 scRNA-seq [SW103]	GSM4509011	63	PBMC	M	COVID-19 patient	severe COVID-19 patient	10.4544	2895	1553	Classical monocytes	Monocytes	severe COVID-19 patient
toy	13429	3202	S1	AGGGCTCTCCGGACGT-1	Sample 1_nCoV 1 scRNA-seq [SW103]	GSM4509011	63	PBMC	M	COVID-19 patient	severe COVID-19 patient	5.87534	2628	1231	Classical monocytes	Monocytes	severe COVID-19 patient
toy	841	381	S1	AGGGTCCAGAGTGACC-1	Sample 1_nCoV 1 scRNA-seq [SW103]	GSM4509011	63	PBMC	M	COVID-19 patient	severe COVID-19 patient	16.8847	2013	474	Platelets	Platelets	severe COVID-19 patient
toy	7698	2140	S1	AGGGTCCCATGACCCG-1	Sample 1_nCoV 1 scRNA-seq [SW103]	GSM4509011	63	PBMC	M	COVID-19 patient	severe COVID-19 patient	6.81995	2468	922	Exhausted B cells	B cells	severe COVID-19 patient
toy	606	282	S1	AGGGTCCGTGCTTCAA-1	Sample 1_nCoV 1 scRNA-seq [SW103]	GSM4509011	63	PBMC	M	COVID-19 patient	severe COVID-19 patient	10.231	1870	409	HSC_-G-CSF	HSC_-G-CSF	severe COVID-19 patient
toy	5628	1472	S1	AGGGTCCTCCCTCTCC-1	Sample 1_nCoV 1 scRNA-seq [SW103]	GSM4509011	63	PBMC	M	COVID-19 patient	severe COVID-19 patient	8.90192	2929	1220	Naive B cells	B cells	severe COVID-19 patient
toy	600	277	S1	AGGGTGAAGACCAGAC-1	Sample 1_nCoV 1 scRNA-seq [SW103]	GSM4509011	63	PBMC	M	COVID-19 patient	severe COVID-19 patient	12.5	1848	409	Platelets	Platelets	severe COVID-19 patient
toy	24320	4212	S1	AGGGTGAAGCAGAAAG-1	Sample 1_nCoV 1 scRNA-seq [SW103]	GSM4509011	63	PBMC	M	COVID-19 patient	severe COVID-19 patient	7.53701	2692	1125	Effector memory CD8 T cells	T cells	severe COVID-19 patient
toy	18120	4140	S1	AGGGTGACAGCACAAG-1	Sample 1_nCoV 1 scRNA-seq [SW103]	GSM4509011	63	PBMC	M	COVID-19 patient	severe COVID-19 patient	7.39514	2554	1251	Classical monocytes	Monocytes	severe COVID-19 patient
toy	9474	2635	S1	AGGGTGAGTAGTCTTG-1	Sample 1_nCoV 1 scRNA-seq [SW103]	GSM4509011	63	PBMC	M	COVID-19 patient	severe COVID-19 patient	6.14313	2437	1023	Classical monocytes	Monocytes	severe COVID-19 patient
toy	5817	1864	S1	AGGGTGAGTCTCGCGA-1	Sample 1_nCoV 1 scRNA-seq [SW103]	GSM4509011	63	PBMC	M	COVID-19 patient	severe COVID-19 patient	10.6068	2999	1506	Terminal effector CD8 T cells	T cells	severe COVID-19 patient
toy	10656	2050	S1	AGGGTGATCGCAAGAG-1	Sample 1_nCoV 1 scRNA-seq [SW103]	GSM4509011	63	PBMC	M	COVID-19 patient	severe COVID-19 patient	5.03003	2379	601	Th17 cells	CD4+ T cells	severe COVID-19 patient
toy	9030	2652	S1	AGGGTTTAGCGACTAG-1	Sample 1_nCoV 1 scRNA-seq [SW103]	GSM4509011	63	PBMC	M	COVID-19 patient	severe COVID-19 patient	7.72979	2354	975	Classical monocytes	Monocytes	severe COVID-19 patient
toy	4581	1591	S1	AGGGTTTCACTGTGTA-1	Sample 1_nCoV 1 scRNA-seq [SW103]	GSM4509011	63	PBMC	M	COVID-19 patient	severe COVID-19 patient	7.98952	3006	1539	Natural killer cells	NK cells	severe COVID-19 patient
toy	4861	1656	S1	AGGGTTTGTCAATGGG-1	Sample 1_nCoV 1 scRNA-seq [SW103]	GSM4509011	63	PBMC	M	COVID-19 patient	severe COVID-19 patient	5.45155	2973	1553	Classical monocytes	Monocytes	severe COVID-19 patient
toy	6915	1924	S1	AGGGTTTGTTCGTAAC-1	Sample 1_nCoV 1 scRNA-seq [SW103]	GSM4509011	63	PBMC	M	COVID-19 patient	severe COVID-19 patient	13.5936	2751	1152	Exhausted B cells	B cells	severe COVID-19 patient
toy	575	369	S1	AGGGTTTTCGGTTGTA-1	Sample 1_nCoV 1 scRNA-seq [SW103]	GSM4509011	63	PBMC	M	COVID-19 patient	severe COVID-19 patient	16.3478	1846	468	NA	NA	severe COVID-19 patient
toy	2321	766	S1	AGGTAGGAGACGCCCT-1	Sample 1_nCoV 1 scRNA-seq [SW103]	GSM4509011	63	PBMC	M	COVID-19 patient	severe COVID-19 patient	2.54201	2362	766	Platelets	Platelets	severe COVID-19 patient
toy	13553	2845	S1	AGGTAGGAGAGGTTAT-1	Sample 1_nCoV 1 scRNA-seq [SW103]	GSM4509011	63	PBMC	M	COVID-19 patient	severe COVID-19 patient	9.23781	2544	932	Non-switched memory B cells	B cells	severe COVID-19 patient
toy	12074	2538	S1	AGGTAGGGTTATTCTC-1	Sample 1_nCoV 1 scRNA-seq [SW103]	GSM4509011	63	PBMC	M	COVID-19 patient	severe COVID-19 patient	9.49975	2458	788	Non-switched memory B cells	B cells	severe COVID-19 patient
toy	11224	2474	S1	AGGTAGGTCATCTACT-1	Sample 1_nCoV 1 scRNA-seq [SW103]	GSM4509011	63	PBMC	M	COVID-19 patient	severe COVID-19 patient	4.78439	2411	762	Central memory CD8 T cells	CD4+ T cells	severe COVID-19 patient
toy	1396	656	S1	AGGTAGGTCGTTGTTT-1	Sample 1_nCoV 1 scRNA-seq [SW103]	GSM4509011	63	PBMC	M	COVID-19 patient	severe COVID-19 patient	1.86246	2006	709	Platelets	Platelets	severe COVID-19 patient
toy	4472	221	S1	AGGTAGGTCTTGATTC-1	Sample 1_nCoV 1 scRNA-seq [SW103]	GSM4509011	63	PBMC	M	COVID-19 patient	severe COVID-19 patient	4.87478	2946	177	Naive B cells	NA	severe COVID-19 patient
toy	8406	2421	S1	AGGTCATGTACGAAAT-1	Sample 1_nCoV 1 scRNA-seq [SW103]	GSM4509011	63	PBMC	M	COVID-19 patient	severe COVID-19 patient	6.97121	2380	973	Classical monocytes	Monocytes	severe COVID-19 patient
toy	4827	1449	S1	AGGTCATTCCGGCTTT-1	Sample 1_nCoV 1 scRNA-seq [SW103]	GSM4509011	63	PBMC	M	COVID-19 patient	severe COVID-19 patient	7.31303	2948	1356	Naive B cells	B cells	severe COVID-19 patient
toy	8809	1956	S1	AGGTCTAAGACTGAGC-1	Sample 1_nCoV 1 scRNA-seq [SW103]	GSM4509011	63	PBMC	M	COVID-19 patient	severe COVID-19 patient	3.76887	2417	730	Th1/Th17 cells	CD4+ T cells	severe COVID-19 patient
toy	989	201	S1	AGGTCTAGTGCGTTTA-1	Sample 1_nCoV 1 scRNA-seq [SW103]	GSM4509011	63	PBMC	M	COVID-19 patient	severe COVID-19 patient	5.86451	1960	284	Non-switched memory B cells	NA	severe COVID-19 patient
toy	564	275	S1	AGGTGTTAGTTTGTCG-1	Sample 1_nCoV 1 scRNA-seq [SW103]	GSM4509011	63	PBMC	M	COVID-19 patient	severe COVID-19 patient	9.75177	1845	401	Progenitor cells	NA	severe COVID-19 patient
toy	9975	2887	S1	AGGTGTTCAGCCGTTG-1	Sample 1_nCoV 1 scRNA-seq [SW103]	GSM4509011	63	PBMC	M	COVID-19 patient	severe COVID-19 patient	7.25815	2463	1135	Classical monocytes	Monocytes	severe COVID-19 patient
toy	5691	1446	S1	AGGTGTTTCTAGTTCT-1	Sample 1_nCoV 1 scRNA-seq [SW103]	GSM4509011	63	PBMC	M	COVID-19 patient	severe COVID-19 patient	4.77948	2904	1196	Non-switched memory B cells	B cells	severe COVID-19 patient
toy	4762	243	S1	AGGTTACAGCTGAAAT-1	Sample 1_nCoV 1 scRNA-seq [SW103]	GSM4509011	63	PBMC	M	COVID-19 patient	severe COVID-19 patient	0.335993	3020	184	Erythroblast	Erythroblast	severe COVID-19 patient
toy	4577	1484	S1	AGGTTACGTCGAACAG-1	Sample 1_nCoV 1 scRNA-seq [SW103]	GSM4509011	63	PBMC	M	COVID-19 patient	severe COVID-19 patient	5.65873	2939	1436	Central memory CD8 T cells	CD4+ T cells	severe COVID-19 patient
toy	2541	1204	S1	AGGTTGTGTGAGTTTC-1	Sample 1_nCoV 1 scRNA-seq [SW103]	GSM4509011	63	PBMC	M	COVID-19 patient	severe COVID-19 patient	8.46124	2520	1204	Classical monocytes	Monocytes	severe COVID-19 patient
toy	9576	2719	S1	AGGTTGTTCTGGCCTT-1	Sample 1_nCoV 1 scRNA-seq [SW103]	GSM4509011	63	PBMC	M	COVID-19 patient	severe COVID-19 patient	10.9127	2434	1038	Classical monocytes	Monocytes	severe COVID-19 patient
toy	9655	2749	S1	AGTAACCAGAAACTGT-1	Sample 1_nCoV 1 scRNA-seq [SW103]	GSM4509011	63	PBMC	M	COVID-19 patient	severe COVID-19 patient	9.13516	2437	1042	Classical monocytes	Monocytes	severe COVID-19 patient
toy	505	206	S1	AGTAACCCAAACGAGC-1	Sample 1_nCoV 1 scRNA-seq [SW103]	GSM4509011	63	PBMC	M	COVID-19 patient	severe COVID-19 patient	11.4851	1902	344	HSC_-G-CSF	HSC_-G-CSF	severe COVID-19 patient
toy	14314	3384	S1	AGTAACCCACTACAGT-1	Sample 1_nCoV 1 scRNA-seq [SW103]	GSM4509011	63	PBMC	M	COVID-19 patient	severe COVID-19 patient	6.33645	2548	1146	Classical monocytes	Monocytes	severe COVID-19 patient
toy	1227	327	S1	AGTAACCCAGCGACCT-1	Sample 1_nCoV 1 scRNA-seq [SW103]	GSM4509011	63	PBMC	M	COVID-19 patient	severe COVID-19 patient	3.09698	2089	386	Platelets	Platelets	severe COVID-19 patient
toy	5357	1767	S1	AGTAACCCATGAGAAT-1	Sample 1_nCoV 1 scRNA-seq [SW103]	GSM4509011	63	PBMC	M	COVID-19 patient	severe COVID-19 patient	8.88557	3013	1562	Classical monocytes	Monocytes	severe COVID-19 patient
toy	7556	2296	S1	AGTAACCGTAAGTAGT-1	Sample 1_nCoV 1 scRNA-seq [SW103]	GSM4509011	63	PBMC	M	COVID-19 patient	severe COVID-19 patient	7.26575	2464	1048	Classical monocytes	Monocytes	severe COVID-19 patient
toy	3357	1110	S1	AGTAACCGTTCGGCCA-1	Sample 1_nCoV 1 scRNA-seq [SW103]	GSM4509011	63	PBMC	M	COVID-19 patient	severe COVID-19 patient	11.8558	2749	1109	Naive B cells	B cells	severe COVID-19 patient
toy	6711	1794	S1	AGTAACCGTTGCTAGT-1	Sample 1_nCoV 1 scRNA-seq [SW103]	GSM4509011	63	PBMC	M	COVID-19 patient	severe COVID-19 patient	4.20206	2745	1134	T regulatory cells	CD4+ T cells	severe COVID-19 patient
toy	531	255	S1	AGTAACCTCCCTATTA-1	Sample 1_nCoV 1 scRNA-seq [SW103]	GSM4509011	63	PBMC	M	COVID-19 patient	severe COVID-19 patient	5.08475	1821	391	HSC_-G-CSF	HSC_-G-CSF	severe COVID-19 patient
toy	5758	2030	S1	AGTAACCTCGACGCGT-1	Sample 1_nCoV 1 scRNA-seq [SW103]	GSM4509011	63	PBMC	M	COVID-19 patient	severe COVID-19 patient	6.37374	3065	1710	Classical monocytes	Monocytes	severe COVID-19 patient
toy	1677	625	S1	AGTACCAGTAGCACAG-1	Sample 1_nCoV 1 scRNA-seq [SW103]	GSM4509011	63	PBMC	M	COVID-19 patient	severe COVID-19 patient	3.22004	2119	624	Platelets	Platelets	severe COVID-19 patient
toy	496	268	S1	AGTACCAGTCGTACTA-1	Sample 1_nCoV 1 scRNA-seq [SW103]	GSM4509011	63	PBMC	M	COVID-19 patient	severe COVID-19 patient	12.7016	1790	426	Progenitor cells	NA	severe COVID-19 patient
toy	5313	1727	S1	AGTACTGAGCCTATTG-1	Sample 1_nCoV 1 scRNA-seq [SW103]	GSM4509011	63	PBMC	M	COVID-19 patient	severe COVID-19 patient	7.39695	3038	1542	Terminal effector CD4 T cells	T cells	severe COVID-19 patient
toy	2130	986	S1	AGTACTGCACAGCCAC-1	Sample 1_nCoV 1 scRNA-seq [SW103]	GSM4509011	63	PBMC	M	COVID-19 patient	severe COVID-19 patient	7.79343	2272	984	Terminal effector CD4 T cells	NK cells	severe COVID-19 patient
toy	8710	2193	S1	AGTAGCTAGCAGAAAG-1	Sample 1_nCoV 1 scRNA-seq [SW103]	GSM4509011	63	PBMC	M	COVID-19 patient	severe COVID-19 patient	9.73594	2381	781	Non-switched memory B cells	B cells	severe COVID-19 patient
toy	990	534	S1	AGTAGCTAGTTGAAAC-1	Sample 1_nCoV 1 scRNA-seq [SW103]	GSM4509011	63	PBMC	M	COVID-19 patient	severe COVID-19 patient	12.3232	2141	568	Classical monocytes	Monocytes	severe COVID-19 patient
toy	2896	606	S1	AGTAGTCCAACACGAG-1	Sample 1_nCoV 1 scRNA-seq [SW103]	GSM4509011	63	PBMC	M	COVID-19 patient	severe COVID-19 patient	3.41851	2639	605	Platelets	Platelets	severe COVID-19 patient
toy	11044	2914	S1	AGTAGTCCACAATGAA-1	Sample 1_nCoV 1 scRNA-seq [SW103]	GSM4509011	63	PBMC	M	COVID-19 patient	severe COVID-19 patient	8.14922	2510	1100	Classical monocytes	Monocytes	severe COVID-19 patient
toy	684	299	S1	AGTAGTCGTTTGAACC-1	Sample 1_nCoV 1 scRNA-seq [SW103]	GSM4509011	63	PBMC	M	COVID-19 patient	severe COVID-19 patient	14.6199	1931	414	NA	NA	severe COVID-19 patient
toy	7417	1833	S1	AGTCAACCAAGCTGCC-1	Sample 1_nCoV 1 scRNA-seq [SW103]	GSM4509011	63	PBMC	M	COVID-19 patient	severe COVID-19 patient	6.41769	2501	848	Naive B cells	B cells	severe COVID-19 patient
toy	9931	2363	S1	AGTCAACTCATTGAGC-1	Sample 1_nCoV 1 scRNA-seq [SW103]	GSM4509011	63	PBMC	M	COVID-19 patient	severe COVID-19 patient	5.62884	2386	780	Th2 cells	CD4+ T cells	severe COVID-19 patient
toy	2511	891	S1	AGTCAACTCCTCGCAT-1	Sample 1_nCoV 1 scRNA-seq [SW103]	GSM4509011	63	PBMC	M	COVID-19 patient	severe COVID-19 patient	4.42055	2500	890	Platelets	Platelets	severe COVID-19 patient
toy	4935	1590	S1	AGTCACAAGACAAGCC-1	Sample 1_nCoV 1 scRNA-seq [SW103]	GSM4509011	63	PBMC	M	COVID-19 patient	severe COVID-19 patient	6.52482	3002	1485	Non-Vd2 gd T cells	T cells	severe COVID-19 patient
toy	1726	633	S1	AGTCACACAATAGAGT-1	Sample 1_nCoV 1 scRNA-seq [SW103]	GSM4509011	63	PBMC	M	COVID-19 patient	severe COVID-19 patient	5.67787	2149	634	Platelets	Platelets	severe COVID-19 patient
toy	1837	675	S1	AGTCACAGTGCTCTCT-1	Sample 1_nCoV 1 scRNA-seq [SW103]	GSM4509011	63	PBMC	M	COVID-19 patient	severe COVID-19 patient	7.34894	2193	674	Platelets	Platelets	severe COVID-19 patient
toy	8186	2618	S1	AGTCATGAGCTAGATA-1	Sample 1_nCoV 1 scRNA-seq [SW103]	GSM4509011	63	PBMC	M	COVID-19 patient	severe COVID-19 patient	11.0432	2391	1077	Classical monocytes	Monocytes	severe COVID-19 patient
toy	12881	3247	S1	AGTCATGAGTCCTGTA-1	Sample 1_nCoV 1 scRNA-seq [SW103]	GSM4509011	63	PBMC	M	COVID-19 patient	severe COVID-19 patient	6.18741	2571	1177	Non classical monocytes	Monocytes	severe COVID-19 patient
toy	10928	2200	S1	AGTCATGTCCAAATGC-1	Sample 1_nCoV 1 scRNA-seq [SW103]	GSM4509011	63	PBMC	M	COVID-19 patient	severe COVID-19 patient	4.63946	2398	686	Th2 cells	CD8+ T cells	severe COVID-19 patient
toy	4850	1778	S1	AGTCATGTCCTGTTGC-1	Sample 1_nCoV 1 scRNA-seq [SW103]	GSM4509011	63	PBMC	M	COVID-19 patient	severe COVID-19 patient	7.03093	3055	1668	Natural killer cells	NK cells	severe COVID-19 patient
toy	11498	2877	S1	AGTCATGTCGCCAATA-1	Sample 1_nCoV 1 scRNA-seq [SW103]	GSM4509011	63	PBMC	M	COVID-19 patient	severe COVID-19 patient	4.8965	2552	1118	Classical monocytes	Monocytes	severe COVID-19 patient
toy	3310	1331	S1	AGTCTCCAGTAGAGTT-1	Sample 1_nCoV 1 scRNA-seq [SW103]	GSM4509011	63	PBMC	M	COVID-19 patient	severe COVID-19 patient	12.4169	2783	1331	Classical monocytes	Monocytes	severe COVID-19 patient
toy	4274	1536	S1	AGTCTCCAGTTGGAAT-1	Sample 1_nCoV 1 scRNA-seq [SW103]	GSM4509011	63	PBMC	M	COVID-19 patient	severe COVID-19 patient	5.70894	2897	1512	Classical monocytes	Monocytes	severe COVID-19 patient
toy	1141	460	S1	AGTCTCCCATGTTCGA-1	Sample 1_nCoV 1 scRNA-seq [SW103]	GSM4509011	63	PBMC	M	COVID-19 patient	severe COVID-19 patient	6.48554	2203	510	Platelets	Platelets	severe COVID-19 patient
toy	752	480	S1	AGTCTCCGTTTACCTT-1	Sample 1_nCoV 1 scRNA-seq [SW103]	GSM4509011	63	PBMC	M	COVID-19 patient	severe COVID-19 patient	4.92021	1924	549	NA	NA	severe COVID-19 patient
toy	6270	2079	S1	AGTGACTAGGCATCTT-1	Sample 1_nCoV 1 scRNA-seq [SW103]	GSM4509011	63	PBMC	M	COVID-19 patient	severe COVID-19 patient	4.19458	2910	1518	Classical monocytes	Monocytes	severe COVID-19 patient
toy	3538	1491	S1	AGTGACTCAAGGAGTC-1	Sample 1_nCoV 1 scRNA-seq [SW103]	GSM4509011	63	PBMC	M	COVID-19 patient	severe COVID-19 patient	1.24364	2962	1472	Platelets	Platelets	severe COVID-19 patient
toy	7530	2155	S1	AGTGACTGTAGACTGG-1	Sample 1_nCoV 1 scRNA-seq [SW103]	GSM4509011	63	PBMC	M	COVID-19 patient	severe COVID-19 patient	8.43293	2467	944	Vd2 gd T cells	T cells	severe COVID-19 patient
toy	6376	1799	S1	AGTGACTGTGGAAATT-1	Sample 1_nCoV 1 scRNA-seq [SW103]	GSM4509011	63	PBMC	M	COVID-19 patient	severe COVID-19 patient	15.7152	2856	1263	Classical monocytes	Monocytes	severe COVID-19 patient
toy	2449	973	S1	AGTGACTTCGACATAC-1	Sample 1_nCoV 1 scRNA-seq [SW103]	GSM4509011	63	PBMC	M	COVID-19 patient	severe COVID-19 patient	10.4532	2447	971	Non-Vd2 gd T cells	T cells	severe COVID-19 patient
toy	2533	975	S1	AGTGACTTCTCGCTTG-1	Sample 1_nCoV 1 scRNA-seq [SW103]	GSM4509011	63	PBMC	M	COVID-19 patient	severe COVID-19 patient	13.0675	2500	974	Naive CD8 T cells	CD4+ T cells	severe COVID-19 patient
toy	16415	3613	S1	AGTGATCAGCGGTAGT-1	Sample 1_nCoV 1 scRNA-seq [SW103]	GSM4509011	63	PBMC	M	COVID-19 patient	severe COVID-19 patient	6.67682	2649	1177	Intermediate monocytes	Monocytes	severe COVID-19 patient
toy	5399	1547	S1	AGTGATCAGGGCTAAC-1	Sample 1_nCoV 1 scRNA-seq [SW103]	GSM4509011	63	PBMC	M	COVID-19 patient	severe COVID-19 patient	5.53806	2975	1346	Non-switched memory B cells	B cells	severe COVID-19 patient
toy	989	292	S1	AGTGATCAGTTCATCG-1	Sample 1_nCoV 1 scRNA-seq [SW103]	GSM4509011	63	PBMC	M	COVID-19 patient	severe COVID-19 patient	7.38119	1998	395	Erythroblast	Erythroblast	severe COVID-19 patient
toy	18803	2645	S1	AGTGATCCAAGTGGTG-1	Sample 1_nCoV 1 scRNA-seq [SW103]	GSM4509011	63	PBMC	M	COVID-19 patient	severe COVID-19 patient	12.6682	2875	1052	MEP	MEP	severe COVID-19 patient
toy	2605	1150	S1	AGTGATCTCACGGGAA-1	Sample 1_nCoV 1 scRNA-seq [SW103]	GSM4509011	63	PBMC	M	COVID-19 patient	severe COVID-19 patient	9.0595	2554	1150	Classical monocytes	Monocytes	severe COVID-19 patient
toy	7915	2450	S1	AGTGATCTCTTGCGCT-1	Sample 1_nCoV 1 scRNA-seq [SW103]	GSM4509011	63	PBMC	M	COVID-19 patient	severe COVID-19 patient	9.7031	2373	998	Intermediate monocytes	NA	severe COVID-19 patient
toy	6651	1916	S1	AGTGCCGAGCTCCACG-1	Sample 1_nCoV 1 scRNA-seq [SW103]	GSM4509011	63	PBMC	M	COVID-19 patient	severe COVID-19 patient	8.41979	2838	1251	Natural killer cells	NK cells	severe COVID-19 patient
toy	5176	1616	S1	AGTGCCGAGTAAATGC-1	Sample 1_nCoV 1 scRNA-seq [SW103]	GSM4509011	63	PBMC	M	COVID-19 patient	severe COVID-19 patient	12.5193	2989	1441	Vd2 gd T cells	T cells	severe COVID-19 patient
toy	5816	1633	S1	AGTGCCGCATCCTTGC-1	Sample 1_nCoV 1 scRNA-seq [SW103]	GSM4509011	63	PBMC	M	COVID-19 patient	severe COVID-19 patient	8.33906	2928	1296	Non-Vd2 gd T cells	T cells	severe COVID-19 patient
toy	472	256	S1	AGTGCCGGTTGGTAGG-1	Sample 1_nCoV 1 scRNA-seq [SW103]	GSM4509011	63	PBMC	M	COVID-19 patient	severe COVID-19 patient	10.3814	1851	400	HSC_-G-CSF	HSC_-G-CSF	severe COVID-19 patient
toy	4786	258	S1	AGTGCCGTCGGAATGG-1	Sample 1_nCoV 1 scRNA-seq [SW103]	GSM4509011	63	PBMC	M	COVID-19 patient	severe COVID-19 patient	0.940242	3022	195	Erythroblast	Erythroblast	severe COVID-19 patient
toy	4880	1707	S1	AGTGTTGAGGAAGTGA-1	Sample 1_nCoV 1 scRNA-seq [SW103]	GSM4509011	63	PBMC	M	COVID-19 patient	severe COVID-19 patient	10.7787	3017	1610	Classical monocytes	Monocytes	severe COVID-19 patient
toy	4649	1539	S1	AGTGTTGGTAGACTGG-1	Sample 1_nCoV 1 scRNA-seq [SW103]	GSM4509011	63	PBMC	M	COVID-19 patient	severe COVID-19 patient	10.712	2968	1486	Effector memory CD8 T cells	T cells	severe COVID-19 patient
toy	4145	1264	S1	AGTGTTGGTGCAACAG-1	Sample 1_nCoV 1 scRNA-seq [SW103]	GSM4509011	63	PBMC	M	COVID-19 patient	severe COVID-19 patient	9.16767	2841	1240	Naive B cells	B cells	severe COVID-19 patient
toy	396	269	S1	AGTGTTGGTTGGATCT-1	Sample 1_nCoV 1 scRNA-seq [SW103]	GSM4509011	63	PBMC	M	COVID-19 patient	severe COVID-19 patient	8.08081	1797	402	Plasmablasts	B cells	severe COVID-19 patient
toy	5062	1703	S1	AGTGTTGTCCGGTAGC-1	Sample 1_nCoV 1 scRNA-seq [SW103]	GSM4509011	63	PBMC	M	COVID-19 patient	severe COVID-19 patient	9.97629	3037	1569	Classical monocytes	Monocytes	severe COVID-19 patient
toy	17110	3649	S1	AGTTAGCAGATCCCGC-1	Sample 1_nCoV 1 scRNA-seq [SW103]	GSM4509011	63	PBMC	M	COVID-19 patient	severe COVID-19 patient	9.2519	2521	1097	Classical monocytes	Monocytes	severe COVID-19 patient
toy	5711	1542	S1	AGTTAGCCACTCAAGT-1	Sample 1_nCoV 1 scRNA-seq [SW103]	GSM4509011	63	PBMC	M	COVID-19 patient	severe COVID-19 patient	7.00403	2936	1285	Th1/Th17 cells	CD4+ T cells	severe COVID-19 patient
toy	2760	1211	S1	AGTTAGCCAGCATCTA-1	Sample 1_nCoV 1 scRNA-seq [SW103]	GSM4509011	63	PBMC	M	COVID-19 patient	severe COVID-19 patient	14.4203	2613	1209	Naive B cells	B cells	severe COVID-19 patient
toy	812	313	S1	AGTTAGCGTATTCCTT-1	Sample 1_nCoV 1 scRNA-seq [SW103]	GSM4509011	63	PBMC	M	COVID-19 patient	severe COVID-19 patient	7.0197	2079	365	HSC_-G-CSF	HSC_-G-CSF	severe COVID-19 patient
toy	6270	2153	S1	AGTTAGCGTCAGGTAG-1	Sample 1_nCoV 1 scRNA-seq [SW103]	GSM4509011	63	PBMC	M	COVID-19 patient	severe COVID-19 patient	10.9569	3019	1618	Effector memory CD8 T cells	T cells	severe COVID-19 patient
toy	6492	1755	S1	AGTTAGCGTGGCCACT-1	Sample 1_nCoV 1 scRNA-seq [SW103]	GSM4509011	63	PBMC	M	COVID-19 patient	severe COVID-19 patient	4.34381	2821	1191	Switched memory B cells	B cells	severe COVID-19 patient
toy	3161	1166	S1	AGTTCCCAGAGGTTTA-1	Sample 1_nCoV 1 scRNA-seq [SW103]	GSM4509011	63	PBMC	M	COVID-19 patient	severe COVID-19 patient	9.01613	2719	1166	Th17 cells	CD8+ T cells	severe COVID-19 patient
toy	665	273	S1	AGTTCCCAGCCGCACT-1	Sample 1_nCoV 1 scRNA-seq [SW103]	GSM4509011	63	PBMC	M	COVID-19 patient	severe COVID-19 patient	6.76692	1922	393	HSC_-G-CSF	HSC_-G-CSF	severe COVID-19 patient
toy	14710	3404	S1	AGTTCCCAGCCTCGTG-1	Sample 1_nCoV 1 scRNA-seq [SW103]	GSM4509011	63	PBMC	M	COVID-19 patient	severe COVID-19 patient	6.00272	2575	1141	Classical monocytes	Monocytes	severe COVID-19 patient
toy	8084	1844	S1	AGTTCCCGTTGTCTAG-1	Sample 1_nCoV 1 scRNA-seq [SW103]	GSM4509011	63	PBMC	M	COVID-19 patient	severe COVID-19 patient	4.82434	2397	685	Th2 cells	CD4+ T cells	severe COVID-19 patient
toy	5380	1321	S1	AGTTCGAAGACGCCCT-1	Sample 1_nCoV 1 scRNA-seq [SW103]	GSM4509011	63	PBMC	M	COVID-19 patient	severe COVID-19 patient	6.41264	2884	1134	Naive B cells	B cells	severe COVID-19 patient
toy	920	333	S1	AGTTCGAAGATTGCGG-1	Sample 1_nCoV 1 scRNA-seq [SW103]	GSM4509011	63	PBMC	M	COVID-19 patient	severe COVID-19 patient	12.5	2065	425	Platelets	Platelets	severe COVID-19 patient
toy	7290	2238	S1	AGTTCGAAGCATGCGA-1	Sample 1_nCoV 1 scRNA-seq [SW103]	GSM4509011	63	PBMC	M	COVID-19 patient	severe COVID-19 patient	14.0878	2550	1140	Classical monocytes	Monocytes	severe COVID-19 patient
toy	4703	1726	S1	AGTTCGAAGGAGAGGC-1	Sample 1_nCoV 1 scRNA-seq [SW103]	GSM4509011	63	PBMC	M	COVID-19 patient	severe COVID-19 patient	5.76228	3044	1664	Natural killer cells	NK cells	severe COVID-19 patient
toy	6852	1753	S1	AGTTCGACACTATCGA-1	Sample 1_nCoV 1 scRNA-seq [SW103]	GSM4509011	63	PBMC	M	COVID-19 patient	severe COVID-19 patient	9.31115	2726	1036	Naive B cells	B cells	severe COVID-19 patient
toy	17974	3714	S1	AGTTCGAGTCGGCCTA-1	Sample 1_nCoV 1 scRNA-seq [SW103]	GSM4509011	63	PBMC	M	COVID-19 patient	severe COVID-19 patient	5.49127	2555	1087	Classical monocytes	Monocytes	severe COVID-19 patient
toy	4401	1391	S1	AGTTCGATCAAGAAAC-1	Sample 1_nCoV 1 scRNA-seq [SW103]	GSM4509011	63	PBMC	M	COVID-19 patient	severe COVID-19 patient	6.81663	2893	1355	Naive B cells	B cells	severe COVID-19 patient
toy	625	364	S1	ATACCGAAGACCATAA-1	Sample 1_nCoV 1 scRNA-seq [SW103]	GSM4509011	63	PBMC	M	COVID-19 patient	severe COVID-19 patient	2.88	1875	447	Intermediate monocytes	NA	severe COVID-19 patient
toy	563	299	S1	ATACCGAAGACTGTTC-1	Sample 1_nCoV 1 scRNA-seq [SW103]	GSM4509011	63	PBMC	M	COVID-19 patient	severe COVID-19 patient	2.6643	1812	427	HSC_-G-CSF	HSC_-G-CSF	severe COVID-19 patient
toy	551	261	S1	ATACCGACACGACCTG-1	Sample 1_nCoV 1 scRNA-seq [SW103]	GSM4509011	63	PBMC	M	COVID-19 patient	severe COVID-19 patient	12.1597	1874	393	Platelets	Platelets	severe COVID-19 patient
toy	1837	231	S1	ATACCGATCCTCTAAT-1	Sample 1_nCoV 1 scRNA-seq [SW103]	GSM4509011	63	PBMC	M	COVID-19 patient	severe COVID-19 patient	11.1051	2210	231	Erythroblast	Erythroblast	severe COVID-19 patient
toy	4845	1708	S1	ATACCTTAGAAGTGTT-1	Sample 1_nCoV 1 scRNA-seq [SW103]	GSM4509011	63	PBMC	M	COVID-19 patient	severe COVID-19 patient	10.0929	3013	1610	Classical monocytes	Monocytes	severe COVID-19 patient
toy	7826	2387	S1	ATACCTTAGCTTTCCC-1	Sample 1_nCoV 1 scRNA-seq [SW103]	GSM4509011	63	PBMC	M	COVID-19 patient	severe COVID-19 patient	6.8873	2494	1080	Natural killer cells	NK cells	severe COVID-19 patient
toy	15991	3688	S1	ATACCTTAGGTTGACG-1	Sample 1_nCoV 1 scRNA-seq [SW103]	GSM4509011	63	PBMC	M	COVID-19 patient	severe COVID-19 patient	6.24726	2580	1230	Classical monocytes	Monocytes	severe COVID-19 patient
toy	573	344	S1	ATACCTTGTCGCATTA-1	Sample 1_nCoV 1 scRNA-seq [SW103]	GSM4509011	63	PBMC	M	COVID-19 patient	severe COVID-19 patient	1.91972	1739	487	Platelets	Platelets	severe COVID-19 patient
toy	634	230	S1	ATACTTCAGTCGAATA-1	Sample 1_nCoV 1 scRNA-seq [SW103]	GSM4509011	63	PBMC	M	COVID-19 patient	severe COVID-19 patient	5.99369	1979	327	HSC_-G-CSF	HSC_-G-CSF	severe COVID-19 patient
toy	4058	1367	S1	ATACTTCGTCGCACGT-1	Sample 1_nCoV 1 scRNA-seq [SW103]	GSM4509011	63	PBMC	M	COVID-19 patient	severe COVID-19 patient	5.56925	2854	1341	Naive B cells	B cells	severe COVID-19 patient
toy	636	303	S1	ATACTTCTCCGTACGG-1	Sample 1_nCoV 1 scRNA-seq [SW103]	GSM4509011	63	PBMC	M	COVID-19 patient	severe COVID-19 patient	8.01887	1847	430	HSC_-G-CSF	HSC_-G-CSF	severe COVID-19 patient
toy	12670	3425	S1	ATACTTCTCGAAGAAT-1	Sample 1_nCoV 1 scRNA-seq [SW103]	GSM4509011	63	PBMC	M	COVID-19 patient	severe COVID-19 patient	9.88161	2619	1314	Classical monocytes	Monocytes	severe COVID-19 patient
toy	2835	1169	S1	ATAGACCAGAGCACTG-1	Sample 1_nCoV 1 scRNA-seq [SW103]	GSM4509011	63	PBMC	M	COVID-19 patient	severe COVID-19 patient	5.36155	2636	1168	Classical monocytes	Monocytes	severe COVID-19 patient
toy	7422	1860	S1	ATAGACCAGGGTCTTT-1	Sample 1_nCoV 1 scRNA-seq [SW103]	GSM4509011	63	PBMC	M	COVID-19 patient	severe COVID-19 patient	7.82808	2502	861	Th1/Th17 cells	CD4+ T cells	severe COVID-19 patient
toy	870	255	S1	ATAGACCCACCTGCGA-1	Sample 1_nCoV 1 scRNA-seq [SW103]	GSM4509011	63	PBMC	M	COVID-19 patient	severe COVID-19 patient	14.5977	2079	349	Platelets	Platelets	severe COVID-19 patient
toy	3640	1527	S1	ATAGACCCACGCTGTG-1	Sample 1_nCoV 1 scRNA-seq [SW103]	GSM4509011	63	PBMC	M	COVID-19 patient	severe COVID-19 patient	8.15934	2895	1521	Natural killer cells	NK cells	severe COVID-19 patient
toy	10030	2112	S1	ATAGACCCACTACTTT-1	Sample 1_nCoV 1 scRNA-seq [SW103]	GSM4509011	63	PBMC	M	COVID-19 patient	severe COVID-19 patient	5.66301	2388	654	Central memory CD8 T cells	CD8+ T cells	severe COVID-19 patient
toy	876	494	S1	ATAGAGAAGATTCGCT-1	Sample 1_nCoV 1 scRNA-seq [SW103]	GSM4509011	63	PBMC	M	COVID-19 patient	severe COVID-19 patient	2.05479	2044	542	Intermediate monocytes	NA	severe COVID-19 patient
toy	746	306	S1	ATAGAGAAGTAAGACT-1	Sample 1_nCoV 1 scRNA-seq [SW103]	GSM4509011	63	PBMC	M	COVID-19 patient	severe COVID-19 patient	3.35121	1992	386	HSC_-G-CSF	HSC_-G-CSF	severe COVID-19 patient
toy	7429	1625	S1	ATAGAGAAGTGCCCGT-1	Sample 1_nCoV 1 scRNA-seq [SW103]	GSM4509011	63	PBMC	M	COVID-19 patient	severe COVID-19 patient	9.22062	2476	718	Non-switched memory B cells	B cells	severe COVID-19 patient
toy	699	270	S1	ATAGAGACAAGATGGC-1	Sample 1_nCoV 1 scRNA-seq [SW103]	GSM4509011	63	PBMC	M	COVID-19 patient	severe COVID-19 patient	15.0215	1964	383	Platelets	Platelets	severe COVID-19 patient
toy	9955	2408	S1	ATAGAGACAGCTATAC-1	Sample 1_nCoV 1 scRNA-seq [SW103]	GSM4509011	63	PBMC	M	COVID-19 patient	severe COVID-19 patient	16.9965	2782	754	Plasmablasts	B cells	severe COVID-19 patient
toy	5462	1866	S1	ATAGAGACATGTTCGA-1	Sample 1_nCoV 1 scRNA-seq [SW103]	GSM4509011	63	PBMC	M	COVID-19 patient	severe COVID-19 patient	9.53863	3056	1630	Classical monocytes	Monocytes	severe COVID-19 patient
toy	7873	1930	S1	ATAGAGATCTCTTCAA-1	Sample 1_nCoV 1 scRNA-seq [SW103]	GSM4509011	63	PBMC	M	COVID-19 patient	severe COVID-19 patient	5.63953	2435	786	Non-switched memory B cells	B cells	severe COVID-19 patient
toy	1370	443	S1	ATAGGCTCAGATACTC-1	Sample 1_nCoV 1 scRNA-seq [SW103]	GSM4509011	63	PBMC	M	COVID-19 patient	severe COVID-19 patient	7.51825	2132	483	Platelets	Platelets	severe COVID-19 patient
toy	4704	1426	S1	ATAGGCTGTAGATTGA-1	Sample 1_nCoV 1 scRNA-seq [SW103]	GSM4509011	63	PBMC	M	COVID-19 patient	severe COVID-19 patient	6.67517	2961	1368	Naive B cells	B cells	severe COVID-19 patient
toy	2776	1177	S1	ATAGGCTTCCCATGGG-1	Sample 1_nCoV 1 scRNA-seq [SW103]	GSM4509011	63	PBMC	M	COVID-19 patient	severe COVID-19 patient	11.5634	2605	1176	Classical monocytes	Monocytes	severe COVID-19 patient
toy	9468	2081	S1	ATATCCTAGGTGGGTT-1	Sample 1_nCoV 1 scRNA-seq [SW103]	GSM4509011	63	PBMC	M	COVID-19 patient	severe COVID-19 patient	5.38657	2372	651	Switched memory B cells	B cells	severe COVID-19 patient
toy	642	265	S1	ATATCCTCAAGTACCT-1	Sample 1_nCoV 1 scRNA-seq [SW103]	GSM4509011	63	PBMC	M	COVID-19 patient	severe COVID-19 patient	8.56698	1977	349	HSC_-G-CSF	HSC_-G-CSF	severe COVID-19 patient
toy	762	331	S1	ATATCCTCACCGTGCA-1	Sample 1_nCoV 1 scRNA-seq [SW103]	GSM4509011	63	PBMC	M	COVID-19 patient	severe COVID-19 patient	9.84252	1952	433	Platelets	Platelets	severe COVID-19 patient
toy	5322	1919	S1	ATATCCTGTAACTTCG-1	Sample 1_nCoV 1 scRNA-seq [SW103]	GSM4509011	63	PBMC	M	COVID-19 patient	severe COVID-19 patient	7.10259	3076	1725	Classical monocytes	Monocytes	severe COVID-19 patient
toy	12690	3310	S1	ATATCCTGTGGGTCAA-1	Sample 1_nCoV 1 scRNA-seq [SW103]	GSM4509011	63	PBMC	M	COVID-19 patient	severe COVID-19 patient	6.91095	2605	1219	Vd2 gd T cells	T cells	severe COVID-19 patient
toy	6037	1893	S1	ATATCCTGTTCCGGTG-1	Sample 1_nCoV 1 scRNA-seq [SW103]	GSM4509011	63	PBMC	M	COVID-19 patient	severe COVID-19 patient	7.9841	3007	1492	Natural killer cells	NK cells	severe COVID-19 patient
toy	1149	330	S1	ATATCCTTCCTCGCAT-1	Sample 1_nCoV 1 scRNA-seq [SW103]	GSM4509011	63	PBMC	M	COVID-19 patient	severe COVID-19 patient	8.35509	2226	379	Platelets	Platelets	severe COVID-19 patient
toy	6634	1683	S1	ATCACAGAGAGGTCAC-1	Sample 1_nCoV 1 scRNA-seq [SW103]	GSM4509011	63	PBMC	M	COVID-19 patient	severe COVID-19 patient	7.28068	2761	1102	Switched memory B cells	B cells	severe COVID-19 patient
toy	3788	1420	S1	ATCACAGCAACTTGGT-1	Sample 1_nCoV 1 scRNA-seq [SW103]	GSM4509011	63	PBMC	M	COVID-19 patient	severe COVID-19 patient	8.05174	2867	1406	Vd2 gd T cells	T cells	severe COVID-19 patient
toy	565	281	S1	ATCACAGGTATCGCAT-1	Sample 1_nCoV 1 scRNA-seq [SW103]	GSM4509011	63	PBMC	M	COVID-19 patient	severe COVID-19 patient	18.7611	1833	420	HSC_-G-CSF	HSC_-G-CSF	severe COVID-19 patient
toy	11490	2985	S1	ATCACAGTCCGTGGTG-1	Sample 1_nCoV 1 scRNA-seq [SW103]	GSM4509011	63	PBMC	M	COVID-19 patient	severe COVID-19 patient	4.92602	2510	1130	Classical monocytes	Monocytes	severe COVID-19 patient
toy	13146	3312	S1	ATCACAGTCGGACTGC-1	Sample 1_nCoV 1 scRNA-seq [SW103]	GSM4509011	63	PBMC	M	COVID-19 patient	severe COVID-19 patient	13.989	2581	1208	Classical monocytes	Monocytes	severe COVID-19 patient
toy	1879	526	S1	ATCACAGTCTTGATTC-1	Sample 1_nCoV 1 scRNA-seq [SW103]	GSM4509011	63	PBMC	M	COVID-19 patient	severe COVID-19 patient	12.9856	2273	526	Platelets	Platelets	severe COVID-19 patient
toy	708	457	S1	ATCACGAAGCCACTCG-1	Sample 1_nCoV 1 scRNA-seq [SW103]	GSM4509011	63	PBMC	M	COVID-19 patient	severe COVID-19 patient	3.67232	1899	522	NA	NA	severe COVID-19 patient
toy	2349	212	S1	ATCACGAAGGTGAGAA-1	Sample 1_nCoV 1 scRNA-seq [SW103]	GSM4509011	63	PBMC	M	COVID-19 patient	severe COVID-19 patient	1.83057	2402	212	Erythroblast	Erythroblast	severe COVID-19 patient
toy	609	219	S1	ATCACGAAGTATGGAT-1	Sample 1_nCoV 1 scRNA-seq [SW103]	GSM4509011	63	PBMC	M	COVID-19 patient	severe COVID-19 patient	4.92611	1939	342	HSC_-G-CSF	HSC_-G-CSF	severe COVID-19 patient
toy	3015	1053	S1	ATCACGAGTAGATGTA-1	Sample 1_nCoV 1 scRNA-seq [SW103]	GSM4509011	63	PBMC	M	COVID-19 patient	severe COVID-19 patient	6.66667	2661	1052	Non-switched memory B cells	B cells	severe COVID-19 patient
toy	6417	1996	S1	ATCACGAGTCCAGCCA-1	Sample 1_nCoV 1 scRNA-seq [SW103]	GSM4509011	63	PBMC	M	COVID-19 patient	severe COVID-19 patient	10.3319	2860	1420	Classical monocytes	Monocytes	severe COVID-19 patient
toy	4700	1691	S1	ATCACGATCACTGAAC-1	Sample 1_nCoV 1 scRNA-seq [SW103]	GSM4509011	63	PBMC	M	COVID-19 patient	severe COVID-19 patient	10.3404	3048	1630	Natural killer cells	NK cells	severe COVID-19 patient
toy	5596	1745	S1	ATCACGATCGAGAACG-1	Sample 1_nCoV 1 scRNA-seq [SW103]	GSM4509011	63	PBMC	M	COVID-19 patient	severe COVID-19 patient	5.73624	3000	1474	Th1 cells	T cells	severe COVID-19 patient
toy	1414	207	S1	ATCACTTAGAGGCTGT-1	Sample 1_nCoV 1 scRNA-seq [SW103]	GSM4509011	63	PBMC	M	COVID-19 patient	severe COVID-19 patient	0.49505	2025	251	NA	NA	severe COVID-19 patient
toy	8697	2184	S1	ATCACTTCATTGCTTT-1	Sample 1_nCoV 1 scRNA-seq [SW103]	GSM4509011	63	PBMC	M	COVID-19 patient	severe COVID-19 patient	8.47419	2374	770	Th2 cells	CD4+ T cells	severe COVID-19 patient
toy	5433	1408	S1	ATCACTTGTACAAAGT-1	Sample 1_nCoV 1 scRNA-seq [SW103]	GSM4509011	63	PBMC	M	COVID-19 patient	severe COVID-19 patient	4.54629	2909	1209	Naive B cells	B cells	severe COVID-19 patient
toy	9883	2161	S1	ATCACTTTCGGCATCG-1	Sample 1_nCoV 1 scRNA-seq [SW103]	GSM4509011	63	PBMC	M	COVID-19 patient	severe COVID-19 patient	5.05919	2370	643	Exhausted B cells	B cells	severe COVID-19 patient
toy	9545	1917	S1	ATCAGGTAGGAACTCG-1	Sample 1_nCoV 1 scRNA-seq [SW103]	GSM4509011	63	PBMC	M	COVID-19 patient	severe COVID-19 patient	5.47931	2377	592	Th2 cells	CD8+ T cells	severe COVID-19 patient
toy	11973	3168	S1	ATCAGGTCACAACGTT-1	Sample 1_nCoV 1 scRNA-seq [SW103]	GSM4509011	63	PBMC	M	COVID-19 patient	severe COVID-19 patient	6.09705	2576	1225	Classical monocytes	Monocytes	severe COVID-19 patient
toy	25667	4785	S1	ATCAGGTCACAGAGCA-1	Sample 1_nCoV 1 scRNA-seq [SW103]	GSM4509011	63	PBMC	M	COVID-19 patient	severe COVID-19 patient	7.13367	2459	1128	Classical monocytes	Monocytes	severe COVID-19 patient
toy	972	386	S1	ATCAGGTGTTATAGCC-1	Sample 1_nCoV 1 scRNA-seq [SW103]	GSM4509011	63	PBMC	M	COVID-19 patient	severe COVID-19 patient	6.06996	2093	464	Platelets	Platelets	severe COVID-19 patient
toy	4782	1687	S1	ATCAGGTTCACTTATC-1	Sample 1_nCoV 1 scRNA-seq [SW103]	GSM4509011	63	PBMC	M	COVID-19 patient	severe COVID-19 patient	8.84567	3040	1591	Natural killer cells	NK cells	severe COVID-19 patient
toy	18334	4061	S1	ATCATTCAGTGTAGTA-1	Sample 1_nCoV 1 scRNA-seq [SW103]	GSM4509011	63	PBMC	M	COVID-19 patient	severe COVID-19 patient	7.40155	2523	1164	Classical monocytes	Monocytes	severe COVID-19 patient
toy	11799	2253	S1	ATCATTCCAGCTGTCG-1	Sample 1_nCoV 1 scRNA-seq [SW103]	GSM4509011	63	PBMC	M	COVID-19 patient	severe COVID-19 patient	8.36512	2485	724	Non-switched memory B cells	B cells	severe COVID-19 patient
toy	8313	2534	S1	ATCATTCCATTAGGCT-1	Sample 1_nCoV 1 scRNA-seq [SW103]	GSM4509011	63	PBMC	M	COVID-19 patient	severe COVID-19 patient	7.75893	2425	1084	Classical monocytes	Monocytes	severe COVID-19 patient
toy	617	255	S1	ATCATTCTCAAGATAG-1	Sample 1_nCoV 1 scRNA-seq [SW103]	GSM4509011	63	PBMC	M	COVID-19 patient	severe COVID-19 patient	14.7488	1935	374	HSC_-G-CSF	HSC_-G-CSF	severe COVID-19 patient
toy	613	241	S1	ATCATTCTCTAGGAAA-1	Sample 1_nCoV 1 scRNA-seq [SW103]	GSM4509011	63	PBMC	M	COVID-19 patient	severe COVID-19 patient	16.3132	1929	364	HSC_-G-CSF	HSC_-G-CSF	severe COVID-19 patient
toy	4919	1744	S1	ATCCACCAGGTCCTGC-1	Sample 1_nCoV 1 scRNA-seq [SW103]	GSM4509011	63	PBMC	M	COVID-19 patient	severe COVID-19 patient	8.68063	3026	1647	Classical monocytes	Monocytes	severe COVID-19 patient
toy	814	263	S1	ATCCACCCAGTTTCGA-1	Sample 1_nCoV 1 scRNA-seq [SW103]	GSM4509011	63	PBMC	M	COVID-19 patient	severe COVID-19 patient	5.89681	1845	370	Progenitor cells	B cells	severe COVID-19 patient
toy	13009	3290	S1	ATCCACCTCCTTTGAT-1	Sample 1_nCoV 1 scRNA-seq [SW103]	GSM4509011	63	PBMC	M	COVID-19 patient	severe COVID-19 patient	7.77154	2658	1248	Classical monocytes	Monocytes	severe COVID-19 patient
toy	1599	637	S1	ATCCATTAGCGCCGTT-1	Sample 1_nCoV 1 scRNA-seq [SW103]	GSM4509011	63	PBMC	M	COVID-19 patient	severe COVID-19 patient	19.8249	2166	639	Naive CD4 T cells	NA	severe COVID-19 patient
toy	3871	1573	S1	ATCCATTGTCCCAAAT-1	Sample 1_nCoV 1 scRNA-seq [SW103]	GSM4509011	63	PBMC	M	COVID-19 patient	severe COVID-19 patient	10.5141	2880	1562	Classical monocytes	Monocytes	severe COVID-19 patient
toy	7138	2005	S1	ATCCATTGTGGCTGCT-1	Sample 1_nCoV 1 scRNA-seq [SW103]	GSM4509011	63	PBMC	M	COVID-19 patient	severe COVID-19 patient	6.93472	2658	1089	MAIT cells	T cells	severe COVID-19 patient
toy	6764	1769	S1	ATCCATTTCGAGCTGC-1	Sample 1_nCoV 1 scRNA-seq [SW103]	GSM4509011	63	PBMC	M	COVID-19 patient	severe COVID-19 patient	8.72265	2761	1116	Non-switched memory B cells	B cells	severe COVID-19 patient
toy	644	359	S1	ATCCATTTCGGCATAT-1	Sample 1_nCoV 1 scRNA-seq [SW103]	GSM4509011	63	PBMC	M	COVID-19 patient	severe COVID-19 patient	3.10559	1801	476	HSC_-G-CSF	HSC_-G-CSF	severe COVID-19 patient
toy	5793	1450	S1	ATCCATTTCTGTAAGC-1	Sample 1_nCoV 1 scRNA-seq [SW103]	GSM4509011	63	PBMC	M	COVID-19 patient	severe COVID-19 patient	7.87157	2919	1191	Naive B cells	B cells	severe COVID-19 patient
toy	15675	3008	S1	ATCCCTGAGATGTTGA-1	Sample 1_nCoV 1 scRNA-seq [SW103]	GSM4509011	63	PBMC	M	COVID-19 patient	severe COVID-19 patient	6.88357	2470	808	Th17 cells	CD4+ T cells	severe COVID-19 patient
toy	3560	1244	S1	ATCCCTGAGTGATTCC-1	Sample 1_nCoV 1 scRNA-seq [SW103]	GSM4509011	63	PBMC	M	COVID-19 patient	severe COVID-19 patient	4.07303	2893	1223	Platelets	Platelets	severe COVID-19 patient
toy	7608	2385	S1	ATCCCTGCATGTGGCC-1	Sample 1_nCoV 1 scRNA-seq [SW103]	GSM4509011	63	PBMC	M	COVID-19 patient	severe COVID-19 patient	7.59727	2446	1069	Classical monocytes	Monocytes	severe COVID-19 patient
toy	5032	1906	S1	ATCCCTGGTGTTAAAG-1	Sample 1_nCoV 1 scRNA-seq [SW103]	GSM4509011	63	PBMC	M	COVID-19 patient	severe COVID-19 patient	9.51908	3122	1788	Natural killer cells	NK cells	severe COVID-19 patient
toy	1140	476	S1	ATCCCTGGTTCGTGCG-1	Sample 1_nCoV 1 scRNA-seq [SW103]	GSM4509011	63	PBMC	M	COVID-19 patient	severe COVID-19 patient	8.94737	2278	502	Non-switched memory B cells	B cells	severe COVID-19 patient
toy	2487	1151	S1	ATCCCTGTCTAGAACC-1	Sample 1_nCoV 1 scRNA-seq [SW103]	GSM4509011	63	PBMC	M	COVID-19 patient	severe COVID-19 patient	5.38802	2483	1149	Classical monocytes	Monocytes	severe COVID-19 patient
toy	4710	1648	S1	ATCCGTCCAAGGTCGA-1	Sample 1_nCoV 1 scRNA-seq [SW103]	GSM4509011	63	PBMC	M	COVID-19 patient	severe COVID-19 patient	8.36518	3002	1587	Classical monocytes	Monocytes	severe COVID-19 patient
toy	9734	2723	S1	ATCCGTCGTCTGTGCG-1	Sample 1_nCoV 1 scRNA-seq [SW103]	GSM4509011	63	PBMC	M	COVID-19 patient	severe COVID-19 patient	7.00637	2455	1090	Classical monocytes	Monocytes	severe COVID-19 patient
toy	4779	1884	S1	ATCCGTCGTGTGTTTG-1	Sample 1_nCoV 1 scRNA-seq [SW103]	GSM4509011	63	PBMC	M	COVID-19 patient	severe COVID-19 patient	9.3325	3062	1807	Classical monocytes	Monocytes	severe COVID-19 patient
toy	11485	2497	S1	ATCCGTCTCCACTAGA-1	Sample 1_nCoV 1 scRNA-seq [SW103]	GSM4509011	63	PBMC	M	COVID-19 patient	severe COVID-19 patient	15.4724	2469	795	Non-switched memory B cells	B cells	severe COVID-19 patient
toy	6297	1968	S1	ATCCGTCTCTATTCGT-1	Sample 1_nCoV 1 scRNA-seq [SW103]	GSM4509011	63	PBMC	M	COVID-19 patient	severe COVID-19 patient	5.87581	2866	1416	Classical monocytes	Monocytes	severe COVID-19 patient
toy	5259	1763	S1	ATCCTATAGAGTCAGC-1	Sample 1_nCoV 1 scRNA-seq [SW103]	GSM4509011	63	PBMC	M	COVID-19 patient	severe COVID-19 patient	8.44267	3033	1580	Natural killer cells	NK cells	severe COVID-19 patient
toy	2443	897	S1	ATCCTATAGGGTAATT-1	Sample 1_nCoV 1 scRNA-seq [SW103]	GSM4509011	63	PBMC	M	COVID-19 patient	severe COVID-19 patient	4.01146	2443	897	Central memory CD8 T cells	CD8+ T cells	severe COVID-19 patient
toy	3554	1471	S1	ATCCTATCAGGTTCCG-1	Sample 1_nCoV 1 scRNA-seq [SW103]	GSM4509011	63	PBMC	M	COVID-19 patient	severe COVID-19 patient	8.94766	2870	1465	Classical monocytes	Monocytes	severe COVID-19 patient
toy	4037	1203	S1	ATCCTATGTACAAGTA-1	Sample 1_nCoV 1 scRNA-seq [SW103]	GSM4509011	63	PBMC	M	COVID-19 patient	severe COVID-19 patient	10.057	2810	1179	Naive B cells	B cells	severe COVID-19 patient
toy	9595	2842	S1	ATCCTATGTTCTTGCC-1	Sample 1_nCoV 1 scRNA-seq [SW103]	GSM4509011	63	PBMC	M	COVID-19 patient	severe COVID-19 patient	7.15998	2447	1079	Classical monocytes	Monocytes	severe COVID-19 patient
toy	8467	2086	S1	ATCGATGAGAAACCAT-1	Sample 1_nCoV 1 scRNA-seq [SW103]	GSM4509011	63	PBMC	M	COVID-19 patient	severe COVID-19 patient	6.12968	2392	779	T regulatory cells	T cells	severe COVID-19 patient
toy	8629	1903	S1	ATCGATGAGCAAGTCG-1	Sample 1_nCoV 1 scRNA-seq [SW103]	GSM4509011	63	PBMC	M	COVID-19 patient	severe COVID-19 patient	8.49461	2400	674	Non-switched memory B cells	B cells	severe COVID-19 patient
toy	5207	1908	S1	ATCGATGCAGTAGAGC-1	Sample 1_nCoV 1 scRNA-seq [SW103]	GSM4509011	63	PBMC	M	COVID-19 patient	severe COVID-19 patient	9.02631	3071	1750	Classical monocytes	Monocytes	severe COVID-19 patient
toy	7480	2378	S1	ATCGATGCATGGGTTT-1	Sample 1_nCoV 1 scRNA-seq [SW103]	GSM4509011	63	PBMC	M	COVID-19 patient	severe COVID-19 patient	5.25401	2541	1167	Vd2 gd T cells	T cells	severe COVID-19 patient
toy	7945	2246	S1	ATCGCCTCATATAGCC-1	Sample 1_nCoV 1 scRNA-seq [SW103]	GSM4509011	63	PBMC	M	COVID-19 patient	severe COVID-19 patient	3.0837	2427	953	Th2 cells	CD4+ T cells	severe COVID-19 patient
toy	10786	2910	S1	ATCGGATAGTCACGAG-1	Sample 1_nCoV 1 scRNA-seq [SW103]	GSM4509011	63	PBMC	M	COVID-19 patient	severe COVID-19 patient	5.36807	2506	1118	Classical monocytes	Monocytes	severe COVID-19 patient
toy	20588	4104	S1	ATCGGATCAAATGAAC-1	Sample 1_nCoV 1 scRNA-seq [SW103]	GSM4509011	63	PBMC	M	COVID-19 patient	severe COVID-19 patient	7.52866	2493	1003	Intermediate monocytes	Monocytes	severe COVID-19 patient
toy	3019	1131	S1	ATCGGATCAGCTCTGG-1	Sample 1_nCoV 1 scRNA-seq [SW103]	GSM4509011	63	PBMC	M	COVID-19 patient	severe COVID-19 patient	11.3614	2683	1131	Low-density neutrophils	Neutrophils	severe COVID-19 patient
toy	4612	1370	S1	ATCGGATGTGCCAAGA-1	Sample 1_nCoV 1 scRNA-seq [SW103]	GSM4509011	63	PBMC	M	COVID-19 patient	severe COVID-19 patient	6.7216	2920	1326	Naive B cells	B cells	severe COVID-19 patient
toy	672	399	S1	ATCGGATTCCTAAACG-1	Sample 1_nCoV 1 scRNA-seq [SW103]	GSM4509011	63	PBMC	M	COVID-19 patient	severe COVID-19 patient	6.54762	1799	511	Platelets	Platelets	severe COVID-19 patient
toy	20033	4080	S1	ATCGGCGCAGTGGCTC-1	Sample 1_nCoV 1 scRNA-seq [SW103]	GSM4509011	63	PBMC	M	COVID-19 patient	severe COVID-19 patient	7.30794	2439	1043	Classical monocytes	Monocytes	severe COVID-19 patient
toy	15612	3774	S1	ATCGGCGCATTGAAGA-1	Sample 1_nCoV 1 scRNA-seq [SW103]	GSM4509011	63	PBMC	M	COVID-19 patient	severe COVID-19 patient	6.64873	2666	1279	Vd2 gd T cells	T cells	severe COVID-19 patient
toy	6166	1744	S1	ATCGGCGGTAGTTACC-1	Sample 1_nCoV 1 scRNA-seq [SW103]	GSM4509011	63	PBMC	M	COVID-19 patient	severe COVID-19 patient	5.35193	2860	1263	T regulatory cells	CD4+ T cells	severe COVID-19 patient
toy	12392	3121	S1	ATCGGCGGTGAAGCTG-1	Sample 1_nCoV 1 scRNA-seq [SW103]	GSM4509011	63	PBMC	M	COVID-19 patient	severe COVID-19 patient	7.2224	2590	1172	Central memory CD8 T cells	CD8+ T cells	severe COVID-19 patient
toy	3958	1444	S1	ATCGGCGTCACTACTT-1	Sample 1_nCoV 1 scRNA-seq [SW103]	GSM4509011	63	PBMC	M	COVID-19 patient	severe COVID-19 patient	5.15412	2845	1436	Classical monocytes	Monocytes	severe COVID-19 patient
toy	2939	1224	S1	ATCGGCGTCTTGGAAC-1	Sample 1_nCoV 1 scRNA-seq [SW103]	GSM4509011	63	PBMC	M	COVID-19 patient	severe COVID-19 patient	9.49302	2675	1224	Classical monocytes	Monocytes	severe COVID-19 patient
toy	3922	1155	S1	ATCGTAGAGTCCTGTA-1	Sample 1_nCoV 1 scRNA-seq [SW103]	GSM4509011	63	PBMC	M	COVID-19 patient	severe COVID-19 patient	7.21571	2791	1140	Naive B cells	B cells	severe COVID-19 patient
toy	16956	3756	S1	ATCGTAGCAAACCATC-1	Sample 1_nCoV 1 scRNA-seq [SW103]	GSM4509011	63	PBMC	M	COVID-19 patient	severe COVID-19 patient	6.30455	2630	1196	Classical monocytes	Monocytes	severe COVID-19 patient
toy	3465	1385	S1	ATCGTAGCACAGTATC-1	Sample 1_nCoV 1 scRNA-seq [SW103]	GSM4509011	63	PBMC	M	COVID-19 patient	severe COVID-19 patient	10.2453	2831	1381	Classical monocytes	Monocytes	severe COVID-19 patient
toy	5394	1837	S1	ATCGTAGTCATTGTTC-1	Sample 1_nCoV 1 scRNA-seq [SW103]	GSM4509011	63	PBMC	M	COVID-19 patient	severe COVID-19 patient	9.23248	3064	1640	Classical monocytes	Monocytes	severe COVID-19 patient
toy	533	311	S1	ATCGTCCAGACTAGAT-1	Sample 1_nCoV 1 scRNA-seq [SW103]	GSM4509011	63	PBMC	M	COVID-19 patient	severe COVID-19 patient	10.3189	1794	445	HSC_-G-CSF	HSC_-G-CSF	severe COVID-19 patient
toy	7698	1955	S1	ATCGTCCAGGTGAGCT-1	Sample 1_nCoV 1 scRNA-seq [SW103]	GSM4509011	63	PBMC	M	COVID-19 patient	severe COVID-19 patient	5.9496	2447	825	Exhausted B cells	B cells	severe COVID-19 patient
toy	4282	1551	S1	ATCGTCCAGTAAGGGA-1	Sample 1_nCoV 1 scRNA-seq [SW103]	GSM4509011	63	PBMC	M	COVID-19 patient	severe COVID-19 patient	6.37553	2947	1521	Natural killer cells	NK cells	severe COVID-19 patient
toy	22050	4314	S1	ATCGTCCGTAGGCTCC-1	Sample 1_nCoV 1 scRNA-seq [SW103]	GSM4509011	63	PBMC	M	COVID-19 patient	severe COVID-19 patient	7.56916	2469	1100	Classical monocytes	Monocytes	severe COVID-19 patient
toy	6137	326	S1	ATCGTCCTCATCCTAT-1	Sample 1_nCoV 1 scRNA-seq [SW103]	GSM4509011	63	PBMC	M	COVID-19 patient	severe COVID-19 patient	0.439954	3198	188	Erythroblast	Erythroblast	severe COVID-19 patient
toy	3648	1497	S1	ATCGTCCTCTTTCGAT-1	Sample 1_nCoV 1 scRNA-seq [SW103]	GSM4509011	63	PBMC	M	COVID-19 patient	severe COVID-19 patient	7.45614	2876	1492	Classical monocytes	Monocytes	severe COVID-19 patient
toy	7198	2354	S1	ATCGTGAAGATTACCC-1	Sample 1_nCoV 1 scRNA-seq [SW103]	GSM4509011	63	PBMC	M	COVID-19 patient	severe COVID-19 patient	9.47485	2572	1214	Classical monocytes	Monocytes	severe COVID-19 patient
toy	3183	1237	S1	ATCTCTACACAGTACT-1	Sample 1_nCoV 1 scRNA-seq [SW103]	GSM4509011	63	PBMC	M	COVID-19 patient	severe COVID-19 patient	10.1477	2749	1237	Classical monocytes	Monocytes	severe COVID-19 patient
toy	839	318	S1	ATCTCTACAGAACCGA-1	Sample 1_nCoV 1 scRNA-seq [SW103]	GSM4509011	63	PBMC	M	COVID-19 patient	severe COVID-19 patient	12.2765	2056	391	HSC_-G-CSF	HSC_-G-CSF	severe COVID-19 patient
toy	9594	2902	S1	ATCTCTACATAGAGGC-1	Sample 1_nCoV 1 scRNA-seq [SW103]	GSM4509011	63	PBMC	M	COVID-19 patient	severe COVID-19 patient	9.24536	2420	1137	Intermediate monocytes	Monocytes	severe COVID-19 patient
toy	4279	1615	S1	ATCTCTAGTGCTCGTG-1	Sample 1_nCoV 1 scRNA-seq [SW103]	GSM4509011	63	PBMC	M	COVID-19 patient	severe COVID-19 patient	7.68871	2942	1594	Classical monocytes	Monocytes	severe COVID-19 patient
toy	1005	328	S1	ATCTCTATCGTGGCGT-1	Sample 1_nCoV 1 scRNA-seq [SW103]	GSM4509011	63	PBMC	M	COVID-19 patient	severe COVID-19 patient	4.67662	2116	410	Platelets	Platelets	severe COVID-19 patient
toy	14090	3226	S1	ATCTTCACAACCAATC-1	Sample 1_nCoV 1 scRNA-seq [SW103]	GSM4509011	63	PBMC	M	COVID-19 patient	severe COVID-19 patient	10.7381	2600	1123	Intermediate monocytes	Monocytes	severe COVID-19 patient
toy	8176	1903	S1	ATCTTCAGTGTGCCTG-1	Sample 1_nCoV 1 scRNA-seq [SW103]	GSM4509011	63	PBMC	M	COVID-19 patient	severe COVID-19 patient	5.932	2409	703	Switched memory B cells	B cells	severe COVID-19 patient
toy	757	242	S1	ATCTTCATCAAGGTGG-1	Sample 1_nCoV 1 scRNA-seq [SW103]	GSM4509011	63	PBMC	M	COVID-19 patient	severe COVID-19 patient	10.4359	2020	335	HSC_-G-CSF	HSC_-G-CSF	severe COVID-19 patient
toy	6728	1874	S1	ATCTTCATCCAGTGTA-1	Sample 1_nCoV 1 scRNA-seq [SW103]	GSM4509011	63	PBMC	M	COVID-19 patient	severe COVID-19 patient	4.89001	2784	1186	Naive CD4 T cells	CD4+ T cells	severe COVID-19 patient
toy	2115	648	S1	ATGAAAGAGAATTCAG-1	Sample 1_nCoV 1 scRNA-seq [SW103]	GSM4509011	63	PBMC	M	COVID-19 patient	severe COVID-19 patient	7.94326	2292	646	Platelets	Platelets	severe COVID-19 patient
toy	4521	1424	S1	ATGAAAGGTTCCATTT-1	Sample 1_nCoV 1 scRNA-seq [SW103]	GSM4509011	63	PBMC	M	COVID-19 patient	severe COVID-19 patient	9.22362	2920	1355	Follicular helper T cells	CD4+ T cells	severe COVID-19 patient
toy	3446	988	S1	ATGAAAGTCGCCTTGT-1	Sample 1_nCoV 1 scRNA-seq [SW103]	GSM4509011	63	PBMC	M	COVID-19 patient	severe COVID-19 patient	10.592	2720	983	Naive CD4 T cells	CD4+ T cells	severe COVID-19 patient
toy	5687	1806	S1	ATGACCAAGAGTCCGA-1	Sample 1_nCoV 1 scRNA-seq [SW103]	GSM4509011	63	PBMC	M	COVID-19 patient	severe COVID-19 patient	5.57412	2992	1498	Classical monocytes	Monocytes	severe COVID-19 patient
toy	888	392	S1	ATGACCACAGGTCAGA-1	Sample 1_nCoV 1 scRNA-seq [SW103]	GSM4509011	63	PBMC	M	COVID-19 patient	severe COVID-19 patient	7.09459	2051	461	HSC_-G-CSF	HSC_-G-CSF	severe COVID-19 patient
toy	797	229	S1	ATGACCAGTACGTGTT-1	Sample 1_nCoV 1 scRNA-seq [SW103]	GSM4509011	63	PBMC	M	COVID-19 patient	severe COVID-19 patient	3.63864	1893	333	Progenitor cells	NA	severe COVID-19 patient
toy	4654	1255	S1	ATGACCAGTGAGTAGC-1	Sample 1_nCoV 1 scRNA-seq [SW103]	GSM4509011	63	PBMC	M	COVID-19 patient	severe COVID-19 patient	6.42458	2900	1197	Naive B cells	B cells	severe COVID-19 patient
toy	7797	1995	S1	ATGACCAGTGCGCTCA-1	Sample 1_nCoV 1 scRNA-seq [SW103]	GSM4509011	63	PBMC	M	COVID-19 patient	severe COVID-19 patient	6.73336	2426	816	Follicular helper T cells	CD4+ T cells	severe COVID-19 patient
toy	672	301	S1	ATGAGGGAGACGACGT-1	Sample 1_nCoV 1 scRNA-seq [SW103]	GSM4509011	63	PBMC	M	COVID-19 patient	severe COVID-19 patient	10.5655	1914	405	HSC_-G-CSF	HSC_-G-CSF	severe COVID-19 patient
toy	5734	1671	S1	ATGAGGGCAGCATGCC-1	Sample 1_nCoV 1 scRNA-seq [SW103]	GSM4509011	63	PBMC	M	COVID-19 patient	severe COVID-19 patient	7.81304	2993	1345	Vd2 gd T cells	T cells	severe COVID-19 patient
toy	1804	235	S1	ATGAGGGGTGATAGTA-1	Sample 1_nCoV 1 scRNA-seq [SW103]	GSM4509011	63	PBMC	M	COVID-19 patient	severe COVID-19 patient	0.443459	2204	235	Exhausted B cells	NA	severe COVID-19 patient
toy	5205	1727	S1	ATGAGGGTCAAGTCGT-1	Sample 1_nCoV 1 scRNA-seq [SW103]	GSM4509011	63	PBMC	M	COVID-19 patient	severe COVID-19 patient	8.81844	3014	1553	Vd2 gd T cells	T cells	severe COVID-19 patient
toy	5092	1610	S1	ATGAGGGTCACGAACT-1	Sample 1_nCoV 1 scRNA-seq [SW103]	GSM4509011	63	PBMC	M	COVID-19 patient	severe COVID-19 patient	17.5373	2996	1460	Classical monocytes	Monocytes	severe COVID-19 patient
toy	4022	1375	S1	ATGAGTCAGAGCCGTA-1	Sample 1_nCoV 1 scRNA-seq [SW103]	GSM4509011	63	PBMC	M	COVID-19 patient	severe COVID-19 patient	6.73794	2867	1358	Natural killer cells	NK cells	severe COVID-19 patient
toy	7519	2422	S1	ATGAGTCAGTAAGGGA-1	Sample 1_nCoV 1 scRNA-seq [SW103]	GSM4509011	63	PBMC	M	COVID-19 patient	severe COVID-19 patient	9.57574	2460	1119	Classical monocytes	Monocytes	severe COVID-19 patient
toy	485	263	S1	ATGAGTCGTCAACGCC-1	Sample 1_nCoV 1 scRNA-seq [SW103]	GSM4509011	63	PBMC	M	COVID-19 patient	severe COVID-19 patient	6.80412	1842	400	HSC_-G-CSF	HSC_-G-CSF	severe COVID-19 patient
toy	6637	2083	S1	ATGAGTCTCCACAGCG-1	Sample 1_nCoV 1 scRNA-seq [SW103]	GSM4509011	63	PBMC	M	COVID-19 patient	severe COVID-19 patient	8.61835	2909	1414	Natural killer cells	NK cells	severe COVID-19 patient
toy	6383	1810	S1	ATGATCGAGGGCAGTT-1	Sample 1_nCoV 1 scRNA-seq [SW103]	GSM4509011	63	PBMC	M	COVID-19 patient	severe COVID-19 patient	7.44164	2869	1267	Non-switched memory B cells	B cells	severe COVID-19 patient
toy	2838	1138	S1	ATGATCGGTTCTCCCA-1	Sample 1_nCoV 1 scRNA-seq [SW103]	GSM4509011	63	PBMC	M	COVID-19 patient	severe COVID-19 patient	10.5708	2629	1137	Classical monocytes	Monocytes	severe COVID-19 patient
toy	1592	590	S1	ATGATCGTCGAGAGAC-1	Sample 1_nCoV 1 scRNA-seq [SW103]	GSM4509011	63	PBMC	M	COVID-19 patient	severe COVID-19 patient	3.70603	2133	603	Platelets	Platelets	severe COVID-19 patient
toy	551	264	S1	ATGATCGTCGAGCACC-1	Sample 1_nCoV 1 scRNA-seq [SW103]	GSM4509011	63	PBMC	M	COVID-19 patient	severe COVID-19 patient	4.35572	1845	398	HSC_-G-CSF	HSC_-G-CSF	severe COVID-19 patient
toy	562	228	S1	ATGATCGTCTGCTCTG-1	Sample 1_nCoV 1 scRNA-seq [SW103]	GSM4509011	63	PBMC	M	COVID-19 patient	severe COVID-19 patient	9.60854	1911	359	HSC_-G-CSF	HSC_-G-CSF	severe COVID-19 patient
toy	7967	2275	S1	ATGCATGAGGGAGGGT-1	Sample 1_nCoV 1 scRNA-seq [SW103]	GSM4509011	63	PBMC	M	COVID-19 patient	severe COVID-19 patient	8.81135	2413	950	Classical monocytes	Monocytes	severe COVID-19 patient
toy	10352	2591	S1	ATGCATGGTCGGTACC-1	Sample 1_nCoV 1 scRNA-seq [SW103]	GSM4509011	63	PBMC	M	COVID-19 patient	severe COVID-19 patient	4.27937	2483	1011	Classical monocytes	Monocytes	severe COVID-19 patient
toy	5891	1859	S1	ATGCCTCAGCGCCTTG-1	Sample 1_nCoV 1 scRNA-seq [SW103]	GSM4509011	63	PBMC	M	COVID-19 patient	severe COVID-19 patient	8.35172	2980	1476	Non-Vd2 gd T cells	NK cells	severe COVID-19 patient
toy	4219	1601	S1	ATGCCTCAGGCCCACT-1	Sample 1_nCoV 1 scRNA-seq [SW103]	GSM4509011	63	PBMC	M	COVID-19 patient	severe COVID-19 patient	6.47073	2956	1567	Natural killer cells	NK cells	severe COVID-19 patient
toy	9602	2698	S1	ATGCCTCCACATGTTG-1	Sample 1_nCoV 1 scRNA-seq [SW103]	GSM4509011	63	PBMC	M	COVID-19 patient	severe COVID-19 patient	11.1643	2467	1036	Classical monocytes	Monocytes	severe COVID-19 patient
toy	3530	565	S1	ATGCCTCCATCAGCTA-1	Sample 1_nCoV 1 scRNA-seq [SW103]	GSM4509011	63	PBMC	M	COVID-19 patient	severe COVID-19 patient	2.91785	2774	542	Platelets	Platelets	severe COVID-19 patient
toy	578	269	S1	ATGCCTCGTCATCCGG-1	Sample 1_nCoV 1 scRNA-seq [SW103]	GSM4509011	63	PBMC	M	COVID-19 patient	severe COVID-19 patient	3.46021	1833	400	HSC_-G-CSF	HSC_-G-CSF	severe COVID-19 patient
toy	1189	597	S1	ATGCCTCGTCTTGCGG-1	Sample 1_nCoV 1 scRNA-seq [SW103]	GSM4509011	63	PBMC	M	COVID-19 patient	severe COVID-19 patient	4.54163	2147	659	Platelets	Platelets	severe COVID-19 patient
toy	492	247	S1	ATGCGATGTGTACGCC-1	Sample 1_nCoV 1 scRNA-seq [SW103]	GSM4509011	63	PBMC	M	COVID-19 patient	severe COVID-19 patient	5.0813	1838	391	HSC_-G-CSF	HSC_-G-CSF	severe COVID-19 patient
toy	4814	1570	S1	ATGCGATGTTCTCCAC-1	Sample 1_nCoV 1 scRNA-seq [SW103]	GSM4509011	63	PBMC	M	COVID-19 patient	severe COVID-19 patient	13.0661	2983	1467	Terminal effector CD8 T cells	T cells	severe COVID-19 patient
toy	8895	2014	S1	ATGCGATTCCTTACCG-1	Sample 1_nCoV 1 scRNA-seq [SW103]	GSM4509011	63	PBMC	M	COVID-19 patient	severe COVID-19 patient	3.55256	2382	695	Th2 cells	NA	severe COVID-19 patient
toy	6246	1953	S1	ATGCGATTCGCAGTCG-1	Sample 1_nCoV 1 scRNA-seq [SW103]	GSM4509011	63	PBMC	M	COVID-19 patient	severe COVID-19 patient	7.66891	2908	1452	Classical monocytes	Monocytes	severe COVID-19 patient
toy	516	278	S1	ATGGAGGCACACCGAC-1	Sample 1_nCoV 1 scRNA-seq [SW103]	GSM4509011	63	PBMC	M	COVID-19 patient	severe COVID-19 patient	12.5969	1849	397	NA	NA	severe COVID-19 patient
toy	3233	1110	S1	ATGGAGGGTCACGACC-1	Sample 1_nCoV 1 scRNA-seq [SW103]	GSM4509011	63	PBMC	M	COVID-19 patient	severe COVID-19 patient	0.525827	2709	1109	Classical monocytes	Monocytes	severe COVID-19 patient
toy	2791	893	S1	ATGGAGGTCTAGCCAA-1	Sample 1_nCoV 1 scRNA-seq [SW103]	GSM4509011	63	PBMC	M	COVID-19 patient	severe COVID-19 patient	2.54389	2576	893	Naive CD8 T cells	CD4+ T cells	severe COVID-19 patient
toy	3024	1062	S1	ATGGATCAGACTACCT-1	Sample 1_nCoV 1 scRNA-seq [SW103]	GSM4509011	63	PBMC	M	COVID-19 patient	severe COVID-19 patient	14.418	2657	1059	Th2 cells	CD4+ T cells	severe COVID-19 patient
toy	7578	2179	S1	ATGGATCCATAAGATG-1	Sample 1_nCoV 1 scRNA-seq [SW103]	GSM4509011	63	PBMC	M	COVID-19 patient	severe COVID-19 patient	6.34732	2428	957	Classical monocytes	Monocytes	severe COVID-19 patient
toy	6430	1822	S1	ATGGATCCATAGATCC-1	Sample 1_nCoV 1 scRNA-seq [SW103]	GSM4509011	63	PBMC	M	COVID-19 patient	severe COVID-19 patient	8.33593	2856	1273	Naive B cells	B cells	severe COVID-19 patient
toy	6917	1959	S1	ATGGATCGTACGCTAT-1	Sample 1_nCoV 1 scRNA-seq [SW103]	GSM4509011	63	PBMC	M	COVID-19 patient	severe COVID-19 patient	4.56845	2915	1124	Classical monocytes	Monocytes	severe COVID-19 patient
toy	2459	892	S1	ATGGATCGTACTAGCT-1	Sample 1_nCoV 1 scRNA-seq [SW103]	GSM4509011	63	PBMC	M	COVID-19 patient	severe COVID-19 patient	14.5588	2457	892	Naive CD4 T cells	CD4+ T cells	severe COVID-19 patient
toy	8878	2626	S1	ATGGATCGTCGTTGGC-1	Sample 1_nCoV 1 scRNA-seq [SW103]	GSM4509011	63	PBMC	M	COVID-19 patient	severe COVID-19 patient	6.99482	2400	1079	Classical monocytes	Monocytes	severe COVID-19 patient
toy	4038	1229	S1	ATGGATCGTTAAACCC-1	Sample 1_nCoV 1 scRNA-seq [SW103]	GSM4509011	63	PBMC	M	COVID-19 patient	severe COVID-19 patient	7.28083	2798	1207	Th1 cells	T cells	severe COVID-19 patient
toy	5458	1872	S1	ATGGATCTCACTGATG-1	Sample 1_nCoV 1 scRNA-seq [SW103]	GSM4509011	63	PBMC	M	COVID-19 patient	severe COVID-19 patient	7.43862	3058	1648	Classical monocytes	Monocytes	severe COVID-19 patient
toy	6660	1545	S1	ATGGATCTCGGTCACG-1	Sample 1_nCoV 1 scRNA-seq [SW103]	GSM4509011	63	PBMC	M	COVID-19 patient	severe COVID-19 patient	4.74474	2726	974	Naive CD4 T cells	CD4+ T cells	severe COVID-19 patient
toy	7098	2155	S1	ATGGATCTCTGGCCTT-1	Sample 1_nCoV 1 scRNA-seq [SW103]	GSM4509011	63	PBMC	M	COVID-19 patient	severe COVID-19 patient	12.3979	2636	1192	Classical monocytes	Monocytes	severe COVID-19 patient
toy	2869	1180	S1	ATGGATCTCTTGATTC-1	Sample 1_nCoV 1 scRNA-seq [SW103]	GSM4509011	63	PBMC	M	COVID-19 patient	severe COVID-19 patient	7.52876	2650	1180	Natural killer cells	NK cells	severe COVID-19 patient
toy	13873	3307	S1	ATGGGAGAGATAGCTA-1	Sample 1_nCoV 1 scRNA-seq [SW103]	GSM4509011	63	PBMC	M	COVID-19 patient	severe COVID-19 patient	6.26397	2589	1163	Classical monocytes	Monocytes	severe COVID-19 patient
toy	7886	1987	S1	ATGGGAGAGTAGTCTC-1	Sample 1_nCoV 1 scRNA-seq [SW103]	GSM4509011	63	PBMC	M	COVID-19 patient	severe COVID-19 patient	8.17905	2421	782	Non-switched memory B cells	B cells	severe COVID-19 patient
toy	1486	572	S1	ATGGGAGCACCGTACG-1	Sample 1_nCoV 1 scRNA-seq [SW103]	GSM4509011	63	PBMC	M	COVID-19 patient	severe COVID-19 patient	3.9031	2104	593	Platelets	Platelets	severe COVID-19 patient
toy	7358	1802	S1	ATGGGAGGTAGATGTA-1	Sample 1_nCoV 1 scRNA-seq [SW103]	GSM4509011	63	PBMC	M	COVID-19 patient	severe COVID-19 patient	11.4705	2487	802	Non-switched memory B cells	B cells	severe COVID-19 patient
toy	1495	561	S1	ATGGGAGGTGCCCACA-1	Sample 1_nCoV 1 scRNA-seq [SW103]	GSM4509011	63	PBMC	M	COVID-19 patient	severe COVID-19 patient	3.47826	2116	592	Platelets	Platelets	severe COVID-19 patient
toy	7534	1678	S1	ATGGGTTCAACAGTGG-1	Sample 1_nCoV 1 scRNA-seq [SW103]	GSM4509011	63	PBMC	M	COVID-19 patient	severe COVID-19 patient	4.38014	2453	706	Naive CD4 T cells	CD4+ T cells	severe COVID-19 patient
toy	4663	1433	S1	ATGGGTTGTCCAGCCA-1	Sample 1_nCoV 1 scRNA-seq [SW103]	GSM4509011	63	PBMC	M	COVID-19 patient	severe COVID-19 patient	6.36929	2940	1365	Naive B cells	B cells	severe COVID-19 patient
toy	3229	1281	S1	ATGGGTTGTCTGATAC-1	Sample 1_nCoV 1 scRNA-seq [SW103]	GSM4509011	63	PBMC	M	COVID-19 patient	severe COVID-19 patient	9.13596	2753	1281	Classical monocytes	Monocytes	severe COVID-19 patient
toy	2120	949	S1	ATGGGTTGTTACCCAA-1	Sample 1_nCoV 1 scRNA-seq [SW103]	GSM4509011	63	PBMC	M	COVID-19 patient	severe COVID-19 patient	14.9057	2273	947	Low-density neutrophils	Neutrophils	severe COVID-19 patient
toy	11290	3083	S1	ATGGGTTTCATTATCC-1	Sample 1_nCoV 1 scRNA-seq [SW103]	GSM4509011	63	PBMC	M	COVID-19 patient	severe COVID-19 patient	9.20283	2531	1160	Effector memory CD8 T cells	T cells	severe COVID-19 patient
toy	789	260	S1	ATGGGTTTCGTAACAC-1	Sample 1_nCoV 1 scRNA-seq [SW103]	GSM4509011	63	PBMC	M	COVID-19 patient	severe COVID-19 patient	14.7022	2028	353	Platelets	Platelets	severe COVID-19 patient
toy	681	229	S1	ATGGTTGAGCAATAGT-1	Sample 1_nCoV 1 scRNA-seq [SW103]	GSM4509011	63	PBMC	M	COVID-19 patient	severe COVID-19 patient	3.67107	1782	330	Intermediate monocytes	NA	severe COVID-19 patient
toy	7158	2043	S1	ATGGTTGAGTTGGAAT-1	Sample 1_nCoV 1 scRNA-seq [SW103]	GSM4509011	63	PBMC	M	COVID-19 patient	severe COVID-19 patient	15.563	2545	1039	Myeloid dendritic cells	Dendritic cells	severe COVID-19 patient
toy	579	256	S1	ATGGTTGTCAGAATAG-1	Sample 1_nCoV 1 scRNA-seq [SW103]	GSM4509011	63	PBMC	M	COVID-19 patient	severe COVID-19 patient	5.69948	1895	372	HSC_-G-CSF	HSC_-G-CSF	severe COVID-19 patient
toy	14566	3434	S1	ATGGTTGTCGGATTAC-1	Sample 1_nCoV 1 scRNA-seq [SW103]	GSM4509011	63	PBMC	M	COVID-19 patient	severe COVID-19 patient	7.21543	2631	1265	Classical monocytes	Monocytes	severe COVID-19 patient
toy	1087	382	S1	ATGTCCCAGTTACGGG-1	Sample 1_nCoV 1 scRNA-seq [SW103]	GSM4509011	63	PBMC	M	COVID-19 patient	severe COVID-19 patient	8.83165	2165	458	Platelets	Platelets	severe COVID-19 patient
toy	682	311	S1	ATGTCCCCACACGCCA-1	Sample 1_nCoV 1 scRNA-seq [SW103]	GSM4509011	63	PBMC	M	COVID-19 patient	severe COVID-19 patient	9.67742	1945	399	HSC_-G-CSF	HSC_-G-CSF	severe COVID-19 patient
toy	18020	3702	S1	ATGTCTTCATGGCTGC-1	Sample 1_nCoV 1 scRNA-seq [SW103]	GSM4509011	63	PBMC	M	COVID-19 patient	severe COVID-19 patient	5.4606	2586	1149	Classical monocytes	Monocytes	severe COVID-19 patient
toy	9223	1994	S1	ATGTCTTGTTCTCCCA-1	Sample 1_nCoV 1 scRNA-seq [SW103]	GSM4509011	63	PBMC	M	COVID-19 patient	severe COVID-19 patient	4.22856	2352	615	Naive CD4 T cells	CD4+ T cells	severe COVID-19 patient
toy	8691	2460	S1	ATGTCTTTCTCGGGAC-1	Sample 1_nCoV 1 scRNA-seq [SW103]	GSM4509011	63	PBMC	M	COVID-19 patient	severe COVID-19 patient	9.73421	2385	930	Intermediate monocytes	Monocytes	severe COVID-19 patient
toy	5177	1819	S1	ATTACCTAGAAATGGG-1	Sample 1_nCoV 1 scRNA-seq [SW103]	GSM4509011	63	PBMC	M	COVID-19 patient	severe COVID-19 patient	8.67298	3029	1661	Classical monocytes	Monocytes	severe COVID-19 patient
toy	6305	1954	S1	ATTACCTAGCATTTCG-1	Sample 1_nCoV 1 scRNA-seq [SW103]	GSM4509011	63	PBMC	M	COVID-19 patient	severe COVID-19 patient	11.6574	2936	1436	Vd2 gd T cells	T cells	severe COVID-19 patient
toy	4171	1580	S1	ATTACCTAGTATGACA-1	Sample 1_nCoV 1 scRNA-seq [SW103]	GSM4509011	63	PBMC	M	COVID-19 patient	severe COVID-19 patient	8.19947	2886	1567	Classical monocytes	Monocytes	severe COVID-19 patient
toy	5247	1540	S1	ATTACCTGTATCCCAA-1	Sample 1_nCoV 1 scRNA-seq [SW103]	GSM4509011	63	PBMC	M	COVID-19 patient	severe COVID-19 patient	6.44178	2982	1376	Naive B cells	B cells	severe COVID-19 patient
toy	957	339	S1	ATTACCTGTCGTTGGC-1	Sample 1_nCoV 1 scRNA-seq [SW103]	GSM4509011	63	PBMC	M	COVID-19 patient	severe COVID-19 patient	12.2257	2111	410	HSC_-G-CSF	HSC_-G-CSF	severe COVID-19 patient
toy	11423	2901	S1	ATTACCTGTGAGTAAT-1	Sample 1_nCoV 1 scRNA-seq [SW103]	GSM4509011	63	PBMC	M	COVID-19 patient	severe COVID-19 patient	7.44988	2570	1113	Effector memory CD8 T cells	T cells	severe COVID-19 patient
toy	546	211	S1	ATTACCTTCCGCTTAC-1	Sample 1_nCoV 1 scRNA-seq [SW103]	GSM4509011	63	PBMC	M	COVID-19 patient	severe COVID-19 patient	15.0183	1936	341	Myeloid dendritic cells	NA	severe COVID-19 patient
toy	592	331	S1	ATTACCTTCGAGAATA-1	Sample 1_nCoV 1 scRNA-seq [SW103]	GSM4509011	63	PBMC	M	COVID-19 patient	severe COVID-19 patient	5.40541	1833	448	Platelets	Platelets	severe COVID-19 patient
toy	651	279	S1	ATTACCTTCGGCATCG-1	Sample 1_nCoV 1 scRNA-seq [SW103]	GSM4509011	63	PBMC	M	COVID-19 patient	severe COVID-19 patient	1.84332	1918	395	HSC_-G-CSF	HSC_-G-CSF	severe COVID-19 patient
toy	12430	3079	S1	ATTACTCAGAAGAGCA-1	Sample 1_nCoV 1 scRNA-seq [SW103]	GSM4509011	63	PBMC	M	COVID-19 patient	severe COVID-19 patient	6.03379	2625	1135	Intermediate monocytes	Monocytes	severe COVID-19 patient
toy	583	359	S1	ATTACTCAGAGGGCGA-1	Sample 1_nCoV 1 scRNA-seq [SW103]	GSM4509011	63	PBMC	M	COVID-19 patient	severe COVID-19 patient	9.94854	1876	436	Myeloid dendritic cells	NA	severe COVID-19 patient
toy	495	295	S1	ATTACTCAGGAACATT-1	Sample 1_nCoV 1 scRNA-seq [SW103]	GSM4509011	63	PBMC	M	COVID-19 patient	severe COVID-19 patient	2.62626	1887	385	NA	NA	severe COVID-19 patient
toy	2101	1045	S1	ATTACTCAGTTACGAA-1	Sample 1_nCoV 1 scRNA-seq [SW103]	GSM4509011	63	PBMC	M	COVID-19 patient	severe COVID-19 patient	5.52118	2262	1045	NA	NA	severe COVID-19 patient
toy	13695	3327	S1	ATTACTCCACTAGGTT-1	Sample 1_nCoV 1 scRNA-seq [SW103]	GSM4509011	63	PBMC	M	COVID-19 patient	severe COVID-19 patient	4.87769	2555	1173	Classical monocytes	Monocytes	severe COVID-19 patient
toy	3362	211	S1	ATTACTCCAGCGACCT-1	Sample 1_nCoV 1 scRNA-seq [SW103]	GSM4509011	63	PBMC	M	COVID-19 patient	severe COVID-19 patient	0.267698	2736	196	Erythroblast	Erythroblast	severe COVID-19 patient
toy	3104	1200	S1	ATTACTCCATTCGGGC-1	Sample 1_nCoV 1 scRNA-seq [SW103]	GSM4509011	63	PBMC	M	COVID-19 patient	severe COVID-19 patient	15.0129	2720	1200	Classical monocytes	Monocytes	severe COVID-19 patient
toy	7639	1722	S1	ATTACTCTCGCAGATT-1	Sample 1_nCoV 1 scRNA-seq [SW103]	GSM4509011	63	PBMC	M	COVID-19 patient	severe COVID-19 patient	5.38029	2452	703	Th1/Th17 cells	CD4+ T cells	severe COVID-19 patient
toy	596	284	S1	ATTATCCCAATATCCG-1	Sample 1_nCoV 1 scRNA-seq [SW103]	GSM4509011	63	PBMC	M	COVID-19 patient	severe COVID-19 patient	8.05369	1859	417	HSC_-G-CSF	HSC_-G-CSF	severe COVID-19 patient
toy	10565	2758	S1	ATTATCCCAGAACTAA-1	Sample 1_nCoV 1 scRNA-seq [SW103]	GSM4509011	63	PBMC	M	COVID-19 patient	severe COVID-19 patient	8.13062	2529	1059	Central memory CD8 T cells	CD8+ T cells	severe COVID-19 patient
toy	6407	1889	S1	ATTATCCCATCATTTC-1	Sample 1_nCoV 1 scRNA-seq [SW103]	GSM4509011	63	PBMC	M	COVID-19 patient	severe COVID-19 patient	7.49181	2873	1318	T regulatory cells	CD4+ T cells	severe COVID-19 patient
toy	601	383	S1	ATTATCCGTCGAACGA-1	Sample 1_nCoV 1 scRNA-seq [SW103]	GSM4509011	63	PBMC	M	COVID-19 patient	severe COVID-19 patient	5.65724	1859	465	NA	NA	severe COVID-19 patient
toy	10772	2975	S1	ATTATCCTCTGCTAGA-1	Sample 1_nCoV 1 scRNA-seq [SW103]	GSM4509011	63	PBMC	M	COVID-19 patient	severe COVID-19 patient	7.1853	2510	1136	Classical monocytes	Monocytes	severe COVID-19 patient
toy	521	280	S1	ATTCACTAGGGCGAGA-1	Sample 1_nCoV 1 scRNA-seq [SW103]	GSM4509011	63	PBMC	M	COVID-19 patient	severe COVID-19 patient	10.3647	1800	419	HSC_-G-CSF	HSC_-G-CSF	severe COVID-19 patient
toy	11385	3003	S1	ATTCACTCAAAGGCAC-1	Sample 1_nCoV 1 scRNA-seq [SW103]	GSM4509011	63	PBMC	M	COVID-19 patient	severe COVID-19 patient	6.30654	2547	1167	Classical monocytes	Monocytes	severe COVID-19 patient
toy	15037	1073	S1	ATTCACTCAAGTAGTA-1	Sample 1_nCoV 1 scRNA-seq [SW103]	GSM4509011	63	PBMC	M	COVID-19 patient	severe COVID-19 patient	2.14138	3644	307	Erythroblast	Erythroblast	severe COVID-19 patient
toy	6712	297	S1	ATTCACTCATCAGTGT-1	Sample 1_nCoV 1 scRNA-seq [SW103]	GSM4509011	63	PBMC	M	COVID-19 patient	severe COVID-19 patient	0.640644	3253	142	Erythroblast	Erythroblast	severe COVID-19 patient
toy	7587	1885	S1	ATTCACTTCAGCAATC-1	Sample 1_nCoV 1 scRNA-seq [SW103]	GSM4509011	63	PBMC	M	COVID-19 patient	severe COVID-19 patient	9.7008	2430	768	Naive B cells	B cells	severe COVID-19 patient
toy	1185	389	S1	ATTCAGGAGGCTCACC-1	Sample 1_nCoV 1 scRNA-seq [SW103]	GSM4509011	63	PBMC	M	COVID-19 patient	severe COVID-19 patient	7.34177	2228	442	Platelets	Platelets	severe COVID-19 patient
toy	5275	1539	S1	ATTCAGGAGTGGATAT-1	Sample 1_nCoV 1 scRNA-seq [SW103]	GSM4509011	63	PBMC	M	COVID-19 patient	severe COVID-19 patient	7.01422	2961	1347	Naive B cells	B cells	severe COVID-19 patient
toy	4505	1546	S1	ATTCAGGCACAGCCAC-1	Sample 1_nCoV 1 scRNA-seq [SW103]	GSM4509011	63	PBMC	M	COVID-19 patient	severe COVID-19 patient	5.4384	2961	1513	Naive B cells	B cells	severe COVID-19 patient
toy	9075	2725	S1	ATTCAGGCACCCAATA-1	Sample 1_nCoV 1 scRNA-seq [SW103]	GSM4509011	63	PBMC	M	COVID-19 patient	severe COVID-19 patient	8.84848	2374	1034	Classical monocytes	Monocytes	severe COVID-19 patient
toy	537	276	S1	ATTCAGGCAGTACTAC-1	Sample 1_nCoV 1 scRNA-seq [SW103]	GSM4509011	63	PBMC	M	COVID-19 patient	severe COVID-19 patient	3.16574	1819	406	HSC_-G-CSF	HSC_-G-CSF	severe COVID-19 patient
toy	9558	2667	S1	ATTCAGGTCGTGTCAA-1	Sample 1_nCoV 1 scRNA-seq [SW103]	GSM4509011	63	PBMC	M	COVID-19 patient	severe COVID-19 patient	5.39862	2440	1055	Classical monocytes	Monocytes	severe COVID-19 patient
toy	9817	2634	S1	ATTCAGGTCTTGCAGA-1	Sample 1_nCoV 1 scRNA-seq [SW103]	GSM4509011	63	PBMC	M	COVID-19 patient	severe COVID-19 patient	9.17796	2520	1054	Classical monocytes	Monocytes	severe COVID-19 patient
toy	1555	853	S1	ATTCATCAGAGTGTTA-1	Sample 1_nCoV 1 scRNA-seq [SW103]	GSM4509011	63	PBMC	M	COVID-19 patient	severe COVID-19 patient	7.20257	2064	853	Classical monocytes	Monocytes	severe COVID-19 patient
toy	8574	1586	S1	ATTCATCAGCACAAAT-1	Sample 1_nCoV 1 scRNA-seq [SW103]	GSM4509011	63	PBMC	M	COVID-19 patient	severe COVID-19 patient	4.66527	2630	527	Naive B cells	B cells	severe COVID-19 patient
toy	716	309	S1	ATTCATCCAAGGCCTC-1	Sample 1_nCoV 1 scRNA-seq [SW103]	GSM4509011	63	PBMC	M	COVID-19 patient	severe COVID-19 patient	4.60894	1932	414	HSC_-G-CSF	HSC_-G-CSF	severe COVID-19 patient
toy	1186	616	S1	ATTCATCGTACACTCA-1	Sample 1_nCoV 1 scRNA-seq [SW103]	GSM4509011	63	PBMC	M	COVID-19 patient	severe COVID-19 patient	16.7791	2295	625	Classical monocytes	Monocytes	severe COVID-19 patient
toy	16285	3346	S1	ATTCATCGTAGCCAGA-1	Sample 1_nCoV 1 scRNA-seq [SW103]	GSM4509011	63	PBMC	M	COVID-19 patient	severe COVID-19 patient	9.65305	2516	964	Classical monocytes	Monocytes	severe COVID-19 patient
toy	22060	4384	S1	ATTCATCGTCTTGTCC-1	Sample 1_nCoV 1 scRNA-seq [SW103]	GSM4509011	63	PBMC	M	COVID-19 patient	severe COVID-19 patient	5.88395	2465	1126	Classical monocytes	Monocytes	severe COVID-19 patient
toy	737	327	S1	ATTCATCGTTGCTAGT-1	Sample 1_nCoV 1 scRNA-seq [SW103]	GSM4509011	63	PBMC	M	COVID-19 patient	severe COVID-19 patient	5.83446	1947	429	HSC_-G-CSF	HSC_-G-CSF	severe COVID-19 patient
toy	1227	642	S1	ATTCATCTCTGGGAGA-1	Sample 1_nCoV 1 scRNA-seq [SW103]	GSM4509011	63	PBMC	M	COVID-19 patient	severe COVID-19 patient	15.7294	2126	655	Natural killer cells	NK cells	severe COVID-19 patient
toy	1205	475	S1	ATTCCATAGACGGTTG-1	Sample 1_nCoV 1 scRNA-seq [SW103]	GSM4509011	63	PBMC	M	COVID-19 patient	severe COVID-19 patient	6.30705	2161	523	Platelets	Platelets	severe COVID-19 patient
toy	13612	3045	S1	ATTCCATCAAGCCATT-1	Sample 1_nCoV 1 scRNA-seq [SW103]	GSM4509011	63	PBMC	M	COVID-19 patient	severe COVID-19 patient	6.3253	2825	1008	Classical monocytes	Monocytes	severe COVID-19 patient
toy	3530	1358	S1	ATTCCATGTACCTATG-1	Sample 1_nCoV 1 scRNA-seq [SW103]	GSM4509011	63	PBMC	M	COVID-19 patient	severe COVID-19 patient	11.1898	2830	1355	Classical monocytes	Monocytes	severe COVID-19 patient
toy	15839	3164	S1	ATTCCATGTACGATTC-1	Sample 1_nCoV 1 scRNA-seq [SW103]	GSM4509011	63	PBMC	M	COVID-19 patient	severe COVID-19 patient	6.08624	2506	901	Switched memory B cells	B cells	severe COVID-19 patient
toy	12173	3142	S1	ATTCCATGTCCCTGAG-1	Sample 1_nCoV 1 scRNA-seq [SW103]	GSM4509011	63	PBMC	M	COVID-19 patient	severe COVID-19 patient	6.32547	2597	1206	Classical monocytes	Monocytes	severe COVID-19 patient
toy	18921	3823	S1	ATTCCATTCCAACCGG-1	Sample 1_nCoV 1 scRNA-seq [SW103]	GSM4509011	63	PBMC	M	COVID-19 patient	severe COVID-19 patient	5.28513	2523	1082	Classical monocytes	Monocytes	severe COVID-19 patient
toy	5900	1801	S1	ATTCCATTCCAGCCTT-1	Sample 1_nCoV 1 scRNA-seq [SW103]	GSM4509011	63	PBMC	M	COVID-19 patient	severe COVID-19 patient	5.50847	2994	1442	Naive B cells	B cells	severe COVID-19 patient
toy	15808	3655	S1	ATTCCCGAGCAGAAAG-1	Sample 1_nCoV 1 scRNA-seq [SW103]	GSM4509011	63	PBMC	M	COVID-19 patient	severe COVID-19 patient	4.09919	2557	1209	Classical monocytes	Monocytes	severe COVID-19 patient
toy	646	363	S1	ATTCCTAAGCGACTGA-1	Sample 1_nCoV 1 scRNA-seq [SW103]	GSM4509011	63	PBMC	M	COVID-19 patient	severe COVID-19 patient	0.928793	1810	487	HSC_-G-CSF	HSC_-G-CSF	severe COVID-19 patient
toy	1717	838	S1	ATTCCTACAAACTCGT-1	Sample 1_nCoV 1 scRNA-seq [SW103]	GSM4509011	63	PBMC	M	COVID-19 patient	severe COVID-19 patient	7.16366	2129	838	Effector memory CD8 T cells	T cells	severe COVID-19 patient
toy	12101	3338	S1	ATTCCTACAATCGCAT-1	Sample 1_nCoV 1 scRNA-seq [SW103]	GSM4509011	63	PBMC	M	COVID-19 patient	severe COVID-19 patient	7.85059	2540	1245	Classical monocytes	Monocytes	severe COVID-19 patient
toy	11921	3038	S1	ATTCCTAGTCCCTGTT-1	Sample 1_nCoV 1 scRNA-seq [SW103]	GSM4509011	63	PBMC	M	COVID-19 patient	severe COVID-19 patient	4.79826	2503	1102	Classical monocytes	Monocytes	severe COVID-19 patient
toy	7535	1808	S1	ATTCCTAGTGACTGTT-1	Sample 1_nCoV 1 scRNA-seq [SW103]	GSM4509011	63	PBMC	M	COVID-19 patient	severe COVID-19 patient	6.23756	2451	762	Naive CD4 T cells	CD4+ T cells	severe COVID-19 patient
toy	663	312	S1	ATTCCTAGTGTGTACT-1	Sample 1_nCoV 1 scRNA-seq [SW103]	GSM4509011	63	PBMC	M	COVID-19 patient	severe COVID-19 patient	2.26244	1879	436	Platelets	Platelets	severe COVID-19 patient
toy	494	333	S1	ATTCCTATCACGGTCA-1	Sample 1_nCoV 1 scRNA-seq [SW103]	GSM4509011	63	PBMC	M	COVID-19 patient	severe COVID-19 patient	6.2753	1836	433	NA	NA	severe COVID-19 patient
toy	20780	4172	S1	ATTCCTATCACGGTCG-1	Sample 1_nCoV 1 scRNA-seq [SW103]	GSM4509011	63	PBMC	M	COVID-19 patient	severe COVID-19 patient	6.31858	2483	1097	Classical monocytes	Monocytes	severe COVID-19 patient
toy	6815	1693	S1	ATTCGTTAGACTCTAC-1	Sample 1_nCoV 1 scRNA-seq [SW103]	GSM4509011	63	PBMC	M	COVID-19 patient	severe COVID-19 patient	5.50257	2696	996	Switched memory B cells	B cells	severe COVID-19 patient
toy	7679	2402	S1	ATTCGTTAGCTCTGTA-1	Sample 1_nCoV 1 scRNA-seq [SW103]	GSM4509011	63	PBMC	M	COVID-19 patient	severe COVID-19 patient	9.33715	2453	1108	Classical monocytes	Monocytes	severe COVID-19 patient
toy	3313	1041	S1	ATTCGTTTCGCGTGCA-1	Sample 1_nCoV 1 scRNA-seq [SW103]	GSM4509011	63	PBMC	M	COVID-19 patient	severe COVID-19 patient	4.64835	2752	1033	Platelets	Platelets	severe COVID-19 patient
toy	8186	2114	S1	ATTCGTTTCTCATTTG-1	Sample 1_nCoV 1 scRNA-seq [SW103]	GSM4509011	63	PBMC	M	COVID-19 patient	severe COVID-19 patient	6.01026	2374	764	Switched memory B cells	B cells	severe COVID-19 patient
toy	6054	1603	S1	ATTCTACAGAGGACTC-1	Sample 1_nCoV 1 scRNA-seq [SW103]	GSM4509011	63	PBMC	M	COVID-19 patient	severe COVID-19 patient	4.74067	2833	1178	Th2 cells	CD4+ T cells	severe COVID-19 patient
toy	2460	210	S1	ATTCTACAGGCCACTC-1	Sample 1_nCoV 1 scRNA-seq [SW103]	GSM4509011	63	PBMC	M	COVID-19 patient	severe COVID-19 patient	4.5122	2453	210	Erythroblast	Erythroblast	severe COVID-19 patient
toy	8496	2183	S1	ATTCTTGAGAACTGAT-1	Sample 1_nCoV 1 scRNA-seq [SW103]	GSM4509011	63	PBMC	M	COVID-19 patient	severe COVID-19 patient	5.48493	2393	821	Follicular helper T cells	CD4+ T cells	severe COVID-19 patient
toy	8933	2574	S1	ATTCTTGAGCGTACAG-1	Sample 1_nCoV 1 scRNA-seq [SW103]	GSM4509011	63	PBMC	M	COVID-19 patient	severe COVID-19 patient	5.89947	2455	1086	Classical monocytes	Monocytes	severe COVID-19 patient
toy	10857	3031	S1	ATTCTTGAGGATACAT-1	Sample 1_nCoV 1 scRNA-seq [SW103]	GSM4509011	63	PBMC	M	COVID-19 patient	severe COVID-19 patient	7.61721	2534	1193	Classical monocytes	Monocytes	severe COVID-19 patient
toy	827	329	S1	ATTCTTGAGTGCAGGT-1	Sample 1_nCoV 1 scRNA-seq [SW103]	GSM4509011	63	PBMC	M	COVID-19 patient	severe COVID-19 patient	18.6215	2013	417	Platelets	Platelets	severe COVID-19 patient
toy	3742	1427	S1	ATTCTTGCAACCAATC-1	Sample 1_nCoV 1 scRNA-seq [SW103]	GSM4509011	63	PBMC	M	COVID-19 patient	severe COVID-19 patient	6.46713	2864	1424	Natural killer cells	NK cells	severe COVID-19 patient
toy	5778	636	S1	ATTGGGTAGCAGCAGT-1	Sample 1_nCoV 1 scRNA-seq [SW103]	GSM4509011	63	PBMC	M	COVID-19 patient	severe COVID-19 patient	2.64798	3185	476	Erythroblast	Erythroblast	severe COVID-19 patient
toy	4501	1365	S1	ATTGGGTAGGCAGCTA-1	Sample 1_nCoV 1 scRNA-seq [SW103]	GSM4509011	63	PBMC	M	COVID-19 patient	severe COVID-19 patient	6.17641	2923	1326	Naive B cells	B cells	severe COVID-19 patient
toy	8210	2515	S1	ATTGGGTCACGAAAGC-1	Sample 1_nCoV 1 scRNA-seq [SW103]	GSM4509011	63	PBMC	M	COVID-19 patient	severe COVID-19 patient	5.3715	2387	1028	Classical monocytes	Monocytes	severe COVID-19 patient
toy	1806	385	S1	ATTGGGTCACTCTCGT-1	Sample 1_nCoV 1 scRNA-seq [SW103]	GSM4509011	63	PBMC	M	COVID-19 patient	severe COVID-19 patient	13.2337	2162	385	Plasmablasts	B cells	severe COVID-19 patient
toy	6747	1566	S1	ATTGGGTCAGTAACCT-1	Sample 1_nCoV 1 scRNA-seq [SW103]	GSM4509011	63	PBMC	M	COVID-19 patient	severe COVID-19 patient	8.4482	2719	968	Naive CD8 T cells	CD8+ T cells	severe COVID-19 patient
toy	8427	2582	S1	ATTGGGTGTCTGTGCG-1	Sample 1_nCoV 1 scRNA-seq [SW103]	GSM4509011	63	PBMC	M	COVID-19 patient	severe COVID-19 patient	8.9949	2403	1042	Classical monocytes	Monocytes	severe COVID-19 patient
toy	4771	1344	S1	ATTGGGTGTTGCGGAA-1	Sample 1_nCoV 1 scRNA-seq [SW103]	GSM4509011	63	PBMC	M	COVID-19 patient	severe COVID-19 patient	7.12639	2923	1264	Naive B cells	B cells	severe COVID-19 patient
toy	3492	998	S1	ATTGGGTGTTGGATCT-1	Sample 1_nCoV 1 scRNA-seq [SW103]	GSM4509011	63	PBMC	M	COVID-19 patient	severe COVID-19 patient	12.6861	2732	996	Naive B cells	B cells	severe COVID-19 patient
toy	1292	441	S1	ATTGGGTTCGAAGCAG-1	Sample 1_nCoV 1 scRNA-seq [SW103]	GSM4509011	63	PBMC	M	COVID-19 patient	severe COVID-19 patient	5.26316	2138	489	Platelets	Platelets	severe COVID-19 patient
toy	681	317	S1	ATTGTTCAGTCATGGG-1	Sample 1_nCoV 1 scRNA-seq [SW103]	GSM4509011	63	PBMC	M	COVID-19 patient	severe COVID-19 patient	10.7195	1941	412	NA	NA	severe COVID-19 patient
toy	15399	3718	S1	ATTGTTCCAGGTCAGA-1	Sample 1_nCoV 1 scRNA-seq [SW103]	GSM4509011	63	PBMC	M	COVID-19 patient	severe COVID-19 patient	8.83824	2571	1237	Classical monocytes	Monocytes	severe COVID-19 patient
toy	3869	1374	S1	ATTGTTCGTGTTCGAT-1	Sample 1_nCoV 1 scRNA-seq [SW103]	GSM4509011	63	PBMC	M	COVID-19 patient	severe COVID-19 patient	12.7423	2864	1361	Vd2 gd T cells	T cells	severe COVID-19 patient
toy	3267	1416	S1	ATTGTTCTCAGACCGC-1	Sample 1_nCoV 1 scRNA-seq [SW103]	GSM4509011	63	PBMC	M	COVID-19 patient	severe COVID-19 patient	10.0092	2796	1416	Classical monocytes	Monocytes	severe COVID-19 patient
toy	8921	2163	S1	ATTTACCAGATGTTCC-1	Sample 1_nCoV 1 scRNA-seq [SW103]	GSM4509011	63	PBMC	M	COVID-19 patient	severe COVID-19 patient	6.09797	2341	705	Th1/Th17 cells	CD8+ T cells	severe COVID-19 patient
toy	12466	3290	S1	ATTTACCCAAGCCTGC-1	Sample 1_nCoV 1 scRNA-seq [SW103]	GSM4509011	63	PBMC	M	COVID-19 patient	severe COVID-19 patient	5.50297	2585	1248	Classical monocytes	Monocytes	severe COVID-19 patient
toy	9000	2181	S1	ATTTACCCAGACATCT-1	Sample 1_nCoV 1 scRNA-seq [SW103]	GSM4509011	63	PBMC	M	COVID-19 patient	severe COVID-19 patient	3.7	2398	811	Th1 cells	CD4+ T cells	severe COVID-19 patient
toy	9819	2060	S1	ATTTACCCAGCGGTCT-1	Sample 1_nCoV 1 scRNA-seq [SW103]	GSM4509011	63	PBMC	M	COVID-19 patient	severe COVID-19 patient	4.04318	2367	630	Central memory CD8 T cells	CD8+ T cells	severe COVID-19 patient
toy	1401	701	S1	ATTTACCCATTCATCT-1	Sample 1_nCoV 1 scRNA-seq [SW103]	GSM4509011	63	PBMC	M	COVID-19 patient	severe COVID-19 patient	10.1356	2063	709	NA	NA	severe COVID-19 patient
toy	3883	1381	S1	ATTTACCGTTCCGGTG-1	Sample 1_nCoV 1 scRNA-seq [SW103]	GSM4509011	63	PBMC	M	COVID-19 patient	severe COVID-19 patient	9.47721	2823	1370	Classical monocytes	Monocytes	severe COVID-19 patient
toy	8717	2729	S1	ATTTCACCATTGTCGA-1	Sample 1_nCoV 1 scRNA-seq [SW103]	GSM4509011	63	PBMC	M	COVID-19 patient	severe COVID-19 patient	13.1811	2400	1016	Natural killer cells	T cells	severe COVID-19 patient
toy	4601	1817	S1	ATTTCACGTAGCGAGT-1	Sample 1_nCoV 1 scRNA-seq [SW103]	GSM4509011	63	PBMC	M	COVID-19 patient	severe COVID-19 patient	13.6492	3074	1770	Natural killer cells	NA	severe COVID-19 patient
toy	7550	1724	S1	ATTTCACGTCGCATCG-1	Sample 1_nCoV 1 scRNA-seq [SW103]	GSM4509011	63	PBMC	M	COVID-19 patient	severe COVID-19 patient	7.28477	2503	747	Non-switched memory B cells	B cells	severe COVID-19 patient
toy	5271	1446	S1	ATTTCACGTGTATACC-1	Sample 1_nCoV 1 scRNA-seq [SW103]	GSM4509011	63	PBMC	M	COVID-19 patient	severe COVID-19 patient	4.32555	2914	1271	Non-switched memory B cells	B cells	severe COVID-19 patient
toy	634	278	S1	ATTTCTGAGCTACTGT-1	Sample 1_nCoV 1 scRNA-seq [SW103]	GSM4509011	63	PBMC	M	COVID-19 patient	severe COVID-19 patient	8.99054	1915	391	HSC_-G-CSF	HSC_-G-CSF	severe COVID-19 patient
toy	5383	1947	S1	ATTTCTGCAATTTCGG-1	Sample 1_nCoV 1 scRNA-seq [SW103]	GSM4509011	63	PBMC	M	COVID-19 patient	severe COVID-19 patient	3.99406	3085	1745	Classical monocytes	Monocytes	severe COVID-19 patient
toy	13636	3276	S1	ATTTCTGGTGTACGCC-1	Sample 1_nCoV 1 scRNA-seq [SW103]	GSM4509011	63	PBMC	M	COVID-19 patient	severe COVID-19 patient	5.74215	2586	1204	Classical monocytes	Monocytes	severe COVID-19 patient
toy	8139	2465	S1	CAAAGAAAGCTACGTT-1	Sample 1_nCoV 1 scRNA-seq [SW103]	GSM4509011	63	PBMC	M	COVID-19 patient	severe COVID-19 patient	4.47229	2448	1070	Effector memory CD8 T cells	CD8+ T cells	severe COVID-19 patient
toy	5019	1774	S1	CAAAGAAGTTCTCGCT-1	Sample 1_nCoV 1 scRNA-seq [SW103]	GSM4509011	63	PBMC	M	COVID-19 patient	severe COVID-19 patient	8.84638	3041	1652	Classical monocytes	Monocytes	severe COVID-19 patient
toy	1837	844	S1	CAAAGAATCATAGGCT-1	Sample 1_nCoV 1 scRNA-seq [SW103]	GSM4509011	63	PBMC	M	COVID-19 patient	severe COVID-19 patient	18.5084	2147	842	Platelets	Platelets	severe COVID-19 patient
toy	5730	1569	S1	CAACAACAGCTGGCCT-1	Sample 1_nCoV 1 scRNA-seq [SW103]	GSM4509011	63	PBMC	M	COVID-19 patient	severe COVID-19 patient	4.34555	2925	1276	Central memory CD8 T cells	CD8+ T cells	severe COVID-19 patient
toy	1209	629	S1	CAACAACAGTCTAGCT-1	Sample 1_nCoV 1 scRNA-seq [SW103]	GSM4509011	63	PBMC	M	COVID-19 patient	severe COVID-19 patient	11.9934	2206	660	Classical monocytes	Monocytes	severe COVID-19 patient
toy	3720	1221	S1	CAACAACCAGCGAGTA-1	Sample 1_nCoV 1 scRNA-seq [SW103]	GSM4509011	63	PBMC	M	COVID-19 patient	severe COVID-19 patient	16.3172	2826	1213	Non-Vd2 gd T cells	T cells	severe COVID-19 patient
toy	4636	1329	S1	CAACAACCATAGAGGC-1	Sample 1_nCoV 1 scRNA-seq [SW103]	GSM4509011	63	PBMC	M	COVID-19 patient	severe COVID-19 patient	8.00259	2913	1267	Naive B cells	B cells	severe COVID-19 patient
toy	6124	1535	S1	CAACAACGTCGATTAC-1	Sample 1_nCoV 1 scRNA-seq [SW103]	GSM4509011	63	PBMC	M	COVID-19 patient	severe COVID-19 patient	4.89876	2819	1126	Th17 cells	CD4+ T cells	severe COVID-19 patient
toy	487	247	S1	CAACAACGTGCCTACG-1	Sample 1_nCoV 1 scRNA-seq [SW103]	GSM4509011	63	PBMC	M	COVID-19 patient	severe COVID-19 patient	9.44559	1848	389	HSC_-G-CSF	HSC_-G-CSF	severe COVID-19 patient
toy	9883	1832	S1	CAACAACTCCATTCGC-1	Sample 1_nCoV 1 scRNA-seq [SW103]	GSM4509011	63	PBMC	M	COVID-19 patient	severe COVID-19 patient	3.5212	2585	525	Th2 cells	CD4+ T cells	severe COVID-19 patient
toy	14852	3424	S1	CAACAACTCCGCGAGT-1	Sample 1_nCoV 1 scRNA-seq [SW103]	GSM4509011	63	PBMC	M	COVID-19 patient	severe COVID-19 patient	6.30218	2573	1162	Classical monocytes	Monocytes	severe COVID-19 patient
toy	9584	2581	S1	CAACAGTAGAGTAACT-1	Sample 1_nCoV 1 scRNA-seq [SW103]	GSM4509011	63	PBMC	M	COVID-19 patient	severe COVID-19 patient	6.7404	2479	1049	Classical monocytes	Monocytes	severe COVID-19 patient
toy	639	317	S1	CAACAGTAGCTCCACG-1	Sample 1_nCoV 1 scRNA-seq [SW103]	GSM4509011	63	PBMC	M	COVID-19 patient	severe COVID-19 patient	2.50391	1861	429	HSC_-G-CSF	HSC_-G-CSF	severe COVID-19 patient
toy	1605	826	S1	CAACAGTCAACGCCCA-1	Sample 1_nCoV 1 scRNA-seq [SW103]	GSM4509011	63	PBMC	M	COVID-19 patient	severe COVID-19 patient	7.47664	2105	825	Natural killer cells	NK cells	severe COVID-19 patient
toy	4739	1284	S1	CAACAGTCAGGTTTAC-1	Sample 1_nCoV 1 scRNA-seq [SW103]	GSM4509011	63	PBMC	M	COVID-19 patient	severe COVID-19 patient	7.46993	2908	1214	Naive B cells	B cells	severe COVID-19 patient
toy	1665	616	S1	CAACAGTCATGACACT-1	Sample 1_nCoV 1 scRNA-seq [SW103]	GSM4509011	63	PBMC	M	COVID-19 patient	severe COVID-19 patient	8.04805	2200	615	T regulatory cells	NA	severe COVID-19 patient
toy	5157	1576	S1	CAACAGTCATTGCAAC-1	Sample 1_nCoV 1 scRNA-seq [SW103]	GSM4509011	63	PBMC	M	COVID-19 patient	severe COVID-19 patient	6.9808	2993	1418	Naive B cells	B cells	severe COVID-19 patient
toy	6130	2051	S1	CAACAGTGTCTCTCCA-1	Sample 1_nCoV 1 scRNA-seq [SW103]	GSM4509011	63	PBMC	M	COVID-19 patient	severe COVID-19 patient	8.48287	2995	1586	Classical monocytes	Monocytes	severe COVID-19 patient
toy	1749	859	S1	CAACAGTGTCTGATCA-1	Sample 1_nCoV 1 scRNA-seq [SW103]	GSM4509011	63	PBMC	M	COVID-19 patient	severe COVID-19 patient	11.2064	2146	859	Classical monocytes	Monocytes	severe COVID-19 patient
toy	2670	1239	S1	CAACAGTTCGCTAAAC-1	Sample 1_nCoV 1 scRNA-seq [SW103]	GSM4509011	63	PBMC	M	COVID-19 patient	severe COVID-19 patient	7.41573	2568	1238	Non-Vd2 gd T cells	T cells	severe COVID-19 patient
toy	5271	1515	S1	CAACCAACACCAGCGT-1	Sample 1_nCoV 1 scRNA-seq [SW103]	GSM4509011	63	PBMC	M	COVID-19 patient	severe COVID-19 patient	6.65908	2971	1343	Naive B cells	B cells	severe COVID-19 patient
toy	4349	1555	S1	CAACCAACACGCTGCA-1	Sample 1_nCoV 1 scRNA-seq [SW103]	GSM4509011	63	PBMC	M	COVID-19 patient	severe COVID-19 patient	11.9108	2951	1529	Natural killer cells	NK cells	severe COVID-19 patient
toy	5674	1506	S1	CAACCAACAGCGCGTT-1	Sample 1_nCoV 1 scRNA-seq [SW103]	GSM4509011	63	PBMC	M	COVID-19 patient	severe COVID-19 patient	8.16003	2910	1222	Naive B cells	B cells	severe COVID-19 patient
toy	16461	3754	S1	CAACCAACATCATCTT-1	Sample 1_nCoV 1 scRNA-seq [SW103]	GSM4509011	63	PBMC	M	COVID-19 patient	severe COVID-19 patient	5.17587	2515	1169	Classical monocytes	Monocytes	severe COVID-19 patient
toy	6545	1925	S1	CAACCAATCTGCGGAC-1	Sample 1_nCoV 1 scRNA-seq [SW103]	GSM4509011	63	PBMC	M	COVID-19 patient	severe COVID-19 patient	5.8518	2876	1312	Switched memory B cells	B cells	severe COVID-19 patient
toy	7517	1923	S1	CAACCTCAGGAAGTGA-1	Sample 1_nCoV 1 scRNA-seq [SW103]	GSM4509011	63	PBMC	M	COVID-19 patient	severe COVID-19 patient	7.01078	2452	809	Non-switched memory B cells	B cells	severe COVID-19 patient
toy	1799	863	S1	CAACCTCAGGCAATGC-1	Sample 1_nCoV 1 scRNA-seq [SW103]	GSM4509011	63	PBMC	M	COVID-19 patient	severe COVID-19 patient	6.9483	2154	863	Classical monocytes	Monocytes	severe COVID-19 patient
toy	4404	1675	S1	CAACCTCAGTCATGCT-1	Sample 1_nCoV 1 scRNA-seq [SW103]	GSM4509011	63	PBMC	M	COVID-19 patient	severe COVID-19 patient	8.12897	2987	1639	Natural killer cells	NK cells	severe COVID-19 patient
toy	5897	1859	S1	CAACCTCGTATCGTGT-1	Sample 1_nCoV 1 scRNA-seq [SW103]	GSM4509011	63	PBMC	M	COVID-19 patient	severe COVID-19 patient	7.64796	2958	1464	Terminal effector CD4 T cells	T cells	severe COVID-19 patient
toy	3688	1351	S1	CAACCTCGTCAAAGCG-1	Sample 1_nCoV 1 scRNA-seq [SW103]	GSM4509011	63	PBMC	M	COVID-19 patient	severe COVID-19 patient	5.96529	2835	1346	Natural killer cells	NK cells	severe COVID-19 patient
toy	3486	1400	S1	CAACCTCTCAAACCCA-1	Sample 1_nCoV 1 scRNA-seq [SW103]	GSM4509011	63	PBMC	M	COVID-19 patient	severe COVID-19 patient	16.7527	2856	1394	Natural killer cells	NK cells	severe COVID-19 patient
toy	970	306	S1	CAACCTCTCAAGCGTT-1	Sample 1_nCoV 1 scRNA-seq [SW103]	GSM4509011	63	PBMC	M	COVID-19 patient	severe COVID-19 patient	11.8557	2094	389	Platelets	Platelets	severe COVID-19 patient
toy	3859	1560	S1	CAACCTCTCCCTTTGG-1	Sample 1_nCoV 1 scRNA-seq [SW103]	GSM4509011	63	PBMC	M	COVID-19 patient	severe COVID-19 patient	9.17336	2871	1548	Classical monocytes	Monocytes	severe COVID-19 patient
toy	5038	1804	S1	CAACGATAGTCCTGCG-1	Sample 1_nCoV 1 scRNA-seq [SW103]	GSM4509011	63	PBMC	M	COVID-19 patient	severe COVID-19 patient	4.5653	3078	1661	Natural killer cells	NK cells	severe COVID-19 patient
toy	11194	2718	S1	CAACGATCAGCAGACA-1	Sample 1_nCoV 1 scRNA-seq [SW103]	GSM4509011	63	PBMC	M	COVID-19 patient	severe COVID-19 patient	6.70895	2503	992	Classical monocytes	Monocytes	severe COVID-19 patient
toy	9697	2348	S1	CAACGATTCAAGAGTA-1	Sample 1_nCoV 1 scRNA-seq [SW103]	GSM4509011	63	PBMC	M	COVID-19 patient	severe COVID-19 patient	10.2918	2578	855	Classical monocytes	Monocytes	severe COVID-19 patient
toy	4806	1403	S1	CAACGGCAGATCCCAT-1	Sample 1_nCoV 1 scRNA-seq [SW103]	GSM4509011	63	PBMC	M	COVID-19 patient	severe COVID-19 patient	5.4099	2936	1322	Naive B cells	B cells	severe COVID-19 patient
toy	2807	1061	S1	CAACGGCAGTACTGTC-1	Sample 1_nCoV 1 scRNA-seq [SW103]	GSM4509011	63	PBMC	M	COVID-19 patient	severe COVID-19 patient	11.5069	2595	1060	Naive B cells	B cells	severe COVID-19 patient
toy	9096	2638	S1	CAACGGCCATAGATCC-1	Sample 1_nCoV 1 scRNA-seq [SW103]	GSM4509011	63	PBMC	M	COVID-19 patient	severe COVID-19 patient	5.51891	2419	998	Non-Vd2 gd T cells	T cells	severe COVID-19 patient
toy	8308	1761	S1	CAACGGCGTCGGCTAC-1	Sample 1_nCoV 1 scRNA-seq [SW103]	GSM4509011	63	PBMC	M	COVID-19 patient	severe COVID-19 patient	7.35436	2393	591	Naive B cells	B cells	severe COVID-19 patient
toy	921	445	S1	CAACGGCGTCTGTTAG-1	Sample 1_nCoV 1 scRNA-seq [SW103]	GSM4509011	63	PBMC	M	COVID-19 patient	severe COVID-19 patient	5.53746	1995	540	Platelets	Platelets	severe COVID-19 patient
toy	896	345	S1	CAACGGCTCTAGTACG-1	Sample 1_nCoV 1 scRNA-seq [SW103]	GSM4509011	63	PBMC	M	COVID-19 patient	severe COVID-19 patient	12.3884	2097	394	Platelets	Platelets	severe COVID-19 patient
toy	2080	775	S1	CAAGACTAGACGGTTG-1	Sample 1_nCoV 1 scRNA-seq [SW103]	GSM4509011	63	PBMC	M	COVID-19 patient	severe COVID-19 patient	11.25	2291	772	T regulatory cells	NA	severe COVID-19 patient
toy	449	225	S1	CAAGACTAGCATCCCG-1	Sample 1_nCoV 1 scRNA-seq [SW103]	GSM4509011	63	PBMC	M	COVID-19 patient	severe COVID-19 patient	9.35412	1886	360	HSC_-G-CSF	HSC_-G-CSF	severe COVID-19 patient
toy	5052	1544	S1	CAAGACTAGGCCTGCT-1	Sample 1_nCoV 1 scRNA-seq [SW103]	GSM4509011	63	PBMC	M	COVID-19 patient	severe COVID-19 patient	3.78068	2981	1406	Naive B cells	B cells	severe COVID-19 patient
toy	4594	1703	S1	CAAGACTCATAGATGA-1	Sample 1_nCoV 1 scRNA-seq [SW103]	GSM4509011	63	PBMC	M	COVID-19 patient	severe COVID-19 patient	8.83761	2979	1650	Classical monocytes	Monocytes	severe COVID-19 patient
toy	9291	2079	S1	CAAGACTGTAGGCAAC-1	Sample 1_nCoV 1 scRNA-seq [SW103]	GSM4509011	63	PBMC	M	COVID-19 patient	severe COVID-19 patient	4.56356	2358	656	Th17 cells	CD4+ T cells	severe COVID-19 patient
toy	3744	422	S1	CAAGACTGTCTTCAAG-1	Sample 1_nCoV 1 scRNA-seq [SW103]	GSM4509011	63	PBMC	M	COVID-19 patient	severe COVID-19 patient	2.40385	2823	391	Erythroblast	Erythroblast	severe COVID-19 patient
toy	636	260	S1	CAAGACTTCATTTACC-1	Sample 1_nCoV 1 scRNA-seq [SW103]	GSM4509011	63	PBMC	M	COVID-19 patient	severe COVID-19 patient	10.8491	1919	372	Platelets	Platelets	severe COVID-19 patient
toy	4168	1311	S1	CAAGAGGAGTAAGACT-1	Sample 1_nCoV 1 scRNA-seq [SW103]	GSM4509011	63	PBMC	M	COVID-19 patient	severe COVID-19 patient	14.4434	2855	1278	T regulatory cells	CD4+ T cells	severe COVID-19 patient
toy	1622	690	S1	CAAGAGGCACATGACT-1	Sample 1_nCoV 1 scRNA-seq [SW103]	GSM4509011	63	PBMC	M	COVID-19 patient	severe COVID-19 patient	13.6252	2149	689	Classical monocytes	Monocytes	severe COVID-19 patient
toy	5424	1588	S1	CAAGAGGCACTGAATC-1	Sample 1_nCoV 1 scRNA-seq [SW103]	GSM4509011	63	PBMC	M	COVID-19 patient	severe COVID-19 patient	7.74336	2971	1374	Naive B cells	B cells	severe COVID-19 patient
toy	14807	3314	S1	CAAGAGGGTAACATAG-1	Sample 1_nCoV 1 scRNA-seq [SW103]	GSM4509011	63	PBMC	M	COVID-19 patient	severe COVID-19 patient	7.04397	2537	1070	Classical monocytes	Monocytes	severe COVID-19 patient
toy	7915	2357	S1	CAAGAGGTCATAGACC-1	Sample 1_nCoV 1 scRNA-seq [SW103]	GSM4509011	63	PBMC	M	COVID-19 patient	severe COVID-19 patient	6.92356	2421	1002	Classical monocytes	Monocytes	severe COVID-19 patient
toy	480	228	S1	CAAGAGGTCGCCTATC-1	Sample 1_nCoV 1 scRNA-seq [SW103]	GSM4509011	63	PBMC	M	COVID-19 patient	severe COVID-19 patient	6.25	1836	373	HSC_-G-CSF	HSC_-G-CSF	severe COVID-19 patient
toy	21115	3852	S1	CAAGAGGTCGTGCTCT-1	Sample 1_nCoV 1 scRNA-seq [SW103]	GSM4509011	63	PBMC	M	COVID-19 patient	severe COVID-19 patient	6.9382	2363	773	NA	B cells	severe COVID-19 patient
toy	8252	1953	S1	CAAGCTAAGCCTCGTG-1	Sample 1_nCoV 1 scRNA-seq [SW103]	GSM4509011	63	PBMC	M	COVID-19 patient	severe COVID-19 patient	8.44644	2364	676	Exhausted B cells	B cells	severe COVID-19 patient
toy	462	211	S1	CAAGCTAGTCGTCATA-1	Sample 1_nCoV 1 scRNA-seq [SW103]	GSM4509011	63	PBMC	M	COVID-19 patient	severe COVID-19 patient	15.368	1889	364	HSC_-G-CSF	HSC_-G-CSF	severe COVID-19 patient
toy	5478	2008	S1	CAAGCTAGTTCTCACC-1	Sample 1_nCoV 1 scRNA-seq [SW103]	GSM4509011	63	PBMC	M	COVID-19 patient	severe COVID-19 patient	7.74005	3106	1787	Classical monocytes	Monocytes	severe COVID-19 patient
toy	337	216	S1	CAAGCTATCGCGTGAC-1	Sample 1_nCoV 1 scRNA-seq [SW103]	GSM4509011	63	PBMC	M	COVID-19 patient	severe COVID-19 patient	11.8694	1790	351	Exhausted B cells	B cells	severe COVID-19 patient
toy	9720	2043	S1	CAAGGGAAGGTGGCTA-1	Sample 1_nCoV 1 scRNA-seq [SW103]	GSM4509011	63	PBMC	M	COVID-19 patient	severe COVID-19 patient	6.93416	2395	624	Non-switched memory B cells	B cells	severe COVID-19 patient
toy	6913	1645	S1	CAAGGGACACGTCGGT-1	Sample 1_nCoV 1 scRNA-seq [SW103]	GSM4509011	63	PBMC	M	COVID-19 patient	severe COVID-19 patient	6.84218	2651	910	Non-switched memory B cells	B cells	severe COVID-19 patient
toy	960	587	S1	CAAGGGAGTCACCGCA-1	Sample 1_nCoV 1 scRNA-seq [SW103]	GSM4509011	63	PBMC	M	COVID-19 patient	severe COVID-19 patient	14.5833	2108	637	Natural killer cells	NK cells	severe COVID-19 patient
toy	1639	645	S1	CAAGGGATCACCGCTT-1	Sample 1_nCoV 1 scRNA-seq [SW103]	GSM4509011	63	PBMC	M	COVID-19 patient	severe COVID-19 patient	4.33191	2136	649	Platelets	Platelets	severe COVID-19 patient
toy	6609	1753	S1	CAAGGGATCATGCGGC-1	Sample 1_nCoV 1 scRNA-seq [SW103]	GSM4509011	63	PBMC	M	COVID-19 patient	severe COVID-19 patient	4.82675	2808	1184	Non-switched memory B cells	B cells	severe COVID-19 patient
toy	14216	3293	S1	CAATACGCAACCAGAG-1	Sample 1_nCoV 1 scRNA-seq [SW103]	GSM4509011	63	PBMC	M	COVID-19 patient	severe COVID-19 patient	8.53264	2602	1195	Classical monocytes	Monocytes	severe COVID-19 patient
toy	746	302	S1	CAATACGCAAGTTCCA-1	Sample 1_nCoV 1 scRNA-seq [SW103]	GSM4509011	63	PBMC	M	COVID-19 patient	severe COVID-19 patient	17.2922	1986	387	HSC_-G-CSF	HSC_-G-CSF	severe COVID-19 patient
toy	4041	1283	S1	CAATACGGTAGAGACC-1	Sample 1_nCoV 1 scRNA-seq [SW103]	GSM4509011	63	PBMC	M	COVID-19 patient	severe COVID-19 patient	5.7659	2828	1262	Naive B cells	B cells	severe COVID-19 patient
toy	10257	2041	S1	CAATACGGTCAGGTAG-1	Sample 1_nCoV 1 scRNA-seq [SW103]	GSM4509011	63	PBMC	M	COVID-19 patient	severe COVID-19 patient	7.04884	2396	627	Non-switched memory B cells	B cells	severe COVID-19 patient
toy	6500	1674	S1	CAATACGGTCCCTAAA-1	Sample 1_nCoV 1 scRNA-seq [SW103]	GSM4509011	63	PBMC	M	COVID-19 patient	severe COVID-19 patient	6.56923	2807	1129	Th1/Th17 cells	CD4+ T cells	severe COVID-19 patient
toy	8346	2067	S1	CAATACGGTGTTCCAA-1	Sample 1_nCoV 1 scRNA-seq [SW103]	GSM4509011	63	PBMC	M	COVID-19 patient	severe COVID-19 patient	7.06925	2393	739	Non-switched memory B cells	B cells	severe COVID-19 patient
toy	4737	1592	S1	CAATACGTCCATTGTT-1	Sample 1_nCoV 1 scRNA-seq [SW103]	GSM4509011	63	PBMC	M	COVID-19 patient	severe COVID-19 patient	7.36753	3029	1522	Naive CD4 T cells	CD4+ T cells	severe COVID-19 patient
toy	9928	2774	S1	CAATCGACAGAGCTAG-1	Sample 1_nCoV 1 scRNA-seq [SW103]	GSM4509011	63	PBMC	M	COVID-19 patient	severe COVID-19 patient	4.43191	2425	1057	Classical monocytes	Monocytes	severe COVID-19 patient
toy	10601	2791	S1	CAATCGAGTAAGGCTG-1	Sample 1_nCoV 1 scRNA-seq [SW103]	GSM4509011	63	PBMC	M	COVID-19 patient	severe COVID-19 patient	7.2163	2515	1104	Effector memory CD8 T cells	T cells	severe COVID-19 patient
toy	7487	2179	S1	CAATCGATCATTCACT-1	Sample 1_nCoV 1 scRNA-seq [SW103]	GSM4509011	63	PBMC	M	COVID-19 patient	severe COVID-19 patient	7.69334	2459	989	Classical monocytes	Monocytes	severe COVID-19 patient
toy	7123	1958	S1	CAATGACGTAGAGCTG-1	Sample 1_nCoV 1 scRNA-seq [SW103]	GSM4509011	63	PBMC	M	COVID-19 patient	severe COVID-19 patient	6.06486	2646	1071	Non-switched memory B cells	B cells	severe COVID-19 patient
toy	2954	1207	S1	CAATGACTCATCGCTC-1	Sample 1_nCoV 1 scRNA-seq [SW103]	GSM4509011	63	PBMC	M	COVID-19 patient	severe COVID-19 patient	10.5619	2676	1207	Classical monocytes	Monocytes	severe COVID-19 patient
toy	653	287	S1	CACAACAAGCACACCC-1	Sample 1_nCoV 1 scRNA-seq [SW103]	GSM4509011	63	PBMC	M	COVID-19 patient	severe COVID-19 patient	10.7198	1880	419	Platelets	Platelets	severe COVID-19 patient
toy	756	318	S1	CACAACAAGCTCACTA-1	Sample 1_nCoV 1 scRNA-seq [SW103]	GSM4509011	63	PBMC	M	COVID-19 patient	severe COVID-19 patient	4.49735	1977	415	Platelets	Platelets	severe COVID-19 patient
toy	1565	790	S1	CACAACACACCCTAGG-1	Sample 1_nCoV 1 scRNA-seq [SW103]	GSM4509011	63	PBMC	M	COVID-19 patient	severe COVID-19 patient	9.58466	2074	791	Classical monocytes	NA	severe COVID-19 patient
toy	8561	2115	S1	CACAACATCCGAGATT-1	Sample 1_nCoV 1 scRNA-seq [SW103]	GSM4509011	63	PBMC	M	COVID-19 patient	severe COVID-19 patient	4.87093	2368	768	Th2 cells	CD4+ T cells	severe COVID-19 patient
toy	11796	2230	S1	CACAACATCGGTAGGA-1	Sample 1_nCoV 1 scRNA-seq [SW103]	GSM4509011	63	PBMC	M	COVID-19 patient	severe COVID-19 patient	5.40861	2431	660	Th2 cells	CD8+ T cells	severe COVID-19 patient
toy	479	237	S1	CACACAACATCTTTCA-1	Sample 1_nCoV 1 scRNA-seq [SW103]	GSM4509011	63	PBMC	M	COVID-19 patient	severe COVID-19 patient	8.76827	1870	370	HSC_-G-CSF	HSC_-G-CSF	severe COVID-19 patient
toy	10211	2599	S1	CACACAAGTGCGTCGT-1	Sample 1_nCoV 1 scRNA-seq [SW103]	GSM4509011	63	PBMC	M	COVID-19 patient	severe COVID-19 patient	5.69974	2552	1083	Classical monocytes	Monocytes	severe COVID-19 patient
toy	14409	3351	S1	CACACAAGTTAATCGC-1	Sample 1_nCoV 1 scRNA-seq [SW103]	GSM4509011	63	PBMC	M	COVID-19 patient	severe COVID-19 patient	7.91866	2567	1120	Classical monocytes	Monocytes	severe COVID-19 patient
toy	8782	2654	S1	CACAGATAGGCGCTCT-1	Sample 1_nCoV 1 scRNA-seq [SW103]	GSM4509011	63	PBMC	M	COVID-19 patient	severe COVID-19 patient	5.42018	2402	1053	Classical monocytes	Monocytes	severe COVID-19 patient
toy	1085	418	S1	CACAGATAGGTCGTGA-1	Sample 1_nCoV 1 scRNA-seq [SW103]	GSM4509011	63	PBMC	M	COVID-19 patient	severe COVID-19 patient	5.80645	2154	480	Platelets	Platelets	severe COVID-19 patient
toy	8458	2564	S1	CACAGATAGTTCCTGA-1	Sample 1_nCoV 1 scRNA-seq [SW103]	GSM4509011	63	PBMC	M	COVID-19 patient	severe COVID-19 patient	9.38756	2417	1074	Classical monocytes	Monocytes	severe COVID-19 patient
toy	5748	1815	S1	CACAGATCAACCAATC-1	Sample 1_nCoV 1 scRNA-seq [SW103]	GSM4509011	63	PBMC	M	COVID-19 patient	severe COVID-19 patient	4.76688	3026	1509	T regulatory cells	CD4+ T cells	severe COVID-19 patient
toy	1618	634	S1	CACAGATCACCCTGAG-1	Sample 1_nCoV 1 scRNA-seq [SW103]	GSM4509011	63	PBMC	M	COVID-19 patient	severe COVID-19 patient	4.75896	2130	641	Platelets	Platelets	severe COVID-19 patient
toy	679	290	S1	CACAGATGTAGCGAGT-1	Sample 1_nCoV 1 scRNA-seq [SW103]	GSM4509011	63	PBMC	M	COVID-19 patient	severe COVID-19 patient	2.65096	1941	394	Platelets	Platelets	severe COVID-19 patient
toy	4171	1645	S1	CACAGATGTTAGGCTT-1	Sample 1_nCoV 1 scRNA-seq [SW103]	GSM4509011	63	PBMC	M	COVID-19 patient	severe COVID-19 patient	9.06257	2921	1630	Classical monocytes	Monocytes	severe COVID-19 patient
toy	2681	1208	S1	CACAGATGTTATAGAG-1	Sample 1_nCoV 1 scRNA-seq [SW103]	GSM4509011	63	PBMC	M	COVID-19 patient	severe COVID-19 patient	17.5308	2588	1206	Th17 cells	CD4+ T cells	severe COVID-19 patient
toy	5102	1883	S1	CACAGATTCATGGATC-1	Sample 1_nCoV 1 scRNA-seq [SW103]	GSM4509011	63	PBMC	M	COVID-19 patient	severe COVID-19 patient	9.05527	3081	1725	Th1/Th17 cells	CD4+ T cells	severe COVID-19 patient
toy	9613	2680	S1	CACAGATTCGACGACC-1	Sample 1_nCoV 1 scRNA-seq [SW103]	GSM4509011	63	PBMC	M	COVID-19 patient	severe COVID-19 patient	11.6613	2632	1145	MEP	MEP	severe COVID-19 patient
toy	1321	682	S1	CACAGGCCACAACGTT-1	Sample 1_nCoV 1 scRNA-seq [SW103]	GSM4509011	63	PBMC	M	COVID-19 patient	severe COVID-19 patient	10.2952	2085	696	Classical monocytes	Monocytes	severe COVID-19 patient
toy	7182	2110	S1	CACAGGCCAGTGTGCC-1	Sample 1_nCoV 1 scRNA-seq [SW103]	GSM4509011	63	PBMC	M	COVID-19 patient	severe COVID-19 patient	3.467	2605	1111	Th1 cells	CD4+ T cells	severe COVID-19 patient
toy	4153	1353	S1	CACAGGCGTACGTTCA-1	Sample 1_nCoV 1 scRNA-seq [SW103]	GSM4509011	63	PBMC	M	COVID-19 patient	severe COVID-19 patient	7.63304	2862	1331	Naive B cells	B cells	severe COVID-19 patient
toy	13588	3312	S1	CACAGGCTCGGCTTCT-1	Sample 1_nCoV 1 scRNA-seq [SW103]	GSM4509011	63	PBMC	M	COVID-19 patient	severe COVID-19 patient	9.29497	2576	1178	Classical monocytes	Monocytes	severe COVID-19 patient
toy	5117	1861	S1	CACATGAAGGGTCACA-1	Sample 1_nCoV 1 scRNA-seq [SW103]	GSM4509011	63	PBMC	M	COVID-19 patient	severe COVID-19 patient	6.72269	3066	1710	Classical monocytes	Monocytes	severe COVID-19 patient
toy	922	585	S1	CACATGAAGTTATGGA-1	Sample 1_nCoV 1 scRNA-seq [SW103]	GSM4509011	63	PBMC	M	COVID-19 patient	severe COVID-19 patient	5.63991	2091	605	Classical monocytes	Monocytes	severe COVID-19 patient
toy	5222	1869	S1	CACATGACACACAGCC-1	Sample 1_nCoV 1 scRNA-seq [SW103]	GSM4509011	63	PBMC	M	COVID-19 patient	severe COVID-19 patient	7.90885	3084	1700	Classical monocytes	Monocytes	severe COVID-19 patient
toy	1806	260	S1	CACATGACATAACCCA-1	Sample 1_nCoV 1 scRNA-seq [SW103]	GSM4509011	63	PBMC	M	COVID-19 patient	severe COVID-19 patient	2.32558	2171	260	Erythroblast	Erythroblast	severe COVID-19 patient
toy	4537	1683	S1	CACATGAGTCGATTTG-1	Sample 1_nCoV 1 scRNA-seq [SW103]	GSM4509011	63	PBMC	M	COVID-19 patient	severe COVID-19 patient	8.22129	3001	1631	Natural killer cells	NK cells	severe COVID-19 patient
toy	11181	2841	S1	CACATGATCGACGAGA-1	Sample 1_nCoV 1 scRNA-seq [SW103]	GSM4509011	63	PBMC	M	COVID-19 patient	severe COVID-19 patient	8.17458	2500	1038	Classical monocytes	Monocytes	severe COVID-19 patient
toy	8453	2449	S1	CACCAAATCCTTCTGG-1	Sample 1_nCoV 1 scRNA-seq [SW103]	GSM4509011	63	PBMC	M	COVID-19 patient	severe COVID-19 patient	4.88584	2388	899	Exhausted B cells	B cells	severe COVID-19 patient
toy	8849	2802	S1	CACCGTTAGCAGGTCA-1	Sample 1_nCoV 1 scRNA-seq [SW103]	GSM4509011	63	PBMC	M	COVID-19 patient	severe COVID-19 patient	6.04588	2395	1118	Classical monocytes	Monocytes	severe COVID-19 patient
toy	3552	1172	S1	CACCGTTAGGAATTAC-1	Sample 1_nCoV 1 scRNA-seq [SW103]	GSM4509011	63	PBMC	M	COVID-19 patient	severe COVID-19 patient	7.51689	2795	1164	Non-switched memory B cells	B cells	severe COVID-19 patient
toy	5539	1765	S1	CACCGTTAGGTCCTGC-1	Sample 1_nCoV 1 scRNA-seq [SW103]	GSM4509011	63	PBMC	M	COVID-19 patient	severe COVID-19 patient	7.96173	3044	1516	Natural killer cells	NK cells	severe COVID-19 patient
toy	6251	1635	S1	CACCGTTTCTCCATAT-1	Sample 1_nCoV 1 scRNA-seq [SW103]	GSM4509011	63	PBMC	M	COVID-19 patient	severe COVID-19 patient	5.08719	2869	1204	Naive B cells	B cells	severe COVID-19 patient
toy	277	207	S1	CACGAATAGAAGCCAC-1	Sample 1_nCoV 1 scRNA-seq [SW103]	GSM4509011	63	PBMC	M	COVID-19 patient	severe COVID-19 patient	10.8303	1704	397	Myeloid dendritic cells	NA	severe COVID-19 patient
toy	6783	1998	S1	CACGAATAGACTTAAG-1	Sample 1_nCoV 1 scRNA-seq [SW103]	GSM4509011	63	PBMC	M	COVID-19 patient	severe COVID-19 patient	5.82338	2821	1268	Naive B cells	B cells	severe COVID-19 patient
toy	15830	3377	S1	CACGAATAGGGCAAGG-1	Sample 1_nCoV 1 scRNA-seq [SW103]	GSM4509011	63	PBMC	M	COVID-19 patient	severe COVID-19 patient	5.40745	2481	931	NA	NA	severe COVID-19 patient
toy	4764	1766	S1	CACGAATGTATGGTAA-1	Sample 1_nCoV 1 scRNA-seq [SW103]	GSM4509011	63	PBMC	M	COVID-19 patient	severe COVID-19 patient	8.60621	3084	1692	Natural killer cells	NK cells	severe COVID-19 patient
toy	10053	2538	S1	CACGAATTCGCCATAA-1	Sample 1_nCoV 1 scRNA-seq [SW103]	GSM4509011	63	PBMC	M	COVID-19 patient	severe COVID-19 patient	6.09768	2551	1025	Classical monocytes	Monocytes	severe COVID-19 patient
toy	5146	1338	S1	CACGGGTAGGCGTTAG-1	Sample 1_nCoV 1 scRNA-seq [SW103]	GSM4509011	63	PBMC	M	COVID-19 patient	severe COVID-19 patient	17.0812	2905	1180	Switched memory B cells	B cells	severe COVID-19 patient
toy	7053	1771	S1	CACGGGTAGGGCAGGA-1	Sample 1_nCoV 1 scRNA-seq [SW103]	GSM4509011	63	PBMC	M	COVID-19 patient	severe COVID-19 patient	10.4778	2627	942	Non-switched memory B cells	B cells	severe COVID-19 patient
toy	499	261	S1	CACGGGTAGTATAGAC-1	Sample 1_nCoV 1 scRNA-seq [SW103]	GSM4509011	63	PBMC	M	COVID-19 patient	severe COVID-19 patient	6.41283	1842	401	Progenitor cells	Dendritic cells	severe COVID-19 patient
toy	9726	2252	S1	CACGGGTCACTCACTC-1	Sample 1_nCoV 1 scRNA-seq [SW103]	GSM4509011	63	PBMC	M	COVID-19 patient	severe COVID-19 patient	4.28748	2420	810	Th1 cells	CD4+ T cells	severe COVID-19 patient
toy	8408	2501	S1	CACGGGTGTCCCTGAG-1	Sample 1_nCoV 1 scRNA-seq [SW103]	GSM4509011	63	PBMC	M	COVID-19 patient	severe COVID-19 patient	6.36299	2392	1006	Classical monocytes	Monocytes	severe COVID-19 patient
toy	13522	3244	S1	CACGGGTTCCGTTGGG-1	Sample 1_nCoV 1 scRNA-seq [SW103]	GSM4509011	63	PBMC	M	COVID-19 patient	severe COVID-19 patient	6.38959	2630	1209	Intermediate monocytes	Monocytes	severe COVID-19 patient
toy	4251	1155	S1	CACGGGTTCGGACTTA-1	Sample 1_nCoV 1 scRNA-seq [SW103]	GSM4509011	63	PBMC	M	COVID-19 patient	severe COVID-19 patient	12.2089	2837	1133	Naive B cells	B cells	severe COVID-19 patient
toy	10659	2883	S1	CACGGGTTCTCGCCTA-1	Sample 1_nCoV 1 scRNA-seq [SW103]	GSM4509011	63	PBMC	M	COVID-19 patient	severe COVID-19 patient	6.73609	2510	1128	Classical monocytes	Monocytes	severe COVID-19 patient
toy	8464	2002	S1	CACGTGGAGAGGGTCT-1	Sample 1_nCoV 1 scRNA-seq [SW103]	GSM4509011	63	PBMC	M	COVID-19 patient	severe COVID-19 patient	4.45416	2397	718	Naive B cells	B cells	severe COVID-19 patient
toy	5736	1581	S1	CACGTGGCAACCGACC-1	Sample 1_nCoV 1 scRNA-seq [SW103]	GSM4509011	63	PBMC	M	COVID-19 patient	severe COVID-19 patient	8.59484	2946	1296	Non-switched memory B cells	B cells	severe COVID-19 patient
toy	5773	1902	S1	CACGTGGCATGTAACC-1	Sample 1_nCoV 1 scRNA-seq [SW103]	GSM4509011	63	PBMC	M	COVID-19 patient	severe COVID-19 patient	8.1067	3018	1574	Classical monocytes	Monocytes	severe COVID-19 patient
toy	4453	1656	S1	CACGTGGGTACGAGTG-1	Sample 1_nCoV 1 scRNA-seq [SW103]	GSM4509011	63	PBMC	M	COVID-19 patient	severe COVID-19 patient	11.8123	2985	1622	Natural killer cells	NK cells	severe COVID-19 patient
toy	12020	3100	S1	CACGTGGGTCTCAGAT-1	Sample 1_nCoV 1 scRNA-seq [SW103]	GSM4509011	63	PBMC	M	COVID-19 patient	severe COVID-19 patient	7.04659	2539	1141	Classical monocytes	Monocytes	severe COVID-19 patient
toy	548	243	S1	CACGTGGTCCCGGTAG-1	Sample 1_nCoV 1 scRNA-seq [SW103]	GSM4509011	63	PBMC	M	COVID-19 patient	severe COVID-19 patient	15.3285	1868	385	NA	NA	severe COVID-19 patient
toy	8237	1905	S1	CACGTGGTCCGTGCGA-1	Sample 1_nCoV 1 scRNA-seq [SW103]	GSM4509011	63	PBMC	M	COVID-19 patient	severe COVID-19 patient	5.87593	2380	697	Naive CD8 T cells	CD8+ T cells	severe COVID-19 patient
toy	13056	2521	S1	CACGTTCAGAAATTGC-1	Sample 1_nCoV 1 scRNA-seq [SW103]	GSM4509011	63	PBMC	M	COVID-19 patient	severe COVID-19 patient	6.20404	2406	647	Switched memory B cells	B cells	severe COVID-19 patient
toy	3963	1510	S1	CACGTTCCAGACAATA-1	Sample 1_nCoV 1 scRNA-seq [SW103]	GSM4509011	63	PBMC	M	COVID-19 patient	severe COVID-19 patient	7.46909	2898	1497	Natural killer cells	NK cells	severe COVID-19 patient
toy	8853	2560	S1	CACGTTCCAGACCCGT-1	Sample 1_nCoV 1 scRNA-seq [SW103]	GSM4509011	63	PBMC	M	COVID-19 patient	severe COVID-19 patient	7.40992	2474	1083	Classical monocytes	Monocytes	severe COVID-19 patient
toy	585	242	S1	CACGTTCCATGAATAG-1	Sample 1_nCoV 1 scRNA-seq [SW103]	GSM4509011	63	PBMC	M	COVID-19 patient	severe COVID-19 patient	11.1111	1925	374	HSC_-G-CSF	HSC_-G-CSF	severe COVID-19 patient
toy	3498	1419	S1	CACGTTCCATGGGATG-1	Sample 1_nCoV 1 scRNA-seq [SW103]	GSM4509011	63	PBMC	M	COVID-19 patient	severe COVID-19 patient	9.00515	2828	1415	Classical monocytes	Monocytes	severe COVID-19 patient
toy	4025	1236	S1	CACTAAGAGATTGACA-1	Sample 1_nCoV 1 scRNA-seq [SW103]	GSM4509011	63	PBMC	M	COVID-19 patient	severe COVID-19 patient	4.12422	2864	1200	Platelets	Platelets	severe COVID-19 patient
toy	20018	3919	S1	CACTAAGAGGAAGTCC-1	Sample 1_nCoV 1 scRNA-seq [SW103]	GSM4509011	63	PBMC	M	COVID-19 patient	severe COVID-19 patient	9.4465	2431	981	Classical monocytes	Monocytes	severe COVID-19 patient
toy	1714	848	S1	CACTAAGAGGATTTGA-1	Sample 1_nCoV 1 scRNA-seq [SW103]	GSM4509011	63	PBMC	M	COVID-19 patient	severe COVID-19 patient	10.21	2140	848	Classical monocytes	Monocytes	severe COVID-19 patient
toy	4547	1671	S1	CACTAAGAGGTACTGG-1	Sample 1_nCoV 1 scRNA-seq [SW103]	GSM4509011	63	PBMC	M	COVID-19 patient	severe COVID-19 patient	10.1166	2988	1624	Classical monocytes	Monocytes	severe COVID-19 patient
toy	11326	2260	S1	CACTAAGCAAACCACT-1	Sample 1_nCoV 1 scRNA-seq [SW103]	GSM4509011	63	PBMC	M	COVID-19 patient	severe COVID-19 patient	6.33057	2455	732	Central memory CD8 T cells	CD8+ T cells	severe COVID-19 patient
toy	2539	1017	S1	CACTAAGCAATCGTCA-1	Sample 1_nCoV 1 scRNA-seq [SW103]	GSM4509011	63	PBMC	M	COVID-19 patient	severe COVID-19 patient	9.45254	2504	1016	NA	NA	severe COVID-19 patient
toy	9734	2090	S1	CACTAAGGTAGTTAGA-1	Sample 1_nCoV 1 scRNA-seq [SW103]	GSM4509011	63	PBMC	M	COVID-19 patient	severe COVID-19 patient	3.30799	2334	612	Th17 cells	CD4+ T cells	severe COVID-19 patient
toy	12157	3159	S1	CACTAAGGTGTTGACT-1	Sample 1_nCoV 1 scRNA-seq [SW103]	GSM4509011	63	PBMC	M	COVID-19 patient	severe COVID-19 patient	9.04828	2580	1217	Classical monocytes	Monocytes	severe COVID-19 patient
toy	2093	856	S1	CACTAAGTCCAAGCCG-1	Sample 1_nCoV 1 scRNA-seq [SW103]	GSM4509011	63	PBMC	M	COVID-19 patient	severe COVID-19 patient	2.91448	2284	853	Non-switched memory B cells	B cells	severe COVID-19 patient
toy	955	312	S1	CACTGAAAGGAGTATT-1	Sample 1_nCoV 1 scRNA-seq [SW103]	GSM4509011	63	PBMC	M	COVID-19 patient	severe COVID-19 patient	7.01571	2121	394	Platelets	Platelets	severe COVID-19 patient
toy	10752	2845	S1	CACTGAAAGTTGTAGA-1	Sample 1_nCoV 1 scRNA-seq [SW103]	GSM4509011	63	PBMC	M	COVID-19 patient	severe COVID-19 patient	7.7474	2533	1088	Vd2 gd T cells	T cells	severe COVID-19 patient
toy	6513	1763	S1	CACTGAACACCTTCCA-1	Sample 1_nCoV 1 scRNA-seq [SW103]	GSM4509011	63	PBMC	M	COVID-19 patient	severe COVID-19 patient	5.32781	2835	1192	Non-switched memory B cells	B cells	severe COVID-19 patient
toy	1260	459	S1	CACTGAACACTAGGCC-1	Sample 1_nCoV 1 scRNA-seq [SW103]	GSM4509011	63	PBMC	M	COVID-19 patient	severe COVID-19 patient	6.66667	2128	508	Platelets	Platelets	severe COVID-19 patient
toy	12530	3197	S1	CACTGAAGTAGACGTG-1	Sample 1_nCoV 1 scRNA-seq [SW103]	GSM4509011	63	PBMC	M	COVID-19 patient	severe COVID-19 patient	5.1237	2547	1147	Classical monocytes	Monocytes	severe COVID-19 patient
toy	5291	1860	S1	CACTGGGAGGTCCCTG-1	Sample 1_nCoV 1 scRNA-seq [SW103]	GSM4509011	63	PBMC	M	COVID-19 patient	severe COVID-19 patient	9.54451	3083	1684	Classical monocytes	Monocytes	severe COVID-19 patient
toy	1191	501	S1	CACTGGGAGTTCCGTA-1	Sample 1_nCoV 1 scRNA-seq [SW103]	GSM4509011	63	PBMC	M	COVID-19 patient	severe COVID-19 patient	6.88497	2280	517	Naive B cells	B cells	severe COVID-19 patient
toy	2509	584	S1	CACTGGGCACGGTCTG-1	Sample 1_nCoV 1 scRNA-seq [SW103]	GSM4509011	63	PBMC	M	COVID-19 patient	severe COVID-19 patient	2.51096	2479	580	Erythroblast	Erythroblast	severe COVID-19 patient
toy	16756	3412	S1	CACTGGGGTCAGGTAG-1	Sample 1_nCoV 1 scRNA-seq [SW103]	GSM4509011	63	PBMC	M	COVID-19 patient	severe COVID-19 patient	9.32203	2623	1071	Plasmacytoid dendritic cells	Dendritic cells	severe COVID-19 patient
toy	14720	3470	S1	CACTGTCAGGGAGATA-1	Sample 1_nCoV 1 scRNA-seq [SW103]	GSM4509011	63	PBMC	M	COVID-19 patient	severe COVID-19 patient	5.86957	2590	1181	Classical monocytes	Monocytes	severe COVID-19 patient
toy	4332	1662	S1	CACTGTCCACGACGTC-1	Sample 1_nCoV 1 scRNA-seq [SW103]	GSM4509011	63	PBMC	M	COVID-19 patient	severe COVID-19 patient	10.2031	2960	1627	Classical monocytes	Monocytes	severe COVID-19 patient
toy	2172	1000	S1	CACTGTCTCACCTTGC-1	Sample 1_nCoV 1 scRNA-seq [SW103]	GSM4509011	63	PBMC	M	COVID-19 patient	severe COVID-19 patient	7.32044	2292	1000	Classical monocytes	Monocytes	severe COVID-19 patient
toy	6091	2147	S1	CACTTCGAGGATTTCC-1	Sample 1_nCoV 1 scRNA-seq [SW103]	GSM4509011	63	PBMC	M	COVID-19 patient	severe COVID-19 patient	5.58201	3037	1694	MAIT cells	T cells	severe COVID-19 patient
toy	11781	3076	S1	CACTTCGCAATGGCCC-1	Sample 1_nCoV 1 scRNA-seq [SW103]	GSM4509011	63	PBMC	M	COVID-19 patient	severe COVID-19 patient	6.94338	2563	1186	Classical monocytes	Monocytes	severe COVID-19 patient
toy	7354	2286	S1	CACTTCGCACGCGTCA-1	Sample 1_nCoV 1 scRNA-seq [SW103]	GSM4509011	63	PBMC	M	COVID-19 patient	severe COVID-19 patient	7.58771	2526	1143	Classical monocytes	Monocytes	severe COVID-19 patient
toy	13058	2519	S1	CACTTCGGTAGATTAG-1	Sample 1_nCoV 1 scRNA-seq [SW103]	GSM4509011	63	PBMC	M	COVID-19 patient	severe COVID-19 patient	8.94471	2469	720	Exhausted B cells	B cells	severe COVID-19 patient
toy	13944	3347	S1	CACTTCGGTCGCTCGA-1	Sample 1_nCoV 1 scRNA-seq [SW103]	GSM4509011	63	PBMC	M	COVID-19 patient	severe COVID-19 patient	5.85198	2561	1180	Classical monocytes	Monocytes	severe COVID-19 patient
toy	6513	2010	S1	CACTTCGGTGTGCCTG-1	Sample 1_nCoV 1 scRNA-seq [SW103]	GSM4509011	63	PBMC	M	COVID-19 patient	severe COVID-19 patient	9.0281	2844	1374	Th1/Th17 cells	T cells	severe COVID-19 patient
toy	5882	1411	S1	CACTTCGGTTGACGGA-1	Sample 1_nCoV 1 scRNA-seq [SW103]	GSM4509011	63	PBMC	M	COVID-19 patient	severe COVID-19 patient	9.11255	2833	1074	Naive B cells	B cells	severe COVID-19 patient
toy	4828	1593	S1	CAGAGCCAGCATGGGT-1	Sample 1_nCoV 1 scRNA-seq [SW103]	GSM4509011	63	PBMC	M	COVID-19 patient	severe COVID-19 patient	5.48882	3011	1517	MAIT cells	NA	severe COVID-19 patient
toy	5991	2105	S1	CAGAGCCCAAACTCTG-1	Sample 1_nCoV 1 scRNA-seq [SW103]	GSM4509011	63	PBMC	M	COVID-19 patient	severe COVID-19 patient	7.12736	3019	1693	Classical monocytes	Monocytes	severe COVID-19 patient
toy	23646	4496	S1	CAGAGCCCAAATGGTA-1	Sample 1_nCoV 1 scRNA-seq [SW103]	GSM4509011	63	PBMC	M	COVID-19 patient	severe COVID-19 patient	6.1152	2816	1362	Effector memory CD8 T cells	T cells	severe COVID-19 patient
toy	2379	1028	S1	CAGAGCCGTCGTCTCT-1	Sample 1_nCoV 1 scRNA-seq [SW103]	GSM4509011	63	PBMC	M	COVID-19 patient	severe COVID-19 patient	4.62379	2392	1027	Classical monocytes	Monocytes	severe COVID-19 patient
toy	955	341	S1	CAGAGCCTCTCGCTTG-1	Sample 1_nCoV 1 scRNA-seq [SW103]	GSM4509011	63	PBMC	M	COVID-19 patient	severe COVID-19 patient	1.88482	2073	422	Platelets	Platelets	severe COVID-19 patient
toy	2227	841	S1	CAGATACAGAGCTTTC-1	Sample 1_nCoV 1 scRNA-seq [SW103]	GSM4509011	63	PBMC	M	COVID-19 patient	severe COVID-19 patient	3.77189	2300	839	Platelets	Platelets	severe COVID-19 patient
toy	7237	1900	S1	CAGATACAGAGTGTTA-1	Sample 1_nCoV 1 scRNA-seq [SW103]	GSM4509011	63	PBMC	M	COVID-19 patient	severe COVID-19 patient	8.04201	2620	973	Switched memory B cells	B cells	severe COVID-19 patient
toy	5388	1784	S1	CAGATACAGTATTCCG-1	Sample 1_nCoV 1 scRNA-seq [SW103]	GSM4509011	63	PBMC	M	COVID-19 patient	severe COVID-19 patient	10.0594	3040	1564	Non-Vd2 gd T cells	T cells	severe COVID-19 patient
toy	3965	1491	S1	CAGATACGTCTACATG-1	Sample 1_nCoV 1 scRNA-seq [SW103]	GSM4509011	63	PBMC	M	COVID-19 patient	severe COVID-19 patient	9.25599	2853	1478	Classical monocytes	Monocytes	severe COVID-19 patient
toy	1281	645	S1	CAGATCAAGATCCCAT-1	Sample 1_nCoV 1 scRNA-seq [SW103]	GSM4509011	63	PBMC	M	COVID-19 patient	severe COVID-19 patient	10.929	2087	687	Low-density neutrophils	Neutrophils	severe COVID-19 patient
toy	4613	1597	S1	CAGATCAAGCGCTTCG-1	Sample 1_nCoV 1 scRNA-seq [SW103]	GSM4509011	63	PBMC	M	COVID-19 patient	severe COVID-19 patient	11.1207	2986	1543	Classical monocytes	Monocytes	severe COVID-19 patient
toy	3386	1399	S1	CAGATCAGTAACTAAG-1	Sample 1_nCoV 1 scRNA-seq [SW103]	GSM4509011	63	PBMC	M	COVID-19 patient	severe COVID-19 patient	11.7543	2819	1397	Classical monocytes	Monocytes	severe COVID-19 patient
toy	4689	1714	S1	CAGATCATCAACTCTT-1	Sample 1_nCoV 1 scRNA-seq [SW103]	GSM4509011	63	PBMC	M	COVID-19 patient	severe COVID-19 patient	7.95479	3055	1650	Natural killer cells	NK cells	severe COVID-19 patient
toy	5325	1759	S1	CAGATCATCACAGTGT-1	Sample 1_nCoV 1 scRNA-seq [SW103]	GSM4509011	63	PBMC	M	COVID-19 patient	severe COVID-19 patient	9.59624	3045	1563	Classical monocytes	Monocytes	severe COVID-19 patient
toy	873	351	S1	CAGATCATCCTACTGC-1	Sample 1_nCoV 1 scRNA-seq [SW103]	GSM4509011	63	PBMC	M	COVID-19 patient	severe COVID-19 patient	4.92554	2022	446	Platelets	Platelets	severe COVID-19 patient
toy	570	283	S1	CAGATCATCTTTGATC-1	Sample 1_nCoV 1 scRNA-seq [SW103]	GSM4509011	63	PBMC	M	COVID-19 patient	severe COVID-19 patient	7.36842	1858	408	NA	NA	severe COVID-19 patient
toy	9976	2774	S1	CAGATTGAGAGGATCC-1	Sample 1_nCoV 1 scRNA-seq [SW103]	GSM4509011	63	PBMC	M	COVID-19 patient	severe COVID-19 patient	8.56055	2437	1044	Classical monocytes	Monocytes	severe COVID-19 patient
toy	5405	1349	S1	CAGATTGAGCGAGAAA-1	Sample 1_nCoV 1 scRNA-seq [SW103]	GSM4509011	63	PBMC	M	COVID-19 patient	severe COVID-19 patient	8.0666	2885	1133	Naive B cells	B cells	severe COVID-19 patient
toy	2229	946	S1	CAGATTGCAAGTGACG-1	Sample 1_nCoV 1 scRNA-seq [SW103]	GSM4509011	63	PBMC	M	COVID-19 patient	severe COVID-19 patient	12.9655	2317	945	Classical monocytes	Monocytes	severe COVID-19 patient
toy	8816	1779	S1	CAGATTGCATTGCAAC-1	Sample 1_nCoV 1 scRNA-seq [SW103]	GSM4509011	63	PBMC	M	COVID-19 patient	severe COVID-19 patient	5.25181	2382	591	Th1/Th17 cells	CD4+ T cells	severe COVID-19 patient
toy	10952	2921	S1	CAGATTGGTACGTAGG-1	Sample 1_nCoV 1 scRNA-seq [SW103]	GSM4509011	63	PBMC	M	COVID-19 patient	severe COVID-19 patient	8.50073	2494	1073	Classical monocytes	Monocytes	severe COVID-19 patient
toy	4717	1385	S1	CAGATTGGTGATTCAC-1	Sample 1_nCoV 1 scRNA-seq [SW103]	GSM4509011	63	PBMC	M	COVID-19 patient	severe COVID-19 patient	6.57197	2933	1312	Naive B cells	B cells	severe COVID-19 patient
toy	7757	1963	S1	CAGATTGGTGGAAATT-1	Sample 1_nCoV 1 scRNA-seq [SW103]	GSM4509011	63	PBMC	M	COVID-19 patient	severe COVID-19 patient	6.78097	2384	787	Th1 cells	CD4+ T cells	severe COVID-19 patient
toy	488	207	S1	CAGATTGTCCATAGGT-1	Sample 1_nCoV 1 scRNA-seq [SW103]	GSM4509011	63	PBMC	M	COVID-19 patient	severe COVID-19 patient	2.2541	1877	343	HSC_-G-CSF	HSC_-G-CSF	severe COVID-19 patient
toy	1811	901	S1	CAGATTGTCCCTGGTT-1	Sample 1_nCoV 1 scRNA-seq [SW103]	GSM4509011	63	PBMC	M	COVID-19 patient	severe COVID-19 patient	19.1607	2159	901	Classical monocytes	Monocytes	severe COVID-19 patient
toy	1531	490	S1	CAGATTGTCCGCACGA-1	Sample 1_nCoV 1 scRNA-seq [SW103]	GSM4509011	63	PBMC	M	COVID-19 patient	severe COVID-19 patient	12.4755	2165	505	Platelets	Platelets	severe COVID-19 patient
toy	5853	1781	S1	CAGATTGTCTGGCCGA-1	Sample 1_nCoV 1 scRNA-seq [SW103]	GSM4509011	63	PBMC	M	COVID-19 patient	severe COVID-19 patient	8.66222	2968	1439	MAIT cells	T cells	severe COVID-19 patient
toy	520	248	S1	CAGCAATAGTTGAAAC-1	Sample 1_nCoV 1 scRNA-seq [SW103]	GSM4509011	63	PBMC	M	COVID-19 patient	severe COVID-19 patient	5.19231	1836	382	Progenitor cells	NA	severe COVID-19 patient
toy	4641	1779	S1	CAGCAATAGTTGCCCG-1	Sample 1_nCoV 1 scRNA-seq [SW103]	GSM4509011	63	PBMC	M	COVID-19 patient	severe COVID-19 patient	7.47684	3055	1723	Natural killer cells	NK cells	severe COVID-19 patient
toy	7651	2080	S1	CAGCAATCAACCGTAT-1	Sample 1_nCoV 1 scRNA-seq [SW103]	GSM4509011	63	PBMC	M	COVID-19 patient	severe COVID-19 patient	6.88799	2498	915	Switched memory B cells	B cells	severe COVID-19 patient
toy	2511	215	S1	CAGCAATCACTCAGAT-1	Sample 1_nCoV 1 scRNA-seq [SW103]	GSM4509011	63	PBMC	M	COVID-19 patient	severe COVID-19 patient	1.79211	2475	215	HSC_-G-CSF	HSC_-G-CSF	severe COVID-19 patient
toy	1746	694	S1	CAGCAATTCCTGTAAG-1	Sample 1_nCoV 1 scRNA-seq [SW103]	GSM4509011	63	PBMC	M	COVID-19 patient	severe COVID-19 patient	4.86827	2190	693	Exhausted B cells	B cells	severe COVID-19 patient
toy	18628	4037	S1	CAGCACGAGAACGCGT-1	Sample 1_nCoV 1 scRNA-seq [SW103]	GSM4509011	63	PBMC	M	COVID-19 patient	severe COVID-19 patient	19.1271	2473	1077	Classical monocytes	Monocytes	severe COVID-19 patient
toy	10097	2322	S1	CAGCACGAGAGTAACT-1	Sample 1_nCoV 1 scRNA-seq [SW103]	GSM4509011	63	PBMC	M	COVID-19 patient	severe COVID-19 patient	5.01139	2360	713	Central memory CD8 T cells	T cells	severe COVID-19 patient
toy	5620	1471	S1	CAGCACGAGGGCTGAT-1	Sample 1_nCoV 1 scRNA-seq [SW103]	GSM4509011	63	PBMC	M	COVID-19 patient	severe COVID-19 patient	5	2920	1201	Naive B cells	B cells	severe COVID-19 patient
toy	753	351	S1	CAGCACGGTGCCGGTT-1	Sample 1_nCoV 1 scRNA-seq [SW103]	GSM4509011	63	PBMC	M	COVID-19 patient	severe COVID-19 patient	3.85126	1905	457	Platelets	Platelets	severe COVID-19 patient
toy	513	255	S1	CAGCACGGTTGTGCAT-1	Sample 1_nCoV 1 scRNA-seq [SW103]	GSM4509011	63	PBMC	M	COVID-19 patient	severe COVID-19 patient	14.23	1855	384	HSC_-G-CSF	HSC_-G-CSF	severe COVID-19 patient
toy	564	228	S1	CAGCAGCAGGCTGGAT-1	Sample 1_nCoV 1 scRNA-seq [SW103]	GSM4509011	63	PBMC	M	COVID-19 patient	severe COVID-19 patient	18.7943	1921	359	NA	NA	severe COVID-19 patient
toy	513	326	S1	CAGCAGCTCGCCTATC-1	Sample 1_nCoV 1 scRNA-seq [SW103]	GSM4509011	63	PBMC	M	COVID-19 patient	severe COVID-19 patient	1.36452	1806	426	NA	NA	severe COVID-19 patient
toy	3902	1102	S1	CAGCAGCTCGTGCATA-1	Sample 1_nCoV 1 scRNA-seq [SW103]	GSM4509011	63	PBMC	M	COVID-19 patient	severe COVID-19 patient	9.89236	2768	1096	Naive CD8 T cells	CD8+ T cells	severe COVID-19 patient
toy	2900	1205	S1	CAGCCAGAGAATTGCA-1	Sample 1_nCoV 1 scRNA-seq [SW103]	GSM4509011	63	PBMC	M	COVID-19 patient	severe COVID-19 patient	7.89655	2668	1205	Classical monocytes	Monocytes	severe COVID-19 patient
toy	11146	3059	S1	CAGCCAGAGACATGCG-1	Sample 1_nCoV 1 scRNA-seq [SW103]	GSM4509011	63	PBMC	M	COVID-19 patient	severe COVID-19 patient	6.35205	2566	1212	Classical monocytes	Monocytes	severe COVID-19 patient
toy	4363	1373	S1	CAGCCAGGTAACAGTA-1	Sample 1_nCoV 1 scRNA-seq [SW103]	GSM4509011	63	PBMC	M	COVID-19 patient	severe COVID-19 patient	6.89892	2905	1337	Naive B cells	B cells	severe COVID-19 patient
toy	5570	2068	S1	CAGCCAGTCTTAGCAG-1	Sample 1_nCoV 1 scRNA-seq [SW103]	GSM4509011	63	PBMC	M	COVID-19 patient	severe COVID-19 patient	4.48833	3137	1819	Effector memory CD8 T cells	T cells	severe COVID-19 patient
toy	909	365	S1	CAGCCAGTCTTCTAAC-1	Sample 1_nCoV 1 scRNA-seq [SW103]	GSM4509011	63	PBMC	M	COVID-19 patient	severe COVID-19 patient	7.26073	2068	444	Platelets	Platelets	severe COVID-19 patient
toy	1454	710	S1	CAGCGTGAGATAGTGT-1	Sample 1_nCoV 1 scRNA-seq [SW103]	GSM4509011	63	PBMC	M	COVID-19 patient	severe COVID-19 patient	12.3796	2078	711	Non-Vd2 gd T cells	NA	severe COVID-19 patient
toy	569	311	S1	CAGCGTGCATATGAAG-1	Sample 1_nCoV 1 scRNA-seq [SW103]	GSM4509011	63	PBMC	M	COVID-19 patient	severe COVID-19 patient	9.84183	1811	441	HSC_-G-CSF	HSC_-G-CSF	severe COVID-19 patient
toy	14383	3465	S1	CAGCGTGCATTCTCTA-1	Sample 1_nCoV 1 scRNA-seq [SW103]	GSM4509011	63	PBMC	M	COVID-19 patient	severe COVID-19 patient	10.4846	2530	1147	Classical monocytes	Monocytes	severe COVID-19 patient
toy	8977	2581	S1	CAGCGTGGTTACGATC-1	Sample 1_nCoV 1 scRNA-seq [SW103]	GSM4509011	63	PBMC	M	COVID-19 patient	severe COVID-19 patient	9.5689	2457	1018	Vd2 gd T cells	T cells	severe COVID-19 patient
toy	760	425	S1	CAGCGTGTCTACACTT-1	Sample 1_nCoV 1 scRNA-seq [SW103]	GSM4509011	63	PBMC	M	COVID-19 patient	severe COVID-19 patient	5.92105	1874	535	Platelets	Platelets	severe COVID-19 patient
toy	3363	1308	S1	CAGGCCAAGTGCACCC-1	Sample 1_nCoV 1 scRNA-seq [SW103]	GSM4509011	63	PBMC	M	COVID-19 patient	severe COVID-19 patient	15.9084	2789	1305	Classical monocytes	Monocytes	severe COVID-19 patient
toy	24592	4198	S1	CAGGCCACAATCTCGA-1	Sample 1_nCoV 1 scRNA-seq [SW103]	GSM4509011	63	PBMC	M	COVID-19 patient	severe COVID-19 patient	6.51431	2489	939	Myeloid dendritic cells	Dendritic cells	severe COVID-19 patient
toy	4220	1392	S1	CAGGCCAGTGGTAATA-1	Sample 1_nCoV 1 scRNA-seq [SW103]	GSM4509011	63	PBMC	M	COVID-19 patient	severe COVID-19 patient	8.81517	2880	1366	T regulatory cells	CD4+ T cells	severe COVID-19 patient
toy	18528	3330	S1	CAGGCCATCGACGCGT-1	Sample 1_nCoV 1 scRNA-seq [SW103]	GSM4509011	63	PBMC	M	COVID-19 patient	severe COVID-19 patient	8.61399	2409	714	Exhausted B cells	B cells	severe COVID-19 patient
toy	734	253	S1	CAGGCCATCGCGTCGA-1	Sample 1_nCoV 1 scRNA-seq [SW103]	GSM4509011	63	PBMC	M	COVID-19 patient	severe COVID-19 patient	16.6213	1983	365	HSC_-G-CSF	HSC_-G-CSF	severe COVID-19 patient
toy	918	402	S1	CAGGGCTAGGCATCGA-1	Sample 1_nCoV 1 scRNA-seq [SW103]	GSM4509011	63	PBMC	M	COVID-19 patient	severe COVID-19 patient	8.27887	2144	438	Switched memory B cells	B cells	severe COVID-19 patient
toy	13963	2914	S1	CAGGGCTCAGGAACCA-1	Sample 1_nCoV 1 scRNA-seq [SW103]	GSM4509011	63	PBMC	M	COVID-19 patient	severe COVID-19 patient	16.2358	2513	778	MAIT cells	NA	severe COVID-19 patient
toy	7770	2151	S1	CAGGGCTCATGGGTTT-1	Sample 1_nCoV 1 scRNA-seq [SW103]	GSM4509011	63	PBMC	M	COVID-19 patient	severe COVID-19 patient	6.56371	2509	929	Classical monocytes	Monocytes	severe COVID-19 patient
toy	963	457	S1	CAGGTATAGCAGAAAG-1	Sample 1_nCoV 1 scRNA-seq [SW103]	GSM4509011	63	PBMC	M	COVID-19 patient	severe COVID-19 patient	4.36137	2047	532	Platelets	Platelets	severe COVID-19 patient
toy	4147	1620	S1	CAGGTATAGCCAAGTG-1	Sample 1_nCoV 1 scRNA-seq [SW103]	GSM4509011	63	PBMC	M	COVID-19 patient	severe COVID-19 patient	7.1618	2930	1604	Classical monocytes	Monocytes	severe COVID-19 patient
toy	20085	3998	S1	CAGGTATAGTAATCCC-1	Sample 1_nCoV 1 scRNA-seq [SW103]	GSM4509011	63	PBMC	M	COVID-19 patient	severe COVID-19 patient	8.8474	2392	938	Classical monocytes	Monocytes	severe COVID-19 patient
toy	4060	1490	S1	CAGGTATCAAAGGGTC-1	Sample 1_nCoV 1 scRNA-seq [SW103]	GSM4509011	63	PBMC	M	COVID-19 patient	severe COVID-19 patient	8.81773	2885	1474	Natural killer cells	NK cells	severe COVID-19 patient
toy	4820	1512	S1	CAGGTATCACGACGAA-1	Sample 1_nCoV 1 scRNA-seq [SW103]	GSM4509011	63	PBMC	M	COVID-19 patient	severe COVID-19 patient	5.47718	2973	1423	Follicular helper T cells	CD4+ T cells	severe COVID-19 patient
toy	19204	3991	S1	CAGGTATCACGCAAAG-1	Sample 1_nCoV 1 scRNA-seq [SW103]	GSM4509011	63	PBMC	M	COVID-19 patient	severe COVID-19 patient	6.93605	2367	960	Classical monocytes	Monocytes	severe COVID-19 patient
toy	16990	3606	S1	CAGGTATGTAGATCCT-1	Sample 1_nCoV 1 scRNA-seq [SW103]	GSM4509011	63	PBMC	M	COVID-19 patient	severe COVID-19 patient	7.43378	2559	1092	Intermediate monocytes	Monocytes	severe COVID-19 patient
toy	8450	2112	S1	CAGGTATGTAGGAAAG-1	Sample 1_nCoV 1 scRNA-seq [SW103]	GSM4509011	63	PBMC	M	COVID-19 patient	severe COVID-19 patient	9.1716	2420	797	Naive B cells	B cells	severe COVID-19 patient
toy	944	379	S1	CAGGTATTCTGCACCT-1	Sample 1_nCoV 1 scRNA-seq [SW103]	GSM4509011	63	PBMC	M	COVID-19 patient	severe COVID-19 patient	7.83898	2078	461	Platelets	Platelets	severe COVID-19 patient
toy	4702	1653	S1	CAGTGCGAGTGGAATT-1	Sample 1_nCoV 1 scRNA-seq [SW103]	GSM4509011	63	PBMC	M	COVID-19 patient	severe COVID-19 patient	7.52871	3012	1573	Natural killer cells	NK cells	severe COVID-19 patient
toy	4174	1584	S1	CAGTGCGCAATAGTAG-1	Sample 1_nCoV 1 scRNA-seq [SW103]	GSM4509011	63	PBMC	M	COVID-19 patient	severe COVID-19 patient	9.27168	2957	1564	Natural killer cells	NK cells	severe COVID-19 patient
toy	5559	1924	S1	CAGTGCGCAGACGGAT-1	Sample 1_nCoV 1 scRNA-seq [SW103]	GSM4509011	63	PBMC	M	COVID-19 patient	severe COVID-19 patient	6.74582	3078	1677	Classical monocytes	Monocytes	severe COVID-19 patient
toy	7789	2464	S1	CAGTGCGGTAAGCGGT-1	Sample 1_nCoV 1 scRNA-seq [SW103]	GSM4509011	63	PBMC	M	COVID-19 patient	severe COVID-19 patient	10.8358	2445	1105	Classical monocytes	Monocytes	severe COVID-19 patient
toy	6922	1869	S1	CAGTGCGGTAAGTAGT-1	Sample 1_nCoV 1 scRNA-seq [SW103]	GSM4509011	63	PBMC	M	COVID-19 patient	severe COVID-19 patient	9.8093	2707	1114	Vd2 gd T cells	T cells	severe COVID-19 patient
toy	771	330	S1	CAGTGCGGTACAGTTC-1	Sample 1_nCoV 1 scRNA-seq [SW103]	GSM4509011	63	PBMC	M	COVID-19 patient	severe COVID-19 patient	6.48508	1953	436	Platelets	Platelets	severe COVID-19 patient
toy	11487	3086	S1	CAGTGCGGTTTCTTAC-1	Sample 1_nCoV 1 scRNA-seq [SW103]	GSM4509011	63	PBMC	M	COVID-19 patient	severe COVID-19 patient	7.17333	2485	1061	Classical monocytes	Monocytes	severe COVID-19 patient
toy	6503	2038	S1	CAGTGCGTCGTTATCT-1	Sample 1_nCoV 1 scRNA-seq [SW103]	GSM4509011	63	PBMC	M	COVID-19 patient	severe COVID-19 patient	9.87237	2848	1393	Classical monocytes	Monocytes	severe COVID-19 patient
toy	912	457	S1	CAGTTAGTCCGGACGT-1	Sample 1_nCoV 1 scRNA-seq [SW103]	GSM4509011	63	PBMC	M	COVID-19 patient	severe COVID-19 patient	2.08333	2001	545	Platelets	Platelets	severe COVID-19 patient
toy	7468	2304	S1	CAGTTAGTCGACCATA-1	Sample 1_nCoV 1 scRNA-seq [SW103]	GSM4509011	63	PBMC	M	COVID-19 patient	severe COVID-19 patient	6.70862	2454	1083	Classical monocytes	Monocytes	severe COVID-19 patient
toy	8598	2159	S1	CAGTTCCGTCTGCATA-1	Sample 1_nCoV 1 scRNA-seq [SW103]	GSM4509011	63	PBMC	M	COVID-19 patient	severe COVID-19 patient	6.32705	2362	734	Switched memory B cells	B cells	severe COVID-19 patient
toy	9864	2840	S1	CAGTTCCGTTCAAGTC-1	Sample 1_nCoV 1 scRNA-seq [SW103]	GSM4509011	63	PBMC	M	COVID-19 patient	severe COVID-19 patient	6.09286	2482	1147	Classical monocytes	Monocytes	severe COVID-19 patient
toy	10856	2677	S1	CAGTTCCGTTCGAAGG-1	Sample 1_nCoV 1 scRNA-seq [SW103]	GSM4509011	63	PBMC	M	COVID-19 patient	severe COVID-19 patient	6.81651	2399	829	Switched memory B cells	B cells	severe COVID-19 patient
toy	1384	459	S1	CATAAGCGTACGACTT-1	Sample 1_nCoV 1 scRNA-seq [SW103]	GSM4509011	63	PBMC	M	COVID-19 patient	severe COVID-19 patient	15.7514	2131	503	Platelets	Platelets	severe COVID-19 patient
toy	8231	1944	S1	CATAAGCGTCTATGAC-1	Sample 1_nCoV 1 scRNA-seq [SW103]	GSM4509011	63	PBMC	M	COVID-19 patient	severe COVID-19 patient	4.5681	2375	706	Naive CD4 T cells	CD4+ T cells	severe COVID-19 patient
toy	526	290	S1	CATAAGCGTGTGTTTG-1	Sample 1_nCoV 1 scRNA-seq [SW103]	GSM4509011	63	PBMC	M	COVID-19 patient	severe COVID-19 patient	13.8783	1801	449	Low-density neutrophils	Neutrophils	severe COVID-19 patient
toy	2693	1167	S1	CATAAGCTCATGAGAA-1	Sample 1_nCoV 1 scRNA-seq [SW103]	GSM4509011	63	PBMC	M	COVID-19 patient	severe COVID-19 patient	7.50093	2576	1166	Classical monocytes	Monocytes	severe COVID-19 patient
toy	6532	1730	S1	CATAAGCTCCCAATAG-1	Sample 1_nCoV 1 scRNA-seq [SW103]	GSM4509011	63	PBMC	M	COVID-19 patient	severe COVID-19 patient	8.63442	2827	1148	Naive B cells	B cells	severe COVID-19 patient
toy	18237	3806	S1	CATACAGAGAACAAGG-1	Sample 1_nCoV 1 scRNA-seq [SW103]	GSM4509011	63	PBMC	M	COVID-19 patient	severe COVID-19 patient	6.43198	2540	1097	Classical monocytes	Monocytes	severe COVID-19 patient
toy	4941	1475	S1	CATACAGAGGCGAAGG-1	Sample 1_nCoV 1 scRNA-seq [SW103]	GSM4509011	63	PBMC	M	COVID-19 patient	severe COVID-19 patient	9.53248	2957	1343	Naive B cells	B cells	severe COVID-19 patient
toy	11730	3263	S1	CATACAGAGTGTTCCA-1	Sample 1_nCoV 1 scRNA-seq [SW103]	GSM4509011	63	PBMC	M	COVID-19 patient	severe COVID-19 patient	7.90281	2476	1170	Intermediate monocytes	NA	severe COVID-19 patient
toy	7952	2425	S1	CATACAGCAGCAGTAG-1	Sample 1_nCoV 1 scRNA-seq [SW103]	GSM4509011	63	PBMC	M	COVID-19 patient	severe COVID-19 patient	7.29376	2425	1064	Classical monocytes	Monocytes	severe COVID-19 patient
toy	11718	2402	S1	CATACAGGTAGACGTG-1	Sample 1_nCoV 1 scRNA-seq [SW103]	GSM4509011	63	PBMC	M	COVID-19 patient	severe COVID-19 patient	4.7107	2433	741	Th2 cells	CD4+ T cells	severe COVID-19 patient
toy	3915	1443	S1	CATACAGGTATCTCGA-1	Sample 1_nCoV 1 scRNA-seq [SW103]	GSM4509011	63	PBMC	M	COVID-19 patient	severe COVID-19 patient	8.91443	2839	1435	Classical monocytes	Monocytes	severe COVID-19 patient
toy	17996	4063	S1	CATACCCAGCTTGTGT-1	Sample 1_nCoV 1 scRNA-seq [SW103]	GSM4509011	63	PBMC	M	COVID-19 patient	severe COVID-19 patient	4.5788	2519	1176	Classical monocytes	Monocytes	severe COVID-19 patient
toy	609	327	S1	CATACCCAGGATTTCC-1	Sample 1_nCoV 1 scRNA-seq [SW103]	GSM4509011	63	PBMC	M	COVID-19 patient	severe COVID-19 patient	5.09031	1798	455	Platelets	Platelets	severe COVID-19 patient
toy	4352	1746	S1	CATACCCAGGTCTACT-1	Sample 1_nCoV 1 scRNA-seq [SW103]	GSM4509011	63	PBMC	M	COVID-19 patient	severe COVID-19 patient	7.74357	2981	1705	Natural killer cells	NK cells	severe COVID-19 patient
toy	6425	1718	S1	CATACCCAGTATGAAC-1	Sample 1_nCoV 1 scRNA-seq [SW103]	GSM4509011	63	PBMC	M	COVID-19 patient	severe COVID-19 patient	8.71595	2832	1170	Naive B cells	B cells	severe COVID-19 patient
toy	10296	2405	S1	CATACCCCAACAACAA-1	Sample 1_nCoV 1 scRNA-seq [SW103]	GSM4509011	63	PBMC	M	COVID-19 patient	severe COVID-19 patient	5.86636	2419	807	Central memory CD8 T cells	CD8+ T cells	severe COVID-19 patient
toy	13255	3344	S1	CATACCCCAACCGCTG-1	Sample 1_nCoV 1 scRNA-seq [SW103]	GSM4509011	63	PBMC	M	COVID-19 patient	severe COVID-19 patient	4.93399	2616	1261	Classical monocytes	Monocytes	severe COVID-19 patient
toy	12833	2273	S1	CATACCCCAACGCATT-1	Sample 1_nCoV 1 scRNA-seq [SW103]	GSM4509011	63	PBMC	M	COVID-19 patient	severe COVID-19 patient	9.02361	2472	622	Naive B cells	B cells	severe COVID-19 patient
toy	7733	1852	S1	CATACCCCAAGTTCGT-1	Sample 1_nCoV 1 scRNA-seq [SW103]	GSM4509011	63	PBMC	M	COVID-19 patient	severe COVID-19 patient	7.81068	2410	710	Switched memory B cells	B cells	severe COVID-19 patient
toy	4269	1340	S1	CATACCCCACGGTGTC-1	Sample 1_nCoV 1 scRNA-seq [SW103]	GSM4509011	63	PBMC	M	COVID-19 patient	severe COVID-19 patient	12.0637	2875	1309	Naive B cells	B cells	severe COVID-19 patient
toy	1682	530	S1	CATACCCTCACAGTGT-1	Sample 1_nCoV 1 scRNA-seq [SW103]	GSM4509011	63	PBMC	M	COVID-19 patient	severe COVID-19 patient	7.07491	2195	530	Platelets	Platelets	severe COVID-19 patient
toy	4915	1808	S1	CATACCCTCATCACCC-1	Sample 1_nCoV 1 scRNA-seq [SW103]	GSM4509011	63	PBMC	M	COVID-19 patient	severe COVID-19 patient	8.647	3043	1689	Classical monocytes	Monocytes	severe COVID-19 patient
toy	8022	2484	S1	CATACCCTCCAACCAA-1	Sample 1_nCoV 1 scRNA-seq [SW103]	GSM4509011	63	PBMC	M	COVID-19 patient	severe COVID-19 patient	7.72875	2463	1097	Classical monocytes	Monocytes	severe COVID-19 patient
toy	9613	2725	S1	CATACCCTCGTCGACG-1	Sample 1_nCoV 1 scRNA-seq [SW103]	GSM4509011	63	PBMC	M	COVID-19 patient	severe COVID-19 patient	7.41704	2481	1082	Effector memory CD8 T cells	T cells	severe COVID-19 patient
toy	3768	1436	S1	CATACTTAGCGTTCAT-1	Sample 1_nCoV 1 scRNA-seq [SW103]	GSM4509011	63	PBMC	M	COVID-19 patient	severe COVID-19 patient	11.7569	2851	1423	Classical monocytes	Monocytes	severe COVID-19 patient
toy	8651	1887	S1	CATACTTCACCAGCCA-1	Sample 1_nCoV 1 scRNA-seq [SW103]	GSM4509011	63	PBMC	M	COVID-19 patient	severe COVID-19 patient	11.3513	2407	658	Non-switched memory B cells	B cells	severe COVID-19 patient
toy	6480	1828	S1	CATACTTTCGACATAC-1	Sample 1_nCoV 1 scRNA-seq [SW103]	GSM4509011	63	PBMC	M	COVID-19 patient	severe COVID-19 patient	6.17284	2867	1266	Naive B cells	B cells	severe COVID-19 patient
toy	577	253	S1	CATAGACCACATTCTT-1	Sample 1_nCoV 1 scRNA-seq [SW103]	GSM4509011	63	PBMC	M	COVID-19 patient	severe COVID-19 patient	19.4107	1926	377	HSC_-G-CSF	HSC_-G-CSF	severe COVID-19 patient
toy	9350	2711	S1	CATAGACGTGAGGATC-1	Sample 1_nCoV 1 scRNA-seq [SW103]	GSM4509011	63	PBMC	M	COVID-19 patient	severe COVID-19 patient	7.18717	2378	1003	Classical monocytes	Monocytes	severe COVID-19 patient
toy	15592	3552	S1	CATCAAGAGTAATCCC-1	Sample 1_nCoV 1 scRNA-seq [SW103]	GSM4509011	63	PBMC	M	COVID-19 patient	severe COVID-19 patient	7.17034	2580	1200	Classical monocytes	Monocytes	severe COVID-19 patient
toy	993	236	S1	CATCAAGAGTAGTCAA-1	Sample 1_nCoV 1 scRNA-seq [SW103]	GSM4509011	63	PBMC	M	COVID-19 patient	severe COVID-19 patient	6.54582	2020	314	HSC_-G-CSF	HSC_-G-CSF	severe COVID-19 patient
toy	4244	1334	S1	CATCAAGCAAGTCGTT-1	Sample 1_nCoV 1 scRNA-seq [SW103]	GSM4509011	63	PBMC	M	COVID-19 patient	severe COVID-19 patient	6.29123	2867	1299	Naive B cells	B cells	severe COVID-19 patient
toy	5566	1851	S1	CATCAAGTCCCATAGA-1	Sample 1_nCoV 1 scRNA-seq [SW103]	GSM4509011	63	PBMC	M	COVID-19 patient	severe COVID-19 patient	5.64139	3065	1612	Classical monocytes	Monocytes	severe COVID-19 patient
toy	10181	2924	S1	CATCAAGTCGACGAGA-1	Sample 1_nCoV 1 scRNA-seq [SW103]	GSM4509011	63	PBMC	M	COVID-19 patient	severe COVID-19 patient	7.40595	2483	1131	Classical monocytes	Monocytes	severe COVID-19 patient
toy	5028	1321	S1	CATCAAGTCTGGGCAC-1	Sample 1_nCoV 1 scRNA-seq [SW103]	GSM4509011	63	PBMC	M	COVID-19 patient	severe COVID-19 patient	14.1408	2909	1178	Naive B cells	B cells	severe COVID-19 patient
toy	4634	1606	S1	CATCCACAGGTAAGAG-1	Sample 1_nCoV 1 scRNA-seq [SW103]	GSM4509011	63	PBMC	M	COVID-19 patient	severe COVID-19 patient	14.7605	2995	1546	Natural killer cells	NK cells	severe COVID-19 patient
toy	12685	3182	S1	CATCCACCATAGACTC-1	Sample 1_nCoV 1 scRNA-seq [SW103]	GSM4509011	63	PBMC	M	COVID-19 patient	severe COVID-19 patient	7.34726	2594	1194	Classical monocytes	Monocytes	severe COVID-19 patient
toy	7972	1875	S1	CATCCACGTACAAAGT-1	Sample 1_nCoV 1 scRNA-seq [SW103]	GSM4509011	63	PBMC	M	COVID-19 patient	severe COVID-19 patient	3.82589	2403	708	Naive CD8 T cells	CD4+ T cells	severe COVID-19 patient
toy	2449	1026	S1	CATCCACGTGCGGTAA-1	Sample 1_nCoV 1 scRNA-seq [SW103]	GSM4509011	63	PBMC	M	COVID-19 patient	severe COVID-19 patient	8.90159	2449	1026	Classical monocytes	Monocytes	severe COVID-19 patient
toy	13960	3128	S1	CATCCACGTTCGTTCC-1	Sample 1_nCoV 1 scRNA-seq [SW103]	GSM4509011	63	PBMC	M	COVID-19 patient	severe COVID-19 patient	6.51862	2625	1133	Intermediate monocytes	Monocytes	severe COVID-19 patient
toy	4856	1531	S1	CATCCACTCGCTAAAC-1	Sample 1_nCoV 1 scRNA-seq [SW103]	GSM4509011	63	PBMC	M	COVID-19 patient	severe COVID-19 patient	6.21911	2968	1429	Vd2 gd T cells	T cells	severe COVID-19 patient
toy	2506	628	S1	CATCCCACATCGTCCT-1	Sample 1_nCoV 1 scRNA-seq [SW103]	GSM4509011	63	PBMC	M	COVID-19 patient	severe COVID-19 patient	4.30966	2484	627	Platelets	Platelets	severe COVID-19 patient
toy	582	288	S1	CATCCCAGTAATGATG-1	Sample 1_nCoV 1 scRNA-seq [SW103]	GSM4509011	63	PBMC	M	COVID-19 patient	severe COVID-19 patient	8.76289	1843	412	HSC_-G-CSF	HSC_-G-CSF	severe COVID-19 patient
toy	634	231	S1	CATCCGTAGCAACTTC-1	Sample 1_nCoV 1 scRNA-seq [SW103]	GSM4509011	63	PBMC	M	COVID-19 patient	severe COVID-19 patient	16.4038	1847	380	HSC_-G-CSF	HSC_-G-CSF	severe COVID-19 patient
toy	6848	2333	S1	CATCCGTAGTATGAGT-1	Sample 1_nCoV 1 scRNA-seq [SW103]	GSM4509011	63	PBMC	M	COVID-19 patient	severe COVID-19 patient	5.12558	2824	1528	Classical monocytes	Monocytes	severe COVID-19 patient
toy	4966	1686	S1	CATCCGTCAGGTTCCG-1	Sample 1_nCoV 1 scRNA-seq [SW103]	GSM4509011	63	PBMC	M	COVID-19 patient	severe COVID-19 patient	11.2163	3007	1554	Classical monocytes	Monocytes	severe COVID-19 patient
toy	5135	1619	S1	CATCCGTGTCAAATCC-1	Sample 1_nCoV 1 scRNA-seq [SW103]	GSM4509011	63	PBMC	M	COVID-19 patient	severe COVID-19 patient	9.67868	3023	1477	Central memory CD8 T cells	T cells	severe COVID-19 patient
toy	11385	2323	S1	CATCCGTTCAAGCTTG-1	Sample 1_nCoV 1 scRNA-seq [SW103]	GSM4509011	63	PBMC	M	COVID-19 patient	severe COVID-19 patient	11.401	2432	676	Non-switched memory B cells	B cells	severe COVID-19 patient
toy	10318	2277	S1	CATCCGTTCGAACACT-1	Sample 1_nCoV 1 scRNA-seq [SW103]	GSM4509011	63	PBMC	M	COVID-19 patient	severe COVID-19 patient	5.14635	2390	695	Non-switched memory B cells	B cells	severe COVID-19 patient
toy	8652	2075	S1	CATCGCTAGAATTCAG-1	Sample 1_nCoV 1 scRNA-seq [SW103]	GSM4509011	63	PBMC	M	COVID-19 patient	severe COVID-19 patient	8.0675	2339	687	Naive CD8 T cells	CD8+ T cells	severe COVID-19 patient
toy	916	511	S1	CATCGCTAGGTATTGA-1	Sample 1_nCoV 1 scRNA-seq [SW103]	GSM4509011	63	PBMC	M	COVID-19 patient	severe COVID-19 patient	1.31004	2097	545	Intermediate monocytes	Monocytes	severe COVID-19 patient
toy	10547	2119	S1	CATCGCTCACGCGTCA-1	Sample 1_nCoV 1 scRNA-seq [SW103]	GSM4509011	63	PBMC	M	COVID-19 patient	severe COVID-19 patient	4.55106	2377	624	Th2 cells	CD8+ T cells	severe COVID-19 patient
toy	1069	381	S1	CATCGCTCAGGCACAA-1	Sample 1_nCoV 1 scRNA-seq [SW103]	GSM4509011	63	PBMC	M	COVID-19 patient	severe COVID-19 patient	5.9869	2164	447	HSC_-G-CSF	HSC_-G-CSF	severe COVID-19 patient
toy	4228	1257	S1	CATCGCTGTGTCTTGA-1	Sample 1_nCoV 1 scRNA-seq [SW103]	GSM4509011	63	PBMC	M	COVID-19 patient	severe COVID-19 patient	10.3832	2860	1229	Naive B cells	B cells	severe COVID-19 patient
toy	6269	2103	S1	CATCGCTTCCTTGAAG-1	Sample 1_nCoV 1 scRNA-seq [SW103]	GSM4509011	63	PBMC	M	COVID-19 patient	severe COVID-19 patient	5.77445	2950	1564	Classical monocytes	Monocytes	severe COVID-19 patient
toy	1315	568	S1	CATCGCTTCGAGTCCG-1	Sample 1_nCoV 1 scRNA-seq [SW103]	GSM4509011	63	PBMC	M	COVID-19 patient	severe COVID-19 patient	3.57414	2096	605	Platelets	Platelets	severe COVID-19 patient
toy	9019	2664	S1	CATCGCTTCGTTCAGA-1	Sample 1_nCoV 1 scRNA-seq [SW103]	GSM4509011	63	PBMC	M	COVID-19 patient	severe COVID-19 patient	5.66582	2413	1045	Classical monocytes	Monocytes	severe COVID-19 patient
toy	3162	1275	S1	CATCGGGTCCCAAGCG-1	Sample 1_nCoV 1 scRNA-seq [SW103]	GSM4509011	63	PBMC	M	COVID-19 patient	severe COVID-19 patient	9.26629	2746	1273	Central memory CD8 T cells	CD8+ T cells	severe COVID-19 patient
toy	11745	2345	S1	CATCGGGTCTCTGACC-1	Sample 1_nCoV 1 scRNA-seq [SW103]	GSM4509011	63	PBMC	M	COVID-19 patient	severe COVID-19 patient	6.96467	2419	688	Central memory CD8 T cells	CD8+ T cells	severe COVID-19 patient
toy	9850	2759	S1	CATCGTCCACCCATAA-1	Sample 1_nCoV 1 scRNA-seq [SW103]	GSM4509011	63	PBMC	M	COVID-19 patient	severe COVID-19 patient	7.21827	2477	1097	Classical monocytes	Monocytes	severe COVID-19 patient
toy	13258	3223	S1	CATCGTCGTGGTACAG-1	Sample 1_nCoV 1 scRNA-seq [SW103]	GSM4509011	63	PBMC	M	COVID-19 patient	severe COVID-19 patient	5.9285	2450	925	HSC_CD34+	HSC_CD34+	severe COVID-19 patient
toy	11427	2997	S1	CATGAGTAGCCGGATA-1	Sample 1_nCoV 1 scRNA-seq [SW103]	GSM4509011	63	PBMC	M	COVID-19 patient	severe COVID-19 patient	6.70342	2527	1130	Classical monocytes	Monocytes	severe COVID-19 patient
toy	6522	1656	S1	CATGAGTGTTGCTTGA-1	Sample 1_nCoV 1 scRNA-seq [SW103]	GSM4509011	63	PBMC	M	COVID-19 patient	severe COVID-19 patient	5.18246	2766	1066	Th1 cells	CD4+ T cells	severe COVID-19 patient
toy	5041	1283	S1	CATGCAAAGCTAGAGC-1	Sample 1_nCoV 1 scRNA-seq [SW103]	GSM4509011	63	PBMC	M	COVID-19 patient	severe COVID-19 patient	7.79607	2883	1157	Naive CD4 T cells	CD4+ T cells	severe COVID-19 patient
toy	12012	2464	S1	CATGCAATCTCTCCGA-1	Sample 1_nCoV 1 scRNA-seq [SW103]	GSM4509011	63	PBMC	M	COVID-19 patient	severe COVID-19 patient	7.65901	2476	800	T regulatory cells	CD4+ T cells	severe COVID-19 patient
toy	6424	2068	S1	CATGCCTAGAGCCATG-1	Sample 1_nCoV 1 scRNA-seq [SW103]	GSM4509011	63	PBMC	M	COVID-19 patient	severe COVID-19 patient	9.77584	2878	1477	Classical monocytes	Monocytes	severe COVID-19 patient
toy	20200	3749	S1	CATGCCTAGCACACCC-1	Sample 1_nCoV 1 scRNA-seq [SW103]	GSM4509011	63	PBMC	M	COVID-19 patient	severe COVID-19 patient	8.97525	2423	825	Switched memory B cells	B cells	severe COVID-19 patient
toy	6494	2013	S1	CATGCCTAGTCATTGC-1	Sample 1_nCoV 1 scRNA-seq [SW103]	GSM4509011	63	PBMC	M	COVID-19 patient	severe COVID-19 patient	6.5753	2872	1400	Classical monocytes	Monocytes	severe COVID-19 patient
toy	63753	5687	S1	CATGCCTAGTGAACAT-1	Sample 1_nCoV 1 scRNA-seq [SW103]	GSM4509011	63	PBMC	M	COVID-19 patient	severe COVID-19 patient	4.81546	3050	885	Plasmablasts	B cells	severe COVID-19 patient
toy	3293	239	S1	CATGCCTTCTTTGCTA-1	Sample 1_nCoV 1 scRNA-seq [SW103]	GSM4509011	63	PBMC	M	COVID-19 patient	severe COVID-19 patient	0.212572	2720	222	NA	NA	severe COVID-19 patient
toy	7507	1960	S1	CATGCGGAGGCGTTGA-1	Sample 1_nCoV 1 scRNA-seq [SW103]	GSM4509011	63	PBMC	M	COVID-19 patient	severe COVID-19 patient	8.32556	2457	868	T regulatory cells	CD4+ T cells	severe COVID-19 patient
toy	15289	3660	S1	CATGCGGCAATTGCCA-1	Sample 1_nCoV 1 scRNA-seq [SW103]	GSM4509011	63	PBMC	M	COVID-19 patient	severe COVID-19 patient	8.91491	2595	1245	Classical monocytes	Monocytes	severe COVID-19 patient
toy	4486	1550	S1	CATGCGGCACAAGGTG-1	Sample 1_nCoV 1 scRNA-seq [SW103]	GSM4509011	63	PBMC	M	COVID-19 patient	severe COVID-19 patient	13.9991	2945	1495	Classical monocytes	Monocytes	severe COVID-19 patient
toy	7607	524	S1	CATGCGGTCACAAGAA-1	Sample 1_nCoV 1 scRNA-seq [SW103]	GSM4509011	63	PBMC	M	COVID-19 patient	severe COVID-19 patient	0.828185	3268	206	Erythroblast	Erythroblast	severe COVID-19 patient
toy	6524	1711	S1	CATGCGGTCCGATAAC-1	Sample 1_nCoV 1 scRNA-seq [SW103]	GSM4509011	63	PBMC	M	COVID-19 patient	severe COVID-19 patient	7.9859	2807	1139	Naive B cells	B cells	severe COVID-19 patient
toy	7684	2211	S1	CATGCTCAGAGAGGGC-1	Sample 1_nCoV 1 scRNA-seq [SW103]	GSM4509011	63	PBMC	M	COVID-19 patient	severe COVID-19 patient	17.7902	2442	926	Classical monocytes	Monocytes	severe COVID-19 patient
toy	5770	1509	S1	CATGCTCAGCCTTTCC-1	Sample 1_nCoV 1 scRNA-seq [SW103]	GSM4509011	63	PBMC	M	COVID-19 patient	severe COVID-19 patient	6.60312	2909	1214	Naive B cells	B cells	severe COVID-19 patient
toy	10177	2611	S1	CATGCTCCACCTAAAC-1	Sample 1_nCoV 1 scRNA-seq [SW103]	GSM4509011	63	PBMC	M	COVID-19 patient	severe COVID-19 patient	6.5933	2389	863	Switched memory B cells	B cells	severe COVID-19 patient
toy	5967	1834	S1	CATGCTCGTCCTCCAT-1	Sample 1_nCoV 1 scRNA-seq [SW103]	GSM4509011	63	PBMC	M	COVID-19 patient	severe COVID-19 patient	8.46321	2937	1401	Effector memory CD8 T cells	T cells	severe COVID-19 patient
toy	13484	3112	S1	CATGCTCTCGAACTCA-1	Sample 1_nCoV 1 scRNA-seq [SW103]	GSM4509011	63	PBMC	M	COVID-19 patient	severe COVID-19 patient	3.96767	2598	1168	Classical monocytes	Monocytes	severe COVID-19 patient
toy	2399	1043	S1	CATGCTCTCGCCAACG-1	Sample 1_nCoV 1 scRNA-seq [SW103]	GSM4509011	63	PBMC	M	COVID-19 patient	severe COVID-19 patient	12.6719	2408	1043	Classical monocytes	Monocytes	severe COVID-19 patient
toy	1965	990	S1	CATGGATAGGCTCTCG-1	Sample 1_nCoV 1 scRNA-seq [SW103]	GSM4509011	63	PBMC	M	COVID-19 patient	severe COVID-19 patient	7.63359	2204	990	Classical monocytes	Monocytes	severe COVID-19 patient
toy	7811	2270	S1	CATGGATAGTCTTGGT-1	Sample 1_nCoV 1 scRNA-seq [SW103]	GSM4509011	63	PBMC	M	COVID-19 patient	severe COVID-19 patient	7.64307	2410	991	Classical monocytes	Monocytes	severe COVID-19 patient
toy	7679	2330	S1	CATGGATGTACAGTTC-1	Sample 1_nCoV 1 scRNA-seq [SW103]	GSM4509011	63	PBMC	M	COVID-19 patient	severe COVID-19 patient	4.36255	2420	1021	Classical monocytes	Monocytes	severe COVID-19 patient
toy	5007	1579	S1	CATGGATGTATCGAAA-1	Sample 1_nCoV 1 scRNA-seq [SW103]	GSM4509011	63	PBMC	M	COVID-19 patient	severe COVID-19 patient	8.94747	2975	1455	Th1 cells	CD4+ T cells	severe COVID-19 patient
toy	7313	2378	S1	CATGGATTCCGTCAAA-1	Sample 1_nCoV 1 scRNA-seq [SW103]	GSM4509011	63	PBMC	M	COVID-19 patient	severe COVID-19 patient	8.81991	2523	1187	Intermediate monocytes	NA	severe COVID-19 patient
toy	5720	1794	S1	CATGGTAGTCACTACA-1	Sample 1_nCoV 1 scRNA-seq [SW103]	GSM4509011	63	PBMC	M	COVID-19 patient	severe COVID-19 patient	11.9406	3033	1516	Vd2 gd T cells	T cells	severe COVID-19 patient
toy	826	434	S1	CATGGTAGTGGTGATG-1	Sample 1_nCoV 1 scRNA-seq [SW103]	GSM4509011	63	PBMC	M	COVID-19 patient	severe COVID-19 patient	12.5908	2026	483	NA	NA	severe COVID-19 patient
toy	1387	697	S1	CATTCATAGTTCACTG-1	Sample 1_nCoV 1 scRNA-seq [SW103]	GSM4509011	63	PBMC	M	COVID-19 patient	severe COVID-19 patient	4.03749	2070	702	Central memory CD8 T cells	CD8+ T cells	severe COVID-19 patient
toy	15931	3407	S1	CATTCATCAGATTAAG-1	Sample 1_nCoV 1 scRNA-seq [SW103]	GSM4509011	63	PBMC	M	COVID-19 patient	severe COVID-19 patient	8.29829	2502	1032	Classical monocytes	Monocytes	severe COVID-19 patient
toy	10008	2478	S1	CATTCATGTACAACGG-1	Sample 1_nCoV 1 scRNA-seq [SW103]	GSM4509011	63	PBMC	M	COVID-19 patient	severe COVID-19 patient	5.33573	2433	899	Th1/Th17 cells	CD4+ T cells	severe COVID-19 patient
toy	5297	1869	S1	CATTCATGTCGGAAAC-1	Sample 1_nCoV 1 scRNA-seq [SW103]	GSM4509011	63	PBMC	M	COVID-19 patient	severe COVID-19 patient	8.36322	3116	1685	Natural killer cells	NK cells	severe COVID-19 patient
toy	4371	1629	S1	CATTCATGTGTTGCCG-1	Sample 1_nCoV 1 scRNA-seq [SW103]	GSM4509011	63	PBMC	M	COVID-19 patient	severe COVID-19 patient	9.26561	2957	1607	Classical monocytes	Monocytes	severe COVID-19 patient
toy	930	398	S1	CATTCATGTTGAGAGC-1	Sample 1_nCoV 1 scRNA-seq [SW103]	GSM4509011	63	PBMC	M	COVID-19 patient	severe COVID-19 patient	6.98925	2053	481	Platelets	Platelets	severe COVID-19 patient
toy	7428	2042	S1	CATTCATTCCGAGAAG-1	Sample 1_nCoV 1 scRNA-seq [SW103]	GSM4509011	63	PBMC	M	COVID-19 patient	severe COVID-19 patient	5.81583	2481	939	Vd2 gd T cells	T cells	severe COVID-19 patient
toy	7920	2401	S1	CATTCATTCTCTCGAC-1	Sample 1_nCoV 1 scRNA-seq [SW103]	GSM4509011	63	PBMC	M	COVID-19 patient	severe COVID-19 patient	4.68434	2436	1072	Classical monocytes	Monocytes	severe COVID-19 patient
toy	23302	4539	S1	CATTCCGAGAGTAACT-1	Sample 1_nCoV 1 scRNA-seq [SW103]	GSM4509011	63	PBMC	M	COVID-19 patient	severe COVID-19 patient	4.69488	2432	1092	Classical monocytes	Monocytes	severe COVID-19 patient
toy	3153	1215	S1	CATTCCGCAAGCGAAC-1	Sample 1_nCoV 1 scRNA-seq [SW103]	GSM4509011	63	PBMC	M	COVID-19 patient	severe COVID-19 patient	18.3952	2723	1214	Classical monocytes	Monocytes	severe COVID-19 patient
toy	3556	1390	S1	CATTCCGGTCTCCCTA-1	Sample 1_nCoV 1 scRNA-seq [SW103]	GSM4509011	63	PBMC	M	COVID-19 patient	severe COVID-19 patient	9.36445	2838	1385	Classical monocytes	Monocytes	severe COVID-19 patient
toy	642	313	S1	CATTCCGTCCTCACTG-1	Sample 1_nCoV 1 scRNA-seq [SW103]	GSM4509011	63	PBMC	M	COVID-19 patient	severe COVID-19 patient	3.58255	1860	440	Platelets	Platelets	severe COVID-19 patient
toy	4565	1458	S1	CATTCCGTCTGGTGCG-1	Sample 1_nCoV 1 scRNA-seq [SW103]	GSM4509011	63	PBMC	M	COVID-19 patient	severe COVID-19 patient	8.54326	2941	1402	Central memory CD8 T cells	T cells	severe COVID-19 patient
toy	3402	1117	S1	CATTCTAAGTGCAGGT-1	Sample 1_nCoV 1 scRNA-seq [SW103]	GSM4509011	63	PBMC	M	COVID-19 patient	severe COVID-19 patient	6.43739	2766	1116	Naive B cells	B cells	severe COVID-19 patient
toy	3893	1597	S1	CATTCTACACAGACGA-1	Sample 1_nCoV 1 scRNA-seq [SW103]	GSM4509011	63	PBMC	M	COVID-19 patient	severe COVID-19 patient	9.01618	2903	1586	Natural killer cells	NK cells	severe COVID-19 patient
toy	6992	1949	S1	CATTGAGCAGACGCTC-1	Sample 1_nCoV 1 scRNA-seq [SW103]	GSM4509011	63	PBMC	M	COVID-19 patient	severe COVID-19 patient	5.83524	2686	1117	Non-switched memory B cells	B cells	severe COVID-19 patient
toy	6651	1915	S1	CATTGAGCATCTCATT-1	Sample 1_nCoV 1 scRNA-seq [SW103]	GSM4509011	63	PBMC	M	COVID-19 patient	severe COVID-19 patient	6.55541	2827	1260	Non-switched memory B cells	B cells	severe COVID-19 patient
toy	4044	1541	S1	CATTGAGGTCAAGCGA-1	Sample 1_nCoV 1 scRNA-seq [SW103]	GSM4509011	63	PBMC	M	COVID-19 patient	severe COVID-19 patient	7.04748	2861	1525	Classical monocytes	Monocytes	severe COVID-19 patient
toy	9711	2139	S1	CATTGAGGTCTAATCG-1	Sample 1_nCoV 1 scRNA-seq [SW103]	GSM4509011	63	PBMC	M	COVID-19 patient	severe COVID-19 patient	8.35135	2412	697	Non-switched memory B cells	B cells	severe COVID-19 patient
toy	7418	1763	S1	CATTGAGGTGATTGGG-1	Sample 1_nCoV 1 scRNA-seq [SW103]	GSM4509011	63	PBMC	M	COVID-19 patient	severe COVID-19 patient	4.94743	2489	791	Follicular helper T cells	CD4+ T cells	severe COVID-19 patient
toy	608	259	S1	CATTGAGTCGACATCA-1	Sample 1_nCoV 1 scRNA-seq [SW103]	GSM4509011	63	PBMC	M	COVID-19 patient	severe COVID-19 patient	14.4737	1942	364	HSC_-G-CSF	HSC_-G-CSF	severe COVID-19 patient
toy	3971	1268	S1	CATTGCCAGGCTCTCG-1	Sample 1_nCoV 1 scRNA-seq [SW103]	GSM4509011	63	PBMC	M	COVID-19 patient	severe COVID-19 patient	11.7854	2826	1256	Non-switched memory B cells	B cells	severe COVID-19 patient
toy	4603	1490	S1	CATTGCCCAACCCGCA-1	Sample 1_nCoV 1 scRNA-seq [SW103]	GSM4509011	63	PBMC	M	COVID-19 patient	severe COVID-19 patient	9.12448	2956	1434	Terminal effector CD8 T cells	CD8+ T cells	severe COVID-19 patient
toy	615	279	S1	CATTGCCCAACTGCTA-1	Sample 1_nCoV 1 scRNA-seq [SW103]	GSM4509011	63	PBMC	M	COVID-19 patient	severe COVID-19 patient	9.7561	1897	399	HSC_-G-CSF	HSC_-G-CSF	severe COVID-19 patient
toy	10090	2811	S1	CATTGCCCAGAGGAAA-1	Sample 1_nCoV 1 scRNA-seq [SW103]	GSM4509011	63	PBMC	M	COVID-19 patient	severe COVID-19 patient	6.25372	2501	1091	Classical monocytes	Monocytes	severe COVID-19 patient
toy	3990	1477	S1	CATTGCCGTCCCAAAT-1	Sample 1_nCoV 1 scRNA-seq [SW103]	GSM4509011	63	PBMC	M	COVID-19 patient	severe COVID-19 patient	15.8897	2876	1464	Natural killer cells	NK cells	severe COVID-19 patient
toy	11028	3201	S1	CATTGCCGTTCCACAA-1	Sample 1_nCoV 1 scRNA-seq [SW103]	GSM4509011	63	PBMC	M	COVID-19 patient	severe COVID-19 patient	6.90062	2559	1254	Classical monocytes	Monocytes	severe COVID-19 patient
toy	15360	3507	S1	CATTGCCGTTTCGCTC-1	Sample 1_nCoV 1 scRNA-seq [SW103]	GSM4509011	63	PBMC	M	COVID-19 patient	severe COVID-19 patient	5.3776	2548	1072	Vd2 gd T cells	T cells	severe COVID-19 patient
toy	1984	888	S1	CATTGTTAGAGTCTTC-1	Sample 1_nCoV 1 scRNA-seq [SW103]	GSM4509011	63	PBMC	M	COVID-19 patient	severe COVID-19 patient	11.4415	2216	888	Classical monocytes	Monocytes	severe COVID-19 patient
toy	595	243	S1	CATTGTTAGCAACTCT-1	Sample 1_nCoV 1 scRNA-seq [SW103]	GSM4509011	63	PBMC	M	COVID-19 patient	severe COVID-19 patient	14.958	1902	369	Platelets	Platelets	severe COVID-19 patient
toy	4916	1458	S1	CATTGTTGTATGGTTC-1	Sample 1_nCoV 1 scRNA-seq [SW103]	GSM4509011	63	PBMC	M	COVID-19 patient	severe COVID-19 patient	6.40765	2945	1339	Naive B cells	B cells	severe COVID-19 patient
toy	5592	1602	S1	CATTTCAAGTGTCATC-1	Sample 1_nCoV 1 scRNA-seq [SW103]	GSM4509011	63	PBMC	M	COVID-19 patient	severe COVID-19 patient	8.92346	2992	1364	Naive B cells	B cells	severe COVID-19 patient
toy	12517	3324	S1	CATTTCACATCGGAAG-1	Sample 1_nCoV 1 scRNA-seq [SW103]	GSM4509011	63	PBMC	M	COVID-19 patient	severe COVID-19 patient	6.12767	2461	1096	Naive B cells	Monocytes	severe COVID-19 patient
toy	7808	1928	S1	CATTTCACATTCATCT-1	Sample 1_nCoV 1 scRNA-seq [SW103]	GSM4509011	63	PBMC	M	COVID-19 patient	severe COVID-19 patient	7.49232	2440	785	Th2 cells	CD4+ T cells	severe COVID-19 patient
toy	6732	2064	S1	CATTTCATCCTGTAAG-1	Sample 1_nCoV 1 scRNA-seq [SW103]	GSM4509011	63	PBMC	M	COVID-19 patient	severe COVID-19 patient	7.73916	2779	1318	Classical monocytes	Monocytes	severe COVID-19 patient
toy	489	242	S1	CATTTCATCTCGAACA-1	Sample 1_nCoV 1 scRNA-seq [SW103]	GSM4509011	63	PBMC	M	COVID-19 patient	severe COVID-19 patient	14.1104	1822	394	HSC_-G-CSF	HSC_-G-CSF	severe COVID-19 patient
toy	1434	376	S1	CCAAGCGAGGACATCG-1	Sample 1_nCoV 1 scRNA-seq [SW103]	GSM4509011	63	PBMC	M	COVID-19 patient	severe COVID-19 patient	4.11437	2174	389	Platelets	Platelets	severe COVID-19 patient
toy	444	225	S1	CCAAGCGGTTGCGTAT-1	Sample 1_nCoV 1 scRNA-seq [SW103]	GSM4509011	63	PBMC	M	COVID-19 patient	severe COVID-19 patient	2.92793	1833	370	HSC_-G-CSF	HSC_-G-CSF	severe COVID-19 patient
toy	11841	3007	S1	CCAAGCGTCGACGCTG-1	Sample 1_nCoV 1 scRNA-seq [SW103]	GSM4509011	63	PBMC	M	COVID-19 patient	severe COVID-19 patient	8.09898	2544	1125	Classical monocytes	Monocytes	severe COVID-19 patient
toy	8422	1945	S1	CCAATGAAGCTGAGCA-1	Sample 1_nCoV 1 scRNA-seq [SW103]	GSM4509011	63	PBMC	M	COVID-19 patient	severe COVID-19 patient	5.20066	2416	714	Naive CD4 T cells	CD4+ T cells	severe COVID-19 patient
toy	4635	1319	S1	CCAATGAAGTGGAAGA-1	Sample 1_nCoV 1 scRNA-seq [SW103]	GSM4509011	63	PBMC	M	COVID-19 patient	severe COVID-19 patient	6.32147	2901	1257	Naive B cells	B cells	severe COVID-19 patient
toy	2643	1138	S1	CCAATGACAGCTACAT-1	Sample 1_nCoV 1 scRNA-seq [SW103]	GSM4509011	63	PBMC	M	COVID-19 patient	severe COVID-19 patient	11.9183	2568	1138	Classical monocytes	Monocytes	severe COVID-19 patient
toy	3149	1254	S1	CCAATGAGTAGATCGG-1	Sample 1_nCoV 1 scRNA-seq [SW103]	GSM4509011	63	PBMC	M	COVID-19 patient	severe COVID-19 patient	6.47825	2741	1253	Classical monocytes	Monocytes	severe COVID-19 patient
toy	5183	1999	S1	CCAATGAGTTCTCTAT-1	Sample 1_nCoV 1 scRNA-seq [SW103]	GSM4509011	63	PBMC	M	COVID-19 patient	severe COVID-19 patient	5.9618	3138	1835	Natural killer cells	NK cells	severe COVID-19 patient
toy	2038	777	S1	CCAATGATCTTCCTAA-1	Sample 1_nCoV 1 scRNA-seq [SW103]	GSM4509011	63	PBMC	M	COVID-19 patient	severe COVID-19 patient	3.28754	2226	775	Platelets	Platelets	severe COVID-19 patient
toy	7976	2581	S1	CCAATTTGTTCGTTCC-1	Sample 1_nCoV 1 scRNA-seq [SW103]	GSM4509011	63	PBMC	M	COVID-19 patient	severe COVID-19 patient	8.1996	2414	1117	Classical monocytes	Monocytes	severe COVID-19 patient
toy	6449	1994	S1	CCAATTTTCTGGTGGC-1	Sample 1_nCoV 1 scRNA-seq [SW103]	GSM4509011	63	PBMC	M	COVID-19 patient	severe COVID-19 patient	10.9784	2866	1402	Classical monocytes	Monocytes	severe COVID-19 patient
toy	2012	817	S1	CCACAAAAGAGAGTTT-1	Sample 1_nCoV 1 scRNA-seq [SW103]	GSM4509011	63	PBMC	M	COVID-19 patient	severe COVID-19 patient	11.3817	2262	817	Th1 cells	CD4+ T cells	severe COVID-19 patient
toy	2949	1078	S1	CCACAAAAGTGTGTTC-1	Sample 1_nCoV 1 scRNA-seq [SW103]	GSM4509011	63	PBMC	M	COVID-19 patient	severe COVID-19 patient	9.73211	2656	1077	Naive B cells	B cells	severe COVID-19 patient
toy	11594	3192	S1	CCACAAACAGTCGCAC-1	Sample 1_nCoV 1 scRNA-seq [SW103]	GSM4509011	63	PBMC	M	COVID-19 patient	severe COVID-19 patient	5.6926	2585	1273	Classical monocytes	Monocytes	severe COVID-19 patient
toy	4731	1380	S1	CCACAAACAGTCGGTC-1	Sample 1_nCoV 1 scRNA-seq [SW103]	GSM4509011	63	PBMC	M	COVID-19 patient	severe COVID-19 patient	7.71507	2935	1305	Non-switched memory B cells	B cells	severe COVID-19 patient
toy	6329	1867	S1	CCACAAACATATGCGT-1	Sample 1_nCoV 1 scRNA-seq [SW103]	GSM4509011	63	PBMC	M	COVID-19 patient	severe COVID-19 patient	9.21157	2840	1338	Classical monocytes	Monocytes	severe COVID-19 patient
toy	8440	2352	S1	CCACAAAGTGTTCGTA-1	Sample 1_nCoV 1 scRNA-seq [SW103]	GSM4509011	63	PBMC	M	COVID-19 patient	severe COVID-19 patient	6.27962	2439	949	Classical monocytes	Monocytes	severe COVID-19 patient
toy	11720	2470	S1	CCACAAATCATAGCAC-1	Sample 1_nCoV 1 scRNA-seq [SW103]	GSM4509011	63	PBMC	M	COVID-19 patient	severe COVID-19 patient	0.119454	3458	1166	Platelets	Platelets	severe COVID-19 patient
toy	4930	1434	S1	CCACACTAGGCAGGGA-1	Sample 1_nCoV 1 scRNA-seq [SW103]	GSM4509011	63	PBMC	M	COVID-19 patient	severe COVID-19 patient	5.11156	2959	1317	Naive B cells	B cells	severe COVID-19 patient
toy	3529	1384	S1	CCACACTCAATATCCG-1	Sample 1_nCoV 1 scRNA-seq [SW103]	GSM4509011	63	PBMC	M	COVID-19 patient	severe COVID-19 patient	5.35562	2834	1380	Classical monocytes	Monocytes	severe COVID-19 patient
toy	4315	1749	S1	CCACACTCACCCTATC-1	Sample 1_nCoV 1 scRNA-seq [SW103]	GSM4509011	63	PBMC	M	COVID-19 patient	severe COVID-19 patient	5.51564	2996	1709	Natural killer cells	NK cells	severe COVID-19 patient
toy	9191	2764	S1	CCACACTCACTTGTCC-1	Sample 1_nCoV 1 scRNA-seq [SW103]	GSM4509011	63	PBMC	M	COVID-19 patient	severe COVID-19 patient	6.46284	2472	1124	Classical monocytes	Monocytes	severe COVID-19 patient
toy	1529	716	S1	CCACCATAGACGCAGT-1	Sample 1_nCoV 1 scRNA-seq [SW103]	GSM4509011	63	PBMC	M	COVID-19 patient	severe COVID-19 patient	18.051	2106	715	NA	Monocytes	severe COVID-19 patient
toy	9106	2305	S1	CCACCATGTCATGCAT-1	Sample 1_nCoV 1 scRNA-seq [SW103]	GSM4509011	63	PBMC	M	COVID-19 patient	severe COVID-19 patient	6.74281	2377	759	Non-switched memory B cells	B cells	severe COVID-19 patient
toy	1943	740	S1	CCACCATTCATGCTAG-1	Sample 1_nCoV 1 scRNA-seq [SW103]	GSM4509011	63	PBMC	M	COVID-19 patient	severe COVID-19 patient	2.83067	2253	740	NA	NA	severe COVID-19 patient
toy	528	229	S1	CCACGAGAGACTGAGC-1	Sample 1_nCoV 1 scRNA-seq [SW103]	GSM4509011	63	PBMC	M	COVID-19 patient	severe COVID-19 patient	12.8788	1900	354	Progenitor cells	NA	severe COVID-19 patient
toy	11232	2890	S1	CCACGAGAGTAATACG-1	Sample 1_nCoV 1 scRNA-seq [SW103]	GSM4509011	63	PBMC	M	COVID-19 patient	severe COVID-19 patient	8.57372	2527	1091	Classical monocytes	Monocytes	severe COVID-19 patient
toy	8938	1945	S1	CCACGAGCAACCCGCA-1	Sample 1_nCoV 1 scRNA-seq [SW103]	GSM4509011	63	PBMC	M	COVID-19 patient	severe COVID-19 patient	9.35332	2414	682	Exhausted B cells	B cells	severe COVID-19 patient
toy	12925	3039	S1	CCACGAGCATCACAGT-1	Sample 1_nCoV 1 scRNA-seq [SW103]	GSM4509011	63	PBMC	M	COVID-19 patient	severe COVID-19 patient	6.14313	2467	895	HSC_CD34+	HSC_CD34+	severe COVID-19 patient
toy	6407	2151	S1	CCACGAGGTGAATGTA-1	Sample 1_nCoV 1 scRNA-seq [SW103]	GSM4509011	63	PBMC	M	COVID-19 patient	severe COVID-19 patient	7.77275	2923	1552	Classical monocytes	Monocytes	severe COVID-19 patient
toy	6695	1549	S1	CCACGTTGTAACTTCG-1	Sample 1_nCoV 1 scRNA-seq [SW103]	GSM4509011	63	PBMC	M	COVID-19 patient	severe COVID-19 patient	7.55788	2727	960	Naive B cells	B cells	severe COVID-19 patient
toy	3064	905	S1	CCACGTTGTCGAGTTT-1	Sample 1_nCoV 1 scRNA-seq [SW103]	GSM4509011	63	PBMC	M	COVID-19 patient	severe COVID-19 patient	5.45039	2691	905	Platelets	Platelets	severe COVID-19 patient
toy	2587	1067	S1	CCACGTTGTCGTCTCT-1	Sample 1_nCoV 1 scRNA-seq [SW103]	GSM4509011	63	PBMC	M	COVID-19 patient	severe COVID-19 patient	9.47043	2536	1066	Classical monocytes	Monocytes	severe COVID-19 patient
toy	3780	247	S1	CCACGTTTCTACACTT-1	Sample 1_nCoV 1 scRNA-seq [SW103]	GSM4509011	63	PBMC	M	COVID-19 patient	severe COVID-19 patient	0.952381	2848	224	Non-switched memory B cells	NA	severe COVID-19 patient
toy	5085	1744	S1	CCACTTGAGCATGCAG-1	Sample 1_nCoV 1 scRNA-seq [SW103]	GSM4509011	63	PBMC	M	COVID-19 patient	severe COVID-19 patient	11.5831	3038	1617	Classical monocytes	Monocytes	severe COVID-19 patient
toy	11103	2391	S1	CCACTTGCAATTGTGC-1	Sample 1_nCoV 1 scRNA-seq [SW103]	GSM4509011	63	PBMC	M	COVID-19 patient	severe COVID-19 patient	6.04341	2380	702	Central memory CD8 T cells	CD8+ T cells	severe COVID-19 patient
toy	17994	3717	S1	CCACTTGCACCGAATT-1	Sample 1_nCoV 1 scRNA-seq [SW103]	GSM4509011	63	PBMC	M	COVID-19 patient	severe COVID-19 patient	10.5924	2490	1021	Classical monocytes	Monocytes	severe COVID-19 patient
toy	8530	2120	S1	CCACTTGCACGTTCGG-1	Sample 1_nCoV 1 scRNA-seq [SW103]	GSM4509011	63	PBMC	M	COVID-19 patient	severe COVID-19 patient	4.09144	2367	757	Naive CD4 T cells	CD4+ T cells	severe COVID-19 patient
toy	5550	1493	S1	CCACTTGCAGGATTCT-1	Sample 1_nCoV 1 scRNA-seq [SW103]	GSM4509011	63	PBMC	M	COVID-19 patient	severe COVID-19 patient	8.30631	2938	1260	Naive B cells	B cells	severe COVID-19 patient
toy	2093	756	S1	CCACTTGCATATGCGT-1	Sample 1_nCoV 1 scRNA-seq [SW103]	GSM4509011	63	PBMC	M	COVID-19 patient	severe COVID-19 patient	3.91782	2257	755	Platelets	Platelets	severe COVID-19 patient
toy	11256	650	S1	CCACTTGTCAATCAGC-1	Sample 1_nCoV 1 scRNA-seq [SW103]	GSM4509011	63	PBMC	M	COVID-19 patient	severe COVID-19 patient	2.29211	3512	215	Erythroblast	Erythroblast	severe COVID-19 patient
toy	6460	1746	S1	CCACTTGTCATACGAC-1	Sample 1_nCoV 1 scRNA-seq [SW103]	GSM4509011	63	PBMC	M	COVID-19 patient	severe COVID-19 patient	7.55418	2824	1219	Th1/Th17 cells	CD4+ T cells	severe COVID-19 patient
toy	536	285	S1	CCACTTGTCTGTTCAT-1	Sample 1_nCoV 1 scRNA-seq [SW103]	GSM4509011	63	PBMC	M	COVID-19 patient	severe COVID-19 patient	7.08955	1782	429	Platelets	Platelets	severe COVID-19 patient
toy	4629	1472	S1	CCATAAGAGATCCCGC-1	Sample 1_nCoV 1 scRNA-seq [SW103]	GSM4509011	63	PBMC	M	COVID-19 patient	severe COVID-19 patient	7.51782	2970	1419	Natural killer cells	NK cells	severe COVID-19 patient
toy	40279	4653	S1	CCATAAGGTACAAAGT-1	Sample 1_nCoV 1 scRNA-seq [SW103]	GSM4509011	63	PBMC	M	COVID-19 patient	severe COVID-19 patient	5.9212	3002	741	Plasmablasts	B cells	severe COVID-19 patient
toy	6110	1929	S1	CCATAAGTCCCGAACG-1	Sample 1_nCoV 1 scRNA-seq [SW103]	GSM4509011	63	PBMC	M	COVID-19 patient	severe COVID-19 patient	10	2934	1479	Classical monocytes	Monocytes	severe COVID-19 patient
toy	9377	2612	S1	CCATCACAGAAGAGCA-1	Sample 1_nCoV 1 scRNA-seq [SW103]	GSM4509011	63	PBMC	M	COVID-19 patient	severe COVID-19 patient	10.2911	2429	1017	Classical monocytes	Monocytes	severe COVID-19 patient
toy	8039	2465	S1	CCATCACAGTCTACCA-1	Sample 1_nCoV 1 scRNA-seq [SW103]	GSM4509011	63	PBMC	M	COVID-19 patient	severe COVID-19 patient	7.88655	2472	1099	Classical monocytes	Monocytes	severe COVID-19 patient
toy	3133	1359	S1	CCATCACCAAAGCTAA-1	Sample 1_nCoV 1 scRNA-seq [SW103]	GSM4509011	63	PBMC	M	COVID-19 patient	severe COVID-19 patient	6.00064	2757	1359	Classical monocytes	Monocytes	severe COVID-19 patient
toy	1007	330	S1	CCATCACGTGAGTAAT-1	Sample 1_nCoV 1 scRNA-seq [SW103]	GSM4509011	63	PBMC	M	COVID-19 patient	severe COVID-19 patient	12.0159	2152	391	HSC_-G-CSF	HSC_-G-CSF	severe COVID-19 patient
toy	10740	2677	S1	CCATCACTCGTAGCTA-1	Sample 1_nCoV 1 scRNA-seq [SW103]	GSM4509011	63	PBMC	M	COVID-19 patient	severe COVID-19 patient	5.32588	2504	1012	Th1/Th17 cells	CD4+ T cells	severe COVID-19 patient
toy	4974	1699	S1	CCCAACTAGCTTGTTG-1	Sample 1_nCoV 1 scRNA-seq [SW103]	GSM4509011	63	PBMC	M	COVID-19 patient	severe COVID-19 patient	8.52433	3003	1561	Non-Vd2 gd T cells	T cells	severe COVID-19 patient
toy	1046	488	S1	CCCAACTGTACAAACA-1	Sample 1_nCoV 1 scRNA-seq [SW103]	GSM4509011	63	PBMC	M	COVID-19 patient	severe COVID-19 patient	12.9063	2109	558	Platelets	Platelets	severe COVID-19 patient
toy	16498	3654	S1	CCCAACTTCATATGGC-1	Sample 1_nCoV 1 scRNA-seq [SW103]	GSM4509011	63	PBMC	M	COVID-19 patient	severe COVID-19 patient	7.59486	2547	1142	Classical monocytes	Monocytes	severe COVID-19 patient
toy	749	410	S1	CCCAACTTCCTCTGCA-1	Sample 1_nCoV 1 scRNA-seq [SW103]	GSM4509011	63	PBMC	M	COVID-19 patient	severe COVID-19 patient	7.0761	1988	459	NA	Dendritic cells	severe COVID-19 patient
toy	4732	1447	S1	CCCATTGAGATTGGGC-1	Sample 1_nCoV 1 scRNA-seq [SW103]	GSM4509011	63	PBMC	M	COVID-19 patient	severe COVID-19 patient	6.25528	2953	1354	Naive B cells	B cells	severe COVID-19 patient
toy	237	206	S1	CCCATTGAGCAAACAT-1	Sample 1_nCoV 1 scRNA-seq [SW103]	GSM4509011	63	PBMC	M	COVID-19 patient	severe COVID-19 patient	4.64135	1644	412	NA	NA	severe COVID-19 patient
toy	4012	259	S1	CCCATTGAGTGGTTAA-1	Sample 1_nCoV 1 scRNA-seq [SW103]	GSM4509011	63	PBMC	M	COVID-19 patient	severe COVID-19 patient	0.348953	2881	222	Erythroblast	Erythroblast	severe COVID-19 patient
toy	719	349	S1	CCCATTGGTGGTCCCA-1	Sample 1_nCoV 1 scRNA-seq [SW103]	GSM4509011	63	PBMC	M	COVID-19 patient	severe COVID-19 patient	4.03338	1930	436	Platelets	Platelets	severe COVID-19 patient
toy	7894	2304	S1	CCCATTGGTTGCATTG-1	Sample 1_nCoV 1 scRNA-seq [SW103]	GSM4509011	63	PBMC	M	COVID-19 patient	severe COVID-19 patient	7.38536	2464	1042	Intermediate monocytes	Monocytes	severe COVID-19 patient
toy	5251	1815	S1	CCCATTGTCAAAGGTA-1	Sample 1_nCoV 1 scRNA-seq [SW103]	GSM4509011	63	PBMC	M	COVID-19 patient	severe COVID-19 patient	8.81737	3055	1623	Classical monocytes	Monocytes	severe COVID-19 patient
toy	376	254	S1	CCCGAAGAGAGTTCGG-1	Sample 1_nCoV 1 scRNA-seq [SW103]	GSM4509011	63	PBMC	M	COVID-19 patient	severe COVID-19 patient	5.85106	1776	394	NA	NA	severe COVID-19 patient
toy	13450	3418	S1	CCCGAAGGTGAGTAGC-1	Sample 1_nCoV 1 scRNA-seq [SW103]	GSM4509011	63	PBMC	M	COVID-19 patient	severe COVID-19 patient	7.73234	2574	1238	Classical monocytes	Monocytes	severe COVID-19 patient
toy	5685	1556	S1	CCCGAAGGTTGGTACT-1	Sample 1_nCoV 1 scRNA-seq [SW103]	GSM4509011	63	PBMC	M	COVID-19 patient	severe COVID-19 patient	4.32718	2941	1265	Naive B cells	B cells	severe COVID-19 patient
toy	11170	3087	S1	CCCGAAGTCTCCGATC-1	Sample 1_nCoV 1 scRNA-seq [SW103]	GSM4509011	63	PBMC	M	COVID-19 patient	severe COVID-19 patient	7.98568	2552	1234	Classical monocytes	Monocytes	severe COVID-19 patient
toy	4090	1324	S1	CCCGGAAAGCACCGTC-1	Sample 1_nCoV 1 scRNA-seq [SW103]	GSM4509011	63	PBMC	M	COVID-19 patient	severe COVID-19 patient	7.28606	2837	1300	Natural killer cells	NK cells	severe COVID-19 patient
toy	14742	3551	S1	CCCGGAAAGTCGAATA-1	Sample 1_nCoV 1 scRNA-seq [SW103]	GSM4509011	63	PBMC	M	COVID-19 patient	severe COVID-19 patient	5.50129	2555	1166	Classical monocytes	Monocytes	severe COVID-19 patient
toy	9057	2005	S1	CCCGGAAAGTTCTACG-1	Sample 1_nCoV 1 scRNA-seq [SW103]	GSM4509011	63	PBMC	M	COVID-19 patient	severe COVID-19 patient	14.5081	2351	638	Th2 cells	CD4+ T cells	severe COVID-19 patient
toy	4695	205	S1	CCCGGAACAATTGGTC-1	Sample 1_nCoV 1 scRNA-seq [SW103]	GSM4509011	63	PBMC	M	COVID-19 patient	severe COVID-19 patient	2.42812	2994	165	Erythroblast	Erythroblast	severe COVID-19 patient
toy	914	359	S1	CCCGGAACAGTTGAAA-1	Sample 1_nCoV 1 scRNA-seq [SW103]	GSM4509011	63	PBMC	M	COVID-19 patient	severe COVID-19 patient	7.43982	2083	429	Platelets	Platelets	severe COVID-19 patient
toy	1862	928	S1	CCCGGAACATCGTGGC-1	Sample 1_nCoV 1 scRNA-seq [SW103]	GSM4509011	63	PBMC	M	COVID-19 patient	severe COVID-19 patient	9.55961	2170	927	Classical monocytes	Monocytes	severe COVID-19 patient
toy	16052	3728	S1	CCCGGAAGTCATACCA-1	Sample 1_nCoV 1 scRNA-seq [SW103]	GSM4509011	63	PBMC	M	COVID-19 patient	severe COVID-19 patient	9.16397	2482	1122	NA	Monocytes	severe COVID-19 patient
toy	6862	1714	S1	CCCGGAATCACCTGTC-1	Sample 1_nCoV 1 scRNA-seq [SW103]	GSM4509011	63	PBMC	M	COVID-19 patient	severe COVID-19 patient	5.26086	2742	1039	Naive CD4 T cells	CD4+ T cells	severe COVID-19 patient
toy	11616	2524	S1	CCCTAACAGACATCCT-1	Sample 1_nCoV 1 scRNA-seq [SW103]	GSM4509011	63	PBMC	M	COVID-19 patient	severe COVID-19 patient	9.61605	2452	769	Non-switched memory B cells	B cells	severe COVID-19 patient
toy	10272	2850	S1	CCCTAACAGACGCAGT-1	Sample 1_nCoV 1 scRNA-seq [SW103]	GSM4509011	63	PBMC	M	COVID-19 patient	severe COVID-19 patient	7.17484	2524	1167	Classical monocytes	Monocytes	severe COVID-19 patient
toy	641	383	S1	CCCTAACCAATCGTCA-1	Sample 1_nCoV 1 scRNA-seq [SW103]	GSM4509011	63	PBMC	M	COVID-19 patient	severe COVID-19 patient	4.9922	1791	503	Platelets	Platelets	severe COVID-19 patient
toy	5794	2102	S1	CCCTAACCACTATCCC-1	Sample 1_nCoV 1 scRNA-seq [SW103]	GSM4509011	63	PBMC	M	COVID-19 patient	severe COVID-19 patient	5.43666	3096	1775	Classical monocytes	Monocytes	severe COVID-19 patient
toy	638	259	S1	CCCTAACCAGTTAGAA-1	Sample 1_nCoV 1 scRNA-seq [SW103]	GSM4509011	63	PBMC	M	COVID-19 patient	severe COVID-19 patient	10.815	1940	373	HSC_-G-CSF	HSC_-G-CSF	severe COVID-19 patient
toy	521	218	S1	CCCTAACCATTCTCTA-1	Sample 1_nCoV 1 scRNA-seq [SW103]	GSM4509011	63	PBMC	M	COVID-19 patient	severe COVID-19 patient	9.98081	1870	351	HSC_-G-CSF	HSC_-G-CSF	severe COVID-19 patient
toy	7924	1925	S1	CCCTAACGTATCCCAA-1	Sample 1_nCoV 1 scRNA-seq [SW103]	GSM4509011	63	PBMC	M	COVID-19 patient	severe COVID-19 patient	8.99798	2409	725	Naive B cells	B cells	severe COVID-19 patient
toy	617	314	S1	CCCTAACGTTGCCGCA-1	Sample 1_nCoV 1 scRNA-seq [SW103]	GSM4509011	63	PBMC	M	COVID-19 patient	severe COVID-19 patient	4.86224	1827	445	Platelets	Platelets	severe COVID-19 patient
toy	7216	1779	S1	CCCTAACGTTGTCATG-1	Sample 1_nCoV 1 scRNA-seq [SW103]	GSM4509011	63	PBMC	M	COVID-19 patient	severe COVID-19 patient	7.22007	2584	897	Naive B cells	B cells	severe COVID-19 patient
toy	4541	1694	S1	CCCTCAACAGCGGTCT-1	Sample 1_nCoV 1 scRNA-seq [SW103]	GSM4509011	63	PBMC	M	COVID-19 patient	severe COVID-19 patient	2.66461	3017	1639	Non-Vd2 gd T cells	NK cells	severe COVID-19 patient
toy	4679	1441	S1	CCCTCAAGTGATGGCA-1	Sample 1_nCoV 1 scRNA-seq [SW103]	GSM4509011	63	PBMC	M	COVID-19 patient	severe COVID-19 patient	8.10002	2936	1365	Naive B cells	B cells	severe COVID-19 patient
toy	7576	1850	S1	CCCTCAAGTTCTCACC-1	Sample 1_nCoV 1 scRNA-seq [SW103]	GSM4509011	63	PBMC	M	COVID-19 patient	severe COVID-19 patient	12.3812	2451	755	Non-switched memory B cells	B cells	severe COVID-19 patient
toy	8579	2342	S1	CCCTCAATCGTAGTGT-1	Sample 1_nCoV 1 scRNA-seq [SW103]	GSM4509011	63	PBMC	M	COVID-19 patient	severe COVID-19 patient	4.79077	2420	911	Effector memory CD8 T cells	T cells	severe COVID-19 patient
toy	317	234	S1	CCCTCAATCTGCTAGA-1	Sample 1_nCoV 1 scRNA-seq [SW103]	GSM4509011	63	PBMC	M	COVID-19 patient	severe COVID-19 patient	16.4038	1709	404	Intermediate monocytes	NA	severe COVID-19 patient
toy	571	359	S1	CCCTCAATCTGGAAGG-1	Sample 1_nCoV 1 scRNA-seq [SW103]	GSM4509011	63	PBMC	M	COVID-19 patient	severe COVID-19 patient	7.18039	1861	445	Myeloid dendritic cells	Dendritic cells	severe COVID-19 patient
toy	3149	1266	S1	CCCTCTCCACGGTGAA-1	Sample 1_nCoV 1 scRNA-seq [SW103]	GSM4509011	63	PBMC	M	COVID-19 patient	severe COVID-19 patient	12.766	2743	1265	Vd2 gd T cells	T cells	severe COVID-19 patient
toy	15410	3735	S1	CCCTCTCTCCTGTAAG-1	Sample 1_nCoV 1 scRNA-seq [SW103]	GSM4509011	63	PBMC	M	COVID-19 patient	severe COVID-19 patient	5.74951	2612	1290	Classical monocytes	Monocytes	severe COVID-19 patient
toy	9569	2094	S1	CCCTCTCTCGGCTTGG-1	Sample 1_nCoV 1 scRNA-seq [SW103]	GSM4509011	63	PBMC	M	COVID-19 patient	severe COVID-19 patient	4.77584	2368	668	Central memory CD8 T cells	CD8+ T cells	severe COVID-19 patient
toy	9482	2036	S1	CCCTGATAGCGAACTG-1	Sample 1_nCoV 1 scRNA-seq [SW103]	GSM4509011	63	PBMC	M	COVID-19 patient	severe COVID-19 patient	8.02573	2386	649	Naive B cells	B cells	severe COVID-19 patient
toy	15828	3961	S1	CCCTGATCACAGAGCA-1	Sample 1_nCoV 1 scRNA-seq [SW103]	GSM4509011	63	PBMC	M	COVID-19 patient	severe COVID-19 patient	11.9282	2543	1239	Natural killer cells	NA	severe COVID-19 patient
toy	8924	2173	S1	CCCTGATCACCTGAAT-1	Sample 1_nCoV 1 scRNA-seq [SW103]	GSM4509011	63	PBMC	M	COVID-19 patient	severe COVID-19 patient	6.36486	2406	807	Th17 cells	CD4+ T cells	severe COVID-19 patient
toy	4694	1478	S1	CCCTGATCACTTGTGA-1	Sample 1_nCoV 1 scRNA-seq [SW103]	GSM4509011	63	PBMC	M	COVID-19 patient	severe COVID-19 patient	6.732	2967	1404	Naive B cells	B cells	severe COVID-19 patient
toy	468	269	S1	CCCTGATTCCGCAACG-1	Sample 1_nCoV 1 scRNA-seq [SW103]	GSM4509011	63	PBMC	M	COVID-19 patient	severe COVID-19 patient	11.3248	1838	419	HSC_-G-CSF	HSC_-G-CSF	severe COVID-19 patient
toy	7902	2360	S1	CCCTGATTCCGCAGTG-1	Sample 1_nCoV 1 scRNA-seq [SW103]	GSM4509011	63	PBMC	M	COVID-19 patient	severe COVID-19 patient	10.6682	2375	958	Classical monocytes	Monocytes	severe COVID-19 patient
toy	6668	1609	S1	CCCTGATTCGCCGTGA-1	Sample 1_nCoV 1 scRNA-seq [SW103]	GSM4509011	63	PBMC	M	COVID-19 patient	severe COVID-19 patient	4.82903	2730	1000	Naive CD4 T cells	CD4+ T cells	severe COVID-19 patient
toy	3495	1447	S1	CCCTGATTCGGCTCTT-1	Sample 1_nCoV 1 scRNA-seq [SW103]	GSM4509011	63	PBMC	M	COVID-19 patient	severe COVID-19 patient	11.8741	2847	1446	Classical monocytes	Monocytes	severe COVID-19 patient
toy	1496	463	S1	CCCTTAGAGGCGTTAG-1	Sample 1_nCoV 1 scRNA-seq [SW103]	GSM4509011	63	PBMC	M	COVID-19 patient	severe COVID-19 patient	8.4893	2160	491	Platelets	Platelets	severe COVID-19 patient
toy	5925	1657	S1	CCCTTAGCAAATCCCA-1	Sample 1_nCoV 1 scRNA-seq [SW103]	GSM4509011	63	PBMC	M	COVID-19 patient	severe COVID-19 patient	10.3122	2946	1311	Naive B cells	B cells	severe COVID-19 patient
toy	4882	1787	S1	CCGAACGCAACACACT-1	Sample 1_nCoV 1 scRNA-seq [SW103]	GSM4509011	63	PBMC	M	COVID-19 patient	severe COVID-19 patient	9.5043	3051	1698	Classical monocytes	Monocytes	severe COVID-19 patient
toy	11993	3106	S1	CCGAACGCACATTCTT-1	Sample 1_nCoV 1 scRNA-seq [SW103]	GSM4509011	63	PBMC	M	COVID-19 patient	severe COVID-19 patient	5.23639	2565	1173	Classical monocytes	Monocytes	severe COVID-19 patient
toy	14207	3367	S1	CCGAACGCAGCCGGTT-1	Sample 1_nCoV 1 scRNA-seq [SW103]	GSM4509011	63	PBMC	M	COVID-19 patient	severe COVID-19 patient	6.84874	2614	1209	Classical monocytes	Monocytes	severe COVID-19 patient
toy	8864	2171	S1	CCGAACGGTGTGAGCA-1	Sample 1_nCoV 1 scRNA-seq [SW103]	GSM4509011	63	PBMC	M	COVID-19 patient	severe COVID-19 patient	6.15975	2357	742	Th2 cells	CD4+ T cells	severe COVID-19 patient
toy	5957	2084	S1	CCGAACGTCACCGGGT-1	Sample 1_nCoV 1 scRNA-seq [SW103]	GSM4509011	63	PBMC	M	COVID-19 patient	severe COVID-19 patient	5.82508	3039	1668	Central memory CD8 T cells	T cells	severe COVID-19 patient
toy	7459	1760	S1	CCGAACGTCCAAACCA-1	Sample 1_nCoV 1 scRNA-seq [SW103]	GSM4509011	63	PBMC	M	COVID-19 patient	severe COVID-19 patient	2.85561	2473	759	Naive CD4 T cells	CD4+ T cells	severe COVID-19 patient
toy	16330	3413	S1	CCGAACGTCCCAAGCG-1	Sample 1_nCoV 1 scRNA-seq [SW103]	GSM4509011	63	PBMC	M	COVID-19 patient	severe COVID-19 patient	7.08512	2579	1054	Intermediate monocytes	Monocytes	severe COVID-19 patient
toy	3658	1207	S1	CCGAACGTCGAAGAAT-1	Sample 1_nCoV 1 scRNA-seq [SW103]	GSM4509011	63	PBMC	M	COVID-19 patient	severe COVID-19 patient	8.47458	2804	1197	Naive B cells	B cells	severe COVID-19 patient
toy	1336	674	S1	CCGAACGTCTGGTGCG-1	Sample 1_nCoV 1 scRNA-seq [SW103]	GSM4509011	63	PBMC	M	COVID-19 patient	severe COVID-19 patient	12.0509	2100	681	Classical monocytes	Monocytes	severe COVID-19 patient
toy	5801	1696	S1	CCGATCTAGACAACAT-1	Sample 1_nCoV 1 scRNA-seq [SW103]	GSM4509011	63	PBMC	M	COVID-19 patient	severe COVID-19 patient	8.82606	2967	1385	Vd2 gd T cells	T cells	severe COVID-19 patient
toy	2380	1010	S1	CCGATCTCAGGTTACT-1	Sample 1_nCoV 1 scRNA-seq [SW103]	GSM4509011	63	PBMC	M	COVID-19 patient	severe COVID-19 patient	13.7815	2398	1010	Classical monocytes	Monocytes	severe COVID-19 patient
toy	3208	706	S1	CCGATCTCAGTTAGAA-1	Sample 1_nCoV 1 scRNA-seq [SW103]	GSM4509011	63	PBMC	M	COVID-19 patient	severe COVID-19 patient	2.33791	2662	704	MEP	MEP	severe COVID-19 patient
toy	13367	3463	S1	CCGATCTTCACGAACT-1	Sample 1_nCoV 1 scRNA-seq [SW103]	GSM4509011	63	PBMC	M	COVID-19 patient	severe COVID-19 patient	5.47617	2596	1303	Classical monocytes	Monocytes	severe COVID-19 patient
toy	4486	1271	S1	CCGATCTTCTATCGCC-1	Sample 1_nCoV 1 scRNA-seq [SW103]	GSM4509011	63	PBMC	M	COVID-19 patient	severe COVID-19 patient	7.60143	2889	1231	Naive B cells	B cells	severe COVID-19 patient
toy	2105	1034	S1	CCGATCTTCTTGGGCG-1	Sample 1_nCoV 1 scRNA-seq [SW103]	GSM4509011	63	PBMC	M	COVID-19 patient	severe COVID-19 patient	8.21853	2263	1034	Classical monocytes	Monocytes	severe COVID-19 patient
toy	5980	1538	S1	CCGATGGAGCCTAACT-1	Sample 1_nCoV 1 scRNA-seq [SW103]	GSM4509011	63	PBMC	M	COVID-19 patient	severe COVID-19 patient	9.54849	2856	1154	Non-switched memory B cells	B cells	severe COVID-19 patient
toy	43302	5533	S1	CCGATGGAGCTAGAGC-1	Sample 1_nCoV 1 scRNA-seq [SW103]	GSM4509011	63	PBMC	M	COVID-19 patient	severe COVID-19 patient	7.33684	2791	1246	Effector memory CD8 T cells	CD8+ T cells	severe COVID-19 patient
toy	3798	1136	S1	CCGATGGCACCCTTGT-1	Sample 1_nCoV 1 scRNA-seq [SW103]	GSM4509011	63	PBMC	M	COVID-19 patient	severe COVID-19 patient	8.76777	2785	1123	Th1 cells	CD4+ T cells	severe COVID-19 patient
toy	4884	1630	S1	CCGATGGGTGTTCGTA-1	Sample 1_nCoV 1 scRNA-seq [SW103]	GSM4509011	63	PBMC	M	COVID-19 patient	severe COVID-19 patient	13.3292	2996	1537	Classical monocytes	Monocytes	severe COVID-19 patient
toy	491	215	S1	CCGATGGGTGTTGAGG-1	Sample 1_nCoV 1 scRNA-seq [SW103]	GSM4509011	63	PBMC	M	COVID-19 patient	severe COVID-19 patient	2.24033	1879	342	HSC_-G-CSF	HSC_-G-CSF	severe COVID-19 patient
toy	4733	1456	S1	CCGATGGGTTCAAGTC-1	Sample 1_nCoV 1 scRNA-seq [SW103]	GSM4509011	63	PBMC	M	COVID-19 patient	severe COVID-19 patient	7.16248	2944	1374	Th1/Th17 cells	CD4+ T cells	severe COVID-19 patient
toy	5261	1601	S1	CCGATGGTCAATCCAG-1	Sample 1_nCoV 1 scRNA-seq [SW103]	GSM4509011	63	PBMC	M	COVID-19 patient	severe COVID-19 patient	7.64113	3010	1430	Naive B cells	B cells	severe COVID-19 patient
toy	5709	333	S1	CCGATGGTCATCTACT-1	Sample 1_nCoV 1 scRNA-seq [SW103]	GSM4509011	63	PBMC	M	COVID-19 patient	severe COVID-19 patient	0.332808	3180	242	Erythroblast	Erythroblast	severe COVID-19 patient
toy	2424	1192	S1	CCGATGGTCGCTATTT-1	Sample 1_nCoV 1 scRNA-seq [SW103]	GSM4509011	63	PBMC	M	COVID-19 patient	severe COVID-19 patient	8.78713	2425	1192	Classical monocytes	Monocytes	severe COVID-19 patient
toy	4811	1556	S1	CCGCAAGAGAAGGATG-1	Sample 1_nCoV 1 scRNA-seq [SW103]	GSM4509011	63	PBMC	M	COVID-19 patient	severe COVID-19 patient	7.58678	2985	1453	Effector memory CD8 T cells	CD8+ T cells	severe COVID-19 patient
toy	7855	2414	S1	CCGCAAGAGGTTGCCC-1	Sample 1_nCoV 1 scRNA-seq [SW103]	GSM4509011	63	PBMC	M	COVID-19 patient	severe COVID-19 patient	11.3431	2422	1050	Classical monocytes	Monocytes	severe COVID-19 patient
toy	2223	708	S1	CCGCAAGGTATAGGGC-1	Sample 1_nCoV 1 scRNA-seq [SW103]	GSM4509011	63	PBMC	M	COVID-19 patient	severe COVID-19 patient	4.36347	2358	708	T regulatory cells	NA	severe COVID-19 patient
toy	6791	1950	S1	CCGCAAGTCATTCGGA-1	Sample 1_nCoV 1 scRNA-seq [SW103]	GSM4509011	63	PBMC	M	COVID-19 patient	severe COVID-19 patient	6.77367	2794	1241	Vd2 gd T cells	T cells	severe COVID-19 patient
toy	1164	422	S1	CCGGACAAGAACGCGT-1	Sample 1_nCoV 1 scRNA-seq [SW103]	GSM4509011	63	PBMC	M	COVID-19 patient	severe COVID-19 patient	4.72509	2229	462	HSC_-G-CSF	HSC_-G-CSF	severe COVID-19 patient
toy	4991	1605	S1	CCGGACAAGCTAATCC-1	Sample 1_nCoV 1 scRNA-seq [SW103]	GSM4509011	63	PBMC	M	COVID-19 patient	severe COVID-19 patient	8.45522	2995	1481	Terminal effector CD8 T cells	T cells	severe COVID-19 patient
toy	1057	453	S1	CCGGACAAGGCACTCC-1	Sample 1_nCoV 1 scRNA-seq [SW103]	GSM4509011	63	PBMC	M	COVID-19 patient	severe COVID-19 patient	1.41911	2145	519	Platelets	Platelets	severe COVID-19 patient
toy	7906	1955	S1	CCGGACACAAGTTCCA-1	Sample 1_nCoV 1 scRNA-seq [SW103]	GSM4509011	63	PBMC	M	COVID-19 patient	severe COVID-19 patient	5.37566	2439	808	Non-switched memory B cells	B cells	severe COVID-19 patient
toy	8466	2351	S1	CCGGACATCAAGCCGC-1	Sample 1_nCoV 1 scRNA-seq [SW103]	GSM4509011	63	PBMC	M	COVID-19 patient	severe COVID-19 patient	8.22112	2408	939	Classical monocytes	Monocytes	severe COVID-19 patient
toy	8936	2462	S1	CCGGACATCAGCTAGT-1	Sample 1_nCoV 1 scRNA-seq [SW103]	GSM4509011	63	PBMC	M	COVID-19 patient	severe COVID-19 patient	16.081	2405	938	Classical monocytes	Monocytes	severe COVID-19 patient
toy	9627	2103	S1	CCGGACATCCTCACTG-1	Sample 1_nCoV 1 scRNA-seq [SW103]	GSM4509011	63	PBMC	M	COVID-19 patient	severe COVID-19 patient	3.59406	2370	677	Th1 cells	CD4+ T cells	severe COVID-19 patient
toy	10356	2843	S1	CCGGACATCGAACCTA-1	Sample 1_nCoV 1 scRNA-seq [SW103]	GSM4509011	63	PBMC	M	COVID-19 patient	severe COVID-19 patient	5.79374	2390	982	Classical monocytes	Monocytes	severe COVID-19 patient
toy	1395	591	S1	CCGGACATCTGCGGGT-1	Sample 1_nCoV 1 scRNA-seq [SW103]	GSM4509011	63	PBMC	M	COVID-19 patient	severe COVID-19 patient	1.43369	2039	632	Platelets	Platelets	severe COVID-19 patient
toy	2187	719	S1	CCGGGTAAGACGGTCA-1	Sample 1_nCoV 1 scRNA-seq [SW103]	GSM4509011	63	PBMC	M	COVID-19 patient	severe COVID-19 patient	5.48697	2315	718	Platelets	Platelets	severe COVID-19 patient
toy	7686	2328	S1	CCGGGTAAGTAAGACT-1	Sample 1_nCoV 1 scRNA-seq [SW103]	GSM4509011	63	PBMC	M	COVID-19 patient	severe COVID-19 patient	9.95316	2428	1031	Classical monocytes	Monocytes	severe COVID-19 patient
toy	6317	2130	S1	CCGGGTAGTCTTCGAA-1	Sample 1_nCoV 1 scRNA-seq [SW103]	GSM4509011	63	PBMC	M	COVID-19 patient	severe COVID-19 patient	7.91515	2939	1554	Classical monocytes	Monocytes	severe COVID-19 patient
toy	17959	3379	S1	CCGGGTATCACGTAGT-1	Sample 1_nCoV 1 scRNA-seq [SW103]	GSM4509011	63	PBMC	M	COVID-19 patient	severe COVID-19 patient	9.47157	2566	974	Exhausted B cells	B cells	severe COVID-19 patient
toy	1052	383	S1	CCGGGTATCCTACGGG-1	Sample 1_nCoV 1 scRNA-seq [SW103]	GSM4509011	63	PBMC	M	COVID-19 patient	severe COVID-19 patient	3.42205	2175	423	HSC_-G-CSF	HSC_-G-CSF	severe COVID-19 patient
toy	3130	969	S1	CCGGTAGAGATCCCAT-1	Sample 1_nCoV 1 scRNA-seq [SW103]	GSM4509011	63	PBMC	M	COVID-19 patient	severe COVID-19 patient	5.84665	2667	968	Naive CD8 T cells	CD8+ T cells	severe COVID-19 patient
toy	687	430	S1	CCGGTAGGTATACAGA-1	Sample 1_nCoV 1 scRNA-seq [SW103]	GSM4509011	63	PBMC	M	COVID-19 patient	severe COVID-19 patient	7.7147	1905	498	NA	Monocytes	severe COVID-19 patient
toy	17579	4014	S1	CCGGTAGGTCCTGAAT-1	Sample 1_nCoV 1 scRNA-seq [SW103]	GSM4509011	63	PBMC	M	COVID-19 patient	severe COVID-19 patient	8.44189	2574	1240	Intermediate monocytes	Monocytes	severe COVID-19 patient
toy	11604	3085	S1	CCGGTGACACTGTCGG-1	Sample 1_nCoV 1 scRNA-seq [SW103]	GSM4509011	63	PBMC	M	COVID-19 patient	severe COVID-19 patient	5.51534	2555	1210	Classical monocytes	Monocytes	severe COVID-19 patient
toy	13728	2597	S1	CCGGTGACAGAGAATT-1	Sample 1_nCoV 1 scRNA-seq [SW103]	GSM4509011	63	PBMC	M	COVID-19 patient	severe COVID-19 patient	7.07314	2413	665	Non-switched memory B cells	B cells	severe COVID-19 patient
toy	10613	2196	S1	CCGGTGAGTATCTTCT-1	Sample 1_nCoV 1 scRNA-seq [SW103]	GSM4509011	63	PBMC	M	COVID-19 patient	severe COVID-19 patient	15.1607	2420	660	Naive B cells	B cells	severe COVID-19 patient
toy	14408	3414	S1	CCGGTGAGTCGAGTGA-1	Sample 1_nCoV 1 scRNA-seq [SW103]	GSM4509011	63	PBMC	M	COVID-19 patient	severe COVID-19 patient	8.08579	2576	1159	Intermediate monocytes	Monocytes	severe COVID-19 patient
toy	6933	1492	S1	CCGTAGGAGGGTTGCA-1	Sample 1_nCoV 1 scRNA-seq [SW103]	GSM4509011	63	PBMC	M	COVID-19 patient	severe COVID-19 patient	9.02928	2665	849	Naive B cells	B cells	severe COVID-19 patient
toy	4743	1060	S1	CCGTAGGCAATCGCCG-1	Sample 1_nCoV 1 scRNA-seq [SW103]	GSM4509011	63	PBMC	M	COVID-19 patient	severe COVID-19 patient	18.7645	2825	980	Naive B cells	B cells	severe COVID-19 patient
toy	4257	1677	S1	CCGTAGGCATAGGAGC-1	Sample 1_nCoV 1 scRNA-seq [SW103]	GSM4509011	63	PBMC	M	COVID-19 patient	severe COVID-19 patient	5.44985	2936	1651	Classical monocytes	Monocytes	severe COVID-19 patient
toy	48989	3916	S1	CCGTAGGGTCGAACAG-1	Sample 1_nCoV 1 scRNA-seq [SW103]	GSM4509011	63	PBMC	M	COVID-19 patient	severe COVID-19 patient	4.05193	3269	444	Plasmablasts	B cells	severe COVID-19 patient
toy	4730	1620	S1	CCGTAGGTCAGCTTCC-1	Sample 1_nCoV 1 scRNA-seq [SW103]	GSM4509011	63	PBMC	M	COVID-19 patient	severe COVID-19 patient	8.13953	2981	1536	Classical monocytes	Monocytes	severe COVID-19 patient
toy	480	291	S1	CCGTAGGTCCCGTGAG-1	Sample 1_nCoV 1 scRNA-seq [SW103]	GSM4509011	63	PBMC	M	COVID-19 patient	severe COVID-19 patient	10.4167	1865	399	HSC_-G-CSF	HSC_-G-CSF	severe COVID-19 patient
toy	5431	2054	S1	CCGTGAGCAGTGGCTC-1	Sample 1_nCoV 1 scRNA-seq [SW103]	GSM4509011	63	PBMC	M	COVID-19 patient	severe COVID-19 patient	13.1283	3136	1831	Natural killer cells	NK cells	severe COVID-19 patient
toy	9014	2170	S1	CCGTGAGTCCAACTAG-1	Sample 1_nCoV 1 scRNA-seq [SW103]	GSM4509011	63	PBMC	M	COVID-19 patient	severe COVID-19 patient	13.3015	2388	726	Non-switched memory B cells	B cells	severe COVID-19 patient
toy	8007	1876	S1	CCGTGAGTCGTAGAGG-1	Sample 1_nCoV 1 scRNA-seq [SW103]	GSM4509011	63	PBMC	M	COVID-19 patient	severe COVID-19 patient	4.03397	2380	688	Th1/Th17 cells	CD4+ T cells	severe COVID-19 patient
toy	8834	2314	S1	CCGTTCAAGAGGTATT-1	Sample 1_nCoV 1 scRNA-seq [SW103]	GSM4509011	63	PBMC	M	COVID-19 patient	severe COVID-19 patient	7.13154	2425	882	Follicular helper T cells	CD4+ T cells	severe COVID-19 patient
toy	3976	1525	S1	CCGTTCAAGCGACTGA-1	Sample 1_nCoV 1 scRNA-seq [SW103]	GSM4509011	63	PBMC	M	COVID-19 patient	severe COVID-19 patient	9.6831	2851	1515	Classical monocytes	Monocytes	severe COVID-19 patient
toy	4836	1399	S1	CCGTTCAAGCGTACAG-1	Sample 1_nCoV 1 scRNA-seq [SW103]	GSM4509011	63	PBMC	M	COVID-19 patient	severe COVID-19 patient	7.3201	2956	1310	Naive B cells	B cells	severe COVID-19 patient
toy	534	221	S1	CCGTTCAAGCTAGATA-1	Sample 1_nCoV 1 scRNA-seq [SW103]	GSM4509011	63	PBMC	M	COVID-19 patient	severe COVID-19 patient	11.7978	1884	362	HSC_-G-CSF	HSC_-G-CSF	severe COVID-19 patient
toy	4021	1661	S1	CCGTTCAAGGTACAAT-1	Sample 1_nCoV 1 scRNA-seq [SW103]	GSM4509011	63	PBMC	M	COVID-19 patient	severe COVID-19 patient	8.23178	2887	1650	Classical monocytes	Monocytes	severe COVID-19 patient
toy	2874	1224	S1	CCGTTCAAGTGCAGCA-1	Sample 1_nCoV 1 scRNA-seq [SW103]	GSM4509011	63	PBMC	M	COVID-19 patient	severe COVID-19 patient	4.80167	2655	1224	T regulatory cells	CD4+ T cells	severe COVID-19 patient
toy	26750	1171	S1	CCGTTCACAACCACAT-1	Sample 1_nCoV 1 scRNA-seq [SW103]	GSM4509011	63	PBMC	M	COVID-19 patient	severe COVID-19 patient	1.15514	3956	233	Erythroblast	Erythroblast	severe COVID-19 patient
toy	5087	1632	S1	CCGTTCACACTGAGGA-1	Sample 1_nCoV 1 scRNA-seq [SW103]	GSM4509011	63	PBMC	M	COVID-19 patient	severe COVID-19 patient	11.4999	3004	1498	Classical monocytes	Monocytes	severe COVID-19 patient
toy	13034	2611	S1	CCGTTCACAGACACAG-1	Sample 1_nCoV 1 scRNA-seq [SW103]	GSM4509011	63	PBMC	M	COVID-19 patient	severe COVID-19 patient	6.52141	2531	807	Non-switched memory B cells	B cells	severe COVID-19 patient
toy	870	318	S1	CCGTTCATCTGAGAGG-1	Sample 1_nCoV 1 scRNA-seq [SW103]	GSM4509011	63	PBMC	M	COVID-19 patient	severe COVID-19 patient	10.4598	2075	398	Platelets	Platelets	severe COVID-19 patient
toy	7717	1841	S1	CCTAACCAGAATTTGG-1	Sample 1_nCoV 1 scRNA-seq [SW103]	GSM4509011	63	PBMC	M	COVID-19 patient	severe COVID-19 patient	4.05598	2413	718	Naive CD4 T cells	CD4+ T cells	severe COVID-19 patient
toy	570	285	S1	CCTAACCCACTGAGGA-1	Sample 1_nCoV 1 scRNA-seq [SW103]	GSM4509011	63	PBMC	M	COVID-19 patient	severe COVID-19 patient	14.5614	1879	412	HSC_-G-CSF	HSC_-G-CSF	severe COVID-19 patient
toy	434	292	S1	CCTAACCTCTTGGAAC-1	Sample 1_nCoV 1 scRNA-seq [SW103]	GSM4509011	63	PBMC	M	COVID-19 patient	severe COVID-19 patient	4.60829	1828	422	NA	NA	severe COVID-19 patient
toy	1304	500	S1	CCTAAGAAGACCTTTG-1	Sample 1_nCoV 1 scRNA-seq [SW103]	GSM4509011	63	PBMC	M	COVID-19 patient	severe COVID-19 patient	9.27914	2114	534	Platelets	Platelets	severe COVID-19 patient
toy	716	295	S1	CCTAAGAAGCGCATCC-1	Sample 1_nCoV 1 scRNA-seq [SW103]	GSM4509011	63	PBMC	M	COVID-19 patient	severe COVID-19 patient	6.42458	1967	383	HSC_-G-CSF	HSC_-G-CSF	severe COVID-19 patient
toy	5486	1975	S1	CCTAAGAAGGAATTAC-1	Sample 1_nCoV 1 scRNA-seq [SW103]	GSM4509011	63	PBMC	M	COVID-19 patient	severe COVID-19 patient	8.69486	3076	1711	Classical monocytes	Monocytes	severe COVID-19 patient
toy	10336	2861	S1	CCTAAGAAGGTGCAGT-1	Sample 1_nCoV 1 scRNA-seq [SW103]	GSM4509011	63	PBMC	M	COVID-19 patient	severe COVID-19 patient	7.07237	2504	1133	Classical monocytes	Monocytes	severe COVID-19 patient
toy	12196	2999	S1	CCTAAGACAATTTCCT-1	Sample 1_nCoV 1 scRNA-seq [SW103]	GSM4509011	63	PBMC	M	COVID-19 patient	severe COVID-19 patient	4.0997	2598	1154	Classical monocytes	Monocytes	severe COVID-19 patient
toy	9024	2448	S1	CCTAAGACAGATTAAG-1	Sample 1_nCoV 1 scRNA-seq [SW103]	GSM4509011	63	PBMC	M	COVID-19 patient	severe COVID-19 patient	5.68484	2401	932	Th1/Th17 cells	CD4+ T cells	severe COVID-19 patient
toy	11158	2913	S1	CCTAAGAGTTACCGTA-1	Sample 1_nCoV 1 scRNA-seq [SW103]	GSM4509011	63	PBMC	M	COVID-19 patient	severe COVID-19 patient	6.90984	2527	1125	Classical monocytes	Monocytes	severe COVID-19 patient
toy	14897	3345	S1	CCTACGTAGACCGTTT-1	Sample 1_nCoV 1 scRNA-seq [SW103]	GSM4509011	63	PBMC	M	COVID-19 patient	severe COVID-19 patient	7.53843	2573	1117	Classical monocytes	Monocytes	severe COVID-19 patient
toy	22450	4669	S1	CCTACGTAGCAGTCTT-1	Sample 1_nCoV 1 scRNA-seq [SW103]	GSM4509011	63	PBMC	M	COVID-19 patient	severe COVID-19 patient	8.81069	2431	1156	Myeloid dendritic cells	Dendritic cells	severe COVID-19 patient
toy	21137	4169	S1	CCTACGTCAATCGCAT-1	Sample 1_nCoV 1 scRNA-seq [SW103]	GSM4509011	63	PBMC	M	COVID-19 patient	severe COVID-19 patient	6.50045	2506	1035	Intermediate monocytes	Monocytes	severe COVID-19 patient
toy	1731	884	S1	CCTACGTCATAATGCC-1	Sample 1_nCoV 1 scRNA-seq [SW103]	GSM4509011	63	PBMC	M	COVID-19 patient	severe COVID-19 patient	7.16349	2148	884	Classical monocytes	Monocytes	severe COVID-19 patient
toy	4245	1629	S1	CCTACGTGTTCCTACC-1	Sample 1_nCoV 1 scRNA-seq [SW103]	GSM4509011	63	PBMC	M	COVID-19 patient	severe COVID-19 patient	12.0141	2932	1599	Classical monocytes	Monocytes	severe COVID-19 patient
toy	4086	1228	S1	CCTATCGCAAATTGCC-1	Sample 1_nCoV 1 scRNA-seq [SW103]	GSM4509011	63	PBMC	M	COVID-19 patient	severe COVID-19 patient	11.7719	2809	1206	Th2 cells	CD4+ T cells	severe COVID-19 patient
toy	1997	897	S1	CCTATCGCAACCAATC-1	Sample 1_nCoV 1 scRNA-seq [SW103]	GSM4509011	63	PBMC	M	COVID-19 patient	severe COVID-19 patient	15.6735	2241	897	Classical monocytes	Monocytes	severe COVID-19 patient
toy	7781	2482	S1	CCTATCGCAGAACCGA-1	Sample 1_nCoV 1 scRNA-seq [SW103]	GSM4509011	63	PBMC	M	COVID-19 patient	severe COVID-19 patient	18.6737	2416	1053	Classical monocytes	Monocytes	severe COVID-19 patient
toy	16234	3536	S1	CCTATCGCAGAATCGG-1	Sample 1_nCoV 1 scRNA-seq [SW103]	GSM4509011	63	PBMC	M	COVID-19 patient	severe COVID-19 patient	5.96895	2510	1090	Classical monocytes	Monocytes	severe COVID-19 patient
toy	1066	558	S1	CCTATCGCAGGATTCT-1	Sample 1_nCoV 1 scRNA-seq [SW103]	GSM4509011	63	PBMC	M	COVID-19 patient	severe COVID-19 patient	3.84615	2187	585	Classical monocytes	NA	severe COVID-19 patient
toy	8689	2410	S1	CCTATCGGTACGACAG-1	Sample 1_nCoV 1 scRNA-seq [SW103]	GSM4509011	63	PBMC	M	COVID-19 patient	severe COVID-19 patient	8.67764	2408	911	Vd2 gd T cells	T cells	severe COVID-19 patient
toy	2127	889	S1	CCTATCGGTCTAACTG-1	Sample 1_nCoV 1 scRNA-seq [SW103]	GSM4509011	63	PBMC	M	COVID-19 patient	severe COVID-19 patient	0.376117	2292	889	Classical monocytes	Monocytes	severe COVID-19 patient
toy	1433	431	S1	CCTATCGGTGCCGAAA-1	Sample 1_nCoV 1 scRNA-seq [SW103]	GSM4509011	63	PBMC	M	COVID-19 patient	severe COVID-19 patient	10.4676	2145	466	Platelets	Platelets	severe COVID-19 patient
toy	5126	1666	S1	CCTATCGTCCATCTAT-1	Sample 1_nCoV 1 scRNA-seq [SW103]	GSM4509011	63	PBMC	M	COVID-19 patient	severe COVID-19 patient	6.61334	3031	1515	Naive B cells	B cells	severe COVID-19 patient
toy	6016	1648	S1	CCTATCGTCGGCTTGG-1	Sample 1_nCoV 1 scRNA-seq [SW103]	GSM4509011	63	PBMC	M	COVID-19 patient	severe COVID-19 patient	6.23338	2881	1261	Follicular helper T cells	CD4+ T cells	severe COVID-19 patient
toy	11373	3019	S1	CCTATCGTCTATACTC-1	Sample 1_nCoV 1 scRNA-seq [SW103]	GSM4509011	63	PBMC	M	COVID-19 patient	severe COVID-19 patient	7.39471	2567	1212	Classical monocytes	Monocytes	severe COVID-19 patient
toy	1534	578	S1	CCTCAACAGTTTGGCT-1	Sample 1_nCoV 1 scRNA-seq [SW103]	GSM4509011	63	PBMC	M	COVID-19 patient	severe COVID-19 patient	18.8396	2155	580	Naive B cells	B cells	severe COVID-19 patient
toy	4492	1703	S1	CCTCAACGTATCGTTG-1	Sample 1_nCoV 1 scRNA-seq [SW103]	GSM4509011	63	PBMC	M	COVID-19 patient	severe COVID-19 patient	6.61175	3009	1645	Natural killer cells	NK cells	severe COVID-19 patient
toy	10696	3031	S1	CCTCAACGTTAGAAGT-1	Sample 1_nCoV 1 scRNA-seq [SW103]	GSM4509011	63	PBMC	M	COVID-19 patient	severe COVID-19 patient	5.2356	2546	1183	Intermediate monocytes	Monocytes	severe COVID-19 patient
toy	7484	222	S1	CCTCAACGTTGCAACT-1	Sample 1_nCoV 1 scRNA-seq [SW103]	GSM4509011	63	PBMC	M	COVID-19 patient	severe COVID-19 patient	1.08231	3304	68	Erythroblast	Erythroblast	severe COVID-19 patient
toy	5503	1955	S1	CCTCAACGTTGGCCGT-1	Sample 1_nCoV 1 scRNA-seq [SW103]	GSM4509011	63	PBMC	M	COVID-19 patient	severe COVID-19 patient	11.3211	3073	1706	Classical monocytes	Monocytes	severe COVID-19 patient
toy	1613	767	S1	CCTCAACGTTTGATCG-1	Sample 1_nCoV 1 scRNA-seq [SW103]	GSM4509011	63	PBMC	M	COVID-19 patient	severe COVID-19 patient	19.2188	2127	767	Natural killer cells	NK cells	severe COVID-19 patient
toy	9400	2613	S1	CCTCAACTCGGTCAGC-1	Sample 1_nCoV 1 scRNA-seq [SW103]	GSM4509011	63	PBMC	M	COVID-19 patient	severe COVID-19 patient	9.17021	2416	999	Classical monocytes	Monocytes	severe COVID-19 patient
toy	5062	1681	S1	CCTCACAAGCGTACAG-1	Sample 1_nCoV 1 scRNA-seq [SW103]	GSM4509011	63	PBMC	M	COVID-19 patient	severe COVID-19 patient	9.10707	3014	1533	Non-Vd2 gd T cells	T cells	severe COVID-19 patient
toy	6039	1937	S1	CCTCACAAGGCACAAC-1	Sample 1_nCoV 1 scRNA-seq [SW103]	GSM4509011	63	PBMC	M	COVID-19 patient	severe COVID-19 patient	10.0182	3000	1512	MAIT cells	T cells	severe COVID-19 patient
toy	3779	1466	S1	CCTCACACACTAAACC-1	Sample 1_nCoV 1 scRNA-seq [SW103]	GSM4509011	63	PBMC	M	COVID-19 patient	severe COVID-19 patient	5.53056	2853	1460	Classical monocytes	Monocytes	severe COVID-19 patient
toy	13091	3179	S1	CCTCACAGTAGAGATT-1	Sample 1_nCoV 1 scRNA-seq [SW103]	GSM4509011	63	PBMC	M	COVID-19 patient	severe COVID-19 patient	6.24857	2561	1143	Classical monocytes	Monocytes	severe COVID-19 patient
toy	1028	681	S1	CCTCACATCGGATAAA-1	Sample 1_nCoV 1 scRNA-seq [SW103]	GSM4509011	63	PBMC	M	COVID-19 patient	severe COVID-19 patient	1.36187	2029	763	Platelets	Platelets	severe COVID-19 patient
toy	7427	2376	S1	CCTCAGTGTACCGTGC-1	Sample 1_nCoV 1 scRNA-seq [SW103]	GSM4509011	63	PBMC	M	COVID-19 patient	severe COVID-19 patient	8.59028	2484	1133	Classical monocytes	Monocytes	severe COVID-19 patient
toy	7052	1979	S1	CCTCAGTTCCTATGGA-1	Sample 1_nCoV 1 scRNA-seq [SW103]	GSM4509011	63	PBMC	M	COVID-19 patient	severe COVID-19 patient	11.0465	2678	1121	T regulatory cells	CD4+ T cells	severe COVID-19 patient
toy	2696	1146	S1	CCTCATGAGGTGAGCT-1	Sample 1_nCoV 1 scRNA-seq [SW103]	GSM4509011	63	PBMC	M	COVID-19 patient	severe COVID-19 patient	17.0252	2589	1146	Classical monocytes	Monocytes	severe COVID-19 patient
toy	3066	1038	S1	CCTCATGCAAGAGTTA-1	Sample 1_nCoV 1 scRNA-seq [SW103]	GSM4509011	63	PBMC	M	COVID-19 patient	severe COVID-19 patient	8.64318	2673	1037	Non-switched memory B cells	B cells	severe COVID-19 patient
toy	15816	3397	S1	CCTCATGGTAGACGGT-1	Sample 1_nCoV 1 scRNA-seq [SW103]	GSM4509011	63	PBMC	M	COVID-19 patient	severe COVID-19 patient	6.73369	2570	1109	Classical monocytes	Monocytes	severe COVID-19 patient
toy	4598	1650	S1	CCTCATGGTTGCTTGA-1	Sample 1_nCoV 1 scRNA-seq [SW103]	GSM4509011	63	PBMC	M	COVID-19 patient	severe COVID-19 patient	9.67812	2996	1590	Classical monocytes	Monocytes	severe COVID-19 patient
toy	4382	1604	S1	CCTCATGTCTGGACCG-1	Sample 1_nCoV 1 scRNA-seq [SW103]	GSM4509011	63	PBMC	M	COVID-19 patient	severe COVID-19 patient	9.42492	2981	1563	Natural killer cells	NK cells	severe COVID-19 patient
toy	8644	2655	S1	CCTCATGTCTTAGTTC-1	Sample 1_nCoV 1 scRNA-seq [SW103]	GSM4509011	63	PBMC	M	COVID-19 patient	severe COVID-19 patient	5.69181	2411	1063	Classical monocytes	Monocytes	severe COVID-19 patient
toy	13250	3356	S1	CCTCATGTCTTCGTGC-1	Sample 1_nCoV 1 scRNA-seq [SW103]	GSM4509011	63	PBMC	M	COVID-19 patient	severe COVID-19 patient	5.75094	2607	1201	Classical monocytes	Monocytes	severe COVID-19 patient
toy	3875	1356	S1	CCTCCAAAGCTAGTTC-1	Sample 1_nCoV 1 scRNA-seq [SW103]	GSM4509011	63	PBMC	M	COVID-19 patient	severe COVID-19 patient	6.29677	2854	1346	T regulatory cells	CD4+ T cells	severe COVID-19 patient
toy	2459	1070	S1	CCTCCAACAAACCACT-1	Sample 1_nCoV 1 scRNA-seq [SW103]	GSM4509011	63	PBMC	M	COVID-19 patient	severe COVID-19 patient	18.2595	2456	1068	NA	Monocytes	severe COVID-19 patient
toy	2167	697	S1	CCTCCAACAAGAGATT-1	Sample 1_nCoV 1 scRNA-seq [SW103]	GSM4509011	63	PBMC	M	COVID-19 patient	severe COVID-19 patient	5.86064	2303	697	Platelets	Platelets	severe COVID-19 patient
toy	5125	1755	S1	CCTCCTCAGAAGCTCG-1	Sample 1_nCoV 1 scRNA-seq [SW103]	GSM4509011	63	PBMC	M	COVID-19 patient	severe COVID-19 patient	8.74146	3018	1580	Classical monocytes	Monocytes	severe COVID-19 patient
toy	15480	3867	S1	CCTCCTCAGCCGCACT-1	Sample 1_nCoV 1 scRNA-seq [SW103]	GSM4509011	63	PBMC	M	COVID-19 patient	severe COVID-19 patient	5.97545	2673	1421	Classical monocytes	Monocytes	severe COVID-19 patient
toy	3304	1361	S1	CCTCCTCAGCGTGTTT-1	Sample 1_nCoV 1 scRNA-seq [SW103]	GSM4509011	63	PBMC	M	COVID-19 patient	severe COVID-19 patient	8.65617	2791	1361	Classical monocytes	Monocytes	severe COVID-19 patient
toy	12185	3298	S1	CCTCCTCAGTGCTCAT-1	Sample 1_nCoV 1 scRNA-seq [SW103]	GSM4509011	63	PBMC	M	COVID-19 patient	severe COVID-19 patient	7.92778	2613	1273	Classical monocytes	Monocytes	severe COVID-19 patient
toy	5457	2018	S1	CCTCCTCCATCGATAC-1	Sample 1_nCoV 1 scRNA-seq [SW103]	GSM4509011	63	PBMC	M	COVID-19 patient	severe COVID-19 patient	7.71486	3166	1803	Natural killer cells	NK cells	severe COVID-19 patient
toy	4229	1549	S1	CCTCCTCGTTGCTAGT-1	Sample 1_nCoV 1 scRNA-seq [SW103]	GSM4509011	63	PBMC	M	COVID-19 patient	severe COVID-19 patient	9.88413	2904	1526	Natural killer cells	NK cells	severe COVID-19 patient
toy	7988	1913	S1	CCTCTAGCATTCATCT-1	Sample 1_nCoV 1 scRNA-seq [SW103]	GSM4509011	63	PBMC	M	COVID-19 patient	severe COVID-19 patient	5.67101	2422	756	Central memory CD8 T cells	CD8+ T cells	severe COVID-19 patient
toy	573	214	S1	CCTCTAGTCAGTCCGG-1	Sample 1_nCoV 1 scRNA-seq [SW103]	GSM4509011	63	PBMC	M	COVID-19 patient	severe COVID-19 patient	15.7068	1946	350	HSC_-G-CSF	HSC_-G-CSF	severe COVID-19 patient
toy	4029	1546	S1	CCTCTAGTCCCTCATG-1	Sample 1_nCoV 1 scRNA-seq [SW103]	GSM4509011	63	PBMC	M	COVID-19 patient	severe COVID-19 patient	13.0553	2889	1529	Natural killer cells	NK cells	severe COVID-19 patient
toy	4881	1597	S1	CCTCTAGTCGAACGGA-1	Sample 1_nCoV 1 scRNA-seq [SW103]	GSM4509011	63	PBMC	M	COVID-19 patient	severe COVID-19 patient	12.354	2997	1477	Non-Vd2 gd T cells	T cells	severe COVID-19 patient
toy	515	277	S1	CCTCTCCGTCTTTCAT-1	Sample 1_nCoV 1 scRNA-seq [SW103]	GSM4509011	63	PBMC	M	COVID-19 patient	severe COVID-19 patient	9.70874	1835	405	HSC_-G-CSF	HSC_-G-CSF	severe COVID-19 patient
toy	3332	237	S1	CCTCTCCGTGTCTCCT-1	Sample 1_nCoV 1 scRNA-seq [SW103]	GSM4509011	63	PBMC	M	COVID-19 patient	severe COVID-19 patient	1.71068	2732	225	Erythroblast	Erythroblast	severe COVID-19 patient
toy	471	203	S1	CCTCTCCTCGCACGGT-1	Sample 1_nCoV 1 scRNA-seq [SW103]	GSM4509011	63	PBMC	M	COVID-19 patient	severe COVID-19 patient	11.8896	1895	345	HSC_-G-CSF	HSC_-G-CSF	severe COVID-19 patient
toy	437	230	S1	CCTCTCCTCGGACTGC-1	Sample 1_nCoV 1 scRNA-seq [SW103]	GSM4509011	63	PBMC	M	COVID-19 patient	severe COVID-19 patient	16.0183	1848	408	NA	NA	severe COVID-19 patient
toy	6128	1876	S1	CCTGCATAGGTGCAGT-1	Sample 1_nCoV 1 scRNA-seq [SW103]	GSM4509011	63	PBMC	M	COVID-19 patient	severe COVID-19 patient	6.18473	2963	1442	Terminal effector CD8 T cells	T cells	severe COVID-19 patient
toy	3454	1254	S1	CCTGCATCATTCGATG-1	Sample 1_nCoV 1 scRNA-seq [SW103]	GSM4509011	63	PBMC	M	COVID-19 patient	severe COVID-19 patient	2.80834	2800	1252	Non-switched memory B cells	B cells	severe COVID-19 patient
toy	11110	2983	S1	CCTGCATGTACCGTGC-1	Sample 1_nCoV 1 scRNA-seq [SW103]	GSM4509011	63	PBMC	M	COVID-19 patient	severe COVID-19 patient	6.0126	2508	1145	Classical monocytes	Monocytes	severe COVID-19 patient
toy	8261	2176	S1	CCTGCATTCAGCTAGT-1	Sample 1_nCoV 1 scRNA-seq [SW103]	GSM4509011	63	PBMC	M	COVID-19 patient	severe COVID-19 patient	9.3088	2420	843	MAIT cells	T cells	severe COVID-19 patient
toy	12318	3127	S1	CCTGCATTCATGTCAG-1	Sample 1_nCoV 1 scRNA-seq [SW103]	GSM4509011	63	PBMC	M	COVID-19 patient	severe COVID-19 patient	5.78016	2617	1215	Vd2 gd T cells	T cells	severe COVID-19 patient
toy	518	247	S1	CCTGCATTCGCAACAT-1	Sample 1_nCoV 1 scRNA-seq [SW103]	GSM4509011	63	PBMC	M	COVID-19 patient	severe COVID-19 patient	4.6332	1853	382	HSC_-G-CSF	HSC_-G-CSF	severe COVID-19 patient
toy	7132	2255	S1	CCTGTTGAGGCTAAAT-1	Sample 1_nCoV 1 scRNA-seq [SW103]	GSM4509011	63	PBMC	M	COVID-19 patient	severe COVID-19 patient	6.94055	2624	1243	Classical monocytes	Monocytes	severe COVID-19 patient
toy	1654	693	S1	CCTGTTGTCCGCAAAT-1	Sample 1_nCoV 1 scRNA-seq [SW103]	GSM4509011	63	PBMC	M	COVID-19 patient	severe COVID-19 patient	4.11125	2175	693	Classical monocytes	Monocytes	severe COVID-19 patient
toy	6895	2189	S1	CCTTCAGAGGAGCTGT-1	Sample 1_nCoV 1 scRNA-seq [SW103]	GSM4509011	63	PBMC	M	COVID-19 patient	severe COVID-19 patient	6.91806	2731	1330	Classical monocytes	Monocytes	severe COVID-19 patient
toy	12686	3000	S1	CCTTCAGAGGGATCTG-1	Sample 1_nCoV 1 scRNA-seq [SW103]	GSM4509011	63	PBMC	M	COVID-19 patient	severe COVID-19 patient	5.74649	2569	1106	Classical monocytes	Monocytes	severe COVID-19 patient
toy	1144	430	S1	CCTTCAGAGGTCGTAG-1	Sample 1_nCoV 1 scRNA-seq [SW103]	GSM4509011	63	PBMC	M	COVID-19 patient	severe COVID-19 patient	6.29371	2203	479	Platelets	Platelets	severe COVID-19 patient
toy	17646	3680	S1	CCTTCAGCAACCGGAA-1	Sample 1_nCoV 1 scRNA-seq [SW103]	GSM4509011	63	PBMC	M	COVID-19 patient	severe COVID-19 patient	6.31871	2530	1097	Classical monocytes	Monocytes	severe COVID-19 patient
toy	7784	2283	S1	CCTTCAGCAACTTGCA-1	Sample 1_nCoV 1 scRNA-seq [SW103]	GSM4509011	63	PBMC	M	COVID-19 patient	severe COVID-19 patient	8.53032	2418	998	Classical monocytes	Monocytes	severe COVID-19 patient
toy	926	360	S1	CCTTCAGGTTTCACTT-1	Sample 1_nCoV 1 scRNA-seq [SW103]	GSM4509011	63	PBMC	M	COVID-19 patient	severe COVID-19 patient	9.07127	2086	418	HSC_-G-CSF	HSC_-G-CSF	severe COVID-19 patient
toy	7088	2130	S1	CCTTCAGTCACCTCGT-1	Sample 1_nCoV 1 scRNA-seq [SW103]	GSM4509011	63	PBMC	M	COVID-19 patient	severe COVID-19 patient	9.24097	2656	1174	Non-Vd2 gd T cells	NK cells	severe COVID-19 patient
toy	1967	725	S1	CCTTGTGAGCGTGAAC-1	Sample 1_nCoV 1 scRNA-seq [SW103]	GSM4509011	63	PBMC	M	COVID-19 patient	severe COVID-19 patient	5.38892	2204	725	Platelets	Platelets	severe COVID-19 patient
toy	2355	256	S1	CCTTGTGCATGGAAGC-1	Sample 1_nCoV 1 scRNA-seq [SW103]	GSM4509011	63	PBMC	M	COVID-19 patient	severe COVID-19 patient	0.764331	2404	256	Erythroblast	Erythroblast	severe COVID-19 patient
toy	5322	1534	S1	CCTTGTGGTCCCAAAT-1	Sample 1_nCoV 1 scRNA-seq [SW103]	GSM4509011	63	PBMC	M	COVID-19 patient	severe COVID-19 patient	6.10673	3050	1336	Naive B cells	B cells	severe COVID-19 patient
toy	13903	3372	S1	CCTTGTGTCCTTATCA-1	Sample 1_nCoV 1 scRNA-seq [SW103]	GSM4509011	63	PBMC	M	COVID-19 patient	severe COVID-19 patient	7.30058	2606	1228	Classical monocytes	Monocytes	severe COVID-19 patient
toy	2194	251	S1	CCTTTGGAGTCGCGAA-1	Sample 1_nCoV 1 scRNA-seq [SW103]	GSM4509011	63	PBMC	M	COVID-19 patient	severe COVID-19 patient	3.2361	2332	250	Erythroblast	Erythroblast	severe COVID-19 patient
toy	5989	1633	S1	CCTTTGGGTATCATGC-1	Sample 1_nCoV 1 scRNA-seq [SW103]	GSM4509011	63	PBMC	M	COVID-19 patient	severe COVID-19 patient	5.40992	2920	1249	Naive B cells	B cells	severe COVID-19 patient
toy	6845	2254	S1	CCTTTGGTCATGAGTC-1	Sample 1_nCoV 1 scRNA-seq [SW103]	GSM4509011	63	PBMC	M	COVID-19 patient	severe COVID-19 patient	10.431	2773	1406	Classical monocytes	Monocytes	severe COVID-19 patient
toy	23663	3930	S1	CGAAGGAAGGGACACT-1	Sample 1_nCoV 1 scRNA-seq [SW103]	GSM4509011	63	PBMC	M	COVID-19 patient	severe COVID-19 patient	13.4641	2866	1007	Plasmablasts	B cells	severe COVID-19 patient
toy	5947	1503	S1	CGAAGGACAAATCAAG-1	Sample 1_nCoV 1 scRNA-seq [SW103]	GSM4509011	63	PBMC	M	COVID-19 patient	severe COVID-19 patient	5.9694	2889	1158	Naive B cells	B cells	severe COVID-19 patient
toy	8648	1661	S1	CGAAGGACACCGCTAG-1	Sample 1_nCoV 1 scRNA-seq [SW103]	GSM4509011	63	PBMC	M	COVID-19 patient	severe COVID-19 patient	3.73497	2410	590	Naive CD4 T cells	CD4+ T cells	severe COVID-19 patient
toy	8003	1865	S1	CGAAGGACACCTAAAC-1	Sample 1_nCoV 1 scRNA-seq [SW103]	GSM4509011	63	PBMC	M	COVID-19 patient	severe COVID-19 patient	12.8577	2417	697	Exhausted B cells	B cells	severe COVID-19 patient
toy	5242	1691	S1	CGAAGGACACTCCGAG-1	Sample 1_nCoV 1 scRNA-seq [SW103]	GSM4509011	63	PBMC	M	COVID-19 patient	severe COVID-19 patient	15.4521	2978	1506	Classical monocytes	Monocytes	severe COVID-19 patient
toy	4462	1213	S1	CGAAGGAGTAGGTCAG-1	Sample 1_nCoV 1 scRNA-seq [SW103]	GSM4509011	63	PBMC	M	COVID-19 patient	severe COVID-19 patient	8.0009	2866	1169	Th17 cells	CD4+ T cells	severe COVID-19 patient
toy	6329	1519	S1	CGAAGGATCAAGGACG-1	Sample 1_nCoV 1 scRNA-seq [SW103]	GSM4509011	63	PBMC	M	COVID-19 patient	severe COVID-19 patient	4.61368	2806	1070	Follicular helper T cells	CD4+ T cells	severe COVID-19 patient
toy	20399	3707	S1	CGAAGGATCGCGTTTC-1	Sample 1_nCoV 1 scRNA-seq [SW103]	GSM4509011	63	PBMC	M	COVID-19 patient	severe COVID-19 patient	6.99544	2501	928	Myeloid dendritic cells	Dendritic cells	severe COVID-19 patient
toy	2090	939	S1	CGAAGTTAGGGTGAAA-1	Sample 1_nCoV 1 scRNA-seq [SW103]	GSM4509011	63	PBMC	M	COVID-19 patient	severe COVID-19 patient	13.11	2263	937	Classical monocytes	Monocytes	severe COVID-19 patient
toy	369	275	S1	CGAAGTTCAGCGTACC-1	Sample 1_nCoV 1 scRNA-seq [SW103]	GSM4509011	63	PBMC	M	COVID-19 patient	severe COVID-19 patient	11.3821	1765	414	NA	NA	severe COVID-19 patient
toy	3747	1380	S1	CGAAGTTCAGTTGGTT-1	Sample 1_nCoV 1 scRNA-seq [SW103]	GSM4509011	63	PBMC	M	COVID-19 patient	severe COVID-19 patient	16.5466	2848	1373	Natural killer cells	NK cells	severe COVID-19 patient
toy	6740	1642	S1	CGAAGTTGTGGCAACA-1	Sample 1_nCoV 1 scRNA-seq [SW103]	GSM4509011	63	PBMC	M	COVID-19 patient	severe COVID-19 patient	4.98516	2706	998	Naive CD4 T cells	CD4+ T cells	severe COVID-19 patient
toy	272	219	S1	CGAAGTTGTTACACTG-1	Sample 1_nCoV 1 scRNA-seq [SW103]	GSM4509011	63	PBMC	M	COVID-19 patient	severe COVID-19 patient	7.72059	1669	403	Myeloid dendritic cells	NA	severe COVID-19 patient
toy	303	221	S1	CGAATTGAGCTAAACA-1	Sample 1_nCoV 1 scRNA-seq [SW103]	GSM4509011	63	PBMC	M	COVID-19 patient	severe COVID-19 patient	10.231	1717	395	NA	NA	severe COVID-19 patient
toy	5636	1696	S1	CGAATTGGTGTATACC-1	Sample 1_nCoV 1 scRNA-seq [SW103]	GSM4509011	63	PBMC	M	COVID-19 patient	severe COVID-19 patient	16.8737	3022	1427	Naive B cells	B cells	severe COVID-19 patient
toy	488	249	S1	CGAATTGGTTATGACC-1	Sample 1_nCoV 1 scRNA-seq [SW103]	GSM4509011	63	PBMC	M	COVID-19 patient	severe COVID-19 patient	4.91803	1852	392	HSC_-G-CSF	HSC_-G-CSF	severe COVID-19 patient
toy	5807	1515	S1	CGACAGCAGGTCTACT-1	Sample 1_nCoV 1 scRNA-seq [SW103]	GSM4509011	63	PBMC	M	COVID-19 patient	severe COVID-19 patient	8.90305	2879	1183	Th1/Th17 cells	CD4+ T cells	severe COVID-19 patient
toy	917	339	S1	CGACAGCAGGTGGTTG-1	Sample 1_nCoV 1 scRNA-seq [SW103]	GSM4509011	63	PBMC	M	COVID-19 patient	severe COVID-19 patient	11.0142	2080	418	Platelets	Platelets	severe COVID-19 patient
toy	7056	1781	S1	CGACAGCCAACAGTGG-1	Sample 1_nCoV 1 scRNA-seq [SW103]	GSM4509011	63	PBMC	M	COVID-19 patient	severe COVID-19 patient	4.59184	2644	987	Naive CD4 T cells	CD4+ T cells	severe COVID-19 patient
toy	1316	442	S1	CGACAGCGTGCACATT-1	Sample 1_nCoV 1 scRNA-seq [SW103]	GSM4509011	63	PBMC	M	COVID-19 patient	severe COVID-19 patient	15.1216	2168	463	Platelets	Platelets	severe COVID-19 patient
toy	8023	2445	S1	CGAGAAGCAAAGGTTA-1	Sample 1_nCoV 1 scRNA-seq [SW103]	GSM4509011	63	PBMC	M	COVID-19 patient	severe COVID-19 patient	6.53122	2422	1066	Classical monocytes	Monocytes	severe COVID-19 patient
toy	4032	1500	S1	CGAGAAGCACTATCCC-1	Sample 1_nCoV 1 scRNA-seq [SW103]	GSM4509011	63	PBMC	M	COVID-19 patient	severe COVID-19 patient	7.71329	2880	1478	Natural killer cells	NK cells	severe COVID-19 patient
toy	9476	2144	S1	CGAGAAGCATGACTCA-1	Sample 1_nCoV 1 scRNA-seq [SW103]	GSM4509011	63	PBMC	M	COVID-19 patient	severe COVID-19 patient	3.57746	2369	714	Th2 cells	CD4+ T cells	severe COVID-19 patient
toy	5993	2089	S1	CGAGAAGGTCTCTCTG-1	Sample 1_nCoV 1 scRNA-seq [SW103]	GSM4509011	63	PBMC	M	COVID-19 patient	severe COVID-19 patient	7.77574	3024	1657	Classical monocytes	Monocytes	severe COVID-19 patient
toy	15190	3694	S1	CGAGAAGGTTGCGGCT-1	Sample 1_nCoV 1 scRNA-seq [SW103]	GSM4509011	63	PBMC	M	COVID-19 patient	severe COVID-19 patient	7.62344	2532	1181	Classical monocytes	Monocytes	severe COVID-19 patient
toy	14149	3406	S1	CGAGGAAAGGTTAAAC-1	Sample 1_nCoV 1 scRNA-seq [SW103]	GSM4509011	63	PBMC	M	COVID-19 patient	severe COVID-19 patient	4.32539	2584	1208	Classical monocytes	Monocytes	severe COVID-19 patient
toy	407	294	S1	CGAGGAACAAGGACAC-1	Sample 1_nCoV 1 scRNA-seq [SW103]	GSM4509011	63	PBMC	M	COVID-19 patient	severe COVID-19 patient	2.457	1779	426	NA	Dendritic cells	severe COVID-19 patient
toy	11714	2934	S1	CGAGGCTCAACCTATG-1	Sample 1_nCoV 1 scRNA-seq [SW103]	GSM4509011	63	PBMC	M	COVID-19 patient	severe COVID-19 patient	11.7125	2543	1102	Classical monocytes	Monocytes	severe COVID-19 patient
toy	3767	1570	S1	CGAGGCTCACTAACCA-1	Sample 1_nCoV 1 scRNA-seq [SW103]	GSM4509011	63	PBMC	M	COVID-19 patient	severe COVID-19 patient	6.55694	2892	1563	Classical monocytes	Monocytes	severe COVID-19 patient
toy	3407	511	S1	CGAGGCTTCACACCGG-1	Sample 1_nCoV 1 scRNA-seq [SW103]	GSM4509011	63	PBMC	M	COVID-19 patient	severe COVID-19 patient	7.51394	2768	488	NA	NA	severe COVID-19 patient
toy	4953	1805	S1	CGAGGCTTCACCGGTG-1	Sample 1_nCoV 1 scRNA-seq [SW103]	GSM4509011	63	PBMC	M	COVID-19 patient	severe COVID-19 patient	4.7446	3061	1677	Natural killer cells	NK cells	severe COVID-19 patient
toy	12826	3172	S1	CGAGGCTTCCTTCAGC-1	Sample 1_nCoV 1 scRNA-seq [SW103]	GSM4509011	63	PBMC	M	COVID-19 patient	severe COVID-19 patient	8.89599	2568	1131	Intermediate monocytes	Monocytes	severe COVID-19 patient
toy	6925	1646	S1	CGAGTGCAGCACTAAA-1	Sample 1_nCoV 1 scRNA-seq [SW103]	GSM4509011	63	PBMC	M	COVID-19 patient	severe COVID-19 patient	6.06498	2665	973	Th2 cells	CD4+ T cells	severe COVID-19 patient
toy	4175	1371	S1	CGAGTGCAGCCGCTTG-1	Sample 1_nCoV 1 scRNA-seq [SW103]	GSM4509011	63	PBMC	M	COVID-19 patient	severe COVID-19 patient	6.58683	2872	1351	Naive B cells	B cells	severe COVID-19 patient
toy	2054	674	S1	CGAGTGCCAACAGATA-1	Sample 1_nCoV 1 scRNA-seq [SW103]	GSM4509011	63	PBMC	M	COVID-19 patient	severe COVID-19 patient	19.6203	2301	673	T regulatory cells	CD4+ T cells	severe COVID-19 patient
toy	3132	1233	S1	CGAGTGCCATAATGCC-1	Sample 1_nCoV 1 scRNA-seq [SW103]	GSM4509011	63	PBMC	M	COVID-19 patient	severe COVID-19 patient	9.92976	2726	1232	Classical monocytes	Monocytes	severe COVID-19 patient
toy	5055	1279	S1	CGAGTGCGTCGAGCAA-1	Sample 1_nCoV 1 scRNA-seq [SW103]	GSM4509011	63	PBMC	M	COVID-19 patient	severe COVID-19 patient	11.2957	2871	1139	Non-switched memory B cells	B cells	severe COVID-19 patient
toy	11785	2923	S1	CGAGTTACAATGACCT-1	Sample 1_nCoV 1 scRNA-seq [SW103]	GSM4509011	63	PBMC	M	COVID-19 patient	severe COVID-19 patient	6.23674	2590	1133	Classical monocytes	Monocytes	severe COVID-19 patient
toy	3791	1359	S1	CGAGTTAGTGAGGAAA-1	Sample 1_nCoV 1 scRNA-seq [SW103]	GSM4509011	63	PBMC	M	COVID-19 patient	severe COVID-19 patient	7.72883	2841	1351	Natural killer cells	NK cells	severe COVID-19 patient
toy	7861	2251	S1	CGAGTTATCGCCTAGG-1	Sample 1_nCoV 1 scRNA-seq [SW103]	GSM4509011	63	PBMC	M	COVID-19 patient	severe COVID-19 patient	19.0815	2425	917	Effector memory CD8 T cells	T cells	severe COVID-19 patient
toy	13399	3225	S1	CGATCGGCAACTCATG-1	Sample 1_nCoV 1 scRNA-seq [SW103]	GSM4509011	63	PBMC	M	COVID-19 patient	severe COVID-19 patient	5.93328	2600	1218	Classical monocytes	Monocytes	severe COVID-19 patient
toy	15328	3423	S1	CGATCGGCACTGAATC-1	Sample 1_nCoV 1 scRNA-seq [SW103]	GSM4509011	63	PBMC	M	COVID-19 patient	severe COVID-19 patient	7.15684	2607	1147	Classical monocytes	Monocytes	severe COVID-19 patient
toy	8490	2436	S1	CGATCGGCATCCTTCG-1	Sample 1_nCoV 1 scRNA-seq [SW103]	GSM4509011	63	PBMC	M	COVID-19 patient	severe COVID-19 patient	8.04476	2444	1015	Classical monocytes	Monocytes	severe COVID-19 patient
toy	8181	2523	S1	CGATCGGGTACGCTAT-1	Sample 1_nCoV 1 scRNA-seq [SW103]	GSM4509011	63	PBMC	M	COVID-19 patient	severe COVID-19 patient	14.2159	2386	1026	Classical monocytes	Monocytes	severe COVID-19 patient
toy	12456	3168	S1	CGATCGGGTAGACTGG-1	Sample 1_nCoV 1 scRNA-seq [SW103]	GSM4509011	63	PBMC	M	COVID-19 patient	severe COVID-19 patient	6.88825	2560	1198	Classical monocytes	Monocytes	severe COVID-19 patient
toy	11932	2935	S1	CGATCGGGTAGGCAAC-1	Sample 1_nCoV 1 scRNA-seq [SW103]	GSM4509011	63	PBMC	M	COVID-19 patient	severe COVID-19 patient	5.87496	2590	1106	Classical monocytes	Monocytes	severe COVID-19 patient
toy	4441	1533	S1	CGATCGGGTATCTCGA-1	Sample 1_nCoV 1 scRNA-seq [SW103]	GSM4509011	63	PBMC	M	COVID-19 patient	severe COVID-19 patient	6.68768	2944	1497	Terminal effector CD4 T cells	T cells	severe COVID-19 patient
toy	5067	1503	S1	CGATCGGTCGATGGAG-1	Sample 1_nCoV 1 scRNA-seq [SW103]	GSM4509011	63	PBMC	M	COVID-19 patient	severe COVID-19 patient	9.72962	2965	1376	Vd2 gd T cells	T cells	severe COVID-19 patient
toy	3637	1207	S1	CGATCGGTCGTTATCT-1	Sample 1_nCoV 1 scRNA-seq [SW103]	GSM4509011	63	PBMC	M	COVID-19 patient	severe COVID-19 patient	5.27908	2806	1206	Naive B cells	B cells	severe COVID-19 patient
toy	2382	203	S1	CGATGCGCAACAACAA-1	Sample 1_nCoV 1 scRNA-seq [SW103]	GSM4509011	63	PBMC	M	COVID-19 patient	severe COVID-19 patient	4.78589	2418	203	Erythroblast	Erythroblast	severe COVID-19 patient
toy	3564	1123	S1	CGATGCGCATTGTGCA-1	Sample 1_nCoV 1 scRNA-seq [SW103]	GSM4509011	63	PBMC	M	COVID-19 patient	severe COVID-19 patient	11.6442	2800	1095	Platelets	Platelets	severe COVID-19 patient
toy	457	239	S1	CGATGCGGTCGGTACC-1	Sample 1_nCoV 1 scRNA-seq [SW103]	GSM4509011	63	PBMC	M	COVID-19 patient	severe COVID-19 patient	14.0044	1854	382	HSC_-G-CSF	HSC_-G-CSF	severe COVID-19 patient
toy	895	410	S1	CGATGCGGTTCAGGTT-1	Sample 1_nCoV 1 scRNA-seq [SW103]	GSM4509011	63	PBMC	M	COVID-19 patient	severe COVID-19 patient	9.8324	2037	497	Platelets	Platelets	severe COVID-19 patient
toy	606	300	S1	CGATGCGTCCTCACGT-1	Sample 1_nCoV 1 scRNA-seq [SW103]	GSM4509011	63	PBMC	M	COVID-19 patient	severe COVID-19 patient	6.76568	1842	431	NA	NA	severe COVID-19 patient
toy	8987	2182	S1	CGATGCGTCGTTGTTT-1	Sample 1_nCoV 1 scRNA-seq [SW103]	GSM4509011	63	PBMC	M	COVID-19 patient	severe COVID-19 patient	8.54568	2370	755	Switched memory B cells	B cells	severe COVID-19 patient
toy	4133	1546	S1	CGATGGCAGAATTGTG-1	Sample 1_nCoV 1 scRNA-seq [SW103]	GSM4509011	63	PBMC	M	COVID-19 patient	severe COVID-19 patient	8.56521	2890	1523	Classical monocytes	Monocytes	severe COVID-19 patient
toy	7514	1627	S1	CGATGGCAGACAAGCC-1	Sample 1_nCoV 1 scRNA-seq [SW103]	GSM4509011	63	PBMC	M	COVID-19 patient	severe COVID-19 patient	4.56481	2480	708	Th2 cells	CD4+ T cells	severe COVID-19 patient
toy	4668	1265	S1	CGATGGCAGTCCTACA-1	Sample 1_nCoV 1 scRNA-seq [SW103]	GSM4509011	63	PBMC	M	COVID-19 patient	severe COVID-19 patient	10.7969	2891	1190	Naive B cells	B cells	severe COVID-19 patient
toy	5992	318	S1	CGATGGCCAAGCGAAC-1	Sample 1_nCoV 1 scRNA-seq [SW103]	GSM4509011	63	PBMC	M	COVID-19 patient	severe COVID-19 patient	2.26969	3178	203	Erythroblast	Erythroblast	severe COVID-19 patient
toy	5867	2020	S1	CGATGGCGTTGTGGCC-1	Sample 1_nCoV 1 scRNA-seq [SW103]	GSM4509011	63	PBMC	M	COVID-19 patient	severe COVID-19 patient	11.8289	3026	1639	Intermediate monocytes	Monocytes	severe COVID-19 patient
toy	1129	473	S1	CGATGGCTCAGTGATC-1	Sample 1_nCoV 1 scRNA-seq [SW103]	GSM4509011	63	PBMC	M	COVID-19 patient	severe COVID-19 patient	17.5376	2284	534	T regulatory cells	NA	severe COVID-19 patient
toy	4462	1678	S1	CGCAGGTAGTCTAACC-1	Sample 1_nCoV 1 scRNA-seq [SW103]	GSM4509011	63	PBMC	M	COVID-19 patient	severe COVID-19 patient	6.94756	2987	1641	Classical monocytes	Monocytes	severe COVID-19 patient
toy	8054	1660	S1	CGCAGGTGTGTGTTTG-1	Sample 1_nCoV 1 scRNA-seq [SW103]	GSM4509011	63	PBMC	M	COVID-19 patient	severe COVID-19 patient	7.42488	2394	580	Non-switched memory B cells	B cells	severe COVID-19 patient
toy	13533	3484	S1	CGCAGGTGTTTGTTCT-1	Sample 1_nCoV 1 scRNA-seq [SW103]	GSM4509011	63	PBMC	M	COVID-19 patient	severe COVID-19 patient	6.91643	2529	1189	Classical monocytes	Monocytes	severe COVID-19 patient
toy	6080	1605	S1	CGCAGGTTCATGGCCG-1	Sample 1_nCoV 1 scRNA-seq [SW103]	GSM4509011	63	PBMC	M	COVID-19 patient	severe COVID-19 patient	6.94079	2888	1220	Switched memory B cells	B cells	severe COVID-19 patient
toy	9266	896	S1	CGCAGGTTCGAGATAA-1	Sample 1_nCoV 1 scRNA-seq [SW103]	GSM4509011	63	PBMC	M	COVID-19 patient	severe COVID-19 patient	4.73775	3261	266	Erythroblast	Erythroblast	severe COVID-19 patient
toy	7201	2446	S1	CGCAGGTTCGCAGTGC-1	Sample 1_nCoV 1 scRNA-seq [SW103]	GSM4509011	63	PBMC	M	COVID-19 patient	severe COVID-19 patient	7.97112	2606	1321	Classical monocytes	Monocytes	severe COVID-19 patient
toy	2151	603	S1	CGCAGGTTCGCTCATC-1	Sample 1_nCoV 1 scRNA-seq [SW103]	GSM4509011	63	PBMC	M	COVID-19 patient	severe COVID-19 patient	12.0409	2306	602	Platelets	Platelets	severe COVID-19 patient
toy	718	303	S1	CGCAGGTTCTGACGCG-1	Sample 1_nCoV 1 scRNA-seq [SW103]	GSM4509011	63	PBMC	M	COVID-19 patient	severe COVID-19 patient	7.10306	1927	405	HSC_-G-CSF	HSC_-G-CSF	severe COVID-19 patient
toy	4316	1633	S1	CGCATAAAGGAATCGC-1	Sample 1_nCoV 1 scRNA-seq [SW103]	GSM4509011	63	PBMC	M	COVID-19 patient	severe COVID-19 patient	7.53012	2951	1599	Natural killer cells	NK cells	severe COVID-19 patient
toy	591	348	S1	CGCATAAAGGTGCTAG-1	Sample 1_nCoV 1 scRNA-seq [SW103]	GSM4509011	63	PBMC	M	COVID-19 patient	severe COVID-19 patient	19.797	1886	442	NA	NA	severe COVID-19 patient
toy	9010	2596	S1	CGCATAAAGTCCTACA-1	Sample 1_nCoV 1 scRNA-seq [SW103]	GSM4509011	63	PBMC	M	COVID-19 patient	severe COVID-19 patient	5.21643	2400	1006	Classical monocytes	Monocytes	severe COVID-19 patient
toy	972	440	S1	CGCATGGAGATGTTCC-1	Sample 1_nCoV 1 scRNA-seq [SW103]	GSM4509011	63	PBMC	M	COVID-19 patient	severe COVID-19 patient	5.76132	2021	522	Platelets	Platelets	severe COVID-19 patient
toy	5534	1222	S1	CGCATGGGTTGGGCCT-1	Sample 1_nCoV 1 scRNA-seq [SW103]	GSM4509011	63	PBMC	M	COVID-19 patient	severe COVID-19 patient	9.93856	2854	1009	Naive B cells	B cells	severe COVID-19 patient
toy	1903	649	S1	CGCATGGTCCGCTTAC-1	Sample 1_nCoV 1 scRNA-seq [SW103]	GSM4509011	63	PBMC	M	COVID-19 patient	severe COVID-19 patient	2.36469	2205	649	Platelets	Platelets	severe COVID-19 patient
toy	7428	2250	S1	CGCATGGTCCTGGCTT-1	Sample 1_nCoV 1 scRNA-seq [SW103]	GSM4509011	63	PBMC	M	COVID-19 patient	severe COVID-19 patient	9.92192	2463	1038	Classical monocytes	Monocytes	severe COVID-19 patient
toy	5916	1861	S1	CGCATGGTCGATACAC-1	Sample 1_nCoV 1 scRNA-seq [SW103]	GSM4509011	63	PBMC	M	COVID-19 patient	severe COVID-19 patient	7.97836	3000	1500	Terminal effector CD8 T cells	T cells	severe COVID-19 patient
toy	7329	2248	S1	CGCCAGAAGCAAGCCA-1	Sample 1_nCoV 1 scRNA-seq [SW103]	GSM4509011	63	PBMC	M	COVID-19 patient	severe COVID-19 patient	16.4825	2482	1063	Classical monocytes	Monocytes	severe COVID-19 patient
toy	13259	3166	S1	CGCCAGAAGGAACATT-1	Sample 1_nCoV 1 scRNA-seq [SW103]	GSM4509011	63	PBMC	M	COVID-19 patient	severe COVID-19 patient	5.9733	2590	1170	Classical monocytes	Monocytes	severe COVID-19 patient
toy	9099	2158	S1	CGCCAGAGTGAGTGAC-1	Sample 1_nCoV 1 scRNA-seq [SW103]	GSM4509011	63	PBMC	M	COVID-19 patient	severe COVID-19 patient	7.47335	2397	737	Switched memory B cells	B cells	severe COVID-19 patient
toy	6078	1624	S1	CGCCAGATCGACTCCT-1	Sample 1_nCoV 1 scRNA-seq [SW103]	GSM4509011	63	PBMC	M	COVID-19 patient	severe COVID-19 patient	4.65614	2861	1199	Th2 cells	CD8+ T cells	severe COVID-19 patient
toy	6924	1851	S1	CGCCATTGTAAGATAC-1	Sample 1_nCoV 1 scRNA-seq [SW103]	GSM4509011	63	PBMC	M	COVID-19 patient	severe COVID-19 patient	8.3911	2724	1083	Naive B cells	B cells	severe COVID-19 patient
toy	13637	2937	S1	CGCCATTGTCAAGTTC-1	Sample 1_nCoV 1 scRNA-seq [SW103]	GSM4509011	63	PBMC	M	COVID-19 patient	severe COVID-19 patient	9.32756	2511	872	Exhausted B cells	B cells	severe COVID-19 patient
toy	2634	986	S1	CGCCATTTCCACGGGT-1	Sample 1_nCoV 1 scRNA-seq [SW103]	GSM4509011	63	PBMC	M	COVID-19 patient	severe COVID-19 patient	13.4776	2532	984	Naive B cells	B cells	severe COVID-19 patient
toy	11012	2994	S1	CGCCATTTCCCGATCT-1	Sample 1_nCoV 1 scRNA-seq [SW103]	GSM4509011	63	PBMC	M	COVID-19 patient	severe COVID-19 patient	8.49982	2521	1155	Classical monocytes	Monocytes	severe COVID-19 patient
toy	9423	2567	S1	CGCCATTTCTTCGTAT-1	Sample 1_nCoV 1 scRNA-seq [SW103]	GSM4509011	63	PBMC	M	COVID-19 patient	severe COVID-19 patient	8.37313	2517	983	Classical monocytes	Monocytes	severe COVID-19 patient
toy	3517	1351	S1	CGCGTGAGTTAAAGTG-1	Sample 1_nCoV 1 scRNA-seq [SW103]	GSM4509011	63	PBMC	M	COVID-19 patient	severe COVID-19 patient	6.7387	2827	1350	Natural killer cells	NK cells	severe COVID-19 patient
toy	7293	1433	S1	CGCGTGATCACCGGGT-1	Sample 1_nCoV 1 scRNA-seq [SW103]	GSM4509011	63	PBMC	M	COVID-19 patient	severe COVID-19 patient	5.36131	2499	626	Naive B cells	B cells	severe COVID-19 patient
toy	8293	2507	S1	CGGAACCAGGGCTAAC-1	Sample 1_nCoV 1 scRNA-seq [SW103]	GSM4509011	63	PBMC	M	COVID-19 patient	severe COVID-19 patient	7.39178	2397	1051	Classical monocytes	Monocytes	severe COVID-19 patient
toy	1947	240	S1	CGGAACCCACCTGCGA-1	Sample 1_nCoV 1 scRNA-seq [SW103]	GSM4509011	63	PBMC	M	COVID-19 patient	severe COVID-19 patient	4.00616	2229	239	Erythroblast	Erythroblast	severe COVID-19 patient
toy	1328	654	S1	CGGAACCCATCCCGTT-1	Sample 1_nCoV 1 scRNA-seq [SW103]	GSM4509011	63	PBMC	M	COVID-19 patient	severe COVID-19 patient	8.28313	2002	704	Platelets	Platelets	severe COVID-19 patient
toy	4903	1622	S1	CGGAACCGTCGGCACT-1	Sample 1_nCoV 1 scRNA-seq [SW103]	GSM4509011	63	PBMC	M	COVID-19 patient	severe COVID-19 patient	9.64715	3015	1504	Natural killer cells	NK cells	severe COVID-19 patient
toy	1158	406	S1	CGGAACCTCCGAGAAG-1	Sample 1_nCoV 1 scRNA-seq [SW103]	GSM4509011	63	PBMC	M	COVID-19 patient	severe COVID-19 patient	14.5078	2216	463	Platelets	Platelets	severe COVID-19 patient
toy	16070	4009	S1	CGGAATTAGATCGCTT-1	Sample 1_nCoV 1 scRNA-seq [SW103]	GSM4509011	63	PBMC	M	COVID-19 patient	severe COVID-19 patient	6.54636	2538	1207	HSC_CD34+	HSC_CD34+	severe COVID-19 patient
toy	3520	1048	S1	CGGAATTAGGACATCG-1	Sample 1_nCoV 1 scRNA-seq [SW103]	GSM4509011	63	PBMC	M	COVID-19 patient	severe COVID-19 patient	11.3636	2744	1044	Naive CD8 T cells	CD8+ T cells	severe COVID-19 patient
toy	15913	3588	S1	CGGAATTCACCGCTGA-1	Sample 1_nCoV 1 scRNA-seq [SW103]	GSM4509011	63	PBMC	M	COVID-19 patient	severe COVID-19 patient	6.20248	2529	1115	Classical monocytes	Monocytes	severe COVID-19 patient
toy	12484	2948	S1	CGGAATTGTGACTCTA-1	Sample 1_nCoV 1 scRNA-seq [SW103]	GSM4509011	63	PBMC	M	COVID-19 patient	severe COVID-19 patient	6.71259	2467	914	NA	NA	severe COVID-19 patient
toy	772	337	S1	CGGAATTTCCTCTAAT-1	Sample 1_nCoV 1 scRNA-seq [SW103]	GSM4509011	63	PBMC	M	COVID-19 patient	severe COVID-19 patient	4.40415	1969	432	Platelets	Platelets	severe COVID-19 patient
toy	2638	483	S1	CGGACACAGAACCGCA-1	Sample 1_nCoV 1 scRNA-seq [SW103]	GSM4509011	63	PBMC	M	COVID-19 patient	severe COVID-19 patient	2.19864	2541	482	Erythroblast	Erythroblast	severe COVID-19 patient
toy	4330	1375	S1	CGGACACAGAGAGGTA-1	Sample 1_nCoV 1 scRNA-seq [SW103]	GSM4509011	63	PBMC	M	COVID-19 patient	severe COVID-19 patient	5.6582	2894	1342	Naive B cells	B cells	severe COVID-19 patient
toy	4798	1330	S1	CGGACACAGTGTAGAT-1	Sample 1_nCoV 1 scRNA-seq [SW103]	GSM4509011	63	PBMC	M	COVID-19 patient	severe COVID-19 patient	5.91913	2925	1244	Naive B cells	B cells	severe COVID-19 patient
toy	1672	331	S1	CGGACACGTACAACGG-1	Sample 1_nCoV 1 scRNA-seq [SW103]	GSM4509011	63	PBMC	M	COVID-19 patient	severe COVID-19 patient	10.1077	2167	331	Platelets	Platelets	severe COVID-19 patient
toy	5254	1753	S1	CGGACACGTAGTCTTG-1	Sample 1_nCoV 1 scRNA-seq [SW103]	GSM4509011	63	PBMC	M	COVID-19 patient	severe COVID-19 patient	10.4301	3040	1568	Vd2 gd T cells	T cells	severe COVID-19 patient
toy	454	230	S1	CGGACACGTATGATCC-1	Sample 1_nCoV 1 scRNA-seq [SW103]	GSM4509011	63	PBMC	M	COVID-19 patient	severe COVID-19 patient	6.38767	1861	368	Progenitor cells	NA	severe COVID-19 patient
toy	971	286	S1	CGGACACGTCTAATCG-1	Sample 1_nCoV 1 scRNA-seq [SW103]	GSM4509011	63	PBMC	M	COVID-19 patient	severe COVID-19 patient	15.242	2136	348	HSC_-G-CSF	HSC_-G-CSF	severe COVID-19 patient
toy	7318	2262	S1	CGGACACGTGACCGAA-1	Sample 1_nCoV 1 scRNA-seq [SW103]	GSM4509011	63	PBMC	M	COVID-19 patient	severe COVID-19 patient	6.68215	2525	1120	Classical monocytes	Monocytes	severe COVID-19 patient
toy	498	236	S1	CGGAGAAAGAAGTCCG-1	Sample 1_nCoV 1 scRNA-seq [SW103]	GSM4509011	63	PBMC	M	COVID-19 patient	severe COVID-19 patient	13.8554	1881	378	HSC_-G-CSF	HSC_-G-CSF	severe COVID-19 patient
toy	5519	235	S1	CGGAGAACACAGCTGC-1	Sample 1_nCoV 1 scRNA-seq [SW103]	GSM4509011	63	PBMC	M	COVID-19 patient	severe COVID-19 patient	0.308027	3138	161	Erythroblast	Erythroblast	severe COVID-19 patient
toy	655	242	S1	CGGAGAATCAGGCGAA-1	Sample 1_nCoV 1 scRNA-seq [SW103]	GSM4509011	63	PBMC	M	COVID-19 patient	severe COVID-19 patient	5.64885	1967	358	HSC_-G-CSF	HSC_-G-CSF	severe COVID-19 patient
toy	7326	1892	S1	CGGCAGTAGACCATAA-1	Sample 1_nCoV 1 scRNA-seq [SW103]	GSM4509011	63	PBMC	M	COVID-19 patient	severe COVID-19 patient	4.73655	2557	920	Non-switched memory B cells	B cells	severe COVID-19 patient
toy	9228	2771	S1	CGGCAGTCAATTAGGA-1	Sample 1_nCoV 1 scRNA-seq [SW103]	GSM4509011	63	PBMC	M	COVID-19 patient	severe COVID-19 patient	5.74339	2439	1110	Classical monocytes	Monocytes	severe COVID-19 patient
toy	10656	2795	S1	CGGCAGTCACTACGGC-1	Sample 1_nCoV 1 scRNA-seq [SW103]	GSM4509011	63	PBMC	M	COVID-19 patient	severe COVID-19 patient	5.45233	2543	1118	Intermediate monocytes	Monocytes	severe COVID-19 patient
toy	681	275	S1	CGGCAGTCAGACCAGA-1	Sample 1_nCoV 1 scRNA-seq [SW103]	GSM4509011	63	PBMC	M	COVID-19 patient	severe COVID-19 patient	8.2232	1989	362	HSC_-G-CSF	HSC_-G-CSF	severe COVID-19 patient
toy	8214	2486	S1	CGGCAGTTCCAAGCCG-1	Sample 1_nCoV 1 scRNA-seq [SW103]	GSM4509011	63	PBMC	M	COVID-19 patient	severe COVID-19 patient	5.90455	2472	1104	Classical monocytes	Monocytes	severe COVID-19 patient
toy	9754	2728	S1	CGGGACTAGTCAGGGT-1	Sample 1_nCoV 1 scRNA-seq [SW103]	GSM4509011	63	PBMC	M	COVID-19 patient	severe COVID-19 patient	8.03773	2457	1042	Intermediate monocytes	Monocytes	severe COVID-19 patient
toy	7153	1614	S1	CGGGACTAGTTGGACG-1	Sample 1_nCoV 1 scRNA-seq [SW103]	GSM4509011	63	PBMC	M	COVID-19 patient	severe COVID-19 patient	6.96211	2578	801	Naive CD4 T cells	CD4+ T cells	severe COVID-19 patient
toy	5701	1502	S1	CGGGACTCATAATCCG-1	Sample 1_nCoV 1 scRNA-seq [SW103]	GSM4509011	63	PBMC	M	COVID-19 patient	severe COVID-19 patient	8.68269	2925	1222	Naive B cells	B cells	severe COVID-19 patient
toy	1254	610	S1	CGGGACTCATCGTCCT-1	Sample 1_nCoV 1 scRNA-seq [SW103]	GSM4509011	63	PBMC	M	COVID-19 patient	severe COVID-19 patient	7.17703	2159	622	Vd2 gd T cells	T cells	severe COVID-19 patient
toy	19748	4297	S1	CGGGACTCATGGATCT-1	Sample 1_nCoV 1 scRNA-seq [SW103]	GSM4509011	63	PBMC	M	COVID-19 patient	severe COVID-19 patient	6.97792	2425	1111	Intermediate monocytes	Monocytes	severe COVID-19 patient
toy	5856	1507	S1	CGGGACTGTTAAACCC-1	Sample 1_nCoV 1 scRNA-seq [SW103]	GSM4509011	63	PBMC	M	COVID-19 patient	severe COVID-19 patient	5.6694	2895	1195	Naive B cells	B cells	severe COVID-19 patient
toy	14240	3273	S1	CGGGACTTCTCGTTTA-1	Sample 1_nCoV 1 scRNA-seq [SW103]	GSM4509011	63	PBMC	M	COVID-19 patient	severe COVID-19 patient	7.23315	2517	1066	Classical monocytes	Monocytes	severe COVID-19 patient
toy	8009	2442	S1	CGGGCATAGAGGCCAT-1	Sample 1_nCoV 1 scRNA-seq [SW103]	GSM4509011	63	PBMC	M	COVID-19 patient	severe COVID-19 patient	5.03184	2411	1048	Classical monocytes	Monocytes	severe COVID-19 patient
toy	528	249	S1	CGGGCATAGTTGGAGC-1	Sample 1_nCoV 1 scRNA-seq [SW103]	GSM4509011	63	PBMC	M	COVID-19 patient	severe COVID-19 patient	9.09091	1911	357	NA	NA	severe COVID-19 patient
toy	6653	1648	S1	CGGGCATGTCCATACA-1	Sample 1_nCoV 1 scRNA-seq [SW103]	GSM4509011	63	PBMC	M	COVID-19 patient	severe COVID-19 patient	7.90621	2745	1083	T regulatory cells	CD4+ T cells	severe COVID-19 patient
toy	7246	2336	S1	CGGGTCACATCGCTGG-1	Sample 1_nCoV 1 scRNA-seq [SW103]	GSM4509011	63	PBMC	M	COVID-19 patient	severe COVID-19 patient	7.6042	2575	1207	Intermediate monocytes	Monocytes	severe COVID-19 patient
toy	1777	571	S1	CGGGTCACATGAATAG-1	Sample 1_nCoV 1 scRNA-seq [SW103]	GSM4509011	63	PBMC	M	COVID-19 patient	severe COVID-19 patient	6.64041	2195	571	Platelets	Platelets	severe COVID-19 patient
toy	10316	1846	S1	CGGGTCAGTGCTCTTC-1	Sample 1_nCoV 1 scRNA-seq [SW103]	GSM4509011	63	PBMC	M	COVID-19 patient	severe COVID-19 patient	17.691	2786	523	Plasmablasts	B cells	severe COVID-19 patient
toy	14273	3191	S1	CGGGTCAGTTACACAC-1	Sample 1_nCoV 1 scRNA-seq [SW103]	GSM4509011	63	PBMC	M	COVID-19 patient	severe COVID-19 patient	7.5317	2535	1083	Classical monocytes	Monocytes	severe COVID-19 patient
toy	18502	3880	S1	CGGGTCATCATTGGTG-1	Sample 1_nCoV 1 scRNA-seq [SW103]	GSM4509011	63	PBMC	M	COVID-19 patient	severe COVID-19 patient	5.92368	2511	1127	Classical monocytes	Monocytes	severe COVID-19 patient
toy	1525	684	S1	CGGGTGTAGAGAATCT-1	Sample 1_nCoV 1 scRNA-seq [SW103]	GSM4509011	63	PBMC	M	COVID-19 patient	severe COVID-19 patient	4.2623	2052	709	Platelets	Platelets	severe COVID-19 patient
toy	4802	1541	S1	CGGGTGTCAGGCGATA-1	Sample 1_nCoV 1 scRNA-seq [SW103]	GSM4509011	63	PBMC	M	COVID-19 patient	severe COVID-19 patient	5.85173	2987	1457	Naive B cells	B cells	severe COVID-19 patient
toy	4638	1494	S1	CGGGTGTGTCTTGAAC-1	Sample 1_nCoV 1 scRNA-seq [SW103]	GSM4509011	63	PBMC	M	COVID-19 patient	severe COVID-19 patient	10.3062	2943	1428	Terminal effector CD4 T cells	T cells	severe COVID-19 patient
toy	11222	3080	S1	CGGTCAGCAGAACATA-1	Sample 1_nCoV 1 scRNA-seq [SW103]	GSM4509011	63	PBMC	M	COVID-19 patient	severe COVID-19 patient	10.9873	2534	1182	Classical monocytes	Monocytes	severe COVID-19 patient
toy	737	253	S1	CGGTCAGCAGTGCCTG-1	Sample 1_nCoV 1 scRNA-seq [SW103]	GSM4509011	63	PBMC	M	COVID-19 patient	severe COVID-19 patient	14.2469	2027	329	HSC_-G-CSF	HSC_-G-CSF	severe COVID-19 patient
toy	8267	2659	S1	CGGTCAGTCAGCGCAC-1	Sample 1_nCoV 1 scRNA-seq [SW103]	GSM4509011	63	PBMC	M	COVID-19 patient	severe COVID-19 patient	7.41502	2420	1131	Classical monocytes	Monocytes	severe COVID-19 patient
toy	3228	1290	S1	CGTAAGTGTCAACACT-1	Sample 1_nCoV 1 scRNA-seq [SW103]	GSM4509011	63	PBMC	M	COVID-19 patient	severe COVID-19 patient	8.58116	2757	1288	Classical monocytes	Monocytes	severe COVID-19 patient
toy	5296	1430	S1	CGTAAGTTCCCTCTAG-1	Sample 1_nCoV 1 scRNA-seq [SW103]	GSM4509011	63	PBMC	M	COVID-19 patient	severe COVID-19 patient	15.54	2927	1232	Naive B cells	B cells	severe COVID-19 patient
toy	762	250	S1	CGTAAGTTCTCATGCC-1	Sample 1_nCoV 1 scRNA-seq [SW103]	GSM4509011	63	PBMC	M	COVID-19 patient	severe COVID-19 patient	8.53018	2010	354	HSC_-G-CSF	HSC_-G-CSF	severe COVID-19 patient
toy	8380	1935	S1	CGTAAGTTCTCGGCTT-1	Sample 1_nCoV 1 scRNA-seq [SW103]	GSM4509011	63	PBMC	M	COVID-19 patient	severe COVID-19 patient	13.043	2406	685	Exhausted B cells	B cells	severe COVID-19 patient
toy	8978	2690	S1	CGTAATGAGACCCGCT-1	Sample 1_nCoV 1 scRNA-seq [SW103]	GSM4509011	63	PBMC	M	COVID-19 patient	severe COVID-19 patient	9.66808	2413	1055	Classical monocytes	Monocytes	severe COVID-19 patient
toy	8018	2103	S1	CGTAATGAGGGAGGCA-1	Sample 1_nCoV 1 scRNA-seq [SW103]	GSM4509011	63	PBMC	M	COVID-19 patient	severe COVID-19 patient	10.7009	2457	847	Non-switched memory B cells	B cells	severe COVID-19 patient
toy	12248	3192	S1	CGTAATGCAATTGAGA-1	Sample 1_nCoV 1 scRNA-seq [SW103]	GSM4509011	63	PBMC	M	COVID-19 patient	severe COVID-19 patient	4.89876	2543	1175	Classical monocytes	Monocytes	severe COVID-19 patient
toy	9139	2615	S1	CGTAATGCACTGAATC-1	Sample 1_nCoV 1 scRNA-seq [SW103]	GSM4509011	63	PBMC	M	COVID-19 patient	severe COVID-19 patient	5.62425	2423	1023	Classical monocytes	Monocytes	severe COVID-19 patient
toy	3753	1348	S1	CGTAATGTCGTCAACA-1	Sample 1_nCoV 1 scRNA-seq [SW103]	GSM4509011	63	PBMC	M	COVID-19 patient	severe COVID-19 patient	17.6659	2831	1335	Natural killer cells	NK cells	severe COVID-19 patient
toy	14102	3170	S1	CGTAGTAAGGGATCTG-1	Sample 1_nCoV 1 scRNA-seq [SW103]	GSM4509011	63	PBMC	M	COVID-19 patient	severe COVID-19 patient	9.96313	2515	1045	Classical monocytes	Monocytes	severe COVID-19 patient
toy	3416	1293	S1	CGTAGTATCTGTGCTC-1	Sample 1_nCoV 1 scRNA-seq [SW103]	GSM4509011	63	PBMC	M	COVID-19 patient	severe COVID-19 patient	17.0667	2803	1290	Classical monocytes	Monocytes	severe COVID-19 patient
toy	11959	3028	S1	CGTCAAAAGCCGAATG-1	Sample 1_nCoV 1 scRNA-seq [SW103]	GSM4509011	63	PBMC	M	COVID-19 patient	severe COVID-19 patient	8.21139	2563	1145	Classical monocytes	Monocytes	severe COVID-19 patient
toy	516	271	S1	CGTCAAAAGTAGGTTA-1	Sample 1_nCoV 1 scRNA-seq [SW103]	GSM4509011	63	PBMC	M	COVID-19 patient	severe COVID-19 patient	9.49612	1787	418	HSC_-G-CSF	HSC_-G-CSF	severe COVID-19 patient
toy	553	284	S1	CGTCAAAGTCGACGCT-1	Sample 1_nCoV 1 scRNA-seq [SW103]	GSM4509011	63	PBMC	M	COVID-19 patient	severe COVID-19 patient	12.8391	1823	423	HSC_-G-CSF	HSC_-G-CSF	severe COVID-19 patient
toy	5317	1899	S1	CGTCAAATCAACTGAC-1	Sample 1_nCoV 1 scRNA-seq [SW103]	GSM4509011	63	PBMC	M	COVID-19 patient	severe COVID-19 patient	10.1561	3120	1710	Natural killer cells	NK cells	severe COVID-19 patient
toy	1859	617	S1	CGTCAAATCCGACGGT-1	Sample 1_nCoV 1 scRNA-seq [SW103]	GSM4509011	63	PBMC	M	COVID-19 patient	severe COVID-19 patient	4.2496	2230	617	Platelets	Platelets	severe COVID-19 patient
toy	5748	1938	S1	CGTCCATAGCATCGAG-1	Sample 1_nCoV 1 scRNA-seq [SW103]	GSM4509011	63	PBMC	M	COVID-19 patient	severe COVID-19 patient	9.55115	3041	1611	Classical monocytes	Monocytes	severe COVID-19 patient
toy	5310	1474	S1	CGTCCATGTTGATGTC-1	Sample 1_nCoV 1 scRNA-seq [SW103]	GSM4509011	63	PBMC	M	COVID-19 patient	severe COVID-19 patient	8.81356	2964	1299	Non-switched memory B cells	B cells	severe COVID-19 patient
toy	6349	2065	S1	CGTCCATTCGTTCCTG-1	Sample 1_nCoV 1 scRNA-seq [SW103]	GSM4509011	63	PBMC	M	COVID-19 patient	severe COVID-19 patient	10.2063	2885	1463	Classical monocytes	Monocytes	severe COVID-19 patient
toy	568	309	S1	CGTCCATTCTCAAAGC-1	Sample 1_nCoV 1 scRNA-seq [SW103]	GSM4509011	63	PBMC	M	COVID-19 patient	severe COVID-19 patient	5.28169	1838	446	HSC_-G-CSF	HSC_-G-CSF	severe COVID-19 patient
toy	3412	1356	S1	CGTGAATCAGAGTCTT-1	Sample 1_nCoV 1 scRNA-seq [SW103]	GSM4509011	63	PBMC	M	COVID-19 patient	severe COVID-19 patient	11.1665	2804	1352	Classical monocytes	Monocytes	severe COVID-19 patient
toy	27600	4455	S1	CGTGAATGTATGTGTC-1	Sample 1_nCoV 1 scRNA-seq [SW103]	GSM4509011	63	PBMC	M	COVID-19 patient	severe COVID-19 patient	10.5471	2650	1113	Effector memory CD8 T cells	CD8+ T cells	severe COVID-19 patient
toy	3941	1419	S1	CGTGAATGTCATCGCG-1	Sample 1_nCoV 1 scRNA-seq [SW103]	GSM4509011	63	PBMC	M	COVID-19 patient	severe COVID-19 patient	9.43923	2862	1409	Natural killer cells	NK cells	severe COVID-19 patient
toy	5175	1553	S1	CGTGAATGTTCGTGCG-1	Sample 1_nCoV 1 scRNA-seq [SW103]	GSM4509011	63	PBMC	M	COVID-19 patient	severe COVID-19 patient	12.9469	2976	1383	Terminal effector CD4 T cells	T cells	severe COVID-19 patient
toy	836	346	S1	CGTGAATTCGAAGTGG-1	Sample 1_nCoV 1 scRNA-seq [SW103]	GSM4509011	63	PBMC	M	COVID-19 patient	severe COVID-19 patient	10.1675	2011	438	Platelets	Platelets	severe COVID-19 patient
toy	10525	2088	S1	CGTGAATTCTCCTGAC-1	Sample 1_nCoV 1 scRNA-seq [SW103]	GSM4509011	63	PBMC	M	COVID-19 patient	severe COVID-19 patient	5.43468	2385	621	Th17 cells	CD4+ T cells	severe COVID-19 patient
toy	5261	1648	S1	CGTGATAAGGTCCCTG-1	Sample 1_nCoV 1 scRNA-seq [SW103]	GSM4509011	63	PBMC	M	COVID-19 patient	severe COVID-19 patient	11.7468	2989	1464	Terminal effector CD8 T cells	T cells	severe COVID-19 patient
toy	2947	967	S1	CGTGATACAAACCACT-1	Sample 1_nCoV 1 scRNA-seq [SW103]	GSM4509011	63	PBMC	M	COVID-19 patient	severe COVID-19 patient	7.26162	2616	965	Naive CD4 T cells	CD4+ T cells	severe COVID-19 patient
toy	1517	643	S1	CGTGATAGTTCTCGTC-1	Sample 1_nCoV 1 scRNA-seq [SW103]	GSM4509011	63	PBMC	M	COVID-19 patient	severe COVID-19 patient	11.5359	2136	645	Naive B cells	B cells	severe COVID-19 patient
toy	3876	1416	S1	CGTGATATCATTACTC-1	Sample 1_nCoV 1 scRNA-seq [SW103]	GSM4509011	63	PBMC	M	COVID-19 patient	severe COVID-19 patient	19.7884	2850	1403	Classical monocytes	Monocytes	severe COVID-19 patient
toy	5747	1411	S1	CGTGCTTAGAAGGCTC-1	Sample 1_nCoV 1 scRNA-seq [SW103]	GSM4509011	63	PBMC	M	COVID-19 patient	severe COVID-19 patient	6.42074	2918	1144	Naive B cells	B cells	severe COVID-19 patient
toy	5690	1602	S1	CGTGCTTCACTGCTTC-1	Sample 1_nCoV 1 scRNA-seq [SW103]	GSM4509011	63	PBMC	M	COVID-19 patient	severe COVID-19 patient	10.0703	2941	1330	Terminal effector CD4 T cells	T cells	severe COVID-19 patient
toy	1131	558	S1	CGTGCTTGTTATCTGG-1	Sample 1_nCoV 1 scRNA-seq [SW103]	GSM4509011	63	PBMC	M	COVID-19 patient	severe COVID-19 patient	0.618921	2242	582	NA	NA	severe COVID-19 patient
toy	942	406	S1	CGTGTCTAGTTGGGAC-1	Sample 1_nCoV 1 scRNA-seq [SW103]	GSM4509011	63	PBMC	M	COVID-19 patient	severe COVID-19 patient	4.03397	2045	491	Platelets	Platelets	severe COVID-19 patient
toy	3223	977	S1	CGTGTCTCACAAGCCC-1	Sample 1_nCoV 1 scRNA-seq [SW103]	GSM4509011	63	PBMC	M	COVID-19 patient	severe COVID-19 patient	15.6686	2686	976	Th2 cells	CD4+ T cells	severe COVID-19 patient
toy	504	265	S1	CGTGTCTCATCGCTAA-1	Sample 1_nCoV 1 scRNA-seq [SW103]	GSM4509011	63	PBMC	M	COVID-19 patient	severe COVID-19 patient	10.119	1833	387	HSC_-G-CSF	HSC_-G-CSF	severe COVID-19 patient
toy	4677	1717	S1	CGTGTCTTCTGCGGCA-1	Sample 1_nCoV 1 scRNA-seq [SW103]	GSM4509011	63	PBMC	M	COVID-19 patient	severe COVID-19 patient	9.42912	3023	1652	Classical monocytes	Monocytes	severe COVID-19 patient
toy	5799	1542	S1	CGTTAGACAAGCAATA-1	Sample 1_nCoV 1 scRNA-seq [SW103]	GSM4509011	63	PBMC	M	COVID-19 patient	severe COVID-19 patient	4.75944	2902	1227	Non-switched memory B cells	B cells	severe COVID-19 patient
toy	645	342	S1	CGTTAGAGTACTCCGG-1	Sample 1_nCoV 1 scRNA-seq [SW103]	GSM4509011	63	PBMC	M	COVID-19 patient	severe COVID-19 patient	5.11628	1821	470	Platelets	Platelets	severe COVID-19 patient
toy	3919	246	S1	CGTTCTGAGGAAGTCC-1	Sample 1_nCoV 1 scRNA-seq [SW103]	GSM4509011	63	PBMC	M	COVID-19 patient	severe COVID-19 patient	0.459301	2849	204	Erythroblast	Erythroblast	severe COVID-19 patient
toy	7480	2362	S1	CGTTCTGAGTAACGTA-1	Sample 1_nCoV 1 scRNA-seq [SW103]	GSM4509011	63	PBMC	M	COVID-19 patient	severe COVID-19 patient	6.29679	2516	1164	Th1/Th17 cells	T cells	severe COVID-19 patient
toy	1807	854	S1	CGTTCTGCAAGGAGTC-1	Sample 1_nCoV 1 scRNA-seq [SW103]	GSM4509011	63	PBMC	M	COVID-19 patient	severe COVID-19 patient	15.938	2168	854	Classical monocytes	Monocytes	severe COVID-19 patient
toy	6426	1662	S1	CGTTCTGCAGCAGAAC-1	Sample 1_nCoV 1 scRNA-seq [SW103]	GSM4509011	63	PBMC	M	COVID-19 patient	severe COVID-19 patient	5.60224	2811	1129	Naive B cells	B cells	severe COVID-19 patient
toy	9568	2779	S1	CGTTCTGCAGGTGTTT-1	Sample 1_nCoV 1 scRNA-seq [SW103]	GSM4509011	63	PBMC	M	COVID-19 patient	severe COVID-19 patient	8.14172	2375	997	Classical monocytes	Monocytes	severe COVID-19 patient
toy	15018	3753	S1	CGTTCTGGTATATGGA-1	Sample 1_nCoV 1 scRNA-seq [SW103]	GSM4509011	63	PBMC	M	COVID-19 patient	severe COVID-19 patient	7.51765	2558	1183	Intermediate monocytes	Monocytes	severe COVID-19 patient
toy	11132	2955	S1	CGTTCTGGTCTGCAAT-1	Sample 1_nCoV 1 scRNA-seq [SW103]	GSM4509011	63	PBMC	M	COVID-19 patient	severe COVID-19 patient	5.94682	2597	1179	Effector memory CD8 T cells	T cells	severe COVID-19 patient
toy	1000	542	S1	CGTTCTGTCAAGGCTT-1	Sample 1_nCoV 1 scRNA-seq [SW103]	GSM4509011	63	PBMC	M	COVID-19 patient	severe COVID-19 patient	11.3	2136	574	NA	NA	severe COVID-19 patient
toy	4402	1565	S1	CGTTCTGTCGTAACAC-1	Sample 1_nCoV 1 scRNA-seq [SW103]	GSM4509011	63	PBMC	M	COVID-19 patient	severe COVID-19 patient	11.5629	2965	1532	Natural killer cells	NK cells	severe COVID-19 patient
toy	7987	1959	S1	CGTTGGGCAAACTCTG-1	Sample 1_nCoV 1 scRNA-seq [SW103]	GSM4509011	63	PBMC	M	COVID-19 patient	severe COVID-19 patient	5.60911	2434	781	Vd2 gd T cells	T cells	severe COVID-19 patient
toy	1542	501	S1	CGTTGGGGTATCCCAA-1	Sample 1_nCoV 1 scRNA-seq [SW103]	GSM4509011	63	PBMC	M	COVID-19 patient	severe COVID-19 patient	6.48508	2162	510	Platelets	Platelets	severe COVID-19 patient
toy	816	419	S1	CGTTGGGTCGGCGATC-1	Sample 1_nCoV 1 scRNA-seq [SW103]	GSM4509011	63	PBMC	M	COVID-19 patient	severe COVID-19 patient	5.51471	1971	491	Platelets	Platelets	severe COVID-19 patient
toy	9495	2674	S1	CGTTGGGTCGTCTACC-1	Sample 1_nCoV 1 scRNA-seq [SW103]	GSM4509011	63	PBMC	M	COVID-19 patient	severe COVID-19 patient	8.20432	2438	1044	Classical monocytes	Monocytes	severe COVID-19 patient
toy	9719	1857	S1	CTAACCCAGAGTTGAT-1	Sample 1_nCoV 1 scRNA-seq [SW103]	GSM4509011	63	PBMC	M	COVID-19 patient	severe COVID-19 patient	8.21072	2343	523	Naive CD8 T cells	CD8+ T cells	severe COVID-19 patient
toy	6147	1850	S1	CTAACCCAGATCACCT-1	Sample 1_nCoV 1 scRNA-seq [SW103]	GSM4509011	63	PBMC	M	COVID-19 patient	severe COVID-19 patient	5.87278	2948	1404	Terminal effector CD4 T cells	T cells	severe COVID-19 patient
toy	2433	1021	S1	CTAACCCAGATGAACT-1	Sample 1_nCoV 1 scRNA-seq [SW103]	GSM4509011	63	PBMC	M	COVID-19 patient	severe COVID-19 patient	3.98685	2432	1020	Th1 cells	CD4+ T cells	severe COVID-19 patient
toy	2267	268	S1	CTAACCCCAAGCTGCC-1	Sample 1_nCoV 1 scRNA-seq [SW103]	GSM4509011	63	PBMC	M	COVID-19 patient	severe COVID-19 patient	6.79312	2366	268	NA	NA	severe COVID-19 patient
toy	6858	1921	S1	CTAACCCCACTGAGTT-1	Sample 1_nCoV 1 scRNA-seq [SW103]	GSM4509011	63	PBMC	M	COVID-19 patient	severe COVID-19 patient	3.42666	2760	1201	Naive CD4 T cells	CD4+ T cells	severe COVID-19 patient
toy	11033	2635	S1	CTAACCCGTGGGCTCT-1	Sample 1_nCoV 1 scRNA-seq [SW103]	GSM4509011	63	PBMC	M	COVID-19 patient	severe COVID-19 patient	11.8463	2436	827	Exhausted B cells	B cells	severe COVID-19 patient
toy	1451	697	S1	CTAACCCTCTCTCTAA-1	Sample 1_nCoV 1 scRNA-seq [SW103]	GSM4509011	63	PBMC	M	COVID-19 patient	severe COVID-19 patient	14.8863	2078	719	Low-density neutrophils	Neutrophils	severe COVID-19 patient
toy	3590	1370	S1	CTAACTTAGAACTCCT-1	Sample 1_nCoV 1 scRNA-seq [SW103]	GSM4509011	63	PBMC	M	COVID-19 patient	severe COVID-19 patient	7.52089	2830	1362	Classical monocytes	Monocytes	severe COVID-19 patient
toy	813	397	S1	CTAACTTCAGGTTCAT-1	Sample 1_nCoV 1 scRNA-seq [SW103]	GSM4509011	63	PBMC	M	COVID-19 patient	severe COVID-19 patient	8.97909	1951	498	Platelets	Platelets	severe COVID-19 patient
toy	6727	1786	S1	CTAACTTGTGTGTTTG-1	Sample 1_nCoV 1 scRNA-seq [SW103]	GSM4509011	63	PBMC	M	COVID-19 patient	severe COVID-19 patient	6.77865	2736	1108	Central memory CD8 T cells	CD8+ T cells	severe COVID-19 patient
toy	579	283	S1	CTAACTTTCAAGAAAC-1	Sample 1_nCoV 1 scRNA-seq [SW103]	GSM4509011	63	PBMC	M	COVID-19 patient	severe COVID-19 patient	4.31779	1846	419	HSC_-G-CSF	HSC_-G-CSF	severe COVID-19 patient
toy	4109	283	S1	CTAACTTTCCGTGGTG-1	Sample 1_nCoV 1 scRNA-seq [SW103]	GSM4509011	63	PBMC	M	COVID-19 patient	severe COVID-19 patient	0.194695	2912	257	Erythroblast	Erythroblast	severe COVID-19 patient
toy	2654	765	S1	CTAACTTTCCGTGTGG-1	Sample 1_nCoV 1 scRNA-seq [SW103]	GSM4509011	63	PBMC	M	COVID-19 patient	severe COVID-19 patient	2.56217	2556	765	Platelets	Platelets	severe COVID-19 patient
toy	726	346	S1	CTAAGTGAGAAGATCT-1	Sample 1_nCoV 1 scRNA-seq [SW103]	GSM4509011	63	PBMC	M	COVID-19 patient	severe COVID-19 patient	6.88705	1896	442	Platelets	Platelets	severe COVID-19 patient
toy	1824	474	S1	CTAAGTGAGACAACTA-1	Sample 1_nCoV 1 scRNA-seq [SW103]	GSM4509011	63	PBMC	M	COVID-19 patient	severe COVID-19 patient	4.82456	2270	474	Platelets	Platelets	severe COVID-19 patient
toy	8842	2568	S1	CTAAGTGAGACAAGCC-1	Sample 1_nCoV 1 scRNA-seq [SW103]	GSM4509011	63	PBMC	M	COVID-19 patient	severe COVID-19 patient	8.17688	2416	1017	Classical monocytes	Monocytes	severe COVID-19 patient
toy	12367	3107	S1	CTAAGTGCAATCTAGC-1	Sample 1_nCoV 1 scRNA-seq [SW103]	GSM4509011	63	PBMC	M	COVID-19 patient	severe COVID-19 patient	4.6899	2611	1215	Classical monocytes	Monocytes	severe COVID-19 patient
toy	841	313	S1	CTAAGTGTCTAGCAAC-1	Sample 1_nCoV 1 scRNA-seq [SW103]	GSM4509011	63	PBMC	M	COVID-19 patient	severe COVID-19 patient	10.107	2032	404	HSC_-G-CSF	HSC_-G-CSF	severe COVID-19 patient
toy	8100	2170	S1	CTACAGAAGCCTCTGG-1	Sample 1_nCoV 1 scRNA-seq [SW103]	GSM4509011	63	PBMC	M	COVID-19 patient	severe COVID-19 patient	5.95062	2367	797	Switched memory B cells	B cells	severe COVID-19 patient
toy	2410	950	S1	CTACAGACACGCGCTA-1	Sample 1_nCoV 1 scRNA-seq [SW103]	GSM4509011	63	PBMC	M	COVID-19 patient	severe COVID-19 patient	15.3942	2418	947	Follicular helper T cells	CD4+ T cells	severe COVID-19 patient
toy	44513	3409	S1	CTACAGAGTAGGTTTC-1	Sample 1_nCoV 1 scRNA-seq [SW103]	GSM4509011	63	PBMC	M	COVID-19 patient	severe COVID-19 patient	3.24849	3114	356	Plasmablasts	B cells	severe COVID-19 patient
toy	1220	227	S1	CTACAGAGTGGTAATA-1	Sample 1_nCoV 1 scRNA-seq [SW103]	GSM4509011	63	PBMC	M	COVID-19 patient	severe COVID-19 patient	1.88525	2042	288	Platelets	Platelets	severe COVID-19 patient
toy	689	277	S1	CTACAGATCCCGAACG-1	Sample 1_nCoV 1 scRNA-seq [SW103]	GSM4509011	63	PBMC	M	COVID-19 patient	severe COVID-19 patient	7.69231	1931	387	Platelets	Platelets	severe COVID-19 patient
toy	3266	1210	S1	CTACATTAGGACTTCT-1	Sample 1_nCoV 1 scRNA-seq [SW103]	GSM4509011	63	PBMC	M	COVID-19 patient	severe COVID-19 patient	4.89896	2747	1209	Th17 cells	CD4+ T cells	severe COVID-19 patient
toy	1450	493	S1	CTACATTCAGTATACC-1	Sample 1_nCoV 1 scRNA-seq [SW103]	GSM4509011	63	PBMC	M	COVID-19 patient	severe COVID-19 patient	9.37931	2127	518	Platelets	Platelets	severe COVID-19 patient
toy	880	384	S1	CTACATTGTCTTTCTA-1	Sample 1_nCoV 1 scRNA-seq [SW103]	GSM4509011	63	PBMC	M	COVID-19 patient	severe COVID-19 patient	5.11364	2042	467	Platelets	Platelets	severe COVID-19 patient
toy	8817	2154	S1	CTACATTGTGCGTGCT-1	Sample 1_nCoV 1 scRNA-seq [SW103]	GSM4509011	63	PBMC	M	COVID-19 patient	severe COVID-19 patient	5.1378	2382	768	Th1/Th17 cells	CD4+ T cells	severe COVID-19 patient
toy	7005	2257	S1	CTACATTTCGAACGGA-1	Sample 1_nCoV 1 scRNA-seq [SW103]	GSM4509011	63	PBMC	M	COVID-19 patient	severe COVID-19 patient	7.60885	2688	1293	Intermediate monocytes	Monocytes	severe COVID-19 patient
toy	8186	2174	S1	CTACCCACAAATGGTA-1	Sample 1_nCoV 1 scRNA-seq [SW103]	GSM4509011	63	PBMC	M	COVID-19 patient	severe COVID-19 patient	9.88273	2428	891	MAIT cells	T cells	severe COVID-19 patient
toy	12581	2719	S1	CTACCCACAGACACCC-1	Sample 1_nCoV 1 scRNA-seq [SW103]	GSM4509011	63	PBMC	M	COVID-19 patient	severe COVID-19 patient	4.01399	2423	805	Th2 cells	CD4+ T cells	severe COVID-19 patient
toy	11075	2405	S1	CTACCCACAGGTTTAC-1	Sample 1_nCoV 1 scRNA-seq [SW103]	GSM4509011	63	PBMC	M	COVID-19 patient	severe COVID-19 patient	3.5395	2407	744	Th17 cells	CD4+ T cells	severe COVID-19 patient
toy	6429	1482	S1	CTACCCAGTAGCGCCT-1	Sample 1_nCoV 1 scRNA-seq [SW103]	GSM4509011	63	PBMC	M	COVID-19 patient	severe COVID-19 patient	8.21279	2735	986	Th2 cells	CD4+ T cells	severe COVID-19 patient
toy	10579	2829	S1	CTACCCAGTCATCCGG-1	Sample 1_nCoV 1 scRNA-seq [SW103]	GSM4509011	63	PBMC	M	COVID-19 patient	severe COVID-19 patient	7.29748	2487	1095	Classical monocytes	Monocytes	severe COVID-19 patient
toy	4016	270	S1	CTACCCAGTTTCTTAC-1	Sample 1_nCoV 1 scRNA-seq [SW103]	GSM4509011	63	PBMC	M	COVID-19 patient	severe COVID-19 patient	1.04582	2876	238	Erythroblast	Erythroblast	severe COVID-19 patient
toy	672	441	S1	CTACCCATCATCTACT-1	Sample 1_nCoV 1 scRNA-seq [SW103]	GSM4509011	63	PBMC	M	COVID-19 patient	severe COVID-19 patient	7.7381	1856	517	NA	NA	severe COVID-19 patient
toy	6116	1758	S1	CTACCCATCGTGGGAA-1	Sample 1_nCoV 1 scRNA-seq [SW103]	GSM4509011	63	PBMC	M	COVID-19 patient	severe COVID-19 patient	16.2198	2865	1302	Classical monocytes	Monocytes	severe COVID-19 patient
[truncated: 60,323 more rows]

## Sheet: B. MSC clusters
B. Multi-scale clusters identified MSC in .GMT format.
[truncated: 100 more rows]
[truncated: 5,000 more columns]

[truncated: 2 more sheets: C. MSC table, D. Samplewise enrichment]
